# Supplementary material for: Asymmetric Brønsted base-catalyzed aza-Michael addition and [3 + 2] cycloaddition reactions of N-ester acylhydrazones and enones
Source: Royal Society of Chemistry journal article supplement (doi:10.1039/d2qo01527g), 2022-01-01
Supplement: d2qo01527g1.pdf [file d2qo01527g1.pdf]

## Supporting Information

### **Asymmetric Brønsted Base-Catalyzed Aza-Michael Addition and [3+2] Cycloaddition Reactions of *N*-Ester Acylhydrazones and Enones**

Bo Zhu,\* Huili Sun, Huihui Fan, Mengqi Wang, Fangyuan Guo, Yubing Zhai, Gongming Zhu and Junbiao Chang,\*

NMPA Key Laboratory for Research and Evaluation of Innovative Drug, Henan Key Laboratory of Organic Functional Molecule and Drug Innovation, School of Chemistry and Chemical Engineering, Henan Normal University, Henan, 453007, P. R. China

E-mail: zbtiantang@126.com; cjb@htu.edu.cn

## content

|                                                                                                |     |
|------------------------------------------------------------------------------------------------|-----|
| 1. General information .....                                                                   | 3   |
| 2. Synthesis of substrates .....                                                               | 4   |
| 3. Optimization of asymmetric reaction conditions .....                                        | 5   |
| 4. General procedure for the catalytic asymmetric reaction.....                                | 9   |
| 5. Synthetic application of the asymmetric reaction .....                                      | 10  |
| 6. Control experiments.....                                                                    | 12  |
| 7. Cell culture and cytotoxicity (CCK-8) assay.....                                            | 14  |
| 8. Determination of the absolute configuration of the products <b>3la</b> and <b>4aa</b> ..... | 15  |
| 9. Characterization data of the products.....                                                  | 18  |
| 10. Copies of NMR spectra.....                                                                 | 62  |
| 11. Copies of HPLC spectra.....                                                                | 191 |



## 1. General information

All solvents and reagents were purchased from commercial sources and purified according to established procedures before use.  $^1\text{H}$  NMR spectra were recorded on Bruker Avance III HD 600 or Avance 400 MHz spectrometer. Chemical shifts are recorded in ppm relative to tetramethylsilane and with the solvent resonance as the internal standard. Data are reported as follows: chemical shift, multiplicity (s = singlet, d = doublet, dd = doublet of doublets, t = triplet, q = quaternary, m = multiplet), coupling constants (Hz), integration.  $^{13}\text{C}\{^1\text{H}\}$  NMR data were collected on Bruker Avance III HD 150 or Avance 100 MHz spectrometer. Chemical shifts are reported in ppm from the tetramethylsilane with the solvent resonance as internal standard. Enantiomer excesses were determined by chiral HPLC analysis on Chiralcel IA/IB/IC/ID/IF/IG/IH/MD/OD-H/OJ-H in comparison with the authentic racemates. Chiral HPLC analysis was operated at Thermo scientific Dionex Ultimate 3000. Optical rotations were reported as follows:  $[\alpha]_{\text{D}}^{\text{T}}$  (c: g/100 mL, in solvent). Optical rotations recorded on Autopol Automatic Polarimeter. HRMS was obtained by an ABI/Sciex QStar Mass Spectrometer (ESI). All melting points were conducted on a digital melting point apparatus and were uncorrected. TLC was performed on glass-backed silica plate.

## 2. Synthesis of substrates

General procedure for the synthesis of substrates **1**

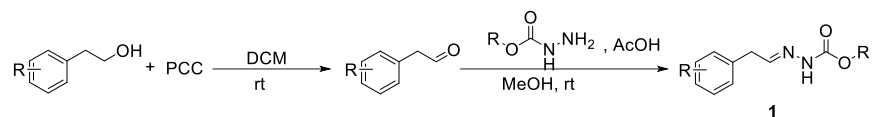

Pyridinium chlorochromate (7.5 mmol, 1.5 eq) and respective phenylethanol (5 mmol, 1.0 eq) dissolved in 25 mL dichloromethane, the resultant mixture was stirred for 5 h. Following this, the reaction was filtered through a silica plug and washed through with diethyl ether, and the solvent was removed to give the crude phenylacetaldehyde product (Colorless oil, 40-60% yields).

To a solution of methyl carbazate (10 mmol, 1.0 eq) in MeOH (30 mL) was added the respective phenylacetaldehyde (10 mmol, 1.0 eq) and glacial acetic acid (0.3 mL). The mixture was stirred at room temperature for 30 min and then concentrated. The resulting white solid obtained was dried in a vacuum oven and used without further purification.

### 3. Optimization of Asymmetric Reaction Conditions

3.1 The optimization of the enantioselective aza-Michael addition reaction catalyzed by organocatalyst

**Table S1. The effect of catalyst<sup>a</sup>**

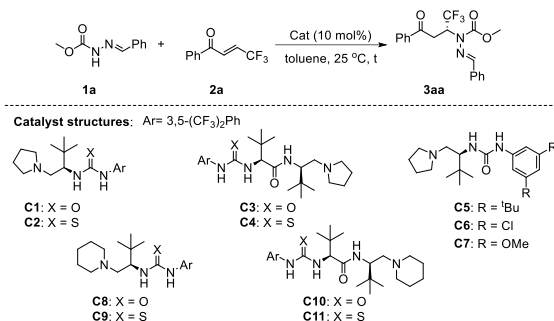

| entry    | Cat.       | time (h) | yield (%) <sup>b</sup> | ee (%) <sup>c</sup> |
|----------|------------|----------|------------------------|---------------------|
| 1        | <b>C1</b>  | 96       | 40                     | 95                  |
| 2        | <b>C2</b>  | 96       | 20                     | 95                  |
| 3        | <b>C3</b>  | 96       | 5                      | 83                  |
| 4        | <b>C4</b>  | 96       | trace                  | N.A.                |
| <b>5</b> | <b>C5</b>  | 30       | 80                     | 98                  |
| 6        | <b>C6</b>  | 60       | 40                     | 97                  |
| 7        | <b>C7</b>  | 30       | 70                     | 98                  |
| 8        | <b>C8</b>  | 96       | 20                     | 94                  |
| 9        | <b>C9</b>  | 96       | 15                     | 93                  |
| 10       | <b>C10</b> | 96       | 30                     | 93                  |
| 11       | <b>C11</b> | 96       | trace                  | N.A.                |

<sup>a</sup> Reaction conditions: **1a** (0.1 mmol), Cat. (0.01 mmol), **2a** (0.2 mmol), and toluene (0.5 mL). <sup>b</sup>

Yield of isolated product. <sup>c</sup> Determined by HPLC analysis on a chiral stationary phase.

**Table S2. The effect of solvents<sup>a</sup>**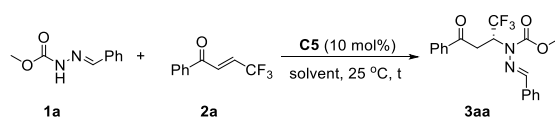

| entry | solvent                                      | time (h) | yield (%) <sup>b</sup> | ee (%) <sup>c</sup> |
|-------|----------------------------------------------|----------|------------------------|---------------------|
| 1     | THF                                          | 96       | 10                     | 85                  |
| 2     | DCM                                          | 44       | 60                     | 95                  |
| 3     | MeCN                                         | 96       | 10                     | 73                  |
| 4     | Et <sub>2</sub> O                            | 96       | 10                     | 95                  |
| 5     | PhCl                                         | 30       | 60                     | 97                  |
| 6     | mesitylene                                   | 30       | 63                     | 97                  |
| 7     | <i>m</i> -xylene                             | 30       | 65                     | 96                  |
| 8     | <i>o</i> -xylene                             | 30       | 64                     | 96                  |
| 9     | PhCF <sub>3</sub>                            | 30       | 58                     | 97                  |
| 10    | C <sub>6</sub> H <sub>5</sub> F <sub>5</sub> | 96       | 20                     | 92                  |
| 11    | PhBr                                         | 30       | 45                     | 97                  |

<sup>a</sup> Reaction conditions: **1a** (0.1 mmol), **C5** (0.01 mmol), **2a** (0.2 mmol), and solvent (0.5 mL). <sup>b</sup> Yield of isolated product. <sup>c</sup> Determined by HPLC analysis on a chiral stationary phase.

**Table S3. The effect of temperature<sup>a</sup>**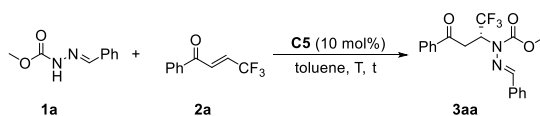

| entry | T (°C) | time (h) | yield (%) <sup>b</sup> | ee (%) <sup>c</sup> |
|-------|--------|----------|------------------------|---------------------|
| 1     | 30     | 23       | 83                     | 98                  |
| 2     | 15     | 60       | 77                     | 98                  |
| 3     | 40     | 18       | 60                     | 94                  |

<sup>a</sup> Reaction conditions: **1a** (0.1 mmol), **C5** (0.01 mmol), **2a** (0.2 mmol), and toluene (0.5 mL). <sup>b</sup> Yield of isolated product. <sup>c</sup> Determined by HPLC analysis on a chiral stationary phase.

### 3.2 The optimization of the enantioselective [3+2] cycloaddition reaction catalyzed by organocatalyst

**Table S4. The effect of catalyst<sup>a</sup>**

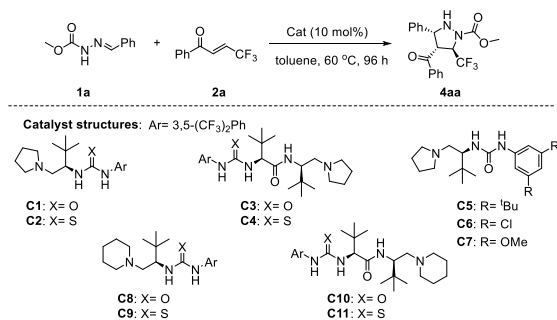

| Entry | Cat.       | yield (%) <sup>b</sup> | ee (%) <sup>c</sup> | dr <sup>d</sup> |
|-------|------------|------------------------|---------------------|-----------------|
| 1     | <b>C1</b>  | 69                     | 86                  | >20:1           |
| 2     | <b>C2</b>  | 56                     | 83                  | >20:1           |
| 3     | <b>C3</b>  | 30                     | 61                  | >20:1           |
| 4     | <b>C4</b>  | 30                     | 58                  | >20:1           |
| 5     | <b>C5</b>  | 83                     | 92                  | >20:1           |
| 6     | <b>C6</b>  | 80                     | 85                  | >20:1           |
| 7     | <b>C7</b>  | 81                     | 91                  | >20:1           |
| 8     | <b>C8</b>  | 35                     | 80                  | >20:1           |
| 9     | <b>C9</b>  | 55                     | 89                  | >20:1           |
| 10    | <b>C10</b> | 45                     | 8                   | >20:1           |
| 11    | <b>C11</b> | 30                     | 27                  | >20:1           |

<sup>a</sup> Reaction conditions: **1a** (0.1 mmol), Cat. (0.01 mmol), **2a** (0.2 mmol), and toluene (0.5 mL). <sup>b</sup> Yield of isolated product. <sup>c</sup> Determined by HPLC analysis on a chiral stationary phase. <sup>d</sup> The dr was determined by <sup>1</sup>H NMR analysis of the reaction mixture.

**Table S5. The effect of solvents<sup>a</sup>**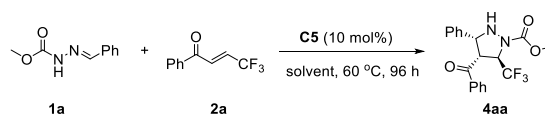

| entry | solvent                         | yield (%) <sup>b</sup> | ee (%) <sup>c</sup> | dr <sup>d</sup> |
|-------|---------------------------------|------------------------|---------------------|-----------------|
| 1     | THF                             | 59                     | 84                  | >20:1           |
| 2     | DCM                             | 53                     | 85                  | >20:1           |
| 3     | MeCN                            | 48                     | 61                  | >20:1           |
| 4     | PhCl                            | 84                     | 86                  | >20:1           |
| 5     | mesitylene                      | 53                     | 92                  | >20:1           |
| 6     | <i>m</i> -xylene                | 59                     | 86                  | >20:1           |
| 7     | <i>o</i> -xylene                | 75                     | 87                  | >20:1           |
| 8     | PhCF <sub>3</sub>               | 53                     | 81                  | >20:1           |
| 9     | C <sub>6</sub> H <sub>5</sub> F | 53                     | 80                  | >20:1           |
| 10    | PhBr                            | 64                     | 85                  | >20:1           |

<sup>a</sup> Reaction conditions: **1a** (0.1 mmol), **C5** (0.01 mmol), **2a** (0.2 mmol), and solvent (0.5 mL). <sup>b</sup> Yield of isolated product. <sup>c</sup> Determined by HPLC analysis on a chiral stationary phase. <sup>d</sup> The dr was determined by <sup>1</sup>H NMR analysis of the reaction mixture.

**Table S6. The effect of temperature<sup>a</sup>**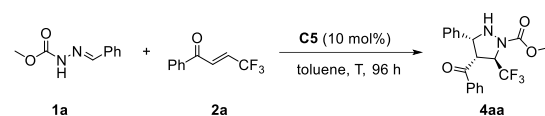

| entry | T (°C) | yield (%) <sup>b</sup> | ee (%) <sup>c</sup> | dr <sup>d</sup> |
|-------|--------|------------------------|---------------------|-----------------|
| 1     | 50     | 53                     | 93                  | >20:1           |
| 2     | 70     | 58                     | 88                  | >20:1           |

<sup>a</sup> Reaction conditions: **1a** (0.1 mmol), **C5** (0.01 mmol), **2a** (0.2 mmol), and toluene (0.5 mL). <sup>b</sup> Yield of isolated product. <sup>c</sup> Determined by HPLC analysis on a chiral stationary phase. <sup>d</sup> The dr was determined by <sup>1</sup>H NMR analysis of the reaction mixture.

## 4. General procedure for the catalytic asymmetric reaction

4.1 General procedure for the asymmetric aza-Michael addition catalyzed by organocatalyst

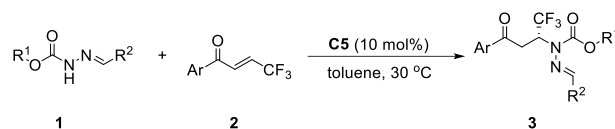

Acylhydrazone **1** (0.1 mmol, 1 eq), **C5** (4.0 mg, 0.1 eq) were dissolved in toluene (0.5 mL), Then  $\beta$ -trifluoromethyl- $\alpha,\beta$ -unsaturated ketone **2** (0.2 mmol, 2.0 eq) was added. The reaction mixture was stirred at 30 °C and monitored by TLC. Upon complete consumption acylhydrazone **1**, the organic solvent was removed and the residue was purified by column chromatography to give the product, which was then directly analyzed by HPLC to determine to enantiomeric excess.

4.2 General procedure for the asymmetric [3+2] cycloaddition catalyzed by organocatalyst

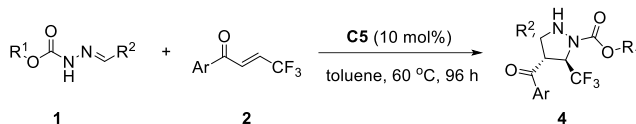

Acylhydrazone **1** (0.1 mmol, 1.0 eq), **C5** (4.0 mg, 0.1 eq) were dissolved in toluene (0.5 mL), Then  $\beta$ -trifluoromethyl- $\alpha,\beta$ -unsaturated ketone **2** (0.2 mmol, 2.0 eq) was added. The reaction mixture was stirred at 60 °C and monitored by TLC. Upon complete consumption acylhydrazone **1**, the organic solvent was removed and the residue was purified by column chromatography to give the product, which was then directly analyzed by HPLC to determine to enantiomeric excess.

## 5. Synthetic application of the asymmetric reaction

### 5.1 Gram-Scale Synthesis of **3aa**

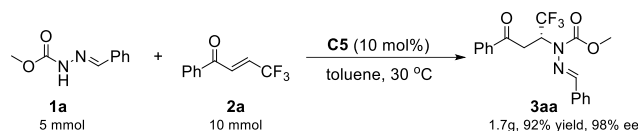

(*E*)-methyl 2-benzylidenehydrazinecarboxylate **1a** (0.89 g, 5 mmol) and **C5** (200 mg, 0.5 mmol) were dissolved in toluene (25 mL) at 30 °C, the (*E*)-4,4,4-trifluoro-1-phenylbut-2-en-1-one **2a** (2 g, 10 mmol) was added and stirred for 28 h until the reaction was completed, as monitored by TLC analysis. The residue was purified by flash chromatography on silica gel with petroleum ether/ethyl acetate (3:1) to afford **3aa** in 92% yield with 98% ee.

### 5.2 General experimental procedure for transforming **3aa** to **5aa**

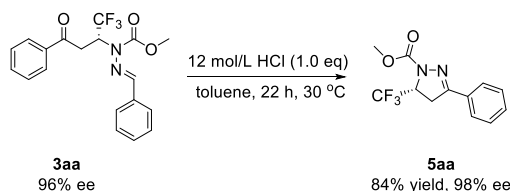

HCl (8.3  $\mu$ L, 12 mol/L, 1.0 eq) was added to a solution of **5aa** (37.8 mg, 0.1 mmol) in toluene at 30 °C. After stirring at the same temperature for 22 hours, the mixture was removed under reduced pressure. Then the residue was purified by silica gel chromatography (PE/EA = 10/1-5/1) to afford compound **10aa** as a white solid in 84% yield and 98% ee.

### 5.3 One-pot strategy for the synthesis of **5** from **1** and **2**

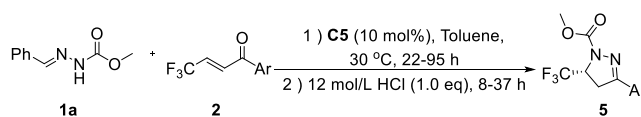

(*E*)-methyl 2-benzylidenehydrazinecarboxylate **1a** (0.1 mmol, 1.0 eq) and **C5** (4 mg, 0.1 eq) were dissolved in toluene (0.5 mL) at 30 °C, the  $\beta$ -trifluoromethyl- $\alpha,\beta$ -



unsaturated ketone **2** (0.2 mmol, 2.0 eq) was added and stirred for 22–95 h. The resulting mixture was monitored by TLC. Upon complete consumption of (*E*)-methyl 2-benzylidenehydrazinecarboxylate **3a**, HCl (8.3  $\mu$ L, 1.0 eq) was added. The reaction mixture was stirred at the 30 °C for 8–37 h until the reaction was completed, as monitored by TLC analysis. The concentrated reaction residue was purified by flash column chromatography on silica gel to afford desired product **5**.

## 6. Control experiments

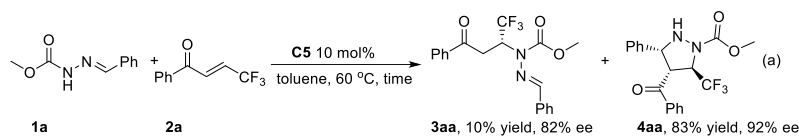

a) (*E*)-methyl 2-benzylidenehydrazinecarboxylate **1a** (17.8 g, 0.1 mmol) and **Cat 5** (4 mg, 0.01 mmol) were dissolved in toluene (0.5 mL) at 60 °C, the (*E*)-4,4,4-trifluoro-1-phenylbut-2-en-1-one **2a** (40 g, 0.2 mmol) was added and stirred for 96 h. The reaction mixture was directly loaded onto a short silica gel column, followed by gradient elution with PE/EA (10/1-3/1). Removing the solvent in vacuo, afforded products **3aa** (10% yield, 82% ee) and **4aa** (83% yield, 92% ee).

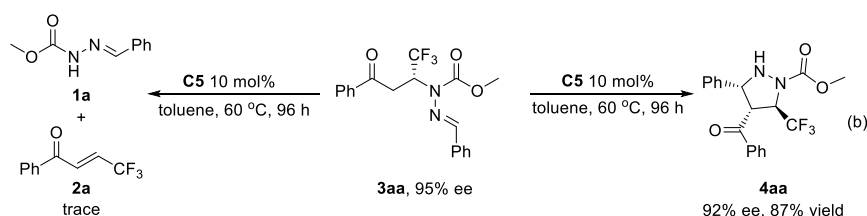

b) **3aa** (0.1 mmol, 1.0 eq), **C5** (4.0 mg, 0.1 eq) were dissolved in toluene (0.5 mL) at 60 °C. After stirring at the same temperature for 96 h, the mixture was removed under reduced pressure. Then the residue was purified by silica gel chromatography (PE/EA = 20/1 - 3/1) to afford compound **4aa** (87% yield, 92% ee), **1a** (trace) and **2a** (trace).

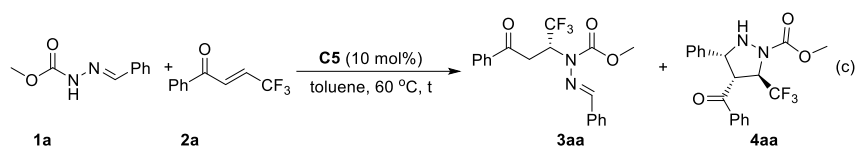

c) (*E*)-methyl 2-benzylidenehydrazinecarboxylate **1a** (17.8 g, 0.1 mmol) and **C5** (4 mg, 0.01 mmol) were dissolved in toluene (0.5 mL) at 60 °C, the (*E*)-4,4,4-trifluoro-1-phenylbut-2-en-1-one **2a** (40 g, 0.2 mmol) was added and stirred for 96 h. With the passage of reaction time, the ee of products **3aa** and **4aa** changed as shown in the table below.

| entry | reaction time | <b>3aa</b> | <b>4aa</b> |
|-------|---------------|------------|------------|
|-------|---------------|------------|------------|

|   | (h) | ee (%) <sup>b</sup> | ee (%) <sup>b</sup> | dr <sup>c</sup> |
|---|-----|---------------------|---------------------|-----------------|
| 1 | 2   | 96                  | N.D.                | N.D.            |
| 2 | 14  | 94                  | 96                  | >20:1           |
| 3 | 26  | 92                  | 95                  | >20:1           |
| 4 | 40  | 90                  | 95                  | >20:1           |
| 5 | 52  | 88                  | 94                  | >20:1           |
| 6 | 65  | 86                  | 94                  | >20:1           |
| 7 | 72  | 84                  | 93                  | >20:1           |
| 8 | 96  | 82                  | 92                  | >20:1           |

<sup>a</sup> Reaction conditions: **1a** (0.1 mmol), **C5** (0.01 mmol), **2a** (0.2 mmol), and solvent (0.5 mL). <sup>b</sup>

Determined by HPLC analysis on a chiral stationary phase. <sup>c</sup> The dr was determined by <sup>1</sup>H NMR analysis of the reaction mixture.

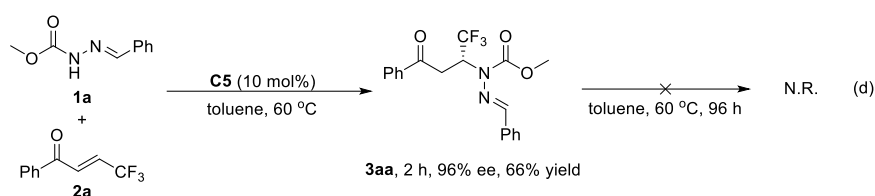

d) (*E*)-methyl 2-benzylidenehydrazinecarboxylate **1a** (17.8 g, 0.1 mmol) and **C5** (4 mg, 0.01 mmol) were dissolved in toluene (0.5 mL) at 60 °C, the (*E*)-4,4,4-trifluoro-1-phenylbut-2-en-1-one **2a** (40 g, 0.2 mmol) was added and stirred for 2 h. The resulting mixture was monitored by TLC and purified by silica gel column using eluent: PE:EA = 10:1 to afford **3aa** with 66 % yield and 96% ee. Subsequently, **3aa** (0.66 mmol, 1 eq) was dissolved in toluene (0.3 mL) at 60 °C. After stirring at the same temperature for 96 h, the mixture was removed under reduced pressure. Then the residue was purified by silica gel chromatography (PE/EA = 10/1) to recover the material **3aa**.

## 7. Cell Culture and Cytotoxicity (CCK-8) assay

HepG2, A549 and MCF-7 cells were cultured in DMEM. CFPAC-1 cells were cultured in IMDM. All cells were purchased from American Type Culture Collection (ATCC). Cells were cultured with 10% fetal bovine serum (FBS) at 37 °C in a humidified atmosphere with 5% CO<sub>2</sub>. And also added 1% penicillin-streptomycin solution (10 000 U/mL penicillin and 10 000 µg/mL streptomycin) to the culture medium in case of potential contamination. HepG2 ( $3.0 \times 10^3$  cells/well), A549 ( $3.0 \times 10^3$  cells/well), MCF-7 ( $3.0 \times 10^3$  cells/well), CFPAC-1 ( $5.0 \times 10^3$  cells/well) were seeded in 96-well tissue culture plates and cultured under 37 °C in a humidified atmosphere overnight. Cells were treated with various concentrations (3-50 µM) of each compound. After 48 h, cell viability was determined using CCK-8 assay according to the instruction manual. The reaction product of CCK-8 assay was measured at 450 nm and quantified using a Synergy Neo2 Multi-Mode Microplate Reader. Data were analyzed by GraphPad Prism 9.0. and presented as mean  $\pm$  SD of three independent experiments.

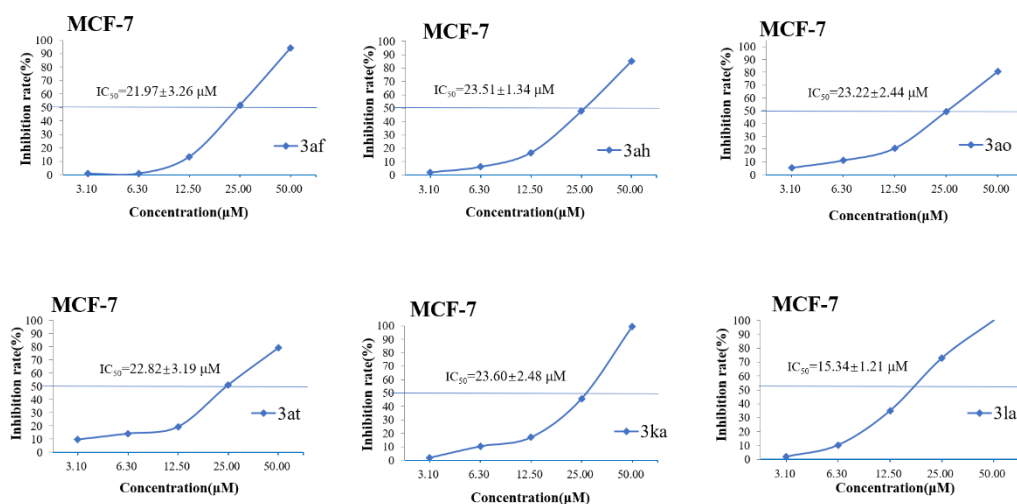

## 8. Determination of the absolute configuration of products 3la and 4aa

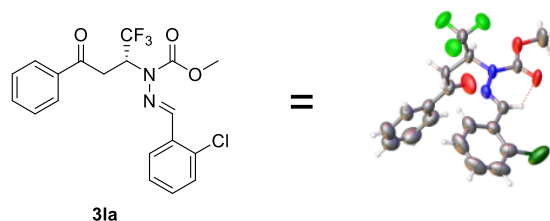

CCDC 2169815 (**3ia**) contains the supplementary crystallographic data for this paper. These data can be obtained free of charge from The Cambridge Crystallographic Data Centre via <https://www.ccdc.cam.ac.uk/structures/>.

*Displacement ellipsoids are drawn at the 50% probability level (solvent: PE/DCM = 2:1)*

**Table 1 Crystal data and structure refinement for 3la.**

|                                    |                                                                                                              |
|------------------------------------|--------------------------------------------------------------------------------------------------------------|
| Identification code                | 3la                                                                                                          |
| Empirical formula                  | C <sub>3.45</sub> H <sub>0.09</sub> Cl <sub>0.18</sub> F <sub>0.55</sub> N <sub>0.36</sub> O <sub>0.55</sub> |
| Formula weight                     | 72.21                                                                                                        |
| Temperature/K                      | 293(2)                                                                                                       |
| Crystal system                     | triclinic                                                                                                    |
| Space group                        | P-1                                                                                                          |
| a/Å                                | 7.9325(3)                                                                                                    |
| b/Å                                | 10.1011(2)                                                                                                   |
| c/Å                                | 12.3118(3)                                                                                                   |
| α/°                                | 98.974(2)                                                                                                    |
| β/°                                | 91.487(2)                                                                                                    |
| γ/°                                | 97.911(2)                                                                                                    |
| Volume/Å <sup>3</sup>              | 964.02(5)                                                                                                    |
| Z                                  | 11                                                                                                           |
| ρ <sub>calc</sub> /cm <sup>3</sup> | 1.368                                                                                                        |
| μ/mm <sup>-1</sup>                 | 2.220                                                                                                        |
| F(000)                             | 393.0                                                                                                        |
| Crystal size/mm <sup>3</sup>       | ? × ? × ?                                                                                                    |
| Radiation                          | CuKα (λ = 1.54184)                                                                                           |
| 2θ range for data collection/°     | 7.278 to 176.63                                                                                              |

|                                                |                                                               |
|------------------------------------------------|---------------------------------------------------------------|
| Index ranges                                   | $-9 \leq h \leq 9, -12 \leq k \leq 13, -14 \leq l \leq 15$    |
| Reflections collected                          | 33914                                                         |
| Independent reflections                        | 3817 [ $R_{\text{int}} = 0.0802, R_{\text{sigma}} = 0.0371$ ] |
| Data/restraints/parameters                     | 3817/0/254                                                    |
| Goodness-of-fit on $F^2$                       | 1.982                                                         |
| Final R indexes [ $I \geq 2\sigma(I)$ ]        | $R_1 = 0.0985, wR_2 = 0.2660$                                 |
| Final R indexes [all data]                     | $R_1 = 0.1170, wR_2 = 0.3020$                                 |
| Largest diff. peak/hole / $e \text{ \AA}^{-3}$ | 0.25/-0.59                                                    |

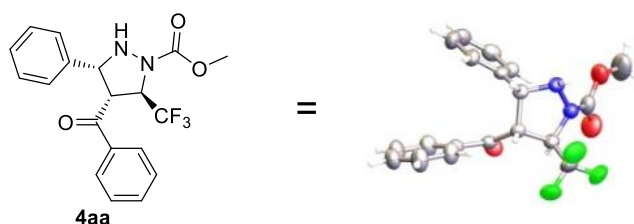

CCDC 2169816 (**4aa**) contains the supplementary crystallographic data for this paper. These data can be obtained free of charge from The Cambridge Crystallographic Data Centre via <https://www.ccdc.cam.ac.uk/structures/>.

*Displacement ellipsoids are drawn at the 50% probability level (solvent: PE/DCM = 2:1)*

**Table 1 Crystal data and structure refinement for 4aa.**

|                                  |                         |
|----------------------------------|-------------------------|
| Identification code              | 4aa                     |
| Empirical formula                | $C_{19}H_{17}F_3N_2O_3$ |
| Formula weight                   | 378.34                  |
| Temperature/K                    | 293(2)                  |
| Crystal system                   | monoclinic              |
| Space group                      | $P2_1$                  |
| $a/\text{\AA}$                   | 12.6089(2)              |
| $b/\text{\AA}$                   | 5.61820(10)             |
| $c/\text{\AA}$                   | 13.0437(2)              |
| $\alpha/^\circ$                  | 90                      |
| $\beta/^\circ$                   | 104.762(2)              |
| $\gamma/^\circ$                  | 90                      |
| Volume/ $\text{\AA}^3$           | 893.51(3)               |
| Z                                | 2                       |
| $\rho_{\text{calc}}/\text{cm}^3$ | 1.406                   |

|                                                |                                                               |
|------------------------------------------------|---------------------------------------------------------------|
| $\mu/\text{mm}^{-1}$                           | 1.001                                                         |
| F(000)                                         | 392.0                                                         |
| Crystal size/ $\text{mm}^3$                    | $0.03 \times 0.02 \times 0.01$                                |
| Radiation                                      | CuK $\alpha$ ( $\lambda = 1.54184$ )                          |
| $2\Theta$ range for data collection/ $^\circ$  | 7.008 to 169.064                                              |
| Index ranges                                   | $-15 \leq h \leq 15, -6 \leq k \leq 6, -16 \leq l \leq 16$    |
| Reflections collected                          | 23354                                                         |
| Independent reflections                        | 3255 [ $R_{\text{int}} = 0.0341, R_{\text{sigma}} = 0.0204$ ] |
| Data/restraints/parameters                     | 3255/1/245                                                    |
| Goodness-of-fit on $F^2$                       | 1.140                                                         |
| Final R indexes [ $I \geq 2\sigma(I)$ ]        | $R_1 = 0.0399, wR_2 = 0.1046$                                 |
| Final R indexes [all data]                     | $R_1 = 0.0443, wR_2 = 0.1082$                                 |
| Largest diff. peak/hole / $e \text{ \AA}^{-3}$ | 0.18/-0.17                                                    |
| Flack parameter                                | 0.10(7)                                                       |

## 9. Characterization data of the products

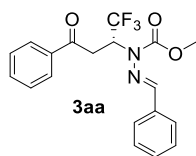

**(*R,E*)-methyl 2-benzylidene-1-(1,1,1-trifluoro-4-oxo-4-phenylbutan-2-yl)hydrazinecarboxylate (3aa):** White solid; 83% yield, 98% ee; m.p.: 42.5 – 42.9 °C;  $[\alpha]_D^{18} = 71.7$  (c 1.0, CHCl<sub>3</sub>); **HPLC** CHIRALPAK IF, n-Hexane/2-propanol = 90/10, flow rate = 1.0 mL/min,  $\lambda = 254$  nm, retention time: 5.855 min (major), 6.783 min (minor); **<sup>1</sup>H NMR** (600 MHz, CDCl<sub>3</sub>)  $\delta$  8.91 (s, 1H), 8.11 – 7.85 (m, 2H), 7.62 – 7.57 (m, 1H), 7.56 – 7.53 (m, 2H), 7.50 – 7.45 (m, 2H), 7.39 – 7.30 (m, 3H), 5.86 – 5.62 (m, 1H), 4.27 (dd, J = 17.6, 10.3 Hz, 1H), 3.92 (s, 3H), 3.25 (dd, J = 17.6, 3.2 Hz, 1H); **<sup>13</sup>C{<sup>1</sup>H} NMR** (150 MHz, CDCl<sub>3</sub>)  $\delta$  195.3, 155.9, 154.3, 136.4, 134.7, 133.8, 130.6, 128.9, 128.7, 128.3, 127.7, 125.2 (q, J = 281.1 Hz), 56.7 (q, J = 30.5 Hz), 53.8, 34.8; **<sup>19</sup>F{<sup>1</sup>H} NMR** (565 MHz, CDCl<sub>3</sub>)  $\delta$  -73.50; **HRMS** (ESI) calcd. for C<sub>19</sub>H<sub>17</sub>F<sub>3</sub>N<sub>2</sub>O<sub>3</sub>Na ([M+Na]<sup>+</sup>): 401.1083, found: 401.1074.

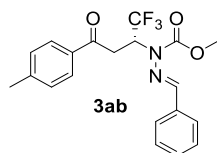

**(*R,E*)-methyl 2-benzylidene-1-(1,1,1-trifluoro-4-oxo-4-(p-tolyl)butan-2-yl)hydrazinecarboxylate (3ab):** White solid; 78% yield, 98% ee; m.p.: 40.4 – 41.3 °C;  $[\alpha]_D^{17} = 88.4$  (c 1.0, CHCl<sub>3</sub>); **HPLC** CHIRALPAK IF, n-Hexane/2-propanol = 90/10, flow rate = 1.0 mL/min,  $\lambda = 254$  nm, retention time: 6.187 min (major), 6.877 min (minor); **<sup>1</sup>H NMR** (400 MHz, CDCl<sub>3</sub>)  $\delta$  8.91 (s, 1H), 7.99 – 7.81 (m, 2H), 7.62 – 7.47 (m, 2H), 7.40 – 7.30 (m, 3H), 7.28 – 7.19 (m, 2H), 5.78 – 5.62 (m, 1H), 4.22 (dd, J = 17.5, 10.2 Hz, 1H), 3.91 (s, 3H), 3.21 (dd, J = 17.6, 3.2 Hz, 1H), 2.40 (s, 3H); **<sup>13</sup>C{<sup>1</sup>H} NMR** (100 MHz, CDCl<sub>3</sub>)  $\delta$  194.9, 155.8, 154.3, 144.7, 134.8, 134.0, 130.5, 129.6, 128.7, 128.4, 127.7, 125.3 (q, J = 281.0 Hz), 56.8 (q, J = 30.7 Hz), 53.8, 34.7, 21.8; **<sup>19</sup>F{<sup>1</sup>H} NMR** (376 MHz, CDCl<sub>3</sub>)  $\delta$  -73.44; **HRMS** (ESI) calcd. for C<sub>20</sub>H<sub>19</sub>F<sub>3</sub>N<sub>2</sub>O<sub>3</sub>Na ([M+Na]<sup>+</sup>): 415.1240, found: 415.1237.



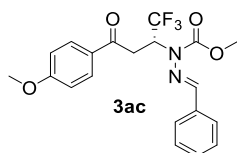

**(*R,E*)-methyl 2-benzylidene-1-(1,1,1-trifluoro-4-(4-methoxyphenyl)-4-oxobutan-2-yl)hydrazinecarboxylate (3ac):** White solid; 82% yield, 98% ee; m.p.: 65.0 – 65.6 °C;  $[\alpha]_D^{15} = 91.7$  (c 1.0, CHCl<sub>3</sub>); **HPLC** CHIRALPAK MD, n-Hexane/2-propanol = 90/10, flow rate = 1.0 mL/min,  $\lambda = 254$  nm, retention time: 7.017 min (major), 8.143 min (minor); **<sup>1</sup>H NMR** (400 MHz, CDCl<sub>3</sub>)  $\delta$  8.92 (s, 1H), 8.05 – 7.89 (m, 2H), 7.66 – 7.50 (m, 2H), 7.42 – 7.30 (m, 3H), 7.04 – 6.85 (m, 2H), 5.88 – 5.61 (m, 1H), 4.22 (dd, J = 17.5, 10.3 Hz, 1H), 3.91 (s, 3H), 3.86 (s, 3H), 3.19 (dd, J = 17.4, 3.2 Hz, 1H); **<sup>13</sup>C{<sup>1</sup>H} NMR** (100 MHz, CDCl<sub>3</sub>)  $\delta$  193.7, 164.0, 155.6, 154.3, 134.8, 130.6, 130.5, 129.5, 128.7, 127.7, 125.2 (q, J = 280.9 Hz), 114.0, 56.7 (q, J = 30.1 Hz), 55.6, 53.8, 34.4; **<sup>19</sup>F{<sup>1</sup>H} NMR** (376 MHz, CDCl<sub>3</sub>)  $\delta$  -73.42; **HRMS** (ESI) calcd. for C<sub>20</sub>H<sub>19</sub>F<sub>3</sub>N<sub>2</sub>O<sub>4</sub>Na ([M+Na]<sup>+</sup>): 431.1189, found: 431.1181.

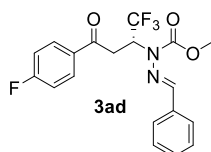

**(*R,E*)-methyl 2-benzylidene-1-(1,1,1-trifluoro-4-(4-fluorophenyl)-4-oxobutan-2-yl)hydrazinecarboxylate (3ad):** White solid; 66% yield, 97% ee; m.p.: 53.6 – 54.4 °C;  $[\alpha]_D^{15} = 91.7$  (c 1.0, CHCl<sub>3</sub>); **HPLC** CHIRALPAK OD-H, n-Hexane/2-propanol = 90/10, flow rate = 1.0 mL/min,  $\lambda = 254$  nm, retention time: 5.477 min (major), 6.772 min (minor); **<sup>1</sup>H NMR** (400 MHz, CDCl<sub>3</sub>)  $\delta$  8.90 (s, 1H), 8.13 – 7.91 (m, 2H), 7.61 – 7.46 (m, 2H), 7.43 – 7.29 (m, 3H), 7.20 – 7.07 (m, 2H), 5.81 – 5.62 (m, 1H), 4.23 (dd, J = 17.5, 10.3 Hz, 1H), 3.91 (s, 3H), 3.21 (dd, J = 17.5, 3.2 Hz, 1H); **<sup>13</sup>C{<sup>1</sup>H} NMR** (100 MHz, CDCl<sub>3</sub>)  $\delta$  193.7, 166.2 (d, J = 254.1 Hz), 156.2, 154.3, 134.7, 132.9 (d, J = 3.0 Hz), 131.0 (d, J = 9.2 Hz), 130.7, 128.7, 127.7, 125.2 (q, J = 281.1 Hz), 116.0 (d, J = 21.7 Hz), 56.7 (q, J = 30.4 Hz), 53.8, 34.7; **<sup>19</sup>F{<sup>1</sup>H} NMR** (376 MHz, CDCl<sub>3</sub>)  $\delta$  -73.54, -104.14; **HRMS** (ESI) calcd. for C<sub>19</sub>H<sub>16</sub>F<sub>4</sub>N<sub>2</sub>O<sub>3</sub>Na ([M+Na]<sup>+</sup>): 419.0989, found: 419.0982.

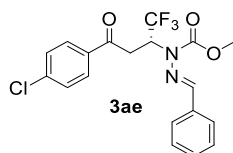

**(*R,E*)-methyl 2-benzylidene-1-(4-(4-chlorophenyl)-1,1,1-trifluoro-4-oxobutan-2-yl)hydrazinecarboxylate (3ae):** White solid; 66% yield, 96% ee; m.p.: 54.4 – 55.0 °C;  $[\alpha]_D^{18} = 55.9$  (c 1.0, CHCl<sub>3</sub>); **HPLC** CHIRALPAK MD, n-Hexane/2-propanol = 90/10, flow rate = 1.0 mL/min,  $\lambda = 254$  nm, retention time: 5.315 min (major), 5.930 min (minor); **<sup>1</sup>H NMR** (400 MHz, CDCl<sub>3</sub>)  $\delta$  8.89 (s, 1H), 7.99 – 7.87 (m, 2H), 7.59 – 7.49 (m, 2H), 7.49 – 7.42 (m, 2H), 7.40 – 7.29 (m, 3H), 5.79 – 5.62 (m, 1H), 4.22 (dd, J = 17.5, 10.3 Hz, 1H), 3.91 (s, 3H), 3.20 (dd, J = 17.5, 3.3 Hz, 1H); **<sup>13</sup>C{<sup>1</sup>H} NMR** (100 MHz, CDCl<sub>3</sub>)  $\delta$  194.1, 156.3, 154.3, 140.3, 134.8, 134.7, 130.7, 129.7, 129.2, 128.7, 127.7, 125.1 (q, J = 281.4 Hz), 56.7 (q, J = 30.9 Hz), 53.8, 34.7; **<sup>19</sup>F{<sup>1</sup>H} NMR** (376 MHz, CDCl<sub>3</sub>)  $\delta$  -73.55; **HRMS** (ESI) calcd. for C<sub>19</sub>H<sub>16</sub>ClF<sub>3</sub>N<sub>2</sub>O<sub>3</sub>Na ([M+Na]<sup>+</sup>): 435.0694, found: 435.0689.

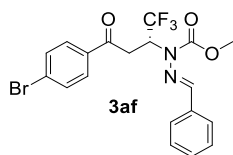

**(*R,E*)-methyl 2-benzylidene-1-(4-(4-bromophenyl)-1,1,1-trifluoro-4-oxobutan-2-yl)hydrazinecarboxylate (3af):** White solid; 65% yield, 97% ee; m.p.: 55.1 – 56.0 °C;  $[\alpha]_D^{18} = 69.2$  (c 1.0, CHCl<sub>3</sub>); **HPLC** CHIRALPAK IF, n-Hexane/2-propanol = 90/10, flow rate = 1.0 mL/min,  $\lambda = 254$  nm, retention time: 6.217 min (major), 6.840 min (minor); **<sup>1</sup>H NMR** (400 MHz, CDCl<sub>3</sub>)  $\delta$  8.88 (s, 1H), 7.98 – 7.77 (m, 2H), 7.66 – 7.56 (m, 2H), 7.57 – 7.49 (m, 2H), 7.41 – 7.31 (m, 3H), 5.80 – 5.61 (m, 1H), 4.21 (dd, J = 17.5, 10.3 Hz, 1H), 3.91 (s, 3H), 3.19 (dd, J = 17.5, 3.3 Hz, 1H); **<sup>13</sup>C{<sup>1</sup>H} NMR** (100 MHz, CDCl<sub>3</sub>)  $\delta$  194.3, 156.4, 154.3, 135.2, 134.6, 132.2, 130.7, 129.8, 129.1, 128.7, 127.7, 125.1 (q, J = 281.0 Hz), 56.7 (q, J = 30.5 Hz), 53.8, 34.7; **<sup>19</sup>F{<sup>1</sup>H} NMR** (376 MHz, CDCl<sub>3</sub>)  $\delta$  -73.56; **HRMS** (ESI) calcd. for C<sub>19</sub>H<sub>16</sub>BrF<sub>3</sub>N<sub>2</sub>O<sub>3</sub>Na ([M+Na]<sup>+</sup>): 479.0189, found: 479.0186.

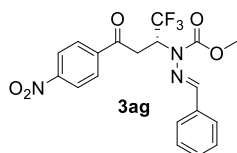

**(*R,E*)-methyl 2-benzylidene-1-(1,1,1-trifluoro-4-(4-nitrophenyl)-4-oxobutan-2-yl)hydrazinecarboxylate (3ag):** Colorless oil; 81% yield, 96% ee;  $[\alpha]_D^{17} = 95.4$  (c 1.0, CHCl<sub>3</sub>); **HPLC** CHIRALPAK MD, n-Hexane/2-propanol = 90/10, flow rate = 1.0 mL/min,  $\lambda = 254$  nm, retention time: 12.647 min (major), 11.640 min (minor); **<sup>1</sup>H NMR** (400 MHz, CDCl<sub>3</sub>)  $\delta$  8.88 (s, 1H), 8.39 – 8.23 (m, 2H), 8.21 – 8.07 (m, 2H), 7.58 – 7.47 (m, 2H), 7.42 – 7.28 (m, 3H), 5.79 – 5.65 (m, 1H), 4.29 (dd, J = 17.6, 10.3 Hz, 1H), 3.93 (s, 3H), 3.27 (dd, J = 17.6, 3.3 Hz, 1H); **<sup>13</sup>C{<sup>1</sup>H} NMR** (100 MHz, CDCl<sub>3</sub>)  $\delta$  194.0, 156.8, 154.3, 150.8, 140.8, 134.4, 130.9, 129.4, 128.8, 127.6, 125.0 (q, J = 280.9 Hz), 124.1, 56.7 (q, J = 31.0 Hz), 53.9, 35.3; **<sup>19</sup>F{<sup>1</sup>H} NMR** (376 MHz, CDCl<sub>3</sub>)  $\delta$  -73.65; **HRMS** (ESI) calcd. for C<sub>19</sub>H<sub>16</sub>F<sub>3</sub>N<sub>3</sub>O<sub>5</sub>Na ([M+Na]<sup>+</sup>): 446.0934, found: 446.0923.

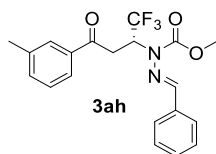

**(*R,E*)-methyl 2-benzylidene-1-(1,1,1-trifluoro-4-oxo-4-(m-tolyl)butan-2-yl)hydrazinecarboxylate (3ah):** White solid; 75% yield, 98% ee; m.p.: 37.1 – 37.5 °C;  $[\alpha]_D^{17} = 104.1$  (c 1.0, CHCl<sub>3</sub>); **HPLC** CHIRALPAK MD, n-Hexane/2-propanol = 90/10, flow rate = 1.0 mL/min,  $\lambda = 254$  nm, retention time: 4.460 min (major), 6.730 min (minor); **<sup>1</sup>H NMR** (400 MHz, CDCl<sub>3</sub>)  $\delta$  8.91 (s, 1H), 7.85 – 7.73 (m, 2H), 7.61 – 7.52 (m, 2H), 7.47 – 7.29 (m, 5H), 5.82 – 5.64 (m, 1H), 4.26 (dd, J = 17.6, 10.4 Hz, 1H), 3.92 (s, 3H), 3.21 (dd, J = 17.6, 3.2 Hz, 1H), 2.38 (s, 3H); **<sup>13</sup>C{<sup>1</sup>H} NMR** (100 MHz, CDCl<sub>3</sub>)  $\delta$  195.6, 155.8, 154.3, 138.7, 136.4, 134.7, 134.5, 130.6, 128.8, 128.7 (two peaks), 127.7, 125.5, 125.2 (q, J = 280.9 Hz), 56.7 (q, J = 30.6 Hz), 53.8, 34.8, 21.4; **<sup>19</sup>F{<sup>1</sup>H} NMR** (376 MHz, CDCl<sub>3</sub>)  $\delta$  -73.47; **HRMS** (ESI) calcd. for C<sub>20</sub>H<sub>19</sub>F<sub>3</sub>N<sub>2</sub>O<sub>3</sub>Na ([M+Na]<sup>+</sup>): 415.1240, found: 415.1233.

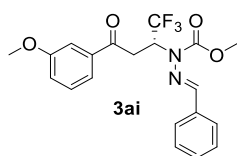

**(*R,E*)-methyl 2-benzylidene-1-(1,1,1-trifluoro-4-(3-methoxyphenyl)-4-oxobutan-2-yl)hydrazinecarboxylate (3ai):** Colorless oil; 77% yield, 98% ee;  $[\alpha]_D^{21} = 77.7$  (c 1.0, CHCl<sub>3</sub>); **HPLC** CHIRALPAK IB, n-Hexane/2-propanol = 90/10, flow rate = 1.0 mL/min,  $\lambda = 254$  nm, retention time: 5.057 min (major), 7.287 min (minor); **<sup>1</sup>H NMR** (400 MHz, CDCl<sub>3</sub>)  $\delta$  8.90 (s, 1H), 7.62 – 7.51 (m, 3H), 7.52 – 7.46 (m, 1H), 7.40 – 7.29 (m, 4H), 7.17 – 7.10 (m, 1H), 5.81 – 5.62 (m, 1H), 4.25 (dd, J = 17.6, 10.3 Hz, 1H), 3.92 (s, 3H), 3.83 (s, 3H), 3.23 (dd, J = 17.6, 3.2 Hz, 1H); **<sup>13</sup>C{<sup>1</sup>H} NMR** (100 MHz, CDCl<sub>3</sub>)  $\delta$  195.2, 160.1, 156.0, 154.3, 137.8, 134.7, 130.6, 129.9, 128.7, 127.7, 125.2 (q, J=280.1 Hz), 121.0, 120.5, 112.3, 56.7 (q, J=30.6 Hz), 55.6, 53.8, 34.9; **<sup>19</sup>F{<sup>1</sup>H} NMR** (376 MHz, CDCl<sub>3</sub>)  $\delta$  -73.51; **HRMS** (ESI) calcd. for C<sub>20</sub>H<sub>19</sub>F<sub>3</sub>N<sub>2</sub>O<sub>4</sub>Na ([M+Na]<sup>+</sup>): 431.1189, found: 431.1188.

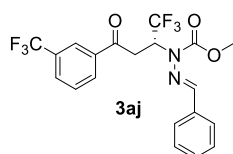

**(*R,E*)-methyl 2-benzylidene-1-(1,1,1-trifluoro-4-oxo-4-(3-(trifluoromethyl)phenyl)butan-2-yl)hydrazinecarboxylate (3aj):** Colorless oil; 77% yield, 98% ee;  $[\alpha]_D^{21} = 76.8$  (c 1.0, CHCl<sub>3</sub>); **HPLC** CHIRALPAK MD, n-Hexane/2-propanol = 90/10, flow rate = 1.0 mL/min,  $\lambda = 254$  nm, retention time: 4.813 min (major), 5.803 min (minor); **<sup>1</sup>H NMR** (400 MHz, CDCl<sub>3</sub>)  $\delta$  8.88 (s, 1H), 8.24 (s, 1H), 8.17 (d, J = 7.9 Hz, 1H), 7.85 (d, J = 7.8 Hz, 1H), 7.62 (t, J = 7.8 Hz, 1H), 7.56 – 7.49 (m, 2H), 7.42 – 7.29 (m, 3H), 5.84 – 5.55 (m, 1H), 4.30 (dd, J = 17.5, 10.4 Hz, 1H), 3.92 (s, 3H), 3.23 (dd, J = 17.5, 3.3 Hz, 1H); **<sup>13</sup>C{<sup>1</sup>H} NMR** (100 MHz, CDCl<sub>3</sub>)  $\delta$  194.2, 156.7, 154.3, 137.0, 134.5, 131.7 (q, J=32.6 Hz), 131.5, 130.8, 130.2 (q, J=3.6 Hz), 130.0, 128.8, 127.7, 125.2 (q, J=4.2 Hz), 125.1 (q, J=280.9 Hz), 122.4, 56.7 (q, J=30.9 Hz), 53.9, 34.8; **<sup>19</sup>F{<sup>1</sup>H} NMR** (376 MHz, CDCl<sub>3</sub>)  $\delta$  -62.87, -73.61; **HRMS** (ESI) calcd. for C<sub>20</sub>H<sub>16</sub>F<sub>6</sub>N<sub>2</sub>O<sub>3</sub>Na ([M+Na]<sup>+</sup>): 469.0957, found: 469.0952.

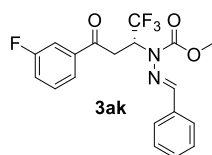

**(*R,E*)-methyl 2-benzylidene-1-(1,1,1-trifluoro-4-(3-fluorophenyl)-4-oxobutan-2-yl)hydrazinecarboxylate (3ak):** White solid; 61% yield, 96% ee; m.p.: 44.1 – 44.5 °C;  $[\alpha]_D^{17} = 103.1$  (c 1.0, CHCl<sub>3</sub>); **HPLC** CHIRALPAK IF, n-Hexane/2-propanol = 90/10, flow rate = 1.0 mL/min,  $\lambda = 254$  nm, retention time: 5.450 min (major), 6.022 min (minor); **<sup>1</sup>H NMR** (400 MHz, CDCl<sub>3</sub>)  $\delta$  8.89 (s, 1H), 7.86 – 7.73 (m, 1H), 7.71 – 7.62 (m, 1H), 7.59 – 7.51 (m, 2H), 7.49 – 7.40 (m, 1H), 7.39 – 7.27 (m, 4H), 5.78 – 5.63 (m, 1H), 4.23 (dd, J = 17.6, 10.2 Hz, 1H), 3.92 (s, 3H), 3.22 (dd, J = 17.6, 3.3 Hz, 1H); **<sup>13</sup>C{<sup>1</sup>H} NMR** (100 MHz, CDCl<sub>3</sub>)  $\delta$  194.1 (d, J = 2.2 Hz), 164.1 (d, J = 247.0 Hz), 156.3, 154.3, 138.5 (d, J = 5.9 Hz), 134.7, 130.7, 130.6 (d, J = 7.8 Hz), 128.7, 127.7, 125.1 (q, J = 280.9 Hz), 124.1 (d, J = 3.1 Hz), 120.8 (d, J = 21.6 Hz), 115.1 (d, J = 22.3 Hz), 56.7 (q, J = 30.5 Hz), 53.8, 35.0; **<sup>19</sup>F{<sup>1</sup>H} NMR** (376 MHz, CDCl<sub>3</sub>)  $\delta$  -73.57, -111.40; **HRMS** (ESI) calcd. for C<sub>19</sub>H<sub>16</sub>F<sub>4</sub>N<sub>2</sub>O<sub>3</sub>Na ([M+Na]<sup>+</sup>): 419.0989, found: 419.0985.

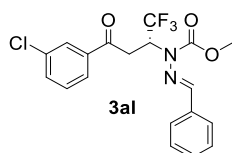

**(*R,E*)-methyl 2-benzylidene-1-(4-(3-chlorophenyl)-1,1,1-trifluoro-4-oxobutan-2-yl)hydrazinecarboxylate (3al):** Colorless oil; 57% yield, 95% ee;  $[\alpha]_D^{17} = 105.7$  (c 1.0, CHCl<sub>3</sub>); **HPLC** CHIRALPAK OD-H, n-Hexane/2-propanol = 90/10, flow rate = 1.0 mL/min,  $\lambda = 254$  nm, retention time: 5.082 min (major), 9.600 min (minor); **<sup>1</sup>H NMR** (400 MHz, CDCl<sub>3</sub>)  $\delta$  8.89 (s, 1H), 8.02 – 7.92 (m, 1H), 7.91 – 7.82 (m, 1H), 7.61 – 7.51 (m, 3H), 7.48 – 7.30 (m, 4H), 5.85 – 5.60 (m, 1H), 4.23 (dd, J = 17.5, 10.4 Hz, 1H), 3.92 (s, 3H), 3.20 (dd, J = 17.6, 3.2 Hz, 1H); **<sup>13</sup>C{<sup>1</sup>H} NMR** (100 MHz, CDCl<sub>3</sub>)  $\delta$  194.2, 156.6, 154.3, 138.0, 135.3, 134.6, 133.7, 130.7, 130.2, 128.8, 128.5, 127.7, 126.4, 125.1 (q, J = 281.1 Hz), 56.7 (q, J = 30.6 Hz), 53.9, 34.9; **<sup>19</sup>F{<sup>1</sup>H} NMR** (376 MHz, CDCl<sub>3</sub>)  $\delta$  -73.57; **HRMS** (ESI) calcd. for C<sub>19</sub>H<sub>16</sub>ClF<sub>3</sub>N<sub>2</sub>O<sub>3</sub>Na ([M+Na]<sup>+</sup>): 435.0694, found: 435.0694.

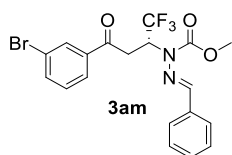

**(*R,E*)-methyl 2-benzylidene-1-(4-(3-bromophenyl)-1,1,1-trifluoro-4-oxobutan-2-yl)hydrazinecarboxylate (3am):** Colorless oil; 64% yield, 98% ee;  $[\alpha]_{\text{D}}^{22} = 69.1$  (c 1.0, CHCl<sub>3</sub>); **HPLC** CHIRALPAK IB, n-Hexane/2-propanol = 90/10, flow rate = 1.0 mL/min,  $\lambda = 254$  nm, retention time: 4.837 min (major), 6.720 min (minor); **<sup>1</sup>H NMR** (400 MHz, CDCl<sub>3</sub>)  $\delta$  8.88 (s, 1H), 8.17 – 8.03 (m, 1H), 7.95 – 7.85 (m, 1H), 7.75 – 7.67 (m, 1H), 7.60 – 7.51 (m, 2H), 7.40 – 7.32 (m, 4H), 5.86 – 5.45 (m, 1H), 4.22 (dd, J = 17.5, 10.4 Hz, 1H), 3.91 (s, 3H), 3.19 (dd, J = 17.5, 3.3 Hz, 1H); **<sup>13</sup>C{<sup>1</sup>H} NMR** (100 MHz, CDCl<sub>3</sub>)  $\delta$  194.1, 156.6, 154.3, 138.2, 136.6, 134.6, 131.4, 130.7, 130.5, 128.8, 127.7, 126.8, 125.1 (q, J = 281.1 Hz), 123.3, 56.7 (q, J = 30.9 Hz), 53.9, 34.8; **<sup>19</sup>F{<sup>1</sup>H} NMR** (376 MHz, CDCl<sub>3</sub>)  $\delta$  -73.57; **HRMS** (ESI) calcd. for C<sub>19</sub>H<sub>16</sub>BrF<sub>3</sub>N<sub>2</sub>O<sub>3</sub>Na ([M+Na]<sup>+</sup>): 479.0189, found: 479.0183.

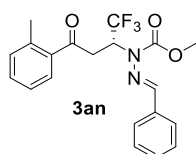

**(*R,E*)-methyl 2-benzylidene-1-(1,1,1-trifluoro-4-oxo-4-(*o*-tolyl)butan-2-yl)hydrazinecarboxylate (3an):** Colorless oil; 87% yield, 97% ee;  $[\alpha]_{\text{D}}^{18} = 141.6$  (c 1.0, CHCl<sub>3</sub>); **HPLC** CHIRALPAK OD-H, n-Hexane/2-propanol = 90/10, flow rate = 1.0 mL/min,  $\lambda = 254$  nm, retention time: 13.827 min (major), 15.425 min (minor); **<sup>1</sup>H NMR** (400 MHz, CDCl<sub>3</sub>)  $\delta$  8.90 (s, 1H), 7.77 – 7.62 (m, 1H), 7.57 – 7.47 (m, 2H), 7.43 – 7.28 (m, 4H), 7.27 – 7.18 (m, 2H), 5.76 – 5.60 (m, 1H), 4.12 (dd, J = 17.2, 10.4 Hz, 1H), 3.90 (s, 3H), 3.20 (dd, J = 17.2, 3.7 Hz, 1H), 2.42 (s, 3H); **<sup>13</sup>C{<sup>1</sup>H} NMR** (100 MHz, CDCl<sub>3</sub>)  $\delta$  198.8, 156.3, 154.4, 138.6, 137.4, 134.7, 132.2, 131.9, 130.6, 128.7, 128.6, 127.7, 125.9, 125.2 (q, J = 281.3 Hz), 57.1 (q, J = 30.5 Hz), 53.9, 37.6, 21.2; **<sup>19</sup>F{<sup>1</sup>H} NMR** (376 MHz, CDCl<sub>3</sub>)  $\delta$  -73.65; **HRMS** (ESI) calcd. for C<sub>20</sub>H<sub>19</sub>F<sub>3</sub>N<sub>2</sub>O<sub>3</sub>Na ([M+Na]<sup>+</sup>): 415.1240, found: 415.1239.

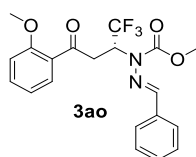

**(*R,E*)-methyl 2-benzylidene-1-(1,1,1-trifluoro-4-(2-methoxyphenyl)-4-oxobutan-2-yl)hydrazinecarboxylate (3ao):** Colorless oil; 78% yield, 97% ee;  $[\alpha]_{\text{D}}^{16} = 79.4$  (c 1.0,

CHCl<sub>3</sub>); **HPLC** CHIRALPAK MD, n-Hexane/2-propanol = 90/10, flow rate = 1.0 mL/min, λ = 254 nm, retention time: 6.180 min (major), 7.407 min (minor); **<sup>1</sup>H NMR** (400 MHz, CDCl<sub>3</sub>) δ 8.90 (s, 1H), 7.85 – 7.62 (m, 1H), 7.57 – 7.51 (m, 2H), 7.52 – 7.43 (m, 1H), 7.39 – 7.27 (m, 3H), 7.04 – 6.90 (m, 2H), 5.73 – 5.61 (m, 1H), 4.15 (dd, J = 18.0, 10.3 Hz, 1H), 3.90 (s, 3H), 3.87 (s, 3H), 3.38 (dd, J = 18.0, 3.4 Hz, 1H); **<sup>13</sup>C{<sup>1</sup>H} NMR** (100 MHz, CDCl<sub>3</sub>) δ 197.2, 158.7, 155.4, 154.3, 134.9, 134.2, 130.8, 130.4, 128.6, 127.7, 127.4, 125.2 (q, J = 280.9 Hz), 120.9, 111.6, 56.9 (q, J = 30.3 Hz), 55.7, 53.7, 40.0; **<sup>19</sup>F{<sup>1</sup>H} NMR** (376 MHz, CDCl<sub>3</sub>) δ -73.49; **HRMS** (ESI) calcd. for C<sub>20</sub>H<sub>19</sub>F<sub>3</sub>N<sub>2</sub>O<sub>4</sub>Na ([M+Na]<sup>+</sup>): 431.1189, found: 431.1188.

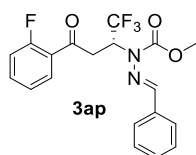

**(R,E)-methyl 2-benzylidene-1-(1,1,1-trifluoro-4-(2-fluorophenyl)-4-oxobutan-2-yl)hydrazinecarboxylate (3ap)**: Colorless oil; 63% yield, 89% ee; [α]<sub>D</sub><sup>17</sup> = 101.6 (c 1.0, CHCl<sub>3</sub>); **HPLC** CHIRALPAK IF, n-Hexane/2-propanol = 90/10, flow rate = 1.0 mL/min, λ = 254 nm, retention time: 5.373 min (major), 6.035 min (minor); **<sup>1</sup>H NMR** (400 MHz, CDCl<sub>3</sub>) δ 8.90 (s, 1H), 7.92 – 7.74 (m, 1H), 7.61 – 7.46 (m, 3H), 7.40 – 7.26 (m, 3H), 7.25 – 7.10 (m, 2H), 5.79 – 5.46 (m, 1H), 4.32 – 4.08 (m, 1H), 3.91 (s, 3H), 3.46 – 3.16 (m, 1H); **<sup>13</sup>C{<sup>1</sup>H} NMR** (100 MHz, CDCl<sub>3</sub>) δ 193.5 (d, J = 3.9 Hz), 162.2 (d, J = 252.9 Hz), 156.0, 154.4, 135.2 (d, J = 8.9 Hz), 134.8, 130.9 (d, J = 2.7 Hz), 130.6, 128.7, 127.7, 125.2 (d, J = 12.8 Hz), 125.1 (q, J = 280.9 Hz), 124.8 (d, J = 3.6 Hz), 116.9 (d, J = 23.7 Hz), 56.6 (q, J = 30.0 Hz), 53.8, 39.5 (d, J = 8.8 Hz); **<sup>19</sup>F{<sup>1</sup>H} NMR** (376 MHz, CDCl<sub>3</sub>) δ -73.65, -109.22; **HRMS** (ESI) calcd. for C<sub>19</sub>H<sub>16</sub>F<sub>4</sub>N<sub>2</sub>O<sub>3</sub>Na ([M+Na]<sup>+</sup>): 419.0989, found: 419.0993.

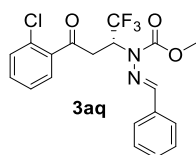

**(R,E)-methyl 2-benzylidene-1-(4-(2-chlorophenyl)-1,1,1-trifluoro-4-oxobutan-2-yl)hydrazinecarboxylate (3aq)**: Colorless oil; 72% yield, 94% ee; [α]<sub>D</sub><sup>19</sup> = 39.9 (c 1.0, CHCl<sub>3</sub>); **HPLC** CHIRALPAK OD-H, n-Hexane/2-propanol = 90/10, flow rate = 1.0

mL/min,  $\lambda = 254$  nm, retention time: 6.208 min (major), 6.748 min (minor);  $^1\text{H NMR}$  (400 MHz,  $\text{CDCl}_3$ )  $\delta$  8.90 (s, 1H), 7.61 – 7.43 (m, 3H), 7.43 – 7.18 (m, 6H), 5.76 – 5.53 (m, 1H), 4.14 (dd,  $J = 17.6, 10.4$  Hz, 1H), 3.88 (s, 3H), 3.35 (dd,  $J = 17.6, 3.6$  Hz, 1H);  $^{13}\text{C}\{^1\text{H}\}$  NMR (100 MHz,  $\text{CDCl}_3$ )  $\delta$  198.1, 156.2, 154.2, 138.5, 134.7, 132.4, 131.3, 130.7 (two peaks), 129.7, 128.7, 127.7, 127.2, 125.0 (q,  $J = 281.4$  Hz), 57.0 (q,  $J = 31.0$  Hz), 53.8, 39.2;  $^{19}\text{F}\{^1\text{H}\}$  NMR (376 MHz,  $\text{CDCl}_3$ )  $\delta$  -73.70; HRMS (ESI) calcd. for  $\text{C}_{19}\text{H}_{16}\text{ClF}_3\text{N}_2\text{O}_3\text{Na}$  ( $[\text{M}+\text{Na}]^+$ ): 435.0694, found: 435.0687.

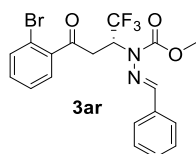

**(*R,E*)-methyl 2-benzylidene-1-(4-(2-bromophenyl)-1,1,1-trifluoro-4-oxobutan-2-yl)hydrazinecarboxylate (3ar):** White solid; 75% yield, 95% ee; m.p.: 41.2 – 42.0 °C;  $[\alpha]_{\text{D}}^{17} = 86.5$  (c 1.0,  $\text{CHCl}_3$ ); HPLC CHIRALPAK IF, n-Hexane/2-propanol = 90/10, flow rate = 1.0 mL/min,  $\lambda = 254$  nm, retention time: 5.820 min (major), 6.517 min (minor);  $^1\text{H NMR}$  (400 MHz,  $\text{CDCl}_3$ )  $\delta$  8.94 (s, 1H), 7.64 – 7.50 (m, 3H), 7.45 – 7.21 (m, 6H), 5.74 – 5.55 (m, 1H), 4.12 (dd,  $J = 17.6, 10.4$  Hz, 1H), 3.89 (s, 3H), 3.35 (dd,  $J = 17.6, 3.6$  Hz, 1H);  $^{13}\text{C}\{^1\text{H}\}$  NMR (100 MHz,  $\text{CDCl}_3$ )  $\delta$  198.9, 156.1, 154.2, 140.8, 134.7, 134.0, 132.2, 130.7, 129.3, 128.7, 127.7, 127.6, 124.9 (q,  $J = 281.4$  Hz), 118.9, 56.9 (q,  $J = 30.9$  Hz), 53.8, 39.0;  $^{19}\text{F}\{^1\text{H}\}$  NMR (376 MHz,  $\text{CDCl}_3$ )  $\delta$  -73.64; HRMS (ESI) calcd. for  $\text{C}_{19}\text{H}_{16}\text{BrF}_3\text{N}_2\text{O}_3\text{Na}$  ( $[\text{M}+\text{Na}]^+$ ): 479.0189, found: 479.0187.

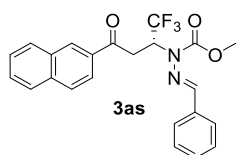

**(*R,E*)-methyl 2-benzylidene-1-(1,1,1-trifluoro-4-(naphthalen-2-yl)-4-oxobutan-2-yl)hydrazinecarboxylate (3as):** White solid; 66% yield, 98% ee; m.p.: 79.9 – 80.3 °C;  $[\alpha]_{\text{D}}^{16} = 44.0$  (c 1.0,  $\text{CHCl}_3$ ); HPLC CHIRALPAK MD, n-Hexane/2-propanol = 90/10, flow rate = 1.0 mL/min,  $\lambda = 254$  nm, retention time: 5.743 min (major), 8.340 min (minor);  $^1\text{H NMR}$  (400 MHz,  $\text{CDCl}_3$ )  $\delta$  8.90 (s, 1H), 8.59 – 8.43 (m, 1H), 8.14 – 7.98 (m, 1H), 7.95 – 7.83 (m, 3H), 7.68 – 7.56 (m, 1H), 7.57 – 7.50 (m, 3H), 7.39 – 7.30 (m, 3H), 5.85 – 5.67 (m, 1H), 4.42 (dd,  $J = 17.4, 10.4$  Hz, 1H), 3.92 (s, 3H), 3.33 (dd,  $J =$



17.4, 3.2 Hz, 1H);  $^{13}\text{C}\{^1\text{H}\}$  NMR (100 MHz,  $\text{CDCl}_3$ )  $\delta$  195.3, 156.0, 154.4, 135.9, 134.7, 133.8, 132.5, 130.6, 130.3, 129.7, 128.9, 128.8, 128.7, 127.9, 127.7, 127.1, 125.2 (q,  $J = 281.2$  Hz), 123.8, 56.7 (q,  $J = 30.6$  Hz), 53.8, 34.8;  $^{19}\text{F}\{^1\text{H}\}$  NMR (376 MHz,  $\text{CDCl}_3$ )  $\delta$  -73.40; HRMS (ESI) calcd. for  $\text{C}_{23}\text{H}_{19}\text{F}_3\text{N}_2\text{O}_3\text{Na}$  ( $[\text{M}+\text{Na}]^+$ ): 451.1240, found: 451.1238.

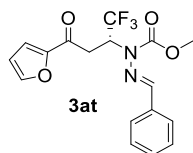

**(*R,E*)-methyl 2-benzylidene-1-(1,1,1-trifluoro-4-(furan-2-yl)-4-oxobutan-2-yl)hydrazinecarboxylate (3at):** White solid; 73% yield, 98% ee; m.p.: 124.4 – 124.8 °C;  $[\alpha]_{\text{D}}^{22} = 94.8$  (c 1.0,  $\text{CHCl}_3$ ); HPLC CHIRALPAK IF, n-Hexane/2-propanol = 90/10, flow rate = 1.0 mL/min,  $\lambda = 254$  nm, retention time: 6.873 min (major), 8.473 min (minor);  $^1\text{H}$  NMR (400 MHz,  $\text{CDCl}_3$ )  $\delta$  8.91 (s, 1H), 7.66 – 7.52 (m, 3H), 7.41 – 7.32 (m, 3H), 7.29 – 7.15 (m, 1H), 6.53 (dd,  $J = 3.7, 1.7$  Hz, 1H), 5.89 – 5.46 (m, 1H), 4.10 (dd,  $J = 17.3, 10.4$  Hz, 1H), 3.88 (s, 3H), 3.14 (dd,  $J = 17.3, 3.5$  Hz, 1H);  $^{13}\text{C}\{^1\text{H}\}$  NMR (100 MHz,  $\text{CDCl}_3$ )  $\delta$  184.2, 155.9, 154.2, 152.4, 146.9, 134.8, 130.6, 128.7, 127.7, 125.0 (q,  $J = 281.0$  Hz), 117.9, 112.7, 56.4 (q,  $J = 30.8$  Hz), 53.8, 34.8;  $^{19}\text{F}\{^1\text{H}\}$  NMR (376 MHz,  $\text{CDCl}_3$ )  $\delta$  -73.52; HRMS (ESI) calcd. for  $\text{C}_{17}\text{H}_{15}\text{F}_3\text{N}_2\text{O}_4\text{Na}$  ( $[\text{M}+\text{Na}]^+$ ): 391.0876, found: 391.0873.

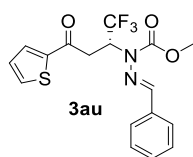

**(*R,E*)-methyl 2-benzylidene-1-(1,1,1-trifluoro-4-oxo-4-(thiophen-2-yl)butan-2-yl)hydrazinecarboxylate (3au):** White solid; 75% yield, 98% ee; m.p.: 120.1 – 120.5 °C;  $[\alpha]_{\text{D}}^{17} = 68.7$  (c 1.0,  $\text{CHCl}_3$ ); HPLC CHIRALPAK IB, n-Hexane/2-propanol = 90/10, flow rate = 1.0 mL/min,  $\lambda = 254$  nm, retention time: 5.507 min (major), 7.887 min (minor);  $^1\text{H}$  NMR (400 MHz,  $\text{CDCl}_3$ )  $\delta$  8.92 (s, 1H), 7.86 – 7.74 (m, 1H), 7.71 – 7.62 (m, 1H), 7.61 – 7.54 (m, 2H), 7.43 – 7.31 (m, 3H), 7.19 – 7.06 (m, 1H), 5.76 – 5.61 (m, 1H), 4.16 (dd,  $J = 17.1, 10.3$  Hz, 1H), 3.89 (s, 3H), 3.22 (dd,  $J = 17.1, 3.3$  Hz, 1H);  $^{13}\text{C}\{^1\text{H}\}$  NMR (100 MHz,  $\text{CDCl}_3$ )  $\delta$  188.0, 156.0, 154.2, 143.5, 134.8, 134.5, 132.7,

130.6, 128.7, 128.4, 127.7, 125.0 (q, J =281.5 Hz), 56.7 (q, J =30.5 Hz), 53.8, 35.6;  $^{19}\text{F}\{^1\text{H}\}$  NMR (376 MHz,  $\text{CDCl}_3$ )  $\delta$  -73.40; HRMS (ESI) calcd. for  $\text{C}_{17}\text{H}_{15}\text{F}_3\text{N}_2\text{O}_3\text{SNa}$  ( $[\text{M}+\text{Na}]^+$ ): 407.0648, found: 407.0647.

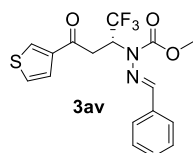

**(R,E)-methyl 2-benzylidene-1-(1,1,1-trifluoro-4-oxo-4-(thiophen-3-yl)butan-2-yl)hydrazinecarboxylate (3av):** White solid; 75% yield, 99% ee; m.p.: 134.2 – 134.9 °C;  $[\alpha]_D^{18} = 113.1$  (c 1.0,  $\text{CHCl}_3$ ); HPLC CHIRALPAK OJ-H, n-Hexane/2-propanol = 70/30, flow rate = 1.0 mL/min,  $\lambda = 254$  nm, retention time: 12.530 min (major), 9.630 min (minor);  $^1\text{H}$  NMR (400 MHz,  $\text{CDCl}_3$ )  $\delta$  8.91 (s, 1H), 8.20 – 8.06 (m, 1H), 7.69 – 7.49 (m, 3H), 7.45 – 7.29 (m, 4H), 5.76 – 5.59 (m, 1H), 4.13 (dd, J = 17.3, 10.2 Hz, 1H), 3.90 (s, 3H), 3.19 (dd, J = 17.3, 3.3 Hz, 1H);  $^{13}\text{C}\{^1\text{H}\}$  NMR (100 MHz,  $\text{CDCl}_3$ )  $\delta$  189.4, 156.0, 154.3, 141.7, 134.8, 132.8, 130.6, 128.7, 127.7, 127.0, 126.9, 125.1 (q, J =281.0 Hz), 56.6 (q, J =30.7 Hz), 53.8, 36.0;  $^{19}\text{F}\{^1\text{H}\}$  NMR (376 MHz,  $\text{CDCl}_3$ )  $\delta$  -73.46; HRMS (ESI) calcd. for  $\text{C}_{17}\text{H}_{15}\text{F}_3\text{N}_2\text{O}_3\text{SNa}$  ( $[\text{M}+\text{Na}]^+$ ): 407.0648, found: 407.0645.

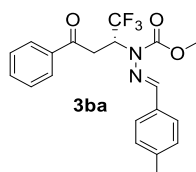

**(R,E)-methyl 2-(4-methylbenzylidene)-1-(1,1,1-trifluoro-4-oxo-4-phenylbutan-2-yl)hydrazinecarboxylate (3ba):** Colorless oil; 85% yield, 98% ee; m.p.:  $[\alpha]_D^{18} = 110.5$  (c 1.0,  $\text{CHCl}_3$ ); HPLC CHIRALPAK OD-H, n-Hexane/2-propanol = 90/10, flow rate = 1.0 mL/min,  $\lambda = 254$  nm, retention time: 4.793 min (major), 7.147 min (minor);  $^{13}\text{C}\{^1\text{H}\}$  NMR (100 MHz,  $\text{CDCl}_3$ )  $\delta$  195.3, 156.9, 154.4, 141.0, 136.4, 133.7, 131.9, 129.4, 128.9, 128.3, 127.7, 125.2 (q, J =281.4 Hz), 56.6 (q, J =30.5 Hz), 53.8, 34.7, 21.6;  $^1\text{H}$  NMR (400 MHz,  $\text{CDCl}_3$ )  $\delta$  8.82 (s, 1H), 8.09 – 7.92 (m, 2H), 7.64 – 7.55 (m, 1H), 7.52 – 7.39 (m, 4H), 7.17 – 7.09 (m, 2H), 5.82 – 5.65 (m, 1H), 4.26 (dd, J = 17.6, 10.3 Hz, 1H), 3.91 (s, 3H), 3.22 (dd, J = 17.6, 3.2 Hz, 1H), 2.35 (s, 3H);  $^{19}\text{F}\{^1\text{H}\}$  NMR

(376 MHz, CDCl<sub>3</sub>)  $\delta$  -73.51; **HRMS** (ESI) calcd. for C<sub>20</sub>H<sub>19</sub>F<sub>3</sub>N<sub>2</sub>O<sub>3</sub>Na ([M+Na]<sup>+</sup>): 415.1240, found: 415.1232.

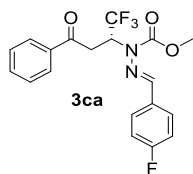

**(*R,E*)-methyl 2-(4-fluorobenzylidene)-1-(1,1,1-trifluoro-4-oxo-4-phenylbutan-2-yl)hydrazinecarboxylate (3ca):** Colorless oil; 75% yield, 96% ee; m.p.:  $[\alpha]_D^{19} = 53.0$  (c 1.0, CHCl<sub>3</sub>); **HPLC** CHIRALPAK OD-H, n-Hexane/2-propanol = 90/10, flow rate = 1.0 mL/min,  $\lambda = 254$  nm, retention time: 4.985 min (major), 8.240 min (minor); **<sup>1</sup>H NMR** (400 MHz, CDCl<sub>3</sub>)  $\delta$  8.88 (s, 1H), 8.05 – 7.92 (m, 2H), 7.67 – 7.56 (m, 1H), 7.55 – 7.43 (m, 4H), 7.10 – 6.92 (m, 2H), 5.79 – 5.55 (m, 1H), 4.23 (dd, J = 17.6, 10.3 Hz, 1H), 3.92 (s, 3H), 3.24 (dd, J = 17.6, 3.2 Hz, 1H); **<sup>13</sup>C{<sup>1</sup>H} NMR** (100 MHz, CDCl<sub>3</sub>)  $\delta$  195.2, 164.2 (d, J = 249.8 Hz), 154.7, 154.3, 136.4, 133.8, 131.0 (d, J = 2.9 Hz), 129.5 (d, J = 8.6 Hz), 128.9, 128.3, 125.2 (q, J = 281.0 Hz), 115.8 (d, J = 21.7 Hz), 56.7 (q, J = 30.4 Hz), 53.8, 34.7; **<sup>19</sup>F{<sup>1</sup>H} NMR** (376 MHz, CDCl<sub>3</sub>)  $\delta$  -73.55, -109.60; **HRMS** (ESI) calcd. for C<sub>19</sub>H<sub>16</sub>F<sub>4</sub>N<sub>2</sub>O<sub>3</sub>Na ([M+Na]<sup>+</sup>): 419.0989, found: 419.0981.

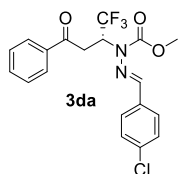

**(*R,E*)-methyl 2-(4-chlorobenzylidene)-1-(1,1,1-trifluoro-4-oxo-4-phenylbutan-2-yl)hydrazinecarboxylate (3da):** White solid; 75% yield, 96% ee; m.p.: 54.4 – 55.0 °C;  $[\alpha]_D^{18} = 42.2$  (c 1.0, CHCl<sub>3</sub>); **HPLC** CHIRALPAK OD-H, n-Hexane/2-propanol = 90/10, flow rate = 1.0 mL/min,  $\lambda = 254$  nm, retention time: 4.877 min (major), 8.593 min (minor); **<sup>1</sup>H NMR** (600 MHz, CDCl<sub>3</sub>)  $\delta$  8.92 (s, 1H), 8.04 – 7.95 (m, 2H), 7.68 – 7.56 (m, 1H), 7.52 – 7.42 (m, 4H), 7.31 – 7.25 (m, 2H), 5.82 – 5.59 (m, 1H), 4.23 (dd, J = 17.6, 10.3 Hz, 1H), 3.92 (s, 3H), 3.25 (dd, J = 17.6, 3.2 Hz, 1H); **<sup>13</sup>C{<sup>1</sup>H} NMR** (150 MHz, CDCl<sub>3</sub>)  $\delta$  195.2, 154.2, 153.9, 136.4 (two peaks), 133.9, 133.3, 129.0, 128.9, 128.7, 128.3, 125.1 (q, J = 281.1 Hz), 56.8 (q, J = 30.6 Hz), 53.9, 34.9; **<sup>19</sup>F{<sup>1</sup>H} NMR**

(565 MHz, CDCl<sub>3</sub>)  $\delta$  -73.55; **HRMS** (ESI) calcd. for C<sub>19</sub>H<sub>16</sub>ClF<sub>3</sub>N<sub>2</sub>O<sub>3</sub>Na ([M+Na]<sup>+</sup>): 435.0694, found: 435.0688.

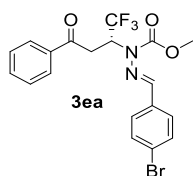

**(R,E)-methyl 2-(4-bromobenzylidene)-1-(1,1,1-trifluoro-4-oxo-4-phenylbutan-2-yl)hydrazinecarboxylate (3ea):** White solid; 70% yield, 96% ee; m.p.: 155.7 – 156.3 °C;  $[\alpha]_D^{17} = 115.4$  (c 1.0, CHCl<sub>3</sub>); **HPLC** CHIRALPAK OD-H, n-Hexane/2-propanol = 90/10, flow rate = 1.0 mL/min,  $\lambda = 254$  nm, retention time: 5.128 min (major), 8.813 min (minor); **<sup>1</sup>H NMR** (400 MHz, CDCl<sub>3</sub>)  $\delta$  8.91 (s, 1H), 8.09 – 7.91 (m, 2H), 7.71 – 7.55 (m, 1H), 7.53 – 7.40 (m, 4H), 7.42 – 7.33 (m, 2H), 5.77 – 5.64 (m, 1H), 4.23 (dd, J = 17.6, 10.3 Hz, 1H), 3.92 (s, 3H), 3.25 (dd, J = 17.6, 3.2 Hz, 1H); **<sup>13</sup>C{<sup>1</sup>H} NMR** (100 MHz, CDCl<sub>3</sub>)  $\delta$  195.2, 154.2, 153.8, 136.3, 133.9, 133.8, 131.9, 128.9 (two peaks), 128.3, 125.1 (q, J = 281.5 Hz), 124.8, 56.8 (q, J = 30.6 Hz), 53.9, 34.8; **<sup>19</sup>F{<sup>1</sup>H} NMR** (376 MHz, CDCl<sub>3</sub>)  $\delta$  -73.55; **HRMS** (ESI) calcd. for C<sub>19</sub>H<sub>16</sub>BrF<sub>3</sub>N<sub>2</sub>O<sub>3</sub>Na ([M+Na]<sup>+</sup>): 479.0189, found: 479.0177.

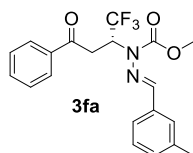

**(R,E)-methyl 2-(3-methylbenzylidene)-1-(1,1,1-trifluoro-4-oxo-4-phenylbutan-2-yl)hydrazinecarboxylate (3fa):** White solid; 75% yield, 98% ee; m.p.: 48.0 – 48.9 °C;  $[\alpha]_D^{18} = 107.4$  (c 1.0, CHCl<sub>3</sub>); **HPLC** CHIRALPAK OD-H, n-Hexane/2-propanol = 90/10, flow rate = 1.0 mL/min,  $\lambda = 254$  nm, retention time: 4.888 min (major), 8.178 min (minor); **<sup>1</sup>H NMR** (400 MHz, CDCl<sub>3</sub>)  $\delta$  8.82 (s, 1H), 8.08 – 7.94 (m, 2H), 7.65 – 7.54 (m, 1H), 7.53 – 7.43 (m, 2H), 7.37 – 7.29 (m, 2H), 7.24 – 7.12 (m, 2H), 5.81 – 5.66 (m, 1H), 4.27 (dd, J = 17.6, 10.4 Hz, 1H), 3.91 (s, 3H), 3.22 (dd, J = 17.5, 3.3 Hz, 1H), 2.28 (s, 3H); **<sup>13</sup>C{<sup>1</sup>H} NMR** (100 MHz, CDCl<sub>3</sub>)  $\delta$  195.3, 156.9, 154.4, 138.3, 136.5, 134.5, 133.7, 131.5, 131.1, 128.9, 128.9, 128.7, 128.3, 128.1, 127.0, 125.2 (q, J = 281.1 Hz), 125.1, 56.7 (q, J = 30.5 Hz), 53.8, 34.7, 21.4; **<sup>19</sup>F{<sup>1</sup>H} NMR** (376 MHz, CDCl<sub>3</sub>)  $\delta$

-73.59; **HRMS** (ESI) calcd. for  $C_{20}H_{19}F_3N_2O_3Na$  ( $[M+Na]^+$ ): 415.1240, found: 415.1232.

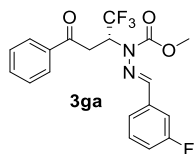

**(R,E)-methyl 2-(3-fluorobenzylidene)-1-(1,1,1-trifluoro-4-oxo-4-phenylbutan-2-yl)hydrazinecarboxylate (3ga):** Colorless oil; 55% yield, 96% ee;  $[\alpha]_D^{18} = 97.4$  (c 1.0,  $CHCl_3$ ); **HPLC** CHIRALPAK IF, n-Hexane/2-propanol = 90/10, flow rate = 1.0 mL/min,  $\lambda = 254$  nm, retention time: 5.170 min (major), 5.715 min (minor);  **$^1H$  NMR** (400 MHz,  $CDCl_3$ )  $\delta$  8.97 (s, 1H), 8.05 – 7.89 (m, 2H), 7.64 – 7.55 (m, 1H), 7.53 – 7.43 (m, 2H), 7.35 – 7.21 (m, 3H), 7.11 – 6.96 (m, 1H), 5.79 – 5.61 (m, 1H), 4.24 (dd, J = 17.7, 10.2 Hz, 1H), 3.93 (s, 3H), 3.26 (dd, J = 17.7, 3.2 Hz, 1H);  **$^{13}C\{^1H\}$  NMR** (100 MHz,  $CDCl_3$ )  $\delta$  195.2, 163.1 (d, J = 244.3 Hz), 154.2, 153.3, 137.3 (d, J = 7.8 Hz), 136.4, 133.9, 130.2 (d, J = 8.0 Hz), 128.9, 128.3, 125.1 (q, J = 281.1 Hz), 124.1 (d, J = 2.9 Hz), 117.4 (d, J = 21.6 Hz), 113.2 (d, J = 22.5 Hz), 56.8 (q, J = 30.8 Hz), 53.9, 34.9;  **$^{19}F\{^1H\}$  NMR** (376 MHz,  $CDCl_3$ )  $\delta$  -73.54, -112.81; **HRMS** (ESI) calcd. for  $C_{19}H_{16}F_4N_2O_3Na$  ( $[M+Na]^+$ ): 419.0989, found: 419.0985.

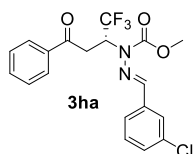

**(R,E)-methyl 2-(3-chlorobenzylidene)-1-(1,1,1-trifluoro-4-oxo-4-phenylbutan-2-yl)hydrazinecarboxylate (3ha):** White solid; 55% yield, 96% ee; m.p.: 98.7 – 99.4 °C;  $[\alpha]_D^{19} = 64.6$  (c 1.0,  $CHCl_3$ ); **HPLC** CHIRALPAK OD - H, n-Hexane/2-propanol = 90/10, flow rate = 1.0 mL/min,  $\lambda = 254$  nm, retention time: 4.877 min (major), 8.677 min (minor);  **$^1H$  NMR** (400 MHz,  $CDCl_3$ )  $\delta$  8.93 (s, 1H), 8.11 – 7.91 (m, 2H), 7.66 – 7.55 (m, 1H), 7.55 – 7.44 (m, 3H), 7.43 – 7.33 (m, 1H), 7.34 – 7.27 (m, 1H), 7.29 – 7.22 (m, 1H), 5.82 – 5.63 (m, 1H), 4.26 (dd, J = 17.6, 10.4 Hz, 1H), 3.93 (s, 3H), 3.25 (dd, J = 17.6, 3.2 Hz, 1H);  **$^{13}C\{^1H\}$  NMR** (100 MHz,  $CDCl_3$ )  $\delta$  195.2, 154.2, 153.2, 136.7, 136.3, 134.8, 133.9, 130.4, 129.9, 129.0, 128.3, 126.8, 126.2, 125.1 (q, J = 281.4 Hz), 56.8 (q, J = 30.5 Hz), 53.9, 34.8;  **$^{19}F\{^1H\}$  NMR** (376 MHz,  $CDCl_3$ )  $\delta$  -73.57;

**HRMS** (ESI) calcd. for C<sub>19</sub>H<sub>16</sub>ClF<sub>3</sub>N<sub>2</sub>O<sub>3</sub>Na ([M+Na]<sup>+</sup>): 435.0694, found: 435.0690.

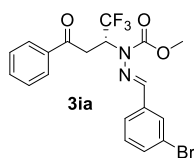

**(R,E)-methyl 2-(3-bromobenzylidene)-1-(1,1,1-trifluoro-4-oxo-4-phenylbutan-2-yl)hydrazinecarboxylate (3ia):** White solid; 70% yield, 97% ee; m.p.: 54.3 – 54.9 °C;  $[\alpha]_D^{19} = 80.1$  (c 1.0, CHCl<sub>3</sub>); **HPLC** CHIRALPAK OD–H, n–Hexane/2–propanol = 90/10, flow rate = 1.0 mL/min,  $\lambda = 254$  nm, retention time: 5.628 min (major), 8.715 min (minor); **<sup>1</sup>H NMR** (400 MHz, CDCl<sub>3</sub>)  $\delta$  8.92 (s, 1H), 8.05 – 7.94 (m, 2H), 7.72 – 7.64 (m, 1H), 7.63 – 7.56 (m, 1H), 7.52 – 7.38 (m, 4H), 7.23 – 7.14 (m, 1H), 5.94 – 5.52 (m, 1H), 4.26 (dd, J = 17.6, 10.4 Hz, 1H), 3.93 (s, 3H), 3.24 (dd, J = 17.6, 3.2 Hz, 1H); **<sup>13</sup>C{<sup>1</sup>H} NMR** (100 MHz, CDCl<sub>3</sub>)  $\delta$  195.2, 154.1, 153.0, 136.9, 136.3, 133.9, 133.3, 130.2, 129.8, 129.0, 128.3, 126.6, 125.1 (q, J = 281.1 Hz), 122.9, 56.8 (q, J = 30.6 Hz), 53.9, 34.8; **<sup>19</sup>F{<sup>1</sup>H} NMR** (376 MHz, CDCl<sub>3</sub>)  $\delta$  -73.56; **HRMS** (ESI) calcd. for C<sub>19</sub>H<sub>16</sub>BrF<sub>3</sub>N<sub>2</sub>O<sub>3</sub>Na ([M+Na]<sup>+</sup>): 479.0189, found: 479.0199.

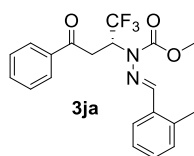

**(R,E)-methyl 2-(2-methylbenzylidene)-1-(1,1,1-trifluoro-4-oxo-4-phenylbutan-2-yl)hydrazinecarboxylate (3ja):** Colorless oil; 65% yield, 98% ee;  $[\alpha]_D^{19} = 81.3$  (c 1.0, CHCl<sub>3</sub>); **HPLC** CHIRALPAK OD–H, n–Hexane/2–propanol = 90/10, flow rate = 1.0 mL/min,  $\lambda = 254$  nm, retention time: 4.840 min (major), 7.908 min (minor); **<sup>1</sup>H NMR** (400 MHz, CDCl<sub>3</sub>)  $\delta$  9.16 (s, 1H), 8.12 – 7.94 (m, 2H), 7.73 – 7.54 (m, 2H), 7.53 – 7.40 (m, 2H), 7.33 – 7.20 (m, 1H), 7.20 – 7.09 (m, 2H), 5.87 – 5.66 (m, 1H), 4.26 (dd, J = 17.7, 10.3 Hz, 1H), 3.92 (s, 3H), 3.25 (dd, J = 17.7, 3.2 Hz, 1H), 2.40 (s, 3H); **<sup>13</sup>C{<sup>1</sup>H} NMR** (100 MHz, CDCl<sub>3</sub>)  $\delta$  195.3, 155.7, 154.4, 137.8, 136.4, 133.8, 132.7, 131.0, 130.3, 128.9, 128.3, 127.1, 126.12, 125.2 (q, J = 281.0 Hz), 56.7 (q, J = 30.4 Hz), 53.8, 34.8, 19.8; **<sup>19</sup>F{<sup>1</sup>H} NMR** (376 MHz, CDCl<sub>3</sub>)  $\delta$  -73.44; **HRMS** (ESI) calcd. for C<sub>20</sub>H<sub>19</sub>F<sub>3</sub>N<sub>2</sub>O<sub>3</sub>Na ([M+Na]<sup>+</sup>): 415.1240, found: 415.1237.

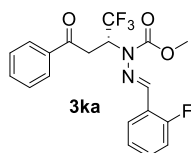

**(*R,E*)-methyl 2-(2-fluorobenzylidene)-1-(1,1,1-trifluoro-4-oxo-4-phenylbutan-2-yl)hydrazinecarboxylate (3ka):** Colorless oil; 60% yield, 96% ee;  $[\alpha]_D^{19} = 83.3$  (c 1.0,  $\text{CHCl}_3$ ); **HPLC** CHIRALPAK IG, n-Hexane/2-propanol = 95/5, flow rate = 0.5 mL/min,  $\lambda = 254$  nm, retention time: 17.937 min (major), 16.778 min (minor);  **$^1\text{H}$  NMR** (400 MHz,  $\text{CDCl}_3$ )  $\delta$  9.18 (s, 1H), 8.15 – 7.85 (m, 2H), 7.68 – 7.54 (m, 2H), 7.52 – 7.43 (m, 2H), 7.37 – 7.29 (m, 1H), 7.10 – 6.99 (m, 2H), 5.83 – 5.67 (m, 1H), 4.25 (dd,  $J = 17.7, 10.3$  Hz, 1H), 3.93 (s, 3H), 3.26 (dd,  $J = 17.7, 3.2$  Hz, 1H);  **$^{13}\text{C}\{^1\text{H}\}$  NMR** (100 MHz,  $\text{CDCl}_3$ )  $\delta$  195.2, 161.7 (d,  $J = 252.0$  Hz), 158.5, 154.2, 136.4, 133.8, 132.0 (d,  $J = 8.6$  Hz), 128.9, 128.3, 126.8 (d,  $J = 2.8$  Hz), 125.2 (q,  $J = 281.0$  Hz), 124.3 (d,  $J = 3.4$  Hz), 122.7 (d,  $J = 9.5$  Hz), 116.01 (d,  $J = 20.9$  Hz), 56.8 (q,  $J = 30.6$  Hz), 53.9, 34.8;  **$^{19}\text{F}\{^1\text{H}\}$  NMR** (376 MHz,  $\text{CDCl}_3$ )  $\delta$  -73.53, -119.53; **HRMS** (ESI) calcd. for  $\text{C}_{19}\text{H}_{16}\text{F}_4\text{N}_2\text{O}_3\text{Na}$  ( $[\text{M}+\text{Na}]^+$ ): 419.0989, found: 419.0981.

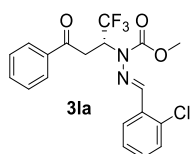

**(*R,E*)-methyl 2-(2-chlorobenzylidene)-1-(1,1,1-trifluoro-4-oxo-4-phenylbutan-2-yl)hydrazinecarboxylate (3la):** White solid; 60% yield, 96% ee; m.p.: 135.5 – 136.2 °C;  $[\alpha]_D^{18} = 71.0$  (c 1.0,  $\text{CHCl}_3$ ); **HPLC** CHIRALPAK IG, n-Hexane/2-propanol = 90/10, flow rate = 1.0 mL/min,  $\lambda = 254$  nm, retention time: 6.607 min (major), 5.715 min (minor);  **$^1\text{H}$  NMR** (400 MHz,  $\text{CDCl}_3$ )  $\delta$  9.39 (s, 1H), 8.03 – 7.93 (m, 2H), 7.75 – 7.66 (m, 1H), 7.62 – 7.55 (m, 1H), 7.52 – 7.42 (m, 2H), 7.39 – 7.31 (m, 1H), 7.30 – 7.24 (m, 1H), 7.20 – 7.12 (m, 1H), 5.88 – 5.66 (m, 1H), 4.24 (dd,  $J = 17.7, 10.2$  Hz, 1H), 3.94 (s, 3H), 3.28 (dd,  $J = 17.7, 3.2$  Hz, 1H);  **$^{13}\text{C}\{^1\text{H}\}$  NMR** (100 MHz,  $\text{CDCl}_3$ )  $\delta$  195.1, 154.1, 151.4, 136.3, 135.1, 133.8, 132.4, 131.3, 130.0, 128.9, 128.3, 127.1, 126.9, 125.1 (q,  $J = 281.0$  Hz), 56.8 (q,  $J = 30.5$  Hz), 54.0, 35.0;  **$^{19}\text{F}\{^1\text{H}\}$  NMR** (376 MHz,  $\text{CDCl}_3$ )  $\delta$  -73.46; **HRMS** (ESI) calcd. for  $\text{C}_{19}\text{H}_{16}\text{ClF}_3\text{N}_2\text{O}_3\text{Na}$  ( $[\text{M}+\text{Na}]^+$ ): 435.0694, found: 435.0691.

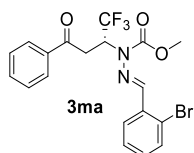

**(*R,E*)-methyl 2-(2-bromobenzylidene)-1-(1,1,1-trifluoro-4-oxo-4-phenylbutan-2-yl)hydrazinecarboxylate (3ma):** White solid; 45% yield, 96% ee; m.p.: 115.3 – 116.9 °C;  $[\alpha]_D^{18} = 41.0$  (c 1.0, CHCl<sub>3</sub>); **HPLC** CHIRALPAK MD, n-Hexane/2-propanol = 90/10, flow rate = 1.0 mL/min,  $\lambda = 254$  nm, retention time: 5.797 min (major), 8.333 min (minor); **<sup>1</sup>H NMR** (400 MHz, CDCl<sub>3</sub>)  $\delta$  9.38 (s, 1H), 8.04 – 7.93 (m, 2H), 7.72 – 7.65 (m, 1H), 7.62 – 7.56 (m, 1H), 7.55 – 7.52 (m, 1H), 7.51 – 7.42 (m, 2H), 7.25 – 7.15 (m, 2H), 5.84 – 5.69 (m, 1H), 4.23 (dd, J = 17.7, 10.2 Hz, 1H), 3.94 (s, 3H), 3.28 (dd, J = 17.7, 3.2 Hz, 1H); **<sup>13</sup>C{<sup>1</sup>H} NMR** (100 MHz, CDCl<sub>3</sub>)  $\delta$  195.1, 154.1, 153.5, 136.3, 134.0, 133.8, 133.3, 131.5, 128.9, 128.3, 127.5, 125.1 (q, J = 281.0 Hz), 125.1, 56.8 (q, J = 30.7 Hz), 54.0, 35.0; **<sup>19</sup>F{<sup>1</sup>H} NMR** (376 MHz, CDCl<sub>3</sub>)  $\delta$  -73.44; **HRMS** (ESI) calcd. for C<sub>19</sub>H<sub>16</sub>BrF<sub>3</sub>N<sub>2</sub>O<sub>3</sub>Na ([M+Na]<sup>+</sup>): 479.0189, found: 479.0177.

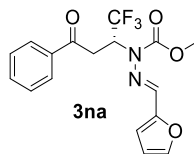

**(*R,E*)-methyl 2-(furan-2-ylmethylene)-1-(1,1,1-trifluoro-4-oxo-4-phenylbutan-2-yl)hydrazinecarboxylate (3na):** White solid; 52% yield, 96% ee; m.p.: 88.6 – 89.0 °C;  $[\alpha]_D^{18} = 68.8$  (c 1.0, CHCl<sub>3</sub>); **HPLC** CHIRALPAK OD-H, n-Hexane/2-propanol = 90/10, flow rate = 1.0 mL/min,  $\lambda = 254$  nm, retention time: 5.393 min (major), 8.043 min (minor); **<sup>1</sup>H NMR** (600 MHz, CDCl<sub>3</sub>)  $\delta$  8.81 (s, 1H), 8.08 – 7.90 (m, 2H), 7.62 – 7.55 (m, 1H), 7.51 – 7.43 (m, 3H), 6.61 (d, J = 3.4 Hz, 1H), 6.42 (dd, J = 3.5, 1.8 Hz, 1H), 5.81 – 5.54 (m, 1H), 4.29 (dd, J = 17.6, 10.2 Hz, 1H), 3.90 (s, 3H), 3.20 (dd, J = 17.7, 3.2 Hz, 1H); **<sup>13</sup>C{<sup>1</sup>H} NMR** (150 MHz, CDCl<sub>3</sub>)  $\delta$  195.6, 154.2, 150.1, 144.8, 136.5, 133.7, 128.8, 128.4, 125.1 (q, J = 281.1 Hz), 113.8, 111.9, 56.7 (q, J = 30.5 Hz), 53.8, 34.7; **<sup>19</sup>F{<sup>1</sup>H} NMR** (565 MHz, CDCl<sub>3</sub>)  $\delta$  -73.53; **HRMS** (ESI) calcd. for C<sub>17</sub>H<sub>15</sub>F<sub>3</sub>N<sub>2</sub>O<sub>4</sub>Na ([M+Na]<sup>+</sup>): 391.0876, found: 391.0873.



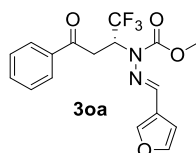

**(*R,E*)-methyl 2-(furan-3-ylmethylene)-1-(1,1,1-trifluoro-4-oxo-4-phenylbutan-2-yl)hydrazinecarboxylate (3oa):** White solid; 42% yield, 97% ee; m.p.: 90.1 – 90.7 °C;  $[\alpha]_D^{18} = 50.3$  (c 1.0, CHCl<sub>3</sub>); **HPLC** CHIRALPAK OD–H, n–Hexane/2–propanol = 90/10, flow rate = 1.0 mL/min,  $\lambda = 254$  nm, retention time: 5.310 min (major), 9.260 min (minor); **<sup>1</sup>H NMR** (400 MHz, CDCl<sub>3</sub>)  $\delta$  8.77 (s, 1H), 8.05 – 7.90 (m, 2H), 7.70 – 7.54 (m, 2H), 7.52 – 7.42 (m, 2H), 7.37 – 7.31 (m, 1H), 6.63 – 6.38 (m, 1H), 5.72 – 5.62 (m, 1H), 4.20 (dd, J = 17.5, 10.4 Hz, 1H), 3.89 (s, 3H), 3.18 (dd, J = 17.6, 3.3 Hz, 1H); **<sup>13</sup>C{<sup>1</sup>H} NMR** (100 MHz, CDCl<sub>3</sub>)  $\delta$  195.3, 154.5, 149.7, 145.1, 144.1, 136.5, 133.8, 129.0, 128.3, 125.2 (q, J = 281.1 Hz), 123.2, 107.2, 56.5 (q, J = 30.4 Hz), 53.8, 34.5; **<sup>19</sup>F{<sup>1</sup>H} NMR** (376 MHz, CDCl<sub>3</sub>)  $\delta$  -73.64; **HRMS** (ESI) calcd. for C<sub>17</sub>H<sub>15</sub>F<sub>3</sub>N<sub>2</sub>O<sub>4</sub>Na ([M+Na]<sup>+</sup>): 391.0876, found: 391.0875.

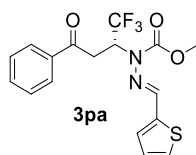

**(*R,E*)-methyl 2-(thiophen-2-ylmethylene)-1-(1,1,1-trifluoro-4-oxo-4-phenylbutan-2-yl)hydrazinecarboxylate (3pa):** White solid; 82% yield, 97% ee; m.p.: 93.9 – 94.8 °C;  $[\alpha]_D^{18} = 82.2$  (c 1.0, CHCl<sub>3</sub>); **HPLC** CHIRALPAK IF, n–Hexane/2–propanol = 90/10, flow rate = 1.0 mL/min,  $\lambda = 254$  nm, retention time: 6.827 min (major), 8.512 min (minor); **<sup>1</sup>H NMR** (400 MHz, CDCl<sub>3</sub>)  $\delta$  9.07 (s, 1H), 8.10 – 7.93 (m, 2H), 7.68 – 7.53 (m, 1H), 7.52 – 7.42 (m, 2H), 7.36 – 7.27 (m, 1H), 7.24 – 7.17 (m, 1H), 7.04 – 6.95 (m, 1H), 5.79 – 5.59 (m, 1H), 4.29 (dd, J = 17.7, 10.4 Hz, 1H), 3.91 (s, 3H), 3.17 (dd, J = 17.6, 3.2 Hz, 1H); **<sup>13</sup>C{<sup>1</sup>H} NMR** (100 MHz, CDCl<sub>3</sub>)  $\delta$  195.5, 154.3, 149.5, 140.1, 136.4, 133.8, 130.8, 128.9, 128.7, 128.4, 127.5, 125.1 (q, J = 281.0 Hz), 115.4, 56.6 (q, J = 30.7 Hz), 53.9, 34.6; **<sup>19</sup>F{<sup>1</sup>H} NMR** (376 MHz, CDCl<sub>3</sub>)  $\delta$  -73.72; **HRMS** (ESI) calcd. for C<sub>17</sub>H<sub>15</sub>F<sub>3</sub>N<sub>2</sub>O<sub>3</sub>SNa ([M+Na]<sup>+</sup>): 407.0648, found: 407.0641.

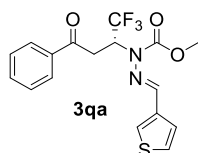

**(*R,E*)-methyl 2-(thiophen-3-ylmethylene)-1-(1,1,1-trifluoro-4-oxo-4-phenylbutan-2-yl)hydrazinecarboxylate (3qa):** White solid; 79% yield, 98% ee; m.p.: 101.2 – 101.8 °C;  $[\alpha]_D^{19} = 61.2$  (c 1.0, CHCl<sub>3</sub>); **HPLC** CHIRALPAK IF, n-Hexane/2-propanol = 90/10, flow rate = 1.0 mL/min,  $\lambda = 254$  nm, retention time: 7.427 min (major), 9.767 min (minor); **<sup>1</sup>H NMR** (400 MHz, CDCl<sub>3</sub>)  $\delta$  8.87 (s, 1H), 8.11 – 7.90 (m, 2H), 7.68 – 7.53 (m, 1H), 7.52 – 7.40 (m, 3H), 7.30 – 7.19 (m, 2H), 5.80 – 5.60 (m, 1H), 4.21 (dd, J = 17.6, 10.3 Hz, 1H), 3.89 (s, 3H), 3.20 (dd, J = 17.6, 3.2 Hz, 1H); **<sup>13</sup>C{<sup>1</sup>H} NMR** (100 MHz, CDCl<sub>3</sub>)  $\delta$  195.2, 154.4, 151.8, 138.0, 136.4, 133.8, 128.9, 128.4, 128.26, 126.5, 125.2 (q, J = 281.6 Hz), 125.0, 56.6 (q, J = 30.7 Hz), 53.8, 34.6.; **<sup>19</sup>F{<sup>1</sup>H} NMR** (376 MHz, CDCl<sub>3</sub>)  $\delta$  -73.56; **HRMS** (ESI) calcd. for C<sub>17</sub>H<sub>15</sub>F<sub>3</sub>N<sub>2</sub>O<sub>3</sub>SNa ([M+Na]<sup>+</sup>): 407.0648, found: 407.0639.

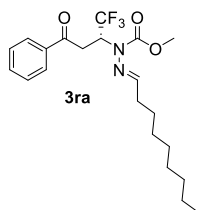

**(*R,E*)-methyl 2-nonylidene-1-(1,1,1-trifluoro-4-oxo-4-phenylbutan-2-yl)hydrazinecarboxylate (3ra):** White solid; 56% yield, 90% ee; m.p.: 91.4 – 92.6 °C;  $[\alpha]_D^{19} = 61.2$  (c 1.0, CHCl<sub>3</sub>); **HPLC** CHIRALPAK OD-H, n-Hexane/2-propanol = 90/10, flow rate = 1.0 mL/min,  $\lambda = 254$  nm, retention time: 3.660 min (major), 5.335 min (minor); **<sup>1</sup>H NMR** (400 MHz, CDCl<sub>3</sub>)  $\delta$  8.03 (s, 1H), 8.00 – 7.94 (m, 2H), 7.62 – 7.54 (m, 1H), 7.52 – 7.42 (m, 2H), 5.66 – 5.44 (m, 1H), 4.13 (dd, J = 17.6, 10.2 Hz, 1H), 3.84 (s, 3H), 3.13 (dd, J = 17.6, 3.4 Hz, 1H), 2.34 – 2.13 (m, 2H), 1.48 – 1.38 (m, 2H), 1.31 – 1.18 (m, 10H), 0.87 (t, J = 7.0 Hz, 3H); **<sup>13</sup>C{<sup>1</sup>H} NMR** (100 MHz, CDCl<sub>3</sub>)  $\delta$  195.3, 165.3, 154.8, 136.5, 133.6, 128.8, 128.3, 125.3 (q, J = 281.0 Hz), 56.0 (q, J = 30.6 Hz), 53.6, 34.4, 33.4, 32.0, 29.4, 29.3, 29.1, 25.9, 22.8, 14.2; **<sup>19</sup>F{<sup>1</sup>H} NMR** (376 MHz, CDCl<sub>3</sub>)  $\delta$  -73.60; **HRMS** (ESI) calcd. for C<sub>21</sub>H<sub>29</sub>F<sub>3</sub>N<sub>2</sub>O<sub>3</sub>Na ([M+Na]<sup>+</sup>): 437.2022, found: 437.2013.

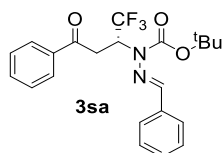

**(*R,E*)-tert-butyl 2-benzylidene-1-(1,1,1-trifluoro-4-oxo-4-phenylbutan-2-yl)hydrazinecarboxylate (3sa):** White solid; 55% yield, 98% ee; m.p.: 101.4 – 102.3 °C;  $[\alpha]_D^{19} = 50.7$  (c 1.0, CHCl<sub>3</sub>); **HPLC** CHIRALPAK MD, n-Hexane/2-propanol = 90/10, flow rate = 1.0 mL/min,  $\lambda = 254$  nm, retention time: 3.780 min (major), 4.250 min (minor); **<sup>1</sup>H NMR** (400 MHz, CDCl<sub>3</sub>)  $\delta$  8.92 (s, 1H), 8.01 – 7.97 (m, 2H), 7.61 – 7.51 (m, 3H), 7.50 – 7.42 (m, 2H), 7.36 – 7.28 (m, 3H), 5.75 – 5.65 (m, 1H), 4.25 (dd, J = 17.4, 10.2 Hz, 1H), 3.20 (dd, J = 17.4, 3.3 Hz, 1H), 1.59 (s, 9H); **<sup>13</sup>C{<sup>1</sup>H} NMR** (100 MHz, CDCl<sub>3</sub>)  $\delta$  195.3, 154.8, 152.7, 136.6, 135.1, 133.6, 130.3, 128.8, 128.6, 128.3, 127.5, 125.4 (q, J = 281.3 Hz), 83.2, 56.8 (q, J = 30.4 Hz), 35.0, 28.3; **<sup>19</sup>F{<sup>1</sup>H} NMR** (376 MHz, CDCl<sub>3</sub>)  $\delta$  -73.47; **HRMS** (ESI) calcd. for C<sub>22</sub>H<sub>23</sub>F<sub>3</sub>N<sub>2</sub>O<sub>3</sub>Na ([M+Na]<sup>+</sup>): 443.1553, found: 443.1560.

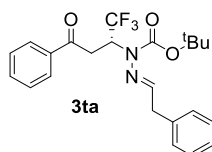

**(*R,E*)-tert-butyl 2-(2-phenylethylidene)-1-(1,1,1-trifluoro-4-oxo-4-phenylbutan-2-yl)hydrazine-1-carboxylate (3ta):** colorless oil; 58% yield, 87% ee;  $[\alpha]_D^{25} = 15.2$  (c 1.0 CHCl<sub>3</sub>); **HPLC** CHIRALPAK OD-H, n-Hexane/2-propanol = 90/10, flow rate = 1.0 mL/min,  $\lambda = 254$  nm, retention time: 4.018 min (major), 4.439 min (minor); **<sup>1</sup>H NMR** (400 MHz, CDCl<sub>3</sub>)  $\delta$  8.23 (s, 1H), 8.01 – 7.84 (m, 2H), 7.64 – 7.51 (m, 1H), 7.52 – 7.41 (m, 2H), 7.24 – 7.13 (m, 3H), 7.15 – 7.06 (m, 2H), 5.66 – 5.49 (m, 1H), 4.12 (dd, J = 17.4, 10.2 Hz, 1H), 3.54 (d, J = 5.5 Hz, 2H), 3.08 (dd, J = 17.4, 3.3 Hz, 1H), 1.51 (s, 9H); **<sup>13</sup>C{<sup>1</sup>H} NMR** (100 MHz, CDCl<sub>3</sub>)  $\delta$  195.3, 160.0, 152.8, 136.7, 136.3, 133.5, 129.2, 128.8, 128.7, 128.3, 126.8, 125.4 (q, J = 281.1 Hz), 82.6, 56.2 (q, J = 30.2 Hz), 40.3, 34.7, 28.3; **<sup>19</sup>F{<sup>1</sup>H} NMR** (376 MHz, CDCl<sub>3</sub>)  $\delta$  -73.54; **HRMS** (ESI) calcd. for C<sub>23</sub>H<sub>25</sub>F<sub>3</sub>N<sub>2</sub>O<sub>3</sub> ([M+Na]<sup>+</sup>): 457.1709, found: 457.1700.

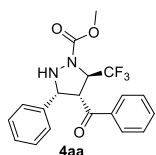

**(3R,4R,5R)-methyl 4-benzoyl-3-phenyl-5-(trifluoromethyl)pyrazolidine-1-carboxylate (4aa):** White solid; 83% yield, 92% ee, >20:1 dr; m.p.: 155.4 – 156.2 °C;  $[\alpha]_D^{19} = -20.5$  (c 1.0, CHCl<sub>3</sub>); **HPLC** CHIRALPAK IF, n-Hexane/2-propanol = 70/30, flow rate = 1.0 mL/min,  $\lambda = 254$  nm, retention time: 8.090 min (major), 12.903 min (minor); **<sup>1</sup>H NMR** (600 MHz, CDCl<sub>3</sub>)  $\delta$  7.73 – 7.59 (m, 2H), 7.57 – 7.45 (m, 1H), 7.41 – 7.30 (m, 2H), 7.14 – 6.99 (m, 3H), 6.87 – 6.77 (m, 2H), 5.73 – 5.63 (m, 1H), 5.16 (s, 1H), 4.98 (d, J = 8.2 Hz, 1H), 4.74 (dd, J = 8.2, 5.0 Hz, 1H), 3.81 (s, 3H); **<sup>13</sup>C{<sup>1</sup>H} NMR** (100 MHz, CDCl<sub>3</sub>)  $\delta$  193.8, 157.1, 136.4, 135.9, 133.8, 128.9, 128.6, 128.3, 128.2, 127.4, 125.5 (q, J = 279.9 Hz), 66.4, 61.8 (q, J = 31.2 Hz), 56.2, 54.0; **<sup>19</sup>F{<sup>1</sup>H} NMR** (376 MHz, CDCl<sub>3</sub>)  $\delta$  -75.10; **HRMS** (ESI) calcd. for C<sub>19</sub>H<sub>17</sub>F<sub>3</sub>N<sub>2</sub>O<sub>3</sub>Na ([M+Na]<sup>+</sup>): 401.1083, found: 401.1077.

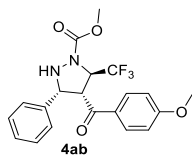

**(3R,4R,5R)-methyl 4-(4-methoxybenzoyl)-3-phenyl-5-(trifluoromethyl)pyrazolidine-1-carboxylate (4ab):** White solid; 59% yield, 95% ee, >20:1 dr; m.p.: 134.9 – 135.6 °C;  $[\alpha]_D^{19} = -12.7$  (c 1.0, CHCl<sub>3</sub>); **HPLC** CHIRALPAK IG, n-Hexane/2-propanol = 70/30, flow rate = 1.0 mL/min,  $\lambda = 254$  nm, retention time: 9.070 min (major), 19.607 min (minor); **<sup>1</sup>H NMR** (600 MHz, CDCl<sub>3</sub>)  $\delta$  7.71 – 7.64 (m, 1H), 7.12 – 7.03 (m, 1H), 6.90 – 6.83 (m, 1H), 6.84 – 6.78 (m, 1H), 5.70 – 5.54 (m, 1H), 4.97 (d, J = 8.1 Hz, 1H), 4.69 (dd, J = 8.1, 5.0 Hz, 1H), 3.82 (s, 2H), 3.80 (s, 2H); **<sup>13</sup>C{<sup>1</sup>H} NMR** (150 MHz, CDCl<sub>3</sub>)  $\delta$  192.1, 164.0, 157.0, 135.9, 130.6, 129.3, 128.5, 128.2, 127.3, 125.5 (q, J = 279.1 Hz), 114.0, 66.41, 62.0 (q, J = 30.9 Hz), 55.6 (two peaks), 53.9; **<sup>19</sup>F{<sup>1</sup>H} NMR** (565 MHz, CDCl<sub>3</sub>)  $\delta$  -74.42; **HRMS** (ESI) calcd. for C<sub>20</sub>H<sub>19</sub>F<sub>3</sub>N<sub>2</sub>O<sub>4</sub>Na ([M+Na]<sup>+</sup>): 431.1189, found: 431.1183.

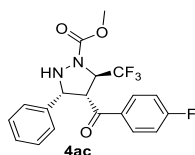

**(3R,4R,5R)-methyl 4-(4-fluorobenzoyl)-3-phenyl-5-(trifluoromethyl)pyrazolidine-1-carboxylate (4ac):** White solid; 68% yield, 93% ee, >20:1 dr; m.p.: 53.6 – 54.4 °C;  $[\alpha]_D^{19} = -25.7$  (c 1.0, CHCl<sub>3</sub>); **HPLC** CHIRALPAK IG, n-Hexane/2-propanol = 70/30, flow rate = 1.0 mL/min,  $\lambda = 254$  nm, retention time: 5.877 min (major), 9.975 min (minor); **<sup>1</sup>H NMR** (600 MHz, CDCl<sub>3</sub>)  $\delta$  7.76 – 7.55 (m, 2H), 7.14 – 7.02 (m, 3H), 7.06 – 6.96 (m, 2H), 6.87 – 6.73 (m, 2H), 5.65 (s, 1H), 5.27 – 5.16 (m, 1H), 5.03 – 4.90 (m, 1H), 4.77 – 4.62 (m, 1H), 3.81 (s, 3H); **<sup>13</sup>C{<sup>1</sup>H} NMR** (151 MHz, CDCl<sub>3</sub>)  $\delta$  192.4, 166.0 (d, J = 273.3 Hz), 157.1, 135.8, 132.8 (d, J = 3.2 Hz), 130.9 (d, J = 9.7 Hz), 128.6, 128.4, 127.3, 125.4 (q, J = 281.6 Hz), 116.0 (d, J = 22 Hz), 66.3, 61.9 (q, J = 31.7 Hz), 56.1, 54.0; **<sup>19</sup>F{<sup>1</sup>H} NMR** (565 MHz, CDCl<sub>3</sub>)  $\delta$  -74.49, -103.47; **HRMS** (ESI) calcd. for C<sub>19</sub>H<sub>16</sub>F<sub>4</sub>N<sub>2</sub>O<sub>3</sub>Na ([M+Na]<sup>+</sup>): 419.0989, found: 419.0978.

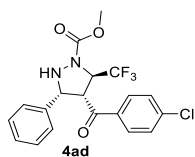

**(3R,4R,5R)-methyl 4-(4-chlorobenzoyl)-3-phenyl-5-(trifluoromethyl)pyrazolidine-1-carboxylate (4ad):** White solid; 73% yield, 91% ee, >20:1 dr; m.p.: 103.2 – 103.9 °C;  $[\alpha]_D^{19} = -31.4$  (c 1.0, CHCl<sub>3</sub>); **HPLC** CHIRALPAK IG, n-Hexane/2-propanol = 70/30, flow rate = 1.0 mL/min,  $\lambda = 254$  nm, retention time: 5.425 min (major), 10.962 min (minor); **<sup>1</sup>H NMR** (600 MHz, CDCl<sub>3</sub>)  $\delta$  7.71 – 7.46 (m, 2H), 7.38 – 7.25 (m, 2H), 7.15 – 7.02 (m, 3H), 6.93 – 6.75 (m, 2H), 5.65 (s, 1H), 5.28 – 5.09 (m, 1H), 5.06 – 4.80 (m, 1H), 4.76 – 4.60 (m, 1H), 3.81 (s, 3H); **<sup>13</sup>C{<sup>1</sup>H} NMR** (151 MHz, CDCl<sub>3</sub>)  $\delta$  192.9, 157.1, 140.4, 135.7, 134.7, 129.5, 129.2, 128.7, 128.5, 127.4, 125.4 (q, J = 281.7 Hz), 66.3, 61.9 (q, J = 31.4 Hz) 56.1, 54.1; **<sup>19</sup>F{<sup>1</sup>H} NMR** (376 MHz, CDCl<sub>3</sub>)  $\delta$  -74.52; **HRMS** (ESI) calcd. for C<sub>19</sub>H<sub>16</sub>ClF<sub>3</sub>N<sub>2</sub>O<sub>3</sub>Na ([M+Na]<sup>+</sup>): 435.0694, found: 435.0689.

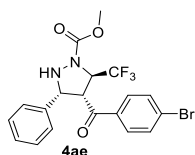

**(3R,4R,5R)-methyl 4-(4-bromobenzoyl)-3-phenyl-5-(trifluoromethyl)pyrazolidine-1-carboxylate (4ae):** White solid; 70% yield, 91% ee, >20:1 dr; m.p.: 159.4 – 159.9 °C;  $[\alpha]_{\text{D}}^{22} = -52.5$  (c 1.0, CHCl<sub>3</sub>); **HPLC** CHIRALPAK IG, n-Hexane/2-propanol = 70/30, flow rate = 1.0 mL/min,  $\lambda = 254$  nm, retention time: 5.527 min (major), 11.780 min (minor); **<sup>1</sup>H NMR** (600 MHz, CDCl<sub>3</sub>)  $\delta$  7.61 – 7.39 (m, 4H), 7.18 – 7.00 (m, 3H), 6.90 – 6.76 (m, 2H), 5.72 – 5.56 (m, 1H), 5.17 (s, 1H), 4.96 (d, J = 8.1 Hz, 1H), 4.67 (dd, J = 8.2, 4.9 Hz, 1H), 3.81 (s, 3H); **<sup>13</sup>C{<sup>1</sup>H} NMR** (151 MHz, CDCl<sub>3</sub>)  $\delta$  193.0, 157.1, 135.7, 135.1, 132.1, 129.6, 129.1, 128.7, 128.5, 127.4, 125.4 (q, J = 281.8 Hz), 66.3, 61.8 (q, J = 31.6 Hz), 56.1, 54.0; **<sup>19</sup>F{<sup>1</sup>H} NMR** (565 MHz, CDCl<sub>3</sub>)  $\delta$  -74.51; **HRMS** (ESI) calcd. for C<sub>19</sub>H<sub>16</sub>BrF<sub>3</sub>N<sub>2</sub>O<sub>3</sub>Na ([M+Na]<sup>+</sup>): 479.0189, found: 479.0192.

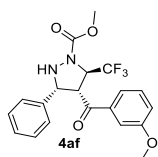

**(3R,4R,5R)-methyl 4-(3-methoxybenzoyl)-3-phenyl-5-(trifluoromethyl)pyrazolidine-1-carboxylate (4af):** White solid; 73% yield, 94% ee, >20:1 dr; m.p.: 149.8 – 150.3 °C;  $[\alpha]_{\text{D}}^{19} = -6.4$  (c 1.0, CHCl<sub>3</sub>); **HPLC** CHIRALPAK IG, n-Hexane/2-propanol = 70/30, flow rate = 1.0 mL/min,  $\lambda = 254$  nm, retention time: 7.803 min (major), 12.667 min (minor); **<sup>1</sup>H NMR** (600 MHz, CDCl<sub>3</sub>)  $\delta$  7.38 – 7.23 (m, 2H), 7.12 – 6.99 (m, 5H), 6.88 – 6.75 (m, 2H), 5.73 – 5.56 (m, 1H), 5.19 (s, 1H), 4.97 (d, J = 8.2 Hz, 1H), 4.76 – 4.64 (m, 1H), 3.81 (s, 3H), 3.73 (s, 3H); **<sup>13</sup>C{<sup>1</sup>H} NMR** (150 MHz, CDCl<sub>3</sub>)  $\delta$  193.7, 159.9, 157.1, 137.8, 135.9, 129.7, 128.6, 128.3, 127.4, 125.5 (q, J = 279.7 Hz), 120.6, 120.2, 112.6, 66.4, 61.8 (q, J = 31.3 Hz), 56.4, 55.5, 54.0; **<sup>19</sup>F{<sup>1</sup>H} NMR** (565 MHz, CDCl<sub>3</sub>)  $\delta$  -74.51; **HRMS** (ESI) calcd. for C<sub>20</sub>H<sub>19</sub>F<sub>3</sub>N<sub>2</sub>O<sub>4</sub>Na ([M+Na]<sup>+</sup>): 431.1189, found: 431.1184.

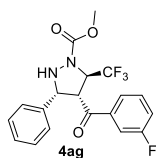

**(3R,4R,5R)-methyl 4-(3-fluorobenzoyl)-3-phenyl-5-(trifluoromethyl)pyrazolidine-1-carboxylate (4ag):** White solid; 76% yield, 90% ee, >20:1 dr; m.p.: 75.8 – 76.5 °C;  $[\alpha]_D^{19} = -18.4$  (c 1.0, CHCl<sub>3</sub>); **HPLC** CHIRALPAK IG, n-Hexane/2-propanol = 70/30, flow rate = 1.0 mL/min,  $\lambda = 254$  nm, retention time: 6.472 min (major), 9.578 min (minor); **<sup>1</sup>H NMR** (600 MHz, CDCl<sub>3</sub>)  $\delta$  7.45 (d, J = 7.7 Hz, 1H), 7.38 – 7.30 (m, 1H), 7.30 – 7.22 (m, 1H), 7.23 – 7.12 (m, 1H), 7.14 – 7.03 (m, 3H), 6.85 – 6.76 (m, 2H), 5.72 – 5.59 (m, 1H), 5.17 (s, 1H), 4.98 (d, J = 8.2 Hz, 1H), 4.68 (dd, J = 8.2, 5.0 Hz, 1H), 3.81 (s, 3H); **<sup>13</sup>C{<sup>1</sup>H} NMR** (151 MHz, CDCl<sub>3</sub>)  $\delta$  192.9, 162.8 (d, J = 248.9 Hz), 157.0, 138.4 (d, J = 6.6 Hz), 135.7, 130.5 (d, J = 7.7 Hz), 128.7, 128.5, 127.4, 125.4 (q, J = 281.6 Hz), 123.9 (d, J = 2.5 Hz), 120.8 (d, J = 21.8 Hz), 115.0 (d, J = 22.3 Hz), 66.4, 61.8 (q, J = 31.7 Hz), 56.4, 54.1; **<sup>19</sup>F{<sup>1</sup>H} NMR** (565 MHz, CDCl<sub>3</sub>)  $\delta$  -74.54, -111.15; **HRMS** (ESI) calcd. for C<sub>19</sub>H<sub>16</sub>F<sub>4</sub>N<sub>2</sub>O<sub>3</sub>Na ([M+Na]<sup>+</sup>): 419.0989, found: 419.0985.

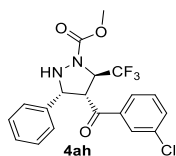

**(3R,4R,5R)-methyl 4-(3-chlorobenzoyl)-3-phenyl-5-(trifluoromethyl)pyrazolidine-1-carboxylate (4ah):** White solid; 70% yield, 87% ee, >20:1 dr; m.p.: 178.4 – 178.9 °C;  $[\alpha]_D^{19} = -20.5$  (c 1.0, CHCl<sub>3</sub>); **HPLC** CHIRALPAK IG, n-Hexane/2-propanol = 70/30, flow rate = 1.0 mL/min,  $\lambda = 254$  nm, retention time: 6.180 min (major), 10.003 min (minor); **<sup>1</sup>H NMR** (600 MHz, CDCl<sub>3</sub>)  $\delta$  7.57 – 7.53 (m, 2H), 7.50 (d, J = 7.7 Hz, 1H), 7.47 – 7.42 (m, 1H), 7.32 – 7.24 (m, 1H), 7.16 – 7.02 (m, 3H), 6.85 – 6.78 (m, 2H), 5.78 – 5.61 (m, 2H), 5.17 (s, 1H), 4.98 (d, J = 8.2 Hz, 1H), 4.67 (dd, J = 8.2, 5.0 Hz, 1H), 3.81 (s, 3H); **<sup>13</sup>C{<sup>1</sup>H} NMR** (150 MHz, CDCl<sub>3</sub>)  $\delta$  192.8, 157.4, 137.9, 135.7, 135.1, 133.6, 130.1, 128.7, 128.5, 128.2, 127.4, 126.2, 125.4 (q, J = 279.4 Hz), 66.3, 61.8 (q, J = 31.3 Hz), 56.4, 54.0; **<sup>19</sup>F{<sup>1</sup>H} NMR** (565 MHz, CDCl<sub>3</sub>)  $\delta$  -74.51; **HRMS** (ESI) calcd. for C<sub>19</sub>H<sub>16</sub>ClF<sub>3</sub>N<sub>2</sub>O<sub>3</sub>Na ([M+Na]<sup>+</sup>): 435.0694, found: 435.0688.

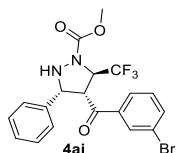

**(3R,4R,5R)-methyl 4-(3-bromobenzoyl)-3-phenyl-5-(trifluoromethyl)pyrazolidine-1-carboxylate (4ai):** White solid; 65% yield, 88% ee, >20:1 dr; m.p.: 94.7 – 95.5 °C;  $[\alpha]_D^{18} = -20.0$  (c 1.0, CHCl<sub>3</sub>); **HPLC** CHIRALPAK IG, n-Hexane/2-propanol = 70/30, flow rate = 1.0 mL/min,  $\lambda = 254$  nm, retention time: 6.133 min (major), 10.093 min (minor); **<sup>1</sup>H NMR** (400 MHz, CDCl<sub>3</sub>)  $\delta$  7.71 – 7.67 (m, 1H), 7.62 – 7.58 (m, 1H), 7.56 – 7.52 (m, 1H), 7.27 – 7.18 (m, 1H), 7.14 – 7.05 (m, 3H), 6.88 – 6.78 (m, 2H), 5.64 (s, 1H), 5.17 (d, J = 6.6 Hz, 1H), 5.02 – 4.93 (m, 1H), 4.65 (dd, J = 8.3, 5.0 Hz, 1H), 3.82 (s, 3H); **<sup>13</sup>C{<sup>1</sup>H} NMR** (151 MHz, CDCl<sub>3</sub>)  $\delta$  192.8, 157.1, 138.1, 136.5, 135.7, 131.1, 130.3, 128.7, 128.5, 127.4, 126.6, 125.4 (q, J = 281.6 Hz), 123.0, 66.3, 61.7 (q, J = 31.5 Hz), 56.4, 54.0; **<sup>19</sup>F{<sup>1</sup>H} NMR** (565 MHz, CDCl<sub>3</sub>)  $\delta$  -74.51; **HRMS** (ESI) calcd. for C<sub>19</sub>H<sub>16</sub>BrF<sub>3</sub>N<sub>2</sub>O<sub>3</sub>Na ([M+Na]<sup>+</sup>): 479.0189, found: 479.0183.

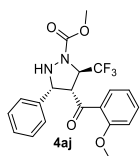

**(3R,4R,5R)-methyl 4-(2-methoxybenzoyl)-3-phenyl-5-(trifluoromethyl)pyrazolidine-1-carboxylate (4aj):** White solid; 56% yield, 95% ee, >20:1 dr; m.p.: 43.2 – 43.8 °C;  $[\alpha]_D^{18} = -11.3$  (c 1.0, CHCl<sub>3</sub>); **HPLC** CHIRALPAK IG, n-Hexane/2-propanol = 70/30, flow rate = 1.0 mL/min,  $\lambda = 254$  nm, retention time: 12.953 min (major), 24.640 min (minor); **<sup>1</sup>H NMR** (400 MHz, CDCl<sub>3</sub>)  $\delta$  7.40 – 7.30 (m, 1H), 7.15 – 7.02 (m, 3H), 6.93 – 6.78 (m, 4H), 6.78 – 6.63 (m, 1H), 5.54 (s, 1H), 5.11 (d, J = 7.4 Hz, 1H), 4.98 (dd, J = 7.9, 4.7 Hz, 1H), 4.87 (t, J = 7.6 Hz, 1H), 3.93 (s, 3H), 3.81 (s, 3H); **<sup>13</sup>C{<sup>1</sup>H} NMR** (100 MHz, CDCl<sub>3</sub>)  $\delta$  196.4, 157.7, 157.1, 136.6, 134.1, 130.8, 128.5, 128.1, 127.7, 127.2, 125.6 (q, J = 279.8 Hz), 121.0, 111.3, 65.6, 62.0 (q, J = 31.5 Hz), 59.9, 55.9, 53.9; **<sup>19</sup>F{<sup>1</sup>H} NMR** (376 MHz, CDCl<sub>3</sub>)  $\delta$  -74.57; **HRMS** (ESI) calcd. for C<sub>20</sub>H<sub>19</sub>F<sub>3</sub>N<sub>2</sub>O<sub>4</sub>Na ([M+Na]<sup>+</sup>): 431.1189, found: 431.1184.



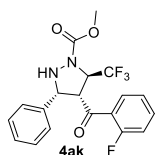

**(3R,4R,5R)-methyl 4-(2-fluorobenzoyl)-3-phenyl-5-(trifluoromethyl)pyrazolidine-1-carboxylate (4ak):** White solid; 73% yield, 90% ee, >20:1 dr; m.p.: 30.1 – 30.8 °C;  $[\alpha]_D^{18} = -10.5$  (c 1.0, CHCl<sub>3</sub>); **HPLC** CHIRALPAK IG, n-Hexane/2-propanol = 70/30, flow rate = 1.0 mL/min,  $\lambda = 254$  nm, retention time: 9.063 min (major), 14.752 min (minor); **<sup>1</sup>H NMR** (400 MHz, CDCl<sub>3</sub>)  $\delta$  7.48 – 7.38 (m, 1H), 7.25 – 7.16 (m, 1H), 7.11 – 7.02 (m, 4H), 7.01 – 6.92 (m, 1H), 6.87 – 6.77 (m, 2H), 5.73 (s, 1H), 5.16 – 5.06 (m, 1H), 5.04 – 4.87 (m, 1H), 4.81 – 4.68 (m, 1H), 3.79 (s, 3H); **<sup>13</sup>C{<sup>1</sup>H} NMR** (100 MHz, CDCl<sub>3</sub>)  $\delta$  191.7, 160.9 (d, J = 251.0 Hz), 157.2, 136.6, 135.2 (d, J = 9.4 Hz), 131.0 (d, J = 2.2 Hz), 128.6, 128.3, 127.2, 125.5 (q, J = 279.5 Hz), 125.0 (d, J = 12.0 Hz), 124.8 (d, J = 3.5 Hz), 116.4 (d, J = 23.4 Hz), 65.5, 61.4 (q, J = 31.3 Hz), 60.7 (d, J = 7.4 Hz), 53.9; **<sup>19</sup>F{<sup>1</sup>H} NMR** (376 MHz, CDCl<sub>3</sub>)  $\delta$  -74.78, -111.69; **HRMS** (ESI) calcd. for C<sub>19</sub>H<sub>16</sub>F<sub>4</sub>N<sub>2</sub>O<sub>3</sub>Na ([M+Na]<sup>+</sup>): 419.0989, found: 419.0982.

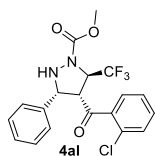

**(3R,4R,5R)-methyl 4-(2-chlorobenzoyl)-3-phenyl-5-(trifluoromethyl)pyrazolidine-1-carboxylate (4al):** White solid; 63% yield, 82% ee, >20:1 dr; m.p.: 106.4 – 107.2 °C;  $[\alpha]_D^{18} = -34.8$  (c 1.0, CHCl<sub>3</sub>); **HPLC** CHIRALPAK IG, n-Hexane/2-propanol = 70/30, flow rate = 1.0 mL/min,  $\lambda = 254$  nm, retention time: 7.820 min (major), 13.813 min (minor); **<sup>1</sup>H NMR** (400 MHz, CDCl<sub>3</sub>)  $\delta$  7.33 – 7.23 (m, 2H), 7.22 – 7.09 (m, 3H), 7.05 – 6.93 (m, 1H), 6.88 – 6.80 (m, 2H), 6.51 – 6.35 (m, 1H), 5.68 – 5.51 (m, 1H), 5.10 (s, 1H), 4.98 (dd, J = 8.0, 4.9 Hz, 1H), 4.80 (d, J = 8.0 Hz, 1H), 3.77 (s, 3H); **<sup>13</sup>C{<sup>1</sup>H} NMR** (100 MHz, CDCl<sub>3</sub>)  $\delta$  196.7, 157.2, 137.8, 136.2, 132.4, 130.7, 130.3, 129.9, 128.9, 128.5, 127.4, 126.9, 125.4 (q, J = 279.7 Hz), 65.4, 61.8 (q, J = 31.7 Hz), 62.0, 59.3, 53.9; **<sup>19</sup>F{<sup>1</sup>H} NMR** (376 MHz, CDCl<sub>3</sub>)  $\delta$  -74.49; **HRMS** (ESI) calcd. for C<sub>19</sub>H<sub>16</sub>ClF<sub>3</sub>N<sub>2</sub>O<sub>3</sub>Na ([M+Na]<sup>+</sup>): 435.0694, found: 435.0683.

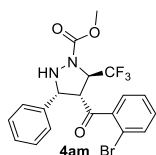

**(3R,4R,5R)-methyl**

**4-(2-bromobenzoyl)-3-phenyl-5-**

**(trifluoromethyl)pyrazolidine-1-carboxylate (4am):** White solid; 62% yield, 88% ee, >20:1 dr; m.p.: 41.2 – 42.0 °C;  $[\alpha]_D^{18} = -20.6$  (c 1.0, CHCl<sub>3</sub>); **HPLC** CHIRALPAK IG, n-Hexane/2-propanol = 70/30, flow rate = 1.0 mL/min,  $\lambda = 254$  nm, retention time: 8.397 min (major), 15.163 min (minor); **<sup>1</sup>H NMR** (600 MHz, CDCl<sub>3</sub>)  $\delta$  7.80 – 7.63 (m, 1H), 7.63 – 7.58 (m, 1H), 7.57 – 7.51 (m, 1H), 7.24 – 7.18 (m, 1H), 7.14 – 7.04 (m, 3H), 6.85 – 6.78 (m, 2H), 5.65 (s, 1H), 5.22 – 5.10 (m, 1H), 5.02 – 4.95 (m, 1H), 4.71 – 4.60 (m, 1H), 3.82 (s, 3H); **<sup>13</sup>C{<sup>1</sup>H} NMR** (151 MHz, CDCl<sub>3</sub>)  $\delta$  192.8, 157.0, 138.1, 136.5, 135.7, 131.2, 130.3, 128.7, 128.5, 127.3, 126.3, 125.4 (q, J = 281.5 Hz), 123.1, 66.3, 61.8 (q, J = 31.5 Hz) 56.4, 54.1; **<sup>19</sup>F{<sup>1</sup>H} NMR** (565 MHz, CDCl<sub>3</sub>)  $\delta$  -74.51; **HRMS** (ESI) calcd. for C<sub>19</sub>H<sub>16</sub>BrF<sub>3</sub>N<sub>2</sub>O<sub>3</sub>Na ([M+Na]<sup>+</sup>): 479.0189, found: 479.0192.

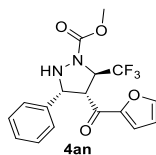

**(3R,4R,5R)-methyl**

**4-(furan-2-carbonyl)-3-phenyl-5-**

**(trifluoromethyl)pyrazolidine-1-carboxylate (4an):** White solid; 71% yield, 93% ee, >20:1 dr; m.p.: 130.4 – 130.9 °C;  $[\alpha]_D^{19} = -27.8$  (c 1.0, CHCl<sub>3</sub>); **HPLC** CHIRALPAK OD-H, n-Hexane/2-propanol = 70/30, flow rate = 1.0 mL/min,  $\lambda = 254$  nm, retention time: 5.570 min (major), 6.525 min (minor); **<sup>1</sup>H NMR** (600 MHz, CDCl<sub>3</sub>)  $\delta$  7.51 – 7.44 (m, 1H), 7.10 – 7.03 (m, 3H), 6.98-6.89(m, 1H), 6.86 – 6.78 (m, 2H), 6.41-6.31 (m, 1H), 5.59 (s, 1H), 5.13 – 4.96 (m, 2H), 4.60-4.43 (m, 1H), 3.72 (s, 3H); **<sup>13</sup>C{<sup>1</sup>H} NMR** (151 MHz, CDCl<sub>3</sub>)  $\delta$  182.0, 157.4, 151.9, 146.5, 136.3, 128.7, 128.4, 127.0, 125.4 (q, J = 281.1 Hz), 118.2, 113.2, 66.1, 60.8 (q, J = 31.9 Hz), 56.8, 54.0; **<sup>19</sup>F{<sup>1</sup>H} NMR** (565 MHz, CDCl<sub>3</sub>)  $\delta$  -74.70; **HRMS** (ESI) calcd. for C<sub>17</sub>H<sub>15</sub>F<sub>3</sub>N<sub>2</sub>O<sub>4</sub>Na ([M+Na]<sup>+</sup>): 391.0876, found: 391.0865.

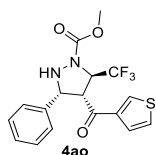

**(3R,4R,5R)-methyl 3-phenyl-4-(thiophene-3-carbonyl)-5-(trifluoromethyl)pyrazolidine-1-carboxylate (4ao):** White solid; 65% yield, 95% ee, >20:1 dr; m.p.: 166.8 – 167.2 °C;  $[\alpha]_D^{17} = -35.5$  (c 1.0, CHCl<sub>3</sub>); **HPLC** CHIRALPAK IG, n-Hexane/2-propanol = 70/30, flow rate = 1.0 mL/min,  $\lambda = 254$  nm, retention time: 10.708 min (major), 12.068 min (minor); **<sup>1</sup>H NMR** (600 MHz, CDCl<sub>3</sub>)  $\delta$  7.92 – 7.80 (m, 1H), 7.33 – 7.24 (m, 1H), 7.24 – 7.19 (m, 1H), 7.13 – 7.09 (m, 3H), 6.91 – 6.88 (m, 2H), 5.75 – 5.41 (m, 1H), 5.17 (s, 1H), 4.98 (d, J = 8.0 Hz, 1H), 4.52 (dd, J = 8.0, 4.7 Hz, 1H), 3.82 (s, 3H); **<sup>13</sup>C{<sup>1</sup>H} NMR** (150 MHz, CDCl<sub>3</sub>)  $\delta$  187.8, 157.2, 141.4, 135.6, 132.9, 128.6, 128.4, 127.3, 127.0, 126.8, 125.4 (q, J = 281.8 Hz), 66.4, 61.8 (q, J = 31.7 Hz), 57.2, 54.0; **<sup>19</sup>F{<sup>1</sup>H} NMR** (565 MHz, CDCl<sub>3</sub>)  $\delta$  -74.43; **HRMS** (ESI) calcd. for C<sub>17</sub>H<sub>15</sub>F<sub>3</sub>N<sub>2</sub>O<sub>3</sub>SNa ([M+Na]<sup>+</sup>): 407.0648, found: 407.0647.

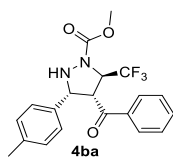

**(3R,4R,5R)-methyl 4-benzoyl-3-(p-tolyl)-5-(trifluoromethyl)pyrazolidine-1-carboxylate (4ba):** White solid; 83% yield, 95% ee, >20:1 dr; m.p.: 192.4 – 193.3 °C;  $[\alpha]_D^{27} = -39.4$  (c 1.0, CHCl<sub>3</sub>); **HPLC** CHIRALPAK IG, n-Hexane/2-propanol = 70/30, flow rate = 1.0 mL/min,  $\lambda = 254$  nm, retention time: 7.550 min (major), 17.032 min (minor); **<sup>1</sup>H NMR** (400 MHz, CDCl<sub>3</sub>)  $\delta$  7.77 – 7.56 (m, 2H), 7.56 – 7.42 (m, 1H), 7.35 (t, J = 7.7 Hz, 2H), 6.86 (d, J = 7.8 Hz, 2H), 6.69 (d, J = 7.9 Hz, 2H), 5.74 – 5.58 (m, 1H), 4.94 (d, J = 8.0 Hz, 1H), 4.71 (dd, J = 8.0, 5.3 Hz, 1H), 3.80 (s, 3H), 2.16 (s, 3H); **<sup>13</sup>C{<sup>1</sup>H} NMR** (100 MHz, CDCl<sub>3</sub>)  $\delta$  193.9, 157.2, 138.1, 136.4, 133.7, 132.7, 129.2, 128.8, 128.2, 127.2, 125.5 (q, J = 282.4 Hz), 66.2, 61.8 (q, J = 31.8 Hz), 56.3, 54.0, 21.1; **<sup>19</sup>F{<sup>1</sup>H} NMR** (376 MHz, CDCl<sub>3</sub>)  $\delta$  -74.53; **HRMS** (ESI) calcd. for C<sub>20</sub>H<sub>19</sub>F<sub>3</sub>N<sub>2</sub>O<sub>3</sub>Na ([M+Na]<sup>+</sup>): 415.1240, found: 415.1232.

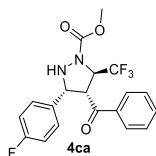

**(3R,4R,5R)-methyl 4-benzoyl-3-(4-fluorophenyl)-5-(trifluoromethyl)pyrazolidine-1-carboxylate (4ca):** White solid; 63% yield, 92% ee, >20:1 dr; m.p.: 143.1 – 143.5 °C;  $[\alpha]_D^{19} = -23.4$  (c 1.0, CHCl<sub>3</sub>); **HPLC** CHIRALPAK IG, n-Hexane/2-propanol = 70/30, flow rate = 1.0 mL/min,  $\lambda = 254$  nm, retention time: 7.387 min (major), 12.130 min (minor); **<sup>1</sup>H NMR** (400 MHz, CDCl<sub>3</sub>)  $\delta$  7.82 – 7.58 (m, 2H), 7.56 – 7.48 (m, 1H), 7.41 – 7.32 (m, 2H), 6.89 – 6.67 (m, 4H), 5.79 – 5.59 (m, 1H), 4.98 (d, J = 8.3 Hz, 1H), 4.74 (dd, J = 8.3, 5.1 Hz, 1H), 3.82 (s, 3H); **<sup>13</sup>C{<sup>1</sup>H} NMR** (101 MHz, CDCl<sub>3</sub>)  $\delta$  193.7, 162.4 (d, J = 248.7 Hz), 157.1, 136.2, 134.0, 132.0 (d, J = 3.5 Hz), 129.2 (d, J = 8.2 Hz), 128.9, 128.2, 125.5 (q, J = 282.5 Hz), 115.5 (d, J = 21.8 Hz), 65.7, 61.7 (q, J = 31.7 Hz), 56.1, 54.1; **<sup>19</sup>F{<sup>1</sup>H} NMR** (376 MHz, CDCl<sub>3</sub>)  $\delta$  -74.58, -113.28; **HRMS** (ESI) calcd. for C<sub>19</sub>H<sub>16</sub>F<sub>4</sub>N<sub>2</sub>O<sub>3</sub>Na ([M+Na]<sup>+</sup>): 419.0989, found: 419.0981.

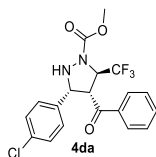

**(3R,4R,5R)-methyl 4-benzoyl-3-(4-chlorophenyl)-5-(trifluoromethyl)pyrazolidine-1-carboxylate (4da):** White solid; 63% yield, 92% ee, >20:1 dr; m.p.: 103.2 – 103.9 °C;  $[\alpha]_D^{19} = -31.4$  (c 1.0, CHCl<sub>3</sub>); **HPLC** CHIRALPAK IG, n-Hexane/2-propanol = 70/30, flow rate = 1.0 mL/min,  $\lambda = 254$  nm, retention time: 7.380 min (major), 13.887 min (minor); **<sup>1</sup>H NMR** (400 MHz, CDCl<sub>3</sub>)  $\delta$  7.74 – 7.62 (m, 2H), 7.58 – 7.48 (m, 1H), 7.42 – 7.32 (m, 2H), 7.11 – 6.96 (m, 2H), 6.81 – 6.69 (m, 2H), 5.74 – 5.54 (m, 1H), 5.17 (s, 1H), 4.97 (d, J = 8.3 Hz, 1H), 4.75 (dd, J = 8.3, 5.2 Hz, 1H), 3.82 (s, 3H); **<sup>13</sup>C{<sup>1</sup>H} NMR** (101 MHz, CDCl<sub>3</sub>)  $\delta$  193.5, 154.8, 136.2, 134.6, 134.3, 134.1, 129.0, 128.8, 128.8, 128.2, 125.4 (q, J = 282.9 Hz), 65.7, 61.8 (q, J = 32.2 Hz), 56.07, 54.11; **<sup>19</sup>F{<sup>1</sup>H} NMR** (376 MHz, CDCl<sub>3</sub>)  $\delta$  -74.55; **HRMS** (ESI) calcd. for C<sub>19</sub>H<sub>16</sub>ClF<sub>3</sub>N<sub>2</sub>O<sub>3</sub>Na ([M+Na]<sup>+</sup>): 435.0694, found: 435.0689.

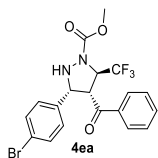

**(3R,4R,5R)-methyl 4-benzoyl-3-(4-bromophenyl)-5-(trifluoromethyl)pyrazolidine-1-carboxylate (4ea):** White solid; 61% yield, 97% ee, >20:1 dr; m.p.: 197.0 – 197.9 °C;  $[\alpha]_D^{22} = -68.6$  (c 1.0, CHCl<sub>3</sub>); **HPLC** CHIRALPAK IG, n-Hexane/2-propanol = 70/30, flow rate = 1.0 mL/min,  $\lambda = 254$  nm, retention time: 7.340 min (major), 10.197 min (minor); **<sup>1</sup>H NMR** (600 MHz, CDCl<sub>3</sub>)  $\delta$  7.67 (d, J = 7.4 Hz, 2H), 7.53 (t, J = 7.4 Hz, 1H), 7.38 (t, J = 7.7 Hz, 2H), 7.19 (d, J = 8.4 Hz, 2H), 6.70 (d, J = 8.2 Hz, 2H), 5.65 (s, 1H), 5.17 – 5.18 (m, 1H), 4.95 (t, J = 7.5 Hz, 1H), 4.76 (dd, J = 8.1, 5.2 Hz, 1H), 3.82 (s, 3H); **<sup>13</sup>C{<sup>1</sup>H} NMR** (150 MHz, CDCl<sub>3</sub>)  $\delta$  193.5, 157.2, 136.2, 135.1, 134.1, 131.7, 129.1, 129.0, 128.2, 125.4 (q, J = 279.7 Hz), 122.4, 65.75, 61.8 (q, J = 31.5 Hz), 56.0, 54; **<sup>19</sup>F{<sup>1</sup>H} NMR** (565 MHz, CDCl<sub>3</sub>)  $\delta$  -74.55; **HRMS** (ESI) calcd. for C<sub>19</sub>H<sub>16</sub>BrF<sub>3</sub>N<sub>2</sub>O<sub>3</sub>Na ([M+Na]<sup>+</sup>): 479.0189, found: 443.0185.

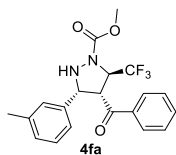

**(3R,4R,5R)-methyl 4-benzoyl-3-(m-tolyl)-5-(trifluoromethyl)pyrazolidine-1-carboxylate (4fa):** White solid; 53% yield, 93% ee, >20:1 dr; m.p.: 48.0 – 48.9 °C;  $[\alpha]_D^{22} = -34.1$  (c 1.0, CHCl<sub>3</sub>); **HPLC** CHIRALPAK IG, n-Hexane/2-propanol = 70/30, flow rate = 1.0 mL/min,  $\lambda = 254$  nm, retention time: 6.660 min (major), 11.283 min (minor); **<sup>1</sup>H NMR** (400 MHz, CDCl<sub>3</sub>)  $\delta$  7.69 – 7.59 (m, 2H), 7.54 – 7.45 (m, 1H), 7.40 – 7.30 (m, 2H), 6.99 – 6.84 (m, 2H), 6.65 – 6.58 (m, 2H), 5.70 – 5.52 (m, 1H), 5.17 (s, 1H), 5.00 – 4.87 (m, 1H), 4.76 – 4.60 (m, 1H), 3.81 (s, 3H), 2.09 (s, 3H); **<sup>13</sup>C{<sup>1</sup>H} NMR** (150 MHz, CDCl<sub>3</sub>)  $\delta$  194.0, 157.1, 138.2, 136.5, 135.6, 133.7, 129.0, 128.7, 128.5, 128.3, 128.2, 125.5 (q, J = 281.4 Hz), 124.2, 66.3, 61.7 (q, J = 31.3 Hz), 56.0, 54.0, 21.3; **<sup>19</sup>F{<sup>1</sup>H} NMR** (376 MHz, CDCl<sub>3</sub>)  $\delta$  -74.48; **HRMS** (ESI) calcd. for C<sub>20</sub>H<sub>19</sub>F<sub>3</sub>N<sub>2</sub>O<sub>3</sub>Na ([M+Na]<sup>+</sup>): 415.1240, found: 415.1230.

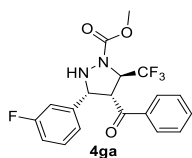

**(3R,4R,5R)-methyl 4-benzoyl-3-(3-fluorophenyl)-5-(trifluoromethyl)pyrazolidine-1-carboxylate (4ga):** Colorless oil; 68% yield, 94% ee, >20:1 dr;  $[\alpha]_D^{21} = -22.5$  (c 0.5, CHCl<sub>3</sub>); **HPLC** CHIRALPAK IG, n-Hexane/2-propanol = 70/30, flow rate = 1.0 mL/min,  $\lambda = 254$  nm, retention time: 7.023 min (major), 9.617 min (minor); **<sup>1</sup>H NMR** (400 MHz, CDCl<sub>3</sub>)  $\delta$  7.74 – 7.61 (m, 2H), 7.57 – 7.45 (m, 1H), 7.44 – 7.31 (m, 2H), 7.11 – 6.95 (m, 1H), 6.87 – 6.73 (m, 1H), 6.63 – 6.50 (m, 2H), 5.69 – 5.57 (m, 1H), 5.21 (s, 1H), 5.06 – 4.89 (m, 1H), 4.81 – 4.73 (m, 1H), 3.84 (s, 3H); **<sup>13</sup>C{<sup>1</sup>H} NMR** (101 MHz, CDCl<sub>3</sub>)  $\delta$  193.6, 162.6 (d, J=248.0 Hz), 156.9, 138.4 (d, J=7.2 Hz), 136.3, 134.1, 130.2 (d, J=8.7 Hz), 129.0, 128.2, 125.4 (q, J=283.0 Hz), 122.9 (d, J=3.1 Hz), 115.3 (d, J=20.9 Hz), 114.8 (d, J=22.6 Hz), 65.8, 61.9 (q, J=31.6 Hz), 55.9, 54.1; **<sup>19</sup>F{<sup>1</sup>H} NMR** (376 MHz, CDCl<sub>3</sub>)  $\delta$  -74.53, -112.12; **HRMS** (ESI) calcd. for C<sub>19</sub>H<sub>16</sub>F<sub>4</sub>N<sub>2</sub>O<sub>3</sub>Na ([M+Na]<sup>+</sup>): 419.0989, found: 419.0981.

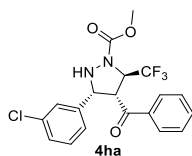

**(3R,4R,5R)-methyl 4-benzoyl-3-(3-chlorophenyl)-5-(trifluoromethyl)pyrazolidine-1-carboxylate (4ha):** White solid; 51% yield, 93% ee, >20:1 dr; m.p.: 168.5 – 168.9 °C;  $[\alpha]_D^{22} = -3.6$  (c 1.0, CHCl<sub>3</sub>); **HPLC** CHIRALPAK IG, n-Hexane/2-propanol = 70/30, flow rate = 1.0 mL/min,  $\lambda = 254$  nm, retention time: 7.722 min (major), 13.908 min (minor); **<sup>1</sup>H NMR** (600 MHz, CDCl<sub>3</sub>)  $\delta$  7.73 – 7.63 (m, 2H), 7.57 – 7.49 (m, 1H), 7.43 – 7.34 (m, 2H), 7.09 – 6.95 (m, 2H), 6.86 – 6.80 (m, 1H), 6.77 – 6.66 (m, 1H), 5.62 (s, 1H), 5.17 (d, J=6.8 Hz, 1H), 4.95 (t, J=7.4 Hz, 1H), 4.76 (dd, J=8.3, 4.9 Hz, 1H), 3.85 (s, 3H); **<sup>13</sup>C{<sup>1</sup>H} NMR** (151 MHz, CDCl<sub>3</sub>)  $\delta$  193.7, 157.0, 138.0, 136.3, 134.4, 134.1, 130.0, 129.0, 128.5, 128.2, 128.0, 125.4 (q, J=281.8 Hz) 125.2, 65.7, 61.9 (q, J=31.3 Hz), 55.8, 54.1; **<sup>19</sup>F{<sup>1</sup>H} NMR** (376 MHz, CDCl<sub>3</sub>)  $\delta$  -74.50; **HRMS** (ESI) calcd. for C<sub>19</sub>H<sub>16</sub>ClF<sub>3</sub>N<sub>2</sub>O<sub>3</sub>Na ([M+Na]<sup>+</sup>): 435.0694, found: 435.0683.

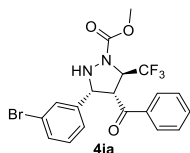

**(3R,4R,5R)-methyl 4-benzoyl-3-(3-bromophenyl)-5-(trifluoromethyl)pyrazolidine-1-carboxylate (4ia):** White solid; 59% yield, 93% ee, >20:1 dr; m.p.: 119.8 – 120.5 °C;  $[\alpha]_D^{21} = -13.5$  (c 1.0, CHCl<sub>3</sub>); **HPLC** CHIRALPAK IG, n-Hexane/2-propanol = 70/30, flow rate = 1.0 mL/min,  $\lambda = 254$  nm, retention time: 7.193 min (major), 9.143 min (minor); **<sup>1</sup>H NMR** (400 MHz, CDCl<sub>3</sub>)  $\delta$  7.73 – 7.62 (m, 2H), 7.58 – 7.50 (m, 1H), 7.45 – 7.35 (m, 2H), 7.25 – 7.18 (m, 1H), 7.01 – 6.90 (m, 2H), 6.82 – 6.73 (m, 1H), 5.62 (s, 1H), 5.21 – 5.10 (m, 1H), 5.00 – 4.89 (m, 1H), 4.82 – 4.67 (m, 1H), 3.85 (s, 3H); **<sup>13</sup>C{<sup>1</sup>H} NMR** (101 MHz, CDCl<sub>3</sub>)  $\delta$  193.7, 157.0, 138.3, 136.3, 134.1, 131.4, 130.9, 130.1, 129.0, 128.2, 125.6, 125.4 (q, J = 282.4 Hz), 122.5, 65.6, 61.8 (q, J = 31.8 Hz), 55.8, 54.1; **<sup>19</sup>F{<sup>1</sup>H} NMR** (376 MHz, CDCl<sub>3</sub>)  $\delta$  -74.52; **HRMS** (ESI) calcd. for C<sub>19</sub>H<sub>16</sub>BrF<sub>3</sub>N<sub>2</sub>O<sub>3</sub>Na ([M+Na]<sup>+</sup>): 479.0189, found: 479.0177.

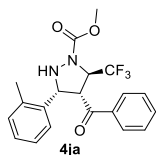

**(3R,4R,5R)-methyl 4-benzoyl-3-(o-tolyl)-5-(trifluoromethyl)pyrazolidine-1-carboxylate (4ja):** White solid; 51% yield, 93% ee, >20:1 dr; m.p.: 172.3 – 172.8 °C;  $[\alpha]_D^{18} = -12.0$  (c 1.0, CHCl<sub>3</sub>); **HPLC** CHIRALPAK IG, n-Hexane/2-propanol = 70/30, flow rate = 1.0 mL/min,  $\lambda = 254$  nm, retention time: 7.722 min (major), 13.908 min (minor); **<sup>1</sup>H NMR** (400 MHz, CDCl<sub>3</sub>)  $\delta$  7.64 – 7.37 (m, 3H), 7.31 – 7.21 (m, 2H), 7.05 – 6.89 (m, 2H), 6.87 – 6.76 (m, 2H), 5.70 – 5.52 (m, 1H), 5.39 – 5.05 (m, 2H), 4.91 – 4.59 (m, 1H), 3.77 (s, 3H), 2.07 (s, 3H); **<sup>13</sup>C{<sup>1</sup>H} NMR** (101 MHz, CDCl<sub>3</sub>)  $\delta$  195.1, 157.2, 136.6, 135.4, 133.8, 133.5, 130.6, 128.6, 128.2, 127.8, 126.4, 126.0, 125.5 (q, J = 282.5 Hz), 62.3 (q, J = 31.7 Hz), 61.4, 54.7, 53.9, 19.7; **<sup>19</sup>F{<sup>1</sup>H} NMR** (376 MHz, CDCl<sub>3</sub>)  $\delta$  -74.51; **HRMS** (ESI) calcd. for C<sub>20</sub>H<sub>19</sub>F<sub>3</sub>N<sub>2</sub>O<sub>3</sub>Na ([M+Na]<sup>+</sup>): 415.1240, found: 415.1238.

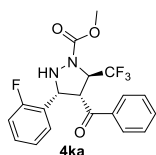

**(3R,4R,5R)-methyl 4-benzoyl-3-(2-fluorophenyl)-5-(trifluoromethyl)pyrazolidine-1-carboxylate (4ka):** White solid; 78% yield, 92% ee, >20:1 dr; m.p.: 187.0 – 187.5 °C;  $[\alpha]_D^{24} = -18.7$  (c 1.0, CHCl<sub>3</sub>); **HPLC** CHIRALPAK IG, n-Hexane/2-propanol = 70/30, flow rate = 1.0 mL/min,  $\lambda = 254$  nm, retention time: 8.073 min (major), 9.003 min (minor); **<sup>1</sup>H NMR** (600 MHz, CDCl<sub>3</sub>)  $\delta$  7.77 – 7.54 (m, 2H), 7.54 – 7.37 (m, 1H), 7.31 (t, J = 7.8 Hz, 2H), 7.09 – 7.00 (m, 1H), 6.99 – 6.88 (m, 2H), 6.70 – 6.58 (m, 2H), 5.59 (s, 1H), 5.43 – 5.35 (m, 1H), 5.24 – 5.19 (m, 1H), 4.86 – 4.78 (m, 1H), 3.83 (s, 3H); **<sup>13</sup>C{<sup>1</sup>H} NMR** (150 MHz, CDCl<sub>3</sub>)  $\delta$  194.4, 159.6 (d, J = 245.0 Hz), 157.05, 135.9, 133.9, 130.0 (d, J = 8.6 Hz), 128.7, 128.1, 128.0, 125.5 (q, J = 279.8 Hz), 124.5 (d, J = 3.3 Hz), 123.8 (d, J = 13.0 Hz), 115.1 (d, J = 22.0 Hz), 62.4 (q, J = 30.9 Hz), 58.6 (d, J = 31.3 Hz), 54.5, 54.0; **<sup>19</sup>F{<sup>1</sup>H} NMR** (565 MHz, CDCl<sub>3</sub>)  $\delta$  -74.48, -116.40; **HRMS** (ESI) calcd. for C<sub>19</sub>H<sub>16</sub>F<sub>4</sub>N<sub>2</sub>O<sub>3</sub>Na ([M+Na]<sup>+</sup>): 419.0989, found: 419.0993.

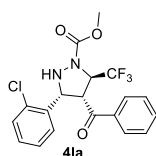

**(3R,4R,5R)-methyl 4-benzoyl-3-(2-chlorophenyl)-5-(trifluoromethyl)pyrazolidine-1-carboxylate (4la):** White solid; 77% yield, 82% ee, >20:1 dr; m.p.: 133.7 – 134.5 °C;  $[\alpha]_D^{22} = -30.6$  (c 1.0, CHCl<sub>3</sub>); **HPLC** CHIRALPAK IG, n-Hexane/2-propanol = 70/30, flow rate = 1.0 mL/min,  $\lambda = 254$  nm, retention time: 8.090 min (major), 9.645 min (minor); **<sup>1</sup>H NMR** (600 MHz, CDCl<sub>3</sub>)  $\delta$  7.70 – 7.55 (m, 1H), 7.46 – 7.42 (m, 0H), 7.31 – 7.25 (m, 1H), 7.17 – 7.12 (m, 1H), 7.10 – 7.05 (m, 1H), 6.99 – 6.95 (m, 2H), 5.57 (d, J = 8.2 Hz, 1H), 5.49 – 5.39 (m, 1H), 5.19 (s, 1H), 4.88 (dd, J = 8.1, 3.0 Hz, 1H), 3.86 (s, 1H); **<sup>13</sup>C{<sup>1</sup>H} NMR** (100 MHz, CDCl<sub>3</sub>)  $\delta$  195.7, 157.2, 136.0, 133.8 (two peaks), 133.2, 129.4, 129.30, 128.6, 128.4, 128.2, 127.2, 125.2 (q, J = 279.0 Hz), 63.1 (q, J = 31.5 Hz), 61.8, 54.0, 52.3; **<sup>19</sup>F{<sup>1</sup>H} NMR** (565 MHz, CDCl<sub>3</sub>)  $\delta$  -74.40; **HRMS** (ESI) calcd. for C<sub>19</sub>H<sub>16</sub>ClF<sub>3</sub>N<sub>2</sub>O<sub>3</sub>Na ([M+Na]<sup>+</sup>): 435.0694, found: 435.0689.



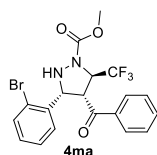

**(3R,4R,5R)-methyl 4-benzoyl-3-(2-bromophenyl)-5-(trifluoromethyl)pyrazolidine-1-carboxylate (4ma):** White solid; 77% yield, 84% ee, >20:1 dr; m.p.: 126.2 – 127.0 °C;  $[\alpha]_D^{27} = -16.7$  (c 1.0, CHCl<sub>3</sub>); **HPLC** CHIRALPAK IG, n-Hexane/2-propanol = 70/30, flow rate = 1.0 mL/min,  $\lambda = 254$  nm, retention time: 8.637 min (major), 10.467 min (minor); **<sup>1</sup>H NMR** (600 MHz, CDCl<sub>3</sub>)  $\delta$  7.70 – 7.54 (m, 2H), 7.49 – 7.40 (m, 1H), 7.33 – 7.22 (m, 2H), 7.23 – 7.06 (m, 3H), 6.98 – 6.77 (m, 1H), 5.55 (d, J = 8.1 Hz, 1H), 5.48 – 5.36 (m, 1H), 5.15 (s, 1H), 4.89 (dd, J = 8.1, 2.8 Hz, 1H), 3.88 (s, 3H); **<sup>13</sup>C{<sup>1</sup>H} NMR** (101 MHz, CDCl<sub>3</sub>)  $\delta$  195.8, 157.2, 135.9, 135.2, 133.8, 132.6, 129.7, 128.6 (two peaks), 128.2, 127.8, 125.2 (q, J = 282.6 Hz), 123.9, 64.4, 63.0 (q, J = 31.8 Hz), 54.1, 52.1; **<sup>19</sup>F{<sup>1</sup>H} NMR** (565 MHz, CDCl<sub>3</sub>)  $\delta$  -74.39; **HRMS** (ESI) calcd. for C<sub>19</sub>H<sub>16</sub>BrF<sub>3</sub>N<sub>2</sub>O<sub>3</sub>Na ([M+Na]<sup>+</sup>): 479.0189, found: 479.0180.

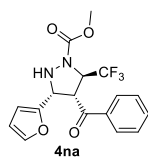

**(3R,4R,5R)-methyl 4-benzoyl-3-(furan-2-yl)-5-(trifluoromethyl)pyrazolidine-1-carboxylate (4na):** White solid; 81% yield, 94% ee, >20:1 dr; m.p.: 134.1 – 134.5 °C;  $[\alpha]_D^{19} = -55.8$  (c 1.0, CHCl<sub>3</sub>); **HPLC** CHIRALPAK IG, n-Hexane/2-propanol = 70/30, flow rate = 1.0 mL/min,  $\lambda = 254$  nm, retention time: 8.050 min (major), 10.410 min (minor); **<sup>1</sup>H NMR** (600 MHz, CDCl<sub>3</sub>)  $\delta$  7.81 (d, J = 7.6 Hz, 2H), 7.55 (t, J = 7.4 Hz, 1H), 7.42 (t, J = 7.6 Hz, 2H), 7.12 (s, 1H), 6.10 – 6.00 (m, 1H), 5.89 – 5.82 (m, 1H), 5.82 – 5.69 (m, 1H), 5.25 – 4.99 (m, 2H), 4.63 (t, J = 7.0 Hz, 1H), 3.77 (s, 3H); **<sup>13</sup>C{<sup>1</sup>H} NMR** (150 MHz, CDCl<sub>3</sub>)  $\delta$  191.8, 158.3, 149.2, 142.8, 136.1, 133.9, 128.9, 128.1, 125.6 (q, J = 279.0 Hz), 110.1, 109.0, 61.3 (q, J = 31.3 Hz), 59.9, 56.5, 54.0; **<sup>19</sup>F{<sup>1</sup>H} NMR** (565 MHz, CDCl<sub>3</sub>)  $\delta$  -74.79; **HRMS** (ESI) calcd. for C<sub>17</sub>H<sub>15</sub>F<sub>3</sub>N<sub>2</sub>O<sub>4</sub>Na ([M+Na]<sup>+</sup>): 391.0876, found: 391.0873.

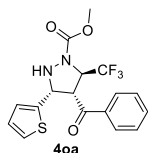

**(3R,4R,5R)-methyl 4-benzoyl-3-(thiophen-2-yl)-5-(trifluoromethyl)pyrazolidine-1-carboxylate (4oa):** White solid; 52% yield, 95% ee, >20:1 dr; m.p.: 79.6 – 80.4 °C;  $[\alpha]_D^{18} = -17.8$  (c 1.0, CHCl<sub>3</sub>); **HPLC** CHIRALPAK IG, n-Hexane/2-propanol = 70/30, flow rate = 1.0 mL/min,  $\lambda = 254$  nm, retention time: 8.637 min (major), 12.610 min (minor); **<sup>1</sup>H NMR** (600 MHz, CDCl<sub>3</sub>)  $\delta$  7.97 – 7.68 (m, 2H), 7.60 – 7.54 (m, 1H), 7.43 (t, J = 7.7 Hz, 2H), 7.06 (d, J = 5.0 Hz, 1H), 6.69 – 6.64 (m, 1H), 6.37 (d, J = 3.5 Hz, 1H), 5.79 – 5.68 (m, 1H), 5.29 (d, J = 7.9 Hz, 1H), 5.21 (s, 1H), 4.70 (t, J = 7.1 Hz, 1H), 3.83 (s, 3H); **<sup>13</sup>C{<sup>1</sup>H} NMR** (150 MHz, CDCl<sub>3</sub>)  $\delta$  192.0, 157.0, 137.5, 136.2, 134.0, 129.0, 128.3, 126.8, 126.4, 125.7, 125.6 (q, J = 278.7 Hz), 62.0, 60.6 (q, J = 31.6 Hz), 57.6, 54.0; **<sup>19</sup>F{<sup>1</sup>H} NMR** (565 MHz, CDCl<sub>3</sub>)  $\delta$  -74.55; **HRMS** (ESI) calcd. for C<sub>17</sub>H<sub>15</sub>F<sub>3</sub>N<sub>2</sub>O<sub>3</sub>SNa ([M+Na]<sup>+</sup>): 407.0648, found: 407.0639.

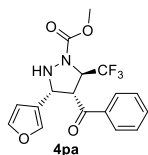

**(3R,4R,5R)-methyl 4-benzoyl-3-(furan-3-yl)-5-(trifluoromethyl)pyrazolidine-1-carboxylate (4pa):** White solid; 70% yield, 95% ee, >20:1 dr; m.p.: 48.3 – 48.9 °C;  $[\alpha]_D^{19} = -70.9$  (c 1.0, CHCl<sub>3</sub>); **HPLC** CHIRALPAK IG, n-Hexane/2-propanol = 70/30, flow rate = 1.0 mL/min,  $\lambda = 254$  nm, retention time: 7.683 min (major), 12.083 min (minor); **<sup>1</sup>H NMR** (600 MHz, CDCl<sub>3</sub>)  $\delta$  7.85 (d, J = 7.7 Hz, 2H), 7.58 (t, J = 7.4 Hz, 1H), 7.45 (t, J = 7.7 Hz, 2H), 7.22 – 7.11 (m, 1H), 6.98 (s, 1H), 5.85 (s, 1H), 5.75 – 5.62 (m, 1H), 4.98 (d, J = 7.7 Hz, 1H), 4.65 (t, J = 7.1 Hz, 1H), 3.80 (s, 3H); **<sup>13</sup>C{<sup>1</sup>H} NMR** (100 MHz, CDCl<sub>3</sub>)  $\delta$  192.4, 157.5, 143.6, 140.9, 136.2, 134.1, 129.2, 128.3, 125.5 (q, J = 279.4 Hz), 120.2, 109.0, 61.1 (q, J = 31.6 Hz), 58.8, 56.9, 54.0; **<sup>19</sup>F{<sup>1</sup>H} NMR** (565 MHz, CDCl<sub>3</sub>)  $\delta$  -74.67; **HRMS** (ESI) calcd. for C<sub>17</sub>H<sub>15</sub>F<sub>3</sub>N<sub>2</sub>O<sub>4</sub>Na ([M+Na]<sup>+</sup>): 391.0876, found: 391.0873.

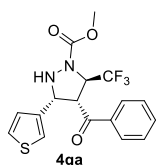

**(3R,4R,5R)-methyl 4-benzoyl-3-(thiophen-3-yl)-5-(trifluoromethyl)pyrazolidine-1-carboxylate (4qa):** White solid; 55% yield, 93% ee, >20:1 dr; m.p.: 94.7 – 95.5 °C;  $[\alpha]_D^{18} = -20.0$  (c 1.0, CHCl<sub>3</sub>); **HPLC** CHIRALPAK IG, n-Hexane/2-propanol = 70/30, flow rate = 1.0 mL/min,  $\lambda = 254$  nm, retention time: 8.850 min (major), 14.100 min (minor); **<sup>1</sup>H NMR** (600 MHz, CDCl<sub>3</sub>)  $\delta$  7.85 – 7.63 (m, 2H), 7.55 (t, J = 7.3 Hz, 1H), 7.41 (t, J = 7.6 Hz, 1H), 7.06 (dd, J = 5.0, 2.8 Hz, 1H), 6.80 – 6.70 (m, 1H), 6.51 (dd, J = 5.0, 1.3 Hz, 1H), 5.83 – 5.58 (m, 1H), 5.21 – 5.00 (m, 2H), 4.73 – 4.61 (m, 1H), 3.79 (s, 3H); **<sup>13</sup>C{<sup>1</sup>H} NMR** (150 MHz, CDCl<sub>3</sub>)  $\delta$  193.0, 157.4, 136.3, 136.1, 133.9, 129.0, 128.2, 126.5, 126.3, 125.5 (q, J = 279.3 Hz), 123.9, 62.2, 61.3 (q, J = 31.3 Hz), 56.8, 54.0; **<sup>19</sup>F{<sup>1</sup>H} NMR** (565 MHz, CDCl<sub>3</sub>)  $\delta$  -74.60; **HRMS** (ESI) calcd. for C<sub>17</sub>H<sub>15</sub>F<sub>3</sub>N<sub>2</sub>O<sub>3</sub>SNa ([M+Na]<sup>+</sup>): 407.0648, found: 407.0638.

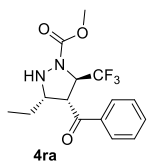

**(3S,4R,5R)-methyl 4-benzoyl-3-ethyl-5-(trifluoromethyl)pyrazolidine-1-carboxylate (4ra):** White solid; 68% yield, 92% ee, >20:1 dr; m.p.: 53.6 – 54.4 °C;  $[\alpha]_D^{18} = -31.3$  (c 1.0, CHCl<sub>3</sub>); **HPLC** CHIRALPAK IG, n-Hexane/2-propanol = 70/30, flow rate = 1.0 mL/min,  $\lambda = 254$  nm, retention time: 11.235 min (major), 8.057 min (minor); **<sup>1</sup>H NMR** (600 MHz, CDCl<sub>3</sub>)  $\delta$  8.10 – 7.93 (m, 2H), 7.68 – 7.61 (m, 1H), 7.56 – 7.48 (m, 2H), 5.59 – 5.44 (m, 1H), 4.59 (t, J = 6.9 Hz, 1H), 3.83 (s, 3H), 3.76 – 3.62 (m, 1H), 1.08 – 0.94 (m, 1H), 0.95 – 0.90 (m, 1H), 0.87 (t, J = 6.9 Hz, 3H); **<sup>13</sup>C{<sup>1</sup>H} NMR** (150 MHz, CDCl<sub>3</sub>)  $\delta$  192.8, 158.1, 135.9, 134.4, 129.3, 128.4, 125.7 (q, J = 278.8 Hz), 64.4, 61.3 (q, J = 31.2 Hz), 56.1, 53.9, 21.8, 11.3; **<sup>19</sup>F{<sup>1</sup>H} NMR** (565 MHz, CDCl<sub>3</sub>)  $\delta$  -74.86; **HRMS** (ESI) calcd. for C<sub>15</sub>H<sub>17</sub>F<sub>3</sub>N<sub>2</sub>O<sub>3</sub>Na ([M+Na]<sup>+</sup>): 353.1083, found: 353.1080.

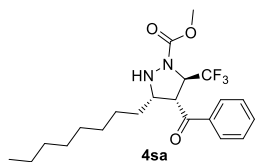

**(3*S*,4*R*,5*R*)-methyl 4-benzoyl-3-octyl-5-(trifluoromethyl)pyrazolidine-1-carboxylate (4sa):** White solid; 77% yield, 96% ee, >20:1 dr; m.p.: 87.5 – 88.1 °C;  $[\alpha]_D^{24} = -31.6$  (c 1.0, CHCl<sub>3</sub>); **HPLC** CHIRALPAK IG, n-Hexane/2-propanol = 70/30, flow rate = 1.0 mL/min,  $\lambda = 254$  nm, retention time: 13.447 min (major), 10.890 min (minor); **<sup>1</sup>H NMR** (600 MHz, CDCl<sub>3</sub>)  $\delta$  8.14 – 7.91 (m, 2H), 7.68 – 7.61 (m, 1H), 7.52 (t, J = 7.7 Hz, 2H), 5.59 – 5.44 (m, 1H), 4.58 (s, 1H), 4.40 (t, J = 6.9 Hz, 1H), 3.87 – 3.76 (m, 4H), 1.55 – 1.39 (m, 1H), 1.26 – 0.98 (m, 12H), 0.88 – 0.78 (m, 4H); **<sup>13</sup>C{<sup>1</sup>H} NMR** (151 MHz, CDCl<sub>3</sub>)  $\delta$  192.8, 158.1, 136.0, 134.3, 129.3, 128.4, 125.7 (q, J = 280.7 Hz), 62.8, 61.4 (q, J = 31.6 Hz), 56.0, 53.9, 31.9, 29.3, 29.2, 29.0, 28.4, 26.5, 22.7, 14.2; **<sup>19</sup>F{<sup>1</sup>H} NMR** (565 MHz, CDCl<sub>3</sub>)  $\delta$  -74.84; **HRMS** (ESI) calcd. for C<sub>21</sub>H<sub>29</sub>F<sub>3</sub>N<sub>2</sub>O<sub>3</sub>Na ([M+Na]<sup>+</sup>): 437.2022, found: 437.2012.

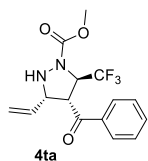

**(3*S*,4*R*,5*R*)-methyl 4-benzoyl-5-(trifluoromethyl)-3-vinylpyrazolidine-1-carboxylate (4ta):** White solid; 46% yield, 89% ee, >20:1 dr; m.p.: 36.4 – 36.8 °C;  $[\alpha]_D^{18} = -50.9$  (c 1.0, CHCl<sub>3</sub>); **HPLC** CHIRALPAK IG, n-Hexane/2-propanol = 70/30, flow rate = 1.0 mL/min,  $\lambda = 254$  nm, retention time: 9.958 min (major), 7.977 min (minor); **<sup>1</sup>H NMR** (400 MHz, CDCl<sub>3</sub>)  $\delta$  8.03 – 7.83 (m, 2H), 7.68 – 7.58 (m, 1H), 7.55 – 7.46 (m, 2H), 5.56 – 5.46 (m, 1H), 5.37 – 5.20 (m, 1H), 5.10 – 4.93 (m, 2H), 4.86 (d, J = 4.9 Hz, 1H), 4.58 – 4.49 (m, 1H), 4.45 – 4.33 (m, 1H), 3.84 (s, 3H); **<sup>13</sup>C{<sup>1</sup>H} NMR** (100 MHz, CDCl<sub>3</sub>)  $\delta$  192.5, 157.4, 136.1, 134.3, 130.7, 129.2, 128.6, 125.5 (q, J = 278.9 Hz), 119.6, 64.9, 61.1 (q, J = 31.5 Hz), 56.4, 54.0; **<sup>19</sup>F{<sup>1</sup>H} NMR** (376 MHz, CDCl<sub>3</sub>)  $\delta$  -74.67; **HRMS** (ESI) calcd. for C<sub>15</sub>H<sub>15</sub>F<sub>3</sub>N<sub>2</sub>O<sub>3</sub>Na ([M+Na]<sup>+</sup>): 351.0927, found: 351.0918.

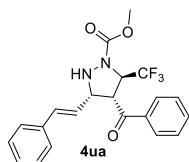

**(3S,4R,5R)-methyl 4-benzoyl-3-((E)-styryl)-5-(trifluoromethyl)pyrazolidine-1-carboxylate (4ua):** White solid; 54% yield, 82% ee, >20:1 dr; m.p.: 54.3 – 54.9 °C;  $[\alpha]_D^{17} = -71.1$  (c 1.0, CHCl<sub>3</sub>); **HPLC** CHIRALPAK IG, n-Hexane/2-propanol = 70/30, flow rate = 1.0 mL/min,  $\lambda = 254$  nm, retention time: 19.493 min (major), 21.760 min (minor); **<sup>1</sup>H NMR** (600 MHz, CDCl<sub>3</sub>)  $\delta$  8.01 – 7.86 (m, 2H), 7.68 – 7.57 (m, 1H), 7.53 – 7.39 (m, 2H), 7.24 – 7.14 (m, 3H), 7.08 – 6.98 (m, 2H), 6.33 (d, J = 15.7 Hz, 1H), 5.69 – 5.42 (m, 2H), 4.91 (s, 1H), 4.70 – 4.50 (m, 2H), 3.86 (s, 3H); **<sup>13</sup>C{<sup>1</sup>H} NMR** (150 MHz, CDCl<sub>3</sub>)  $\delta$  192.6, 157.5, 136.3, 135.9, 134.6, 134.3, 129.3, 128.6, 128.5, 128.3, 126.7, 125.5 (q, J = 278.8 Hz), 121.7, 64.5, 61.2 (q, J = 31.5 Hz), 56.5, 54.1; **<sup>19</sup>F{<sup>1</sup>H} NMR** (565 MHz, CDCl<sub>3</sub>)  $\delta$  -74.57; **HRMS** (ESI) calcd. for C<sub>21</sub>H<sub>19</sub>F<sub>3</sub>N<sub>2</sub>O<sub>3</sub>Na ([M+Na]<sup>+</sup>): 427.1240, found: 427.1232.

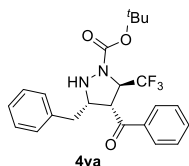

**(3S,4R,5R)-tert-butyl 4-benzoyl-3-benzyl-5-(trifluoromethyl)pyrazolidine-1-carboxylate (4va):** White solid; 50% yield, 95% ee; >20:1 dr; m.p.: 164.7 – 165.6 °C;  $[\alpha]_D^{17} = -43.2$  (c 1.0, CHCl<sub>3</sub>); **HPLC** CHIRALPAK OD-H, n-Hexane/2-propanol = 95/5, flow rate = 0.5 mL/min,  $\lambda = 254$  nm, retention time: 17.597 min (major), 11.930 min (minor); **<sup>1</sup>H NMR** (400 MHz, CDCl<sub>3</sub>)  $\delta$  8.08 – 7.95 (m, 2H), 7.66 (t, J = 7.4 Hz, 1H), 7.54 (t, J = 7.6 Hz, 2H), 7.21 – 7.12 (m, 3H), 7.11 – 7.05 (m, 2H), 5.72 – 5.46 (m, 1H), 4.44 (t, J = 6.9 Hz, 1H), 4.15 – 3.86 (m, 1H), 2.39 (dd, J = 14.2, 10.6 Hz, 1H), 2.15 (dd, J = 14.2, 3.2 Hz, 1H), 1.57 (s, 9H); **<sup>13</sup>C{<sup>1</sup>H} NMR** (100 MHz, CDCl<sub>3</sub>)  $\delta$  193.2, 155.9, 138.0, 136.1, 134.4, 129.6, 129.3, 128.5, 128.3, 126.7, 125.8 (q, J = 279.5 Hz), 82.3, 64.6, 61.4 (q, J = 31.1 Hz), 55.9, 34.9, 28.3; **<sup>19</sup>F{<sup>1</sup>H} NMR** (376 MHz, CDCl<sub>3</sub>)  $\delta$  -74.87; **HRMS** (ESI) calcd. for C<sub>23</sub>H<sub>25</sub>F<sub>3</sub>N<sub>2</sub>O<sub>3</sub>Na ([M+Na]<sup>+</sup>): 457.1709, found: 450.1702.

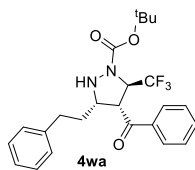

**(3*S*,4*R*,5*R*)-tert-butyl 4-benzoyl-3-phenethyl-5-(trifluoromethyl)pyrazolidine-1-carboxylate (4wa):** White solid; 80% yield, 86% ee; >20:1 dr; m.p.: 77.1 – 77.4 °C;  $[\alpha]_D^{18} = -26.1$  (c 1.0, CHCl<sub>3</sub>); **HPLC** CHIRALPAK OD – H, n–Hexane/2–propanol = 90/10, flow rate = 1.0 mL/min,  $\lambda = 254$  nm, retention time: 4.107 min (major), 5.720 min (minor); **<sup>1</sup>H NMR** (400 MHz, CDCl<sub>3</sub>)  $\delta$  7.98 – 7.84 (m, 2H), 7.71 – 7.56 (m, 1H), 7.49 (t, *J* = 7.8 Hz, 2H), 7.21 – 7.06 (m, 3H), 7.02 – 6.83 (m, 2H), 5.59 – 5.34 (m, 1H), 4.51 (s, 1H), 4.40 – 4.27 (m, 1H), 3.85 – 3.61 (m, 1H), 2.97 – 2.78 (m, 1H), 2.71 – 2.52 (m, 1H), 1.54 (s, 9H), 1.42 – 1.26 (m, 1H), 1.22 – 1.07 (m, 1H); **<sup>13</sup>C{<sup>1</sup>H} NMR** (100 MHz, CDCl<sub>3</sub>)  $\delta$  192.9, 156.4, 141.0, 136.0, 134.3, 129.3, 128.5, 128.4, 128.4, 126.01, 125.8 (q, *J* = 279.3 Hz), 82.2, 61.7, 61.4 (q, *J* = 30.5 Hz), 56.3, 32.4, 29.7, 28.3; **<sup>19</sup>F{<sup>1</sup>H} NMR** (376 MHz, CDCl<sub>3</sub>)  $\delta$  -74.98; **HRMS** (ESI) calcd. for C<sub>24</sub>H<sub>27</sub>F<sub>3</sub>N<sub>2</sub>O<sub>3</sub>Na ([M+Na]<sup>+</sup>): 471.1866, found: 471.1851.

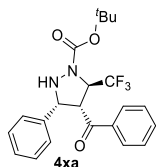

**(3*R*,4*R*,5*R*)-tert-butyl 4-benzoyl-3-phenyl-5-(trifluoromethyl)pyrazolidine-1-carboxylate (4xa):** White solid; 48% yield, 95% ee; >20:1 dr; m.p.: 158.4 – 159.3 °C;  $[\alpha]_D^{24} = -20.2$  (c 1.0, CHCl<sub>3</sub>); **HPLC** CHIRALPAK IH, n–Hexane/2–propanol = 90/10, flow rate = 1.0 mL/min,  $\lambda = 254$  nm, retention time: 7.627 min (major), 9.723 min (minor); **<sup>1</sup>H NMR** (400 MHz, CDCl<sub>3</sub>)  $\delta$  7.67 (d, *J* = 7.7 Hz, 2H), 7.50 (t, *J* = 7.4 Hz, 1H), 7.35 (t, *J* = 7.6 Hz, 2H), 7.12 – 6.97 (m, 3H), 6.91 – 6.77 (m, 2H), 5.60 – 5.45 (m, 1H), 5.17 (s, 1H), 4.93 (d, *J* = 8.1 Hz, 1H), 4.81 – 4.65 (m, 1H), 1.52 (s, 9H); **<sup>13</sup>C{<sup>1</sup>H} NMR** (100 MHz, CDCl<sub>3</sub>)  $\delta$  194.2, 155.1, 136.6, 136.2, 133.7, 128.8, 128.4, 128.2, 128.1, 127.5, 125.6 (q, *J* = 279.5 Hz), 82.40, 66.1, 61.7 (q, *J* = 31.2 Hz), 56.3, 28.3; **<sup>19</sup>F{<sup>1</sup>H} NMR** (376 MHz, CDCl<sub>3</sub>)  $\delta$  -74.43; **HRMS** (ESI) calcd. for C<sub>22</sub>H<sub>23</sub>F<sub>3</sub>N<sub>2</sub>O<sub>3</sub>Na ([M+Na]<sup>+</sup>): 443.1553, found: 443.1544.

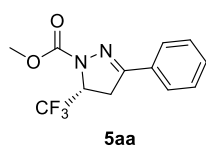

**(R)-methyl 3-phenyl-5-(trifluoromethyl)-4,5-dihydro-1H-pyrazole-1-carboxylate (5aa):** White solid; 84% yield, 98% ee; m.p.: 83.6 – 84.5 °C;  $[\alpha]_D^{19} = 97.9$  (c 1.0, CHCl<sub>3</sub>); **HPLC** CHIRALPAK IF, n-Hexane/2-propanol = 70/30, flow rate = 1.0 mL/min,  $\lambda = 254$  nm, retention time: 4.467 min (major), 4.850 min (minor); **<sup>1</sup>H NMR** (400 MHz, CDCl<sub>3</sub>)  $\delta$  7.83 – 7.68 (m, 2H), 7.50 – 7.36 (m, 3H), 5.11 – 4.98 (m, 1H), 3.92 (s, 3H), 3.56 (dd, J = 18.0, 11.7 Hz, 1H), 3.36 (dd, J = 18.0, 3.8 Hz, 1H); **<sup>13</sup>C{<sup>1</sup>H} NMR** (101 MHz, CDCl<sub>3</sub>)  $\delta$  154.9, 153.9, 131.1, 130.2, 128.9, 127.0, 124.4 (q, J = 280.3 Hz), 58.2 (q, J = 32.6 Hz), 54.0, 34.6; **<sup>19</sup>F{<sup>1</sup>H} NMR** (376 MHz, CDCl<sub>3</sub>)  $\delta$  -77.21; **HRMS** (ESI) calcd. for C<sub>12</sub>H<sub>11</sub>F<sub>3</sub>N<sub>2</sub>O<sub>2</sub>Na ([M+Na]<sup>+</sup>): 295.0665, found: 295.0662.

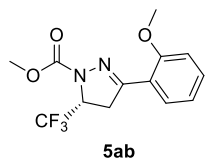

**(R)-methyl 3-(2-methoxyphenyl)-5-(trifluoromethyl)-4,5-dihydro-1H-pyrazole-1-carboxylate (5ab):** White solid; 65% yield, 97% ee; m.p.: 94.7 – 95.5 °C;  $[\alpha]_D^{19} = 97.9$  (c 1.0, CHCl<sub>3</sub>); **HPLC** CHIRALPAK IF, n-Hexane/2-propanol = 90/10, flow rate = 1.0 mL/min,  $\lambda = 254$  nm, retention time: 13.752 min (major), 15.760 min (minor); **<sup>1</sup>H NMR** (600 MHz, CDCl<sub>3</sub>)  $\delta$  7.88 (d, J = 7.6 Hz, 1H), 7.50 – 7.33 (m, 1H), 6.98 (t, J = 7.5 Hz, 1H), 6.93 (d, J = 8.4 Hz, 1H), 5.11 – 4.90 (m, 1H), 3.91 (s, 3H), 3.87 (s, 3H), 3.73 (dd, J = 18.8, 11.7 Hz, 1H), 3.45 (dd, J = 18.9, 3.5 Hz, 1H); **<sup>13</sup>C{<sup>1</sup>H} NMR** (150 MHz, CDCl<sub>3</sub>)  $\delta$  158.2, 155.4, 154.0, 132.3, 129.9, 124.5 (q, J = 280.2 Hz), 121.1, 119.5, 111.4, 58.1 (q, J = 32.0 Hz), 55.6, 53.9, 37.5; **<sup>19</sup>F{<sup>1</sup>H} NMR** (565 MHz, CDCl<sub>3</sub>)  $\delta$  -77.48; **HRMS** (ESI) calcd. for C<sub>13</sub>H<sub>13</sub>F<sub>3</sub>N<sub>2</sub>O<sub>3</sub>Na ([M+Na]<sup>+</sup>): 325.0770, found: 325.0774.

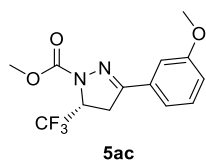

**(R)-methyl 3-(3-methoxyphenyl)-5-(trifluoromethyl)-4,5-dihydro-1H-pyrazole-1-carboxylate (5ac):** White solid; 72% yield, 98% ee; m.p.: 73.0 – 73.8 °C;  $[\alpha]_D^{19} = 92.0$

(c 1.0, CHCl<sub>3</sub>); **HPLC** CHIRALPAK IF, n-Hexane/2-propanol = 90/10, flow rate = 1.0 mL/min,  $\lambda$  = 254 nm, retention time: 12.560 min (major), 17.085 min (minor); **<sup>1</sup>H NMR** (600 MHz, CDCl<sub>3</sub>)  $\delta$  7.38 – 7.30 (m, 2H), 7.30 – 7.22 (m, 1H), 7.05 – 6.95 (m, 1H), 5.09 – 4.94 (m, 1H), 3.92 (s, 3H), 3.85 (s, 3H), 3.56 (dd, J = 17.9, 11.8 Hz, 1H), 3.34 (dd, J = 17.9, 3.7 Hz, 1H); **<sup>13</sup>C{<sup>1</sup>H} NMR** (150 MHz, CDCl<sub>3</sub>)  $\delta$  160.0, 154.9, 153.8, 131.5, 129.9, 124.4 (q, J = 280.8 Hz), 119.7, 117.4, 111.6, 58.1 (q, J = 32.7 Hz), 55.6, 54.0, 34.8; **<sup>19</sup>F{<sup>1</sup>H} NMR** (565 MHz, CDCl<sub>3</sub>)  $\delta$  -77.24; **HRMS** (ESI) calcd. for C<sub>13</sub>H<sub>13</sub>F<sub>3</sub>N<sub>2</sub>O<sub>3</sub>Na ([M+Na]<sup>+</sup>): 325.0770, found: 325.0772.

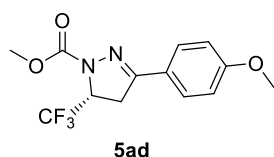

**(R)-methyl 3-(4-methoxyphenyl)-5-(trifluoromethyl)-4,5-dihydro-1H-pyrazole-1-carboxylate (5ad):** White solid; 66% yield, 96% ee; m.p.: 146.7 – 147.3 °C;  $[\alpha]_D^{19}$  = 83.3 (c 1.0, CHCl<sub>3</sub>); **HPLC** CHIRALPAK IF, n-Hexane/2-propanol = 90/10, flow rate = 1.0 mL/min,  $\lambda$  = 254 nm, retention time: 18.097 min (major), 24.338 min (minor); **<sup>1</sup>H NMR** (600 MHz, CDCl<sub>3</sub>)  $\delta$  7.76 – 7.61 (m, 2H), 6.98 – 6.83 (m, 2H), 5.16 – 4.88 (m, 1H), 3.91 (s, 3H), 3.85 (s, 3H), 3.53 (dd, J = 17.8, 11.7 Hz, 1H), 3.33 (dd, J = 17.8, 3.7 Hz, 1H); **<sup>13</sup>C{<sup>1</sup>H} NMR** (150 MHz, CDCl<sub>3</sub>)  $\delta$  161.9, 154.6, 154.0, 128.7, 124.4 (q, J = 280.6 Hz), 122.8, 114.3, 58.0 (q, J = 32.7 Hz), 55.6, 53.9, 34.7; **<sup>19</sup>F{<sup>1</sup>H} NMR** (565 MHz, CDCl<sub>3</sub>)  $\delta$  -77.23; **HRMS** (ESI) calcd. for C<sub>13</sub>H<sub>13</sub>F<sub>3</sub>N<sub>2</sub>O<sub>3</sub>Na ([M+Na]<sup>+</sup>): 325.0770, found: 325.0761.

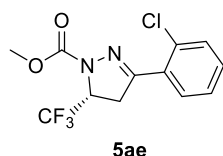

**(R)-methyl 3-(2-chlorophenyl)-5-(trifluoromethyl)-4,5-dihydro-1H-pyrazole-1-carboxylate (5ae):** Colorless oil; 74% yield, 94% ee;  $[\alpha]_D^{19}$  = 110.9 (c 1.0, CHCl<sub>3</sub>); **HPLC** CHIRALPAK IF, n-Hexane/2-propanol = 90/10, flow rate = 1.0 mL/min,  $\lambda$  = 254 nm, retention time: 26.735 min (major), 25.118 min (minor); **<sup>1</sup>H NMR** (600 MHz, CDCl<sub>3</sub>)  $\delta$  7.80 – 7.67 (m, 1H), 7.44 – 7.39 (m, 1H), 7.40 – 7.34 (m, 1H), 7.34 – 7.27 (m, 1H), 5.10 – 4.99 (m, 1H), 3.92 (s, 3H), 3.86 (dd, J = 18.5, 11.8 Hz, 1H), 3.46 (dd,



$J = 18.4, 3.5 \text{ Hz, 1H}$ );  $^{13}\text{C}\{^1\text{H}\}$  NMR (150 MHz,  $\text{CDCl}_3$ )  $\delta$  155.2, 153.6, 133.0, 131.6, 131.1, 130.7, 129.9, 127.3, 124.3 (q,  $J = 281.0 \text{ Hz}$ ), 58.5 (q,  $J = 32.8 \text{ Hz}$ ), 54.1, 37.3;  $^{19}\text{F}\{^1\text{H}\}$  NMR (565 MHz,  $\text{CDCl}_3$ )  $\delta$  -77.50; HRMS (ESI) calcd. for  $\text{C}_{12}\text{H}_{10}\text{ClF}_3\text{N}_2\text{O}_2\text{Na}$  ( $[\text{M}+\text{Na}]^+$ ): 329.0275, found: 329.0277.

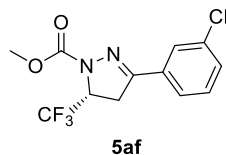

5af

**(R)-methyl 3-(3-chlorophenyl)-5-(trifluoromethyl)-4,5-dihydro-1H-pyrazole-1-carboxylate (5af):** Colorless oil; 60% yield, 95% ee;  $[\alpha]_{\text{D}}^{19} = 101.5$  (c 1.0,  $\text{CHCl}_3$ ); HPLC CHIRALPAK IF, n-Hexane/2-propanol = 90/10, flow rate = 1.0 mL/min,  $\lambda = 254 \text{ nm}$ , retention time: 8.130 min (major), 9.552 min (minor);  $^1\text{H}$  NMR (600 MHz,  $\text{CDCl}_3$ )  $\delta$  7.78 – 7.73 (m, 1H), 7.65 – 7.57 (m, 1H), 7.46 – 7.39 (m, 1H), 7.39 – 7.33 (m, 1H), 5.13 – 4.98 (m, 1H), 3.92 (s, 3H), 3.54 (dd,  $J = 17.9, 11.8 \text{ Hz}$ , 1H), 3.33 (dd,  $J = 17.9, 3.8 \text{ Hz}$ , 1H);  $^{13}\text{C}\{^1\text{H}\}$  NMR (150 MHz,  $\text{CDCl}_3$ )  $\delta$  153.7, 153.7, 135.1, 131.9, 131.0, 130.2, 127.0, 125.1, 124.3 (q,  $J = 281.0 \text{ Hz}$ ), 58.3 (q,  $J = 32.8 \text{ Hz}$ ), 54.1, 34.6;  $^{19}\text{F}\{^1\text{H}\}$  NMR (565 MHz,  $\text{CDCl}_3$ )  $\delta$  -77.23; HRMS (ESI) calcd. for  $\text{C}_{12}\text{H}_{10}\text{ClF}_3\text{N}_2\text{O}_2\text{Na}$  ( $[\text{M}+\text{Na}]^+$ ): 329.0275, found: 329.0275.

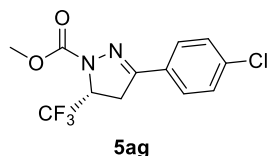

5ag

**(R)-methyl 3-(4-chlorophenyl)-5-(trifluoromethyl)-4,5-dihydro-1H-pyrazole-1-carboxylate (5ag):** Colorless oil; 70% yield, 97% ee;  $[\alpha]_{\text{D}}^{19} = 105.3$  (c 1.0,  $\text{CHCl}_3$ ); HPLC CHIRALPAK IF, n-Hexane/2-propanol = 90/10, flow rate = 1.0 mL/min,  $\lambda = 254 \text{ nm}$ , retention time: 8.448 min (major), 9.908 min (minor);  $^1\text{H}$  NMR (600 MHz,  $\text{CDCl}_3$ )  $\delta$  7.74 – 7.63 (m, 2H), 7.48 – 7.35 (m, 2H), 5.11 – 4.98 (m, 1H), 3.92 (s, 3H), 3.54 (dd,  $J = 17.9, 11.8 \text{ Hz}$ , 1H), 3.33 (dd,  $J = 17.9, 3.8 \text{ Hz}$ , 1H);  $^{13}\text{C}\{^1\text{H}\}$  NMR (150 MHz,  $\text{CDCl}_3$ )  $\delta$  153.8, 153.7, 137.2, 129.3, 128.7, 128.3, 124.3 (q,  $J = 280.3 \text{ Hz}$ ), 58.3 (q,  $J = 33.0 \text{ Hz}$ ), 54.1, 34.6;  $^{19}\text{F}\{^1\text{H}\}$  NMR (565 MHz,  $\text{CDCl}_3$ )  $\delta$  -77.23; HRMS (ESI) calcd. for  $\text{C}_{12}\text{H}_{10}\text{ClF}_3\text{N}_2\text{O}_2\text{Na}$  ( $[\text{M}+\text{Na}]^+$ ): 329.0275, found: 329.0274.

# 10. Copies of NMR Spectra

<sup>1</sup>H NMR of 3aa (600 MHz, CDCl<sub>3</sub>)

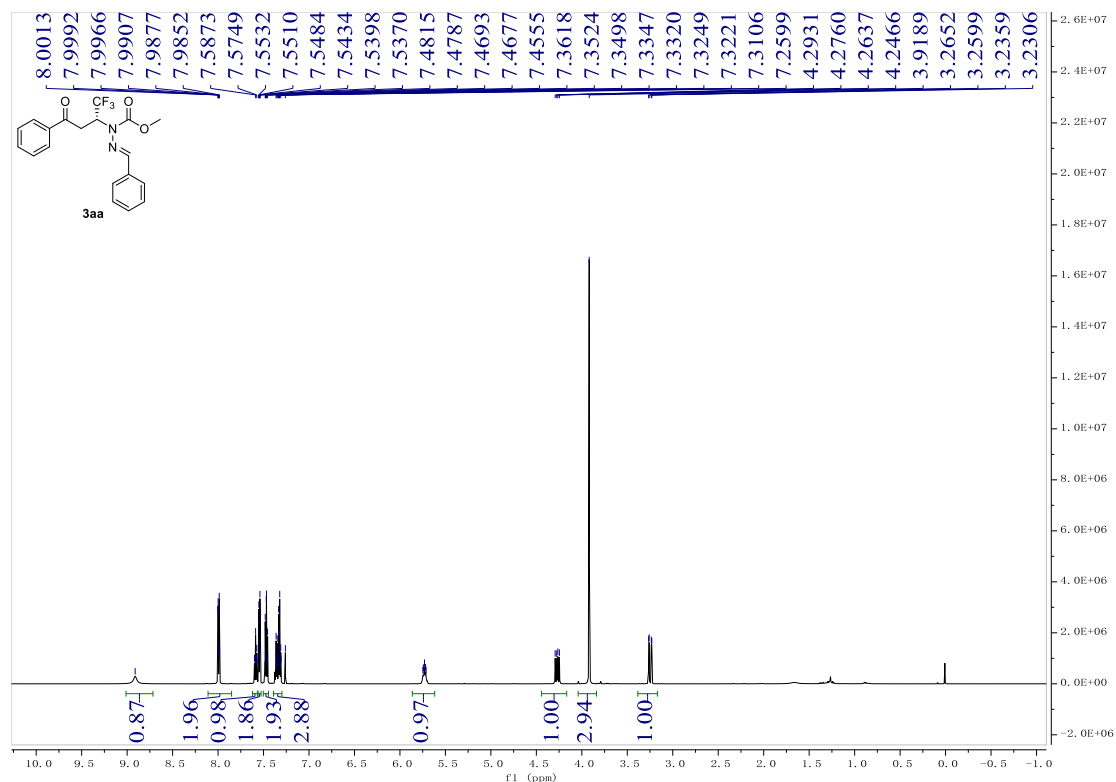

<sup>13</sup>C{<sup>1</sup>H} NMR of 3aa (150 MHz, CDCl<sub>3</sub>)

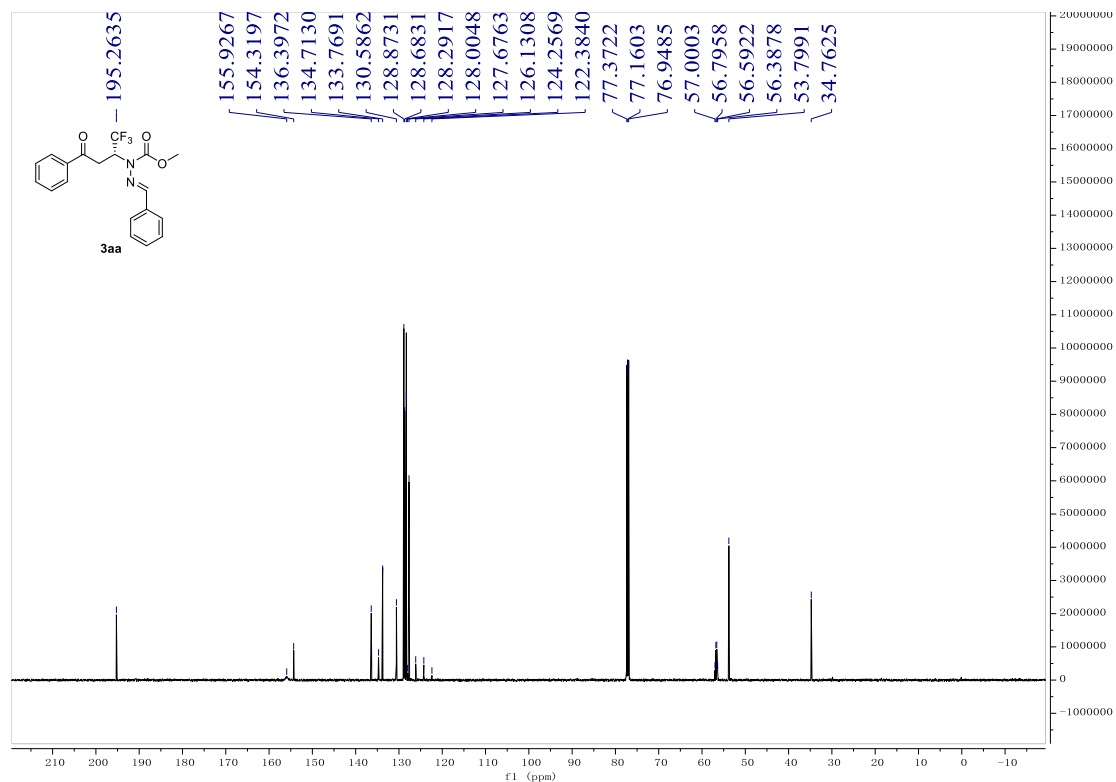

**$^{19}\text{F}\{^1\text{H}\}$  NMR of 3aa (565 MHz,  $\text{CDCl}_3$ )**

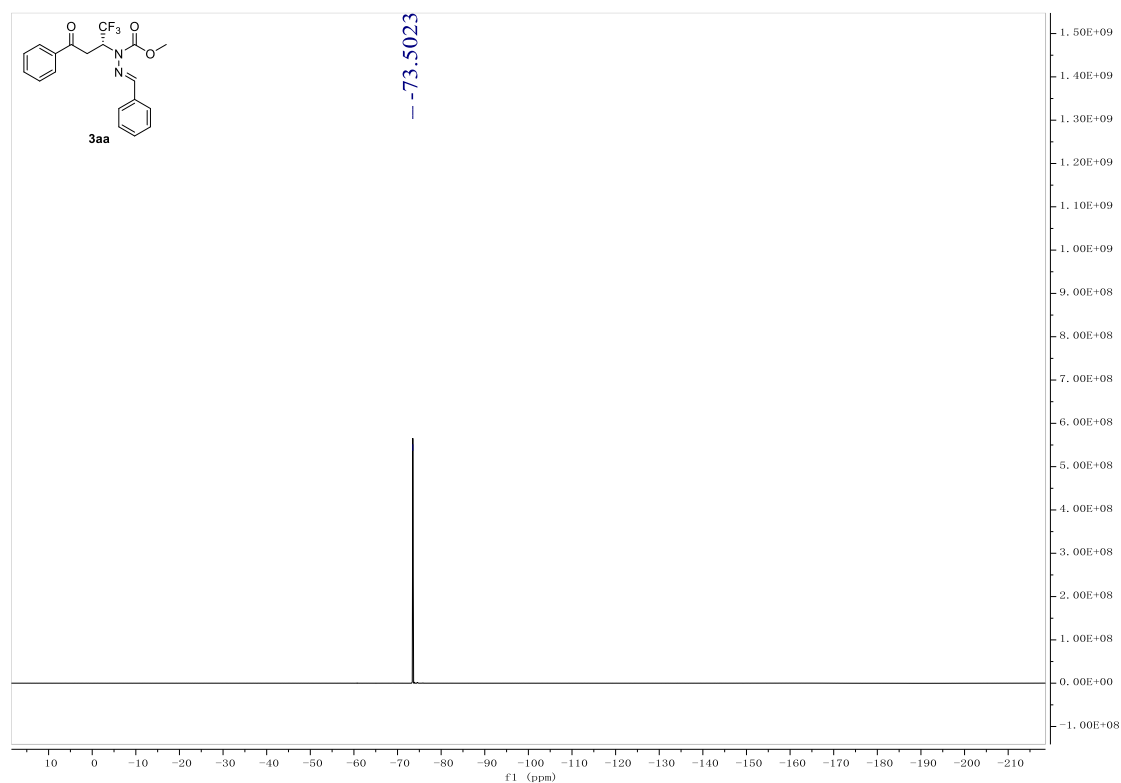

**$^1\text{H}$  NMR of 3ab (400 MHz,  $\text{CDCl}_3$ )**

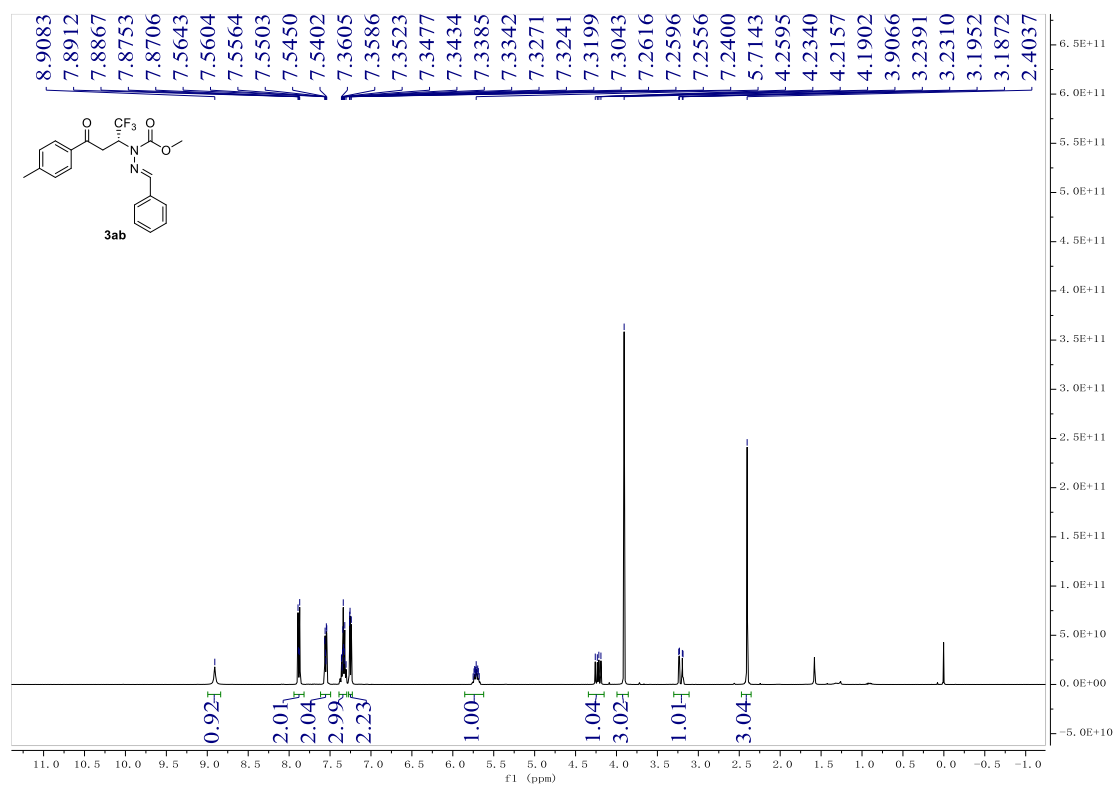

**$^{13}\text{C}\{^1\text{H}\}$  NMR of 3ab (100 MHz,  $\text{CDCl}_3$ )**

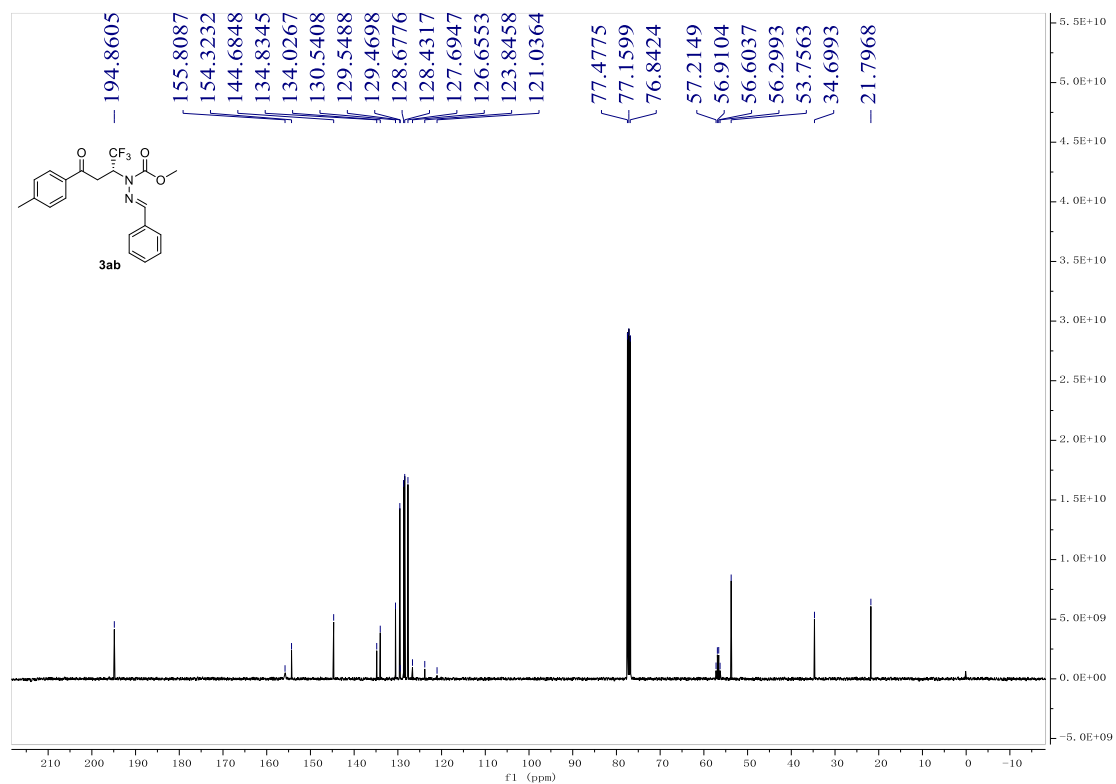

**<sup>19</sup>F{<sup>1</sup>H} NMR of 3ab (376 MHz, CDCl<sub>3</sub>)**

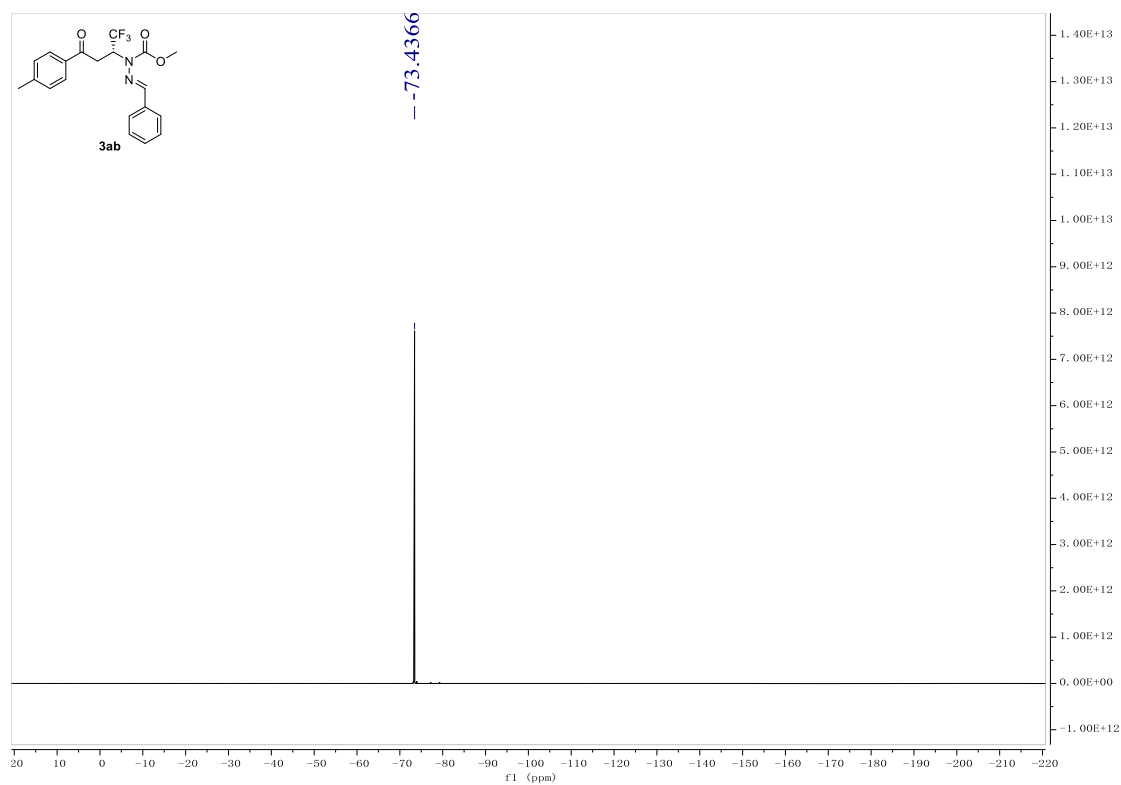

**<sup>1</sup>H NMR of 3ac (400 MHz, CDCl<sub>3</sub>)**

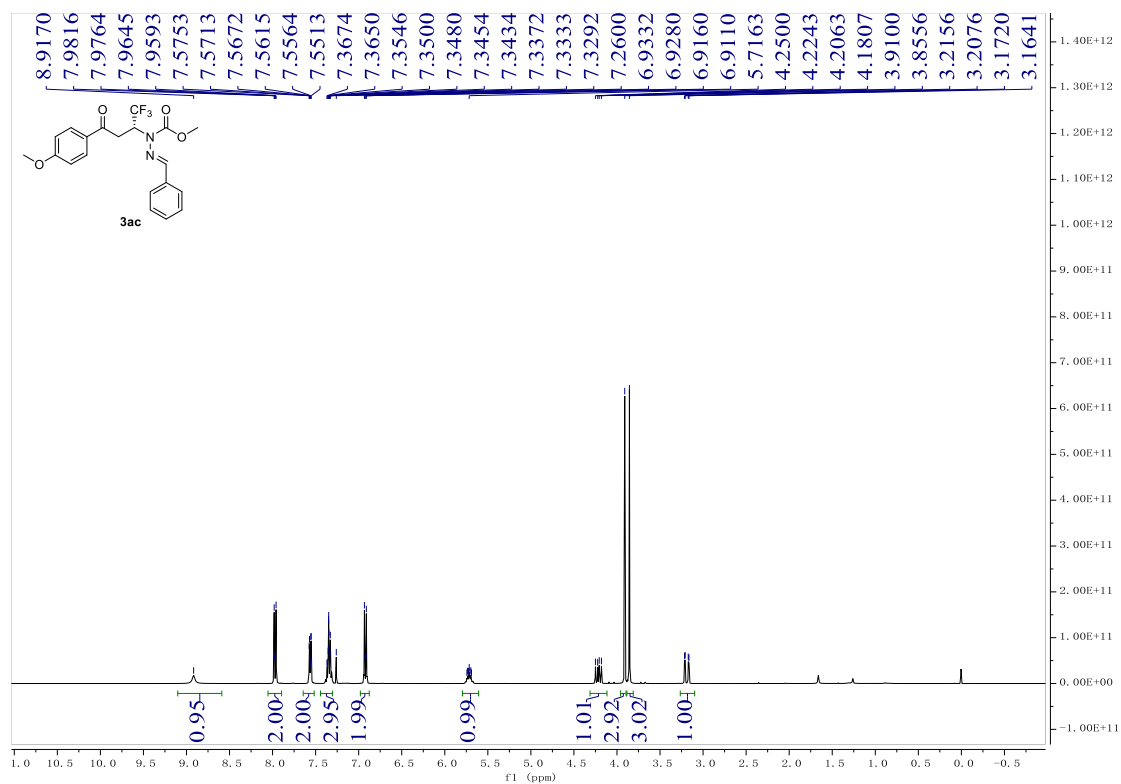

**<sup>13</sup>C{<sup>1</sup>H} NMR of 3ac (100 MHz, CDCl<sub>3</sub>)**

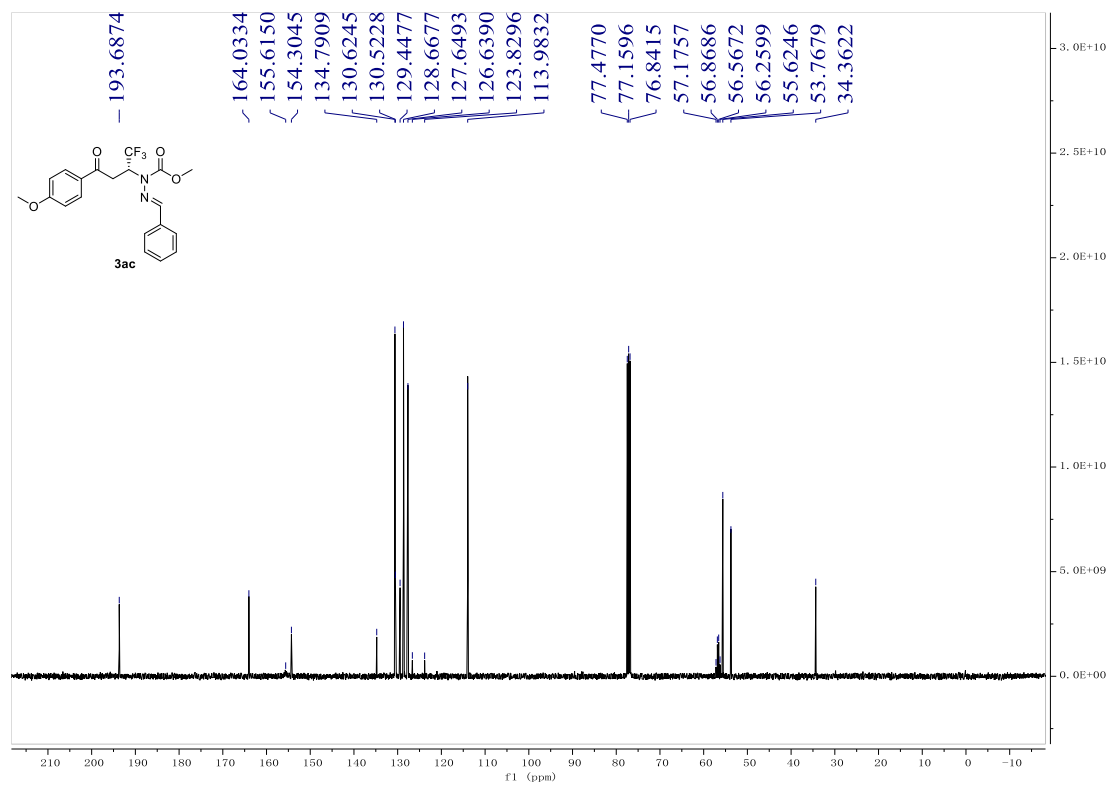

**<sup>19</sup>F{<sup>1</sup>H} NMR of 3ac (376 MHz, CDCl<sub>3</sub>)**

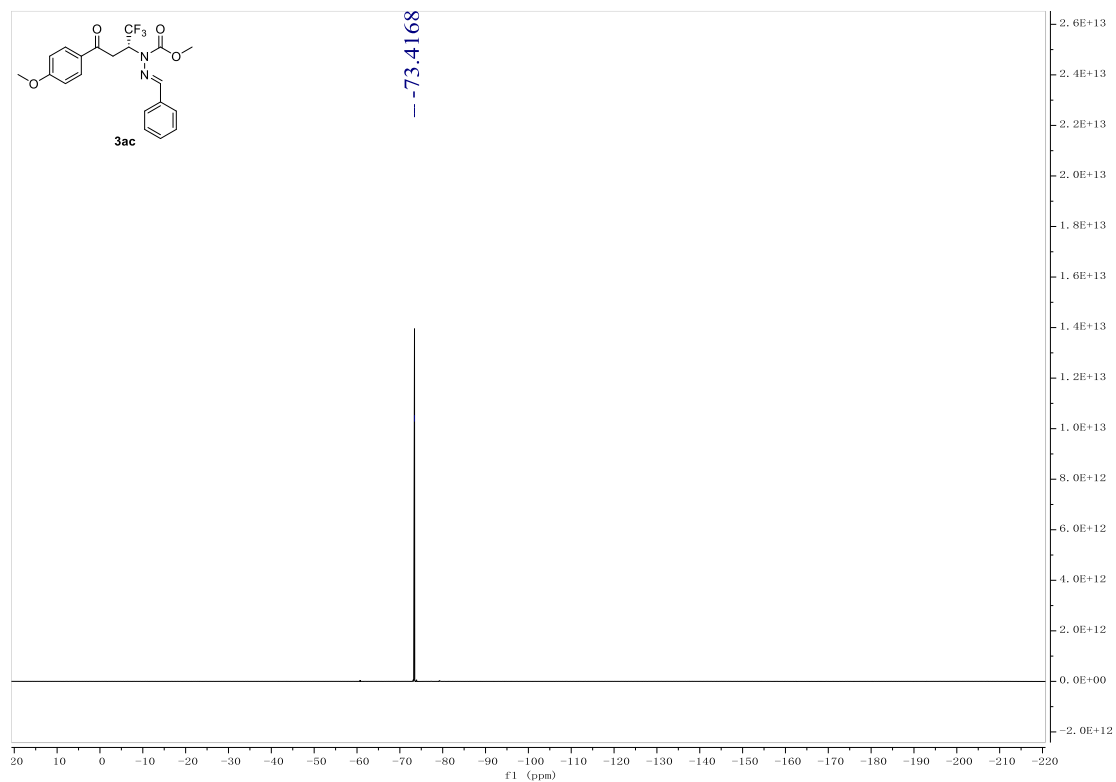

**<sup>1</sup>H NMR of 3ad (400 MHz, CDCl<sub>3</sub>)**

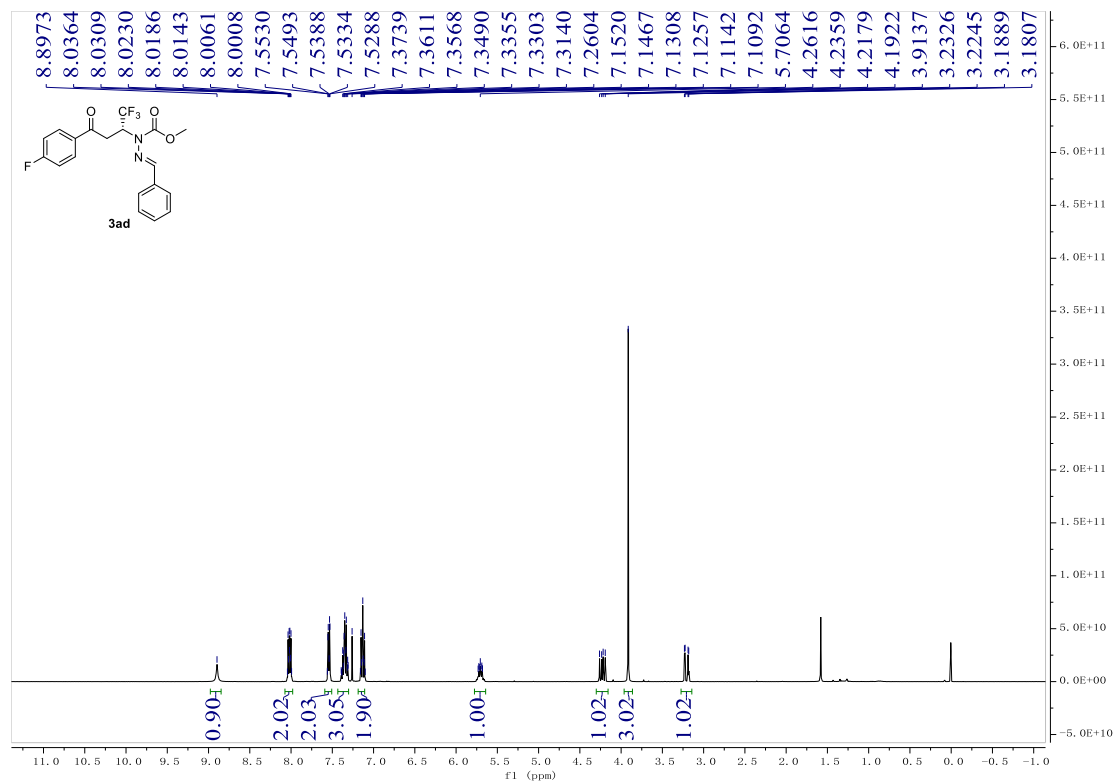

**<sup>13</sup>C{<sup>1</sup>H} NMR of 3ad (100 MHz, CDCl<sub>3</sub>)**

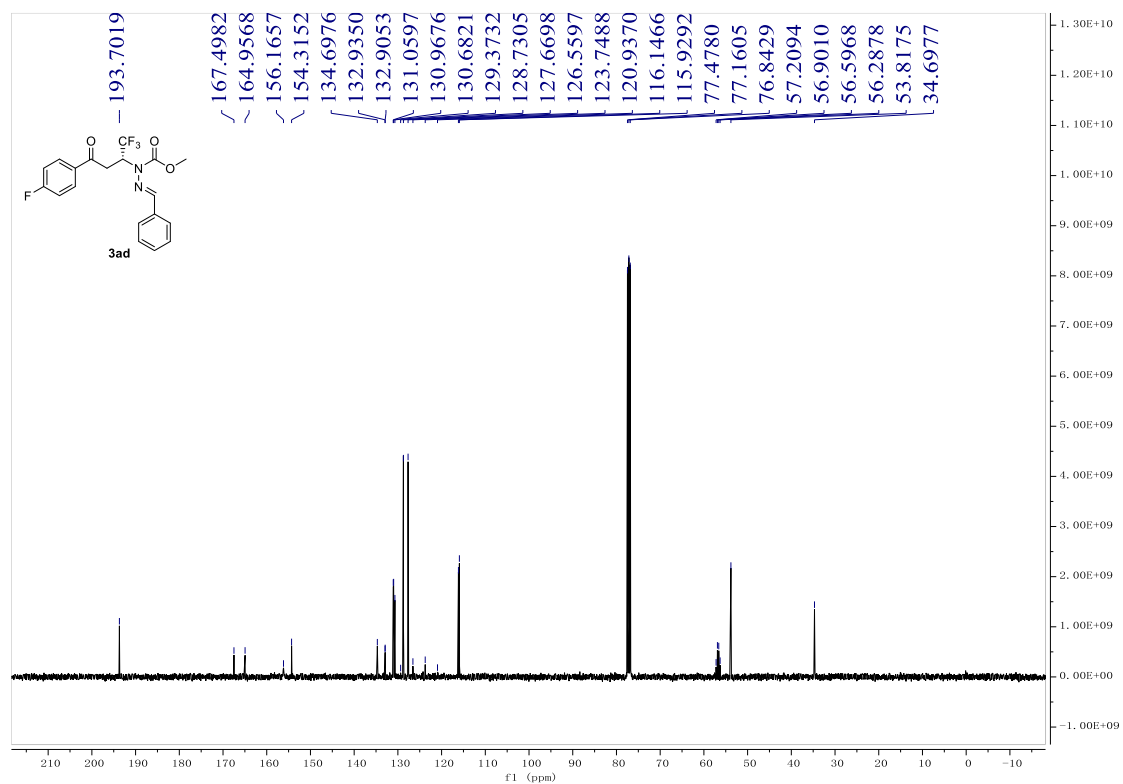

**<sup>19</sup>F{<sup>1</sup>H} NMR of 3ad (376 MHz, CDCl<sub>3</sub>)**

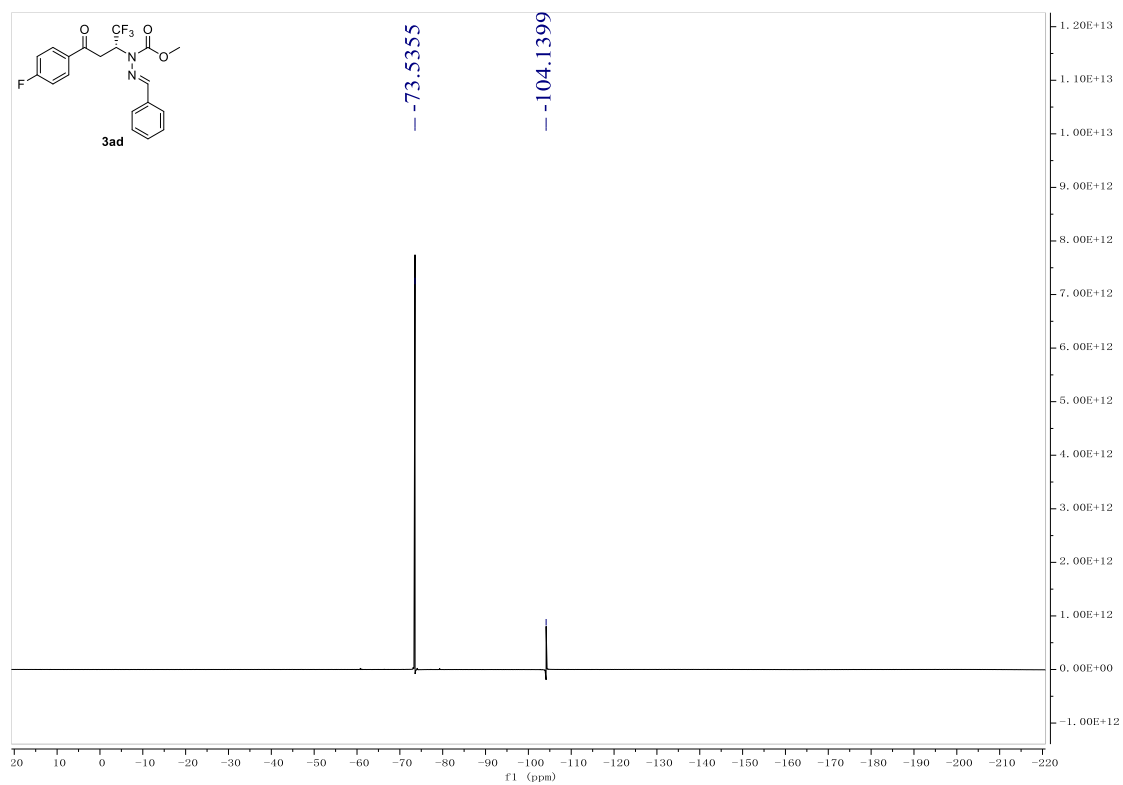

**<sup>1</sup>H NMR of 3ae (400 MHz, CDCl<sub>3</sub>)**

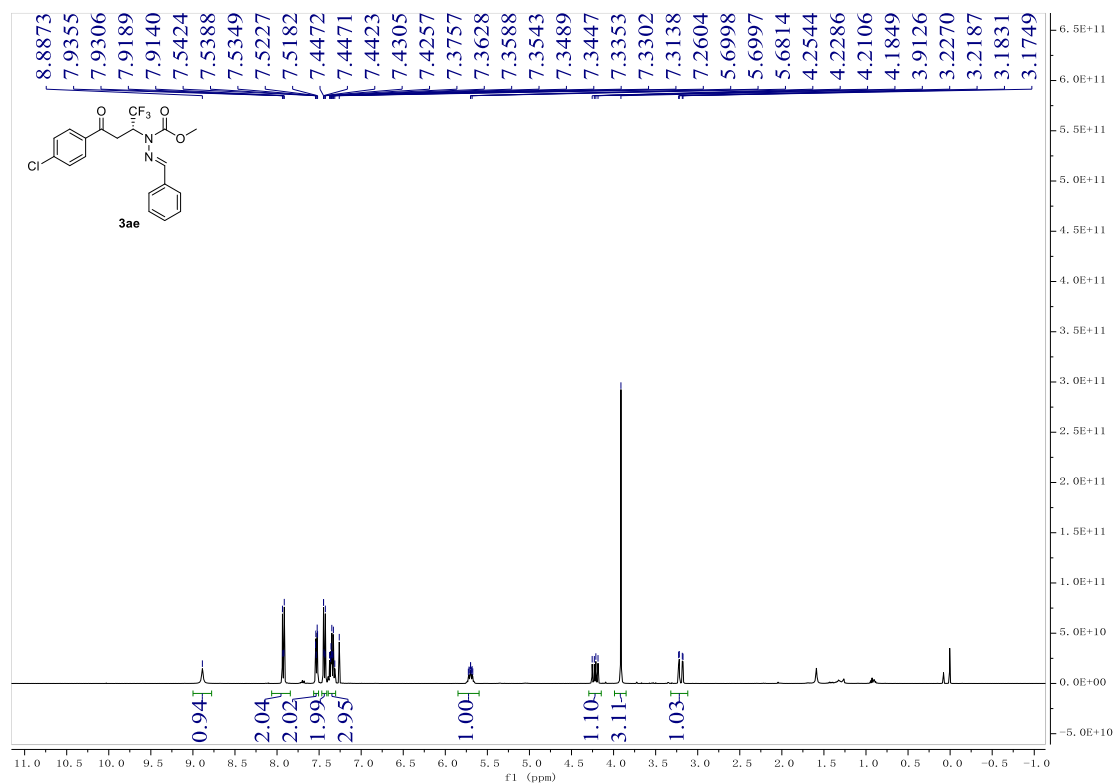

**<sup>13</sup>C{<sup>1</sup>H} NMR of 3ae (100 MHz, CDCl<sub>3</sub>)**

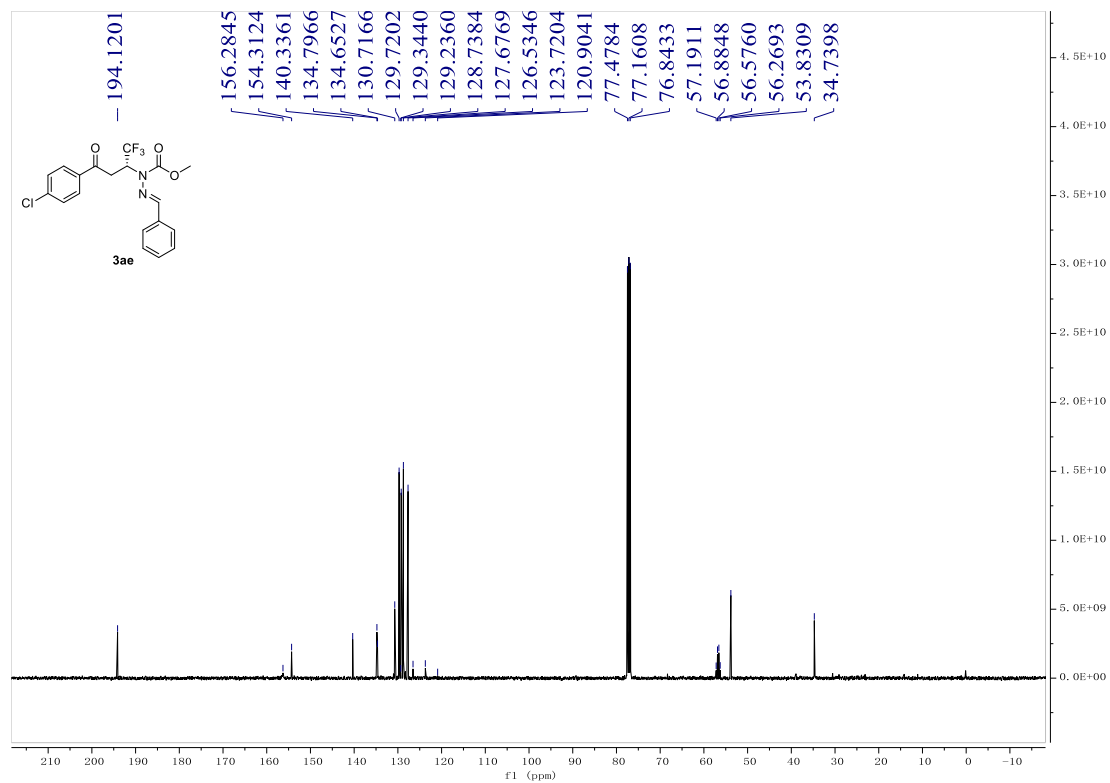

**<sup>19</sup>F{<sup>1</sup>H} NMR of 3ae (376 MHz, CDCl<sub>3</sub>)**



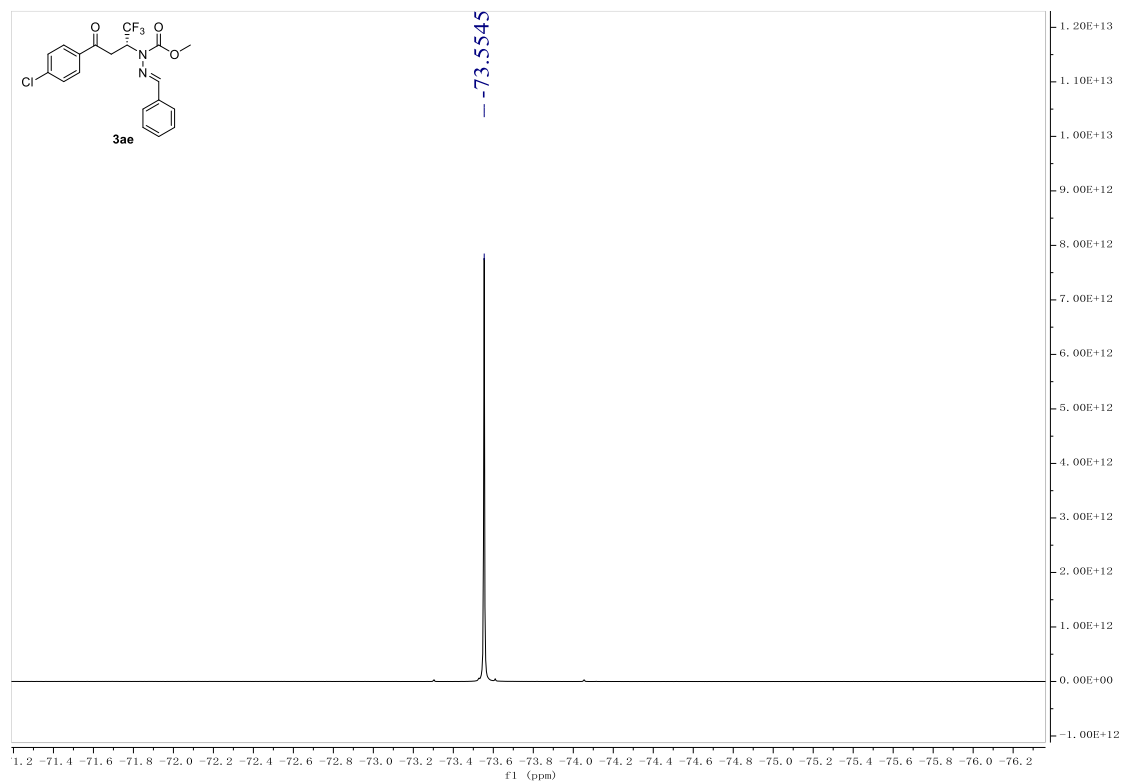

**$^1\text{H NMR}$  of 3af (400 MHz,  $\text{CDCl}_3$ )**

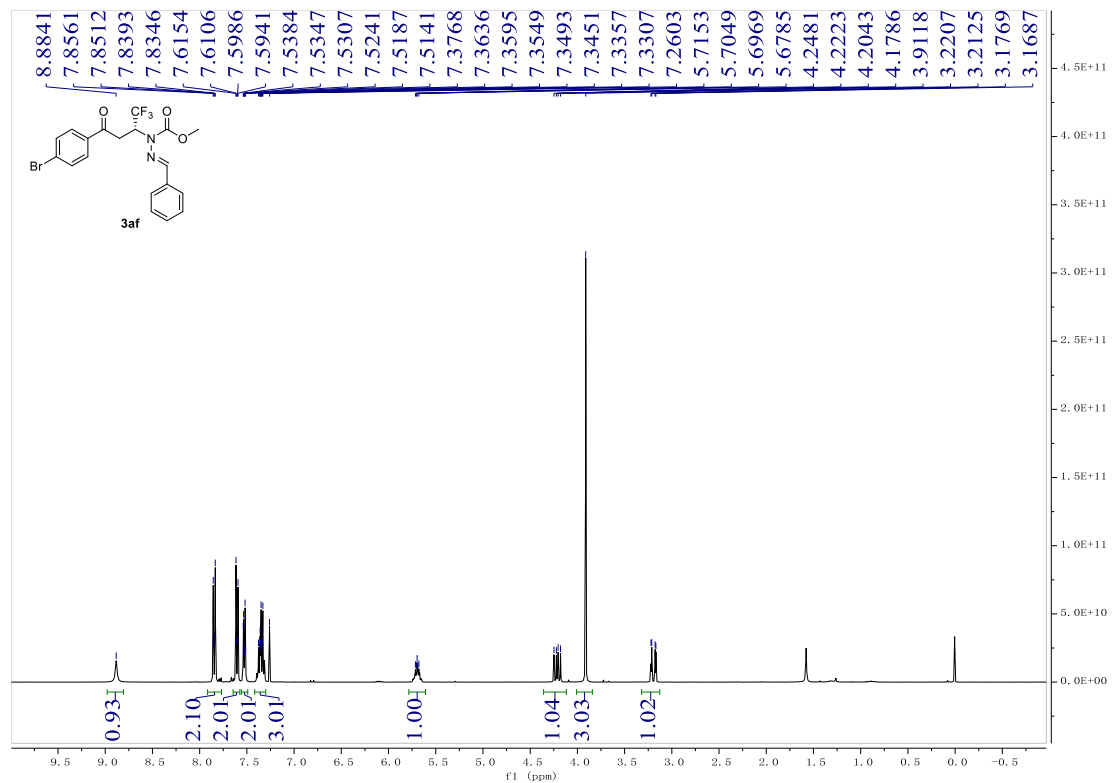

**$^{13}\text{C}\{^1\text{H}\}$  NMR of 3af (100 MHz,  $\text{CDCl}_3$ )**

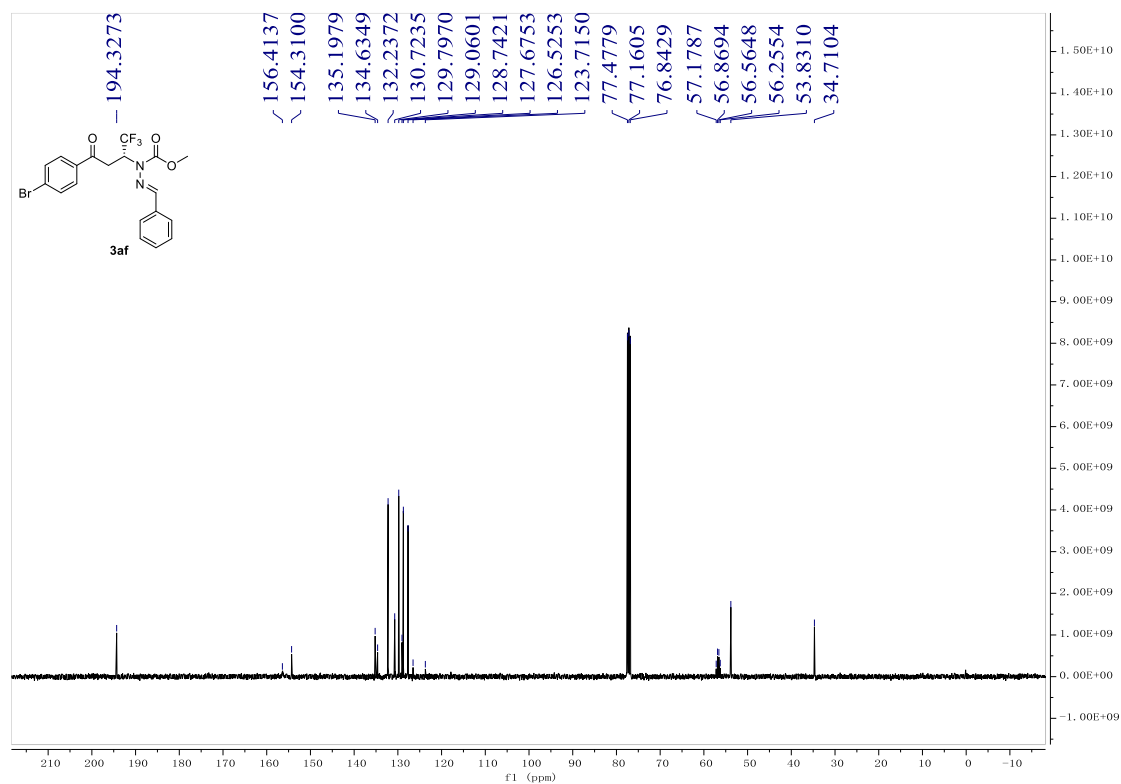

**<sup>19</sup>F{<sup>1</sup>H} NMR of 3af (376 MHz, CDCl<sub>3</sub>)**

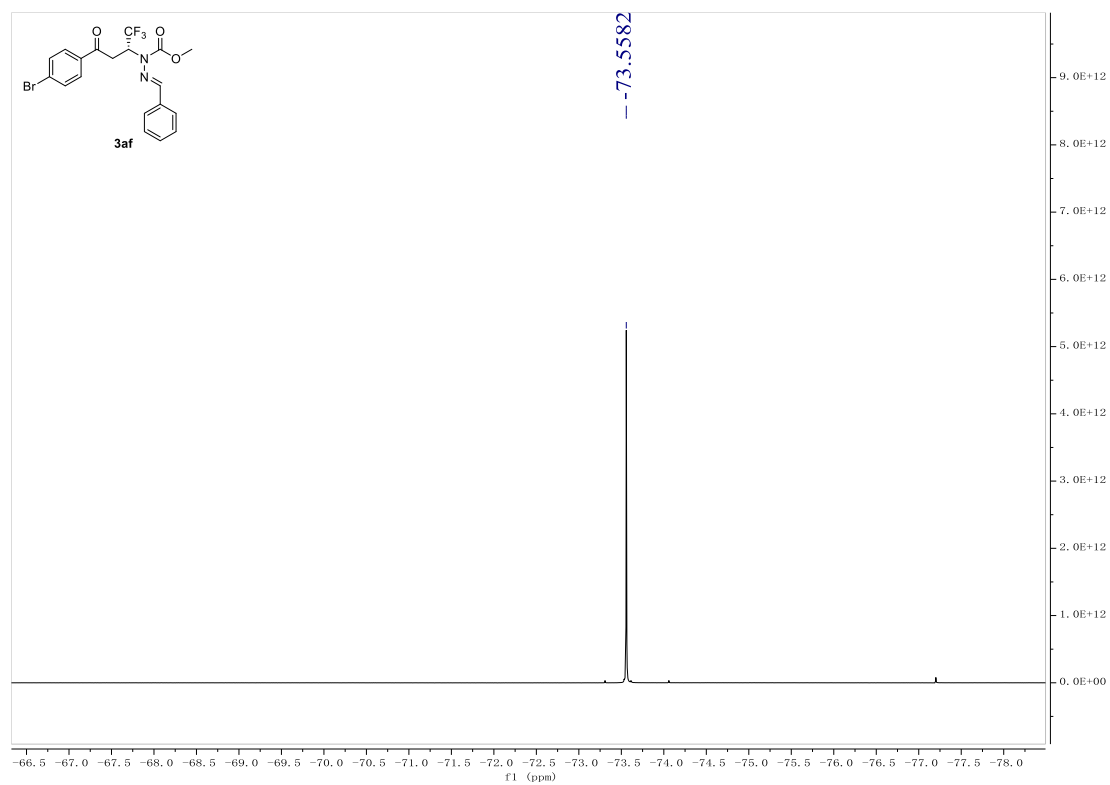

**<sup>1</sup>H NMR of 3ag (400 MHz, CDCl<sub>3</sub>)**

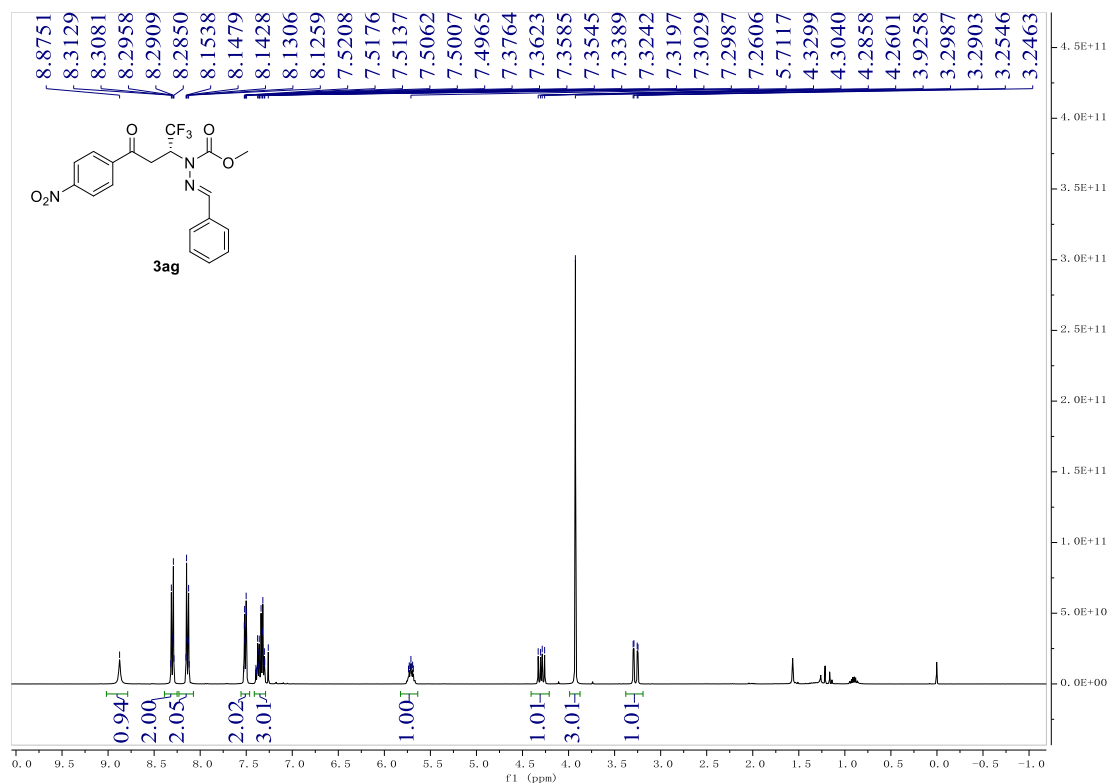

**<sup>13</sup>C{<sup>1</sup>H} NMR of 3ag (100 MHz, CDCl<sub>3</sub>)**

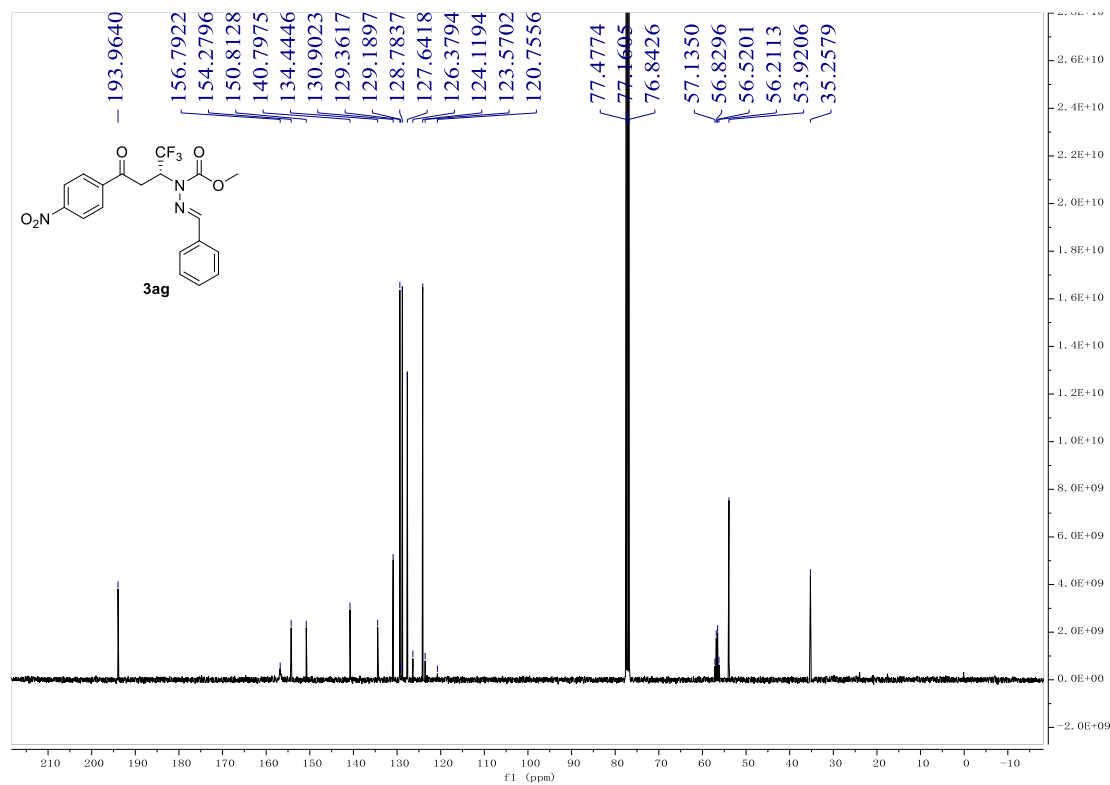

**<sup>19</sup>F{<sup>1</sup>H} NMR of 3ag (376 MHz, CDCl<sub>3</sub>)**

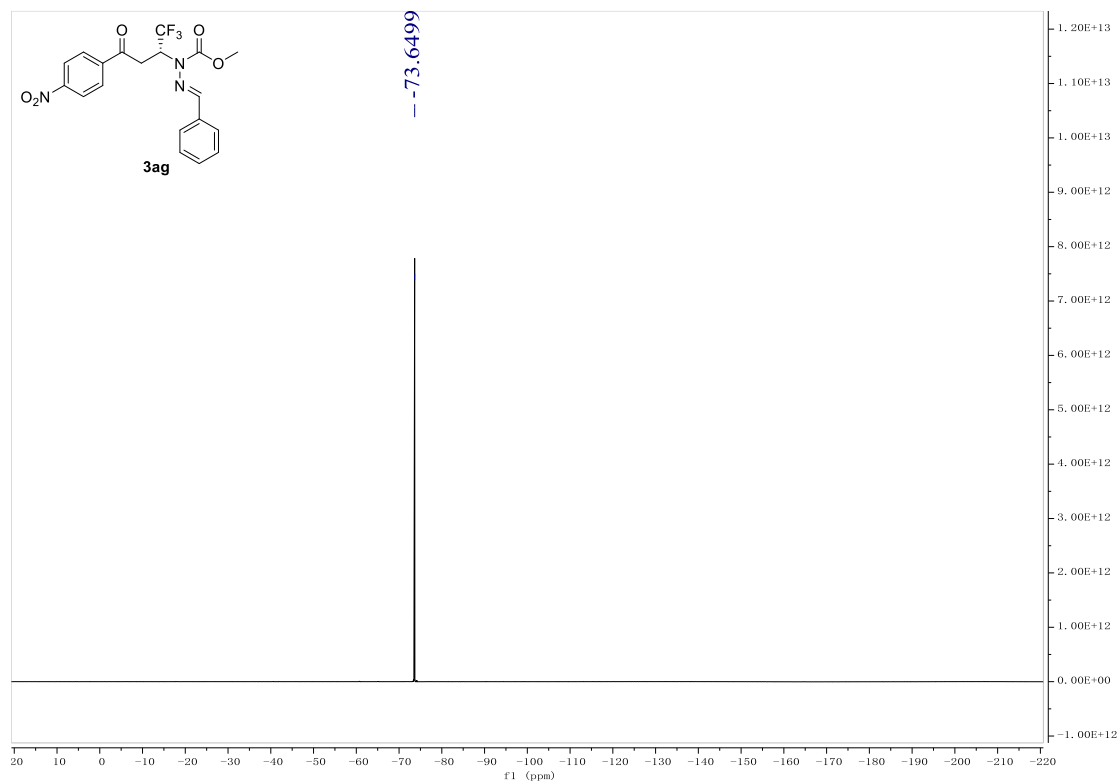

**$^1\text{H}$  NMR of 3ah (400 MHz,  $\text{CDCl}_3$ )**

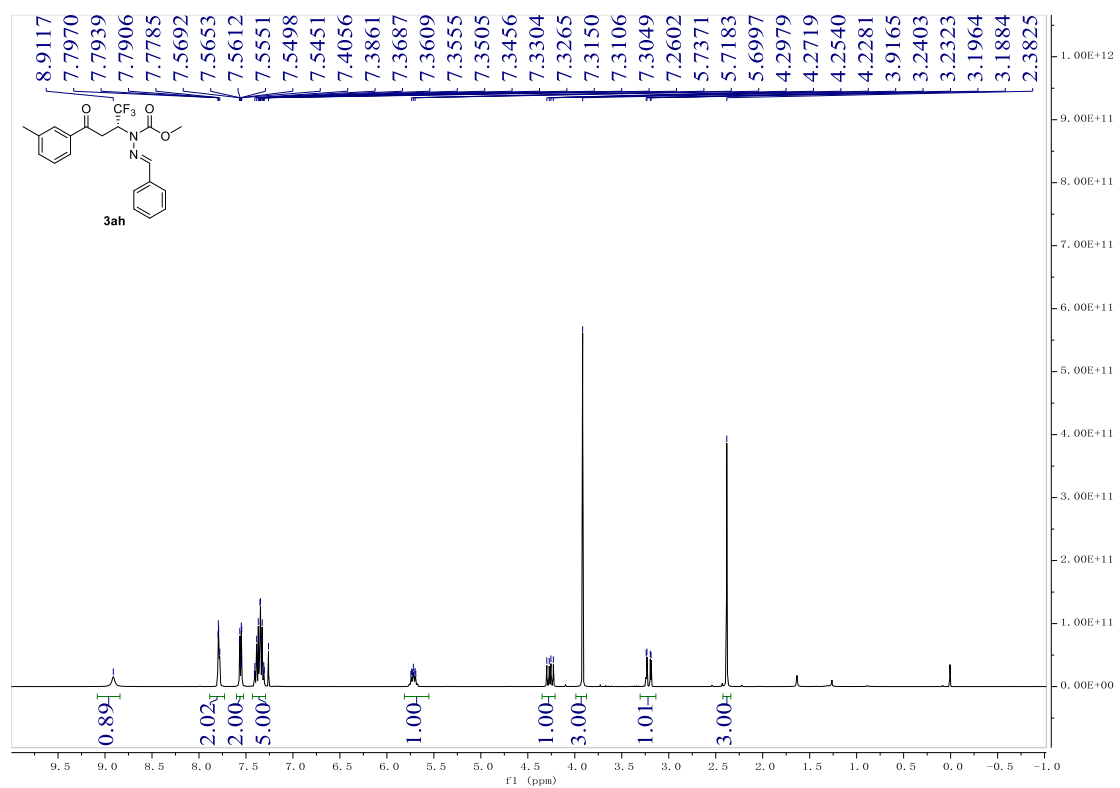

**$^{13}\text{C}\{^1\text{H}\}$  NMR of 3ah (100 MHz,  $\text{CDCl}_3$ )**

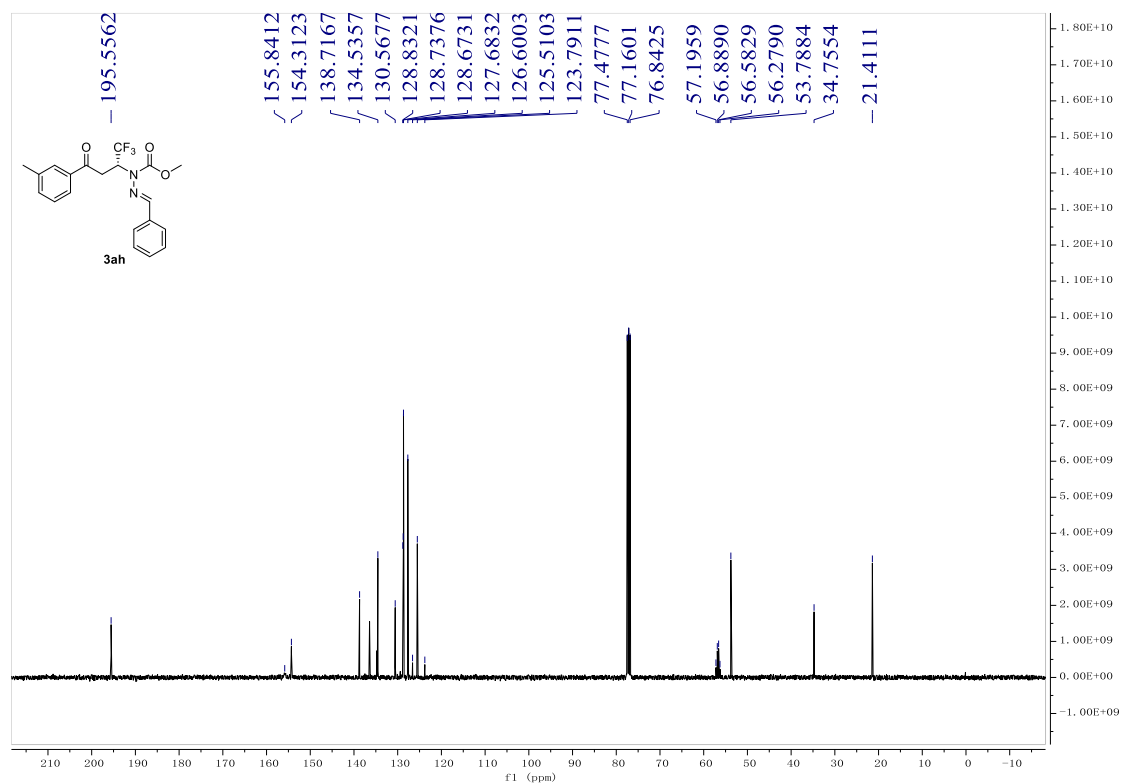

**<sup>19</sup>F{<sup>1</sup>H} NMR of 3ah (376 MHz, CDCl<sub>3</sub>)**

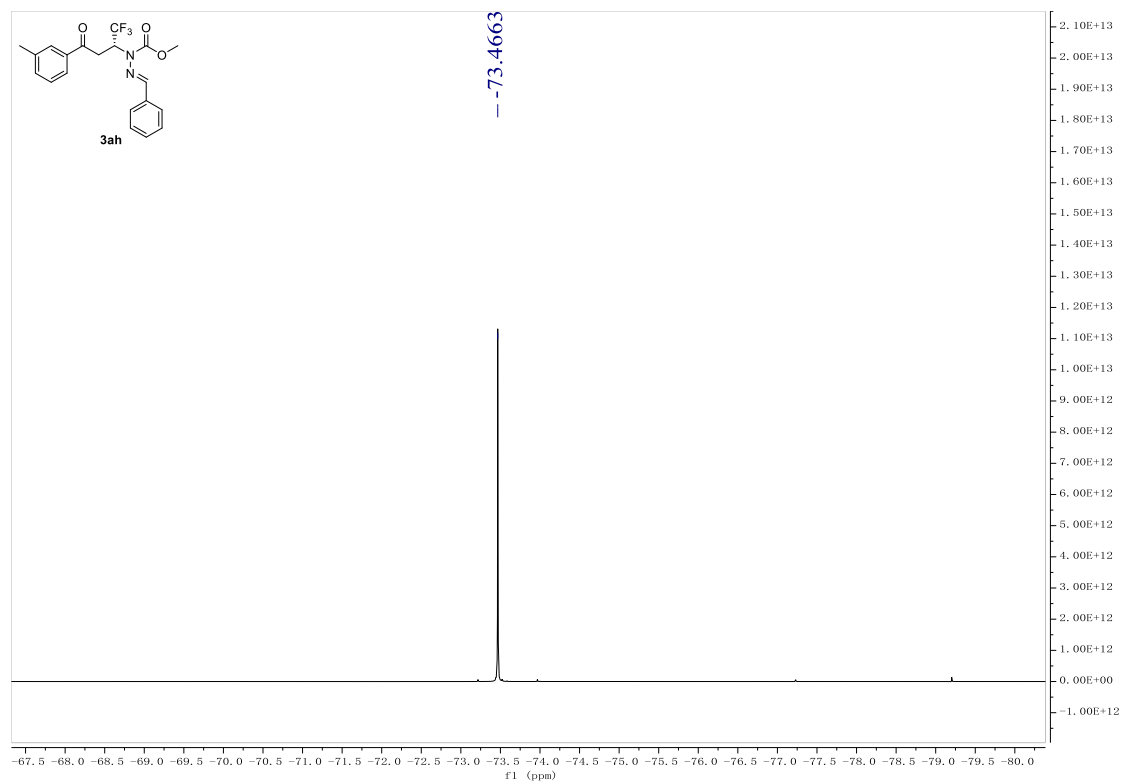

**<sup>1</sup>H NMR of 3ai (400 MHz, CDCl<sub>3</sub>)**

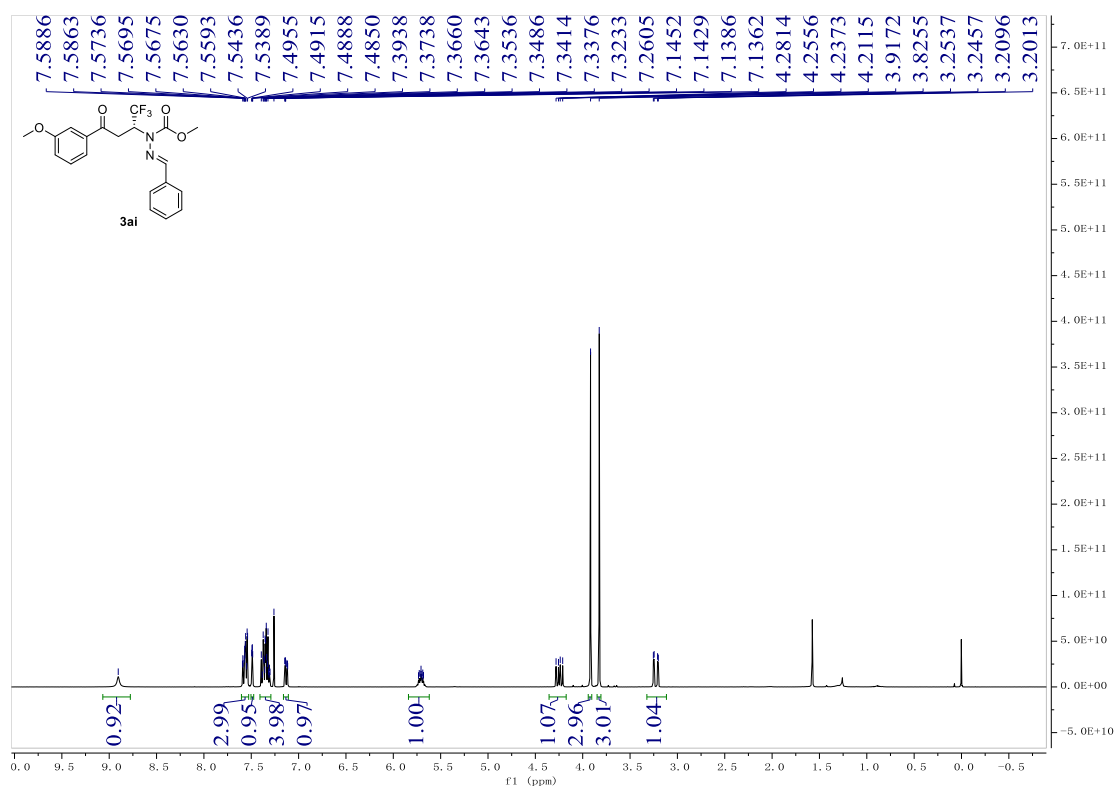

**<sup>13</sup>C{<sup>1</sup>H} NMR of 3ai (100 MHz, CDCl<sub>3</sub>)**

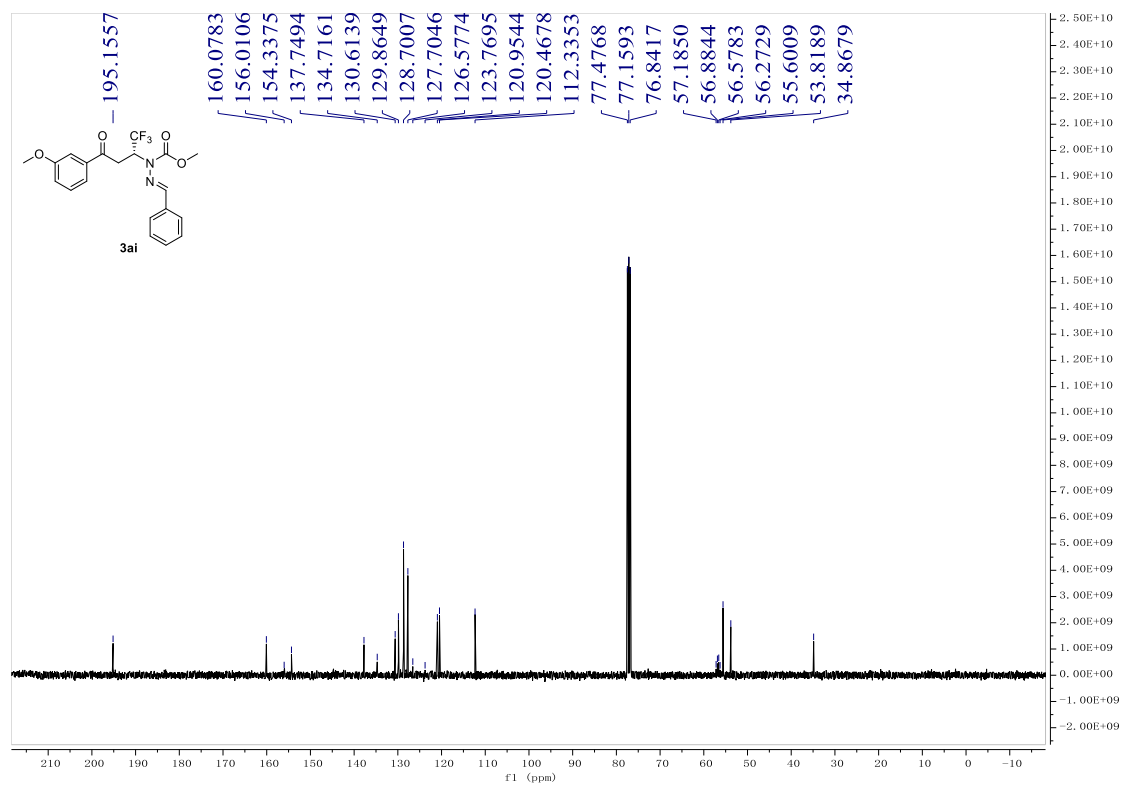

**<sup>19</sup>F{<sup>1</sup>H} NMR of 3ai (376 MHz, CDCl<sub>3</sub>)**

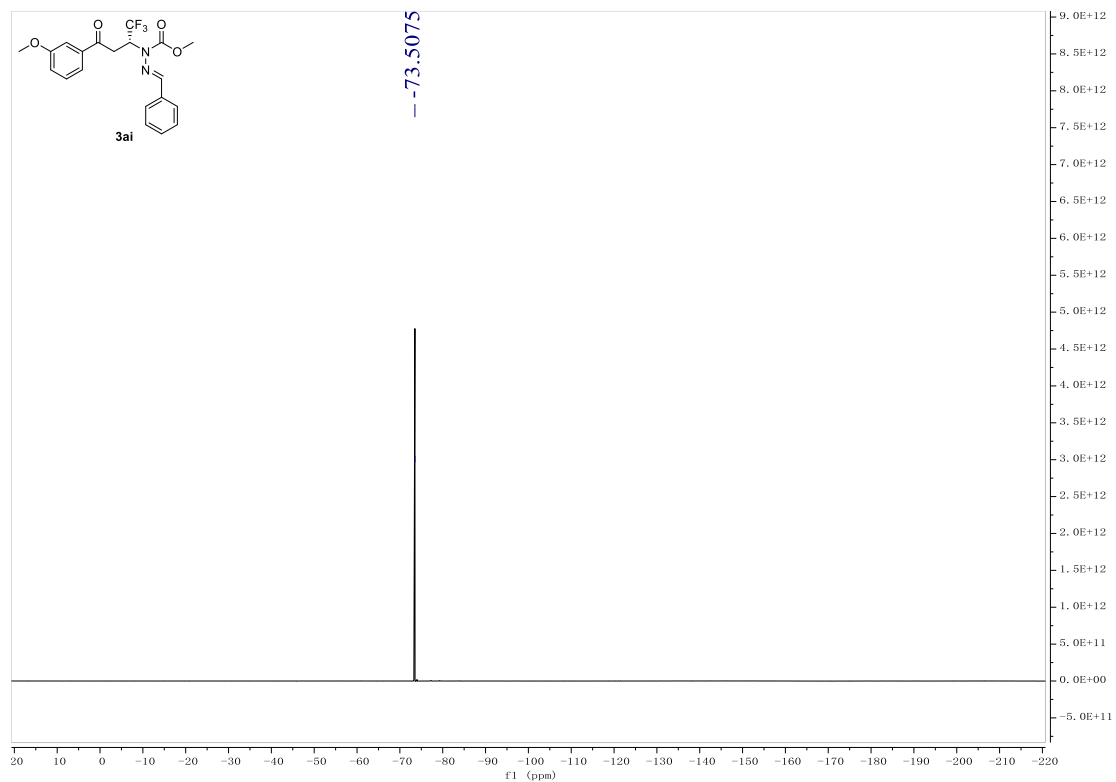

**<sup>1</sup>H NMR of 3aj (400 MHz, CDCl<sub>3</sub>)**

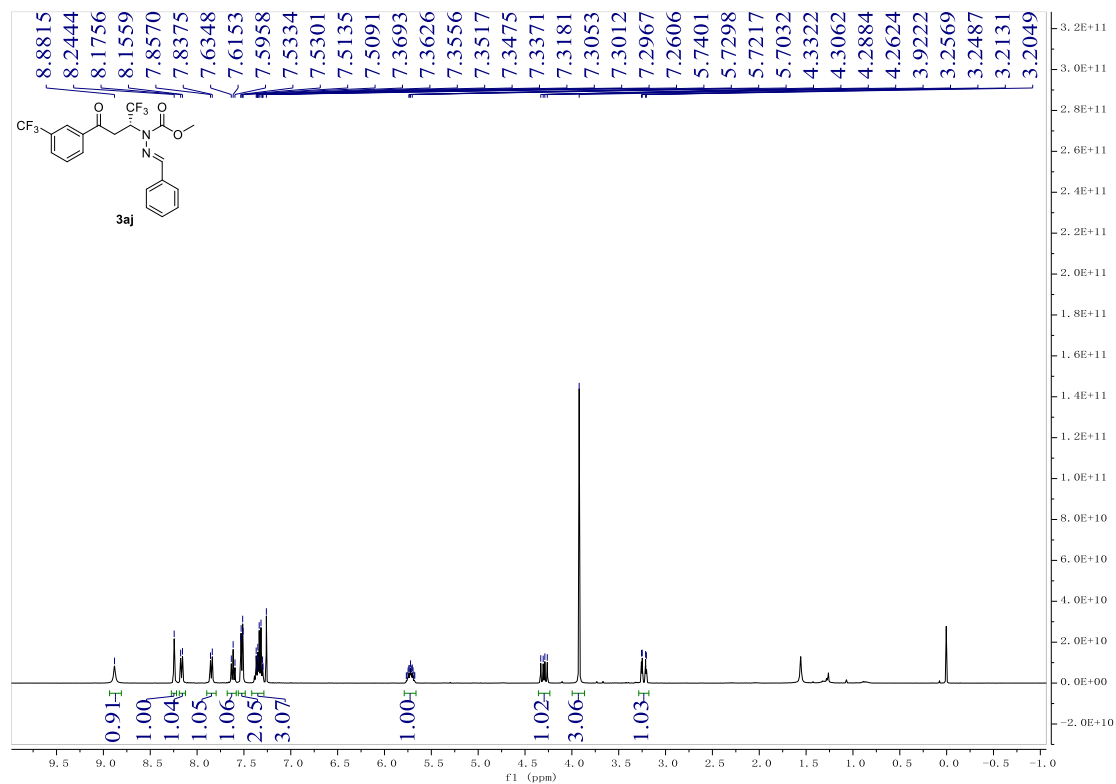

**<sup>13</sup>C{<sup>1</sup>H} NMR of 3aj(100 MHz, CDCl<sub>3</sub>)**

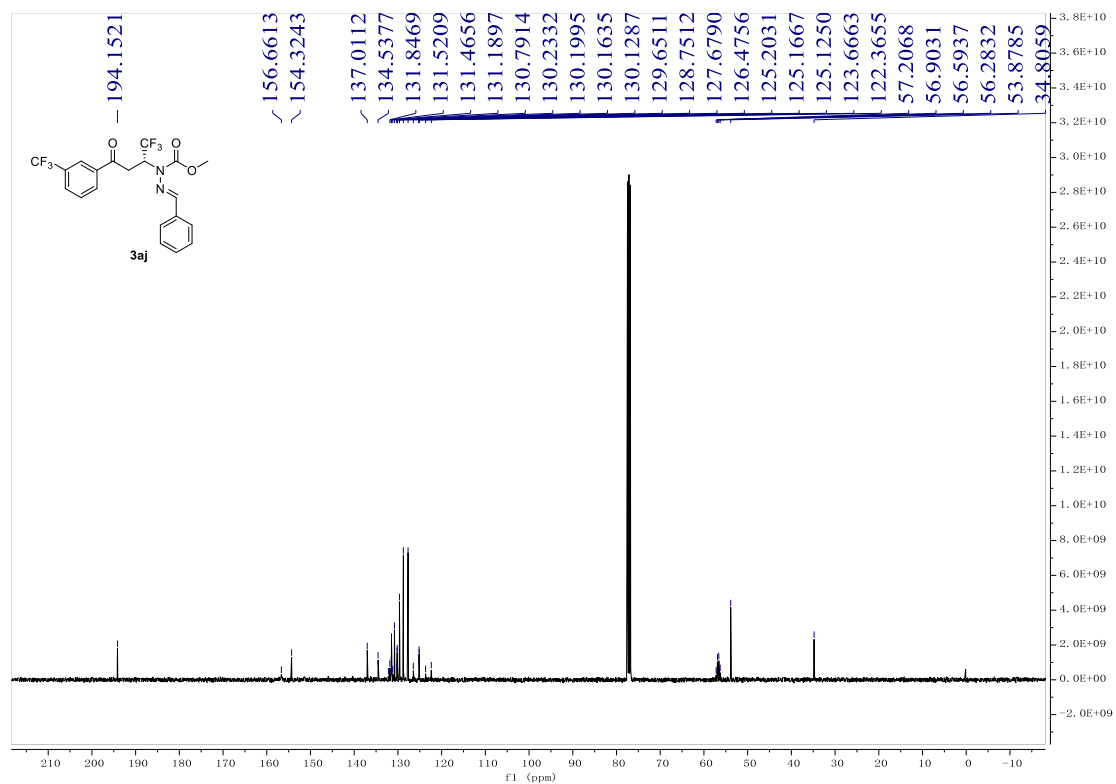

**$^{19}\text{F}\{^1\text{H}\}$  NMR of 3aj (376 MHz,  $\text{CDCl}_3$ )**

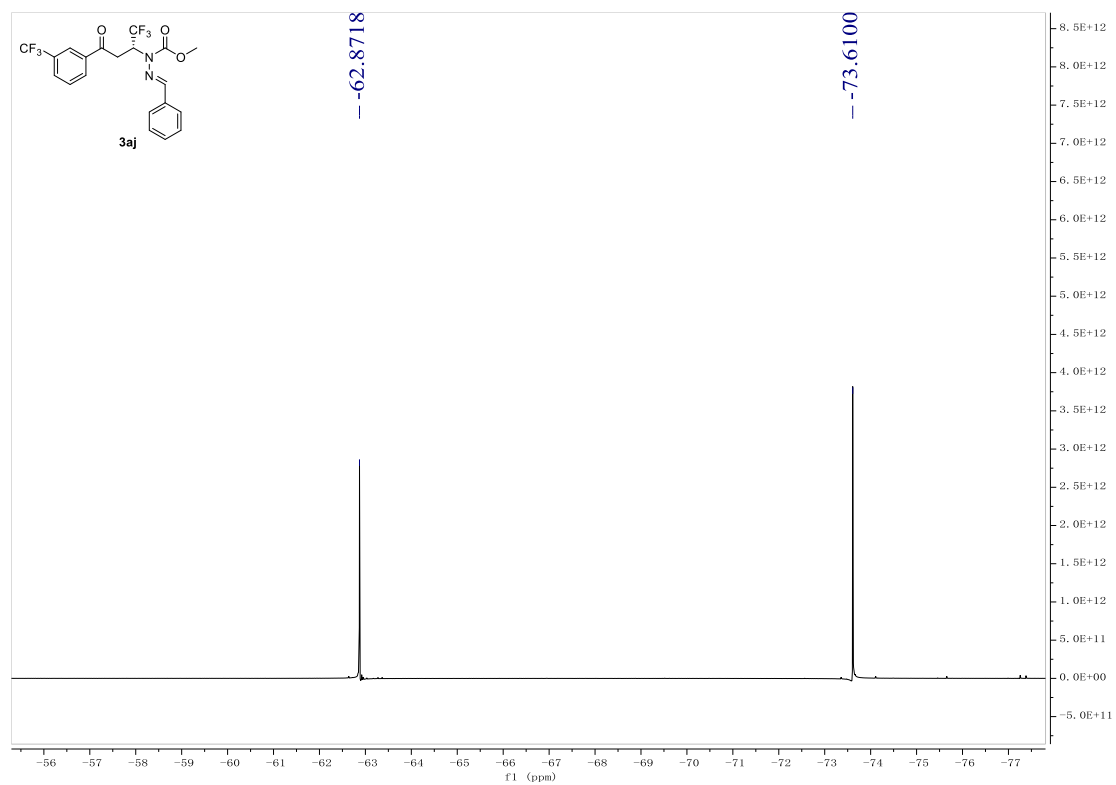

**$^1\text{H}$  NMR of 3ak (400 MHz,  $\text{CDCl}_3$ )**



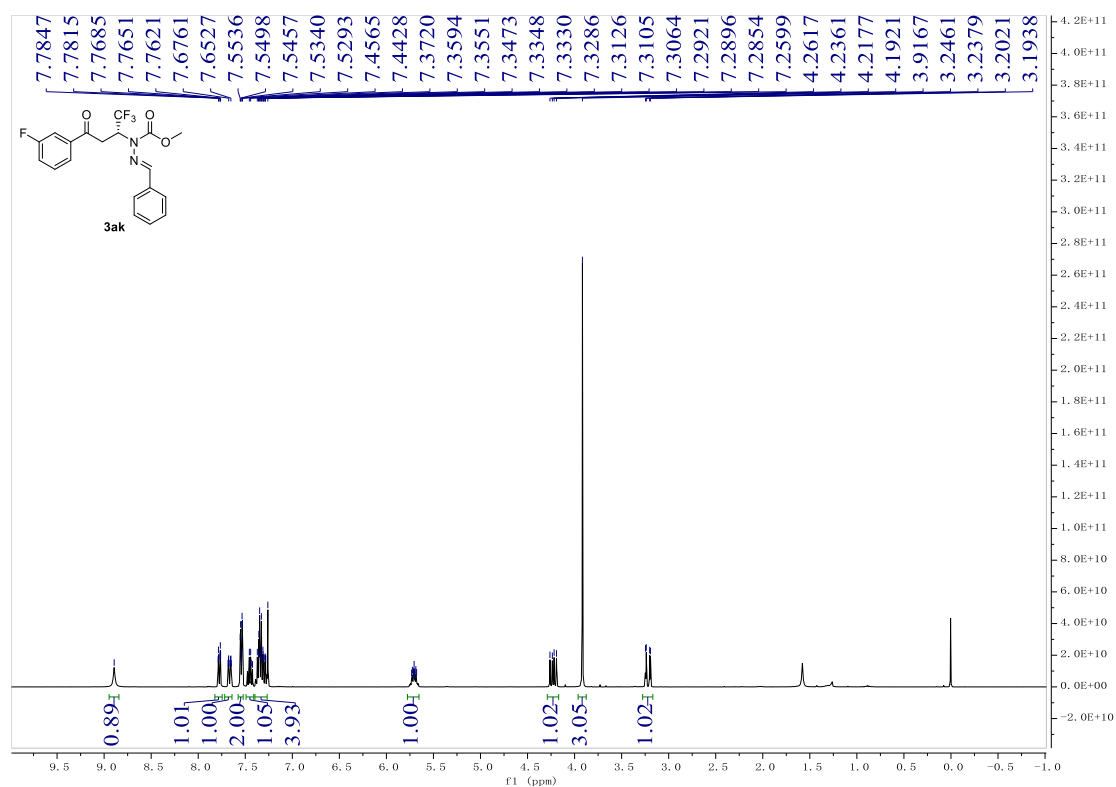

**<sup>13</sup>C{<sup>1</sup>H} NMR of 3ak (100 MHz, CDCl<sub>3</sub>)**

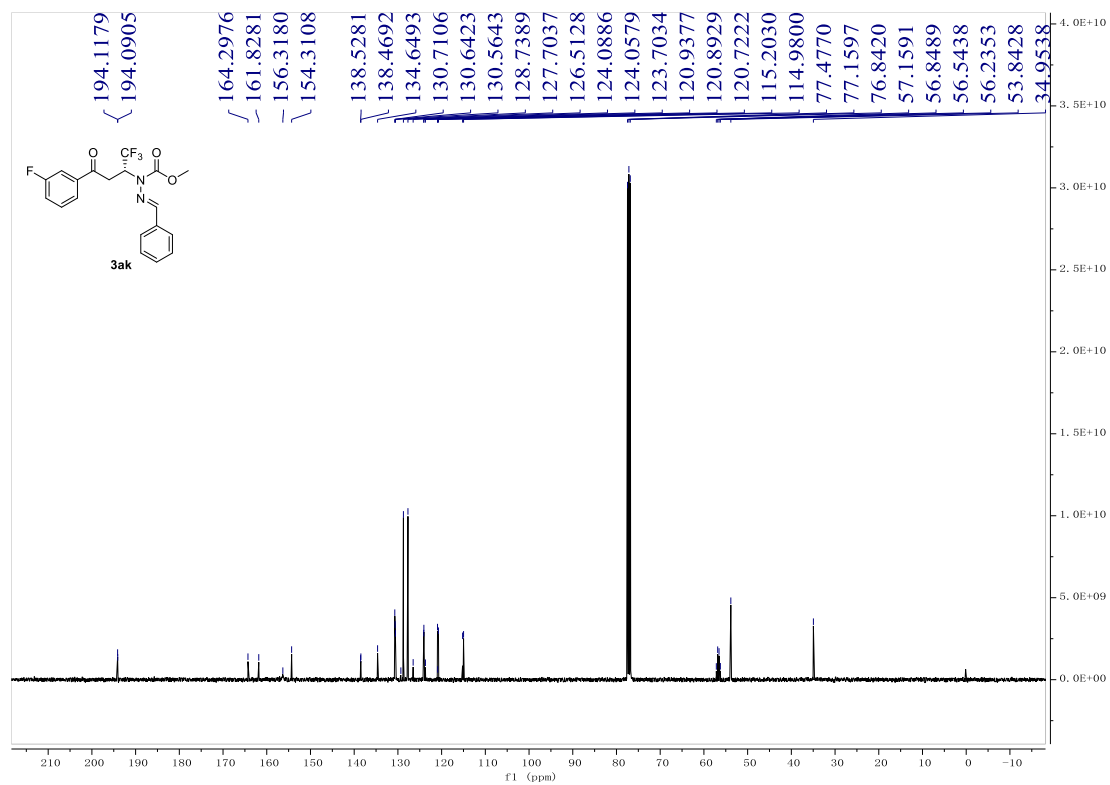

**<sup>19</sup>F{<sup>1</sup>H} NMR of 3ak (376 MHz, CDCl<sub>3</sub>)**

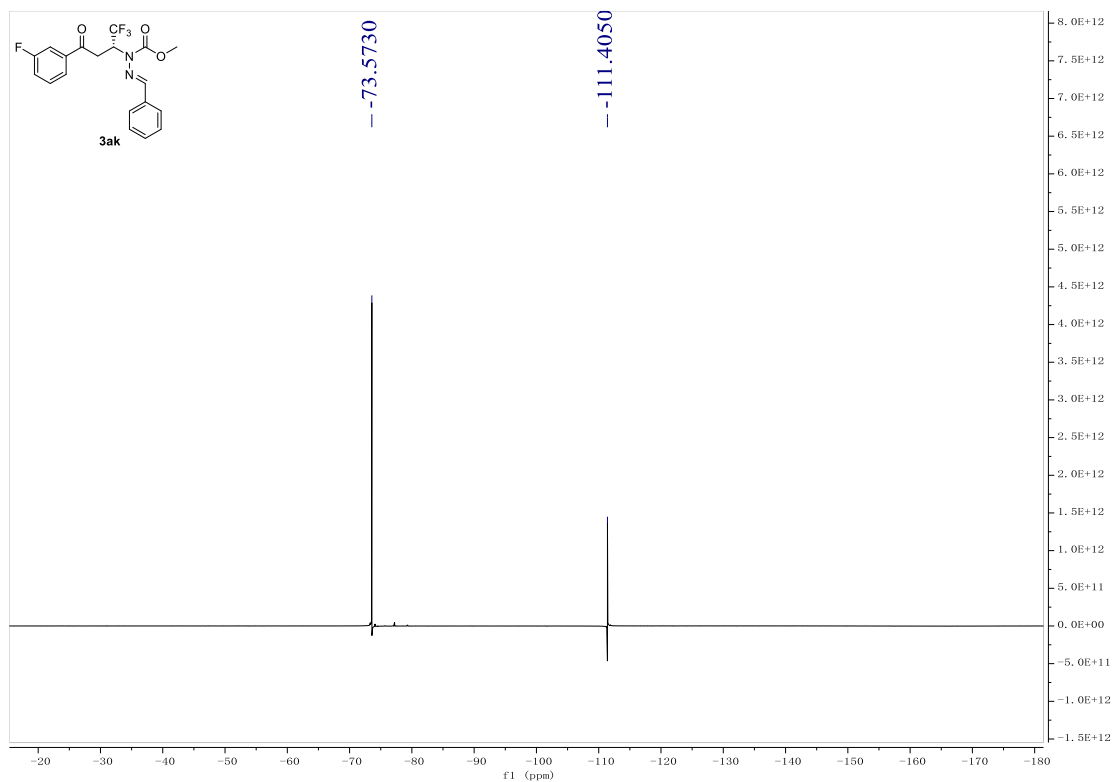

**$^1\text{H}$  NMR of 3al (400 MHz,  $\text{CDCl}_3$ )**

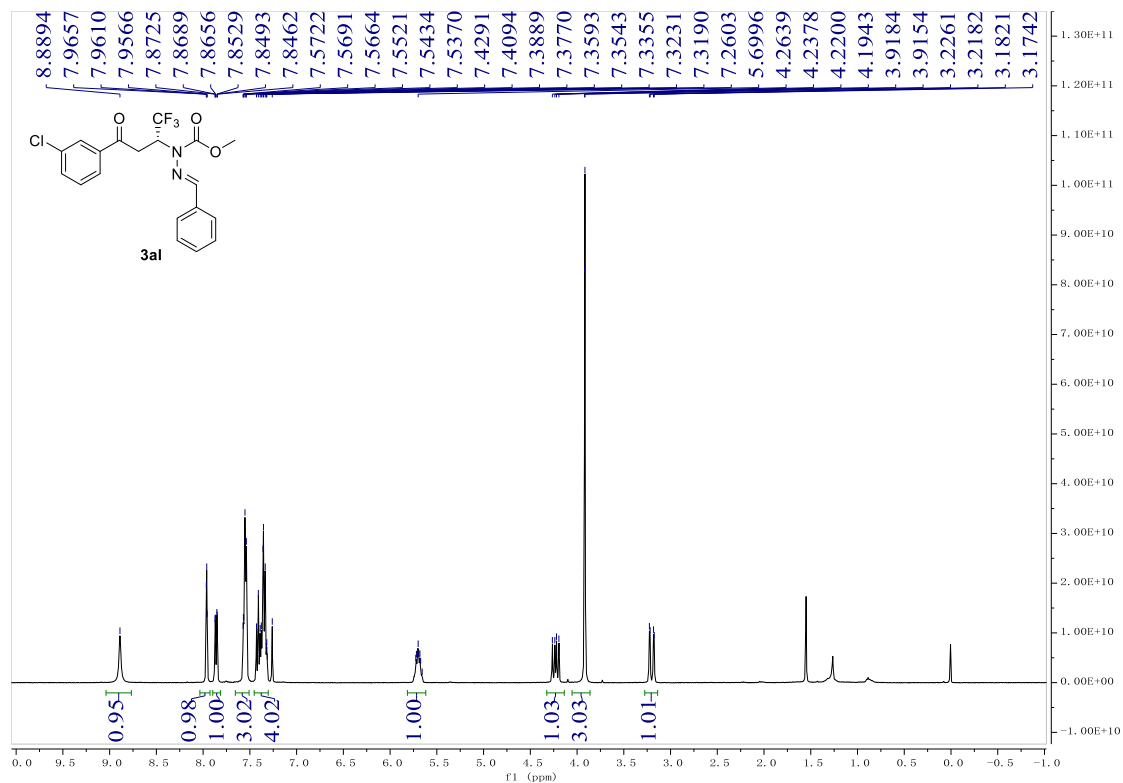

**$^{13}\text{C}\{^1\text{H}\}$  NMR of 3al (100 MHz,  $\text{CDCl}_3$ )**

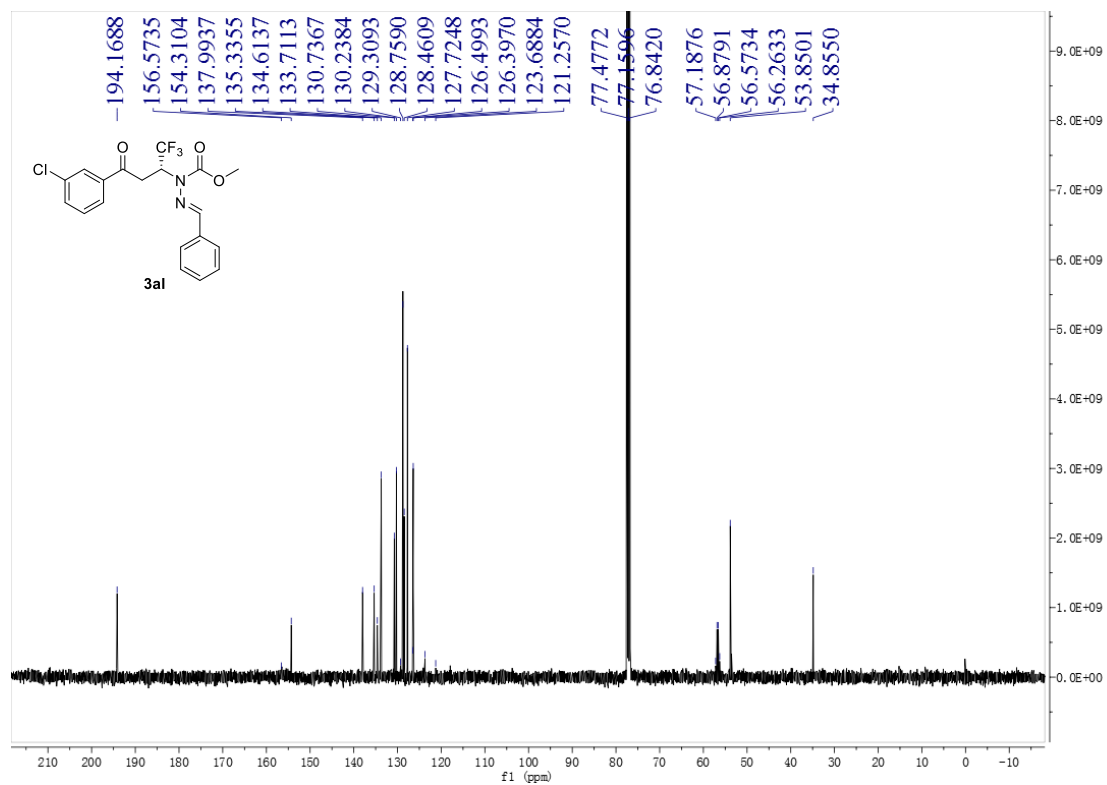

**<sup>19</sup>F{<sup>1</sup>H} NMR of 3al (376 MHz, CDCl<sub>3</sub>)**

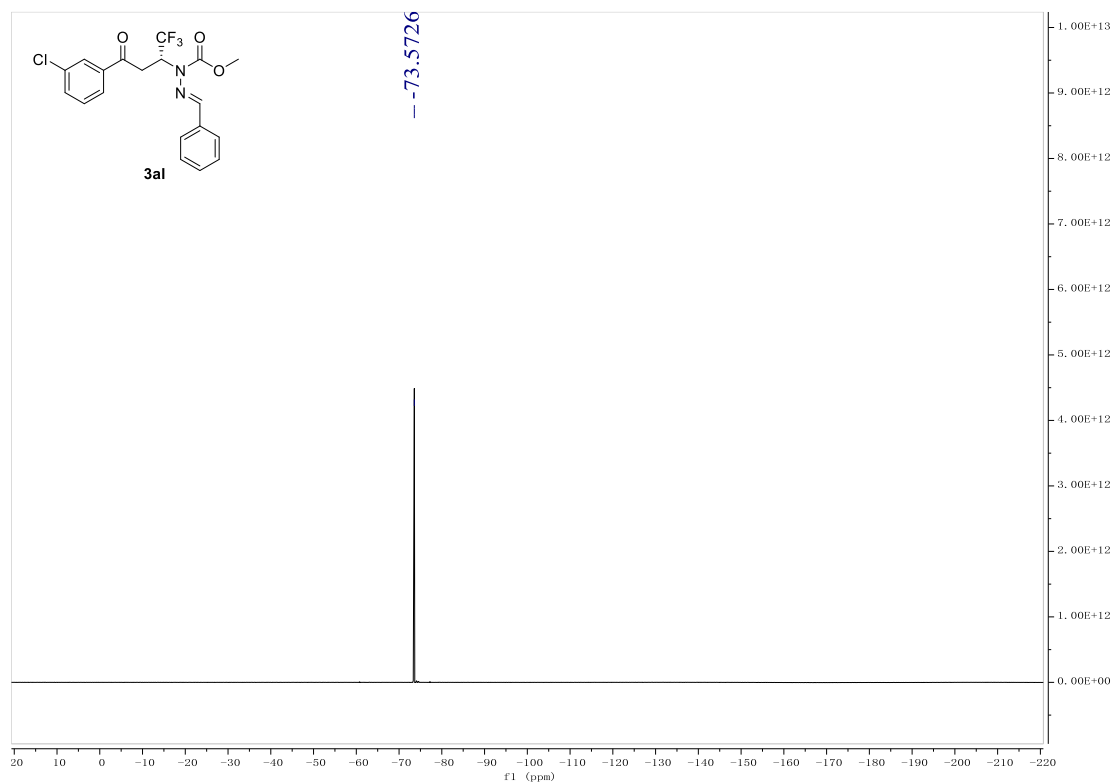

**<sup>1</sup>H NMR of 3am (400 MHz, CDCl<sub>3</sub>)**

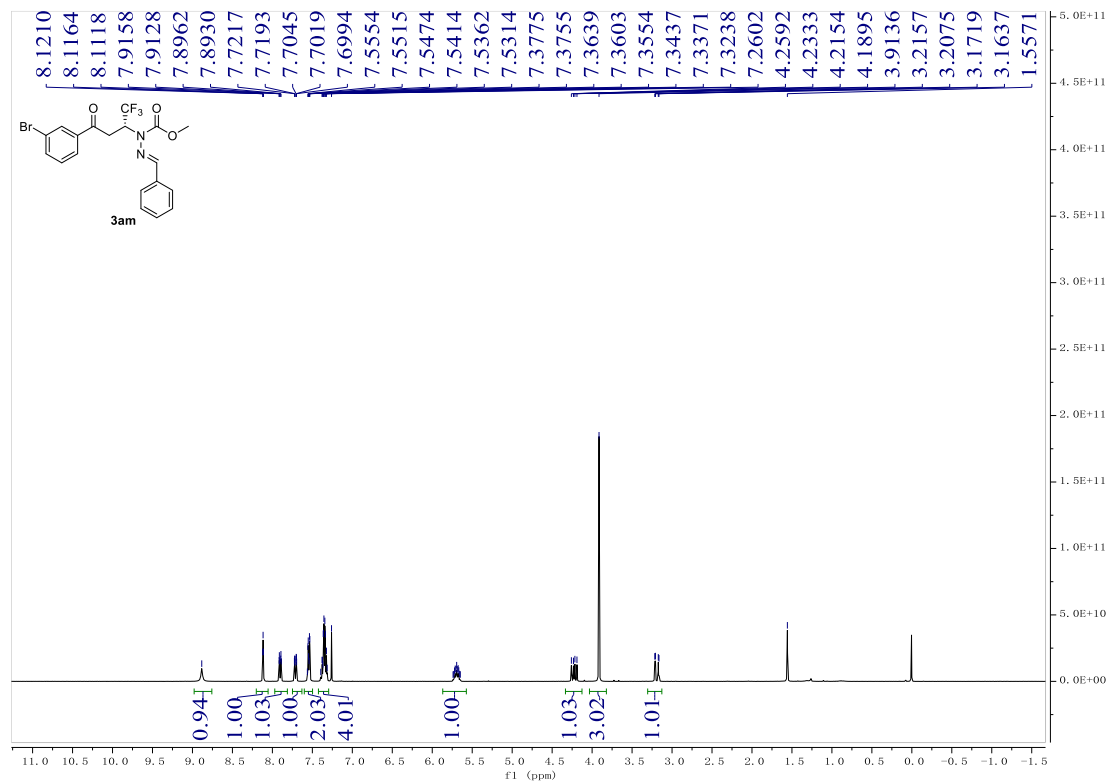

**<sup>13</sup>C{<sup>1</sup>H} NMR of 3am (100 MHz, CDCl<sub>3</sub>)**

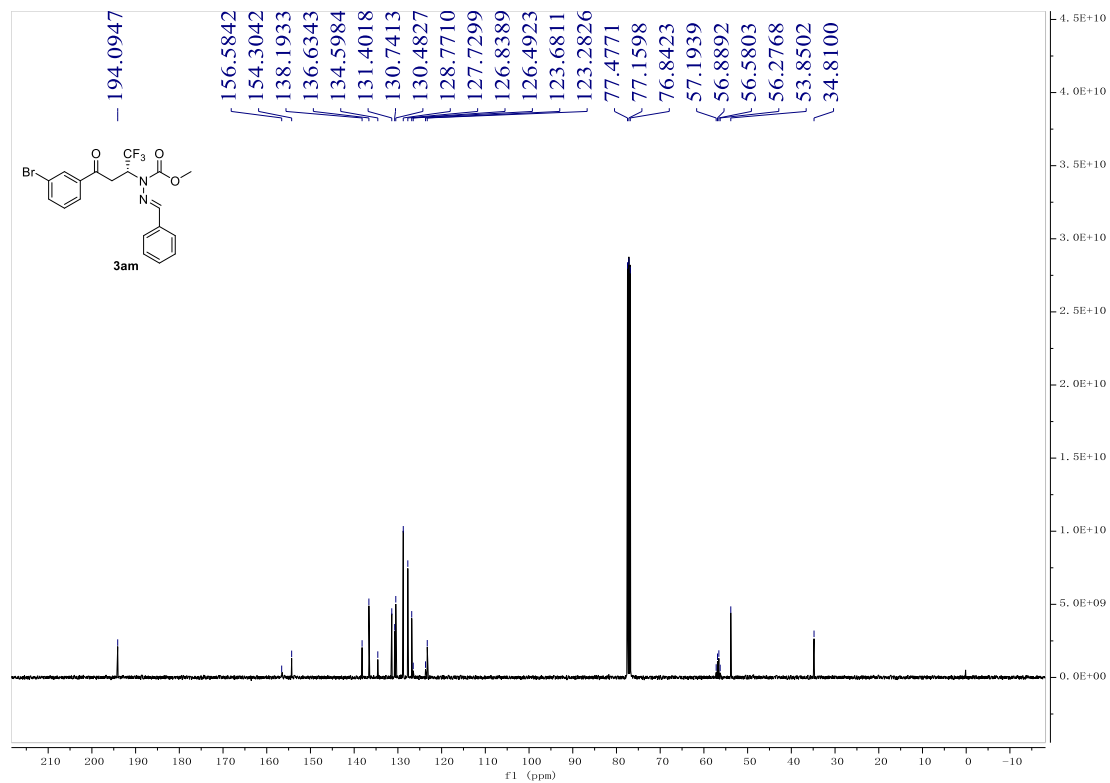

**<sup>19</sup>F{<sup>1</sup>H} NMR of 3am (376 MHz, CDCl<sub>3</sub>)**

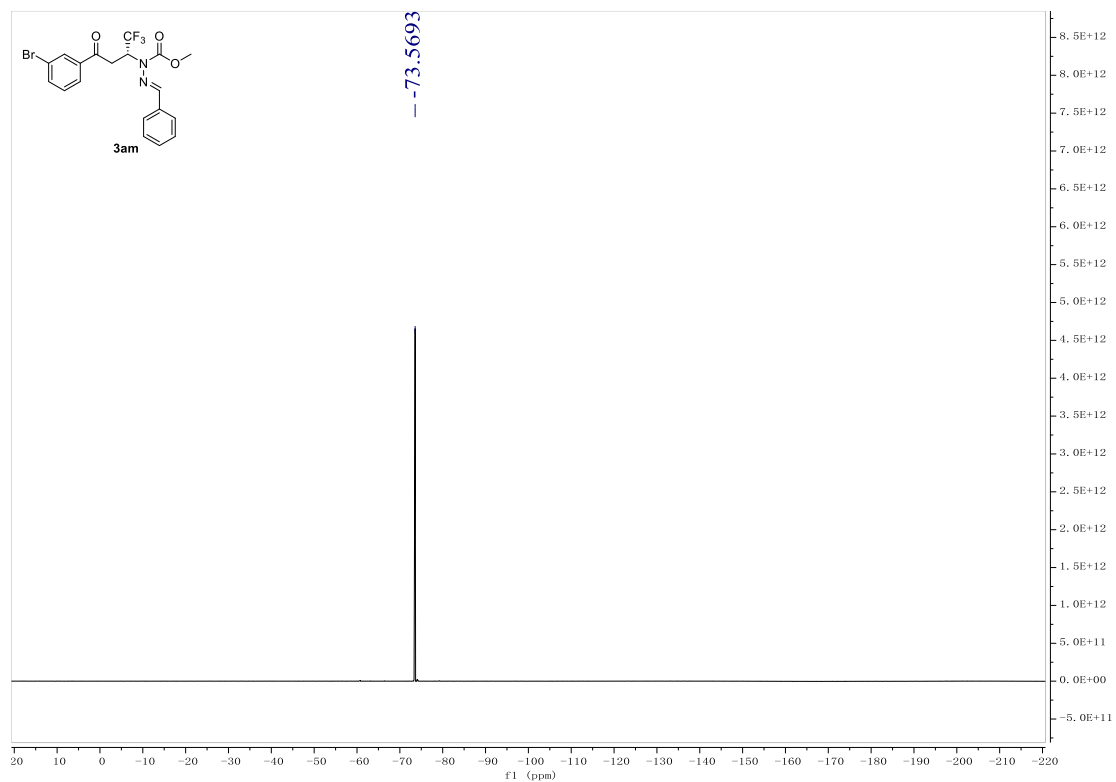

**<sup>1</sup>H NMR of 3am (400 MHz, CDCl<sub>3</sub>)**

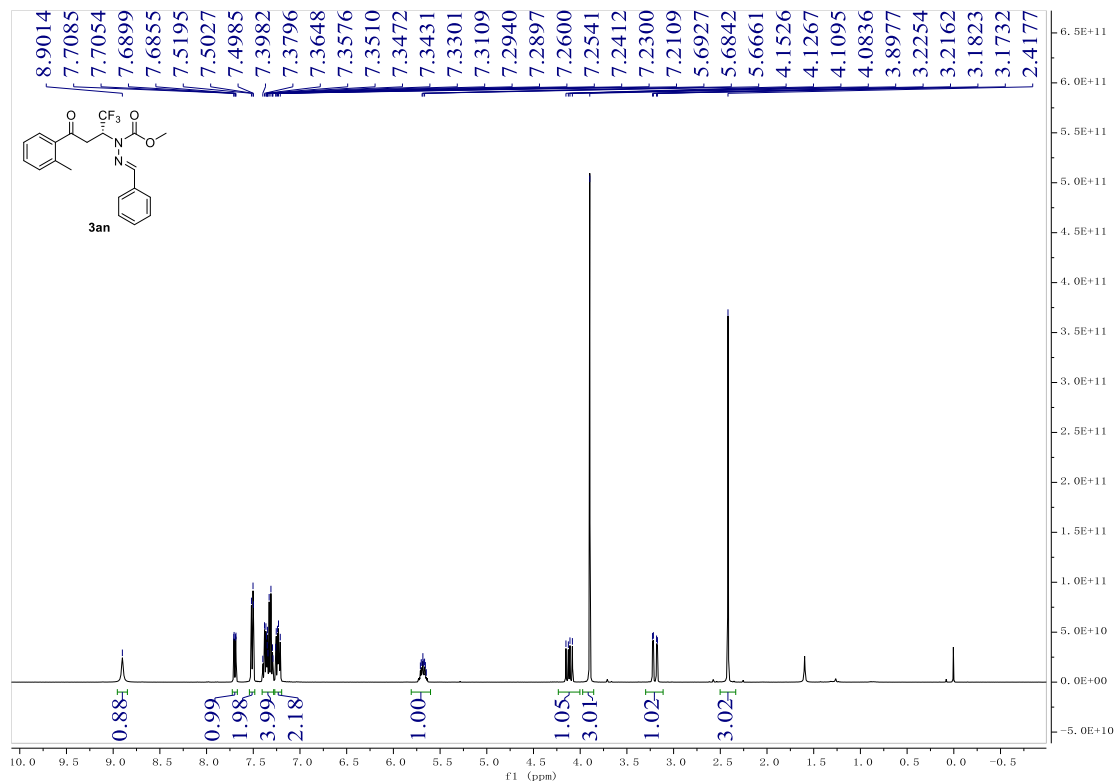

**<sup>13</sup>C{<sup>1</sup>H} NMR of 3am (100 MHz, CDCl<sub>3</sub>)**

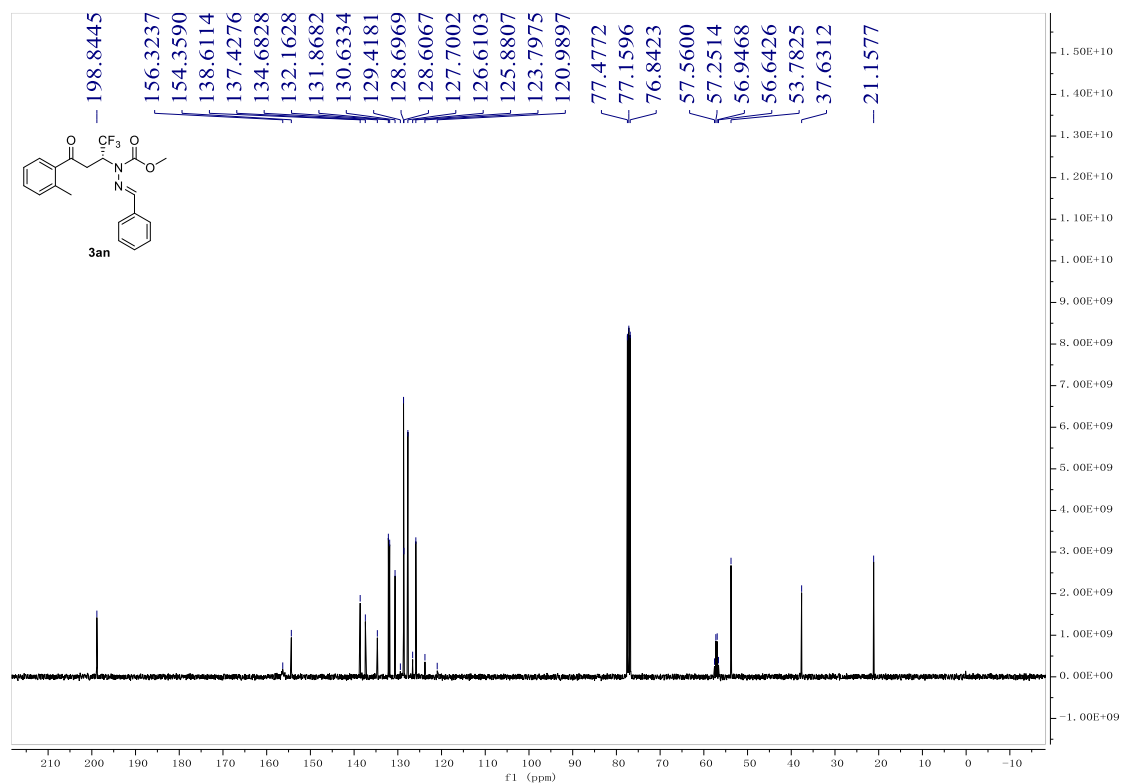

**<sup>19</sup>F{<sup>1</sup>H} NMR of 3an (376 MHz, CDCl<sub>3</sub>)**

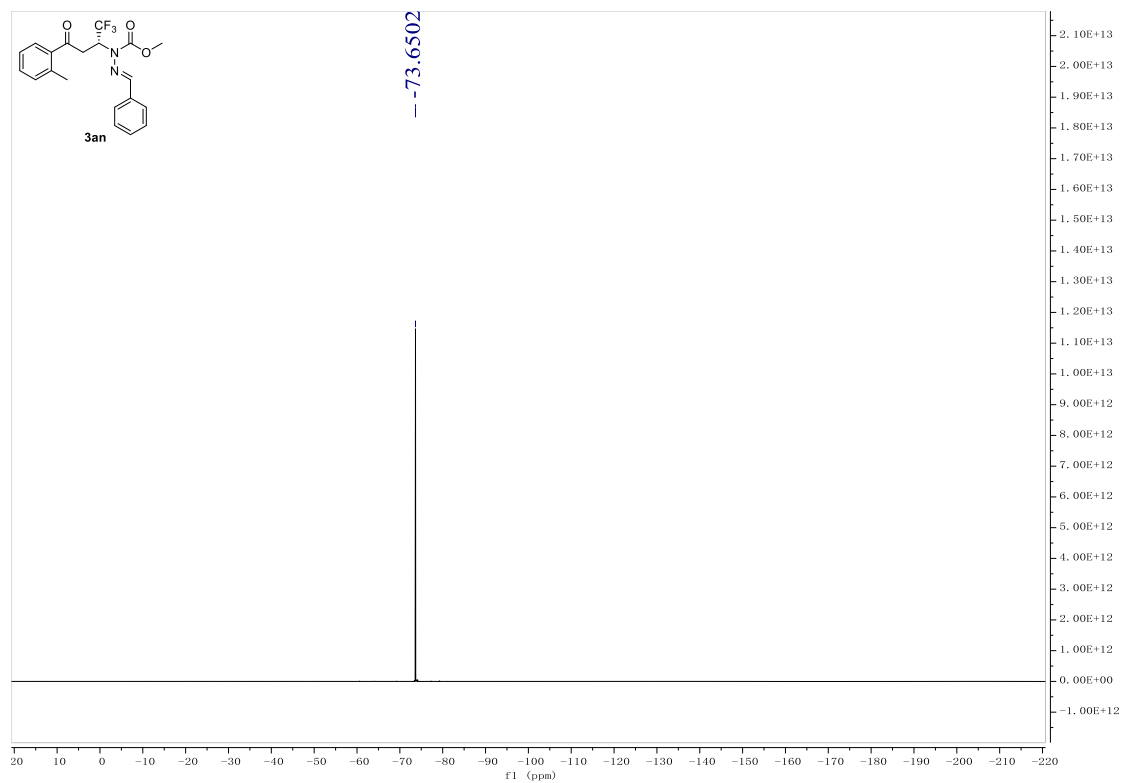

**<sup>1</sup>H NMR of 3ao (400 MHz, CDCl<sub>3</sub>)**

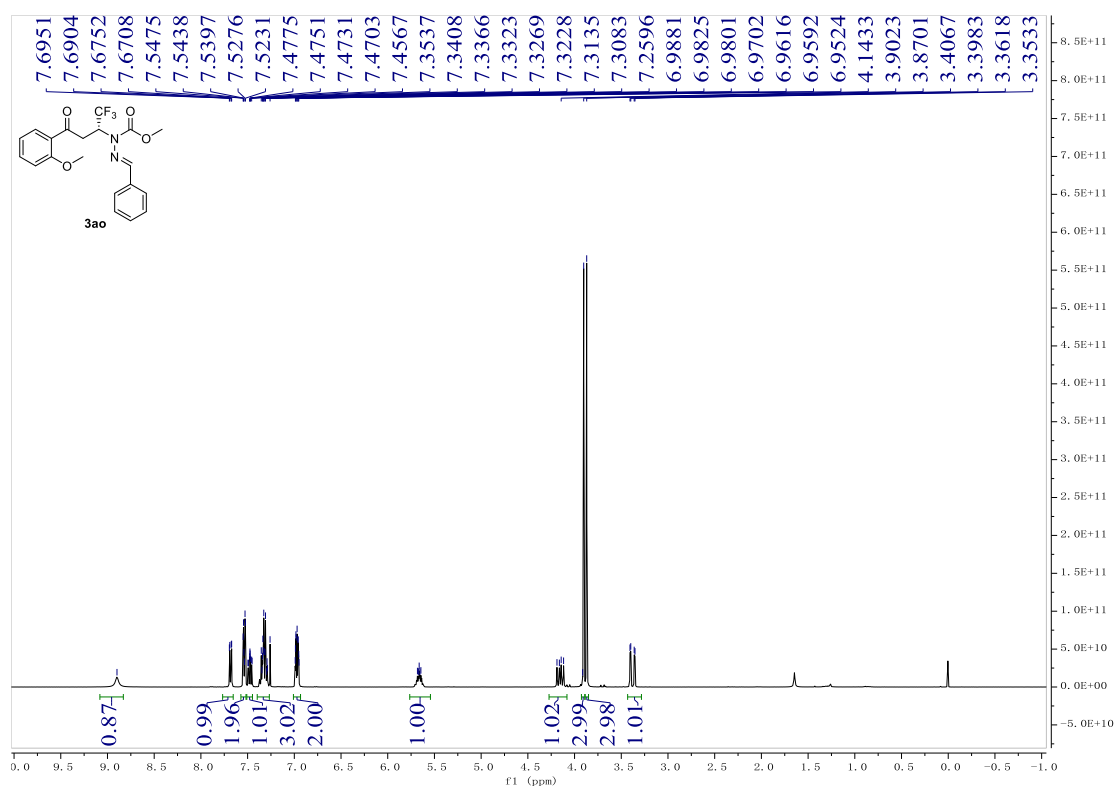

**<sup>13</sup>C{<sup>1</sup>H} NMR of 3ao (100 MHz, CDCl<sub>3</sub>)**

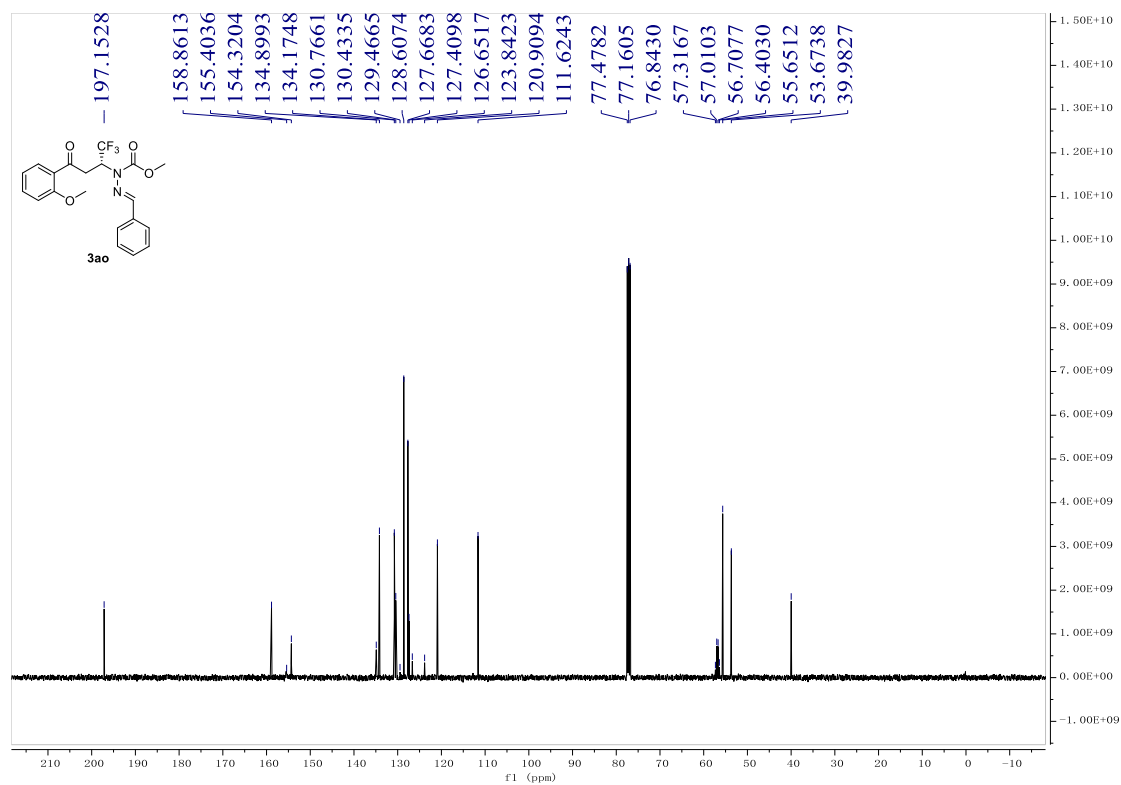

**<sup>19</sup>F{<sup>1</sup>H} NMR of 3ao (376 MHz, CDCl<sub>3</sub>)**

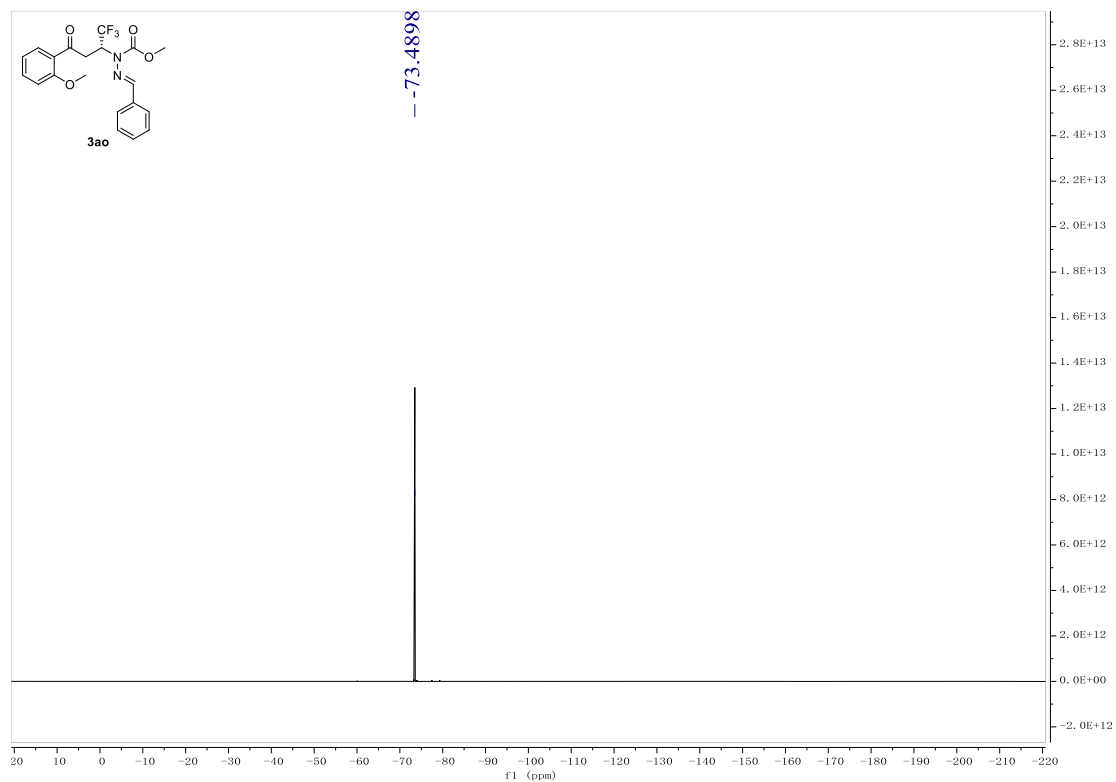

**$^1\text{H}$  NMR of 3ap (400 MHz,  $\text{CDCl}_3$ )**

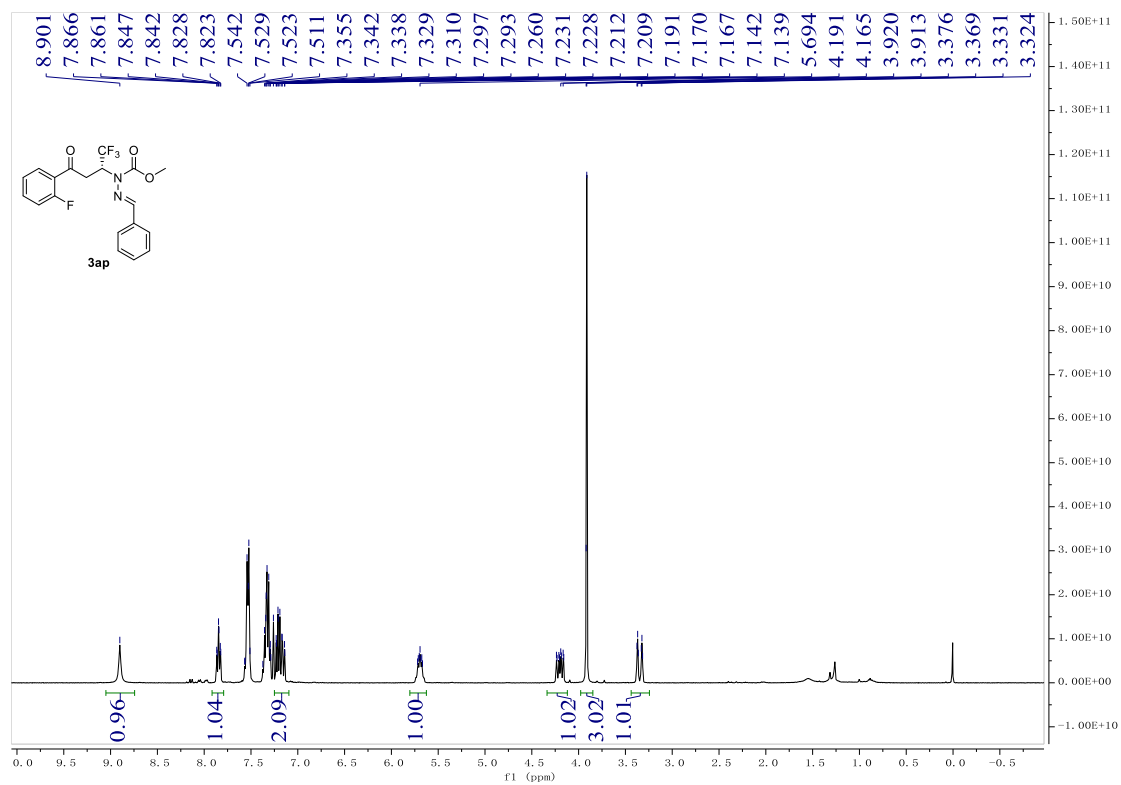

**$^{13}\text{C}\{^1\text{H}\}$  NMR of 3ap (100 MHz,  $\text{CDCl}_3$ )**



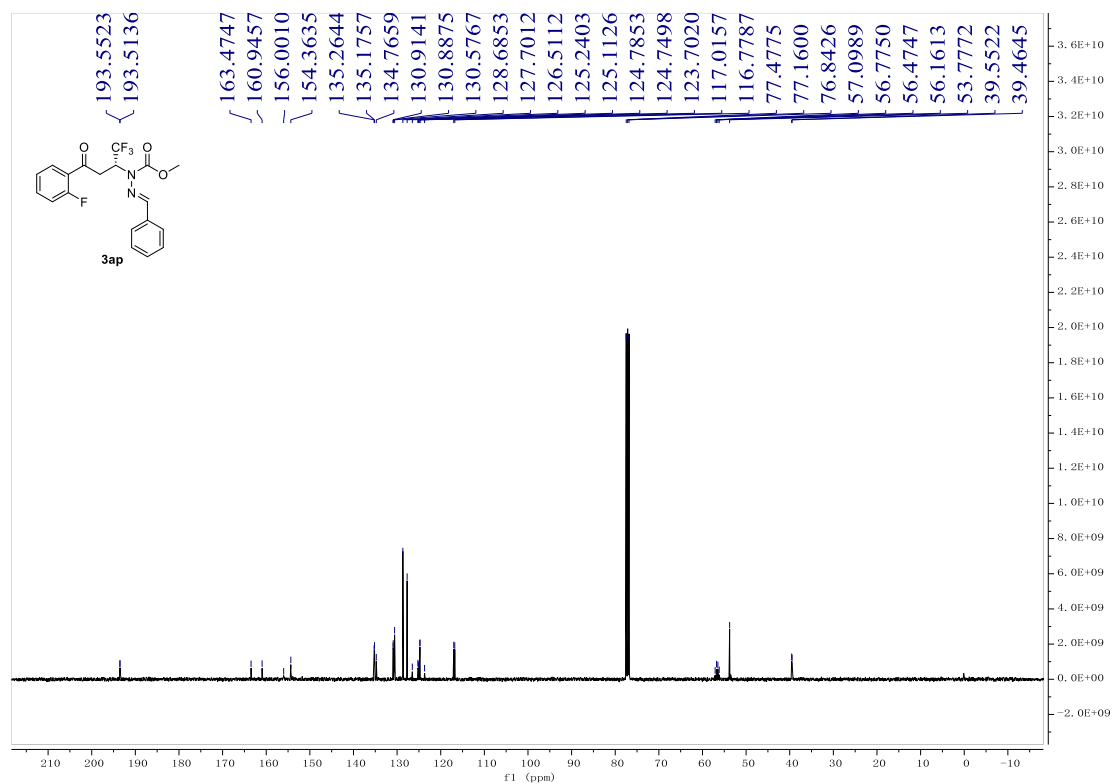

**$^{19}\text{F}\{^1\text{H}\}$  NMR of 3ap (376 MHz,  $\text{CDCl}_3$ )**

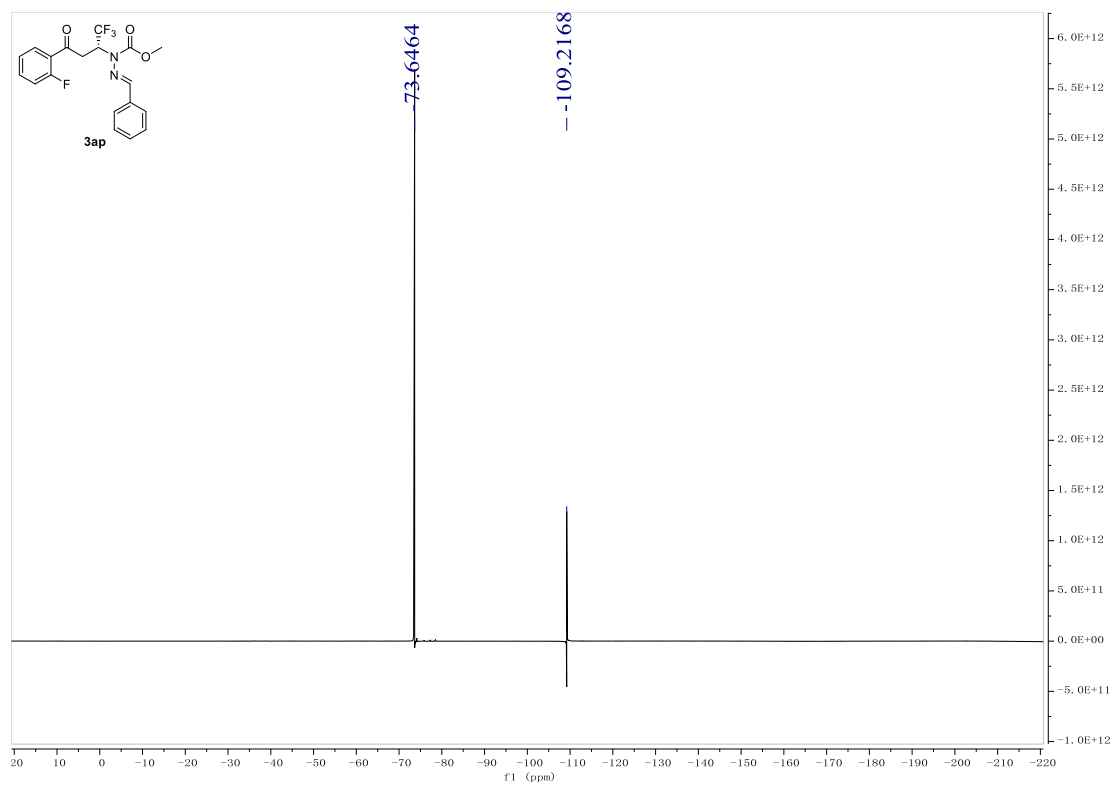

**$^1\text{H}$  NMR of 3aq (400 MHz,  $\text{CDCl}_3$ )**

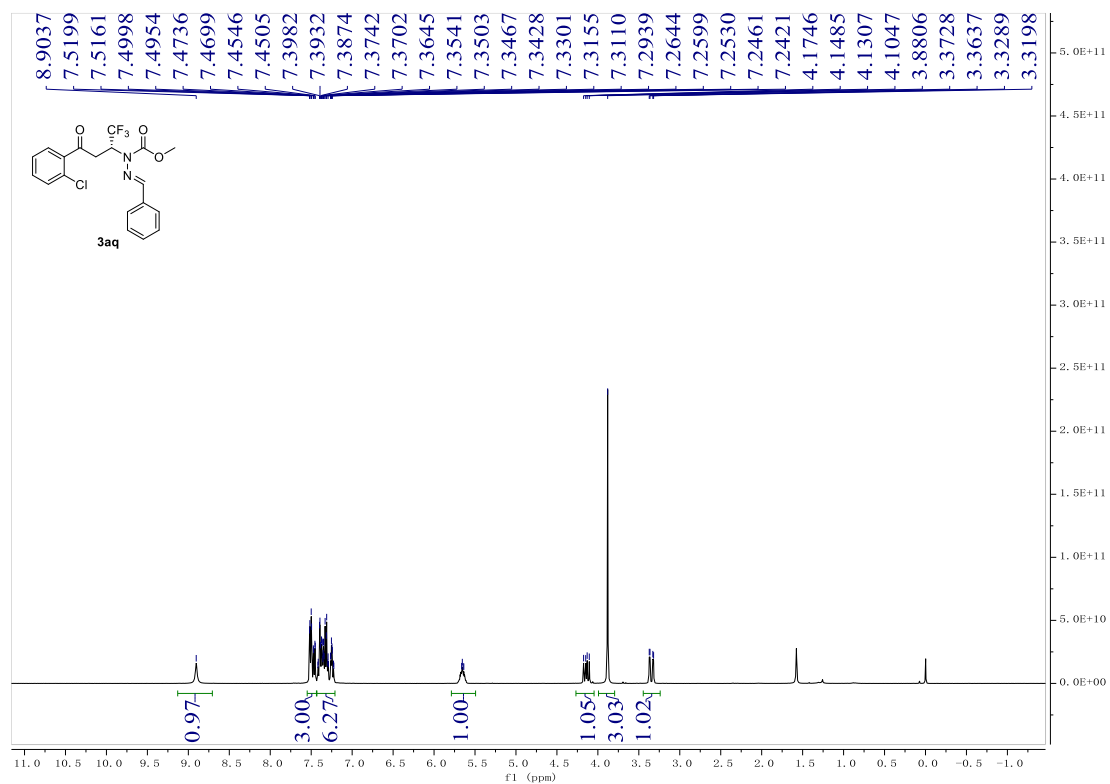

**<sup>13</sup>C{<sup>1</sup>H} NMR of 3aq (100 MHz, CDCl<sub>3</sub>)**

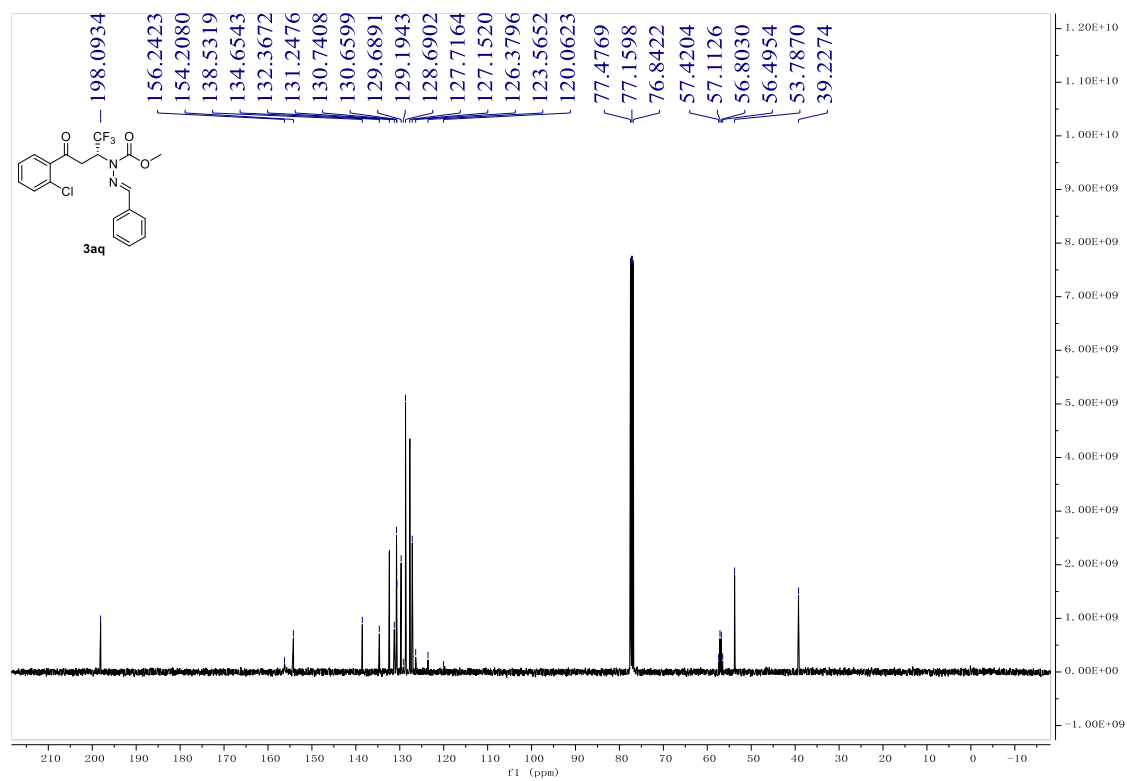

**<sup>19</sup>F{<sup>1</sup>H} NMR of 3aq (376 MHz, CDCl<sub>3</sub>)**

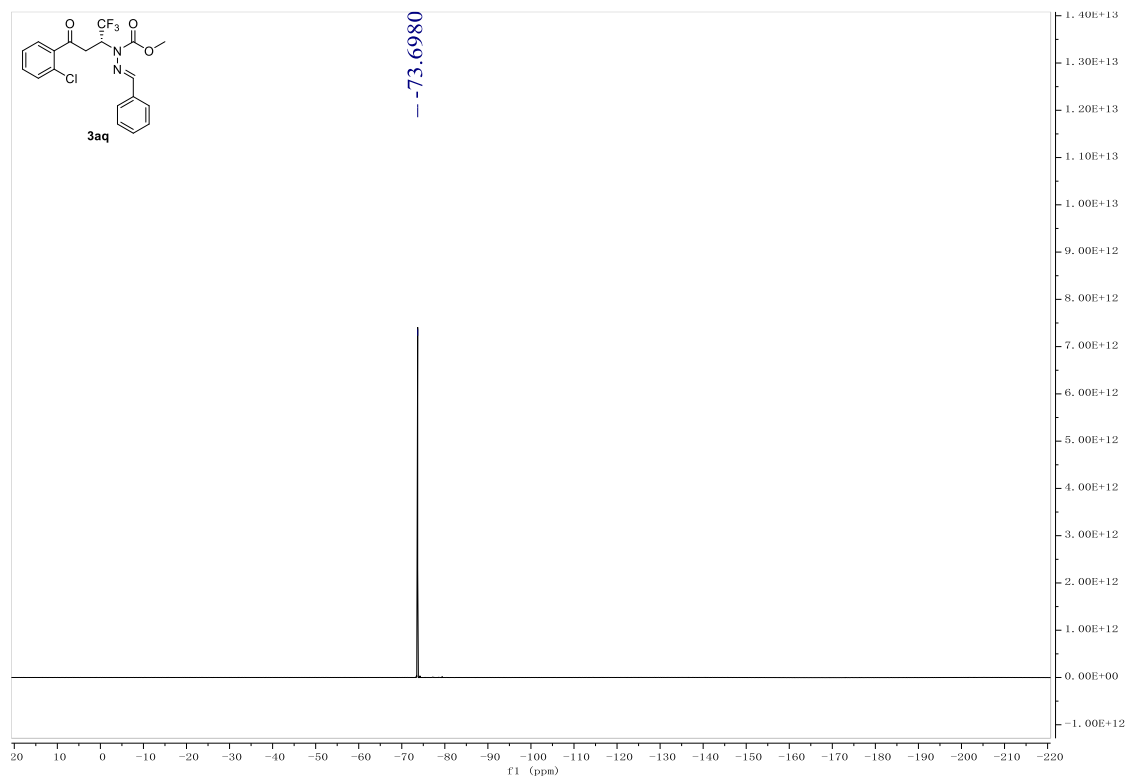

**<sup>1</sup>H NMR of 3ar (400 MHz, CDCl<sub>3</sub>)**

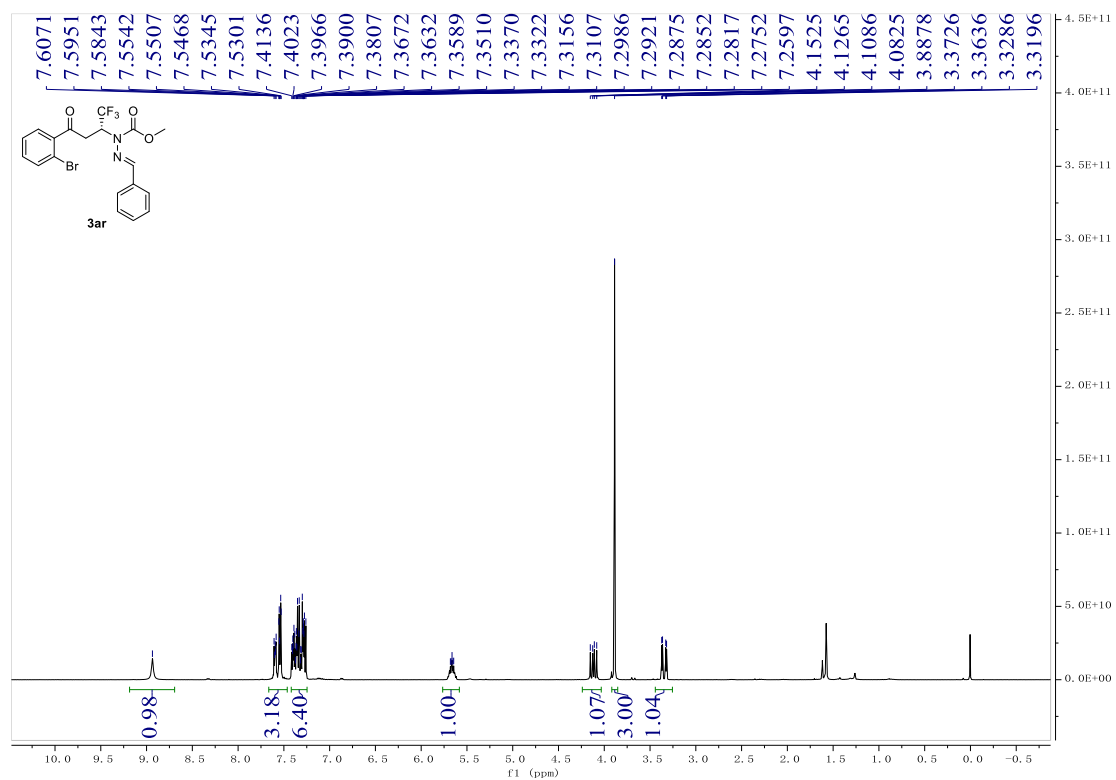

**<sup>13</sup>C{<sup>1</sup>H} NMR of 3ar (100 MHz, CDCl<sub>3</sub>)**

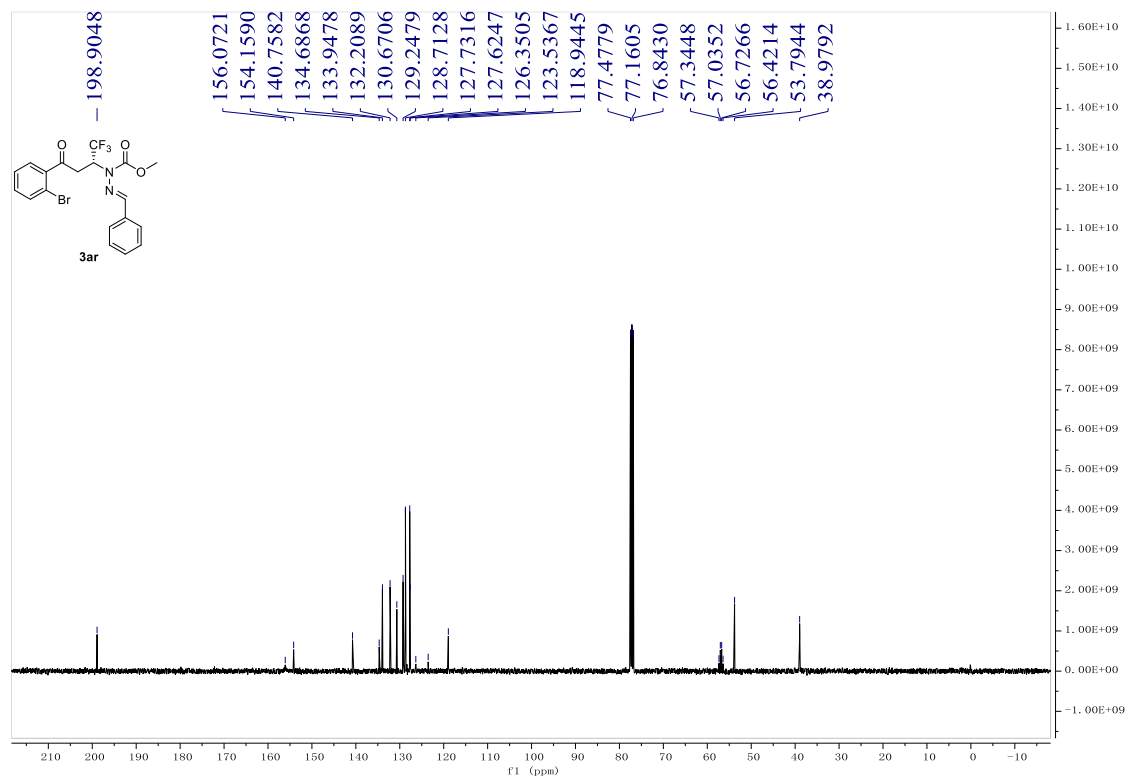

**<sup>19</sup>F{<sup>1</sup>H} NMR of 3ar (376 MHz, CDCl<sub>3</sub>)**

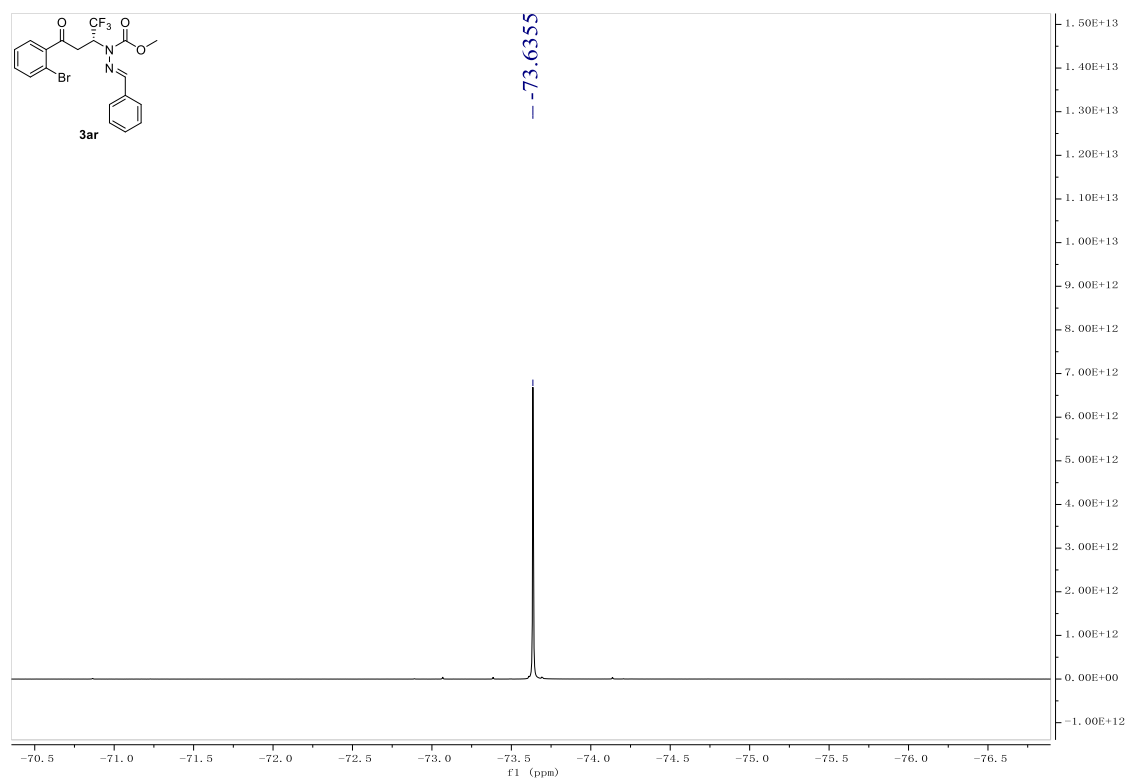

**<sup>1</sup>H NMR of 3as (400 MHz, CDCl<sub>3</sub>)**

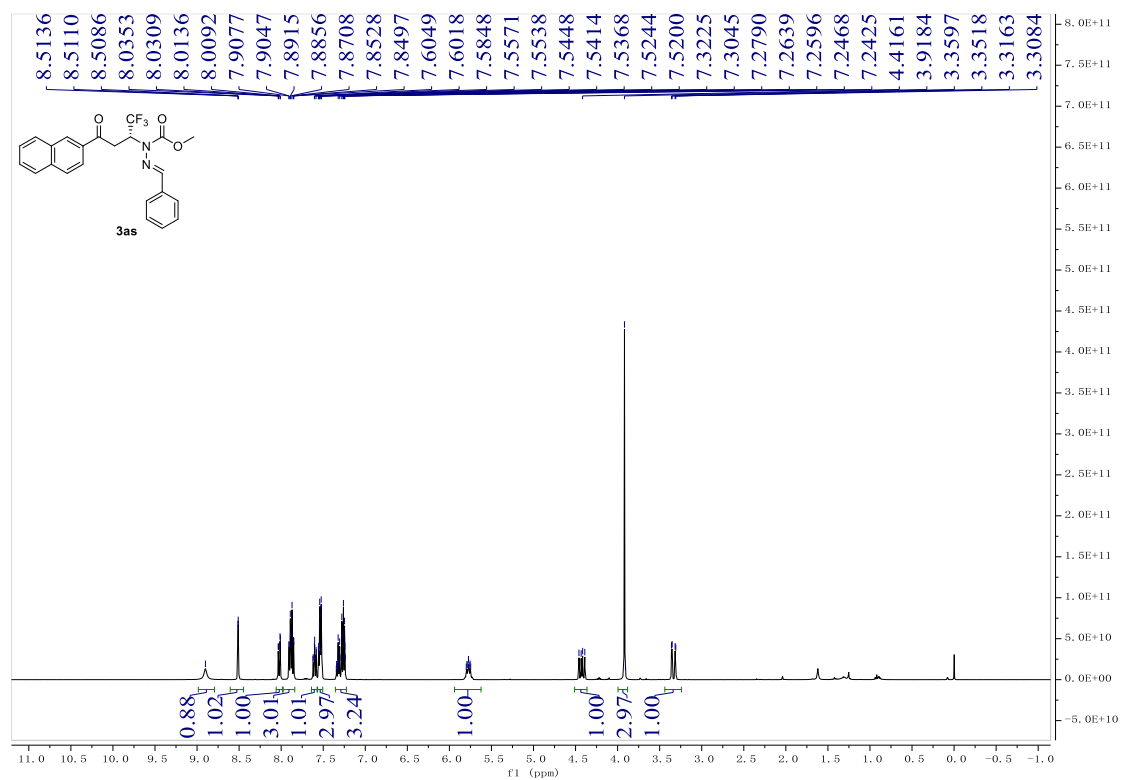

**<sup>13</sup>C{<sup>1</sup>H} NMR of 3as (100 MHz, CDCl<sub>3</sub>)**

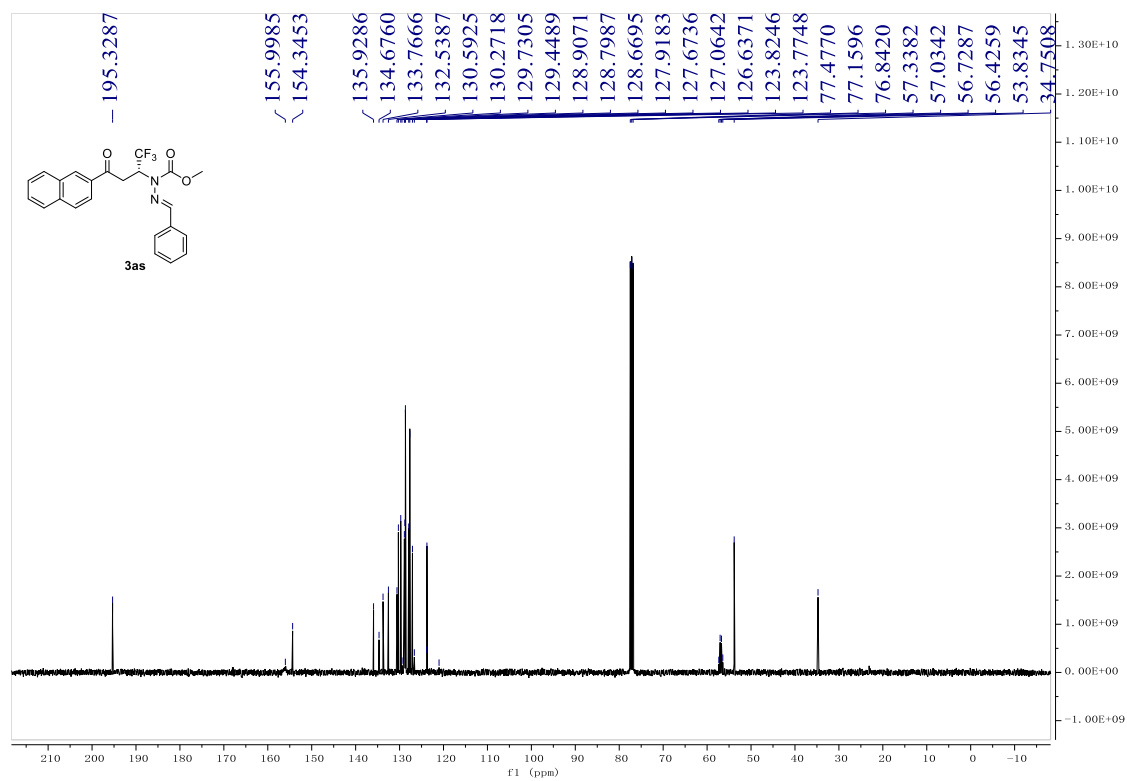

**<sup>19</sup>F{<sup>1</sup>H} NMR of 3as (376 MHz, CDCl<sub>3</sub>)**

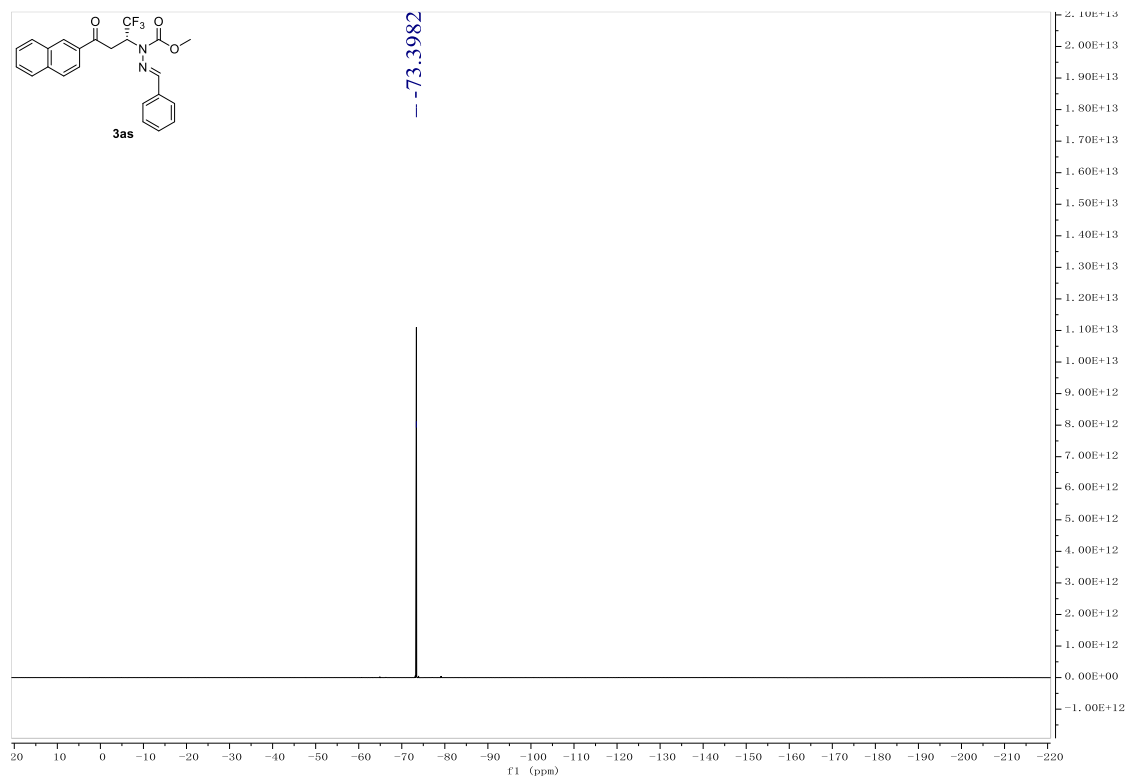

**$^1\text{H}$  NMR of 3at (400 MHz,  $\text{CDCl}_3$ )**

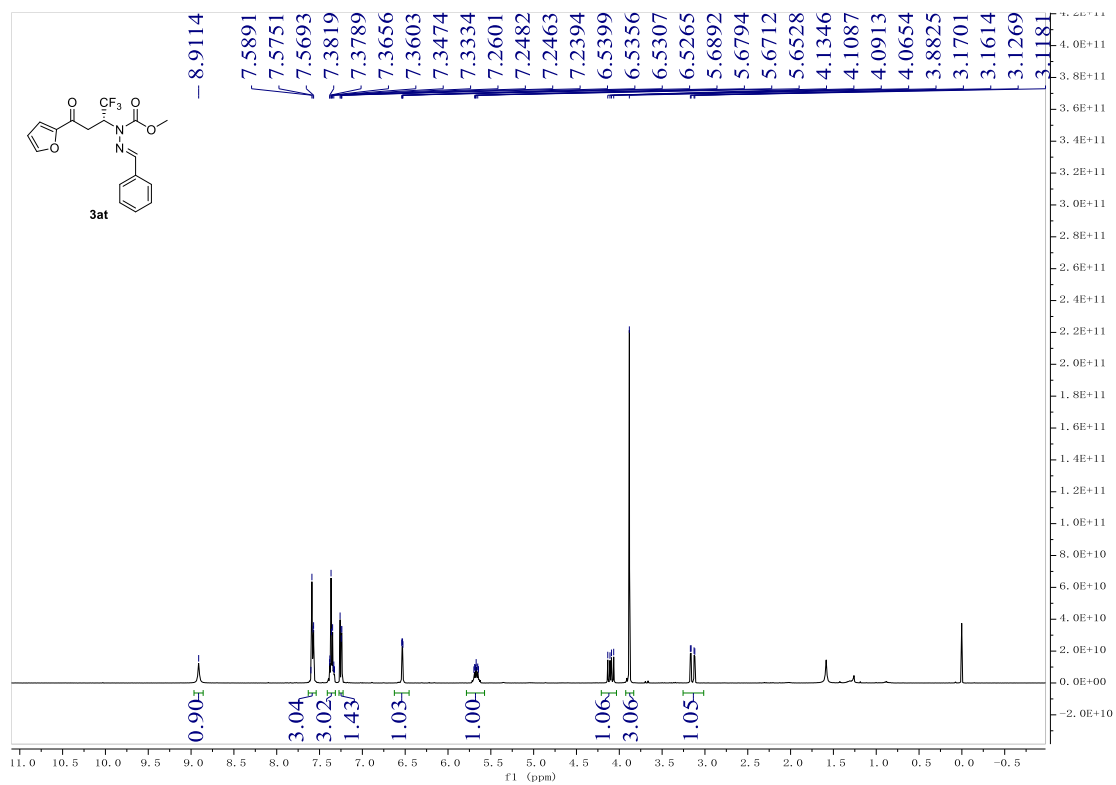

**$^{13}\text{C}\{^1\text{H}\}$  NMR of 3at (100 MHz,  $\text{CDCl}_3$ )**

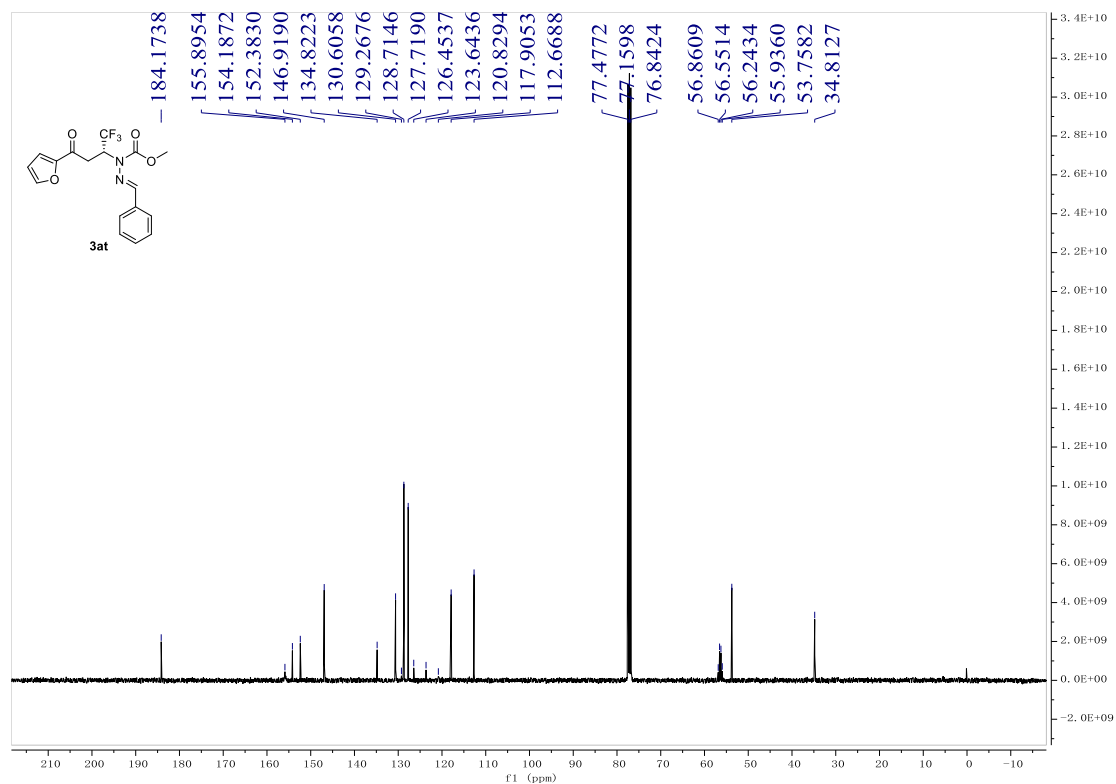

**<sup>19</sup>F{<sup>1</sup>H} NMR of 3at (376 MHz, CDCl<sub>3</sub>)**

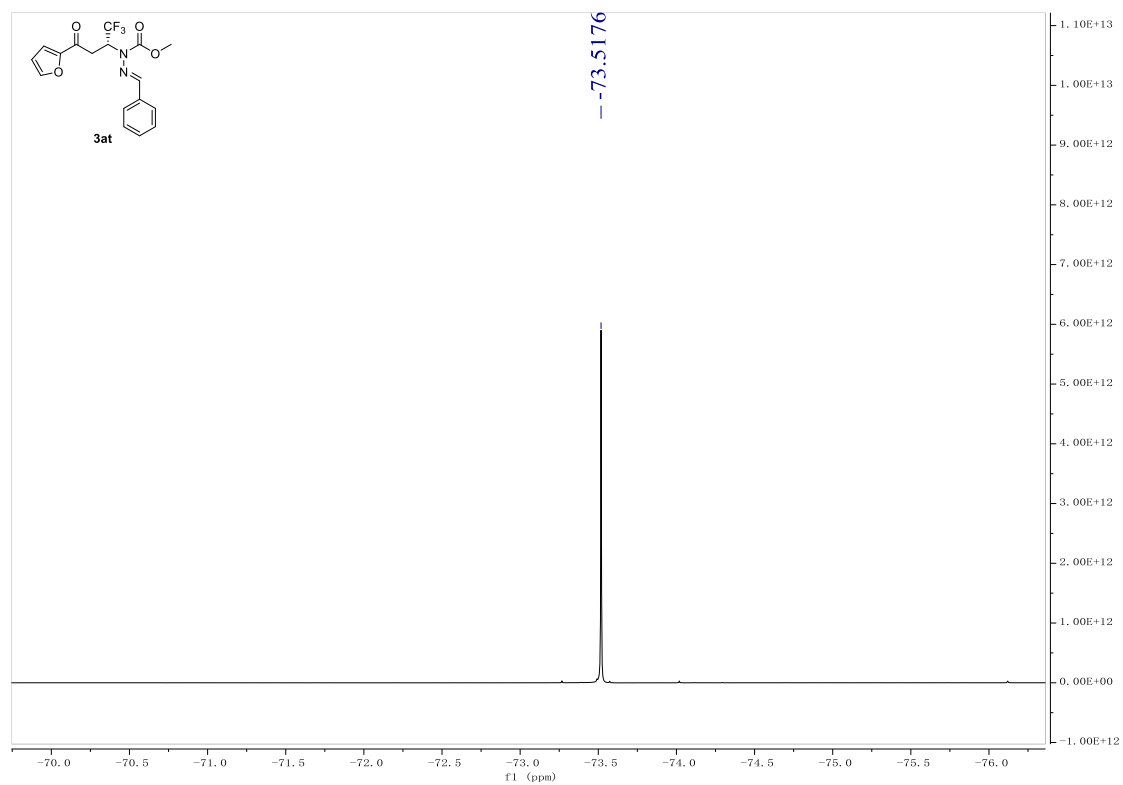

**<sup>1</sup>H NMR of 3au (400 MHz, CDCl<sub>3</sub>)**

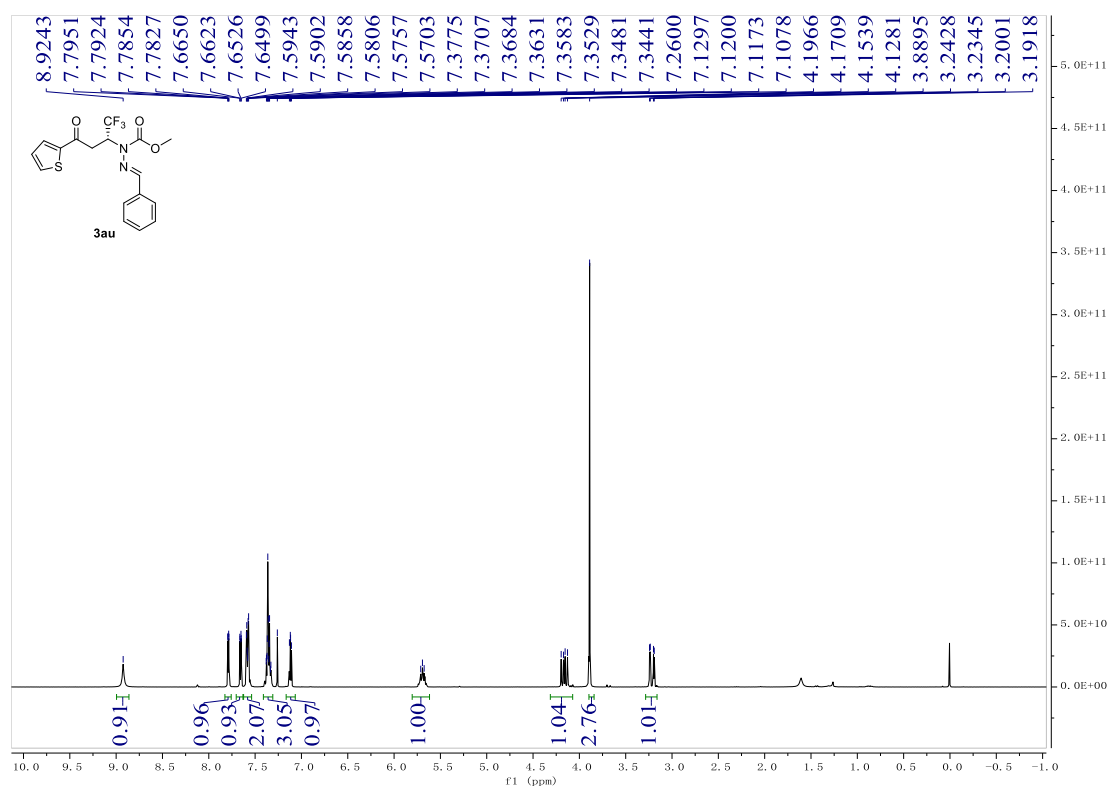

**<sup>13</sup>C{<sup>1</sup>H} NMR of 3au (100 MHz, CDCl<sub>3</sub>)**

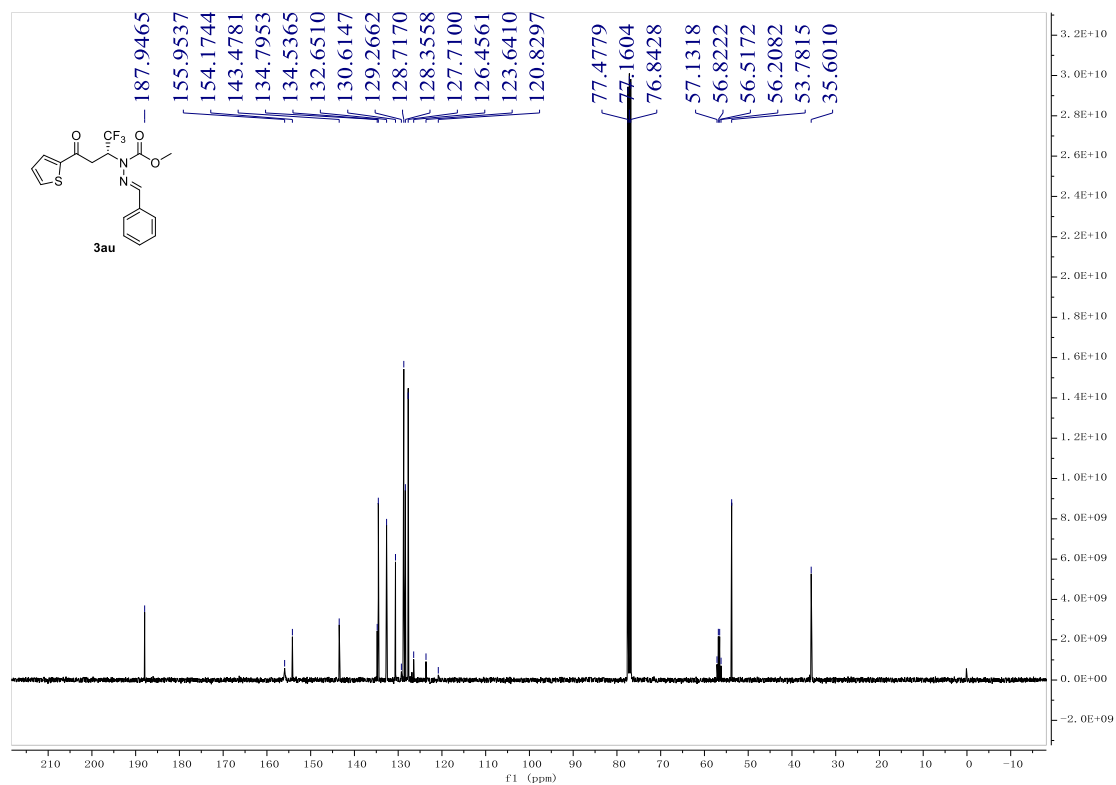

**<sup>19</sup>F{<sup>1</sup>H} NMR of 3au (376 MHz, CDCl<sub>3</sub>)**



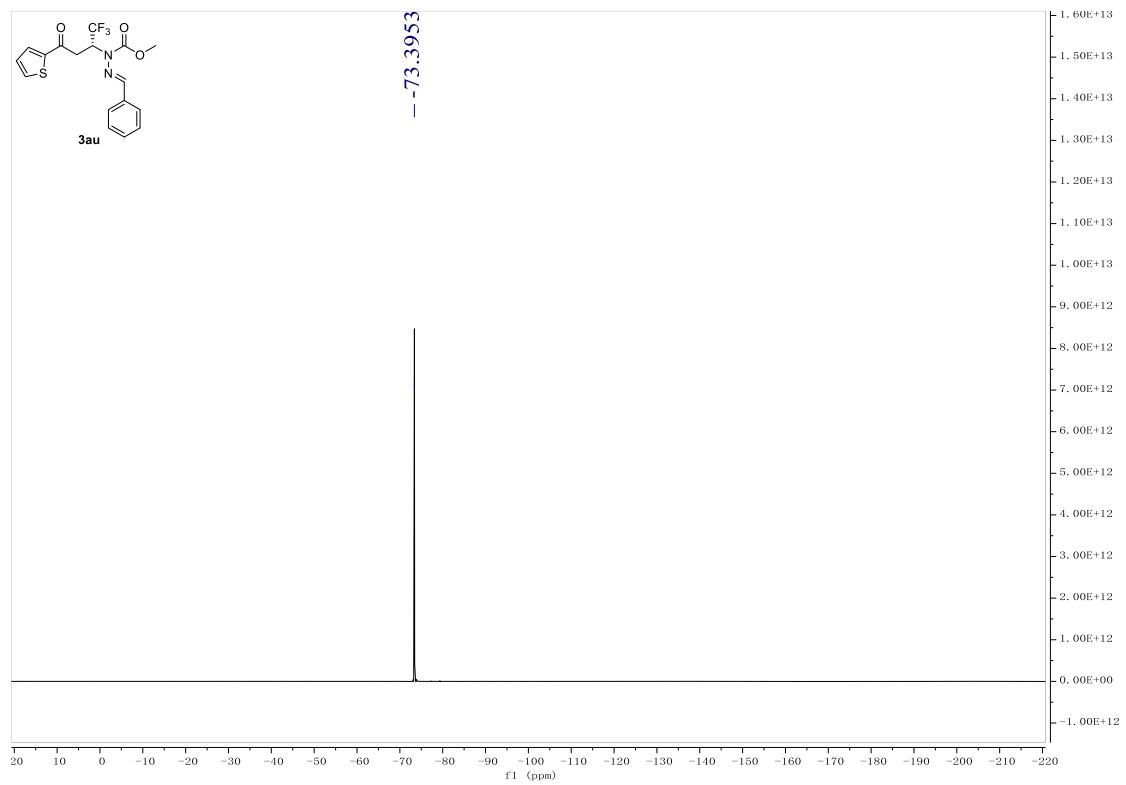

**<sup>1</sup>H NMR of 3av (400 MHz, CDCl<sub>3</sub>)**

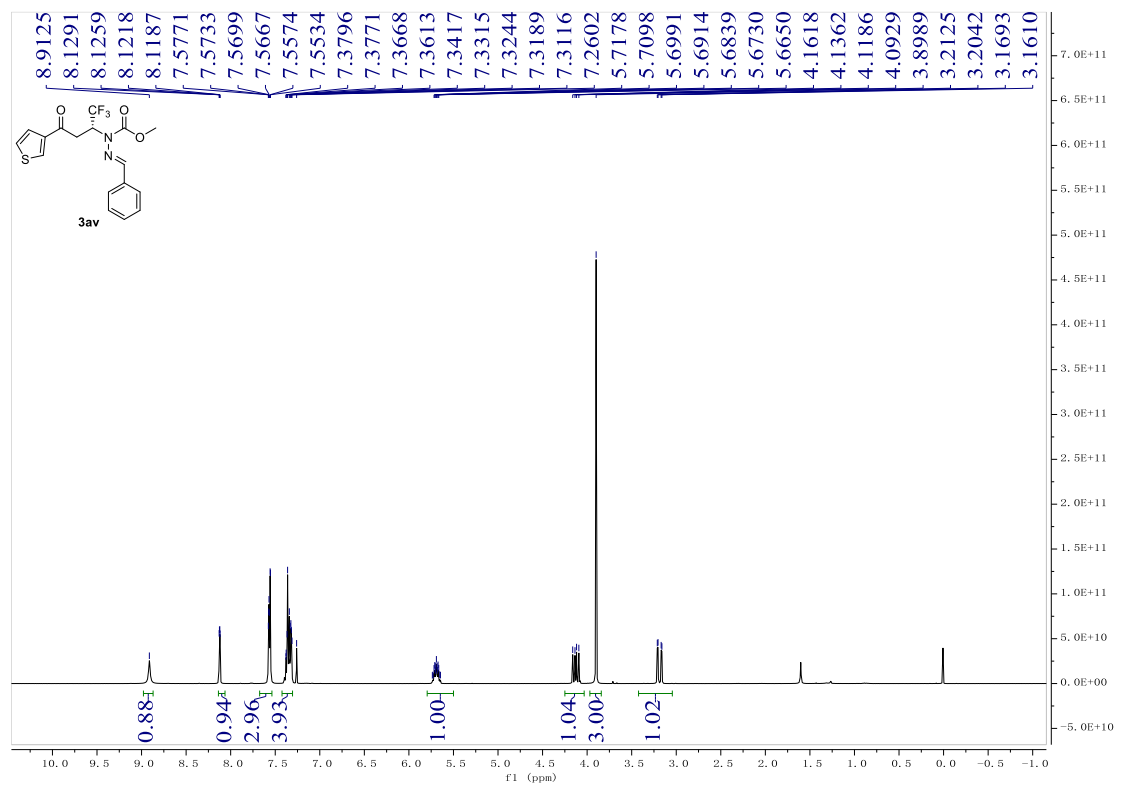

**<sup>13</sup>C{<sup>1</sup>H} NMR of 3av (100 MHz, CDCl<sub>3</sub>)**



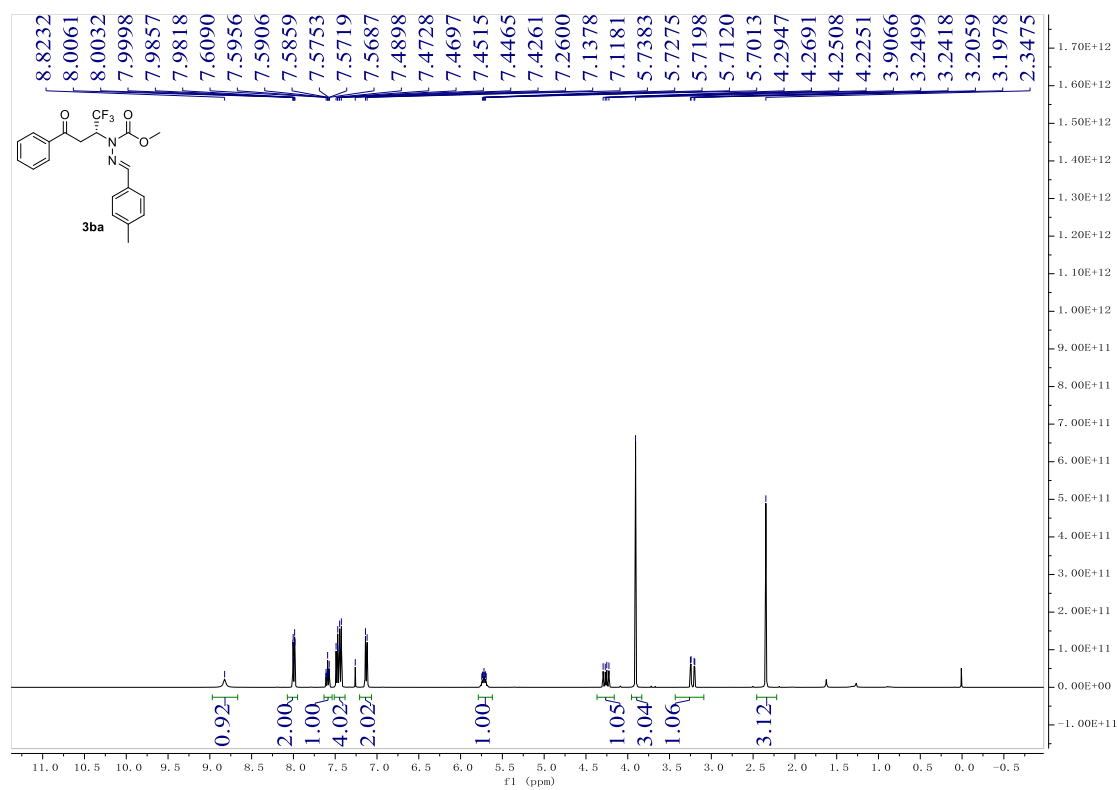

**<sup>13</sup>C{<sup>1</sup>H} NMR of 3ba (100 MHz, CDCl<sub>3</sub>)**

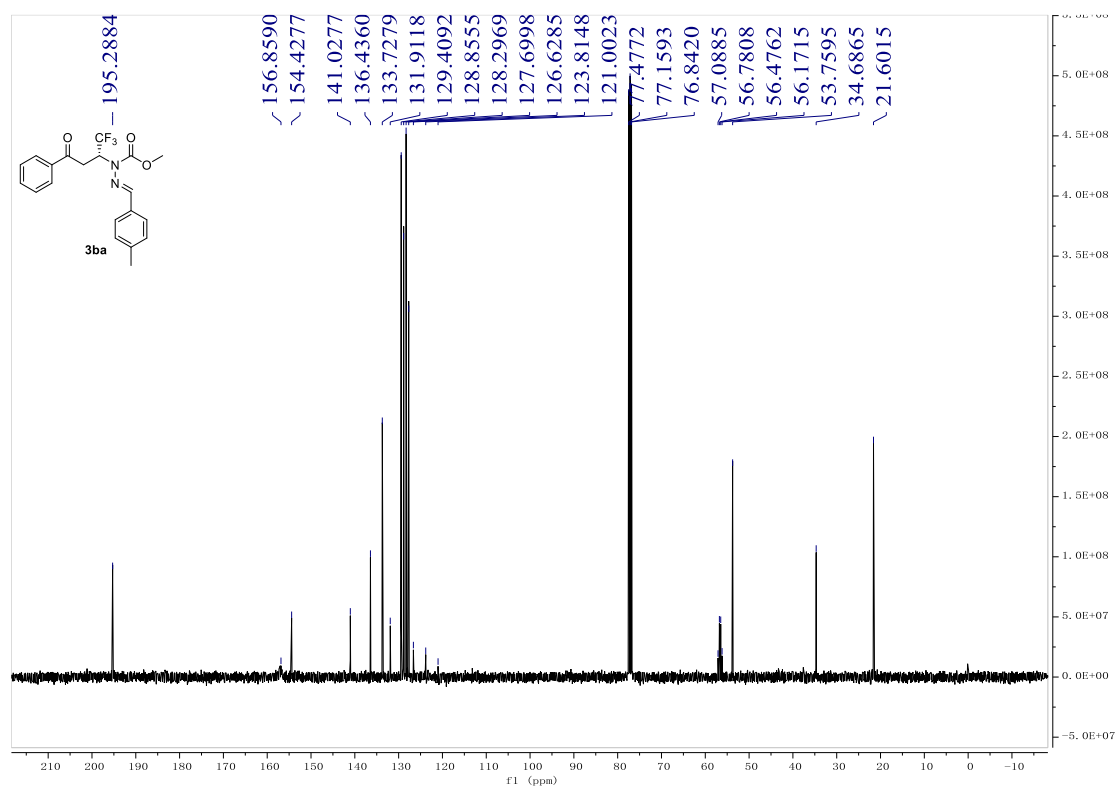

**<sup>19</sup>F{<sup>1</sup>H} NMR of 3ba (376 MHz, CDCl<sub>3</sub>)**

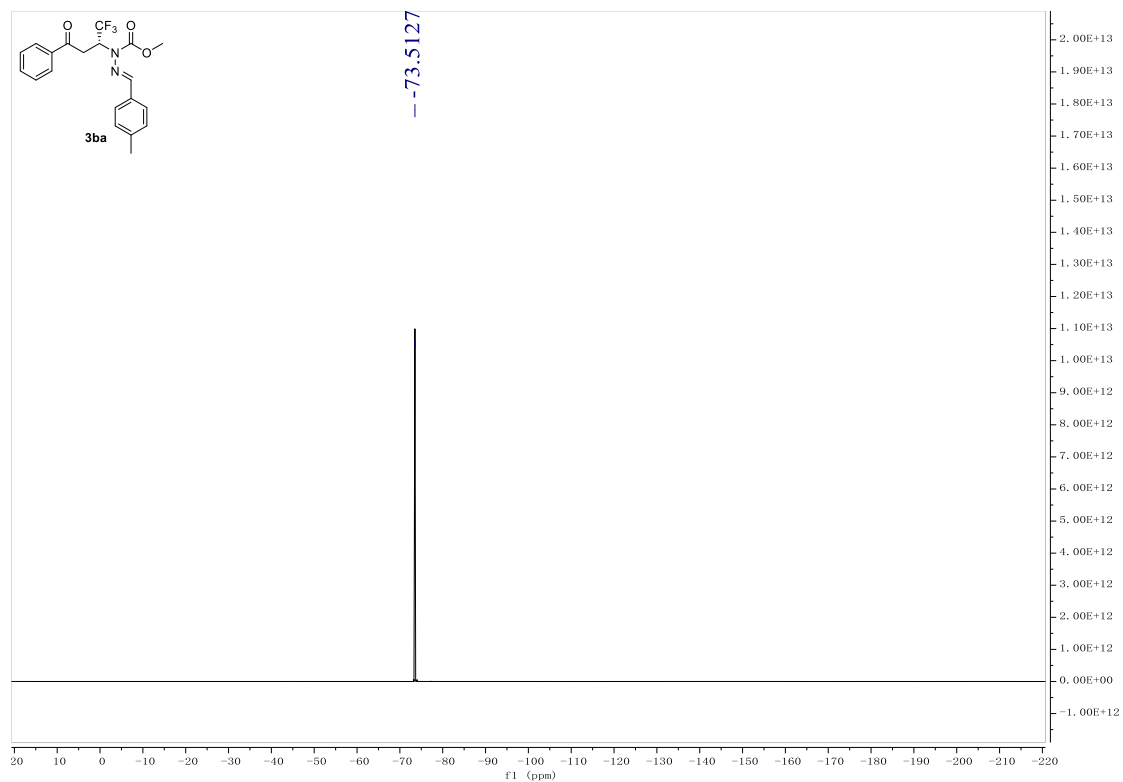

**$^1\text{H}$  NMR of 3ca (400 MHz,  $\text{CDCl}_3$ )**

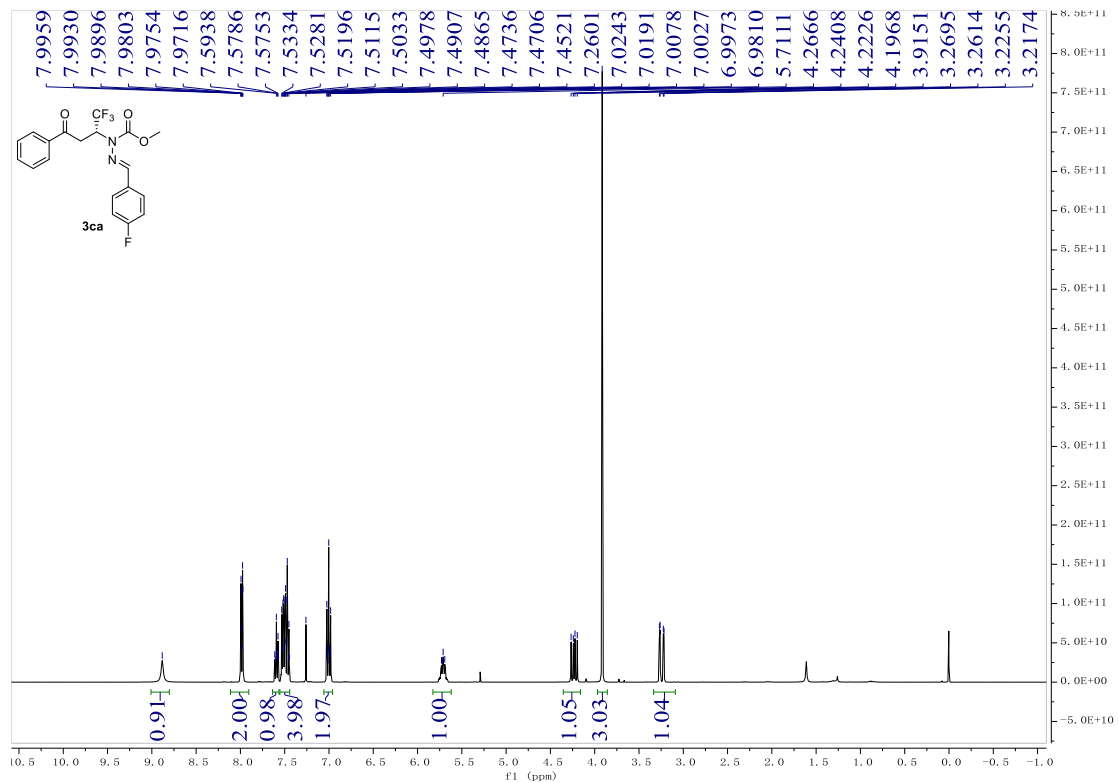

**$^{13}\text{C}\{^1\text{H}\}$  NMR of 3ca (100 MHz,  $\text{CDCl}_3$ )**

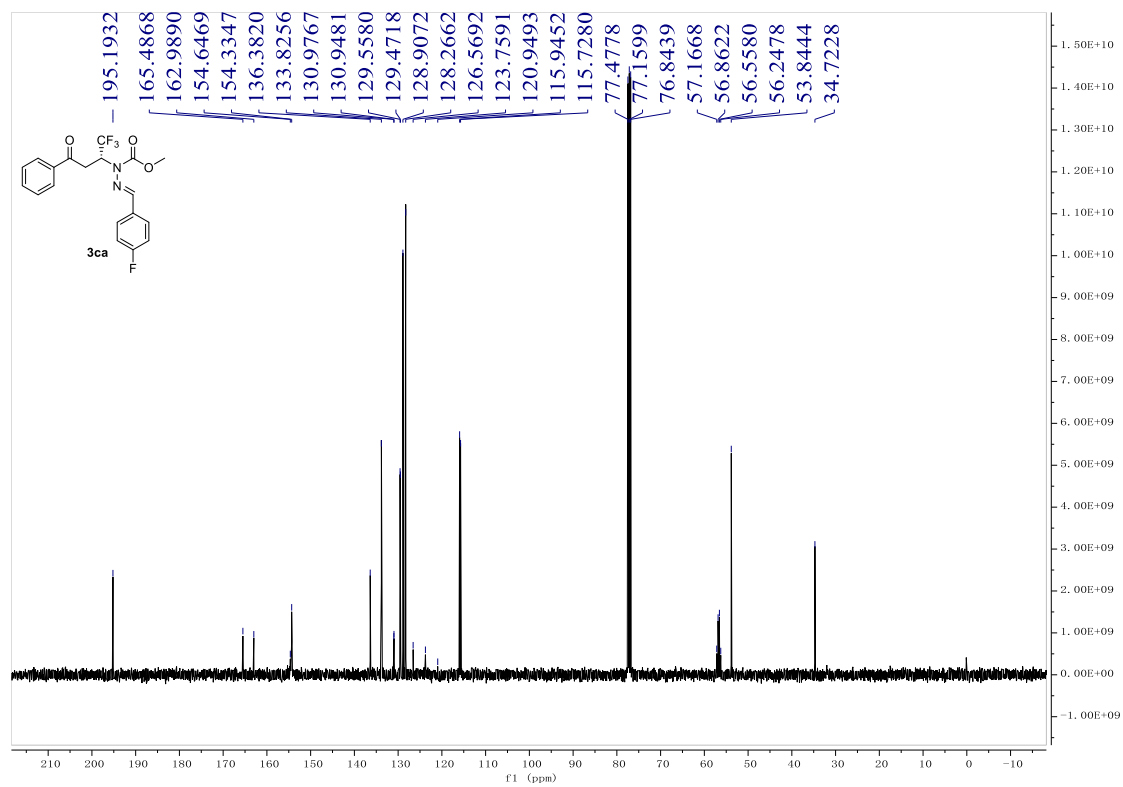

**<sup>19</sup>F{<sup>1</sup>H} NMR of 3ca (376 MHz, CDCl<sub>3</sub>)**

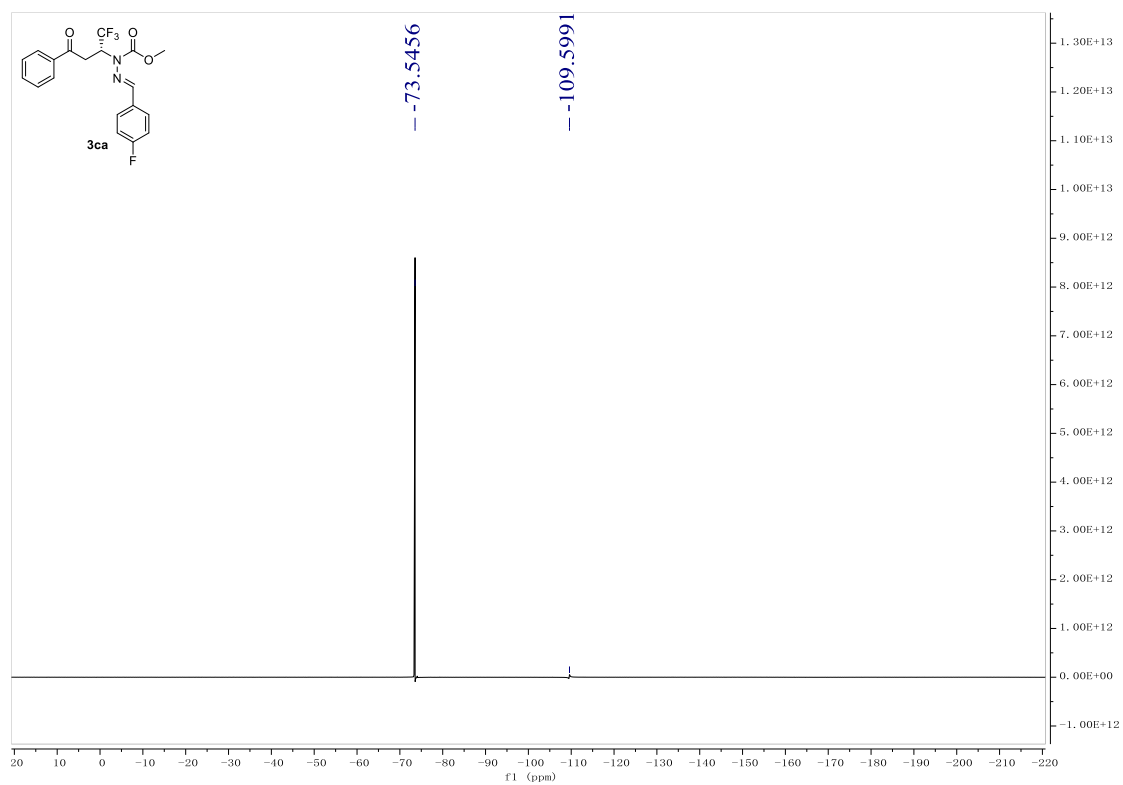

**<sup>1</sup>H NMR of 3da (600 MHz, CDCl<sub>3</sub>)**

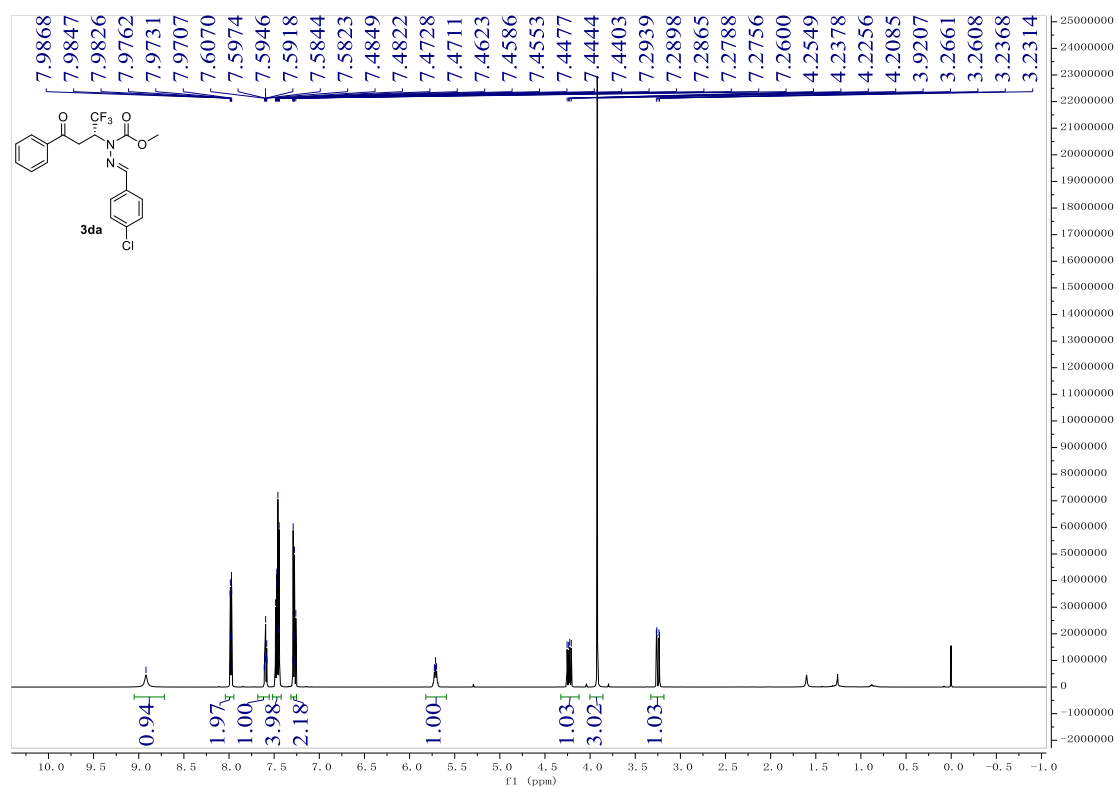

**<sup>13</sup>C{<sup>1</sup>H} NMR of 3da (150 MHz, CDCl<sub>3</sub>)**

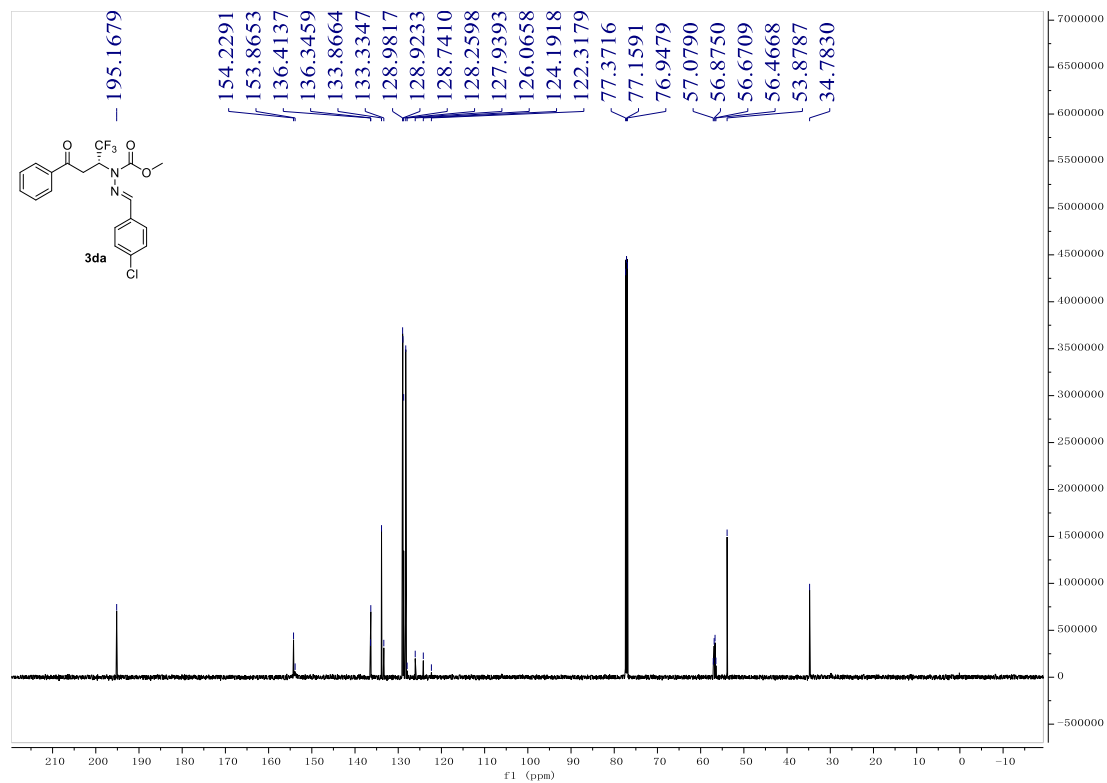

**<sup>19</sup>F{<sup>1</sup>H} NMR of 3da (565 MHz, CDCl<sub>3</sub>)**

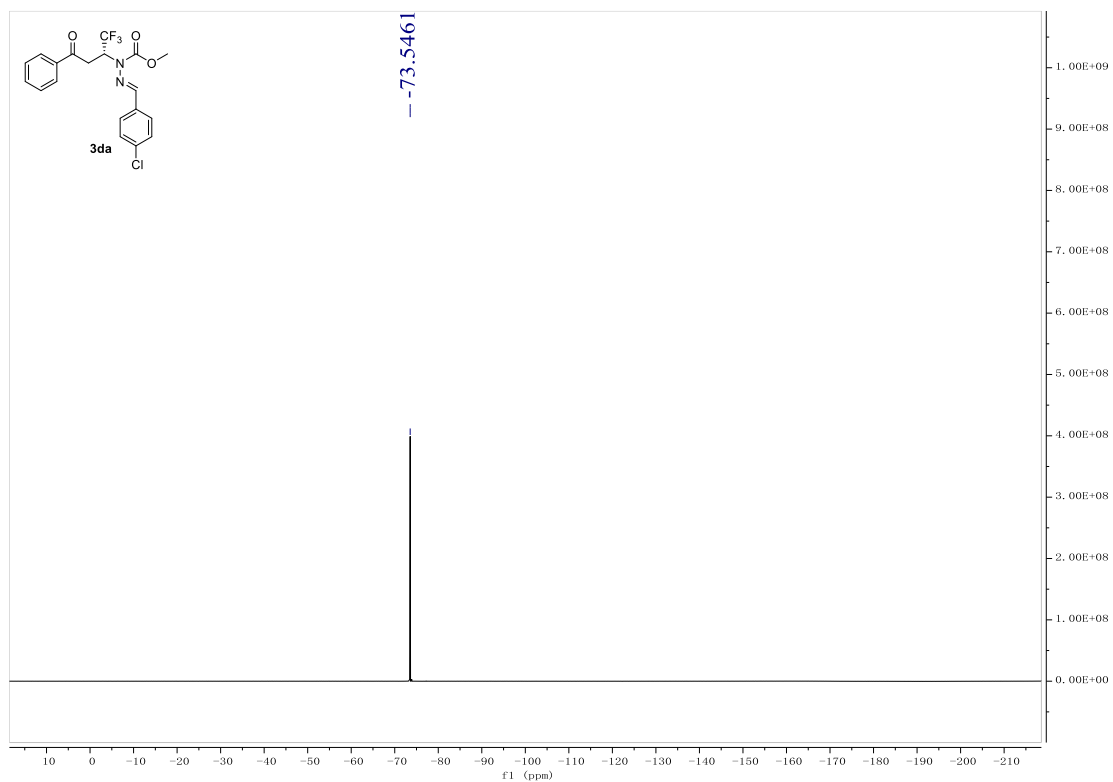

**$^1\text{H}$  NMR of 3ea (400 MHz,  $\text{CDCl}_3$ )**

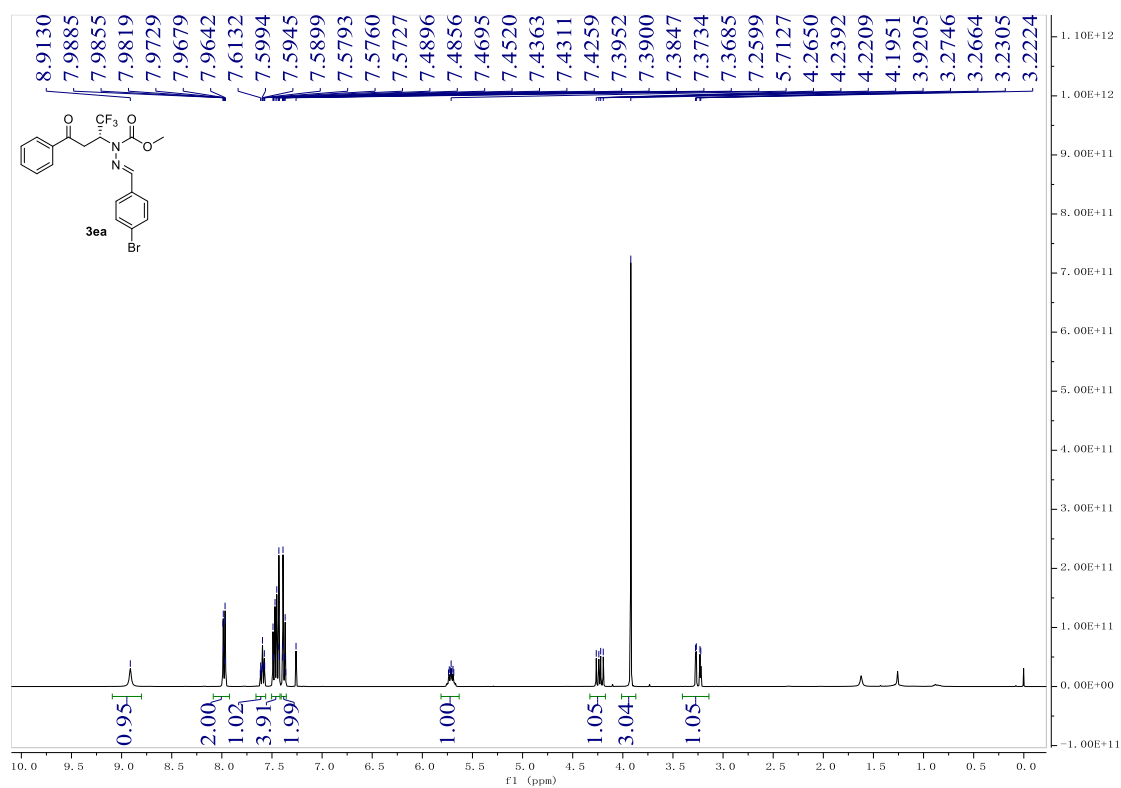

**$^{13}\text{C}\{^1\text{H}\}$  NMR of 3ea (100 MHz,  $\text{CDCl}_3$ )**

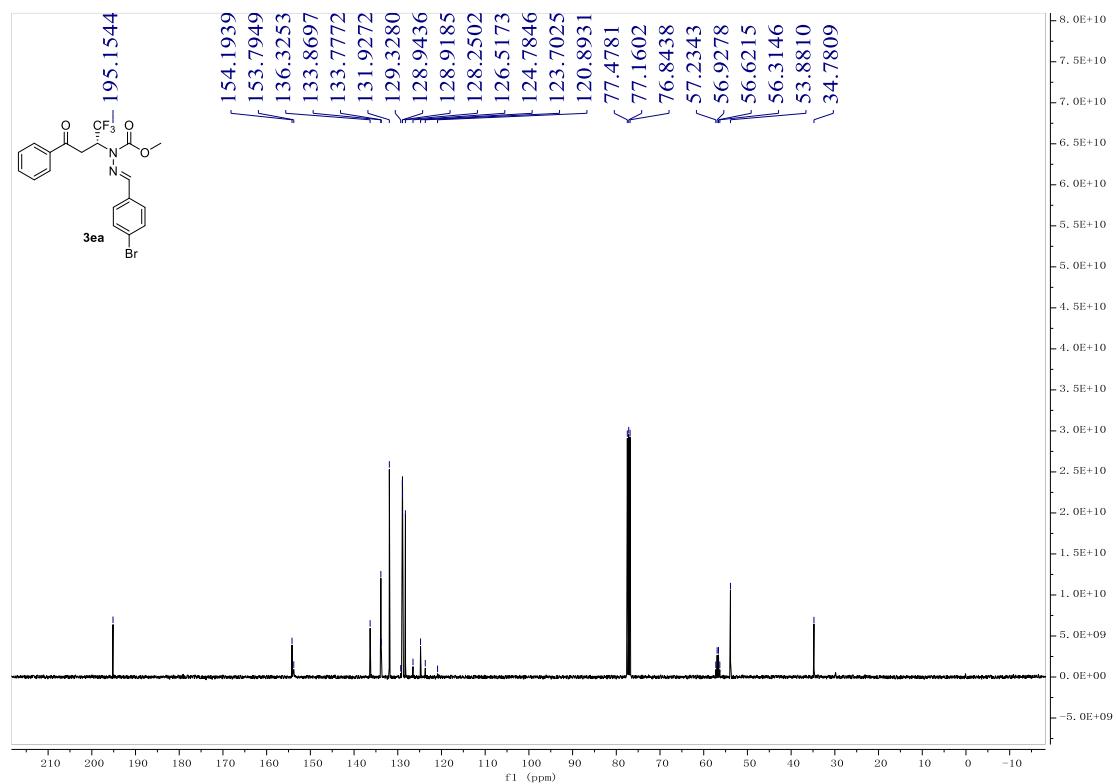

**$^{13}\text{C}\{^1\text{H}\}$  NMR of 3ea (376 MHz,  $\text{CDCl}_3$ )**

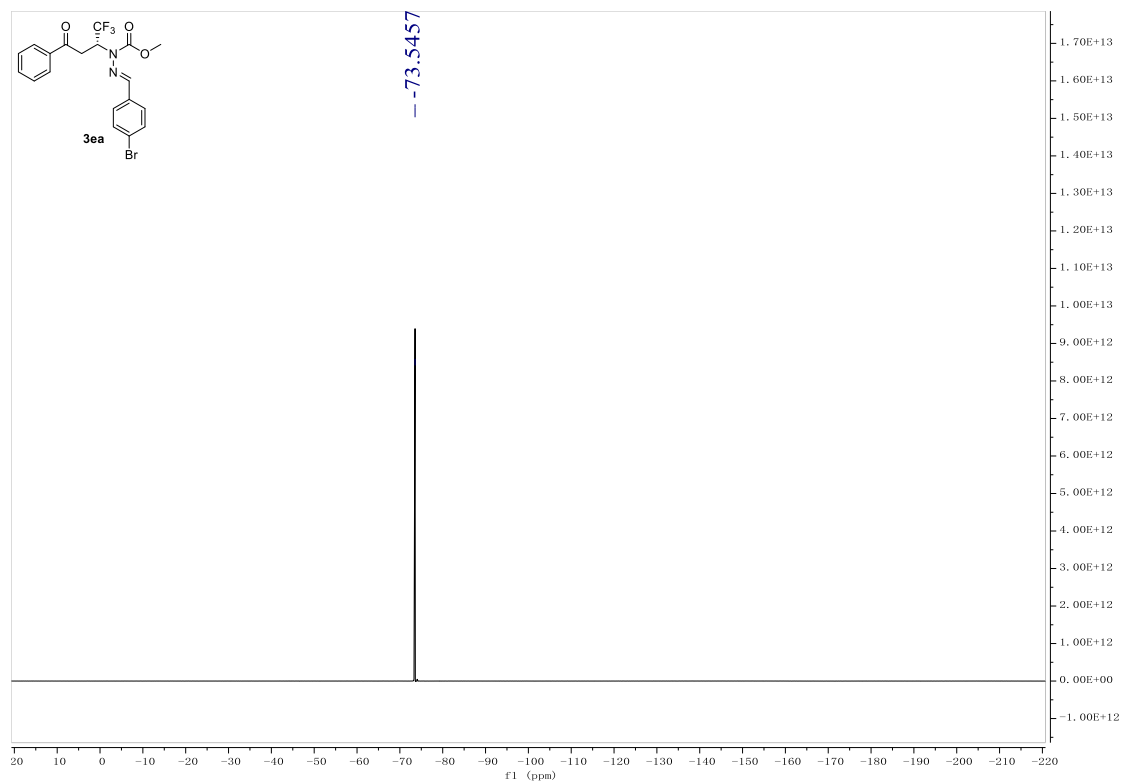

**$^1\text{H}$  NMR of 3fa (400 MHz,  $\text{CDCl}_3$ )**



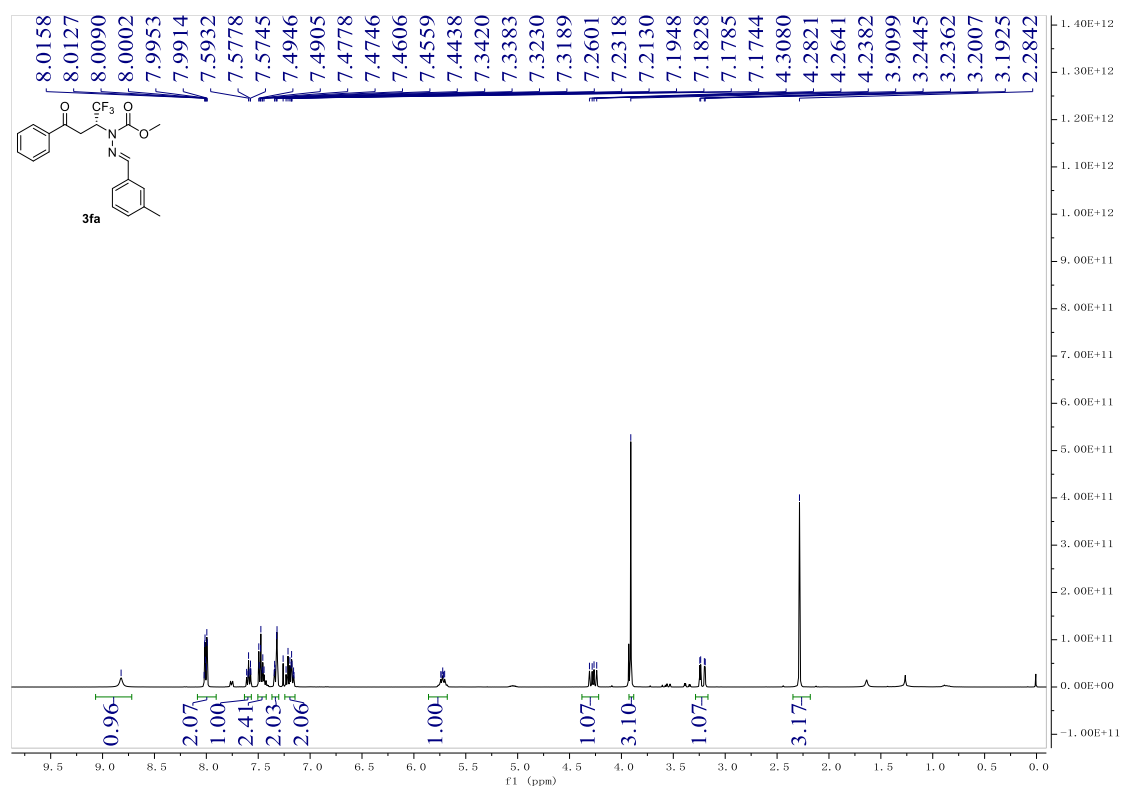

**<sup>13</sup>C{<sup>1</sup>H} NMR of 3fa (100 MHz, CDCl<sub>3</sub>)**

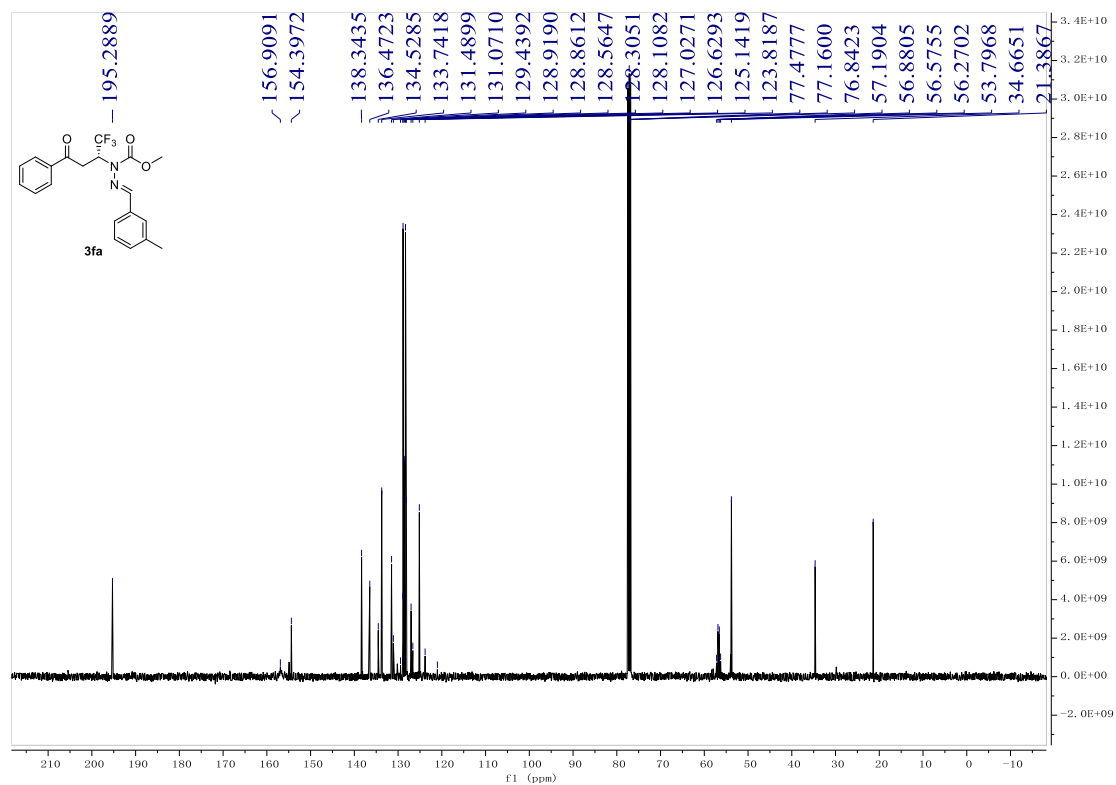

**<sup>19</sup>F{<sup>1</sup>H} NMR of 3fa (376 MHz, CDCl<sub>3</sub>)**

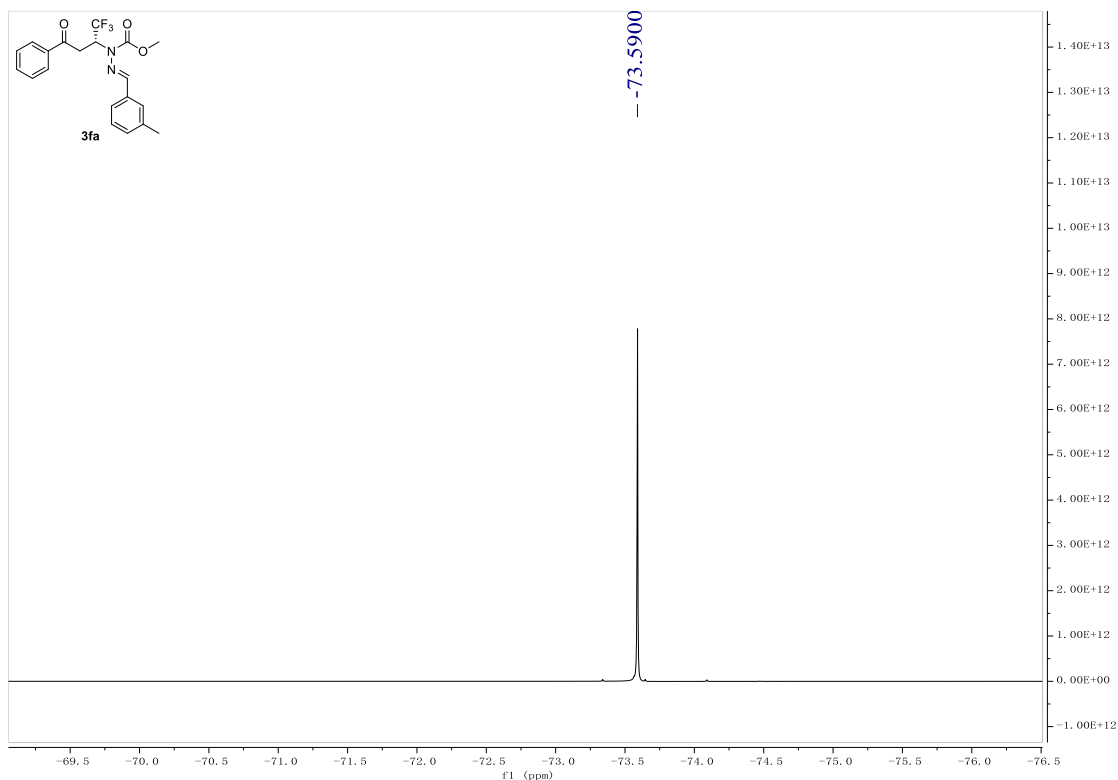

**$^1\text{H}$  NMR of 3ga (400 MHz,  $\text{CDCl}_3$ )**

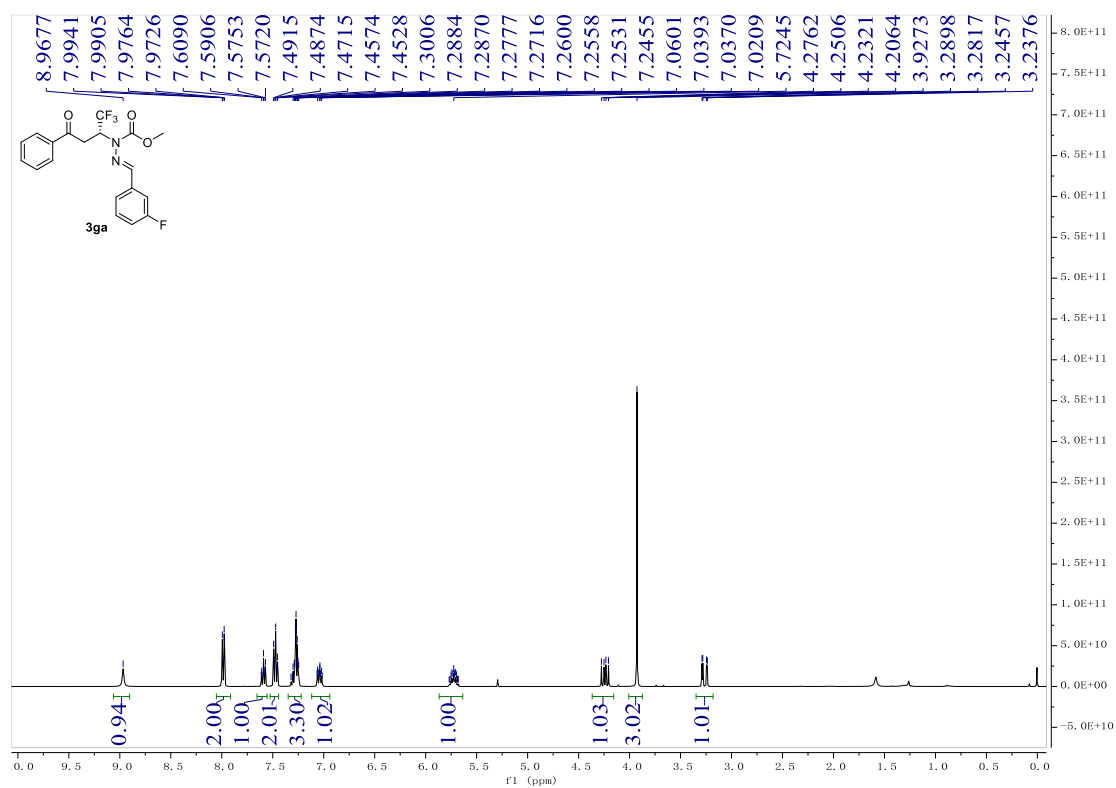

**$^{13}\text{C}\{^1\text{H}\}$  NMR of 3ga (100 MHz,  $\text{CDCl}_3$ )**

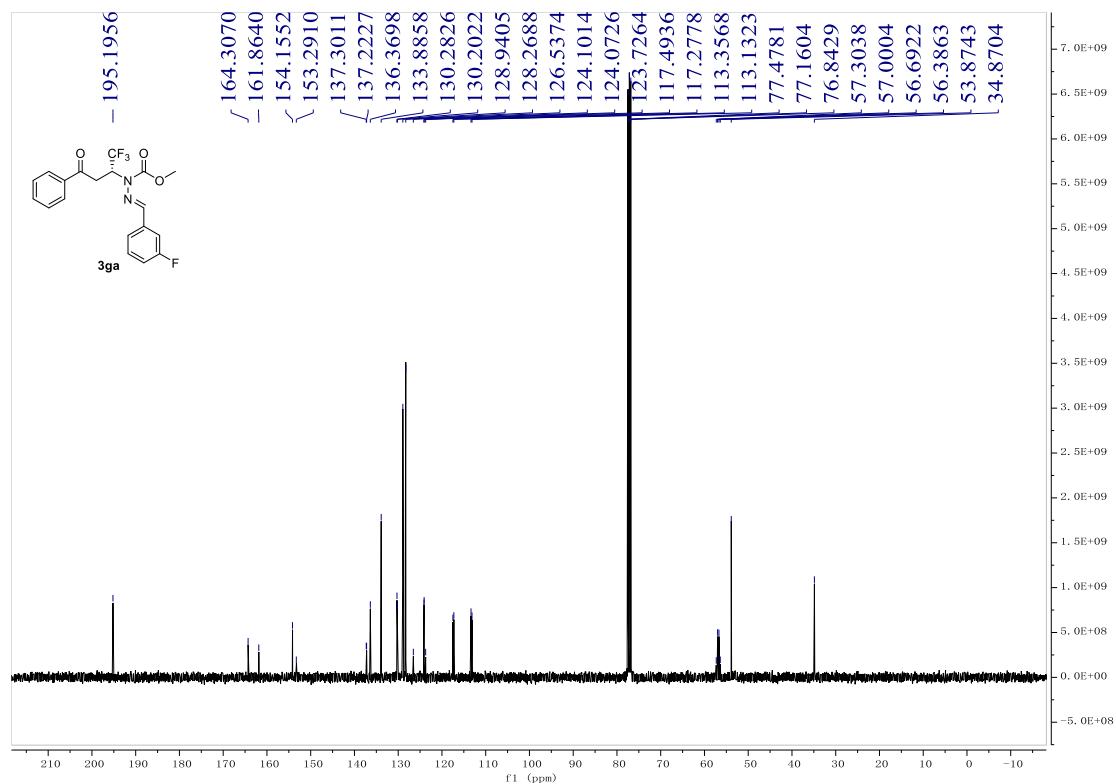

**$^{19}\text{F}\{^1\text{H}\}$  NMR of 3ga (376 MHz,  $\text{CDCl}_3$ )**

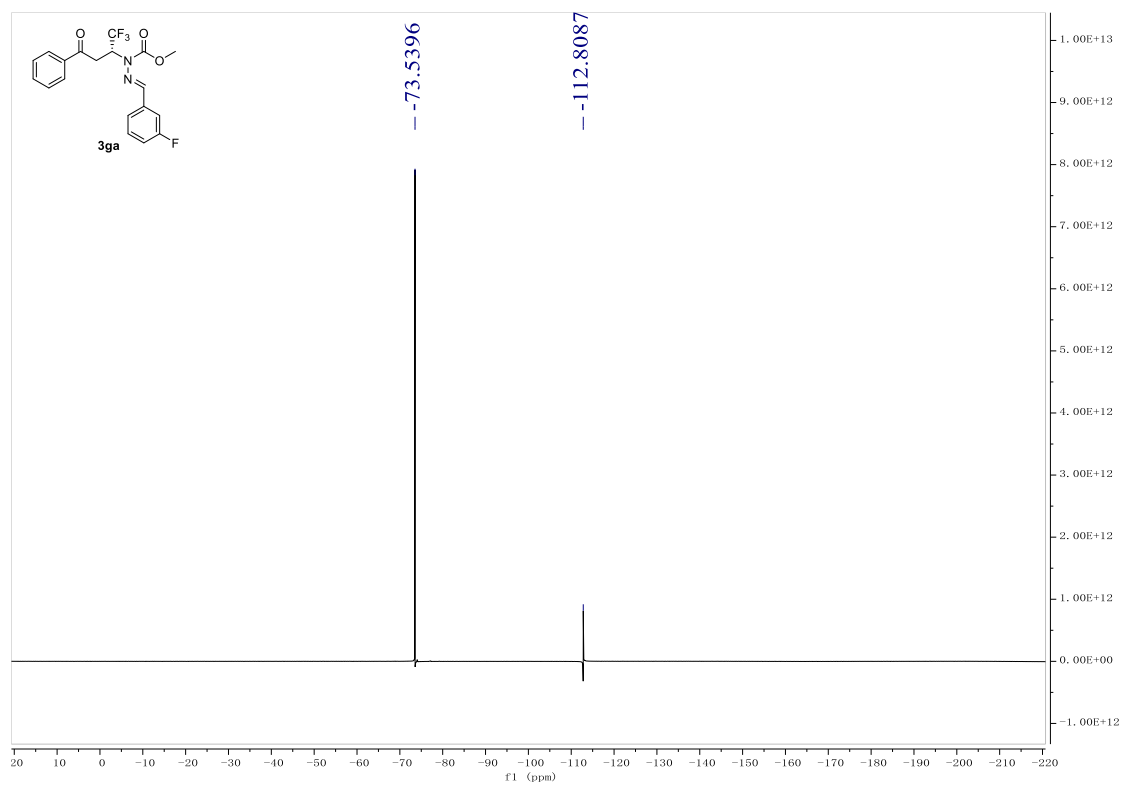

**$^1\text{H}$  NMR of 3ha (400 MHz,  $\text{CDCl}_3$ )**

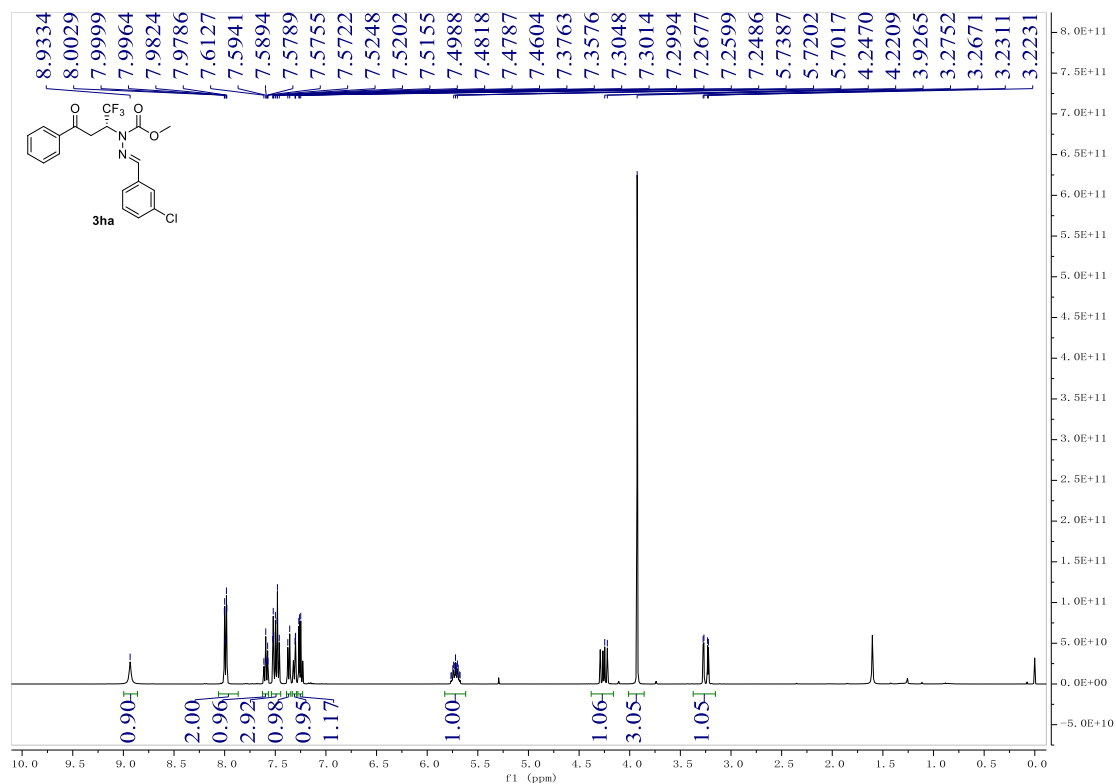

**<sup>13</sup>C{<sup>1</sup>H} NMR of 3ha (100 MHz, CDCl<sub>3</sub>)**

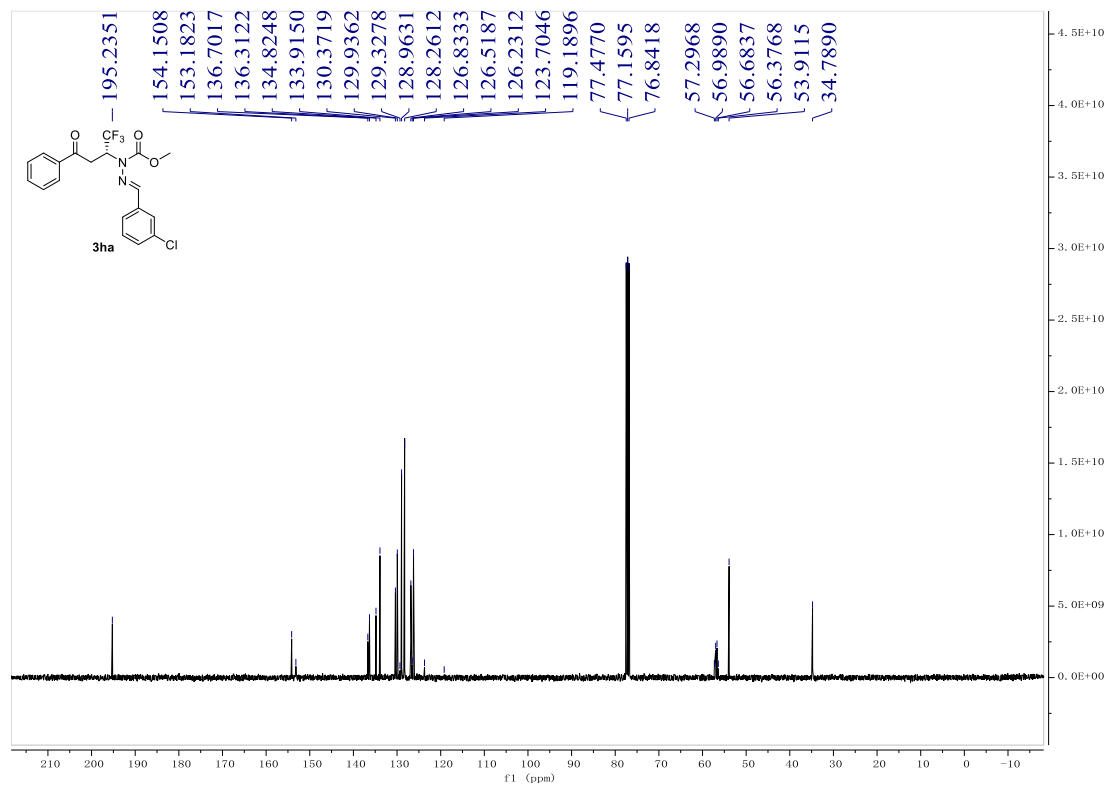

**<sup>19</sup>F{<sup>1</sup>H} NMR of 3ha (376 MHz, CDCl<sub>3</sub>)**

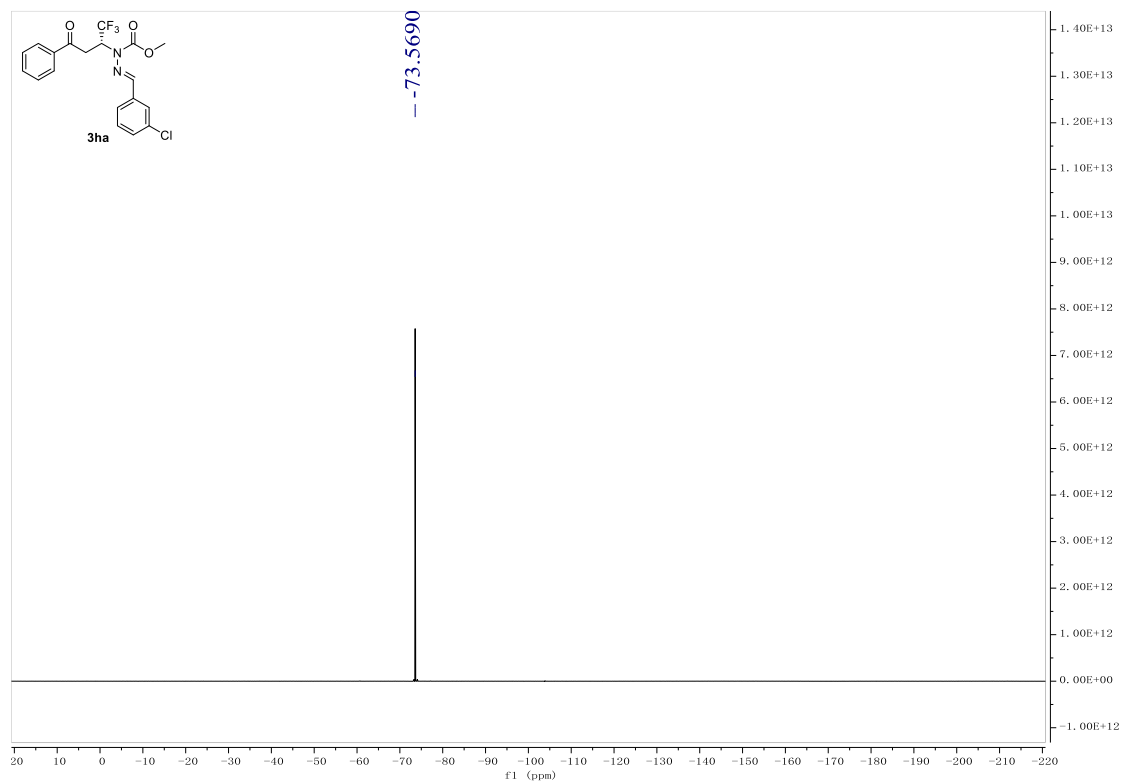

**$^1\text{H}$  NMR of 3ia (400 MHz,  $\text{CDCl}_3$ )**

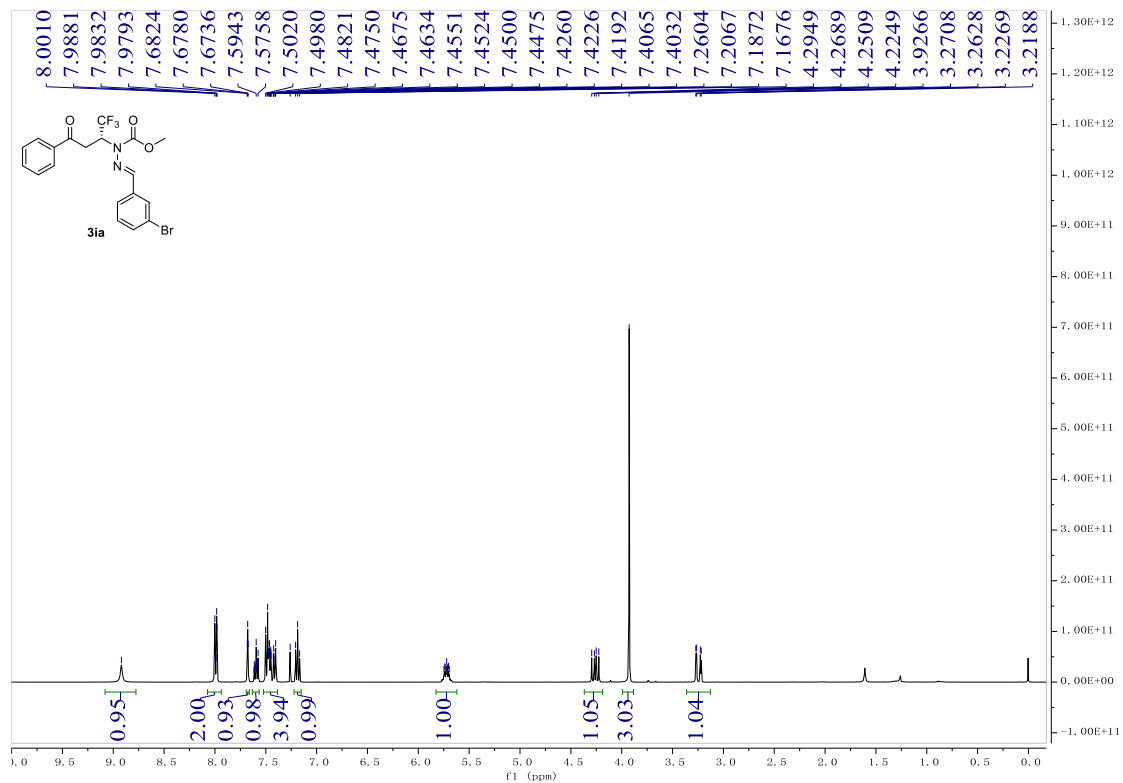

**$^{13}\text{C}\{^1\text{H}\}$  NMR of 3ia (100 MHz,  $\text{CDCl}_3$ )**

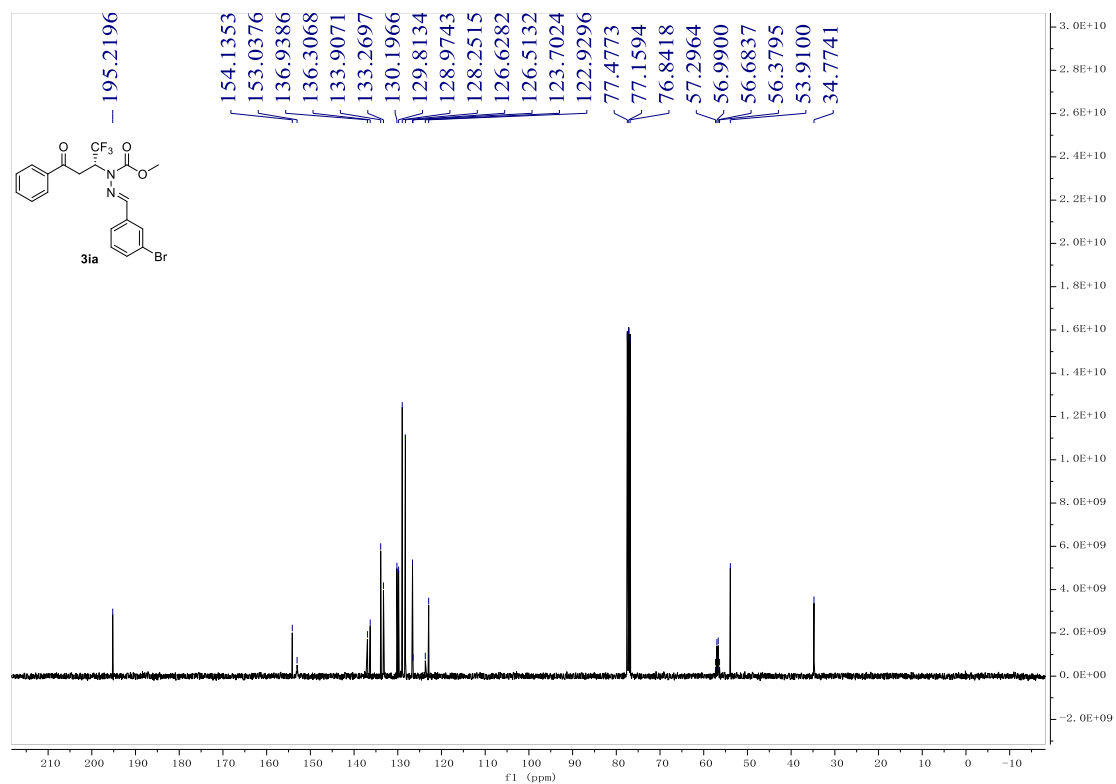

**<sup>19</sup>F{<sup>1</sup>H} NMR of 3ia (376 MHz, CDCl<sub>3</sub>)**

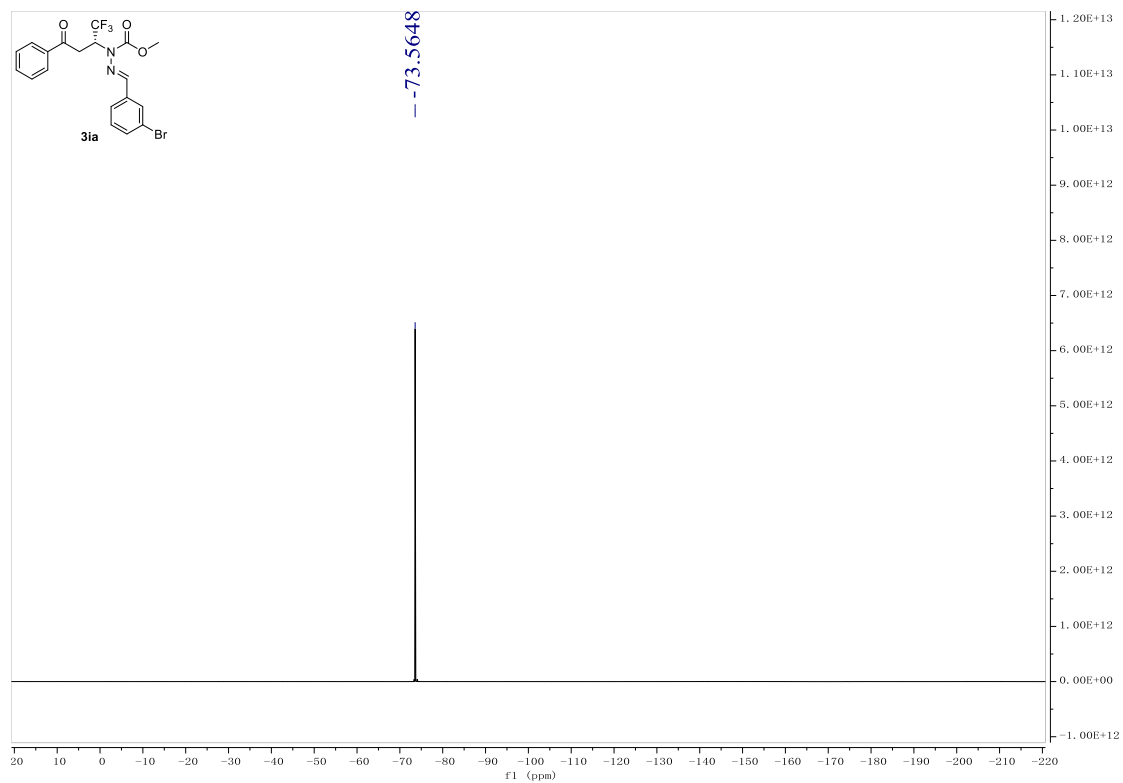

**<sup>1</sup>H NMR of 3ja (400 MHz, CDCl<sub>3</sub>)**

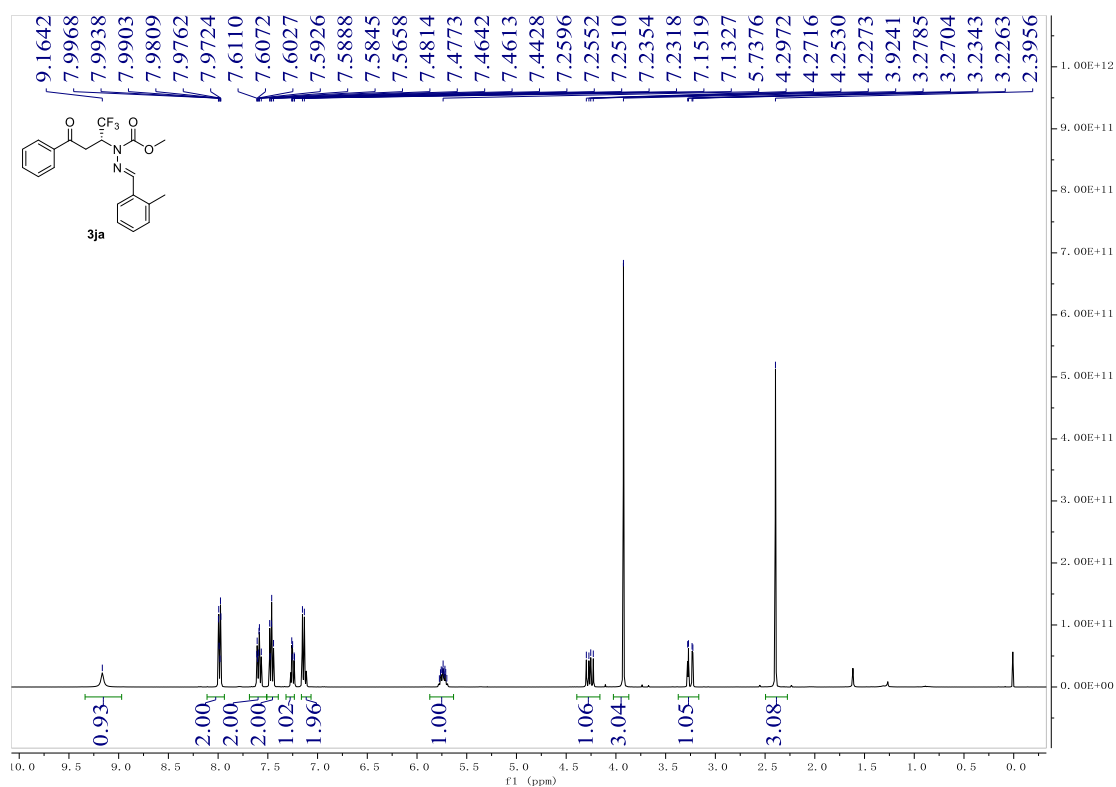

**<sup>13</sup>C{<sup>1</sup>H} NMR of 3ja (100 MHz, CDCl<sub>3</sub>)**

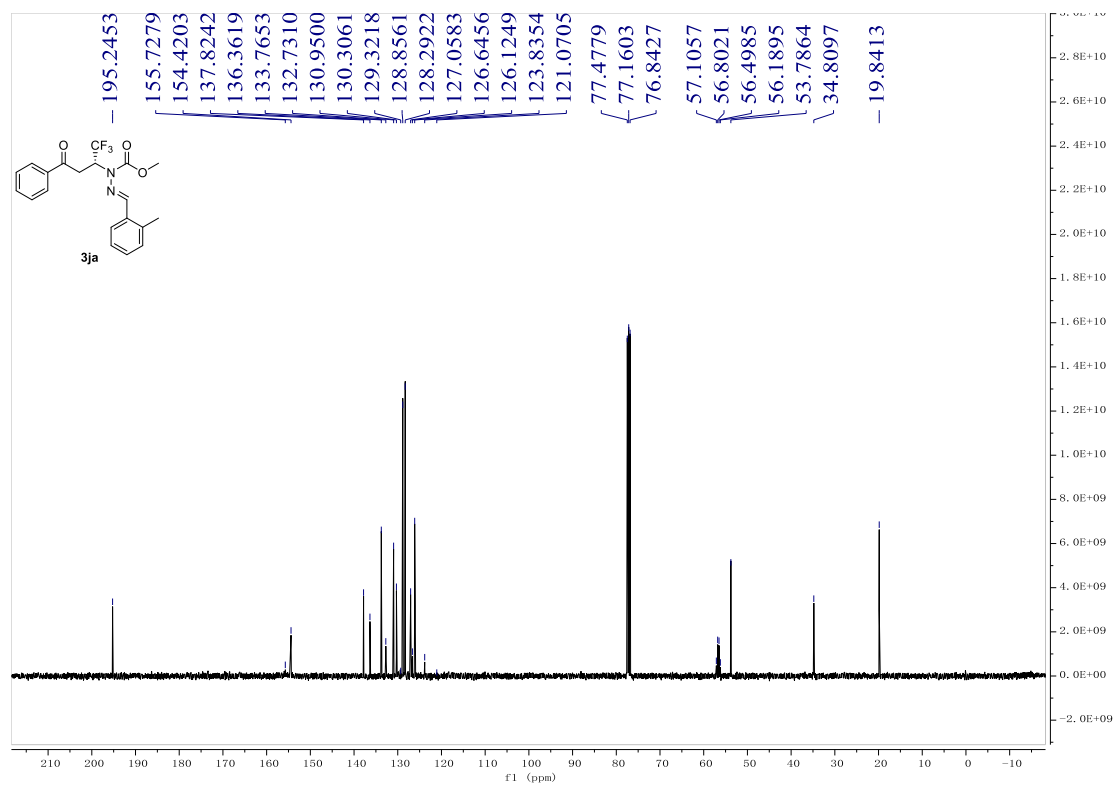

**<sup>19</sup>F{<sup>1</sup>H} NMR of 3ja (376 MHz, CDCl<sub>3</sub>)**

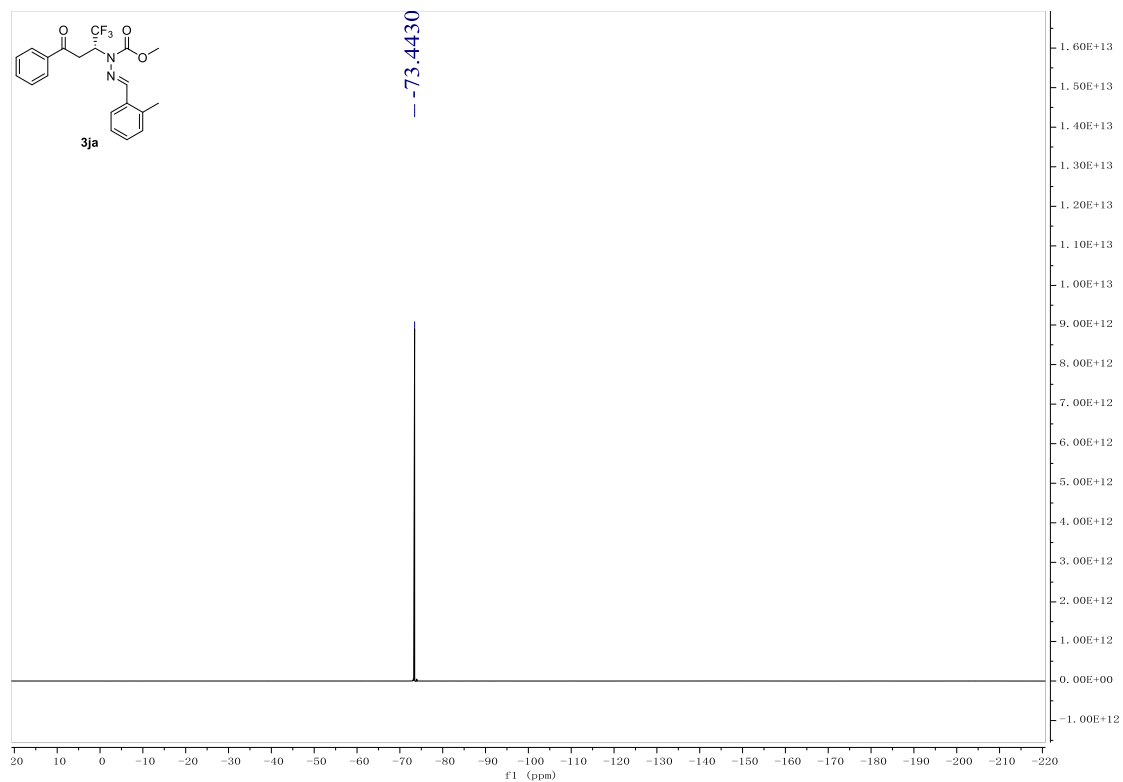

**$^1\text{H}$  NMR of 3ka (400 MHz,  $\text{CDCl}_3$ )**

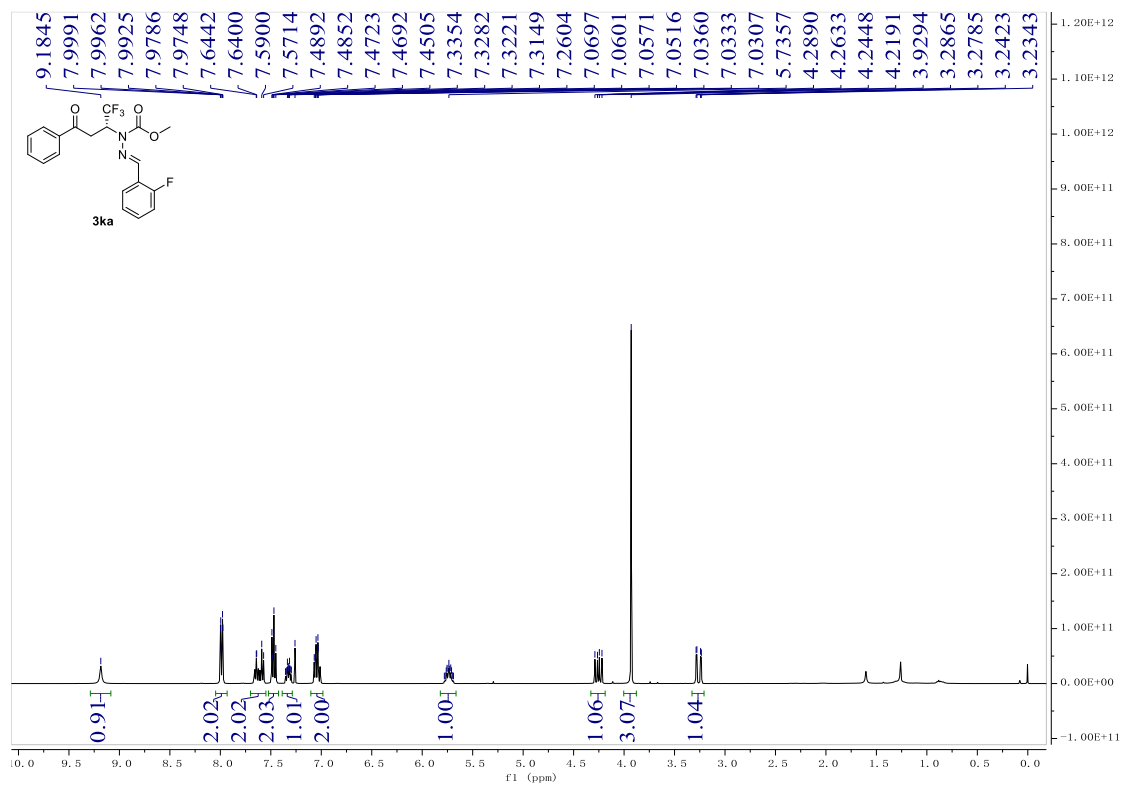

**$^{13}\text{C}\{^1\text{H}\}$  NMR of 3ka (100 MHz,  $\text{CDCl}_3$ )**



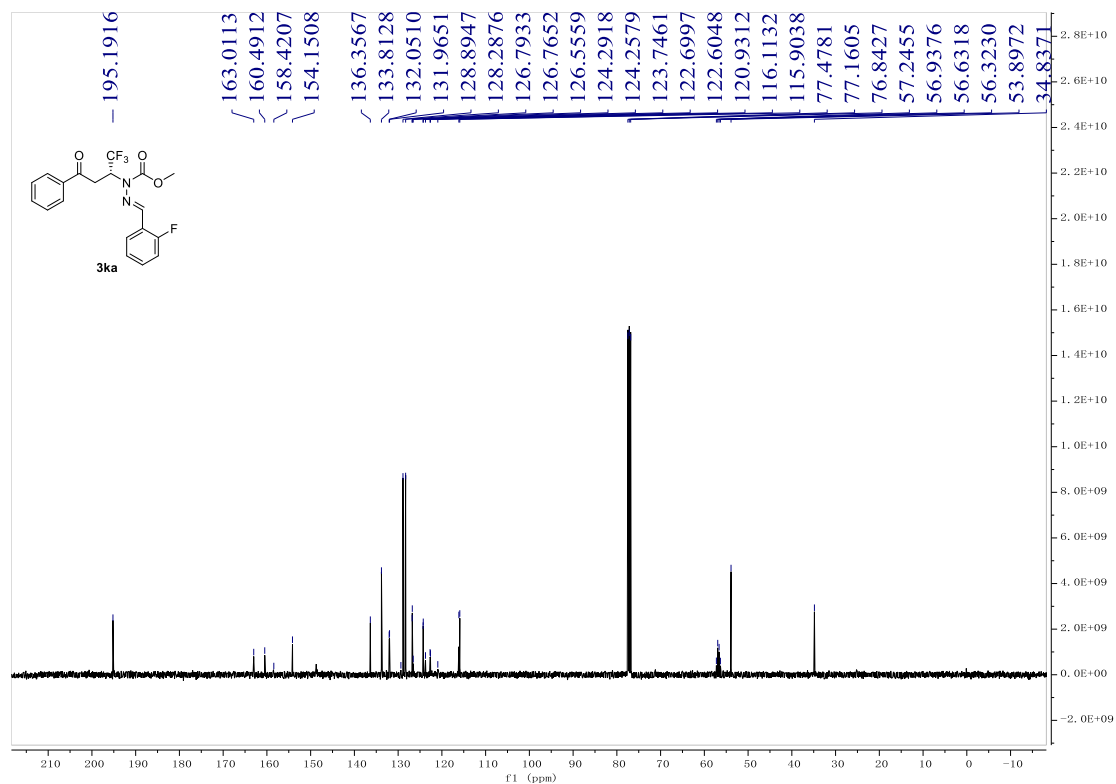

**<sup>19</sup>F{<sup>1</sup>H} NMR of 3ka (376 MHz, CDCl<sub>3</sub>)**

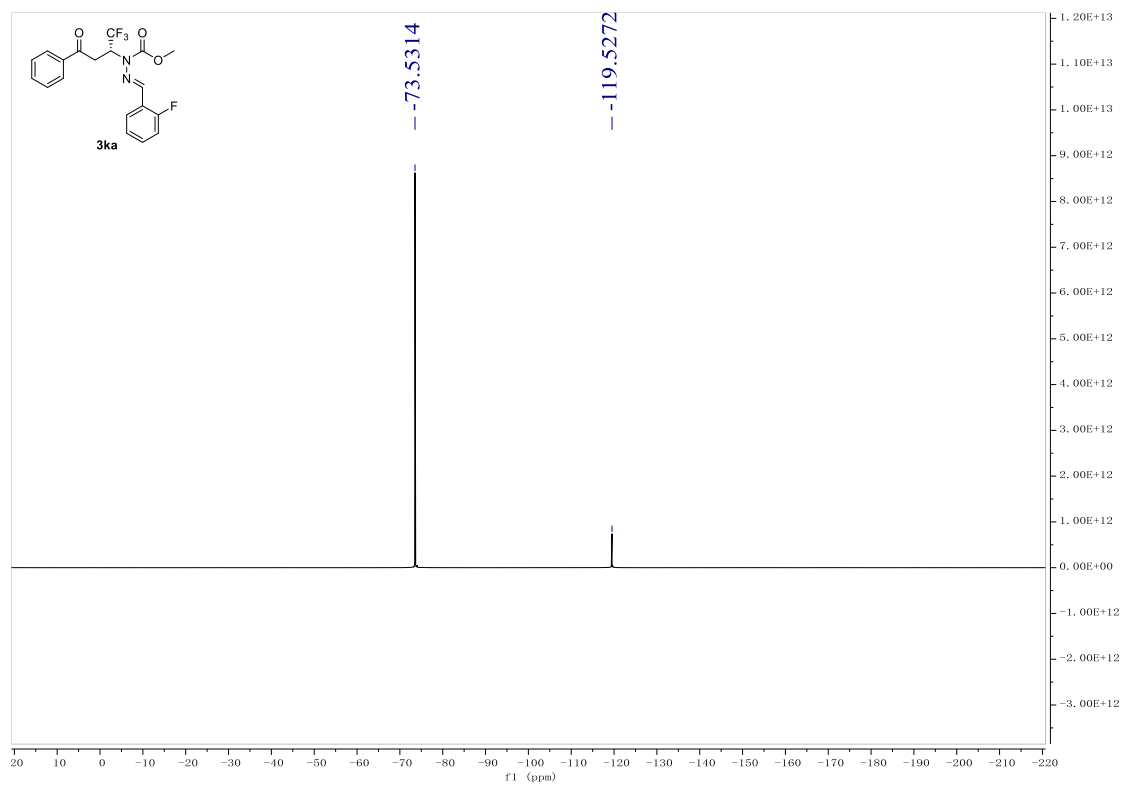

**<sup>1</sup>H NMR of 3la (400 MHz, CDCl<sub>3</sub>)**

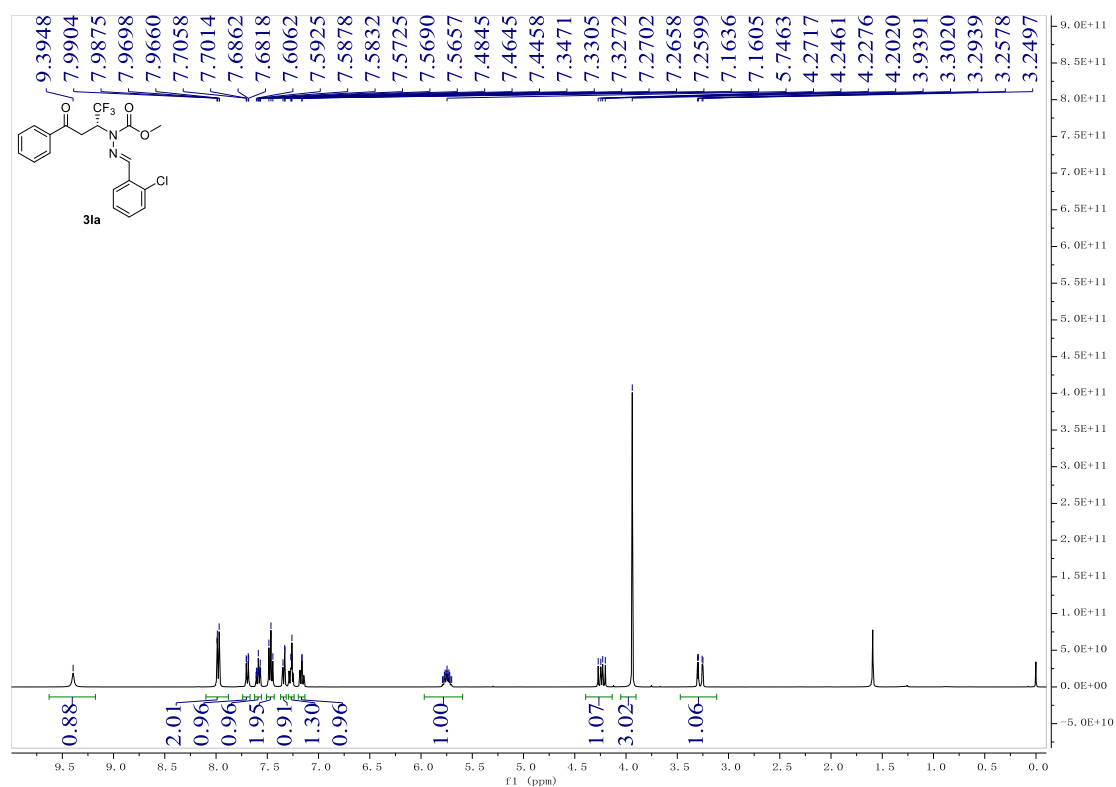

**<sup>13</sup>C{<sup>1</sup>H} NMR of 3la (100 MHz, CDCl<sub>3</sub>)**

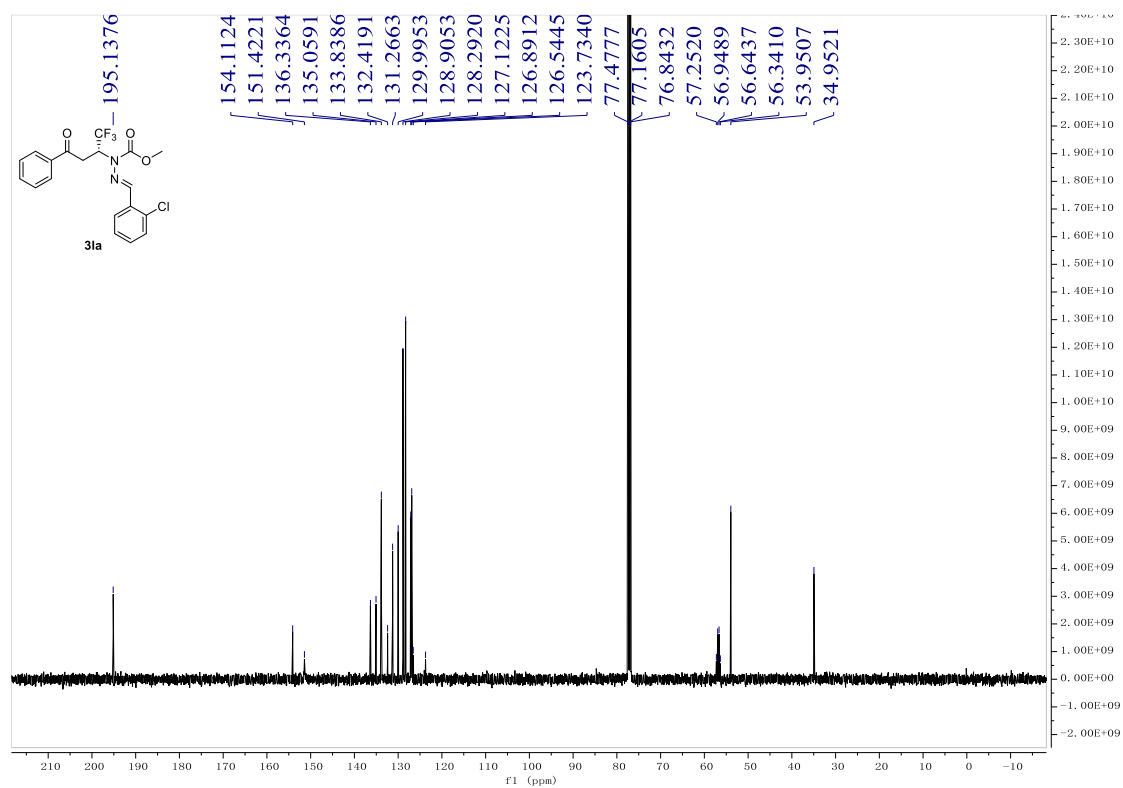

**<sup>19</sup>F{<sup>1</sup>H} NMR of 3la (376 MHz, CDCl<sub>3</sub>)**

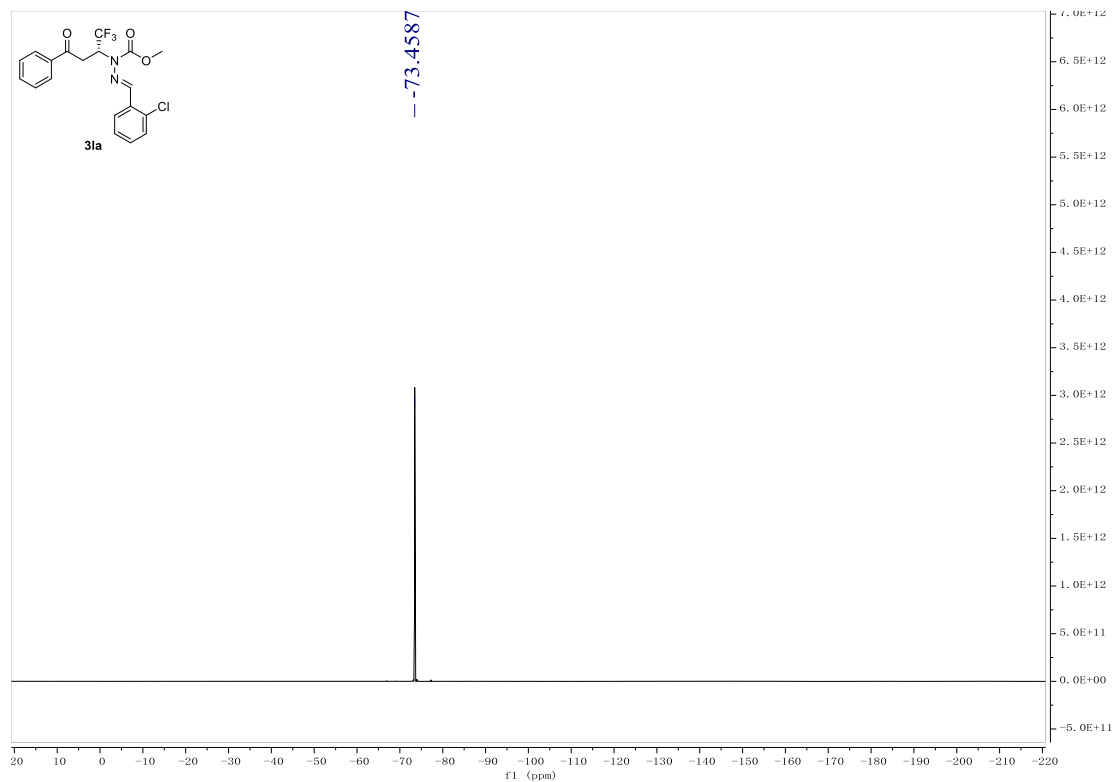

**$^1\text{H}$  NMR of 3ma (400 MHz,  $\text{CDCl}_3$ )**

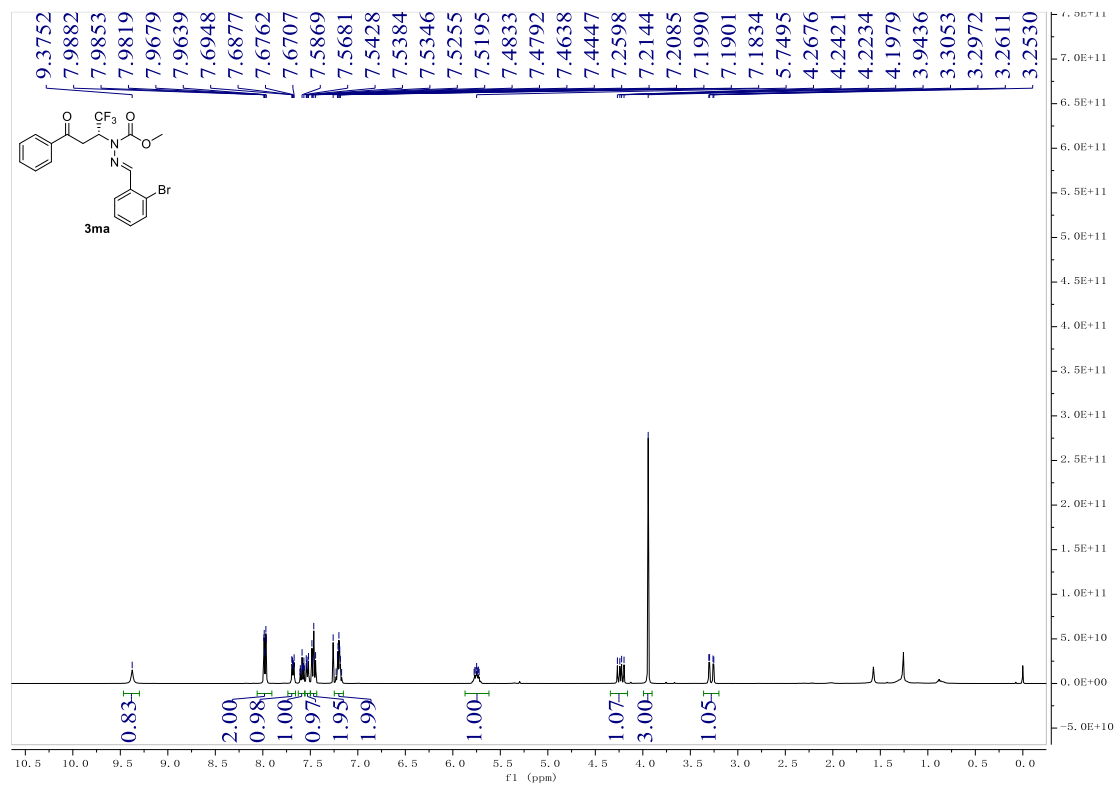

**$^{13}\text{C}\{^1\text{H}\}$  NMR of 3ma (100 MHz,  $\text{CDCl}_3$ )**

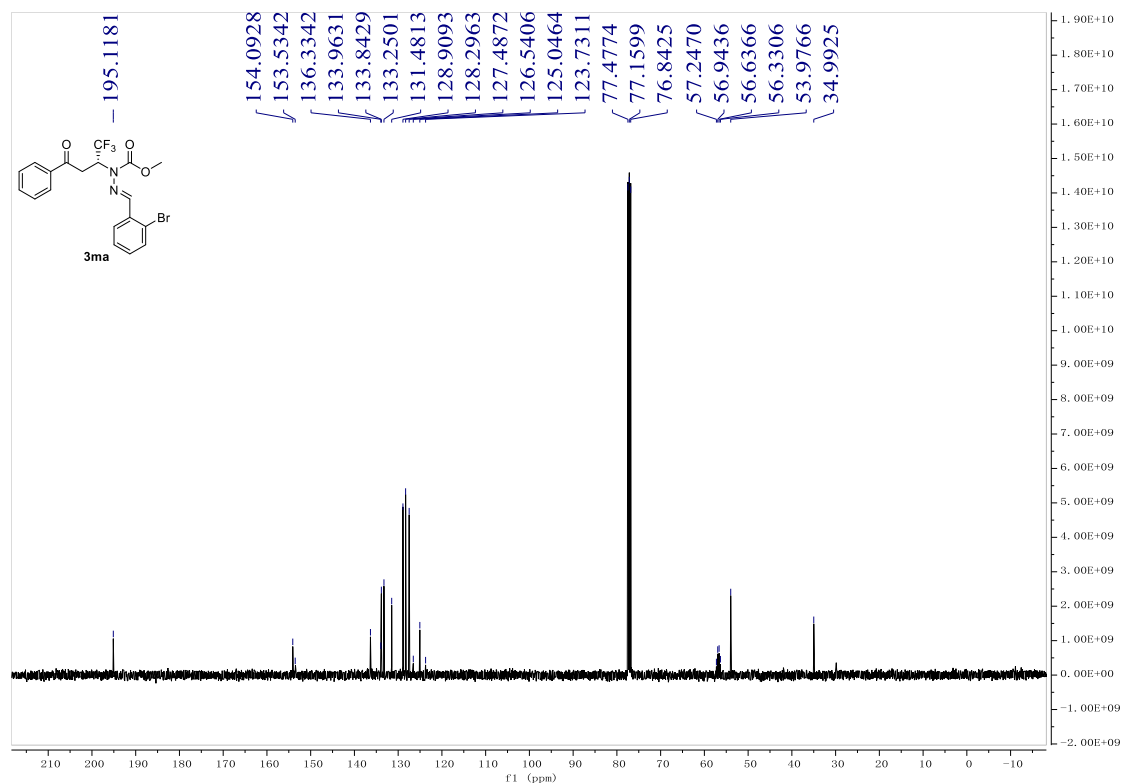

**$^{19}\text{F}\{^1\text{H}\}$  NMR of 3ma (376 MHz,  $\text{CDCl}_3$ )**

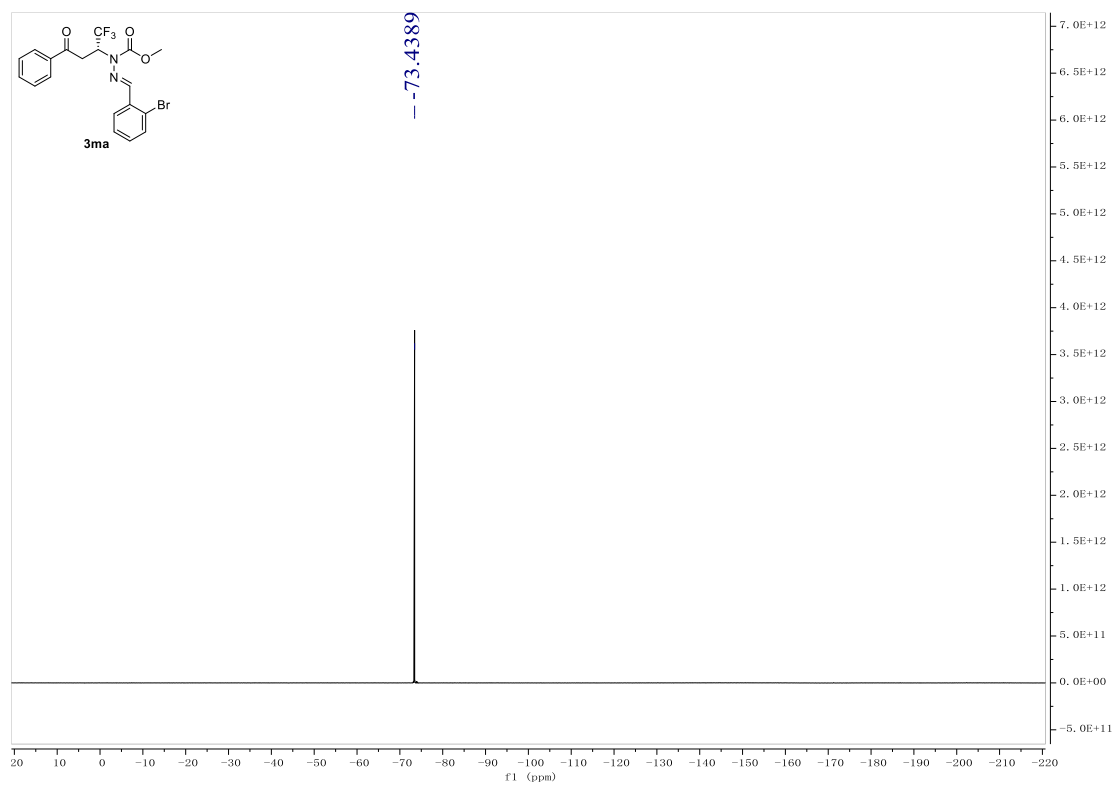

**$^1\text{H}$  NMR of 3na (600 MHz,  $\text{CDCl}_3$ )**

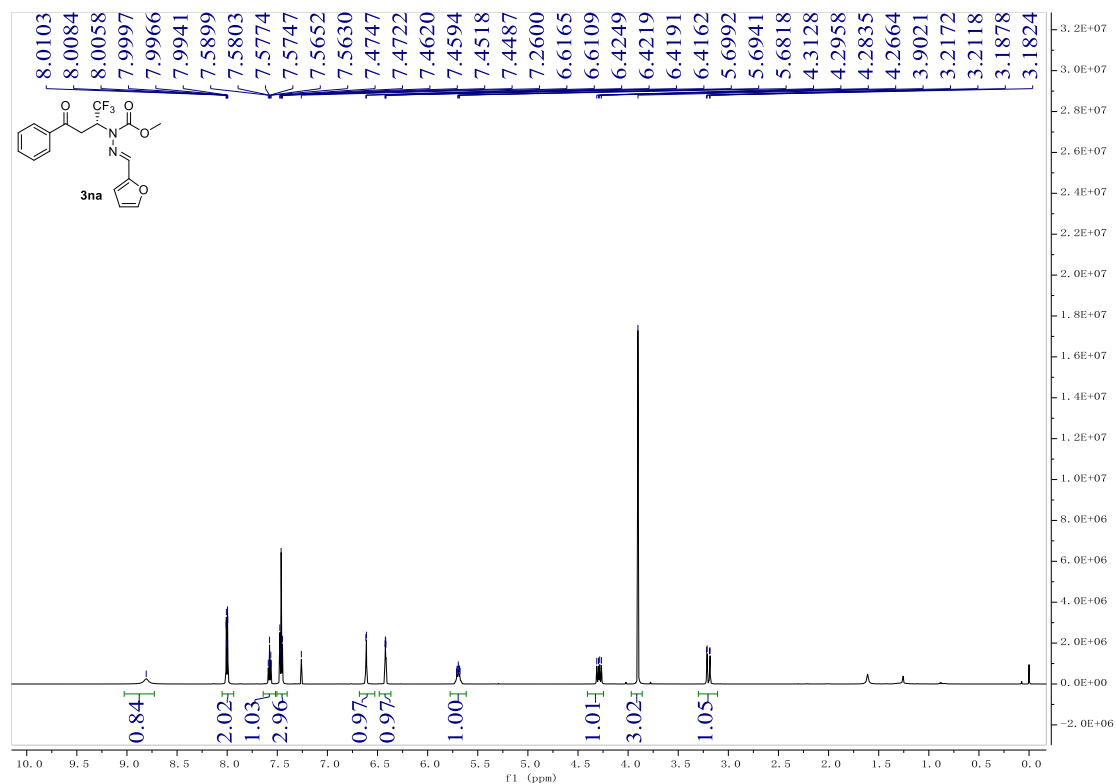

**<sup>13</sup>C{<sup>1</sup>H} NMR of 3na (150 MHz, CDCl<sub>3</sub>)**

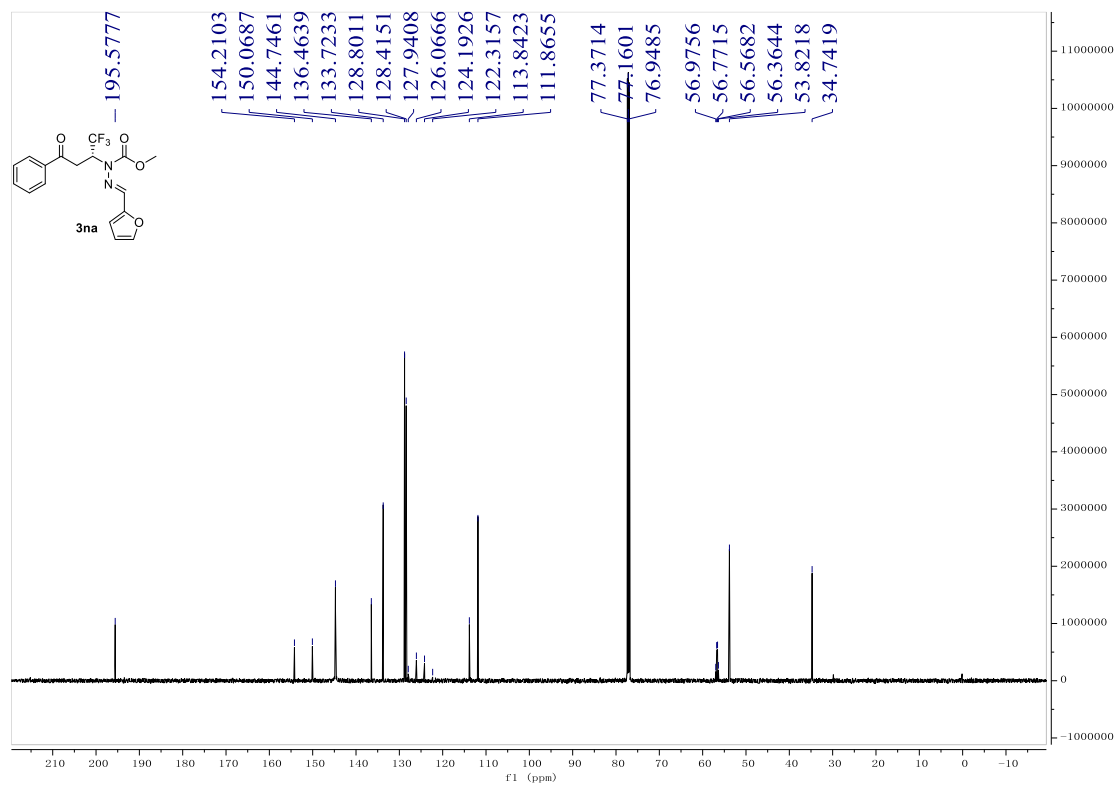

**<sup>19</sup>F{<sup>1</sup>H} NMR of 3na (565 MHz, CDCl<sub>3</sub>)**

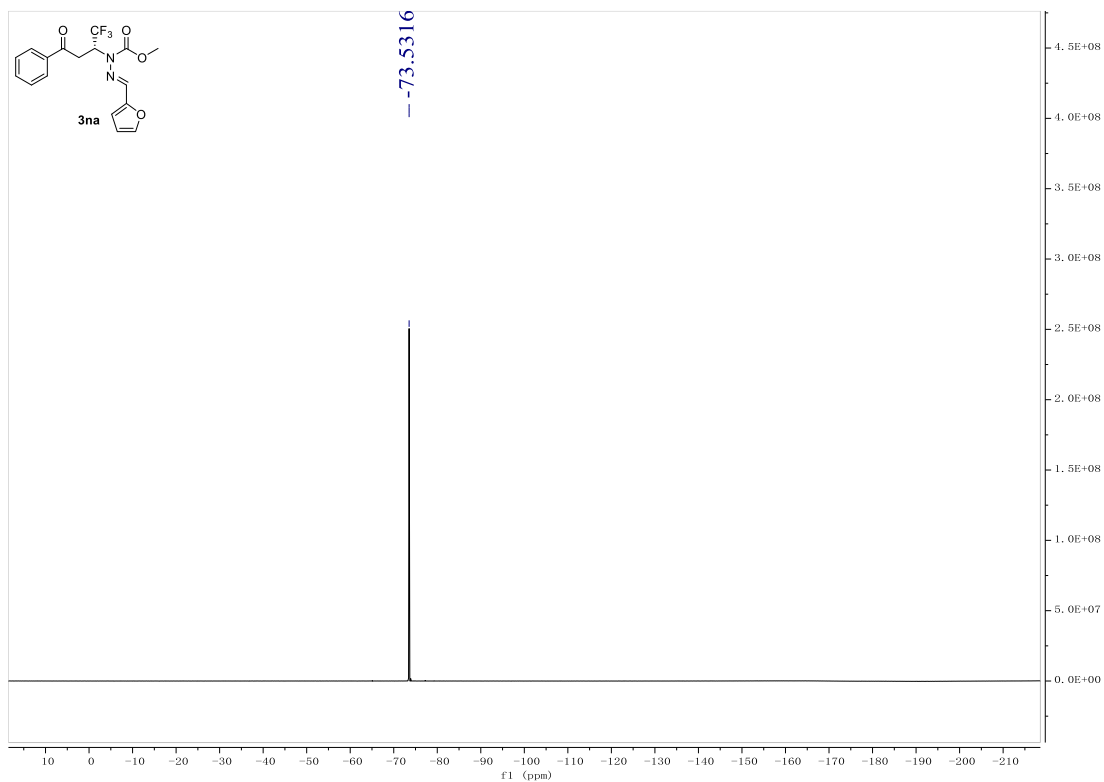

**$^1\text{H}$  NMR of 3oa (400 MHz,  $\text{CDCl}_3$ )**

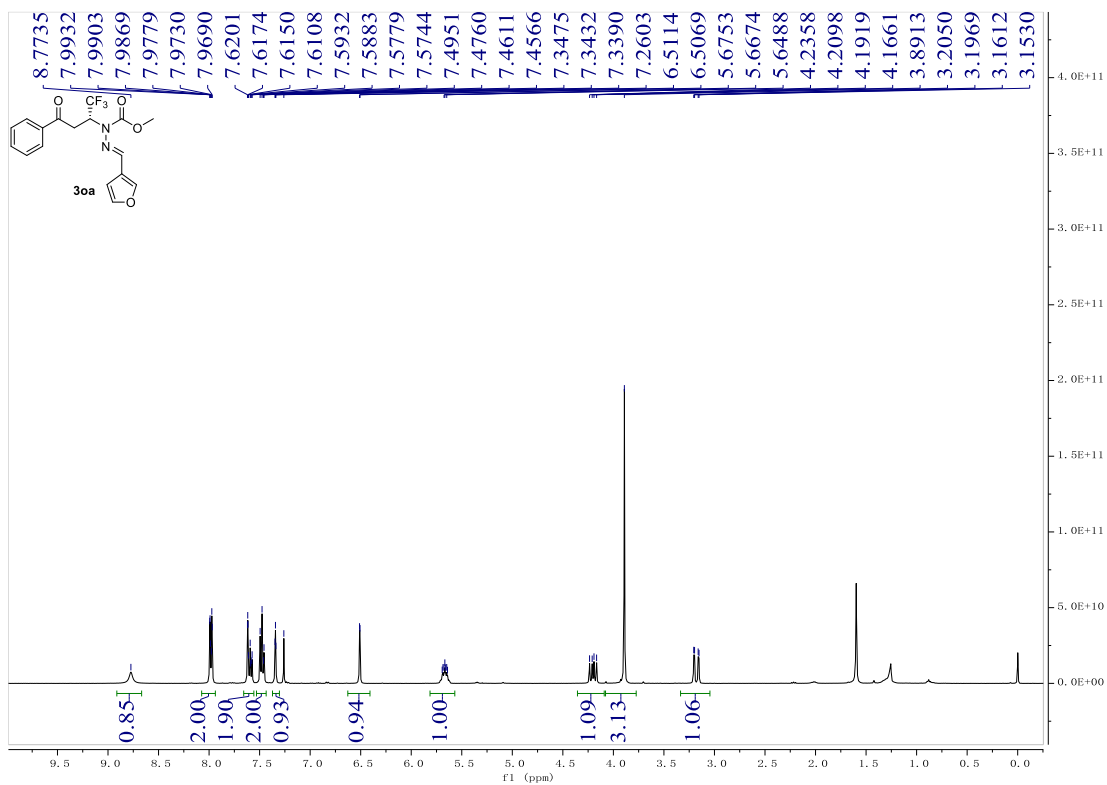

**$^{13}\text{C}\{^1\text{H}\}$  NMR of 3oa (100 MHz,  $\text{CDCl}_3$ )**

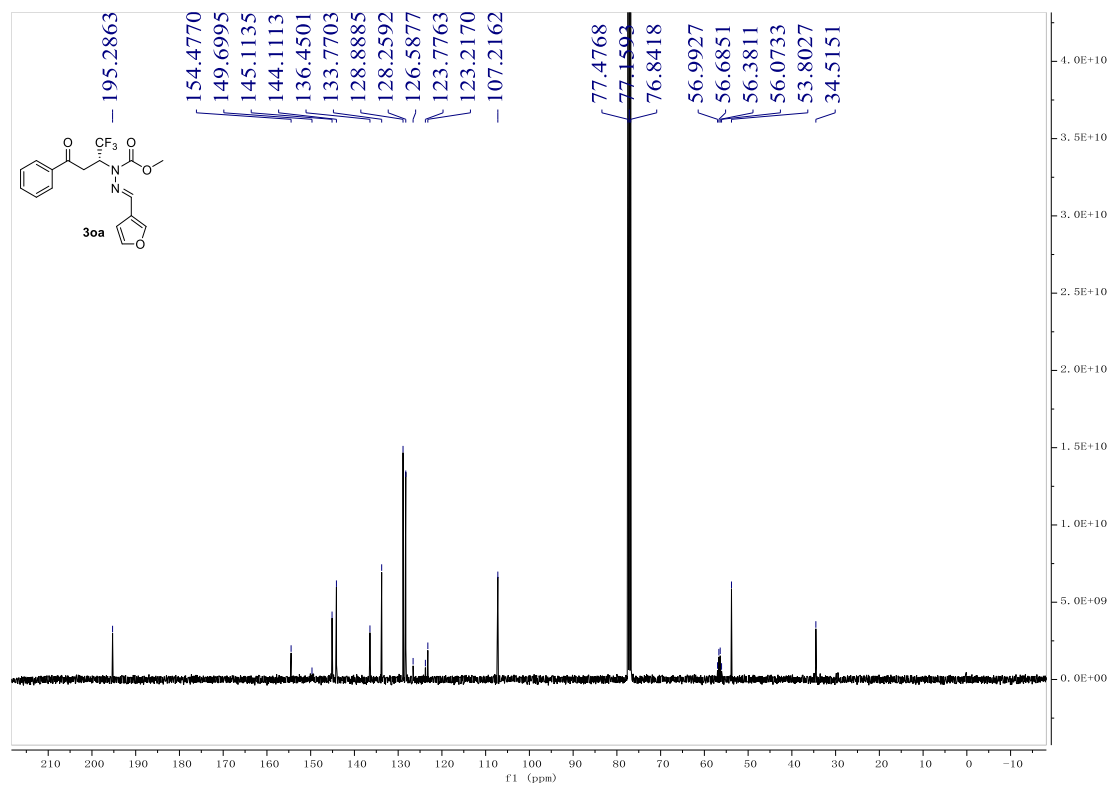

$^{19}\text{F}\{^1\text{H}\}$  NMR of **3oa** (376 MHz,  $\text{CDCl}_3$ )

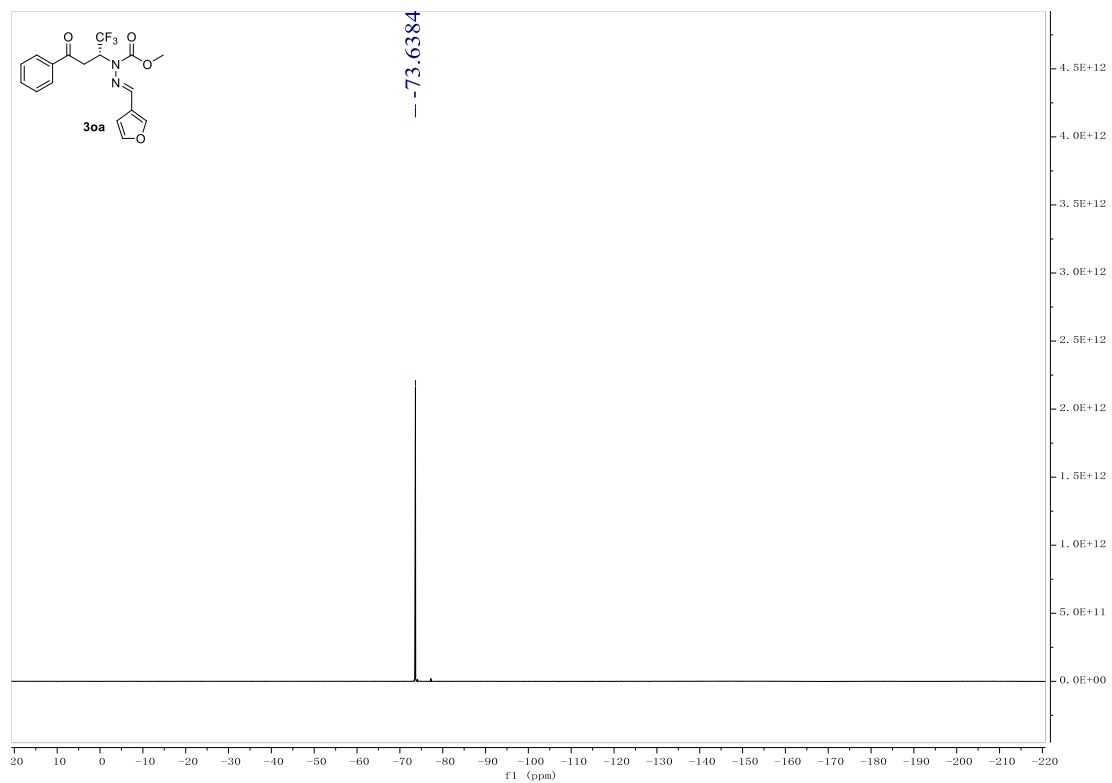

$^1\text{H}$  NMR of **3pa** (400 MHz,  $\text{CDCl}_3$ )

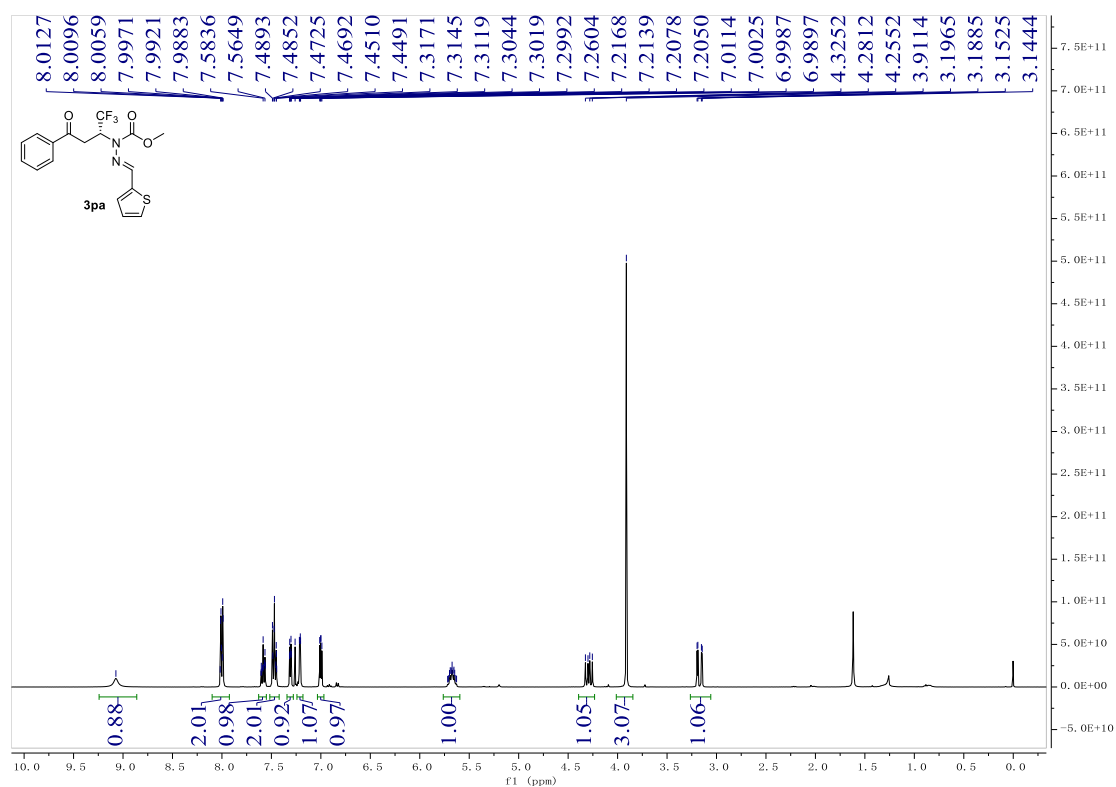

**<sup>13</sup>C{<sup>1</sup>H} NMR of 3pa (100 MHz, CDCl<sub>3</sub>)**

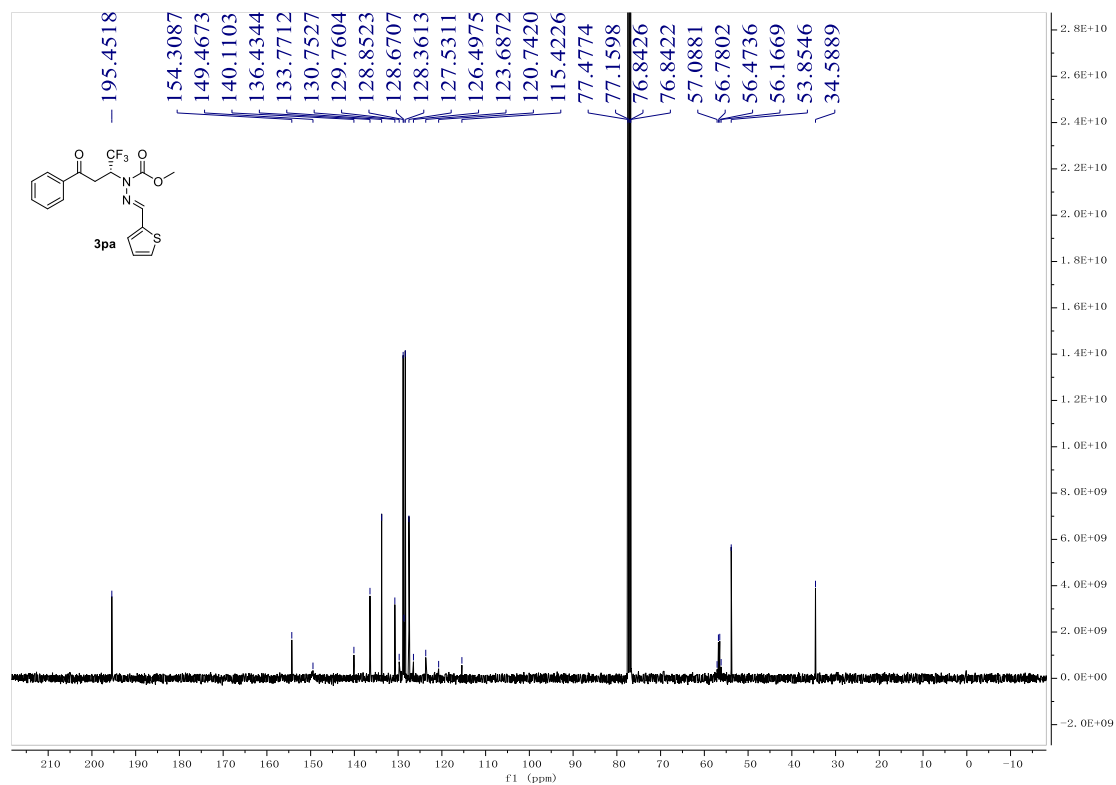

**<sup>19</sup>F{<sup>1</sup>H} NMR of 3pa (376 MHz, CDCl<sub>3</sub>)**



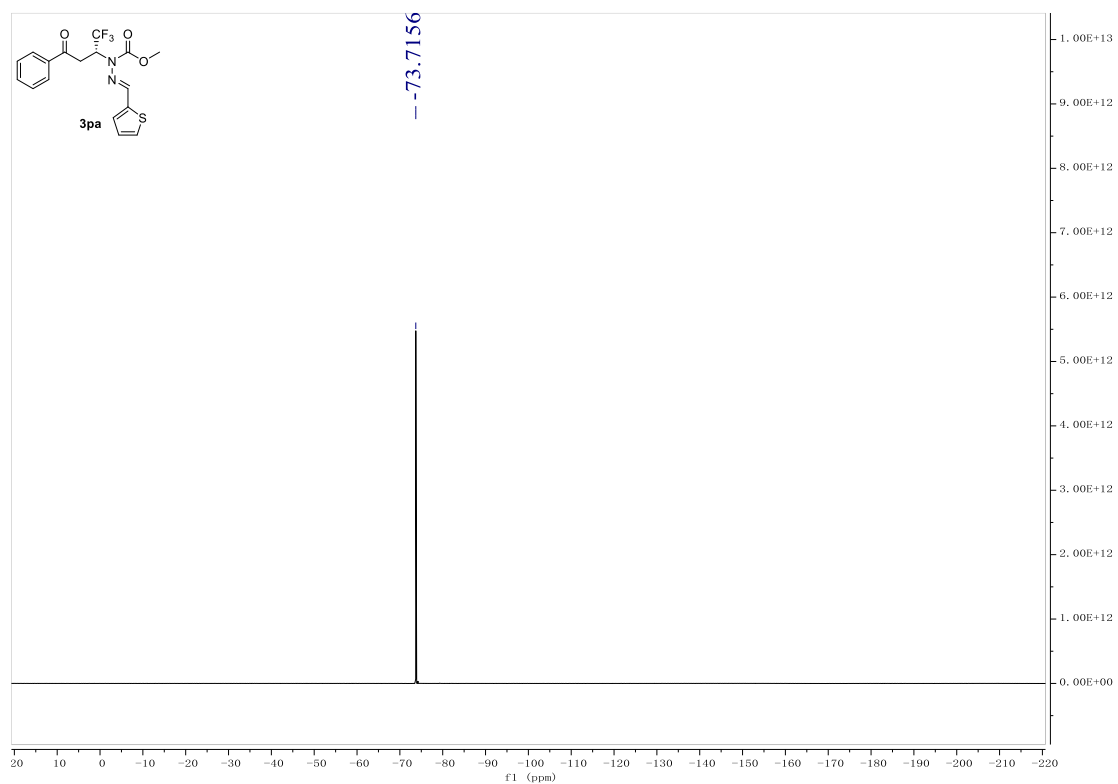

**$^1\text{H}$  NMR of 3qa (400 MHz,  $\text{CDCl}_3$ )**

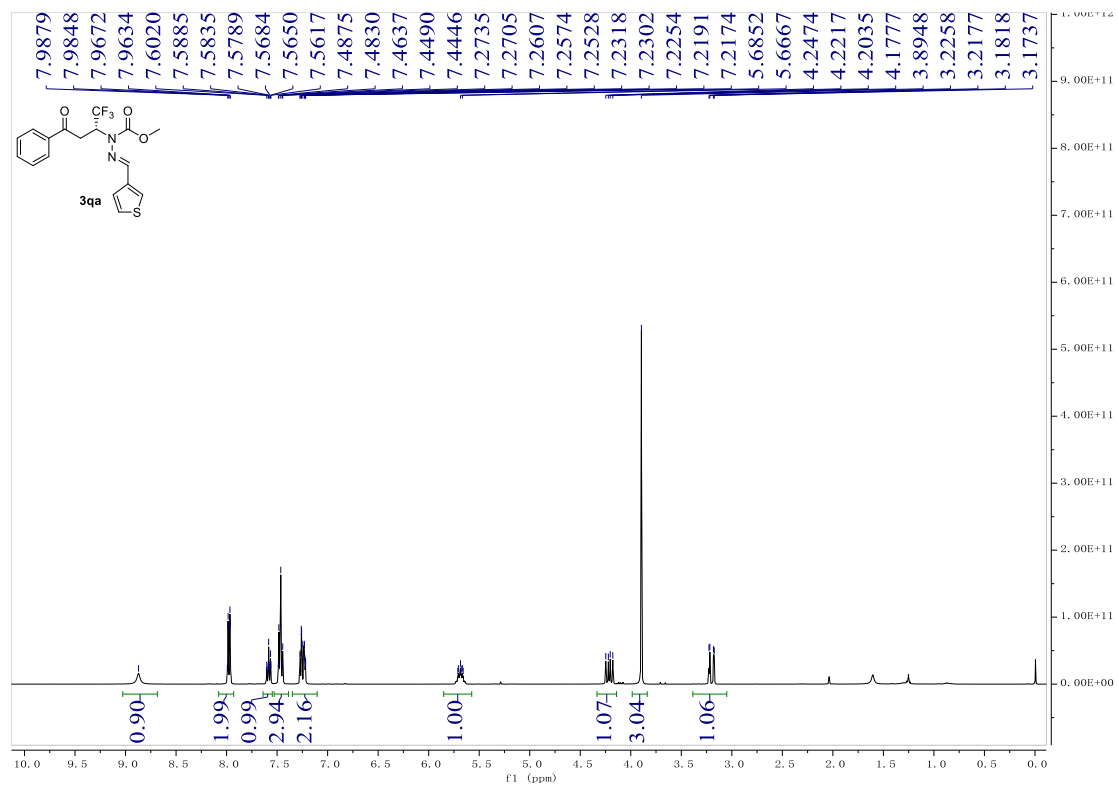

**$^{13}\text{C}\{^1\text{H}\}$  NMR of 3qa (100 MHz,  $\text{CDCl}_3$ )**

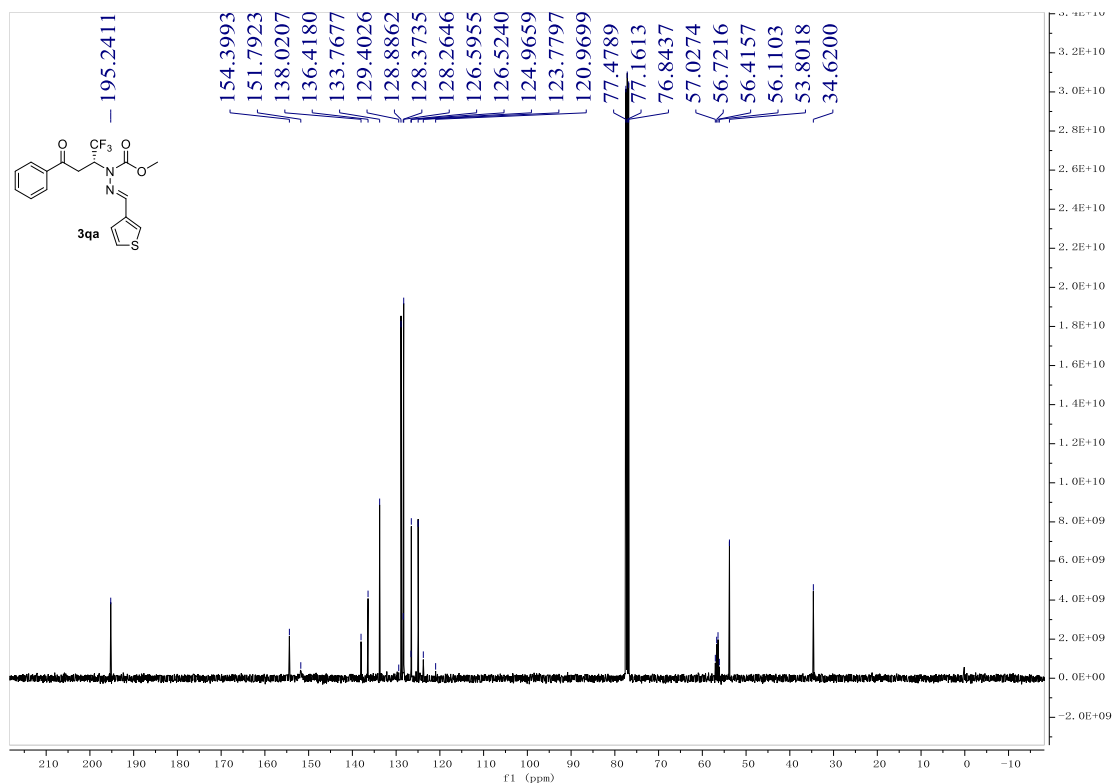

**<sup>19</sup>F{<sup>1</sup>H} NMR of 3qa (376 MHz, CDCl<sub>3</sub>)**

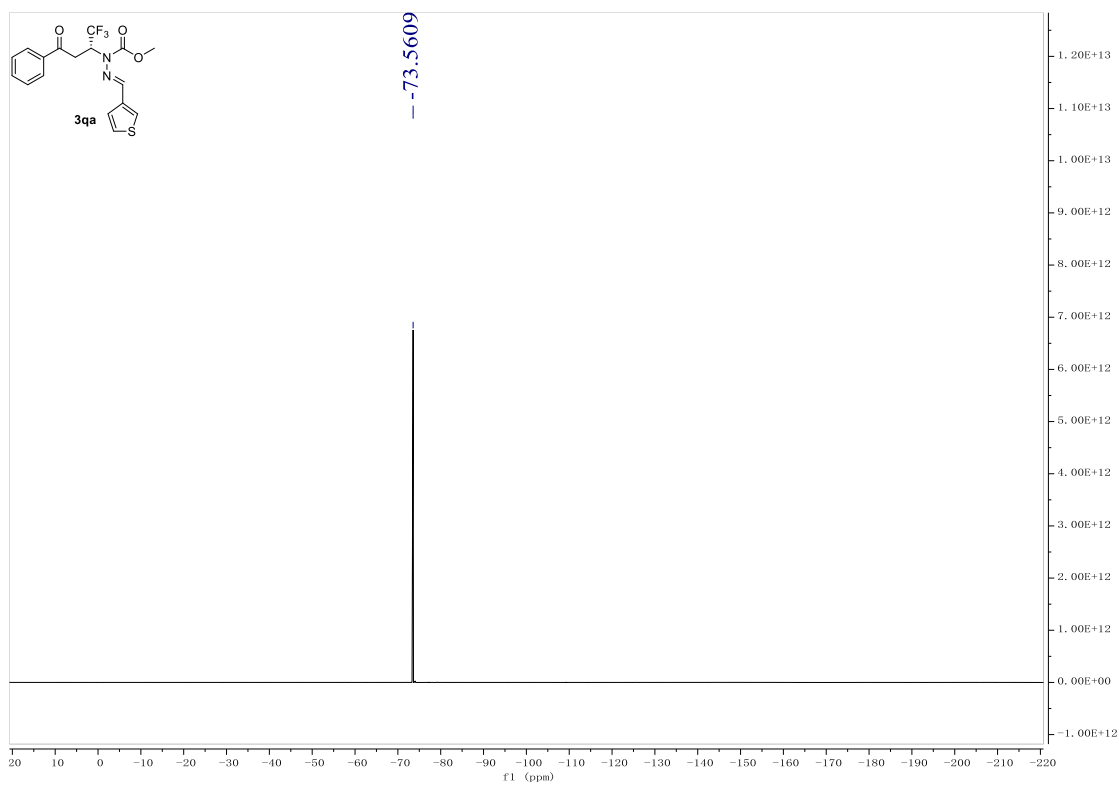

**<sup>1</sup>H NMR of 3ra (400 MHz, CDCl<sub>3</sub>)**

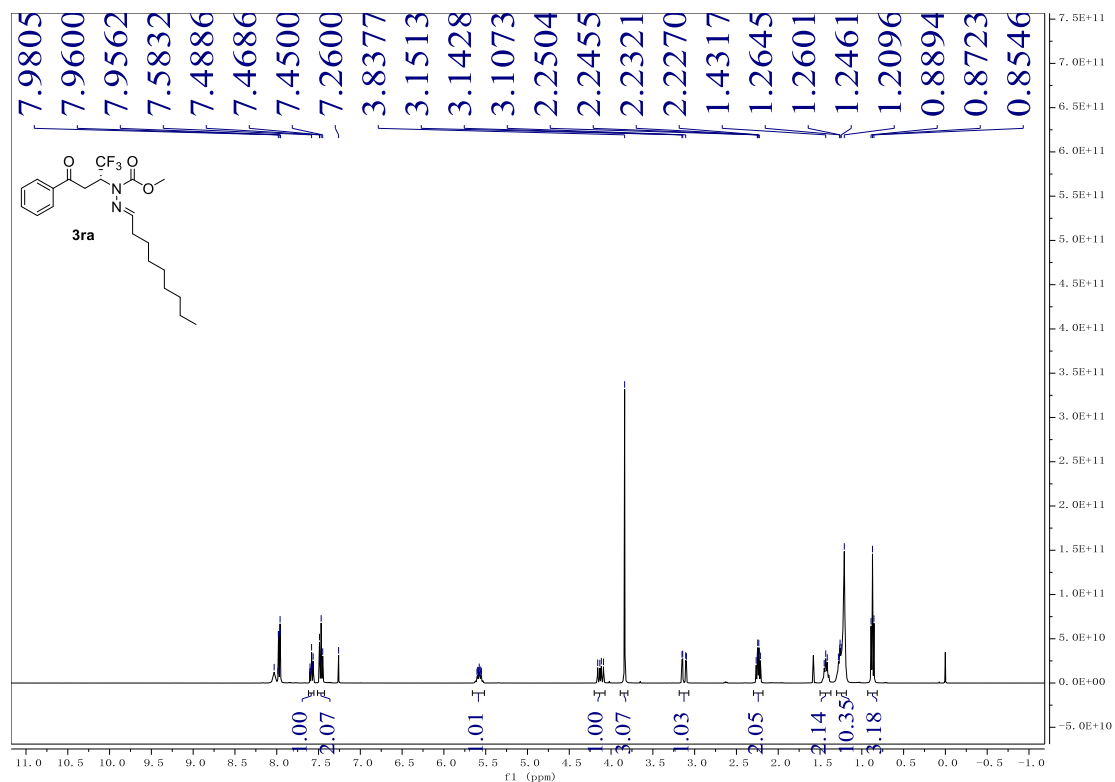

**<sup>13</sup>C{<sup>1</sup>H} NMR of 3ra (100 MHz, CDCl<sub>3</sub>)**

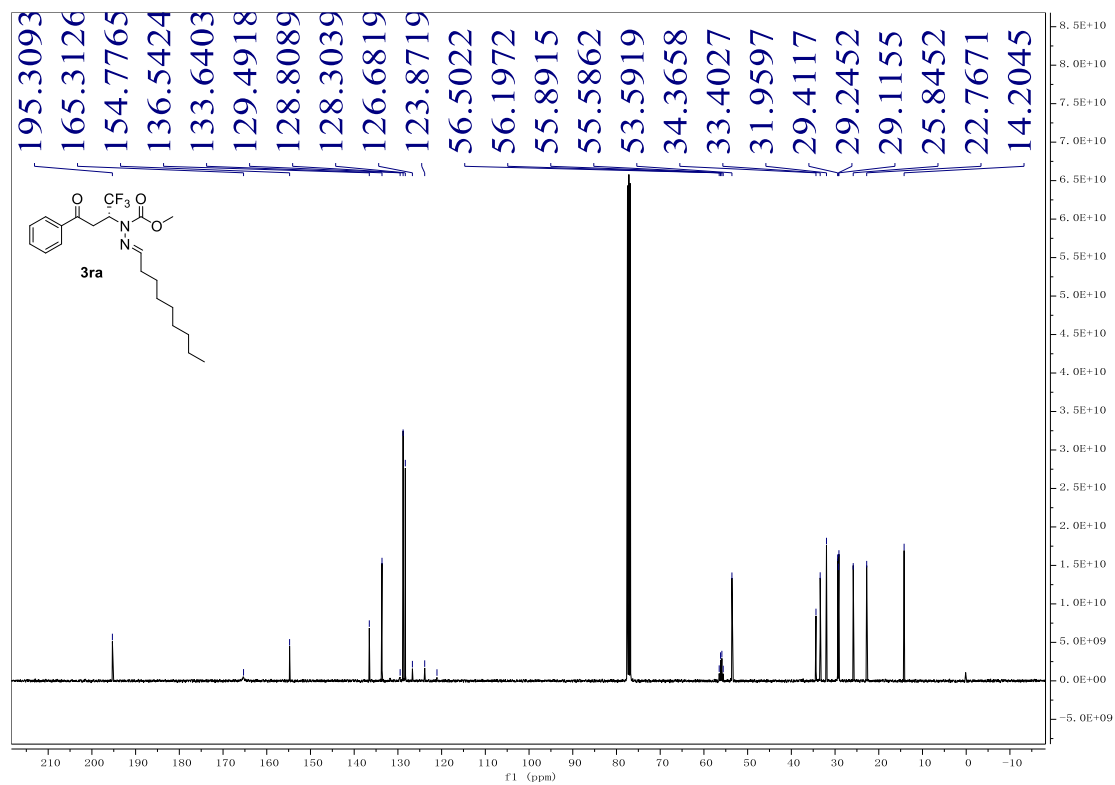

**<sup>19</sup>F{<sup>1</sup>H} NMR of 3ra (376 MHz, CDCl<sub>3</sub>)**

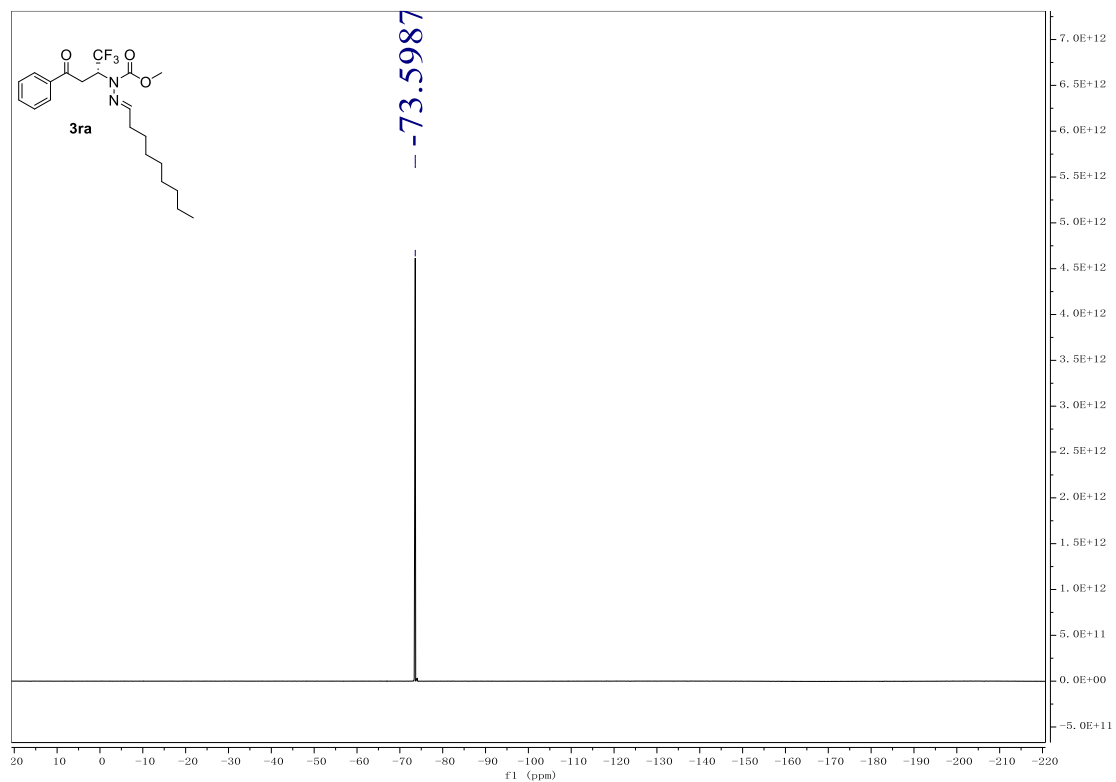

**$^1\text{H}$  NMR of 3sa (400 MHz,  $\text{CDCl}_3$ )**

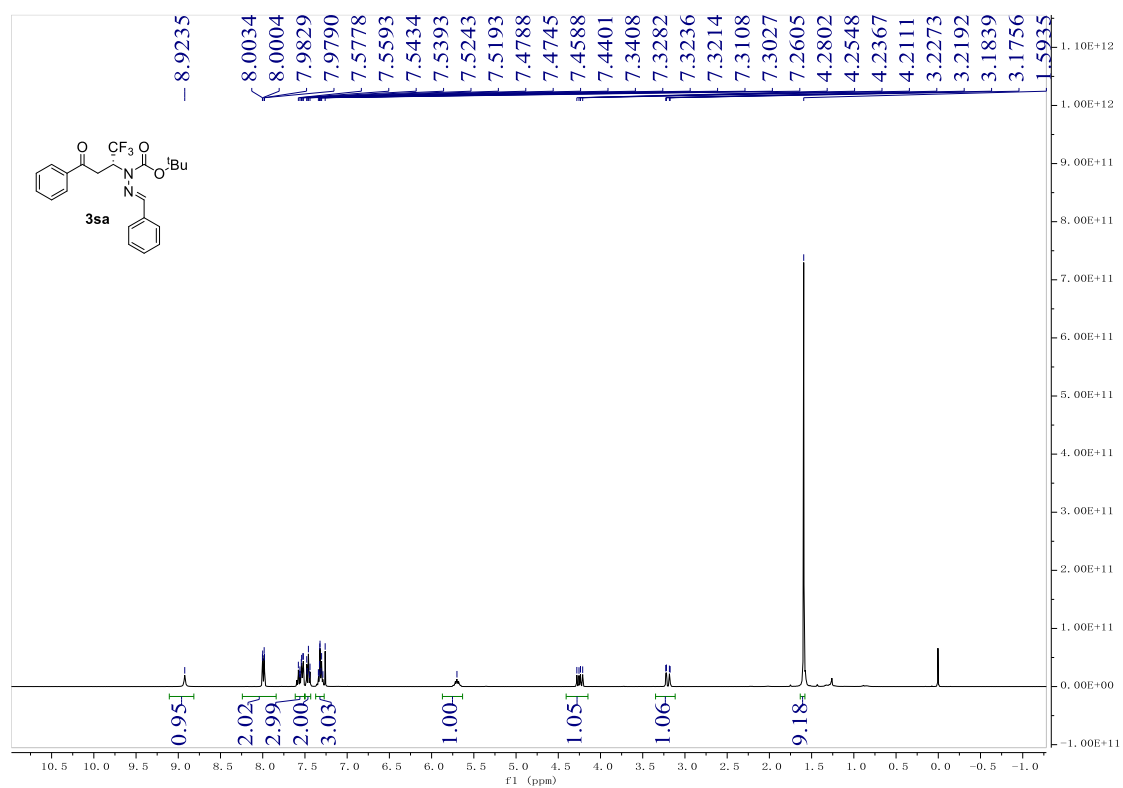

**$^{13}\text{C}\{^1\text{H}\}$  NMR of 3sa (100 MHz,  $\text{CDCl}_3$ )**

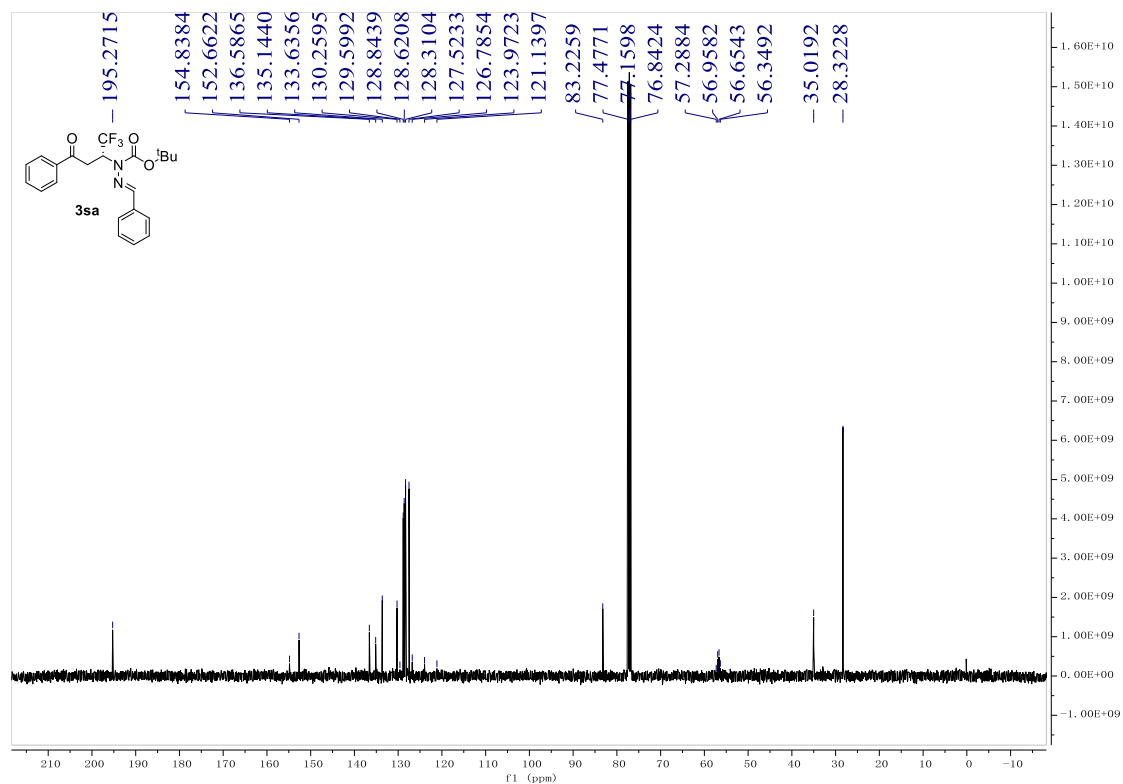

**<sup>19</sup>F{<sup>1</sup>H} NMR of 3sa (376 MHz, CDCl<sub>3</sub>)**

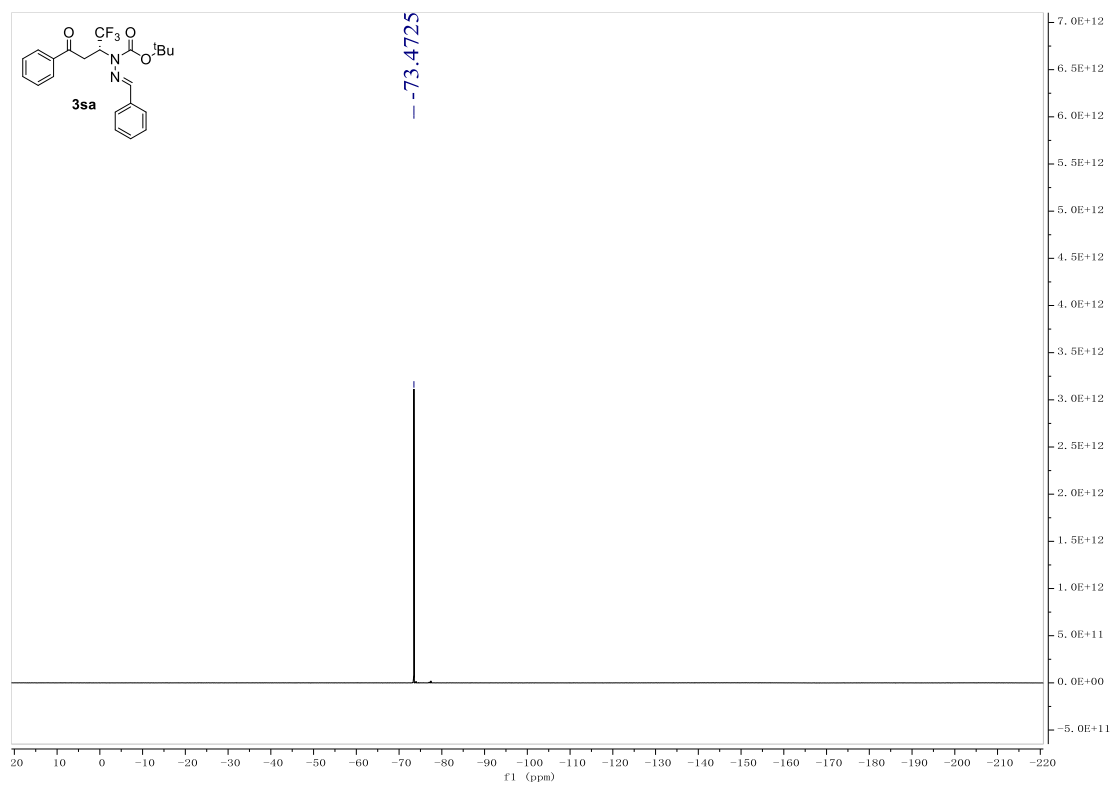

**<sup>1</sup>H NMR of 3ta (400 MHz, CDCl<sub>3</sub>)**

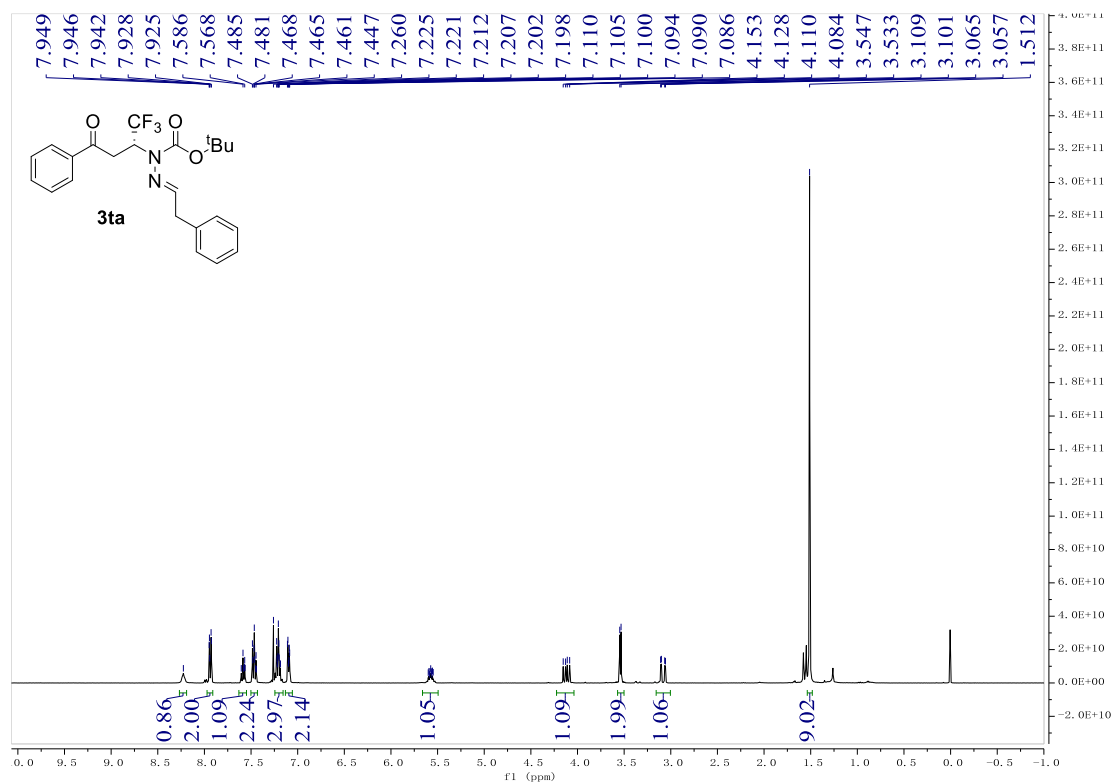

**<sup>13</sup>C{<sup>1</sup>H} NMR of 3ta (100 MHz, CDCl<sub>3</sub>)**

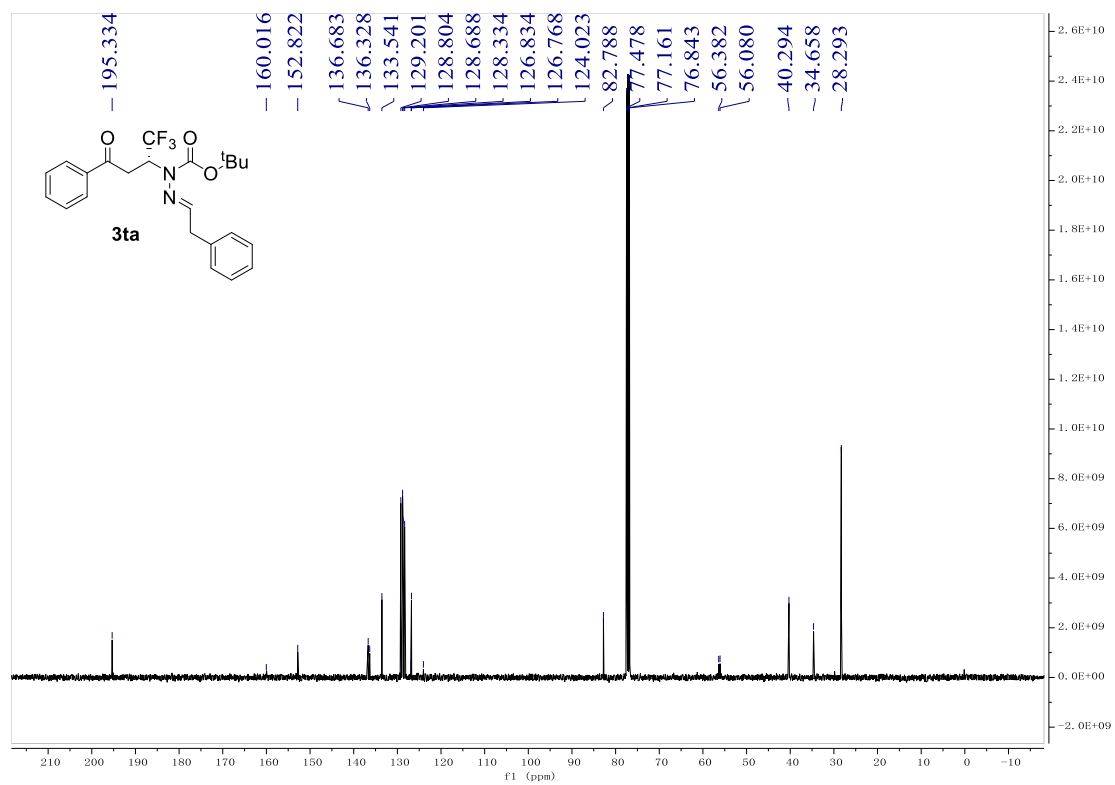

**<sup>19</sup>F{<sup>1</sup>H} NMR of 3ta (376 MHz, CDCl<sub>3</sub>)**

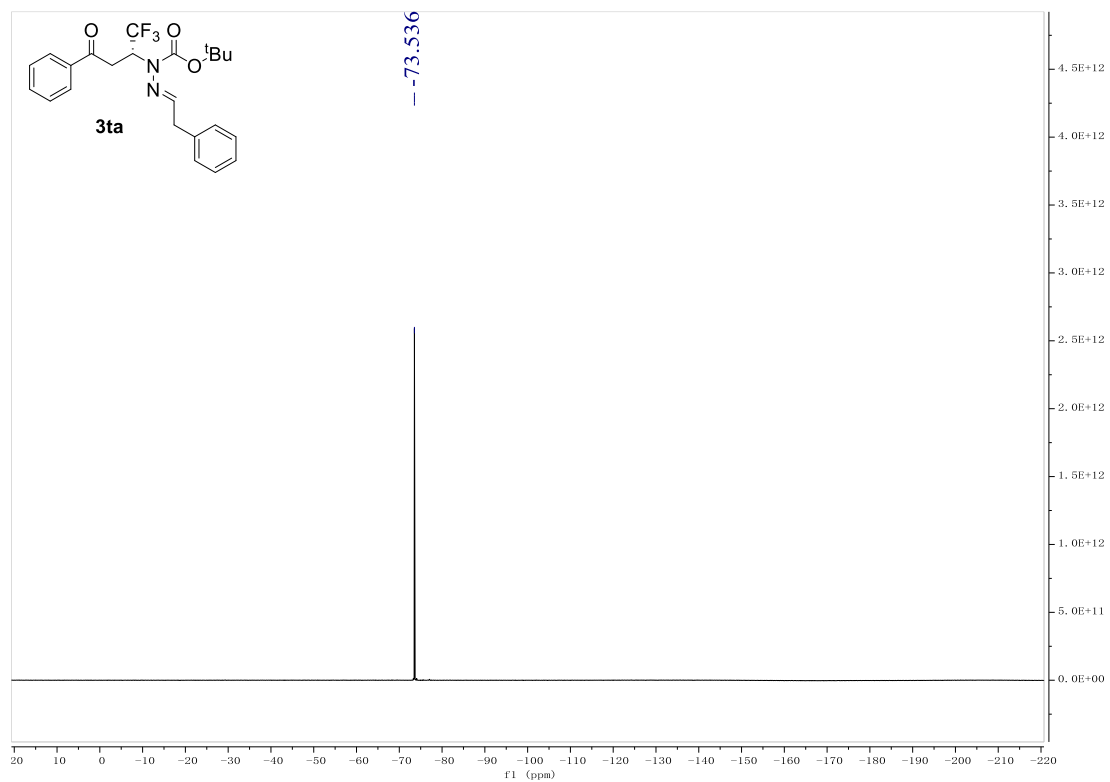

**<sup>1</sup>H NMR of 4aa (600 MHz, CDCl<sub>3</sub>)**

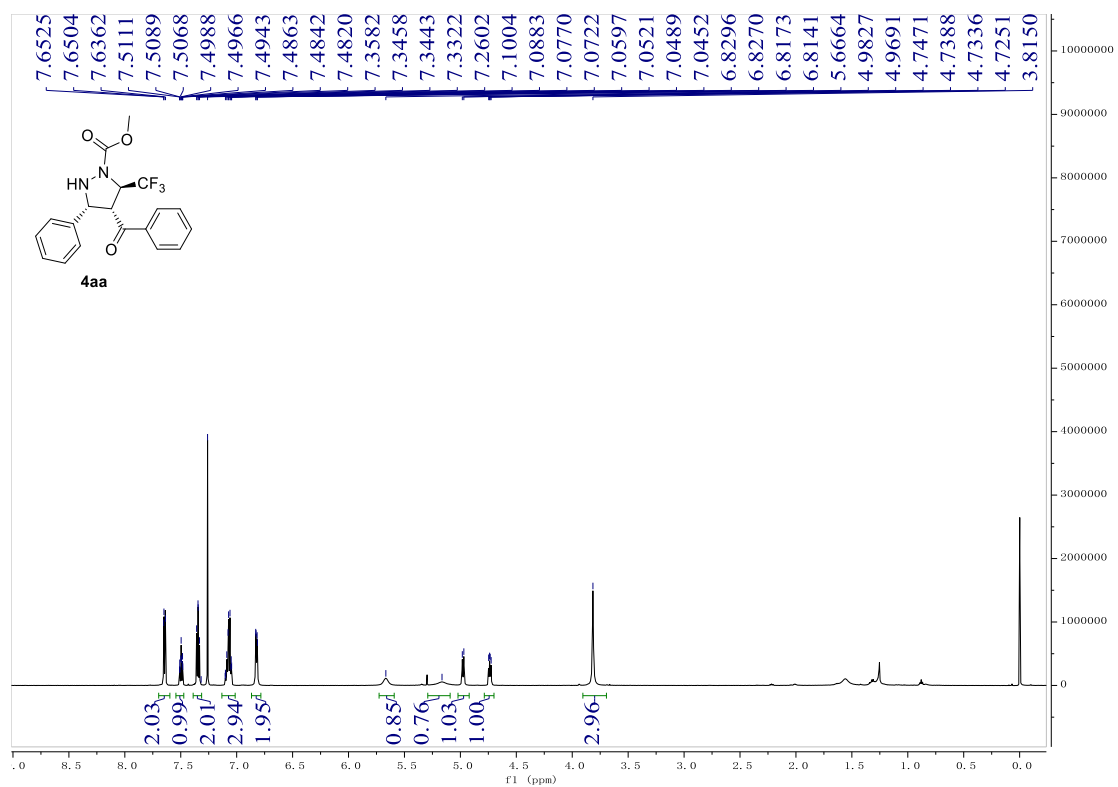

**<sup>13</sup>C{<sup>1</sup>H} NMR of 4aa (100 MHz, CDCl<sub>3</sub>)**

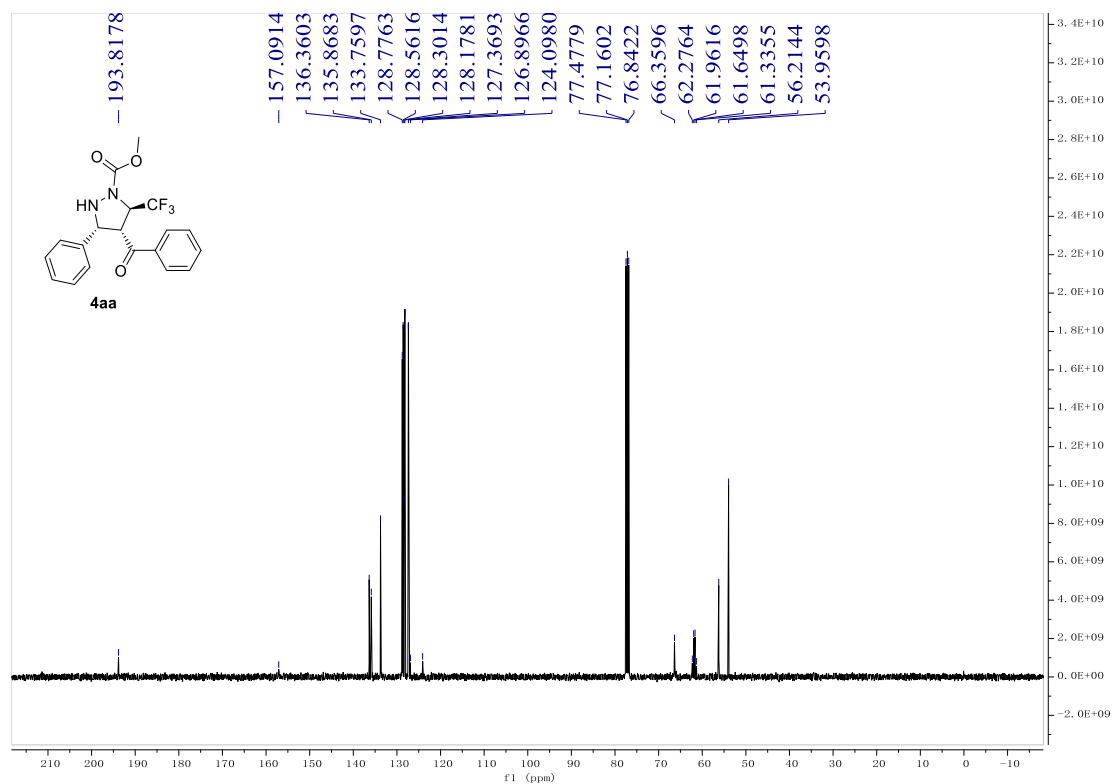

**$^{19}\text{F}\{^1\text{H}\}$  NMR of 4aa (376 MHz,  $\text{CDCl}_3$ )**

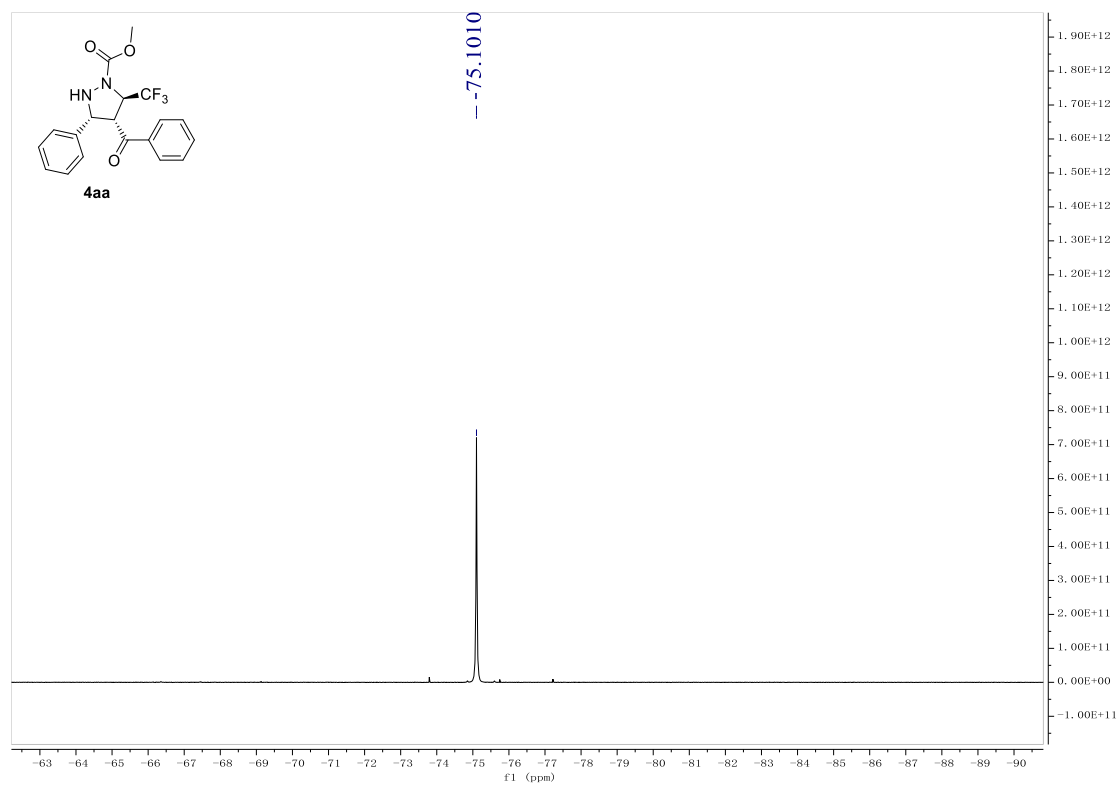

**$^1\text{H}$  NMR of 4ab (600 MHz,  $\text{CDCl}_3$ )**



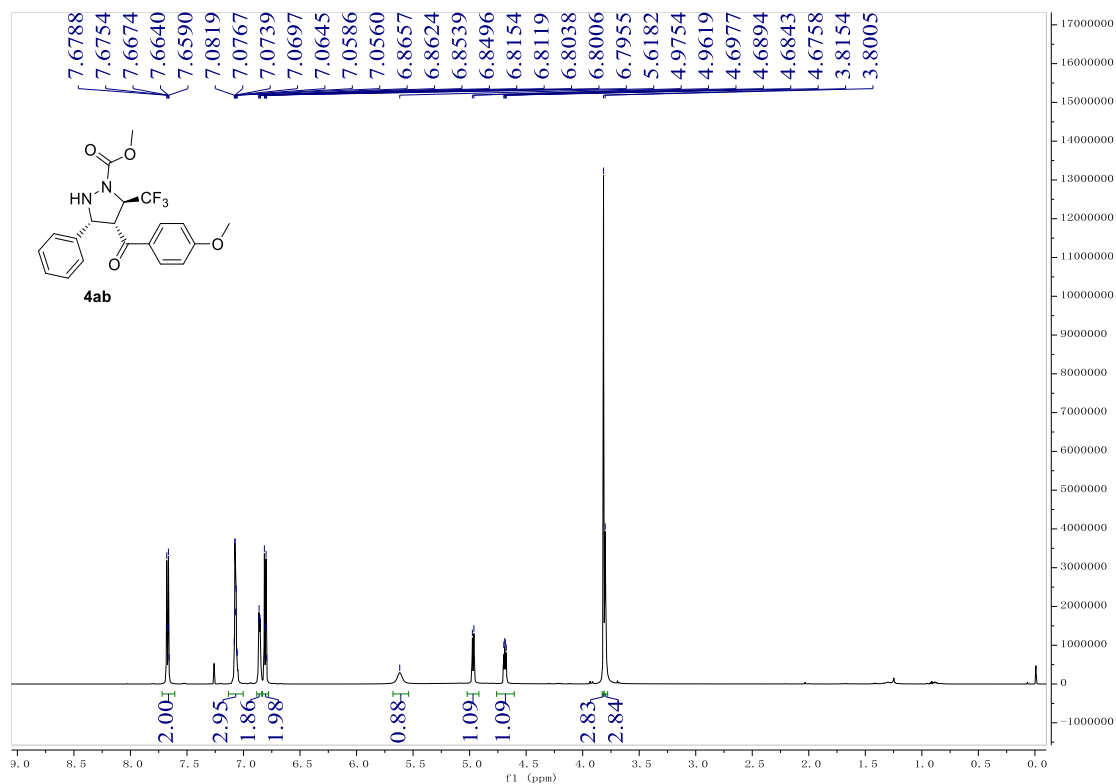

**<sup>13</sup>C{<sup>1</sup>H} NMR of 4ab (150 MHz, CDCl<sub>3</sub>)**

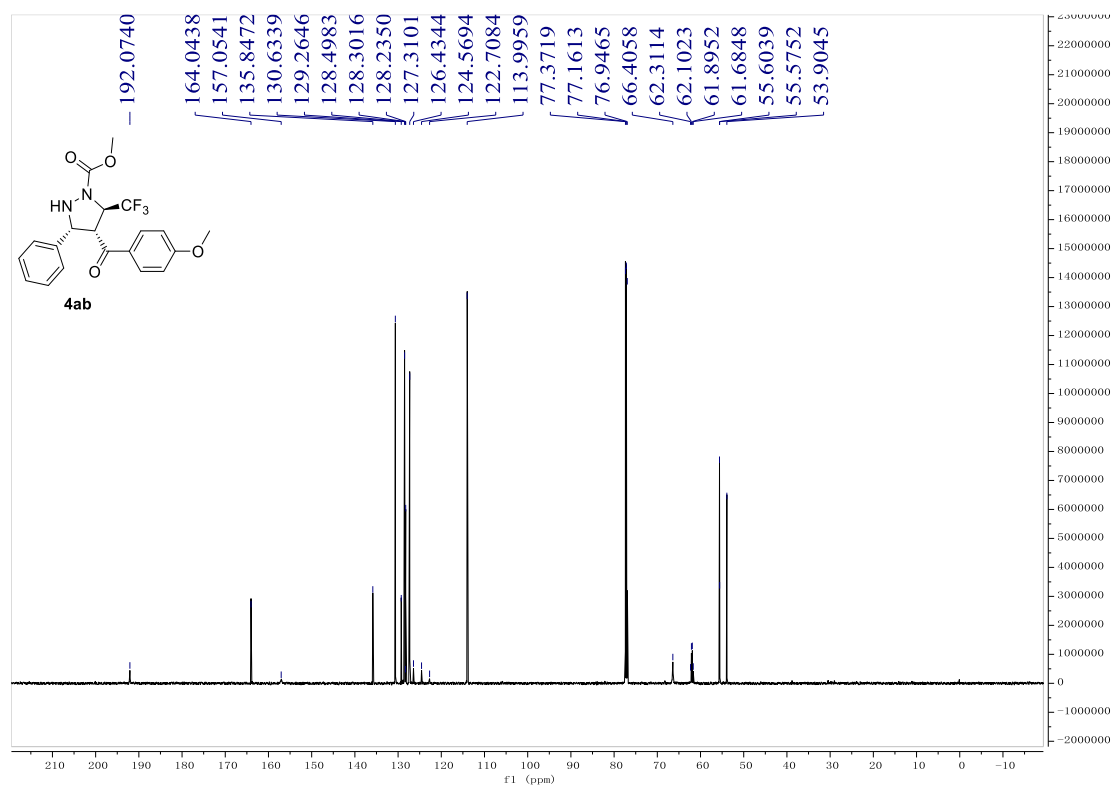

**<sup>19</sup>F{<sup>1</sup>H} NMR of 4ab (565 MHz, CDCl<sub>3</sub>)**

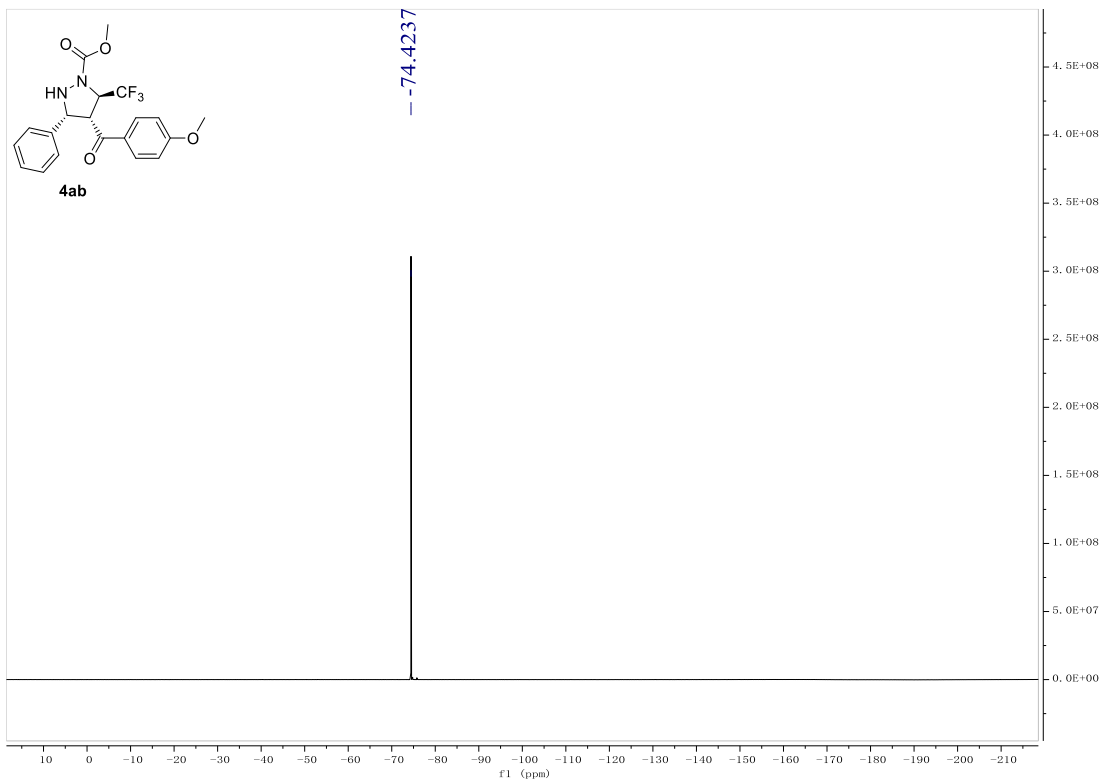

**$^1\text{H}$  NMR of 4ac (600 MHz,  $\text{CDCl}_3$ )**

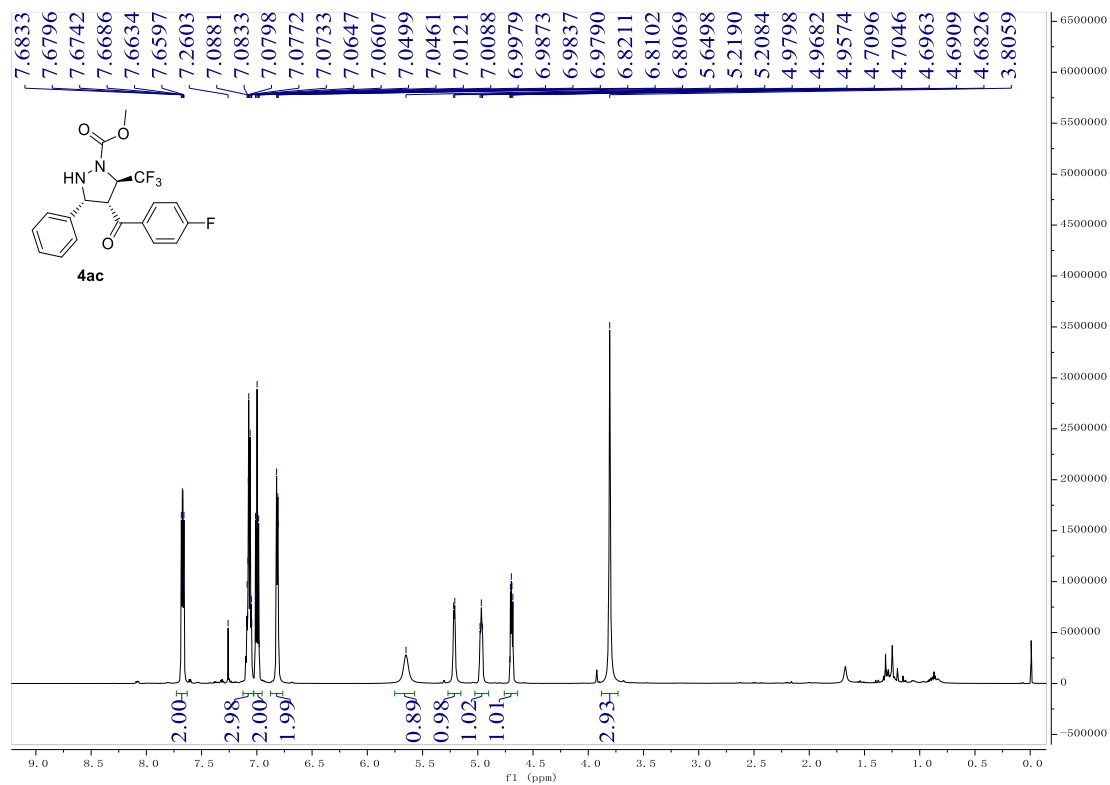

**$^{13}\text{C}\{^1\text{H}\}$  NMR of 4ac (150 MHz,  $\text{CDCl}_3$ )**

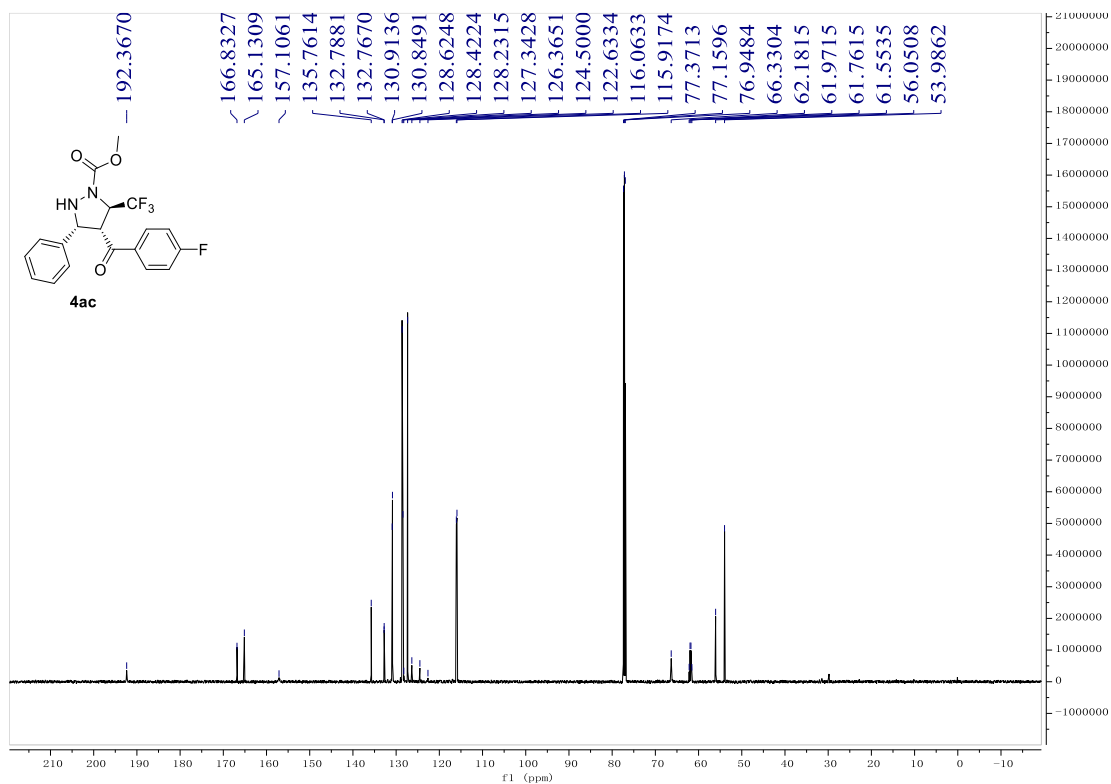

**<sup>19</sup>F{<sup>1</sup>H} NMR of 4ac (565 MHz, CDCl<sub>3</sub>)**

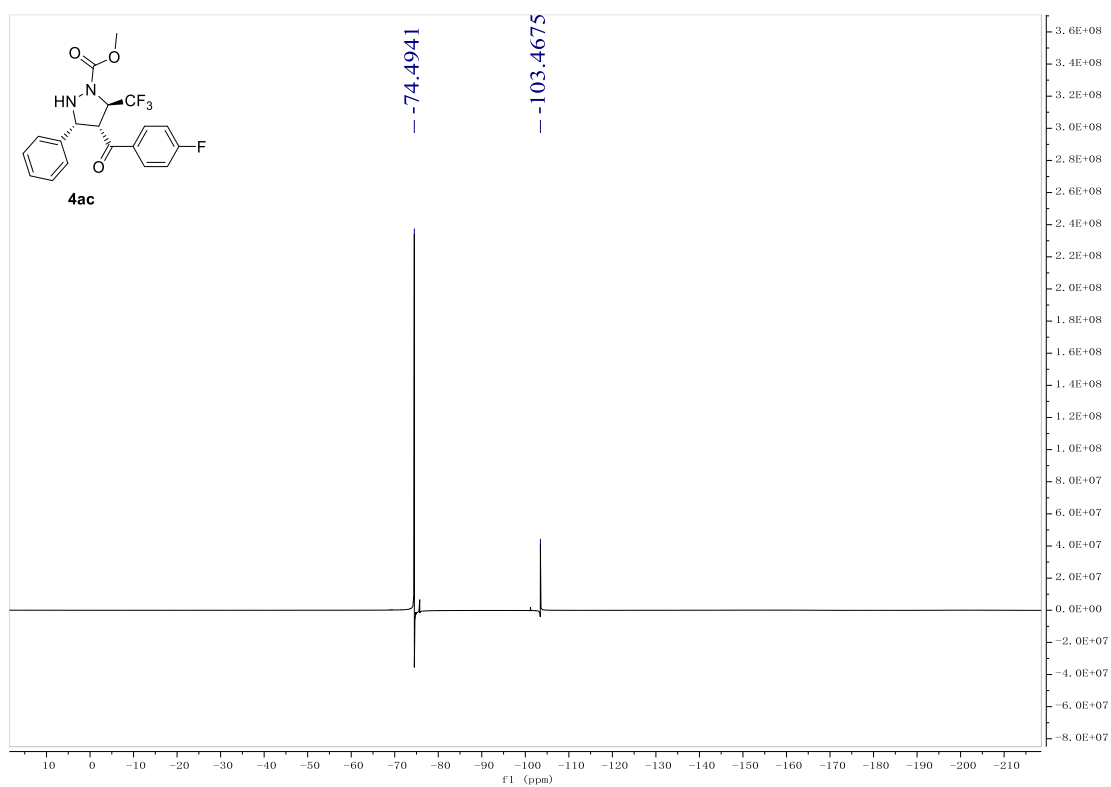

**<sup>1</sup>H NMR of 4ad (600 MHz, CDCl<sub>3</sub>)**

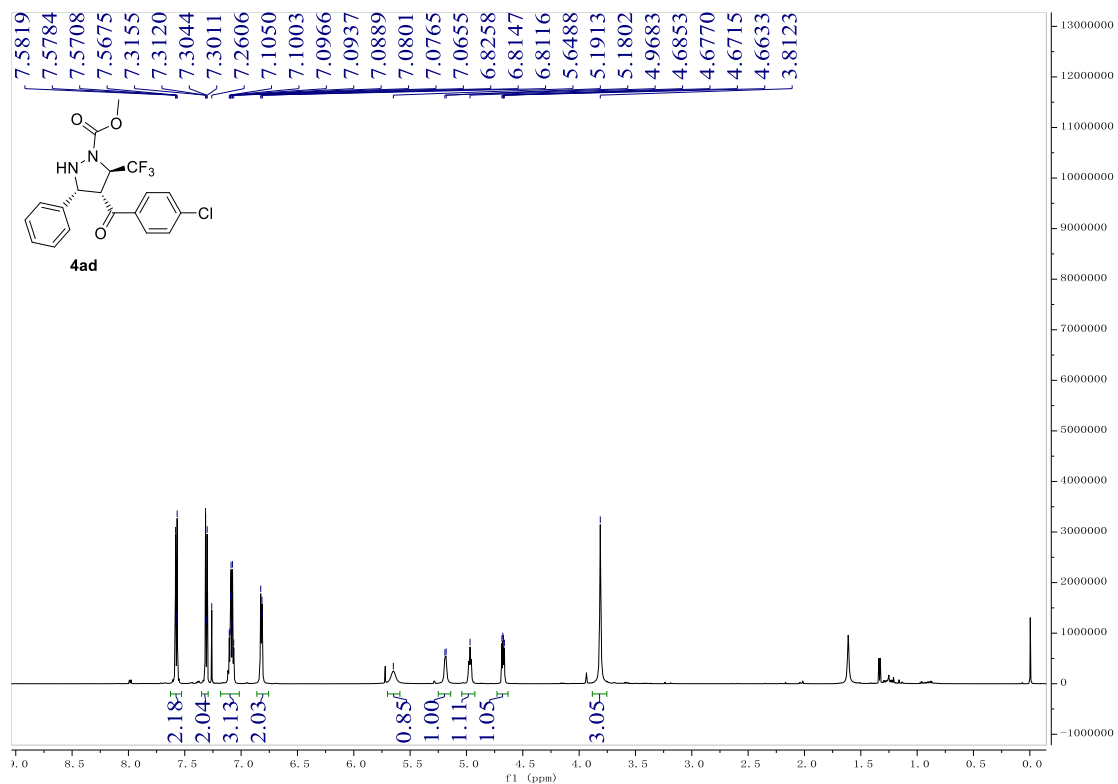

**<sup>13</sup>C{<sup>1</sup>H} NMR of 4ad (150 MHz, CDCl<sub>3</sub>)**

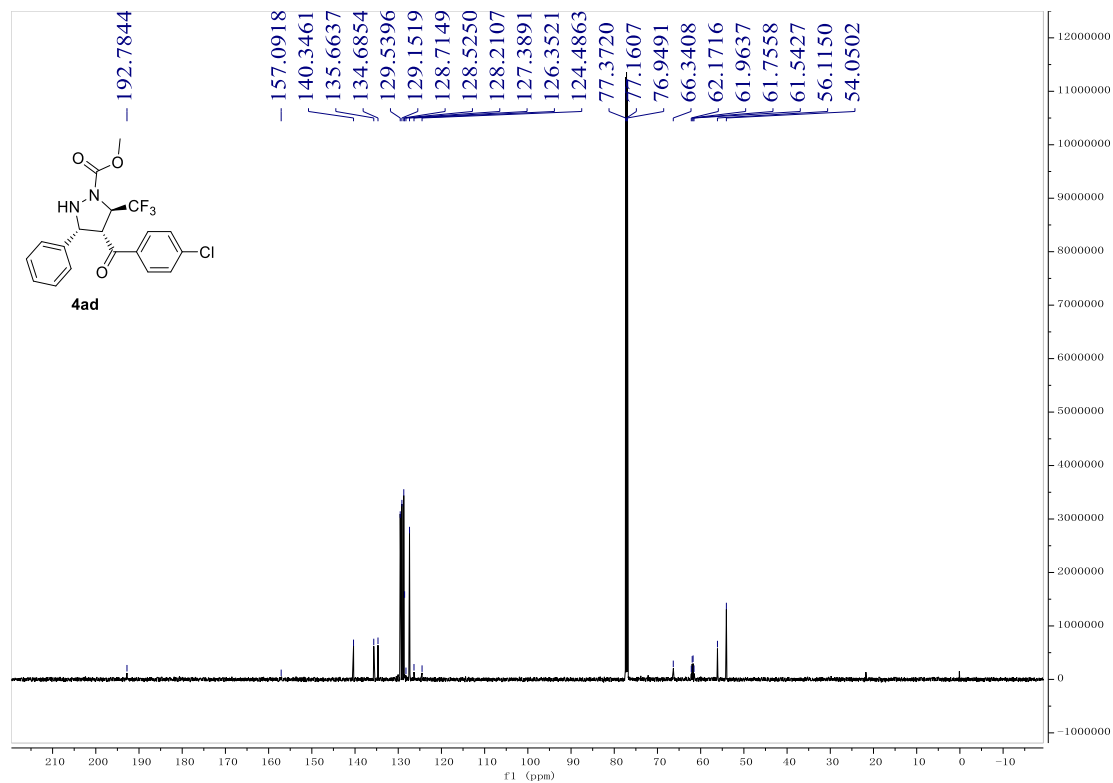

**<sup>19</sup>F{<sup>1</sup>H} NMR of 4ad (376 MHz, CDCl<sub>3</sub>)**

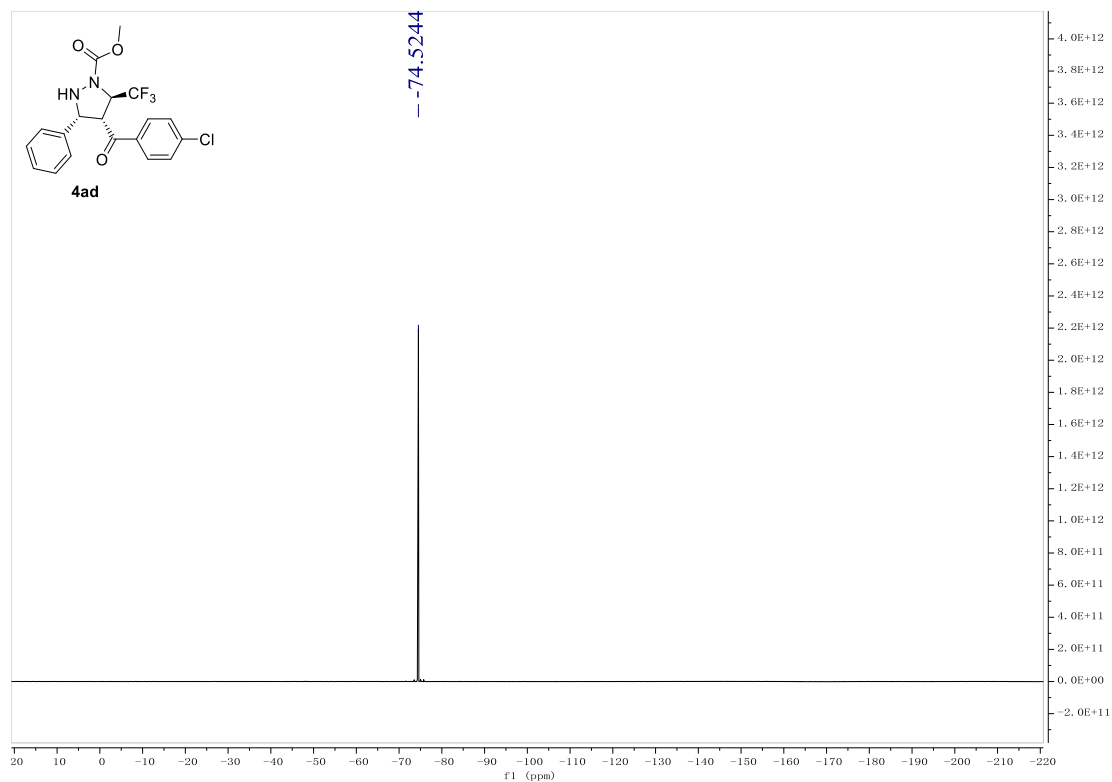

**$^1\text{H}$  NMR of 4ae (600 MHz,  $\text{CDCl}_3$ )**

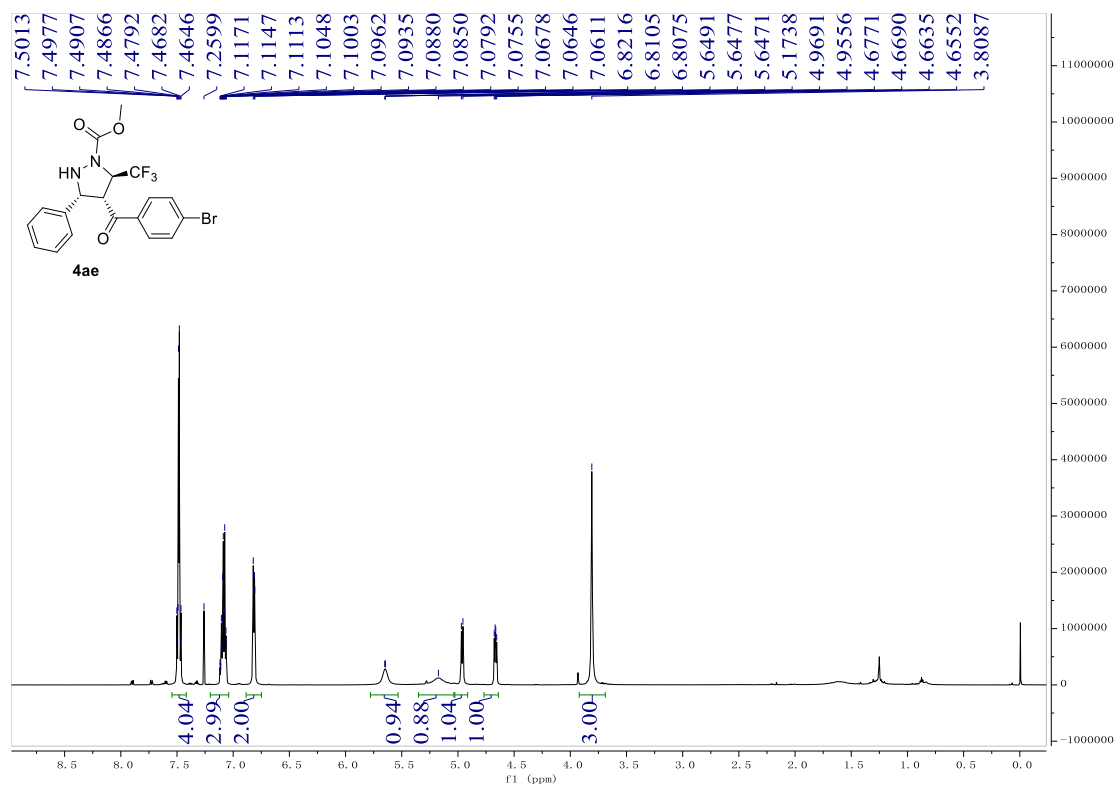

**$^{13}\text{C}\{^1\text{H}\}$  NMR of 4ae (150 MHz,  $\text{CDCl}_3$ )**

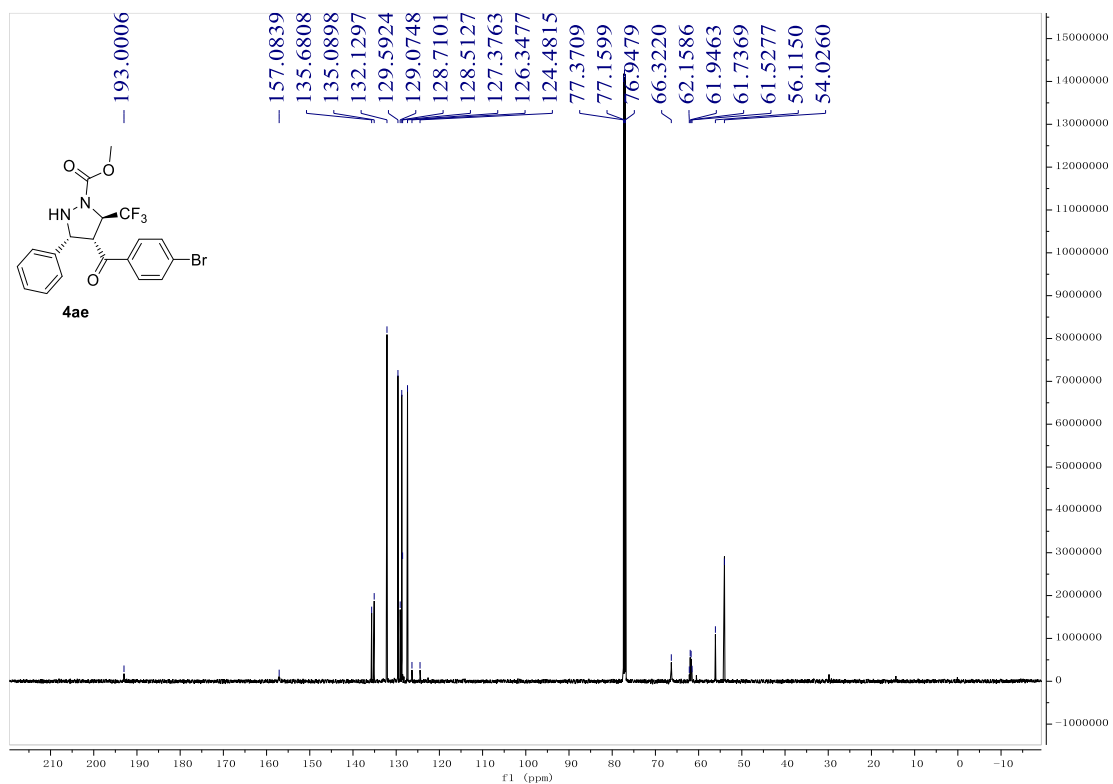

**<sup>19</sup>F{<sup>1</sup>H} NMR of 4ae (565 MHz, CDCl<sub>3</sub>)**

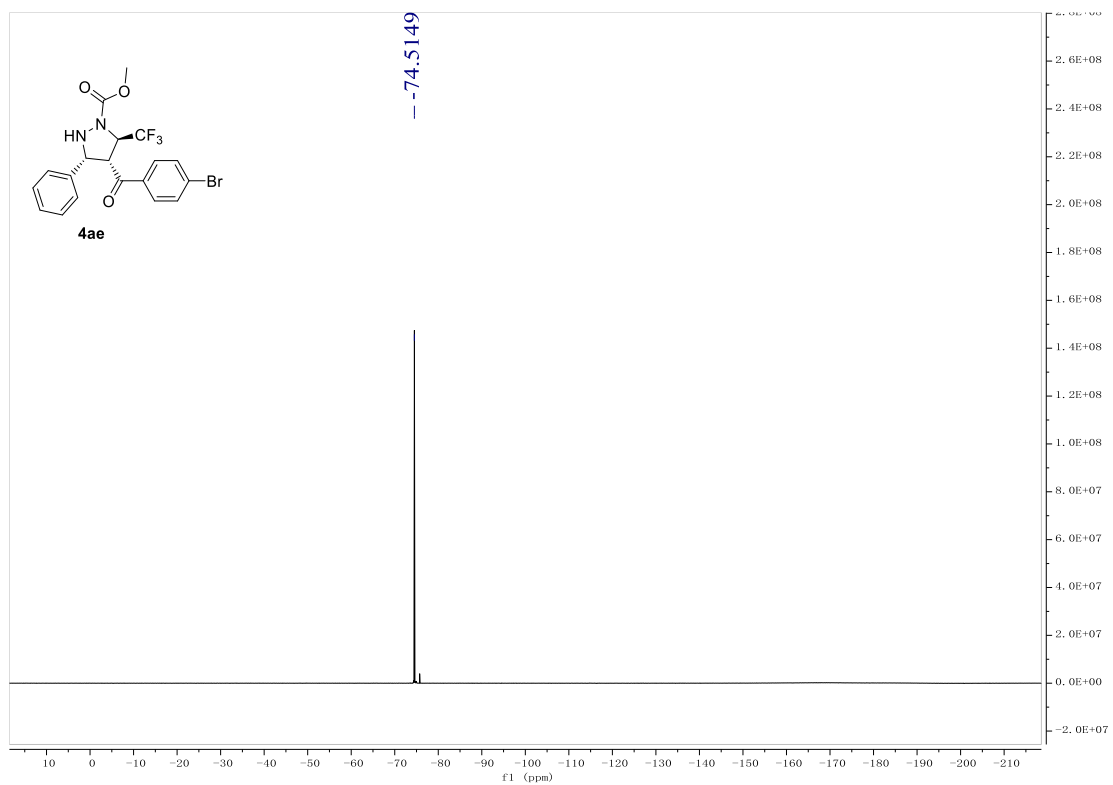

**<sup>1</sup>H NMR of 4af (600 MHz, CDCl<sub>3</sub>)**

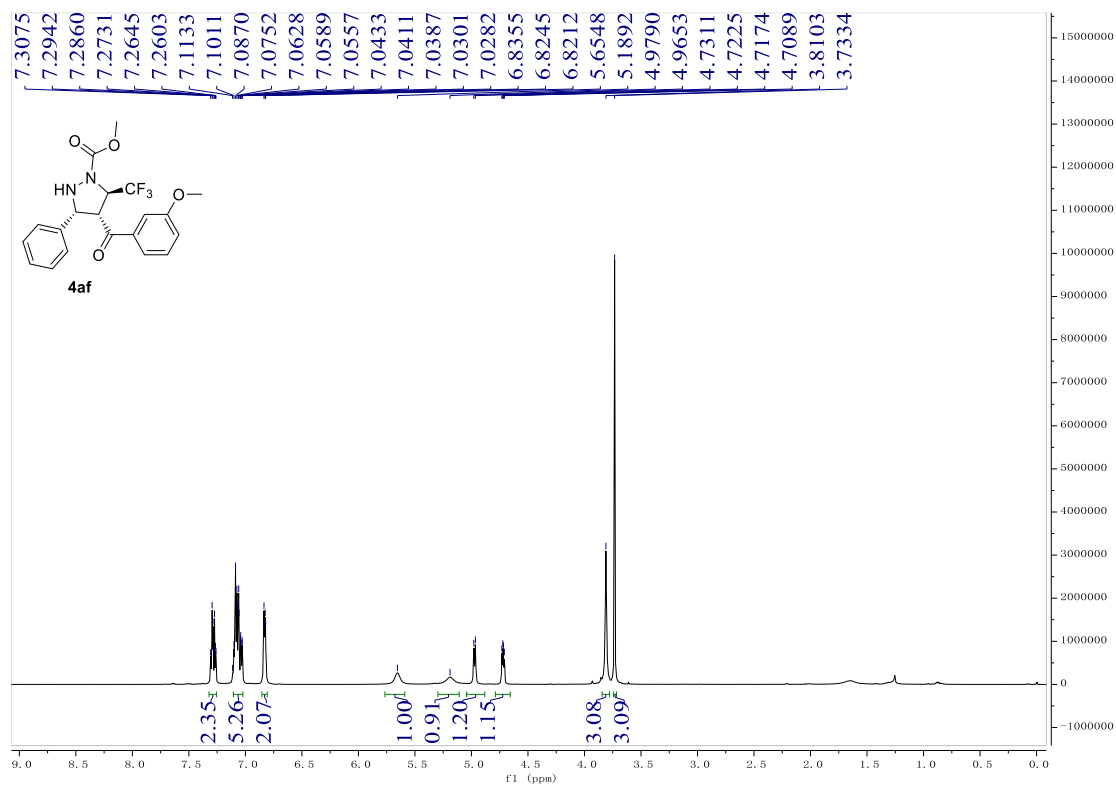

**<sup>13</sup>C{<sup>1</sup>H} NMR of 4af (150 MHz, CDCl<sub>3</sub>)**

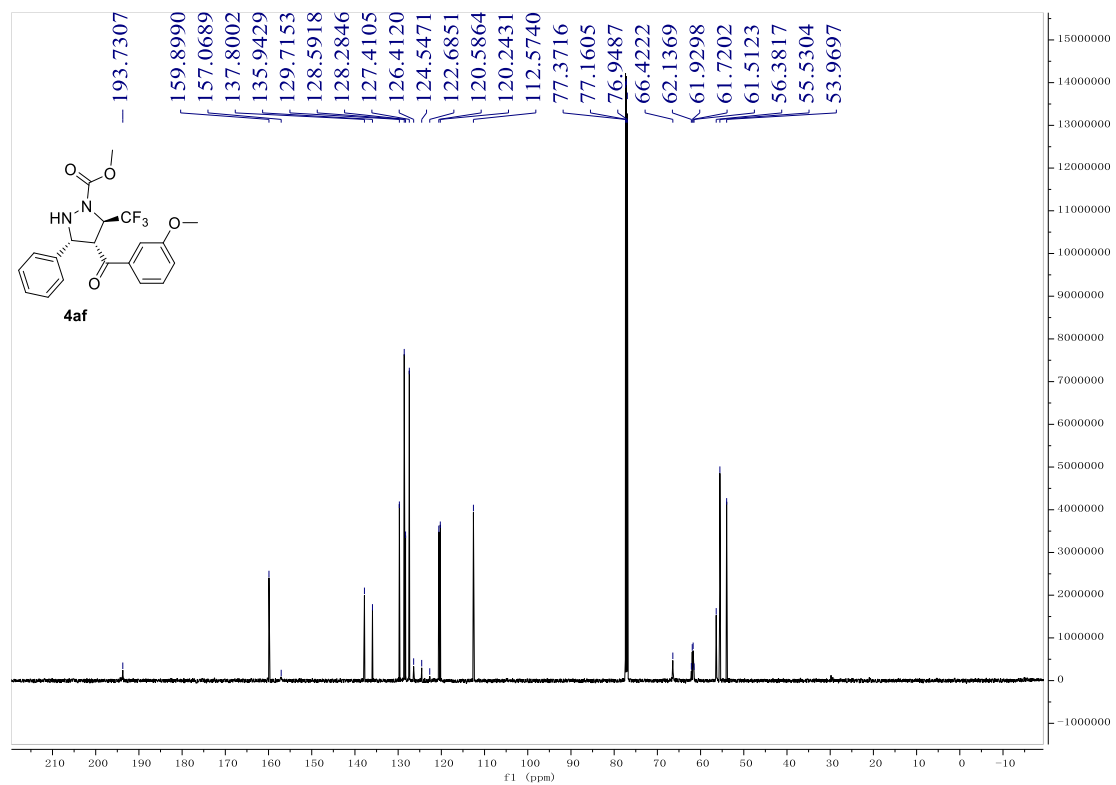

**$^{19}\text{F}\{^1\text{H}\}$  NMR of 4af (565 MHz,  $\text{CDCl}_3$ )**

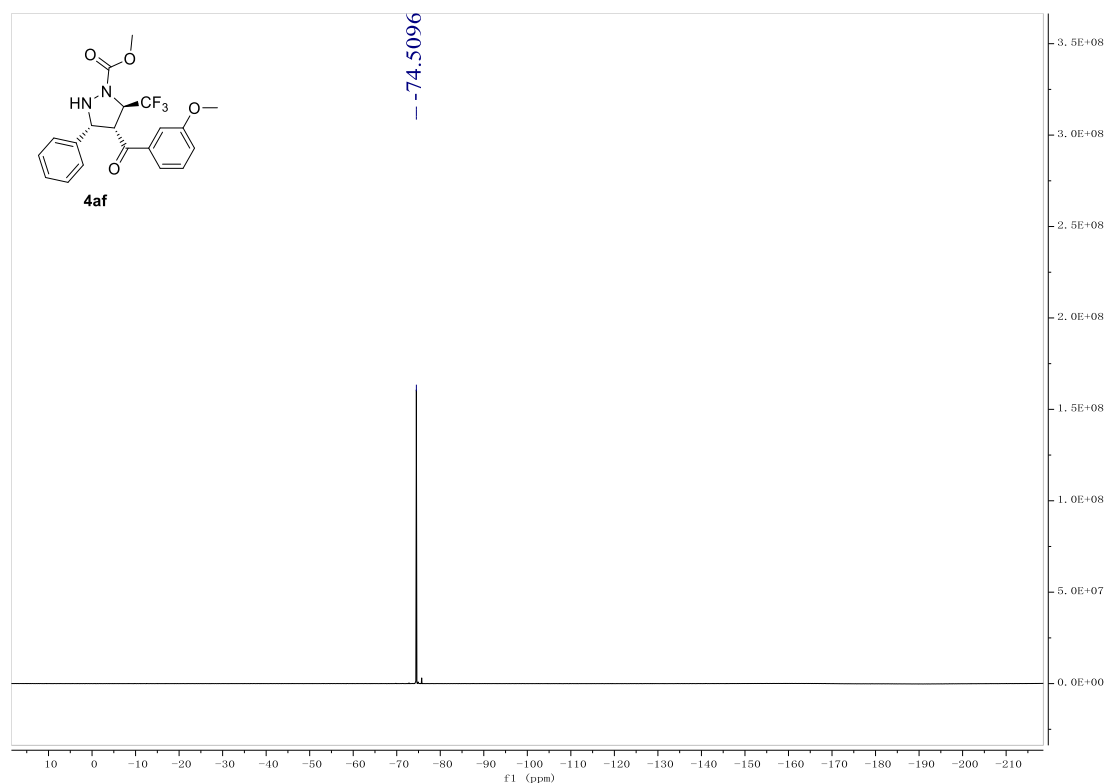

**$^1\text{H}$  NMR of 4ag (600 MHz,  $\text{CDCl}_3$ )**

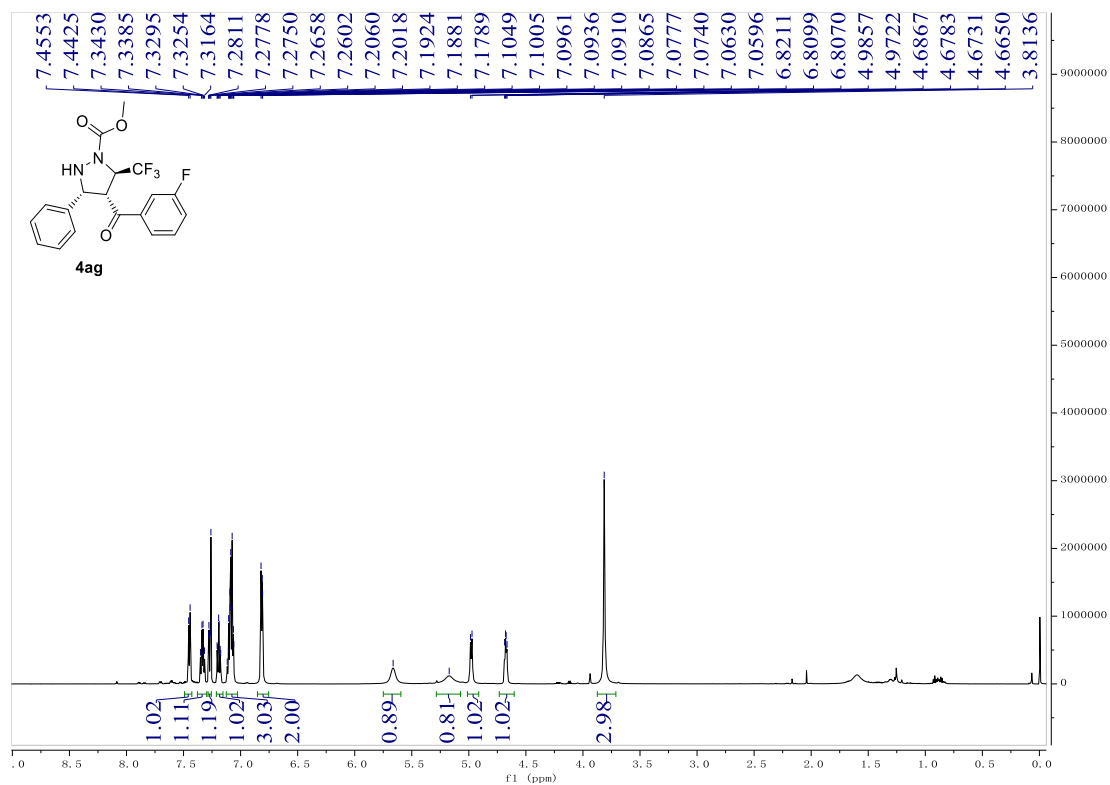

**$^{13}\text{C}\{^1\text{H}\}$  NMR of 4af (150 MHz,  $\text{CDCl}_3$ )**



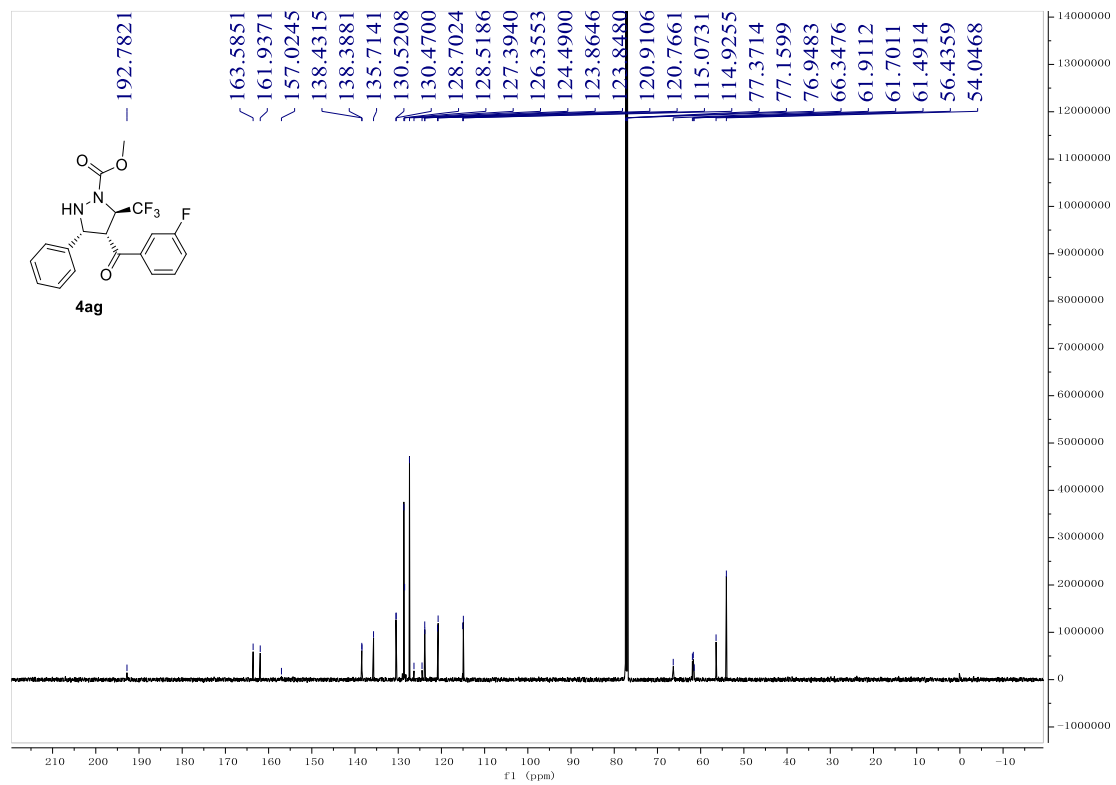

**<sup>19</sup>F{<sup>1</sup>H} NMR of 4ag (565 MHz, CDCl<sub>3</sub>)**

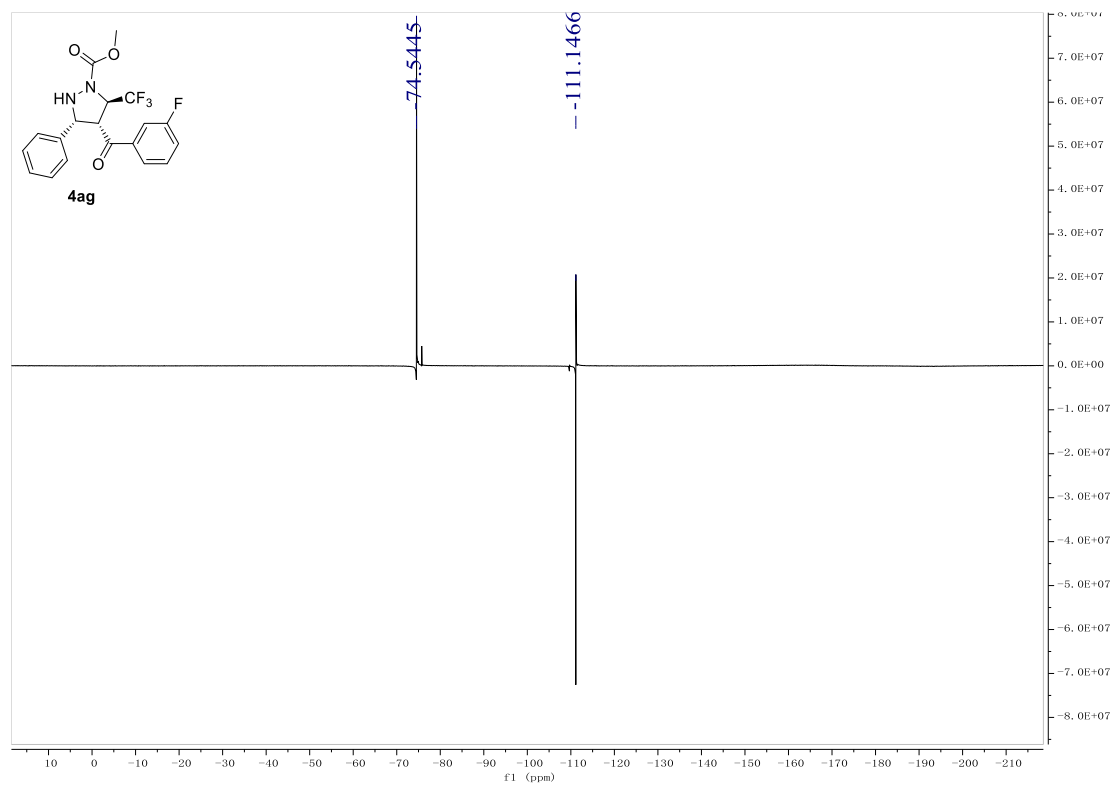

**<sup>1</sup>H NMR of 4ah (600 MHz, CDCl<sub>3</sub>)**

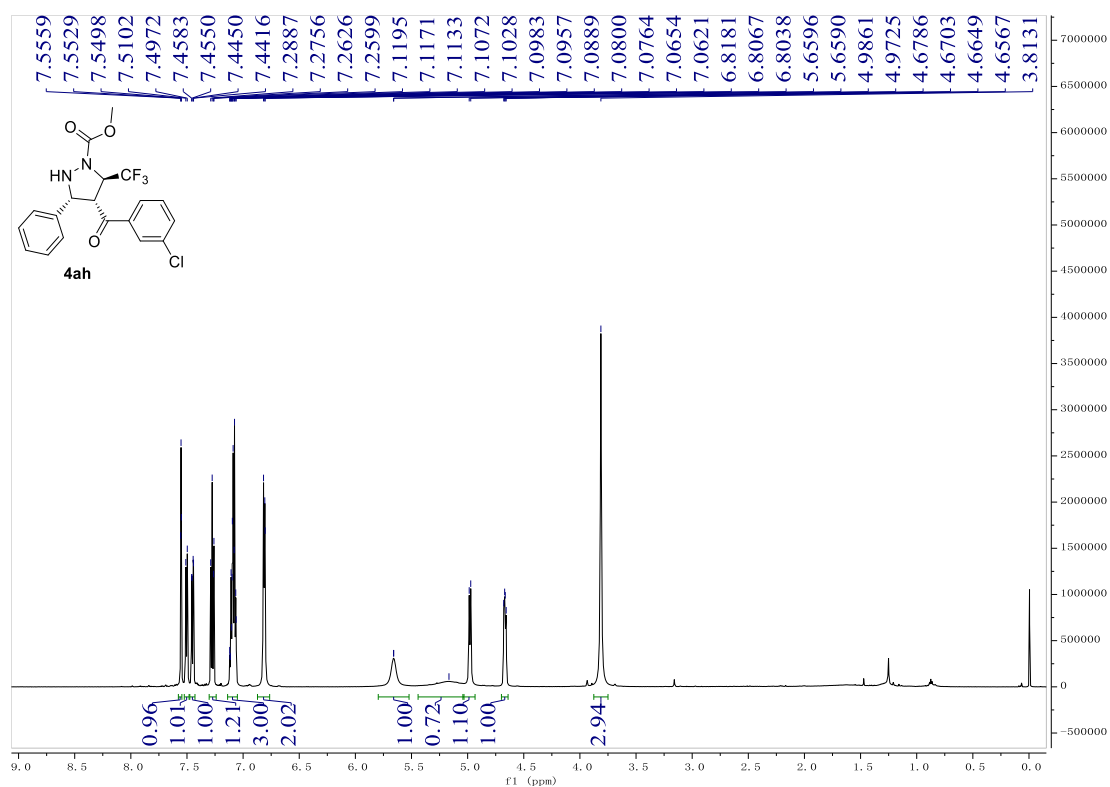

**<sup>13</sup>C{<sup>1</sup>H} NMR of 4ah (150 MHz, CDCl<sub>3</sub>)**

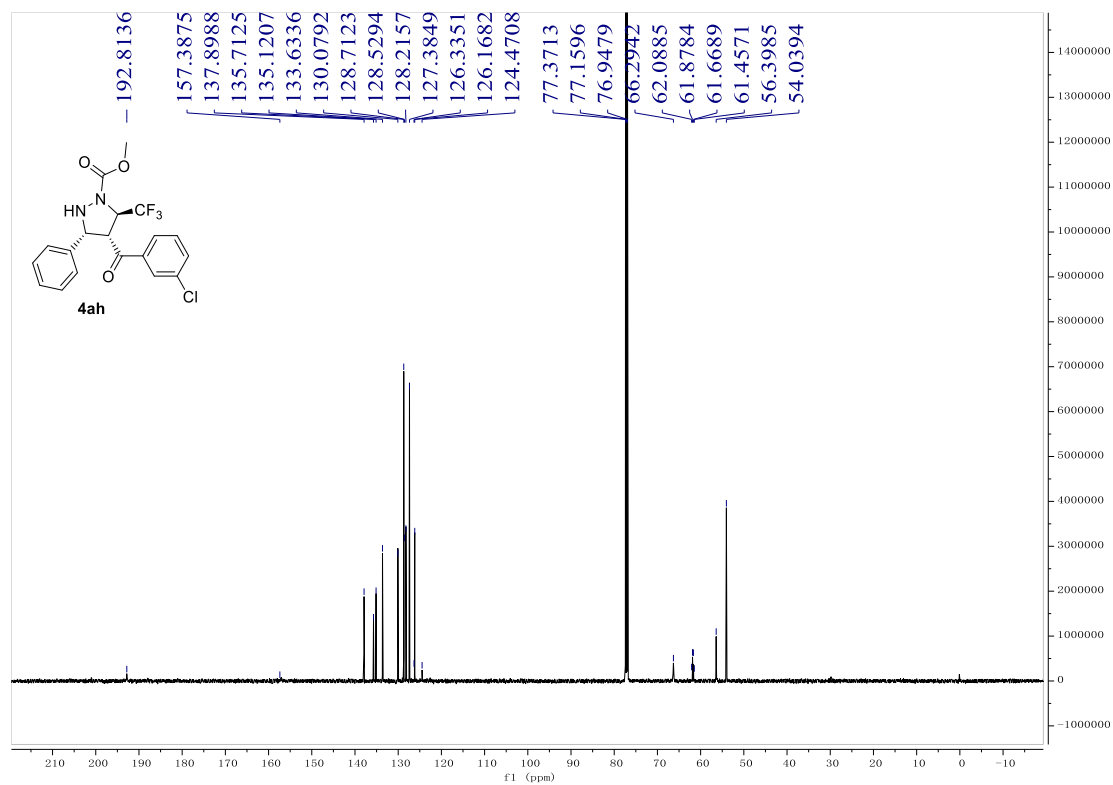

**<sup>19</sup>F{<sup>1</sup>H} NMR of 4ah (565 MHz, CDCl<sub>3</sub>)**

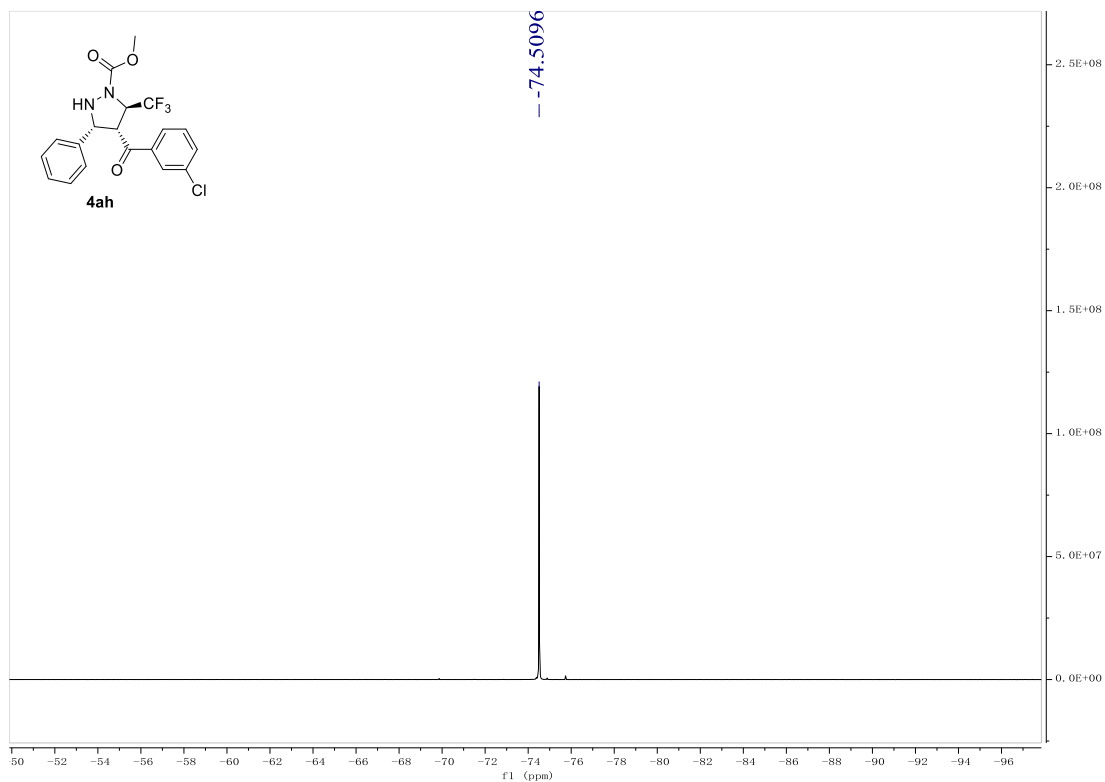

**$^1\text{H}$  NMR of 4ai (400 MHz,  $\text{CDCl}_3$ )**

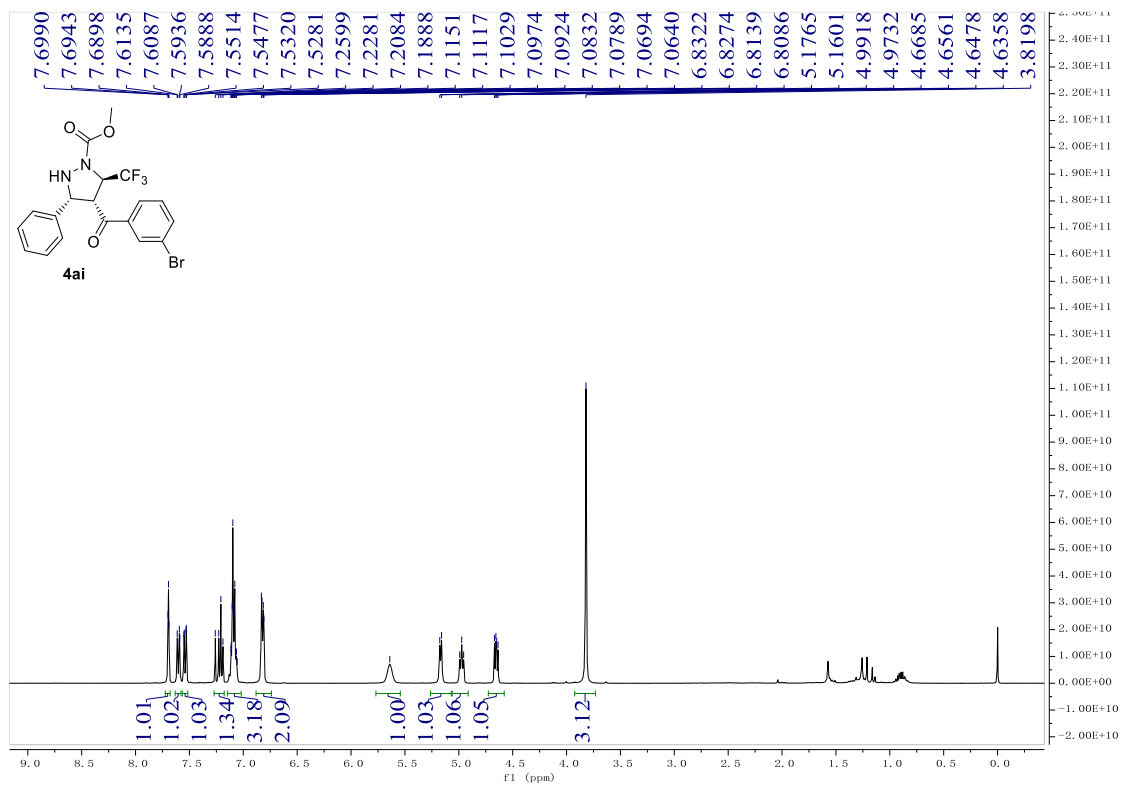

**$^{13}\text{C}\{^1\text{H}\}$  NMR of 4ai (150 MHz,  $\text{CDCl}_3$ )**

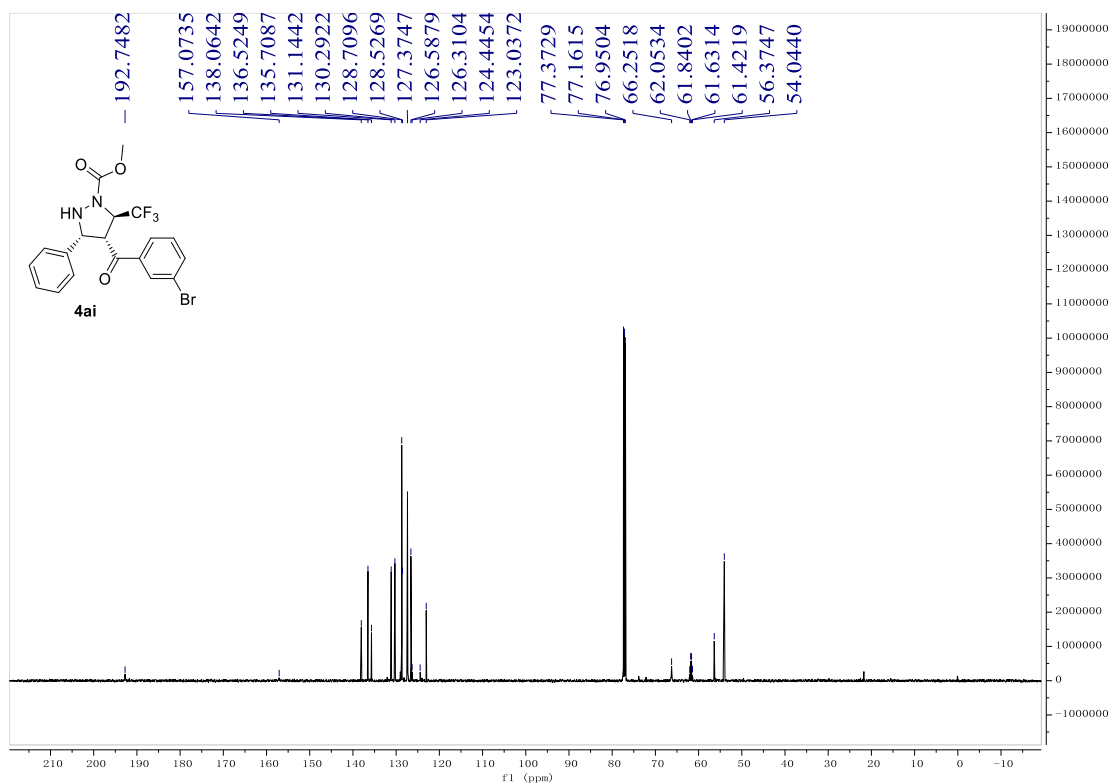

**<sup>19</sup>F{<sup>1</sup>H} NMR of 4ai (565 MHz, CDCl<sub>3</sub>)**

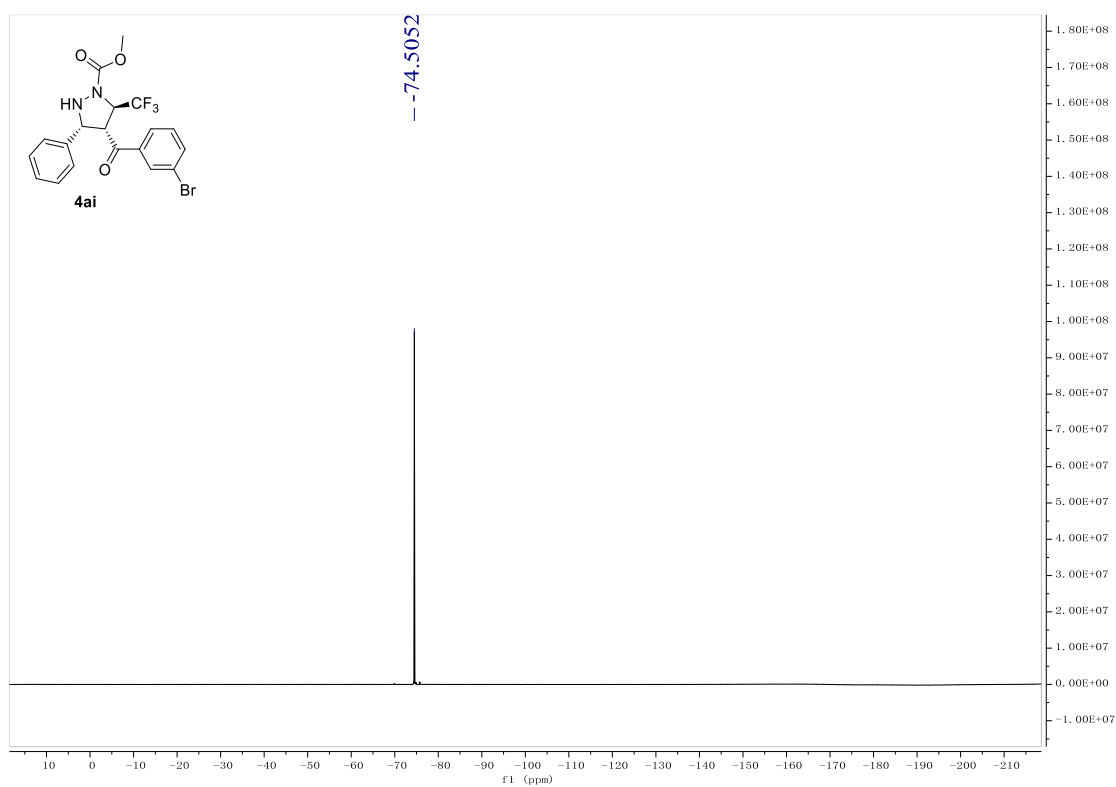

**<sup>1</sup>H NMR of 4aj (400 MHz, CDCl<sub>3</sub>)**

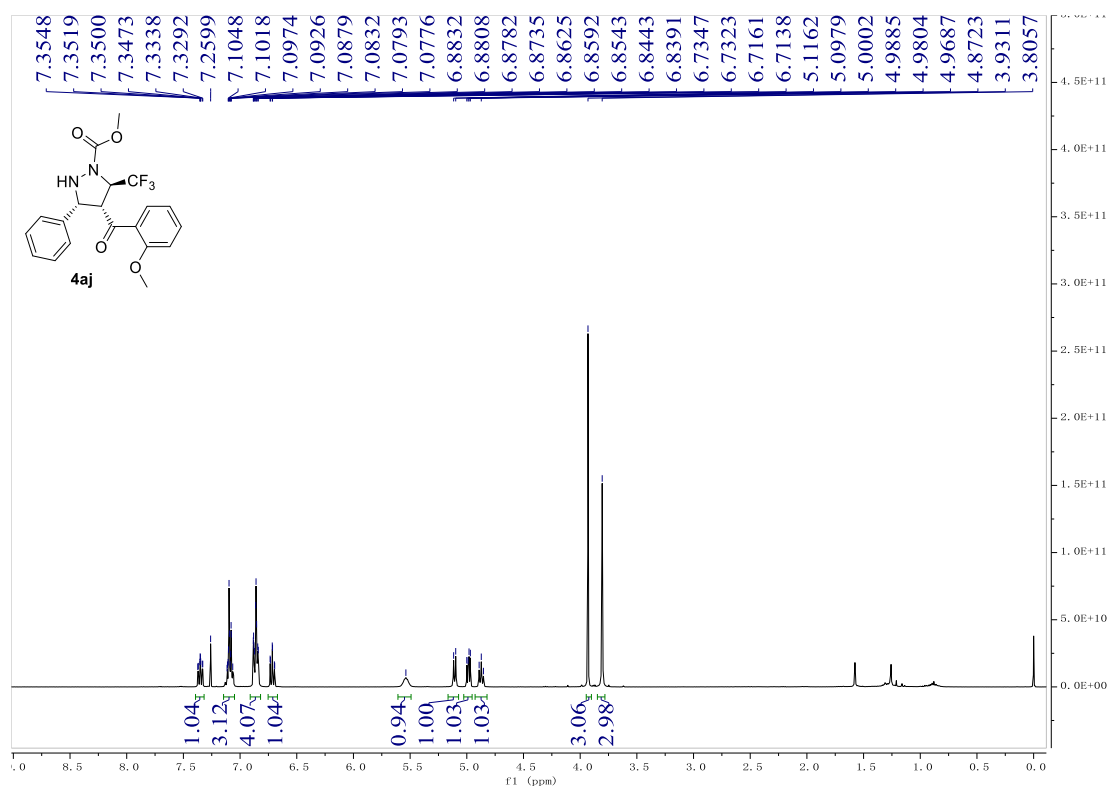

**<sup>13</sup>C{<sup>1</sup>H} NMR of 4aj (100 MHz, CDCl<sub>3</sub>)**

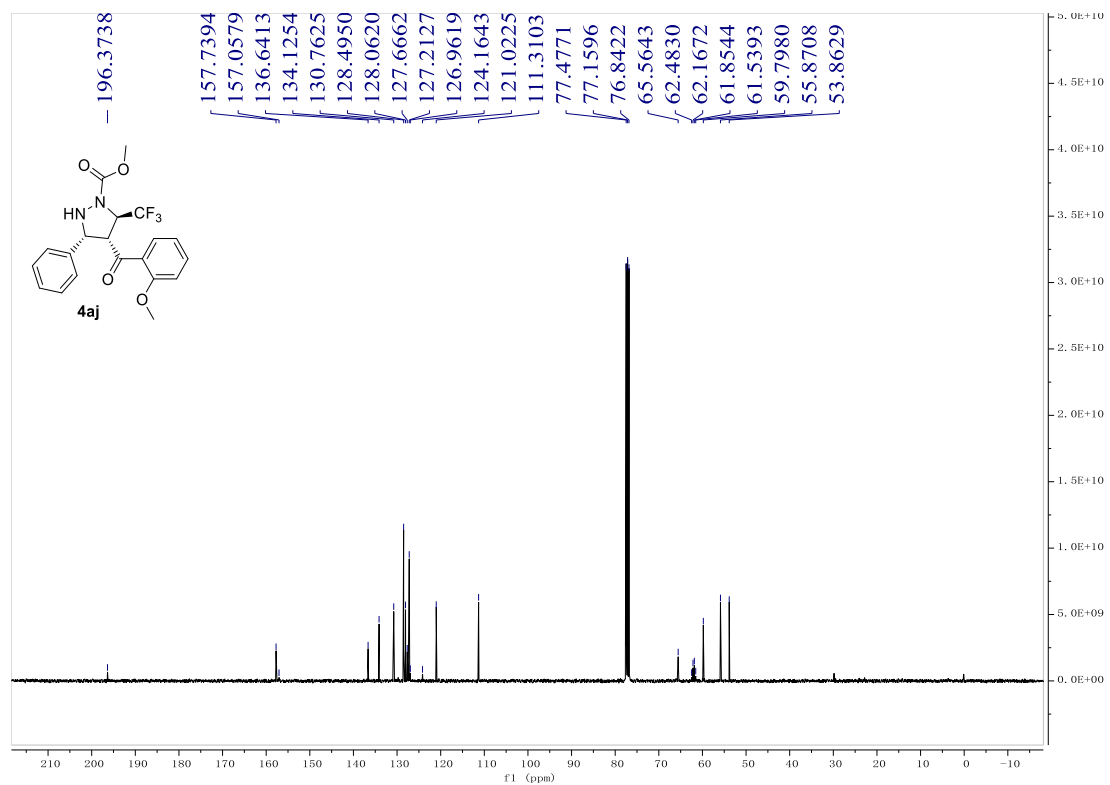

**<sup>19</sup>F{<sup>1</sup>H} NMR of 4aj (376 MHz, CDCl<sub>3</sub>)**

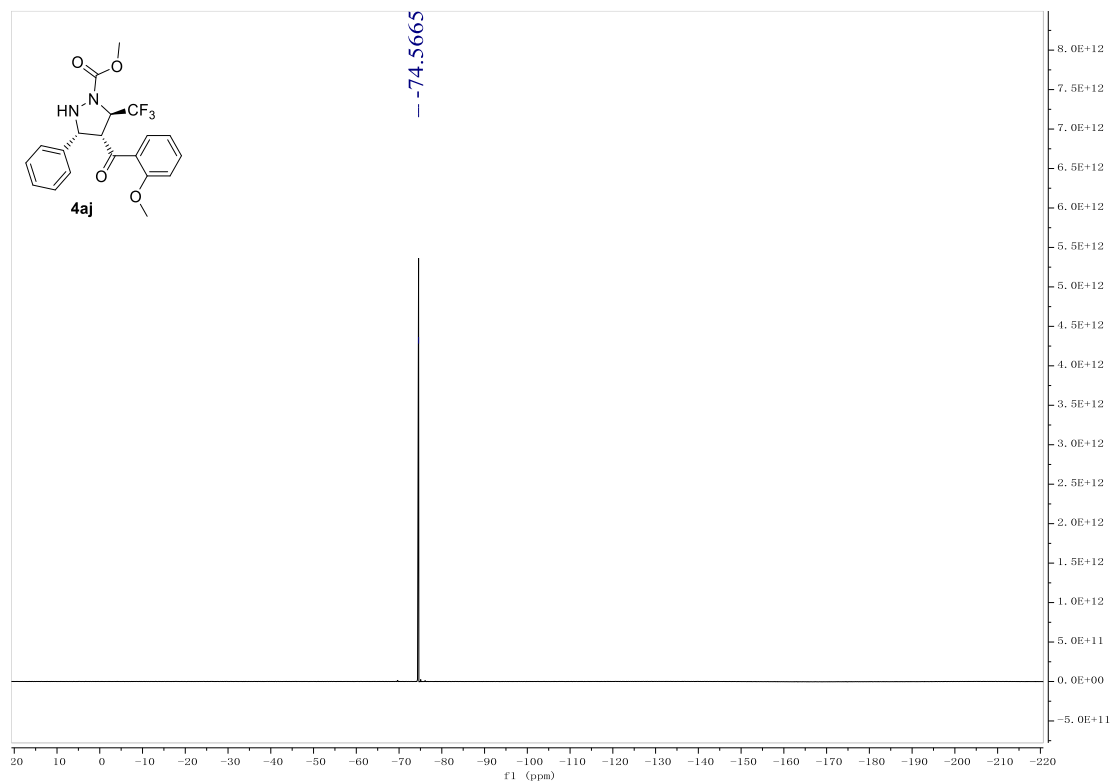

**<sup>1</sup>H NMR of 4ak (400 MHz, CDCl<sub>3</sub>)**

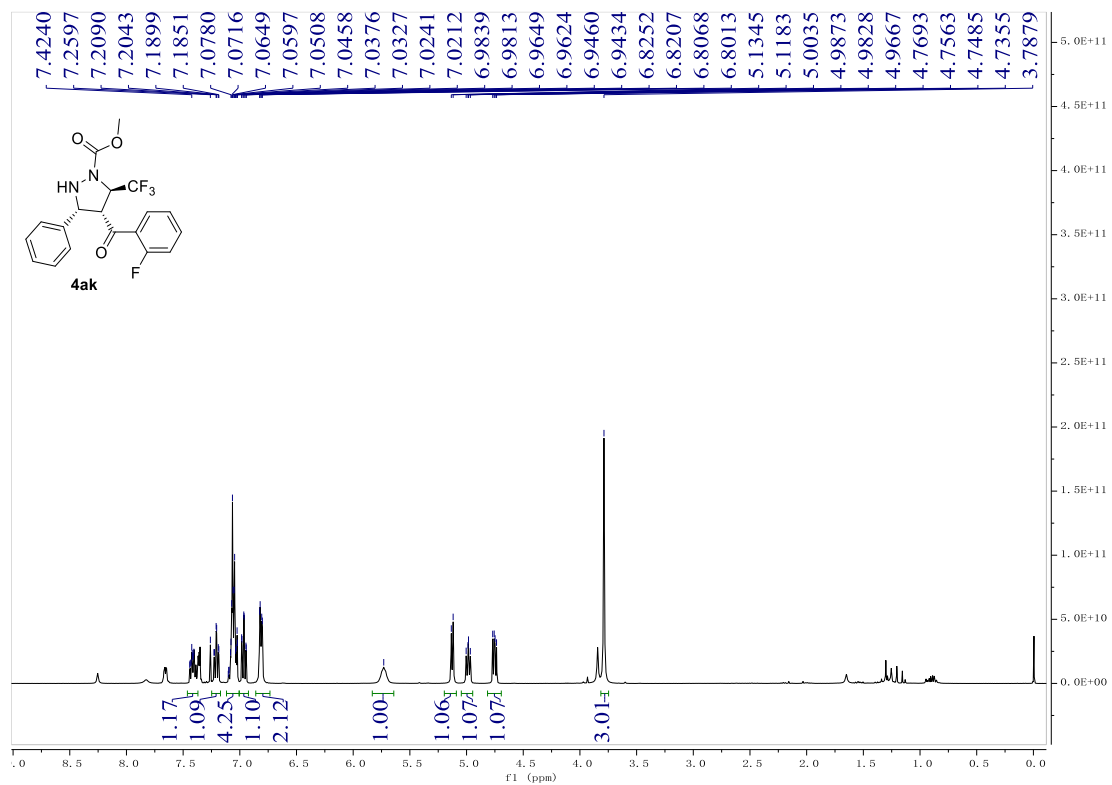

**<sup>13</sup>C{<sup>1</sup>H} NMR of 4ak (100 MHz, CDCl<sub>3</sub>)**

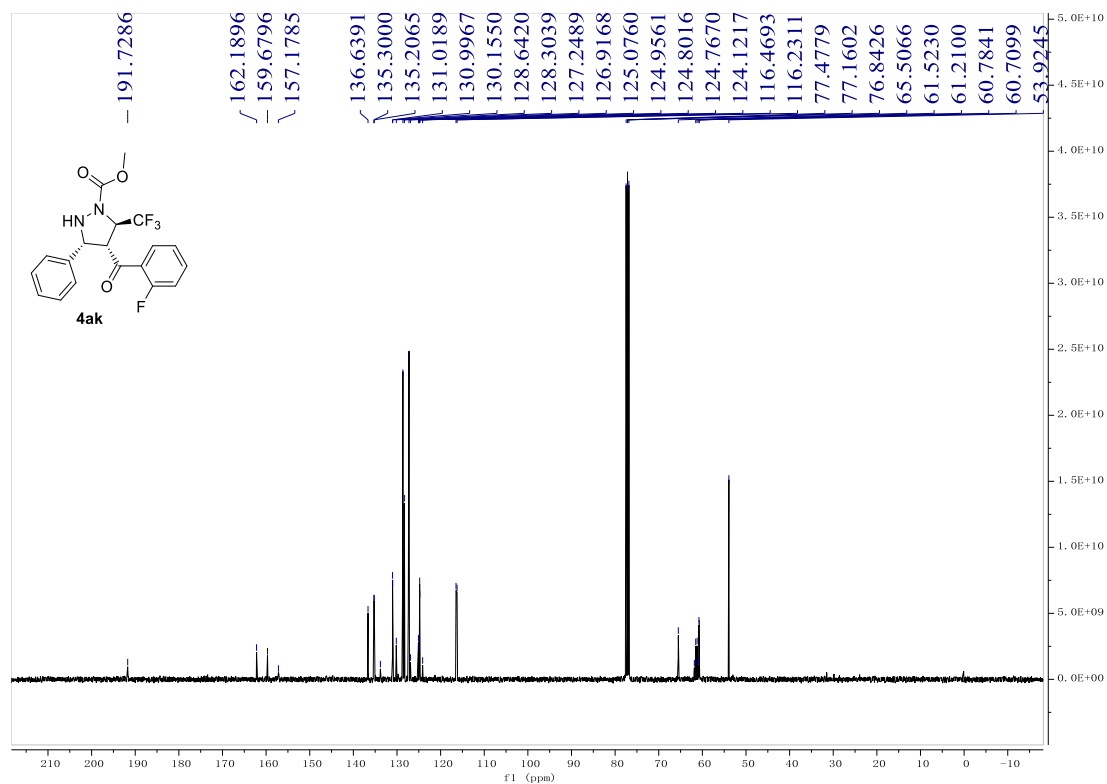

<sup>19</sup>F{<sup>1</sup>H} NMR of 4ak (376 MHz, CDCl<sub>3</sub>)

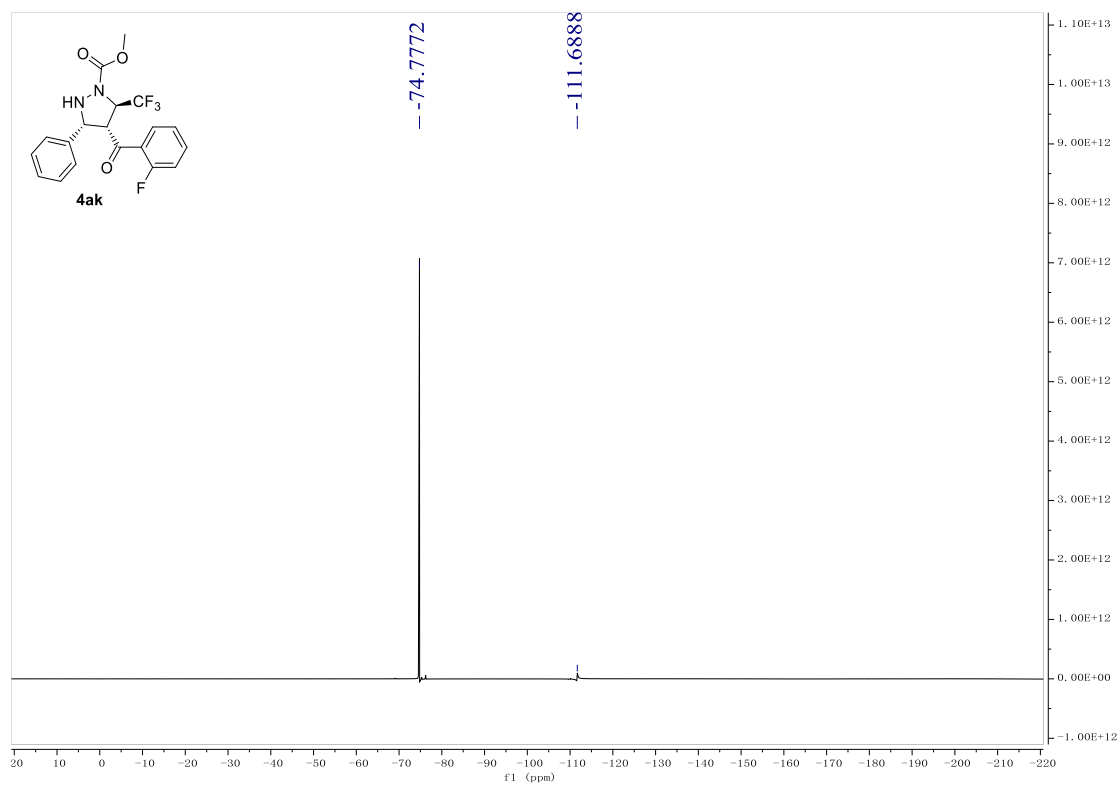

### $^1\text{H}$ NMR of 4al (400 MHz, $\text{CDCl}_3$ )

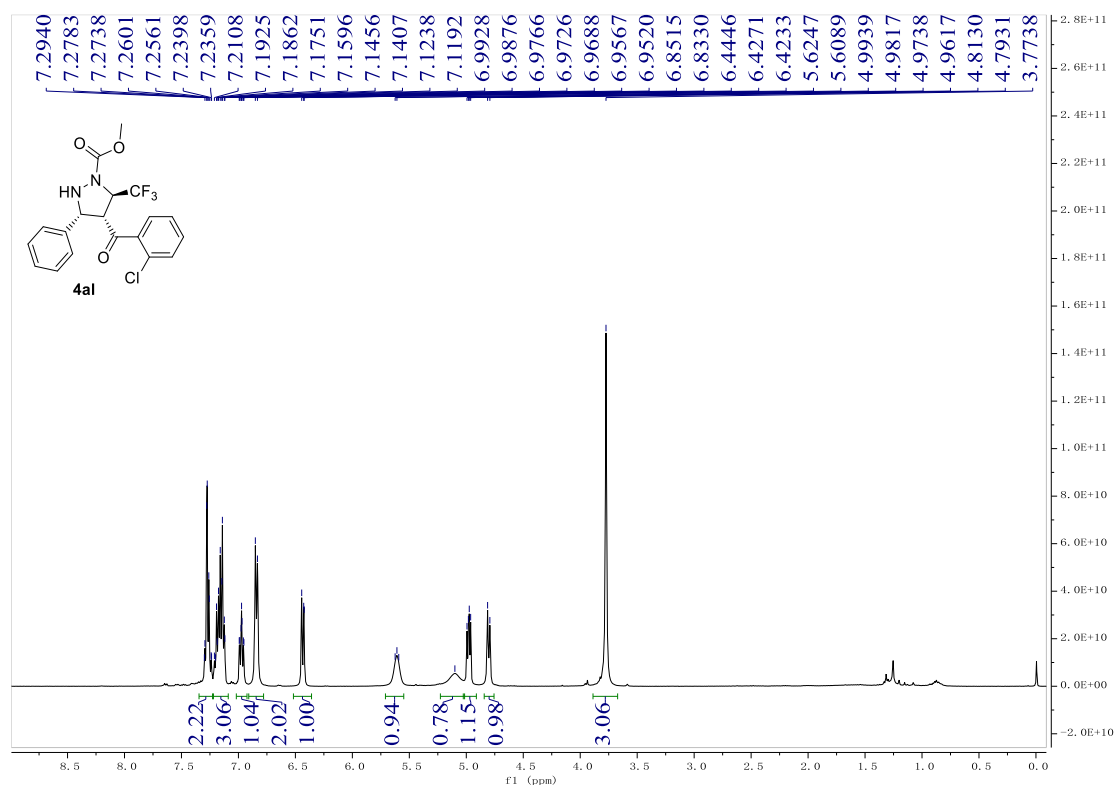

### $^{13}\text{C}\{^1\text{H}\}$ NMR of 4al (100 MHz, $\text{CDCl}_3$ )

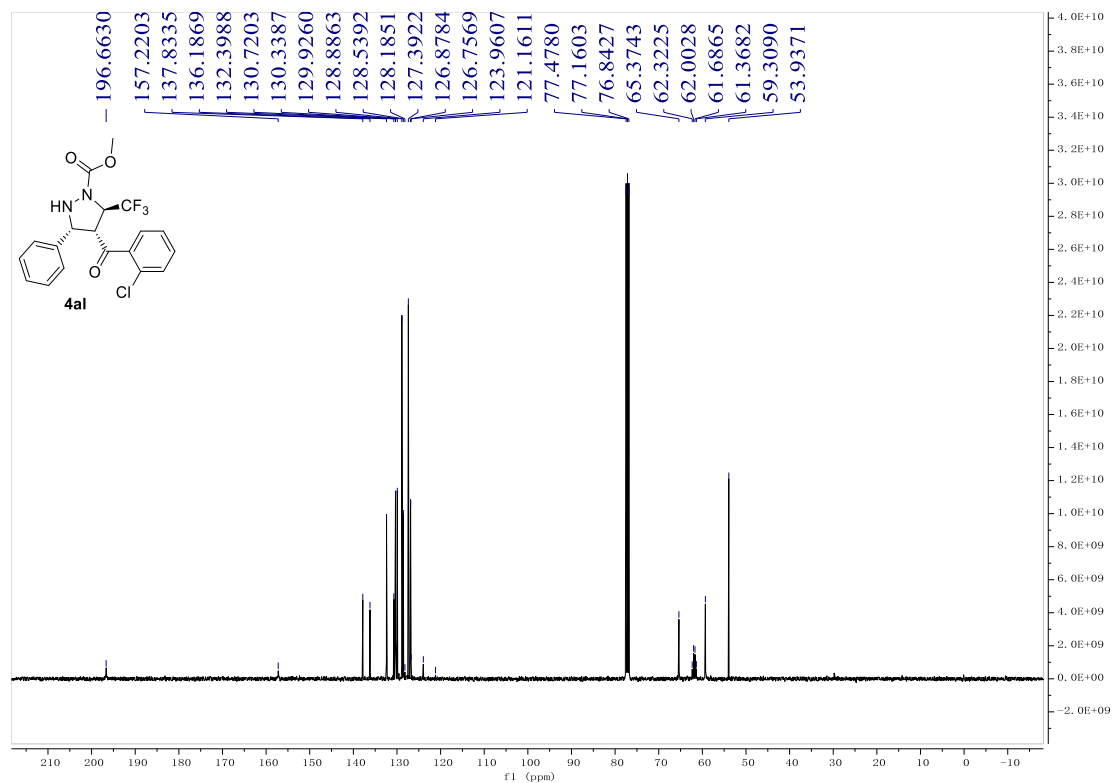



**$^{19}\text{F}\{^1\text{H}\}$  NMR of 4al (376 MHz,  $\text{CDCl}_3$ )**

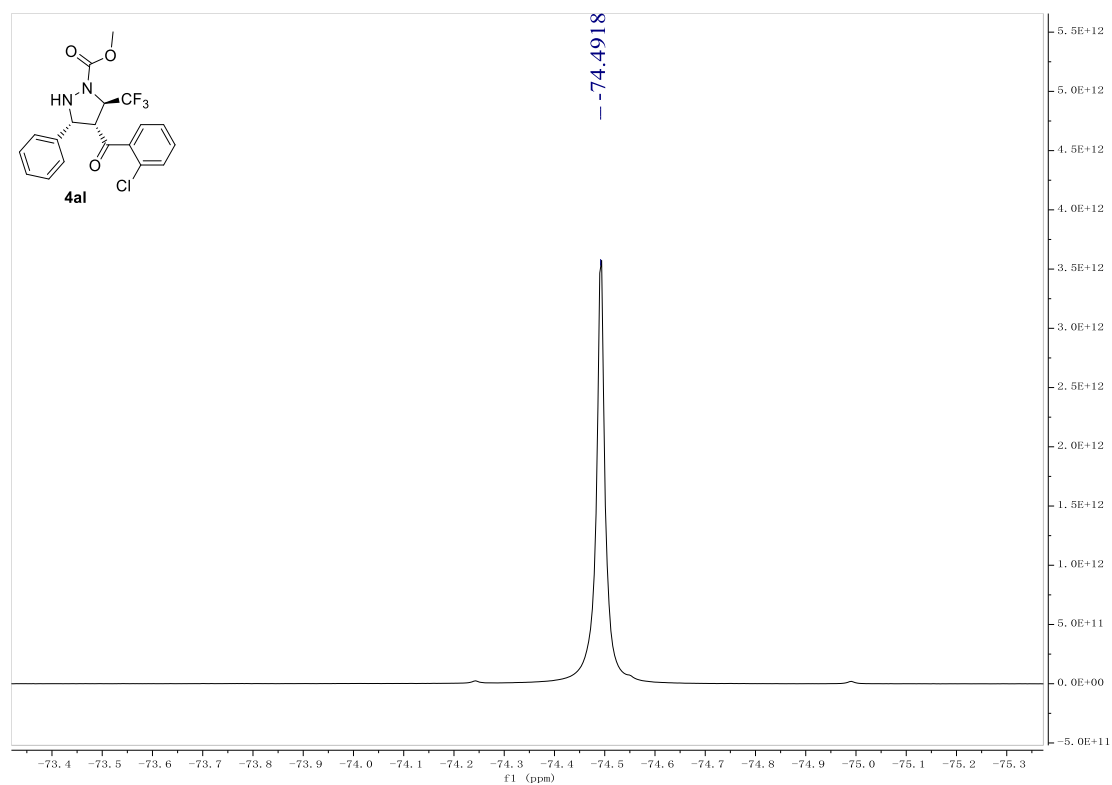

**$^1\text{H}$  NMR of 4am (600 MHz,  $\text{CDCl}_3$ )**

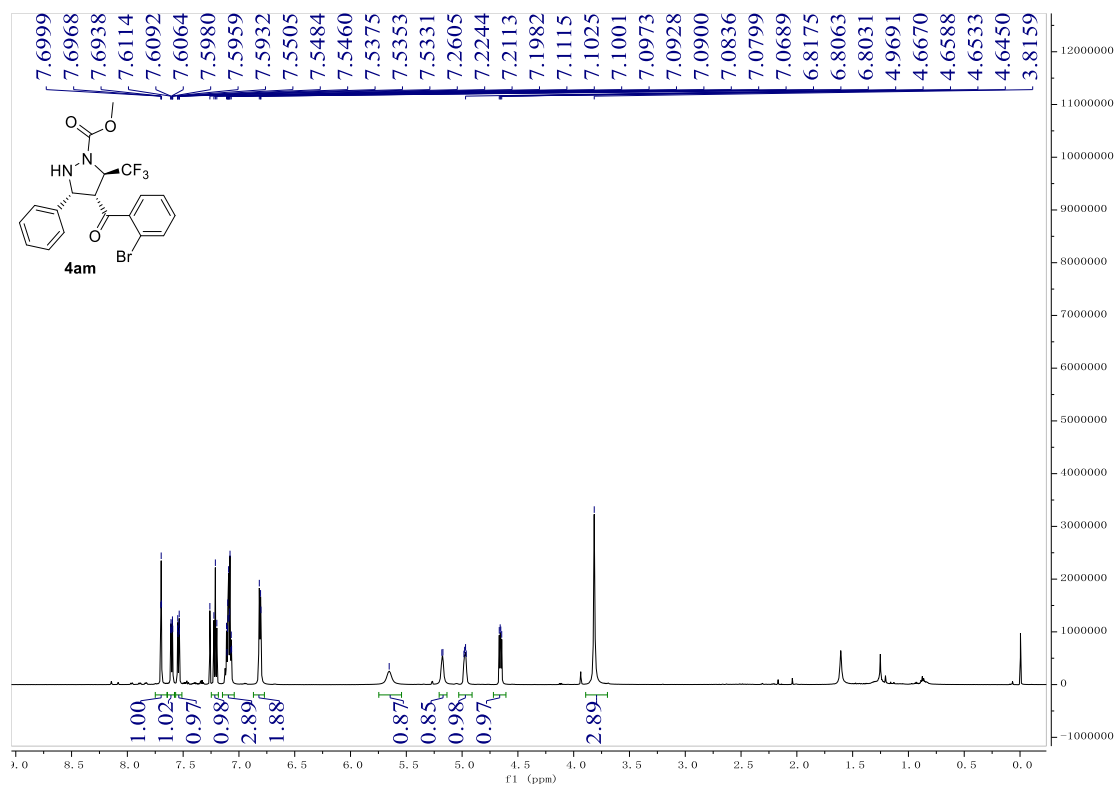

**$^{13}\text{C}\{^1\text{H}\}$  NMR of 4am (150 MHz,  $\text{CDCl}_3$ )**

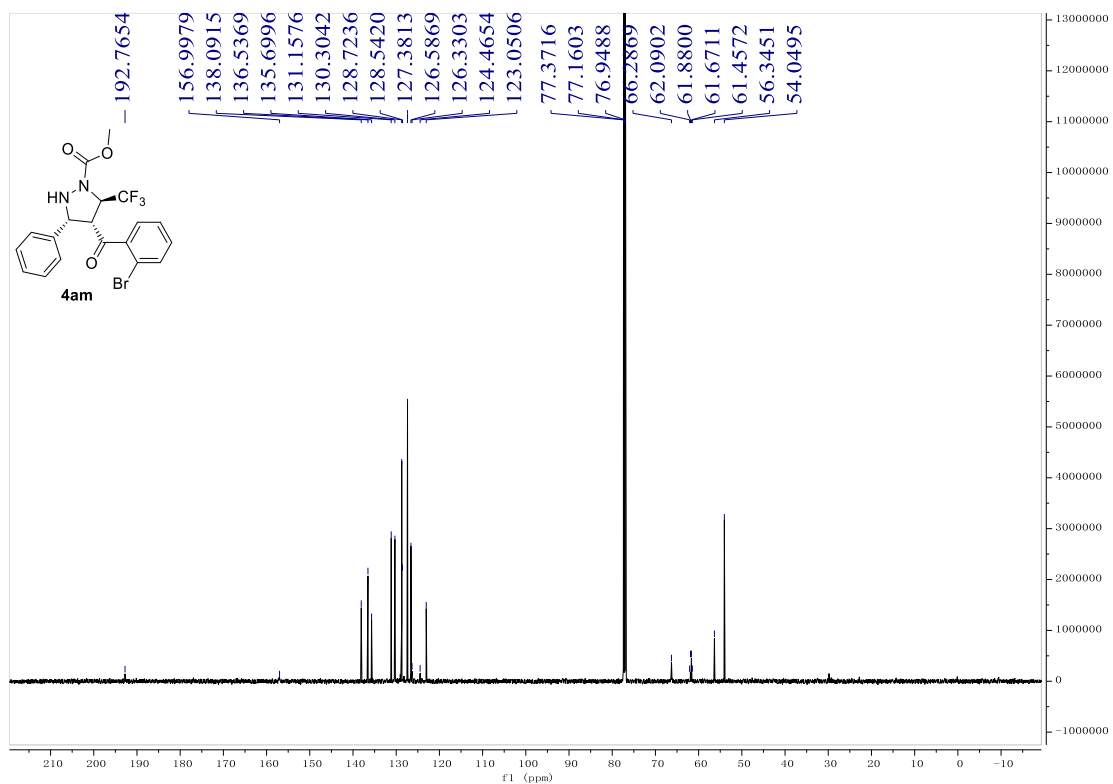

**<sup>19</sup>F{<sup>1</sup>H} NMR of 4am (565 MHz, CDCl<sub>3</sub>)**

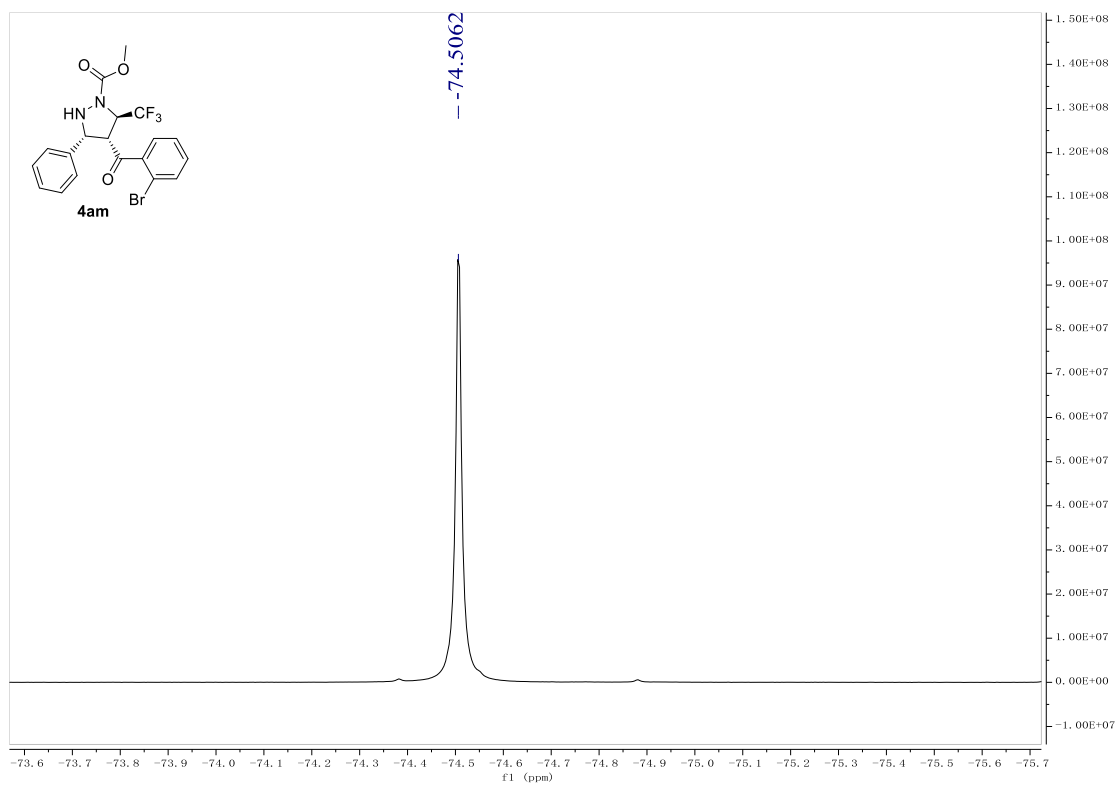

**<sup>1</sup>H NMR of 4an (600 MHz, CDCl<sub>3</sub>)**

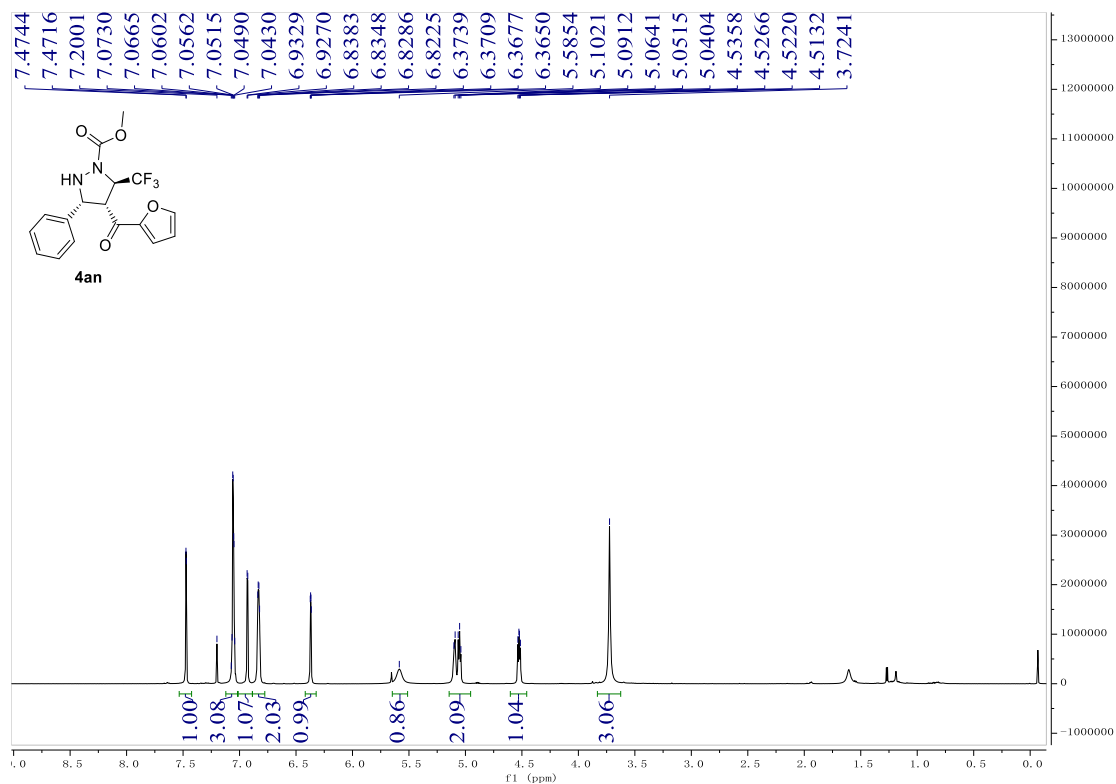

**<sup>13</sup>C{<sup>1</sup>H} NMR of 4an (150 MHz, CDCl<sub>3</sub>)**

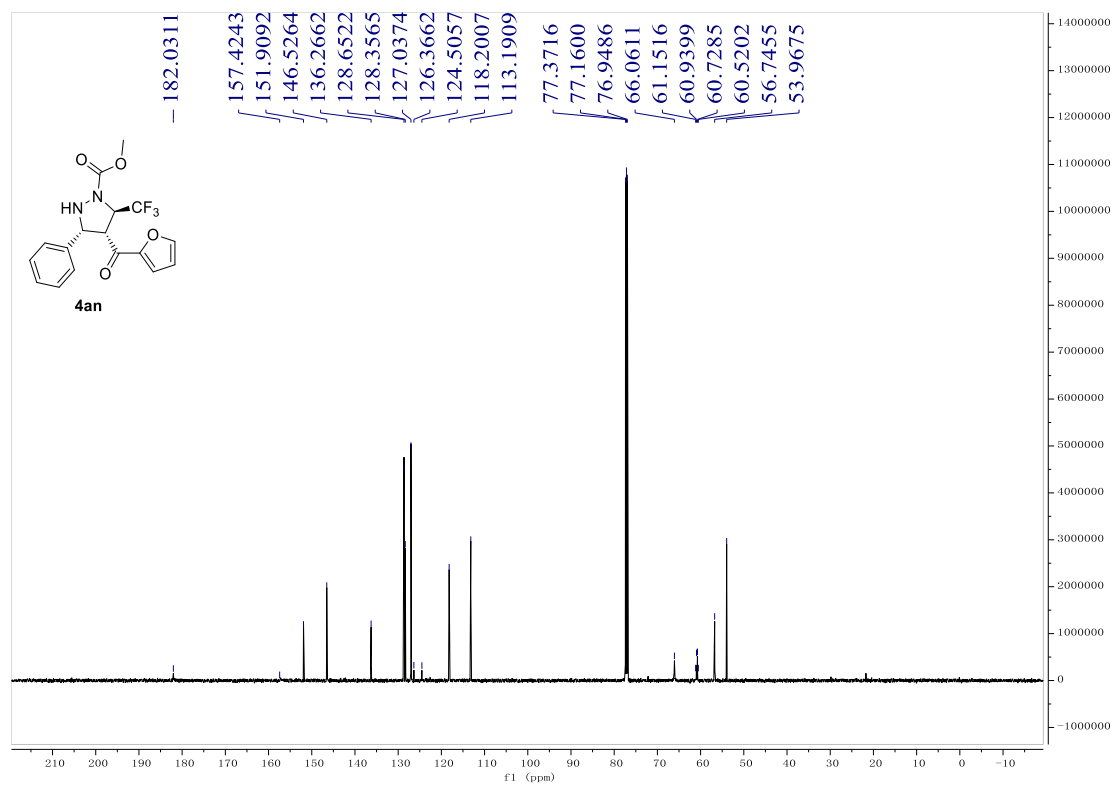

**<sup>19</sup>F{<sup>1</sup>H} NMR of 4an (565 MHz, CDCl<sub>3</sub>)**

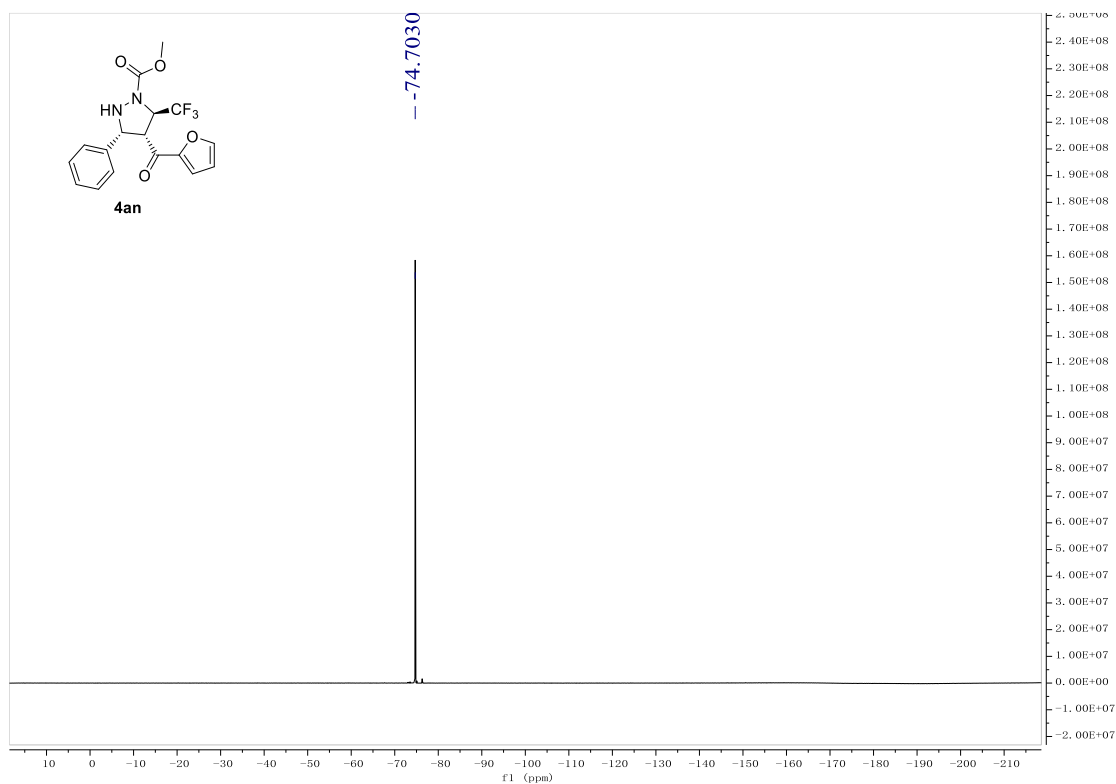

**$^1\text{H}$  NMR of 4ao (600 MHz,  $\text{CDCl}_3$ )**

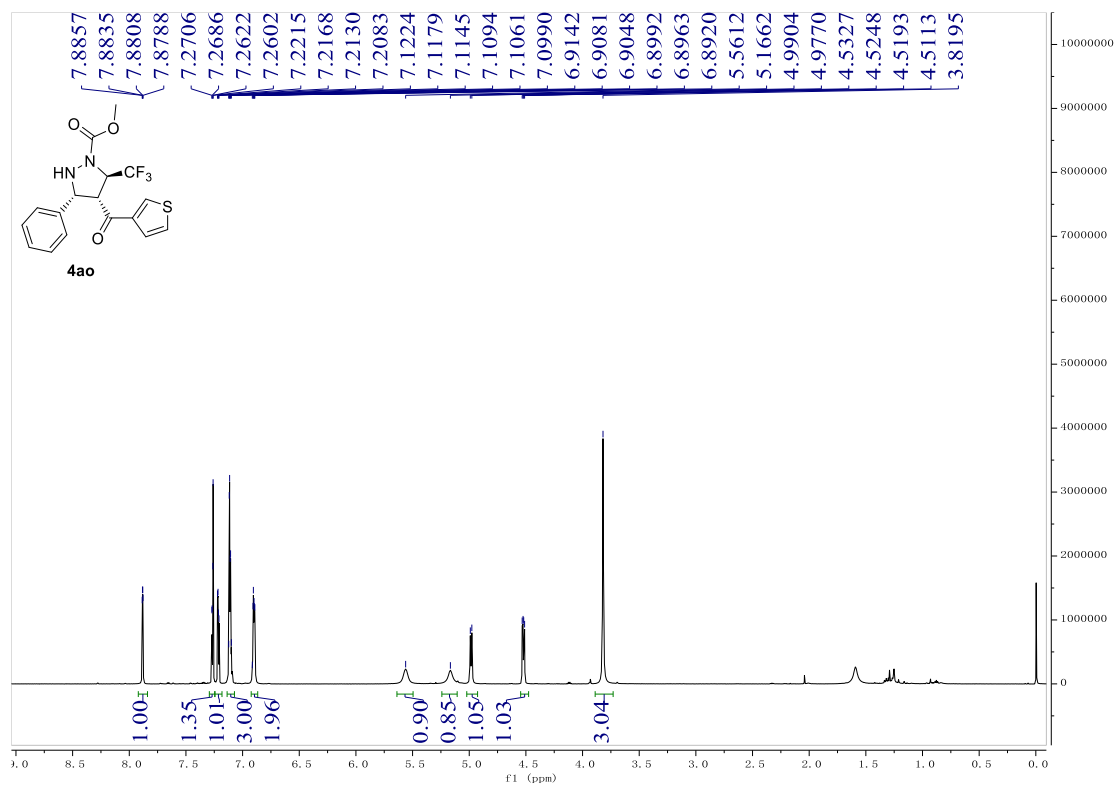

**$^{13}\text{C}\{^1\text{H}\}$  NMR of 4ao (150 MHz,  $\text{CDCl}_3$ )**

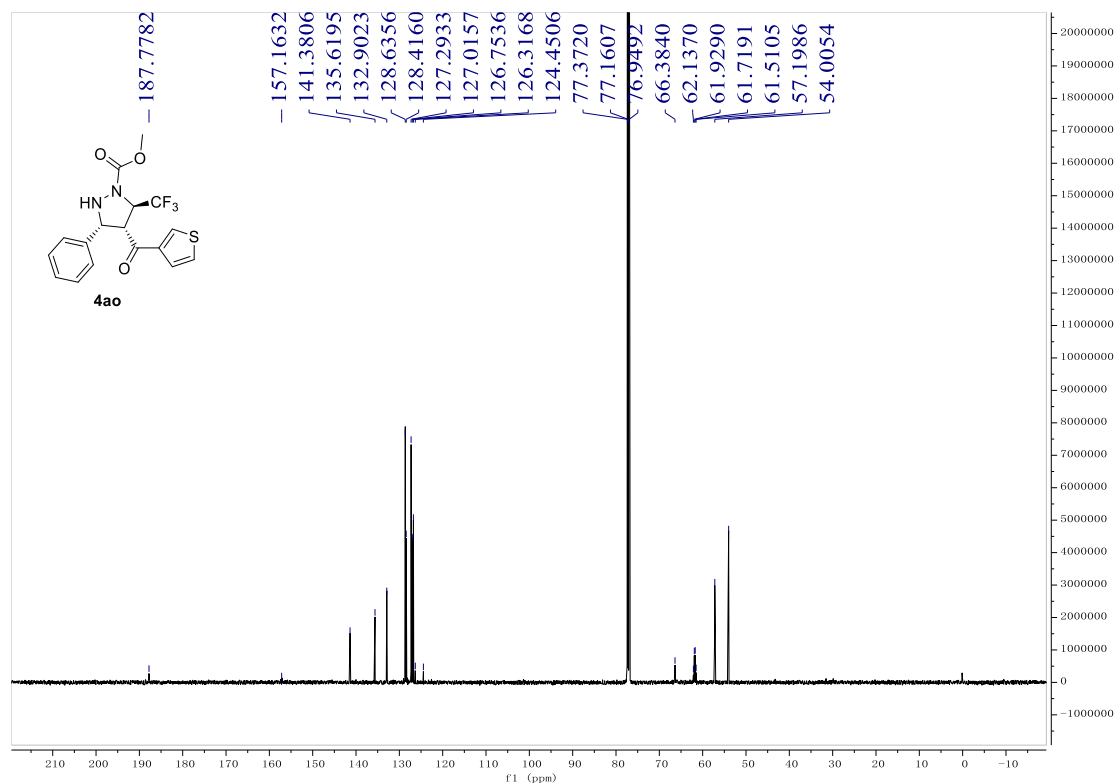

**<sup>19</sup>F{<sup>1</sup>H} NMR of 4ao (565 MHz, CDCl<sub>3</sub>)**

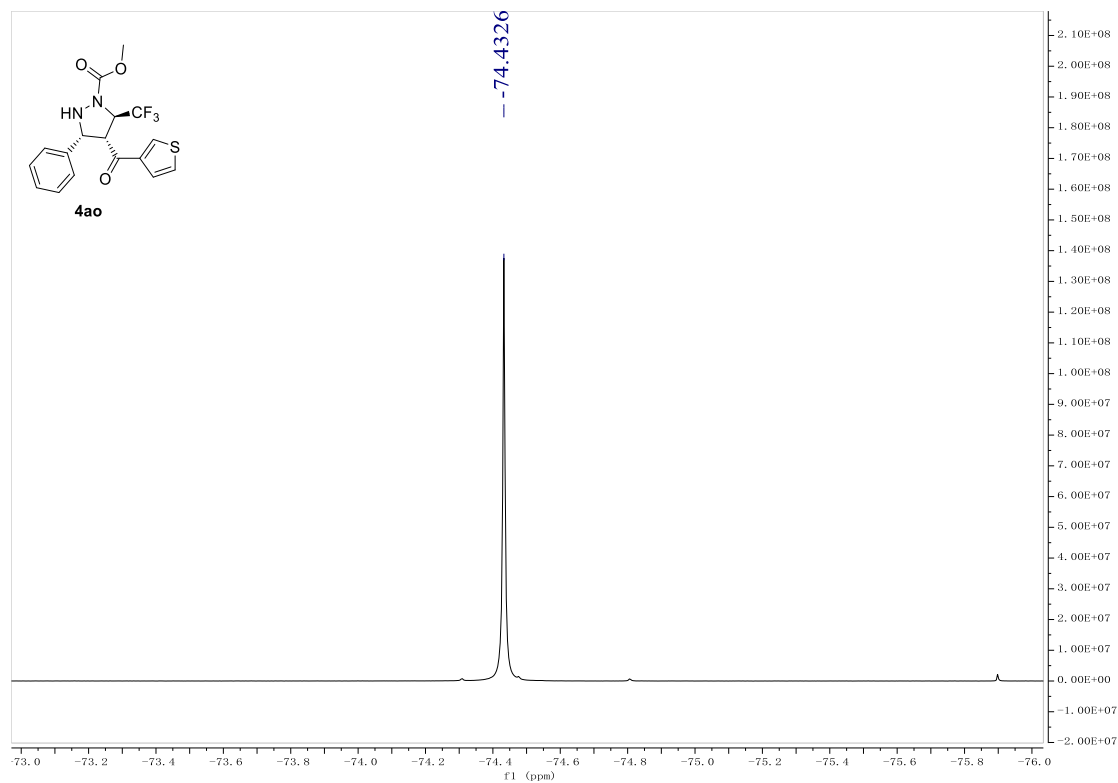

**<sup>1</sup>H NMR of 4ba (400 MHz, CDCl<sub>3</sub>)**

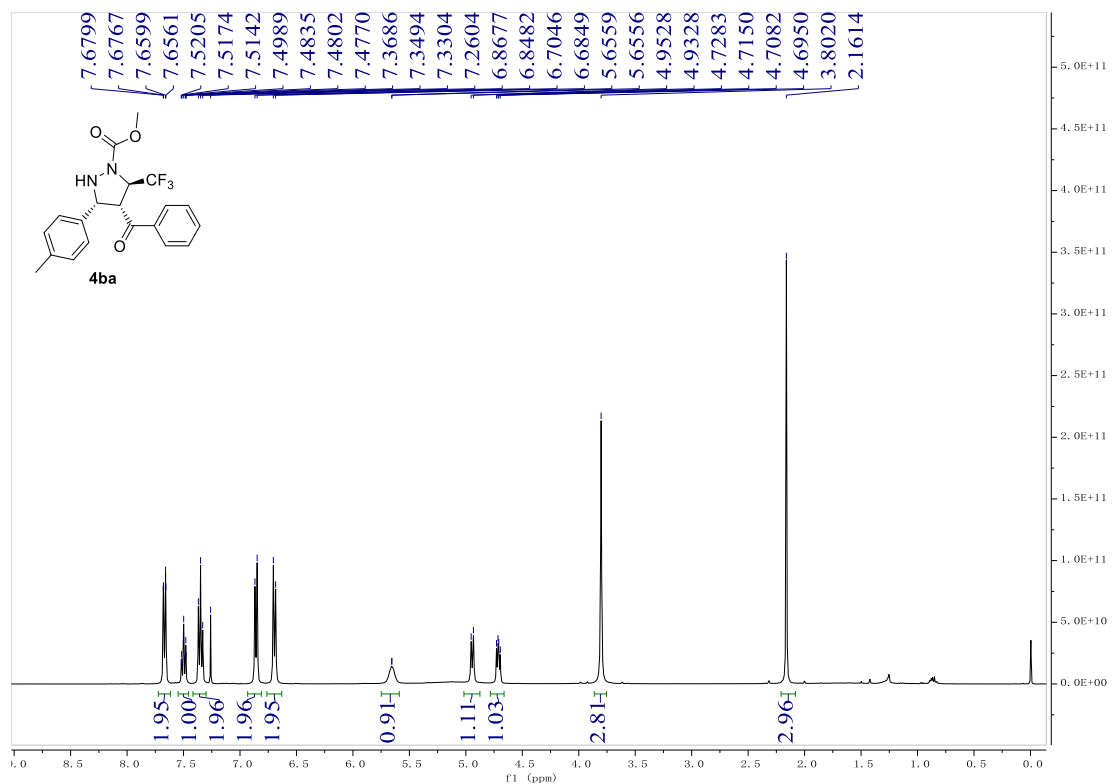

**<sup>13</sup>C{<sup>1</sup>H} NMR of 4ba (100 MHz, CDCl<sub>3</sub>)**

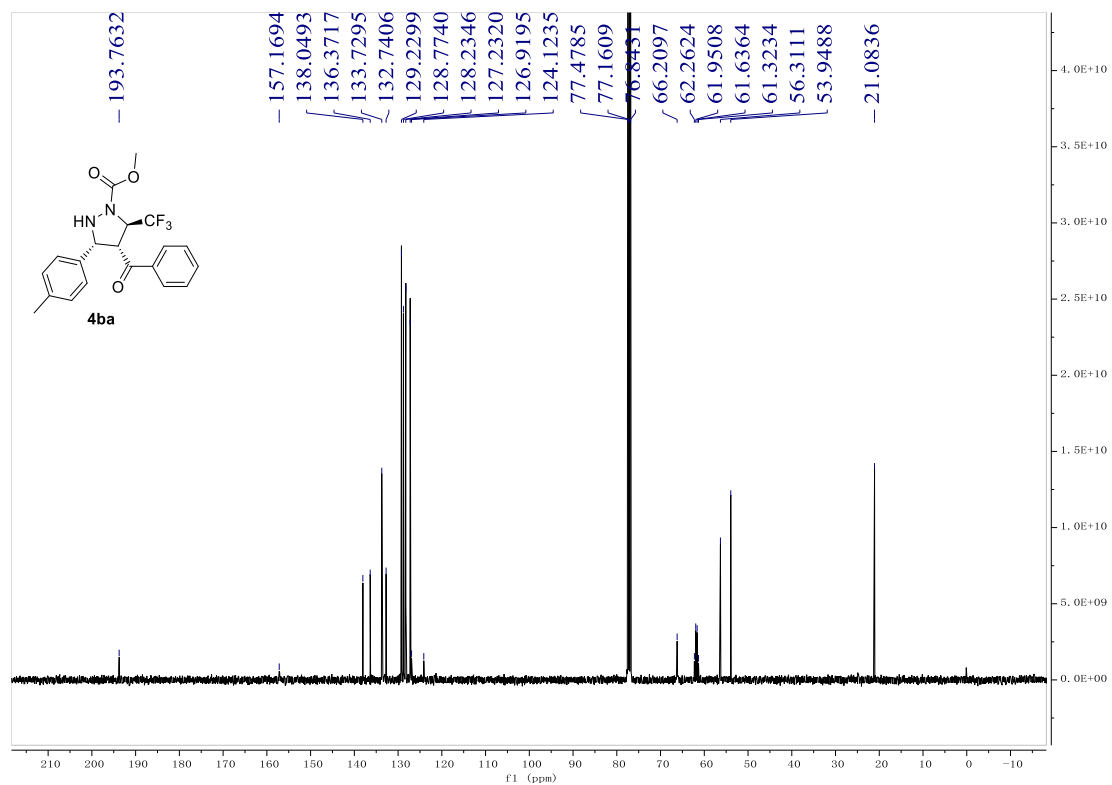

**<sup>19</sup>F{<sup>1</sup>H} NMR of 4ba (376 MHz, CDCl<sub>3</sub>)**

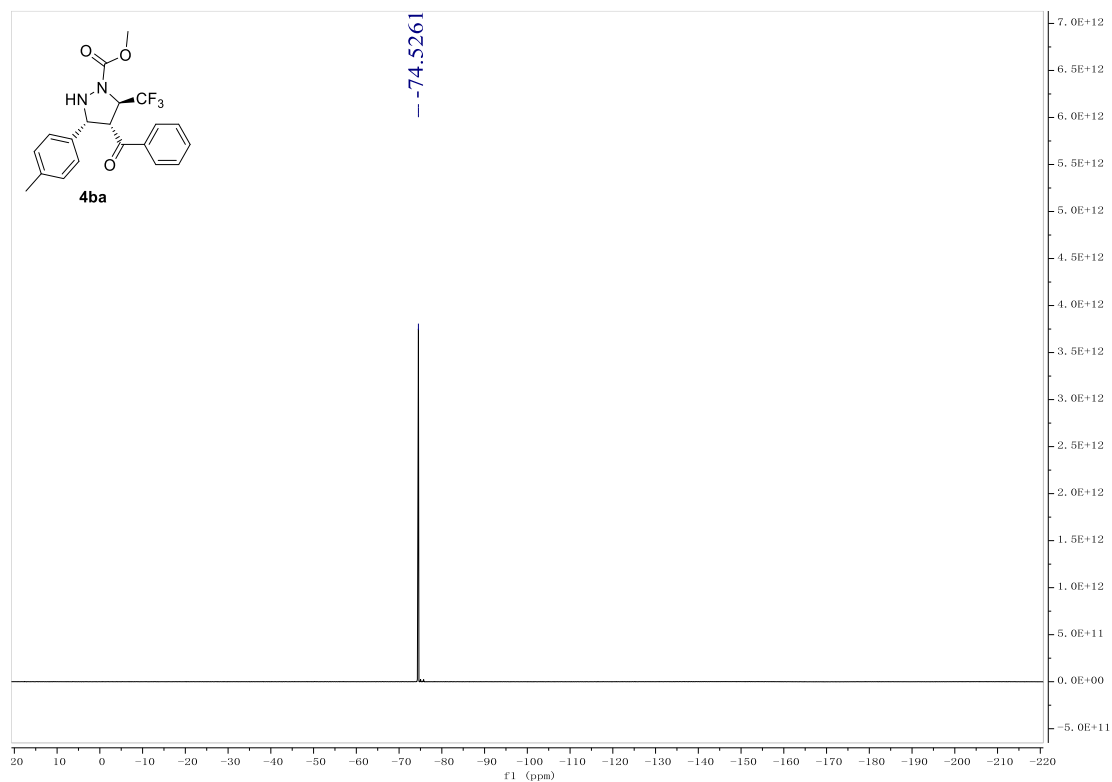

**$^1\text{H}$  NMR of 4ca (400 MHz,  $\text{CDCl}_3$ )**

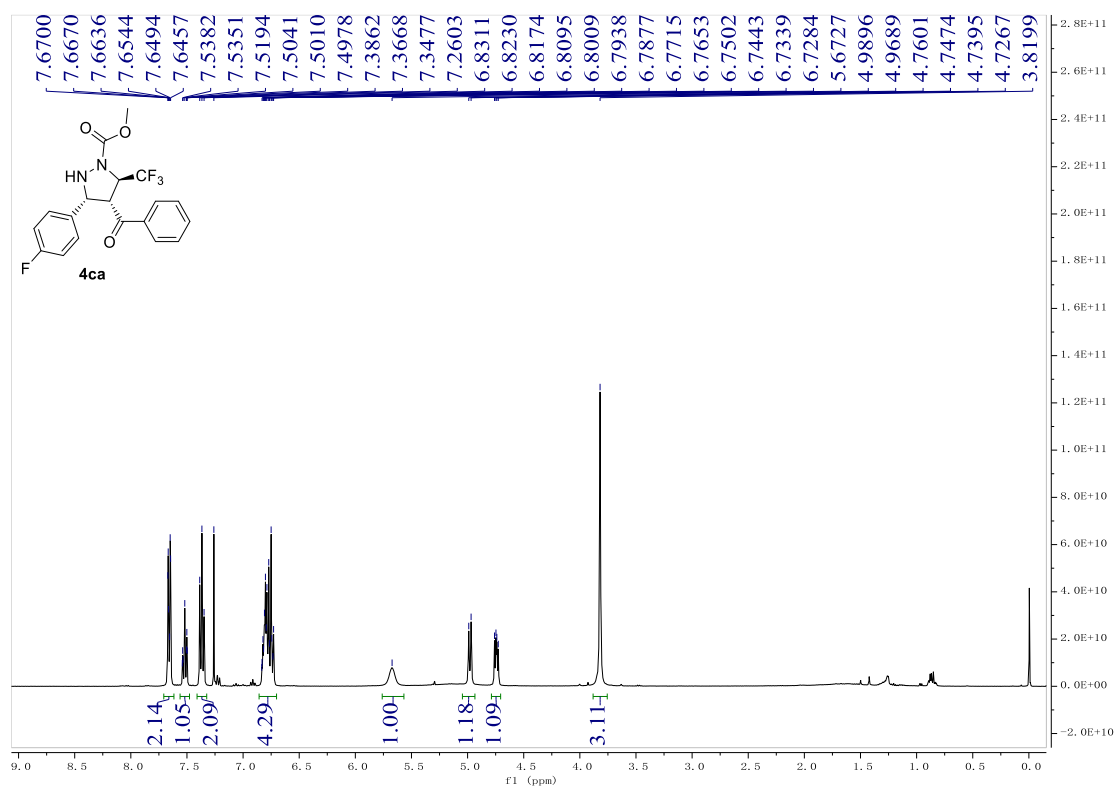

**$^{13}\text{C}\{^1\text{H}\}$  NMR of 4ca (100 MHz,  $\text{CDCl}_3$ )**

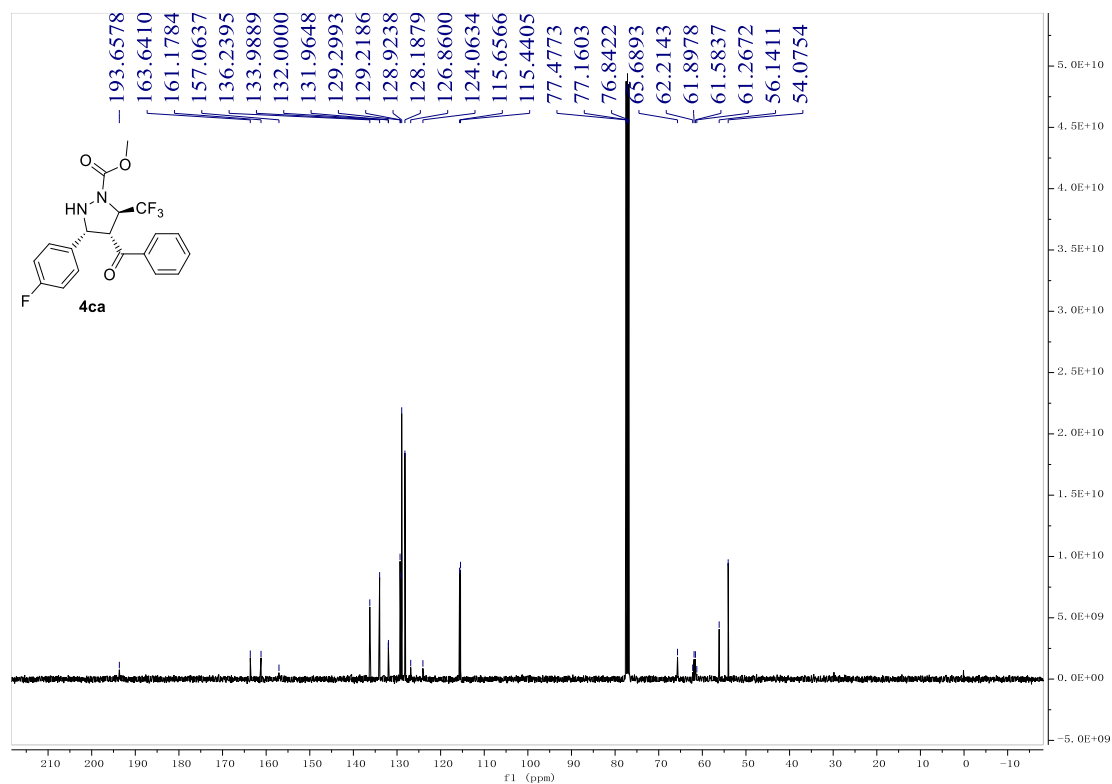

**$^{19}\text{F}\{^1\text{H}\}$  NMR of 4ca (376 MHz,  $\text{CDCl}_3$ )**

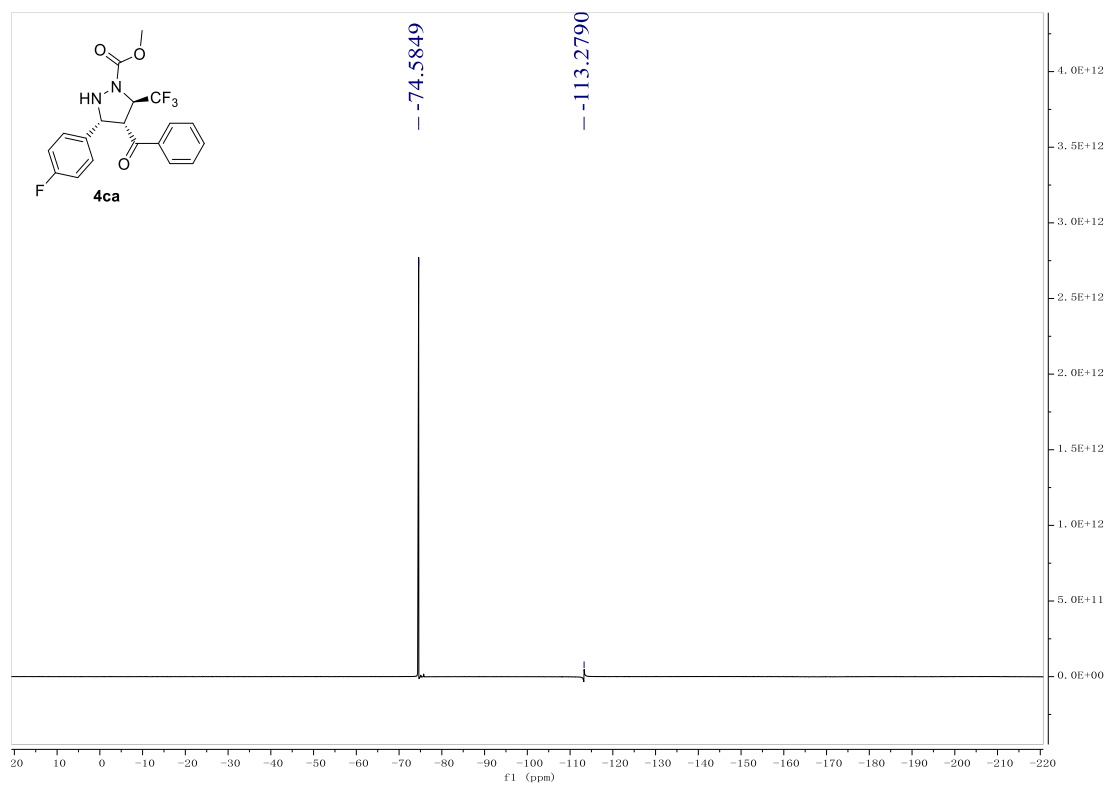



### $^1\text{H}$ NMR of 4da (400 MHz, $\text{CDCl}_3$ )

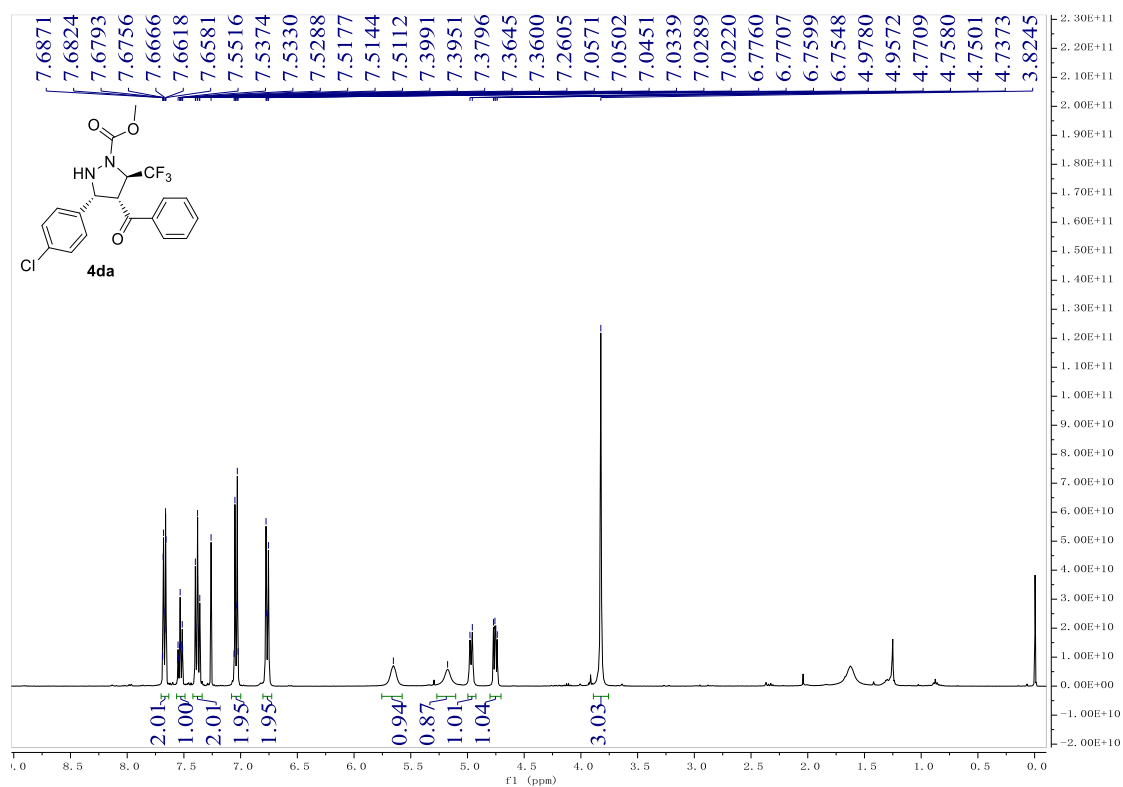

### $^{13}\text{C}\{^1\text{H}\}$ NMR of 4da (100 MHz, $\text{CDCl}_3$ )

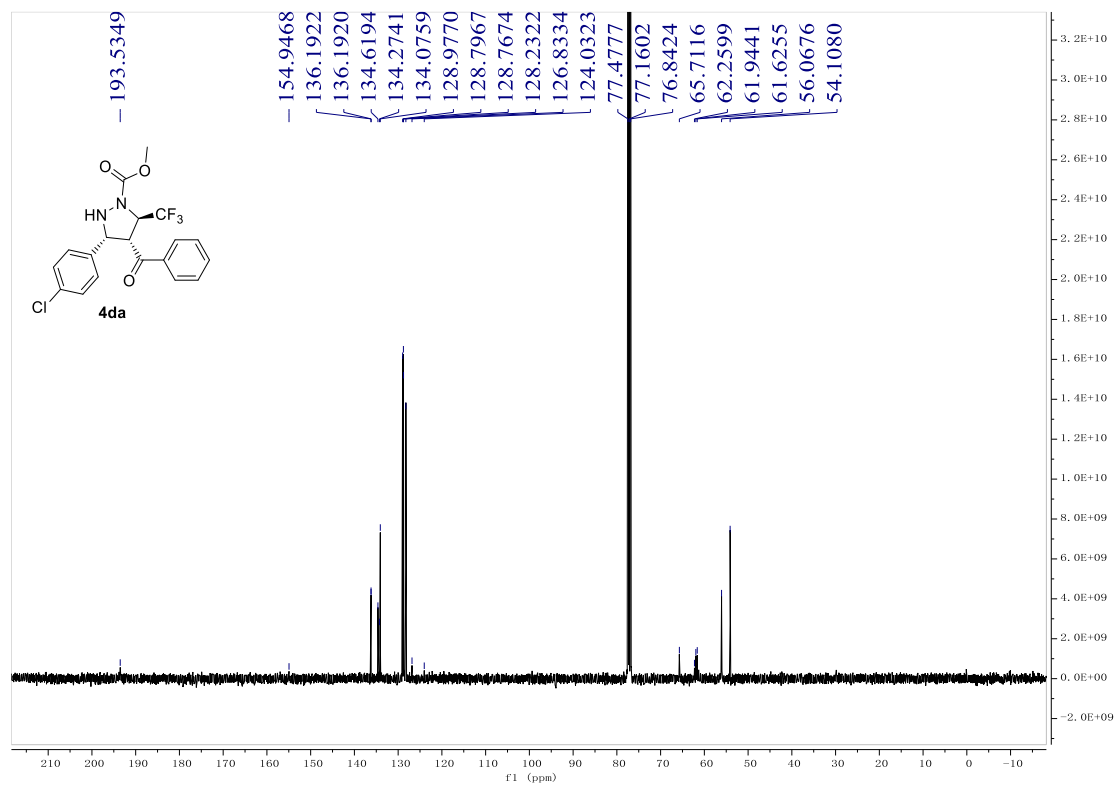

### $^{19}\text{F}\{^1\text{H}\}$ NMR of 4da (376 MHz, $\text{CDCl}_3$ )

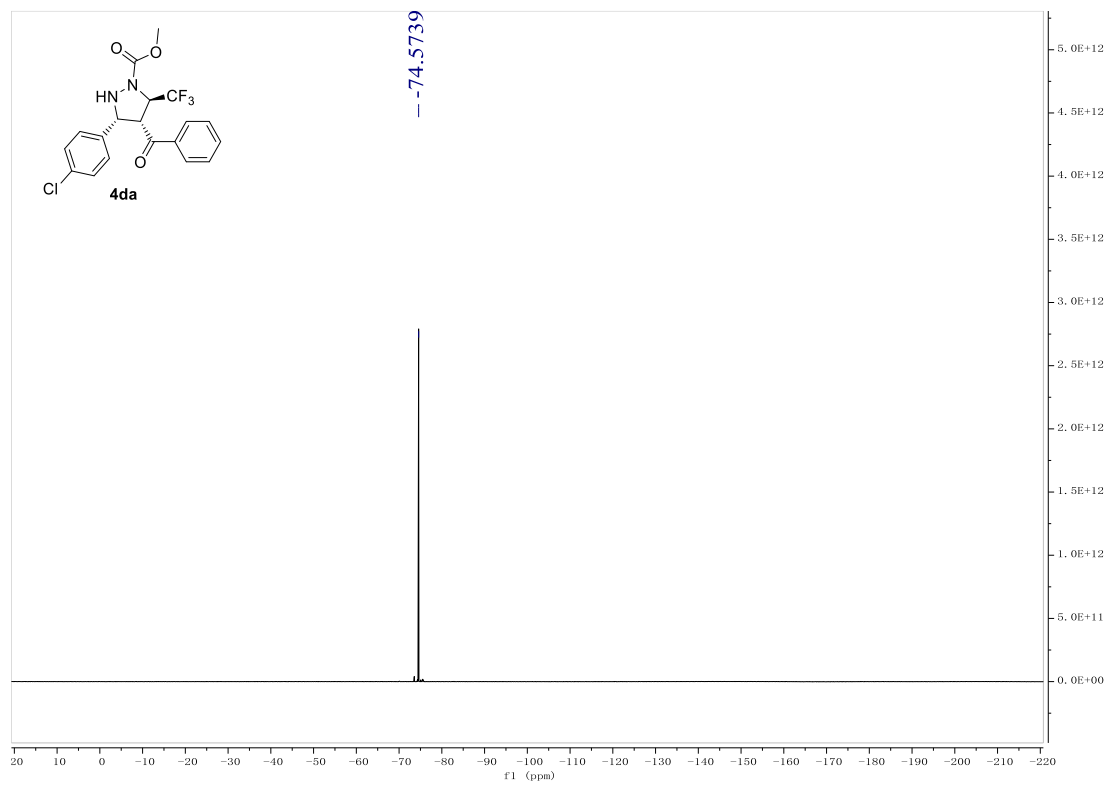

**$^1\text{H}$  NMR of 4ea (600 MHz,  $\text{CDCl}_3$ )**

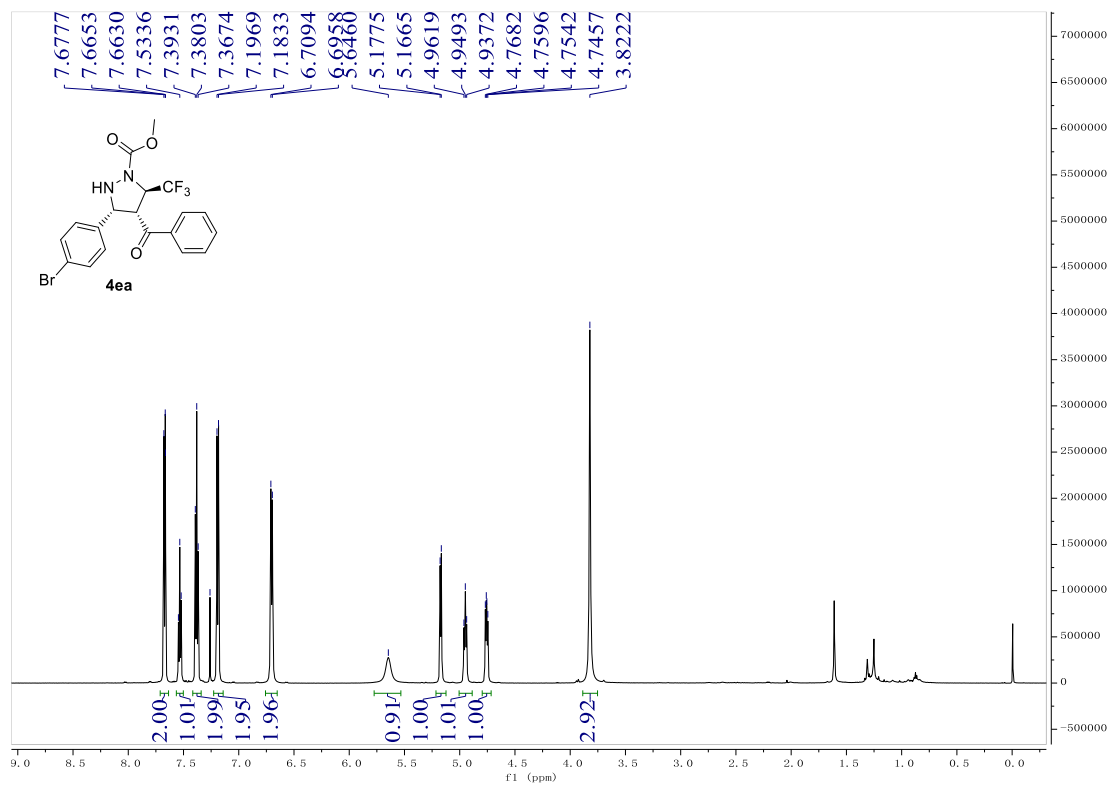

**$^{13}\text{C}\{^1\text{H}\}$  NMR of 4ea (150 MHz,  $\text{CDCl}_3$ )**

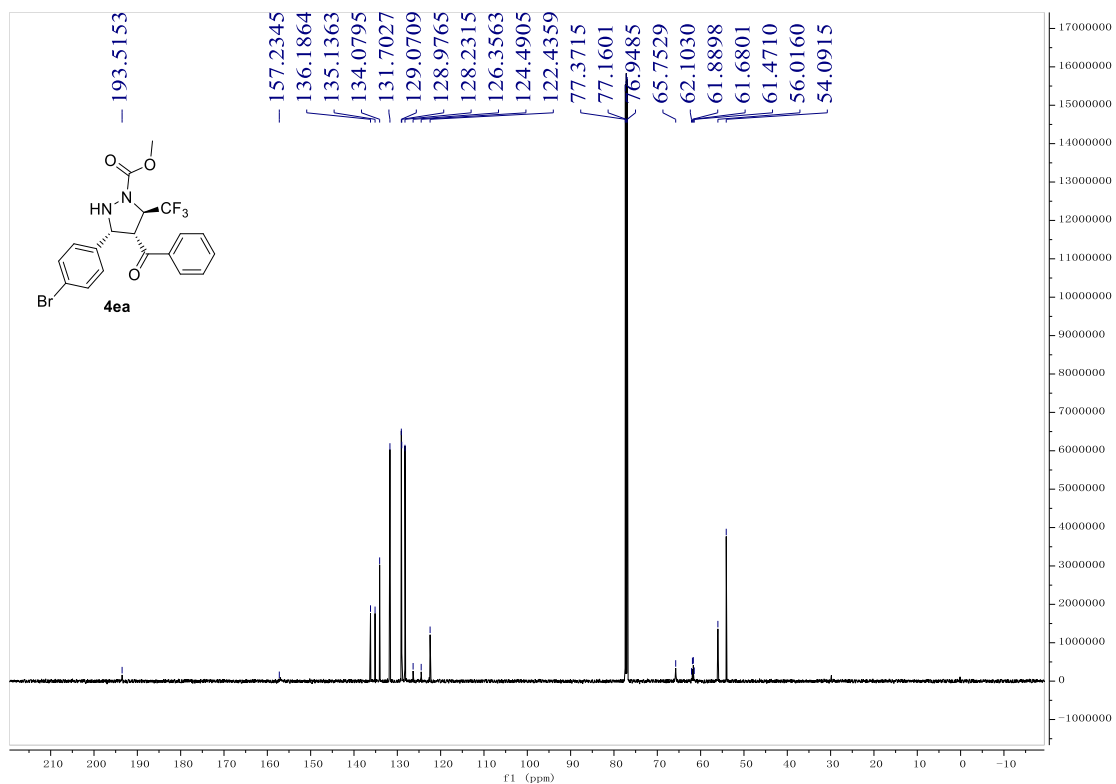

**<sup>19</sup>F{<sup>1</sup>H} NMR of 4ea (565 MHz, CDCl<sub>3</sub>)**

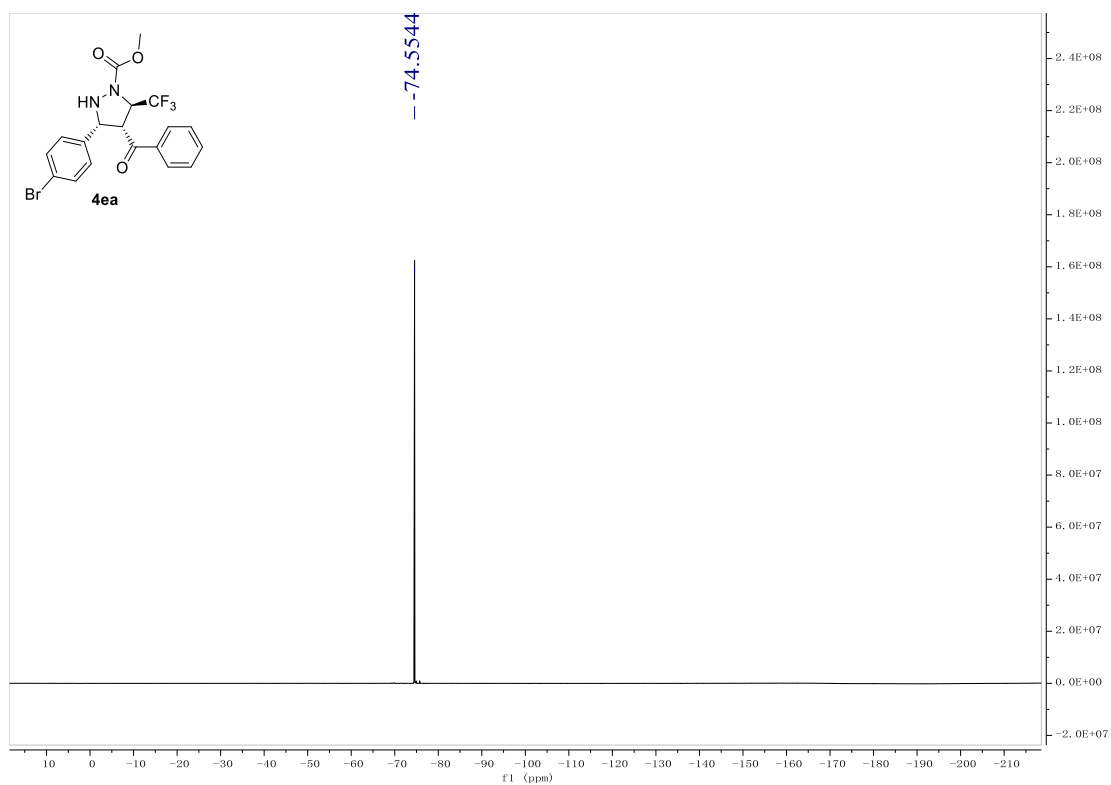

**<sup>1</sup>H NMR of 4fa (400 MHz, CDCl<sub>3</sub>)**

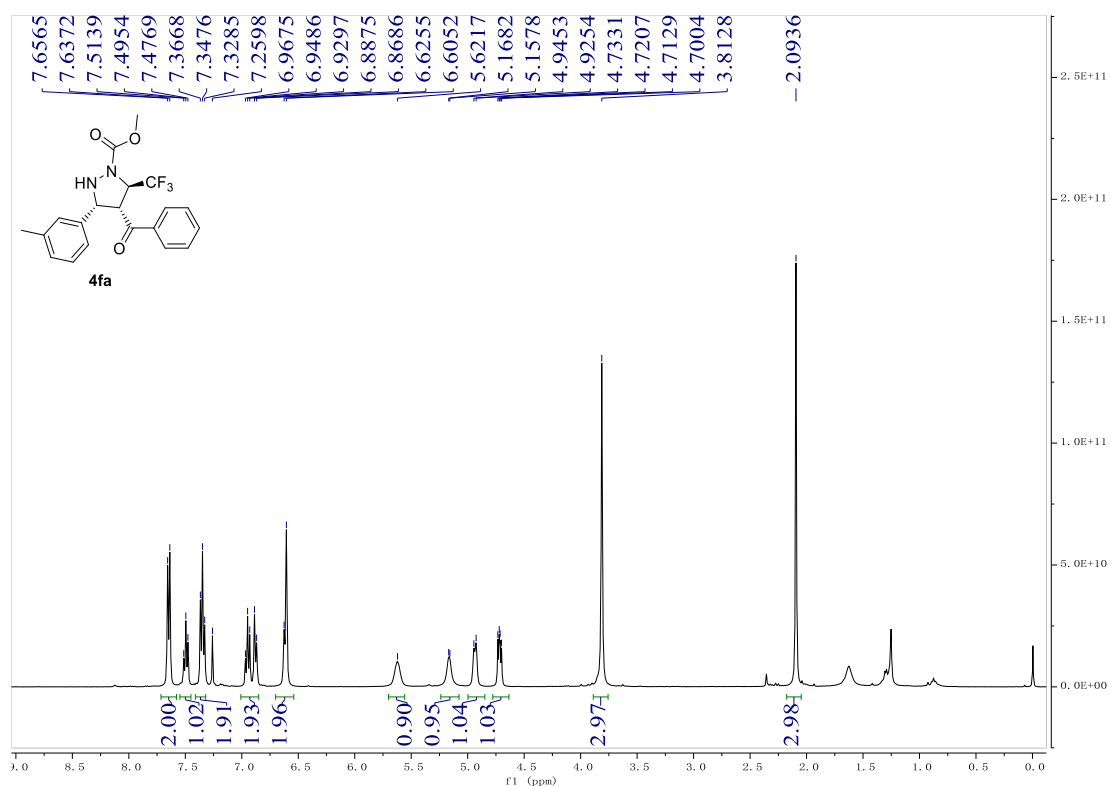

**<sup>13</sup>C{<sup>1</sup>H} NMR of 4fa (150 MHz, CDCl<sub>3</sub>)**

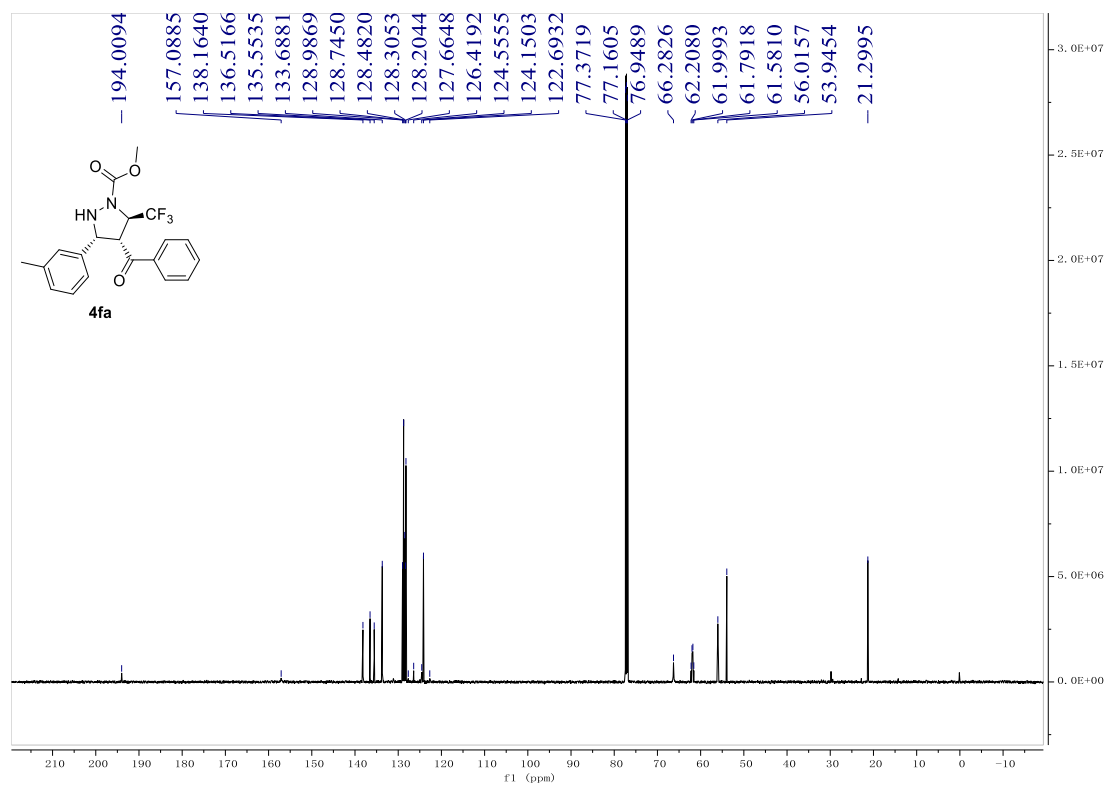

**<sup>19</sup>F{<sup>1</sup>H} NMR of 4fa (376 MHz, CDCl<sub>3</sub>)**

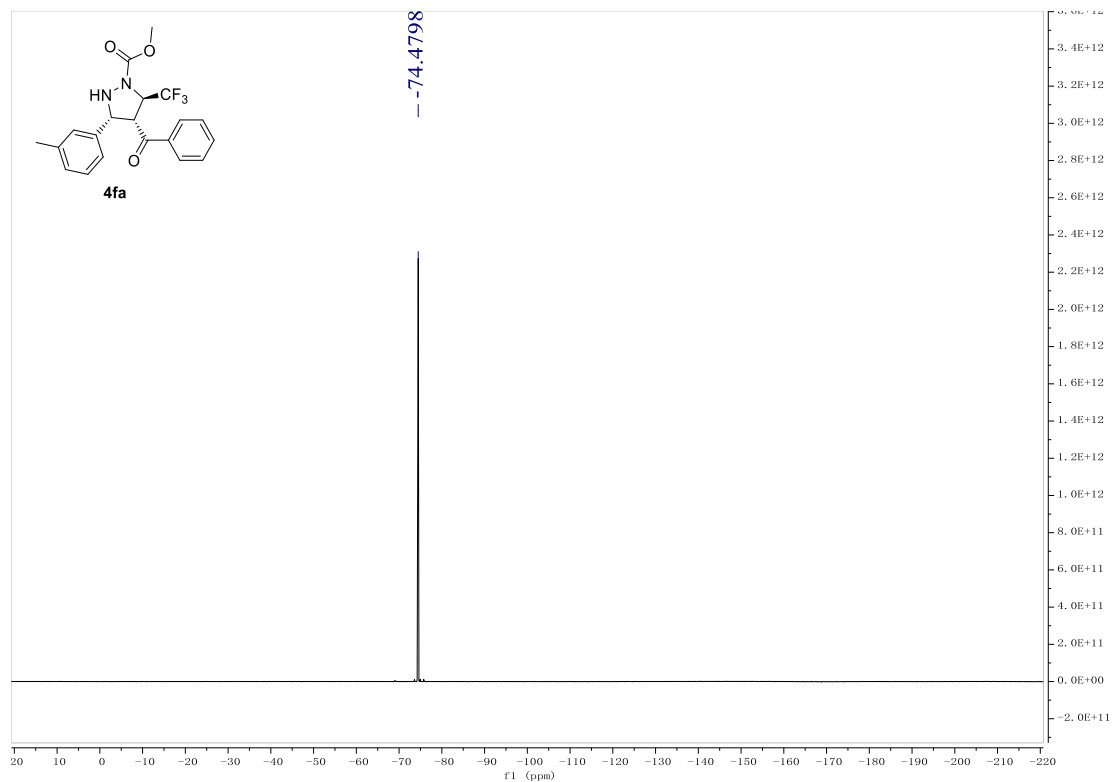

**$^1\text{H}$  NMR of 4ga (400 MHz,  $\text{CDCl}_3$ )**

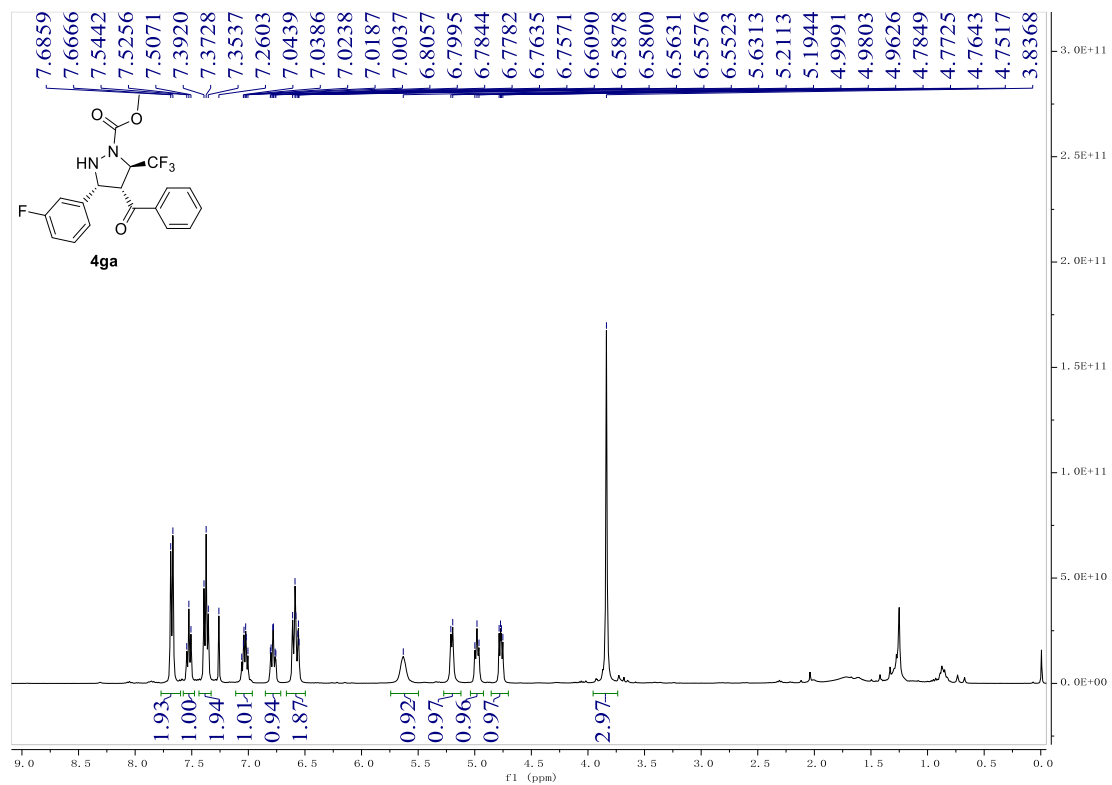

**$^{13}\text{C}\{^1\text{H}\}$  NMR of 4ga (100 MHz,  $\text{CDCl}_3$ )**

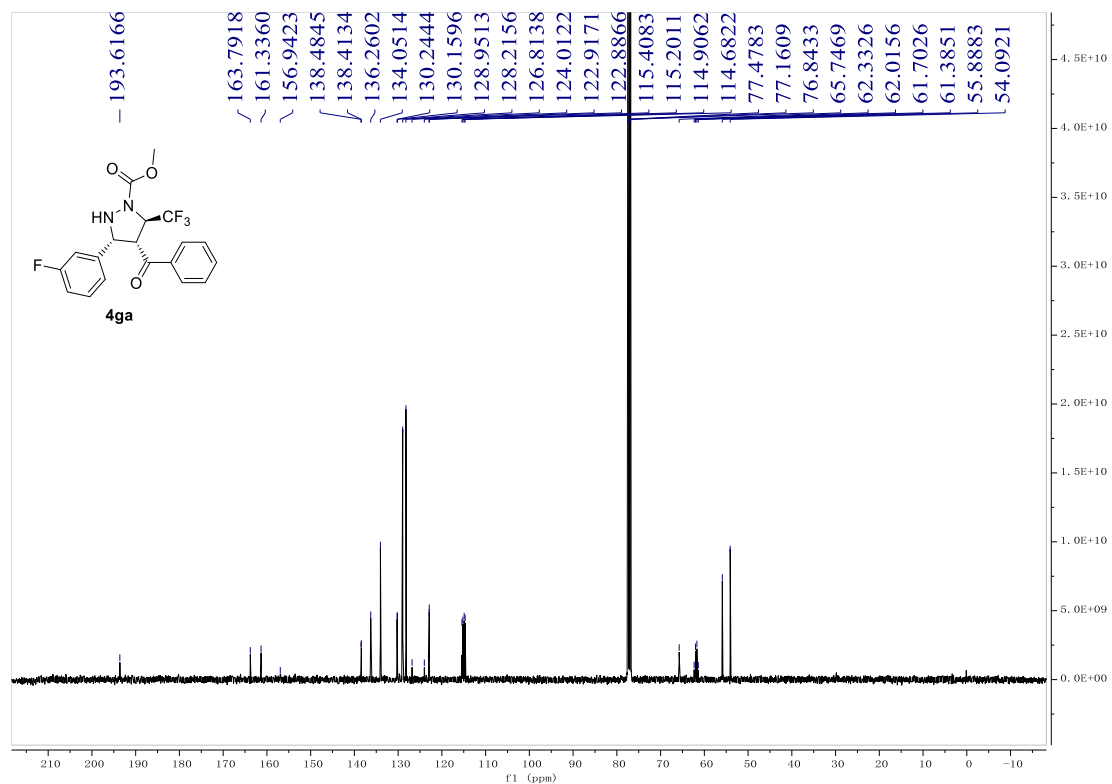

**<sup>19</sup>F{<sup>1</sup>H} NMR of 4ga (376 MHz, CDCl<sub>3</sub>)**

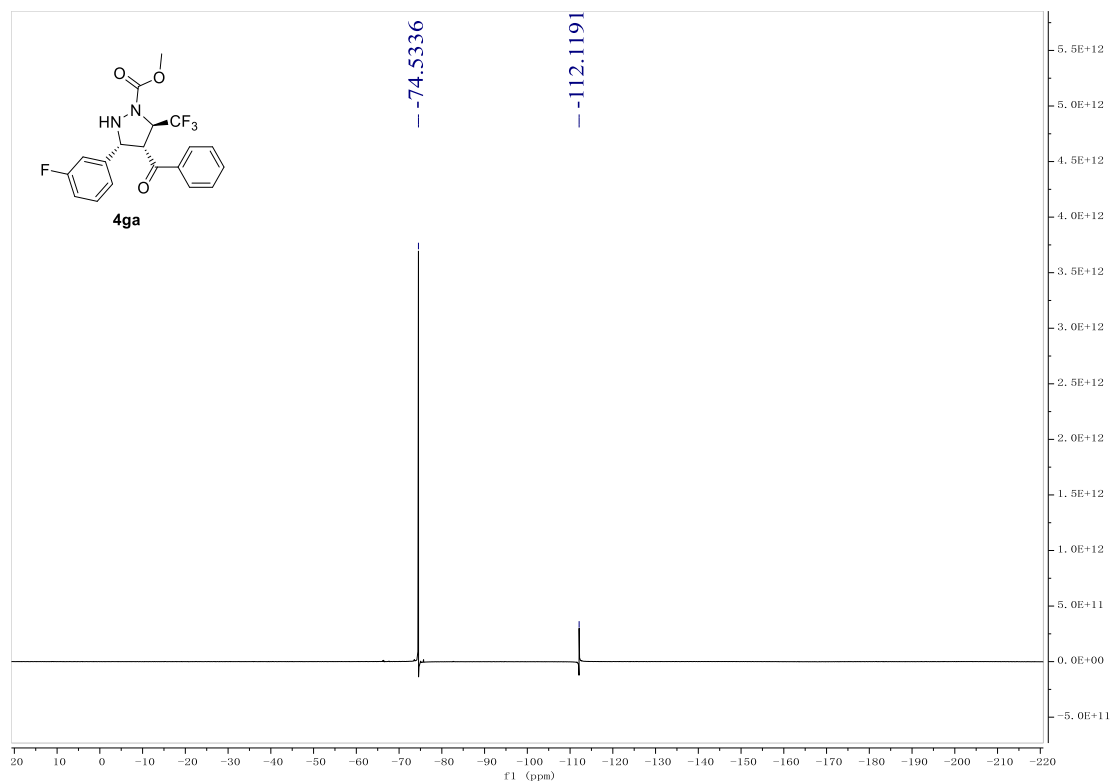

**<sup>1</sup>H NMR of 4ha (600 MHz, CDCl<sub>3</sub>)**

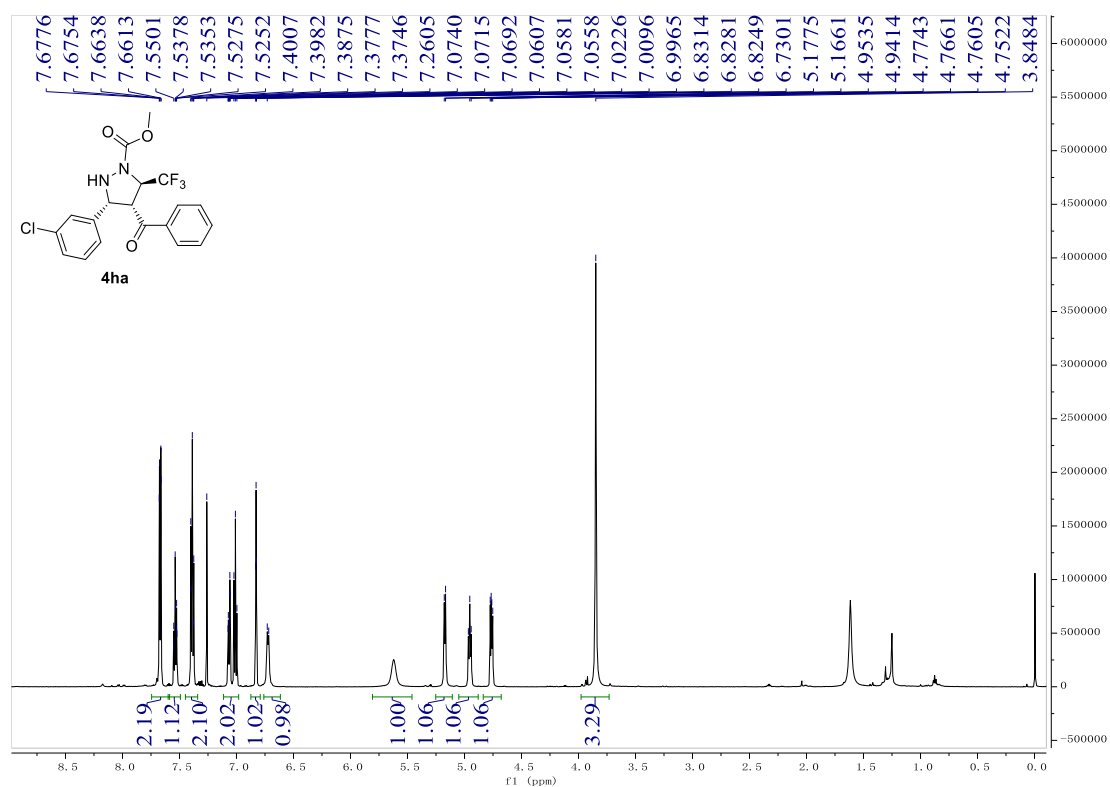

**<sup>13</sup>C{<sup>1</sup>H} NMR of 4ha (150 MHz, CDCl<sub>3</sub>)**

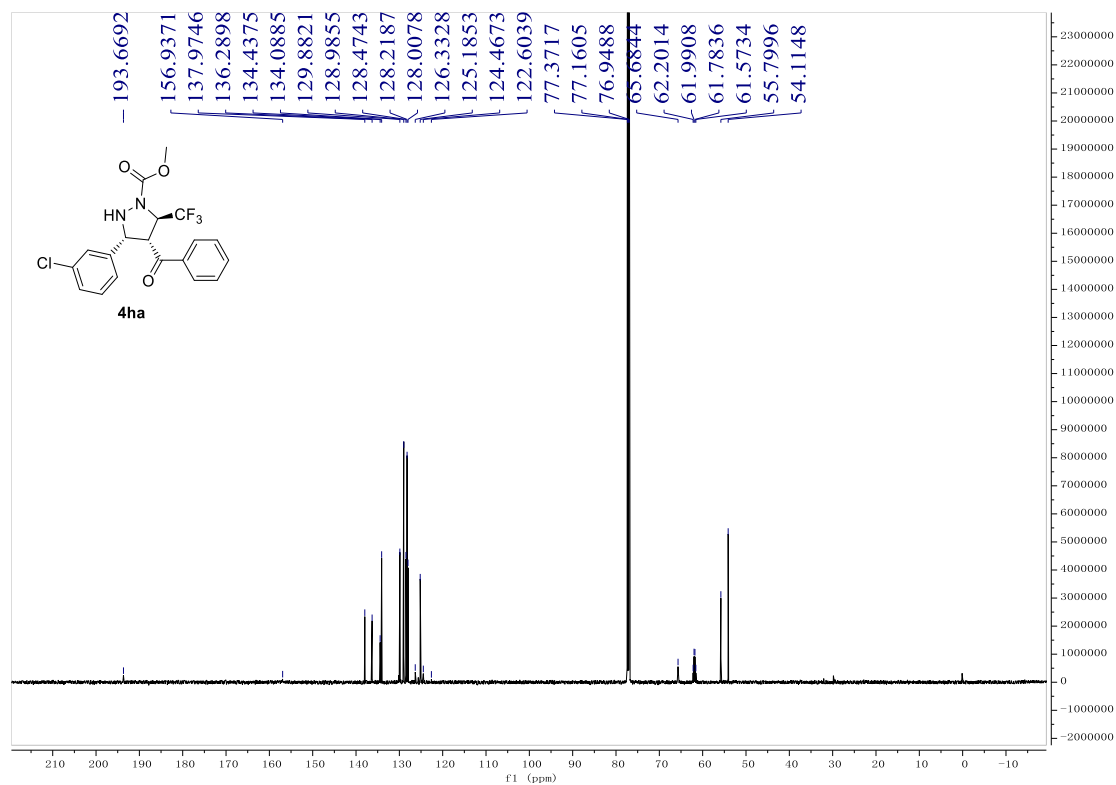

**<sup>19</sup>F{<sup>1</sup>H} NMR of 4ha (565 MHz, CDCl<sub>3</sub>)**

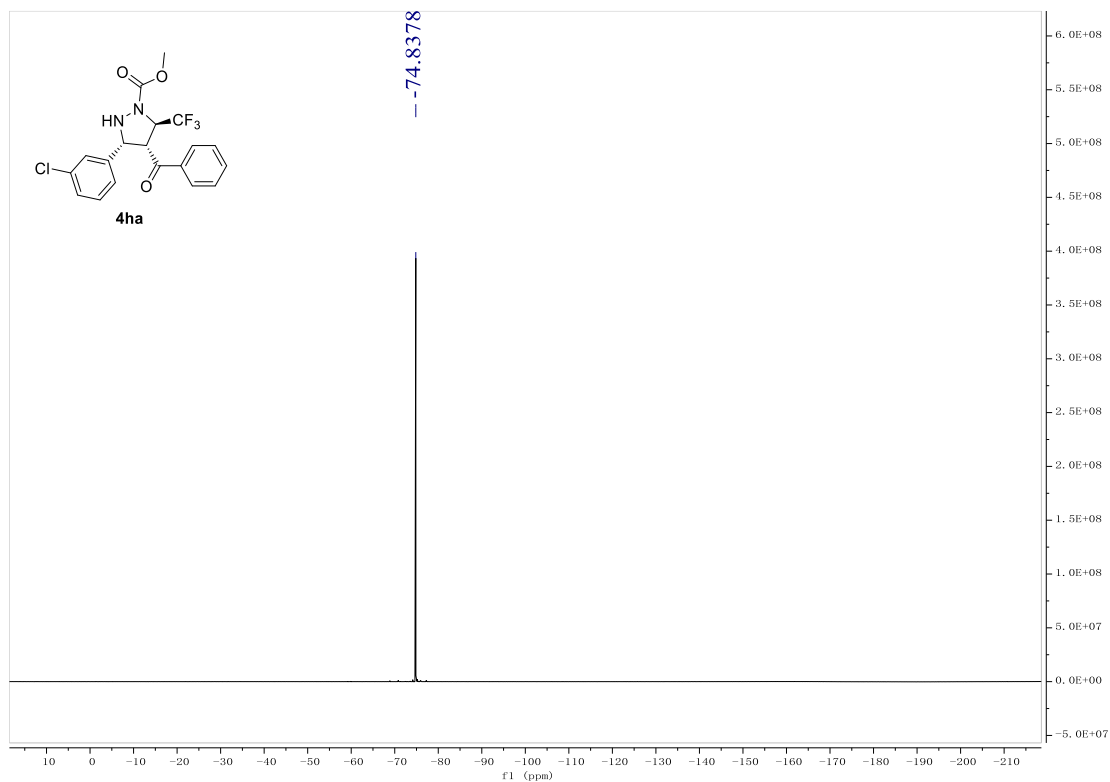

**$^1\text{H}$  NMR of 4ia (400 MHz,  $\text{CDCl}_3$ )**

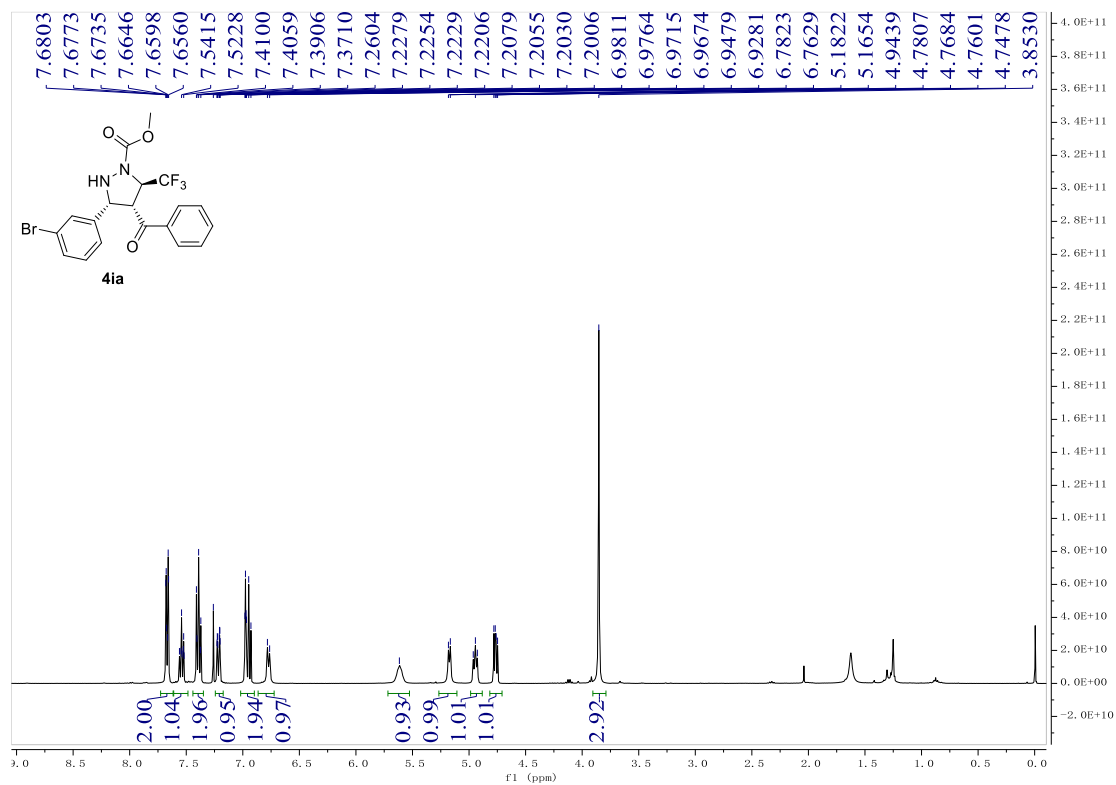

**$^{13}\text{C}\{^1\text{H}\}$  NMR of 4ia (100 MHz,  $\text{CDCl}_3$ )**



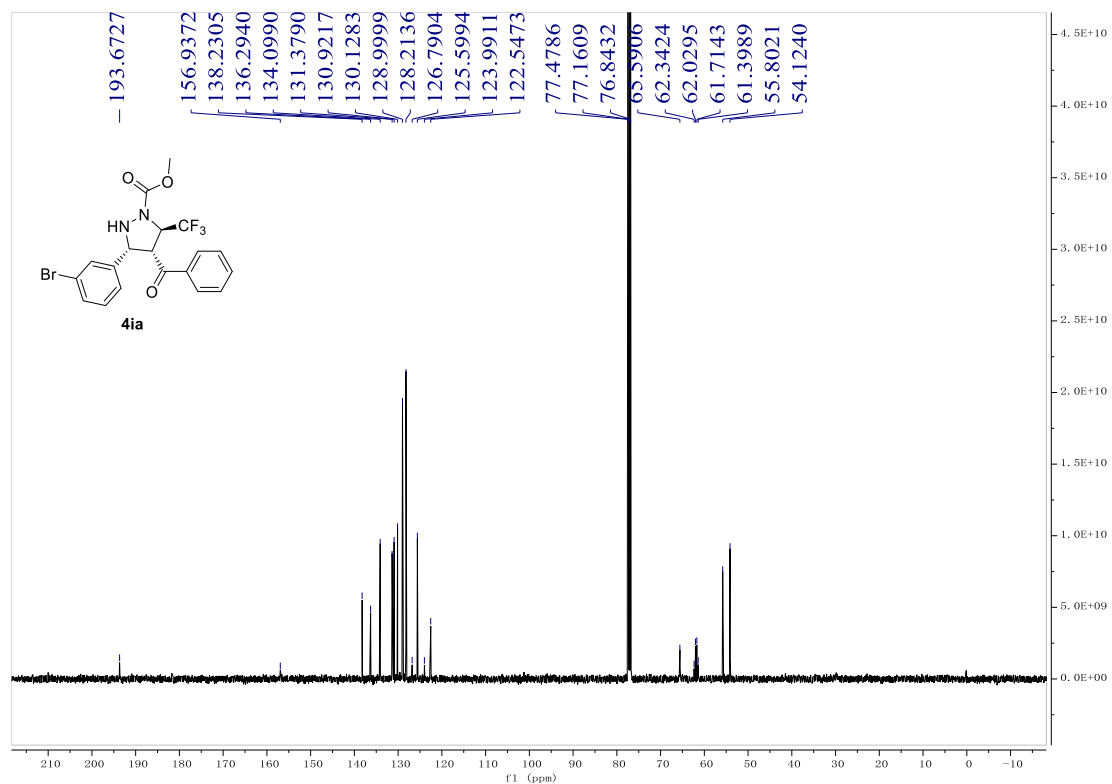

<sup>19</sup>F{<sup>1</sup>H} NMR of 4ia (376 MHz, CDCl<sub>3</sub>)

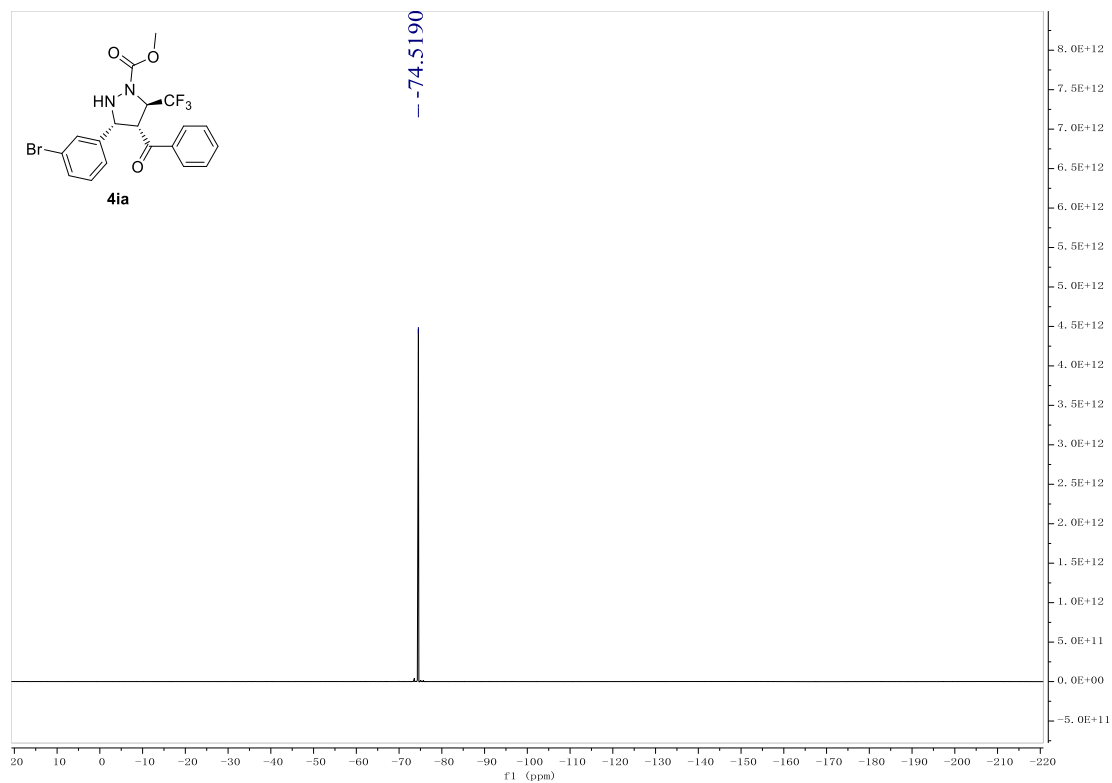

<sup>1</sup>H NMR of 4ja (600 MHz, CDCl<sub>3</sub>)

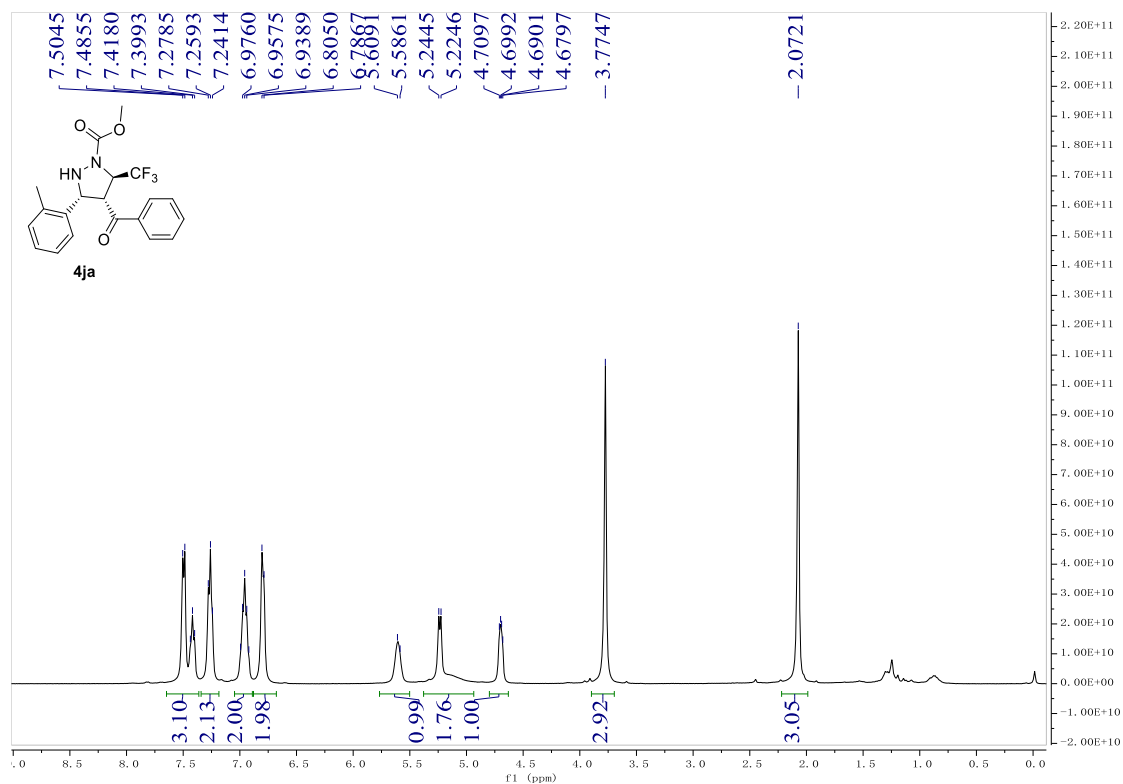

**<sup>13</sup>C{<sup>1</sup>H} NMR of 4ja (100 MHz, CDCl<sub>3</sub>)**

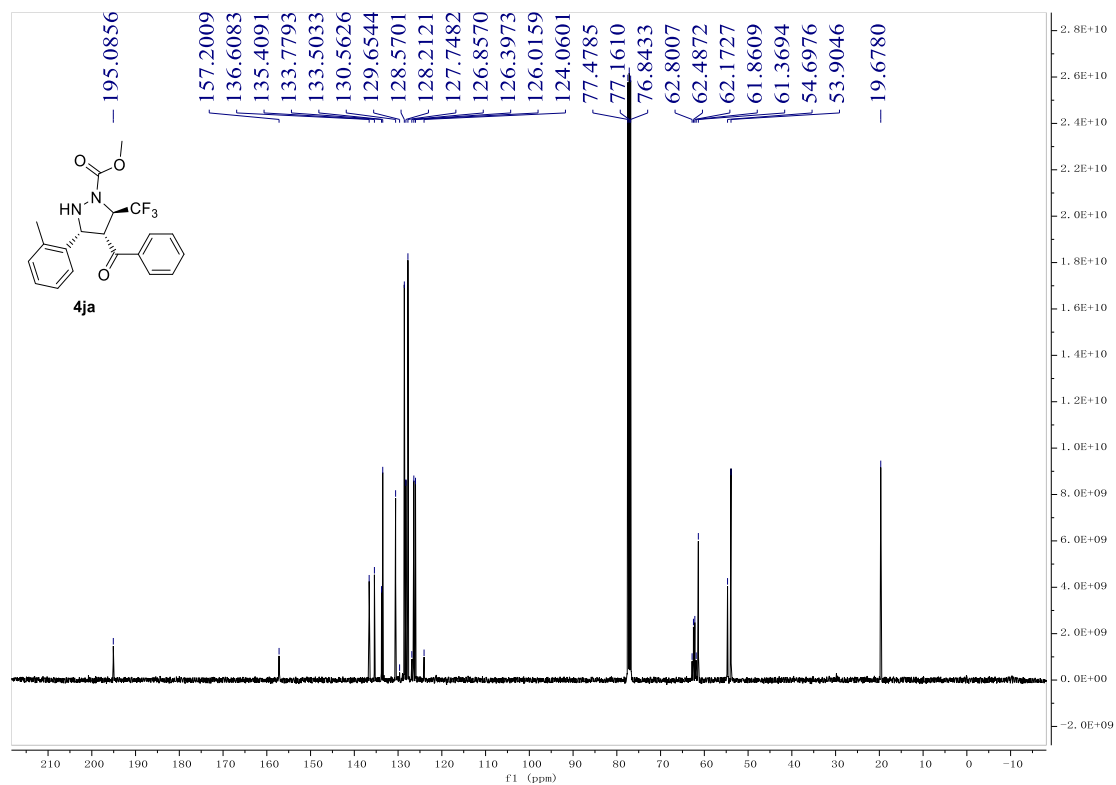

**<sup>19</sup>F{<sup>1</sup>H} NMR of 4ja (376 MHz, CDCl<sub>3</sub>)**

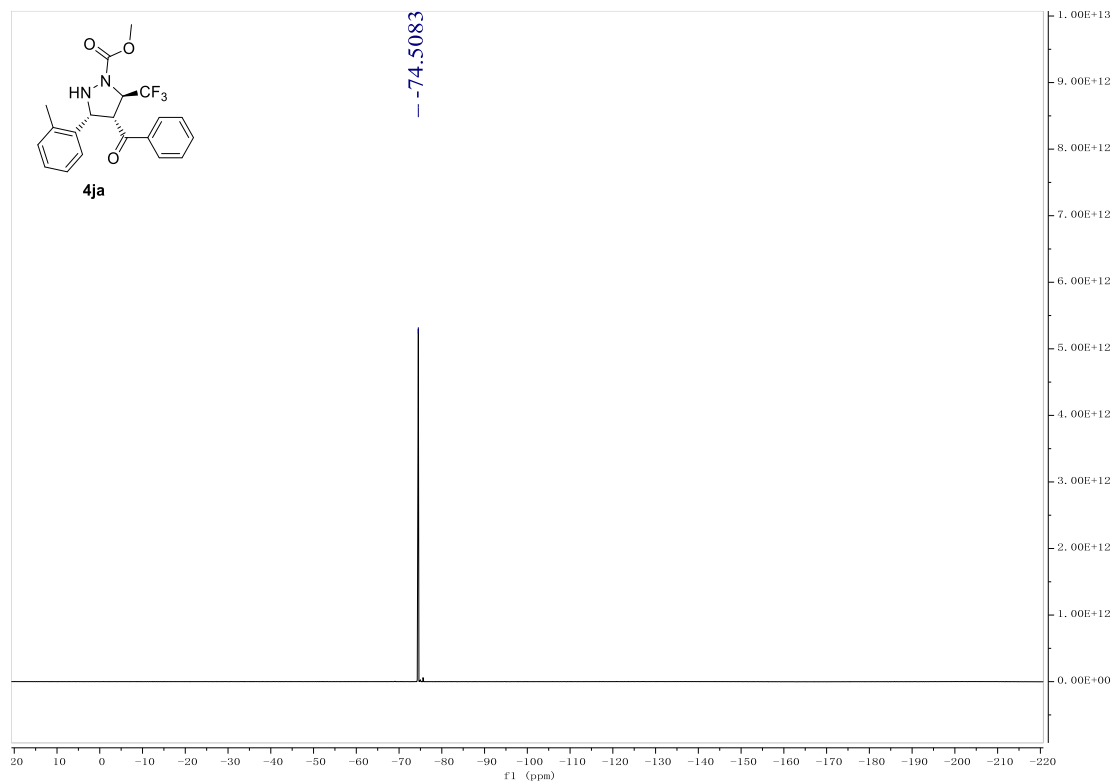

**$^1\text{H}$  NMR of 4ka (600 MHz,  $\text{CDCl}_3$ )**

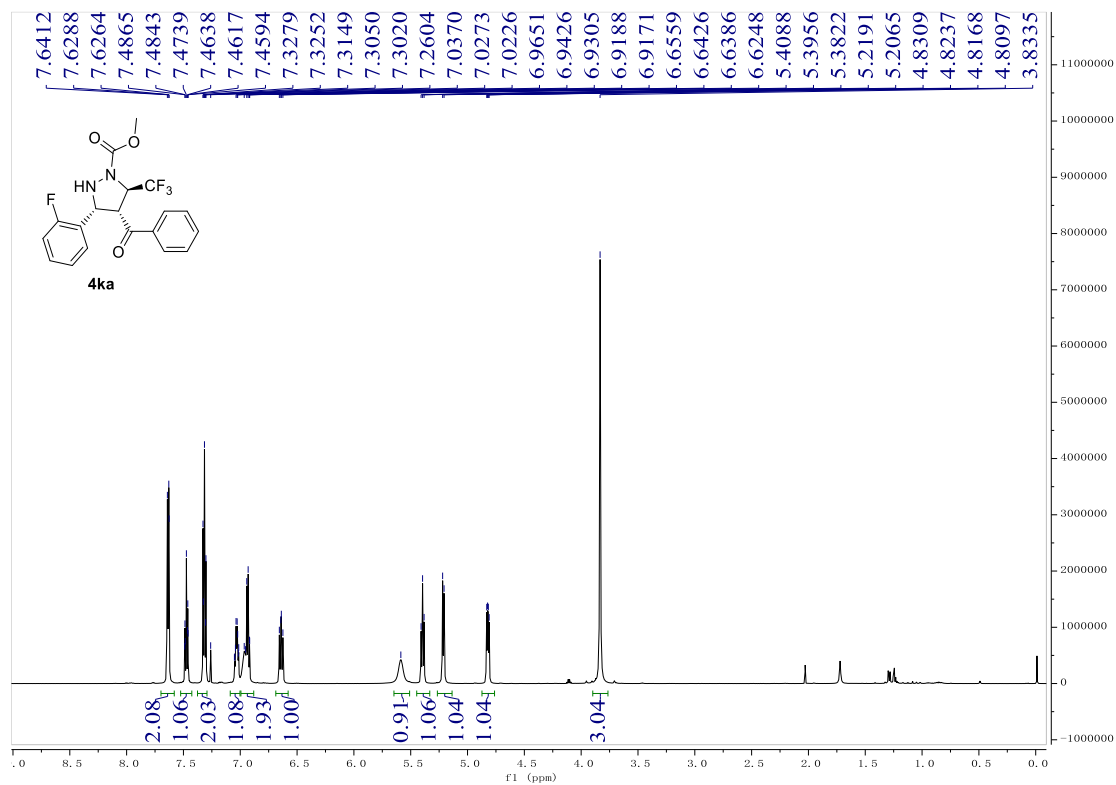

**$^{13}\text{C}\{^1\text{H}\}$  NMR of 4ka (150 MHz,  $\text{CDCl}_3$ )**

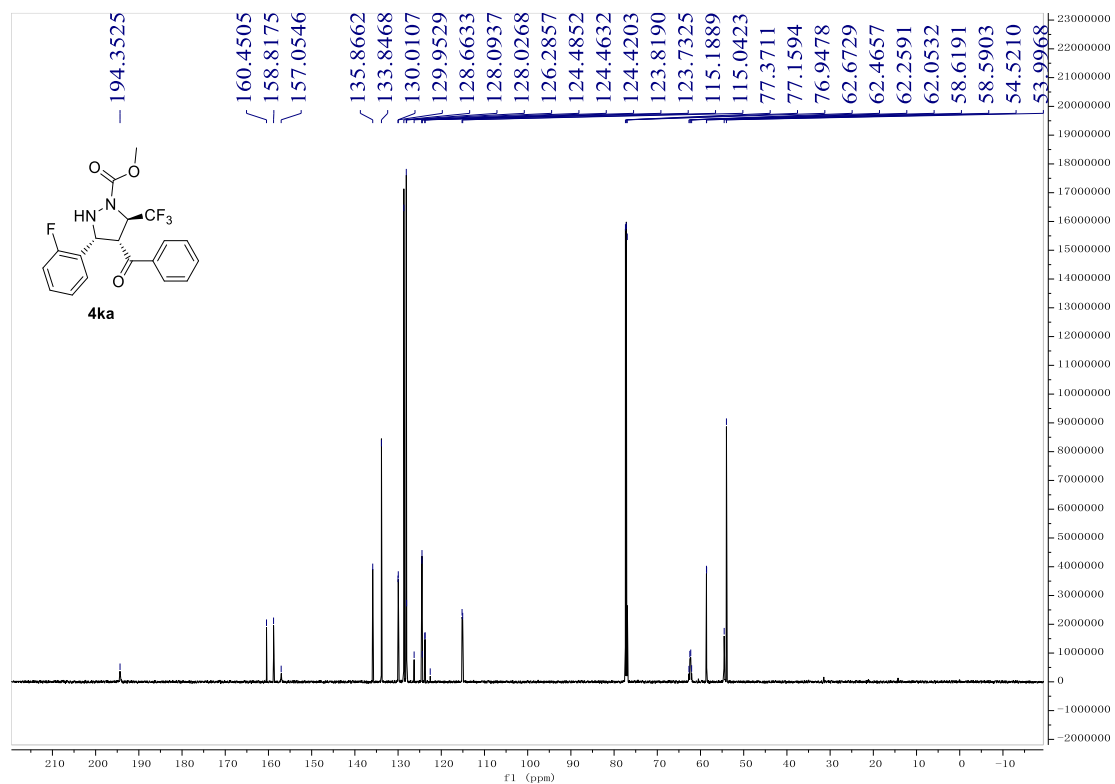

**<sup>19</sup>F{<sup>1</sup>H} NMR of 4ka (565 MHz, CDCl<sub>3</sub>)**

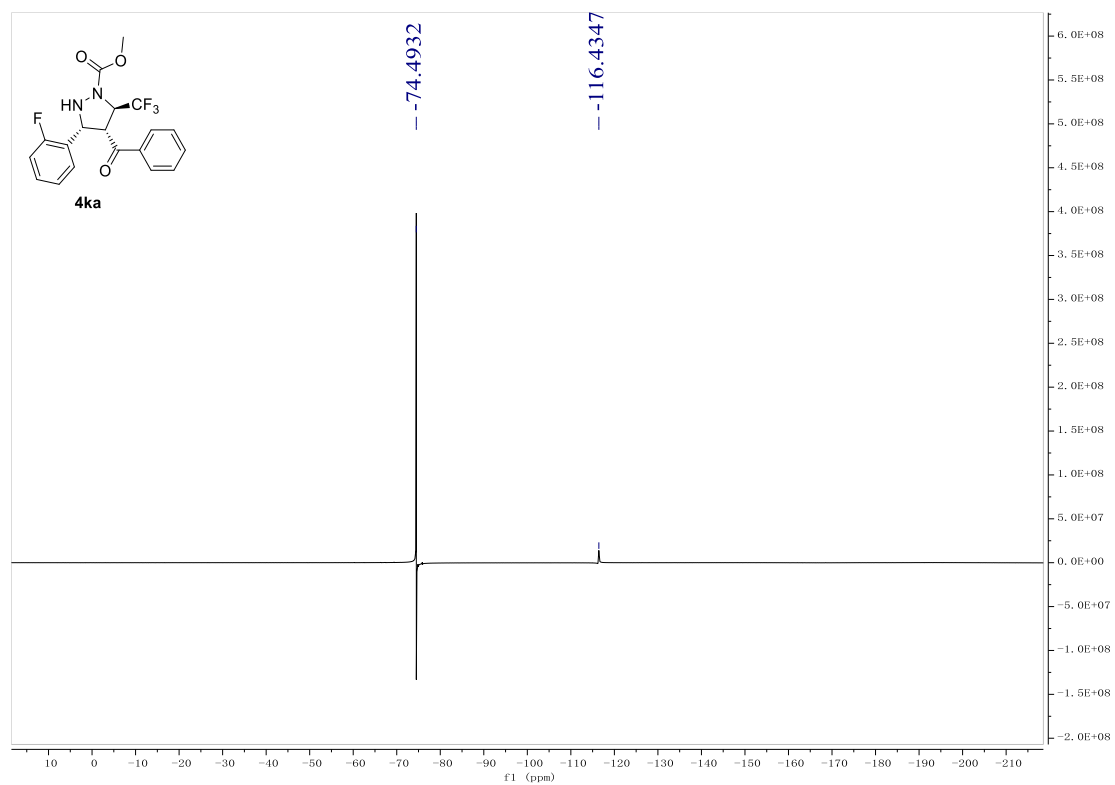

**<sup>1</sup>H NMR of 4la (600 MHz, CDCl<sub>3</sub>)**

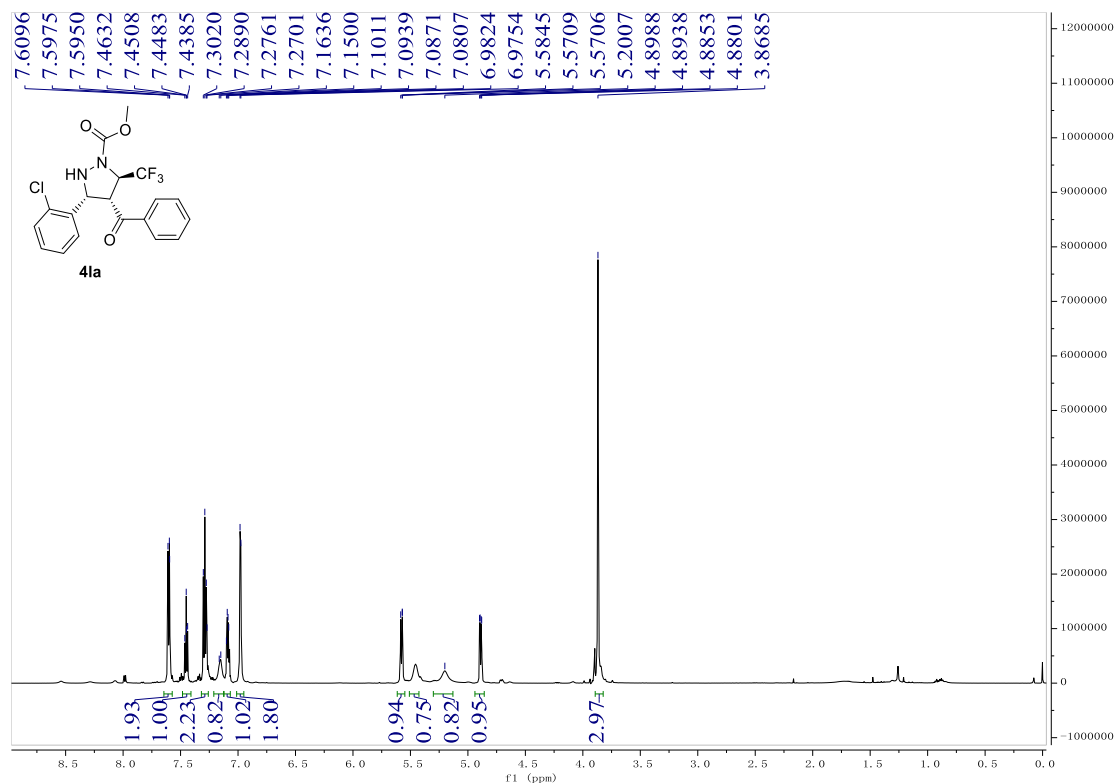

**<sup>13</sup>C{<sup>1</sup>H} NMR of 4la (150 MHz, CDCl<sub>3</sub>)**

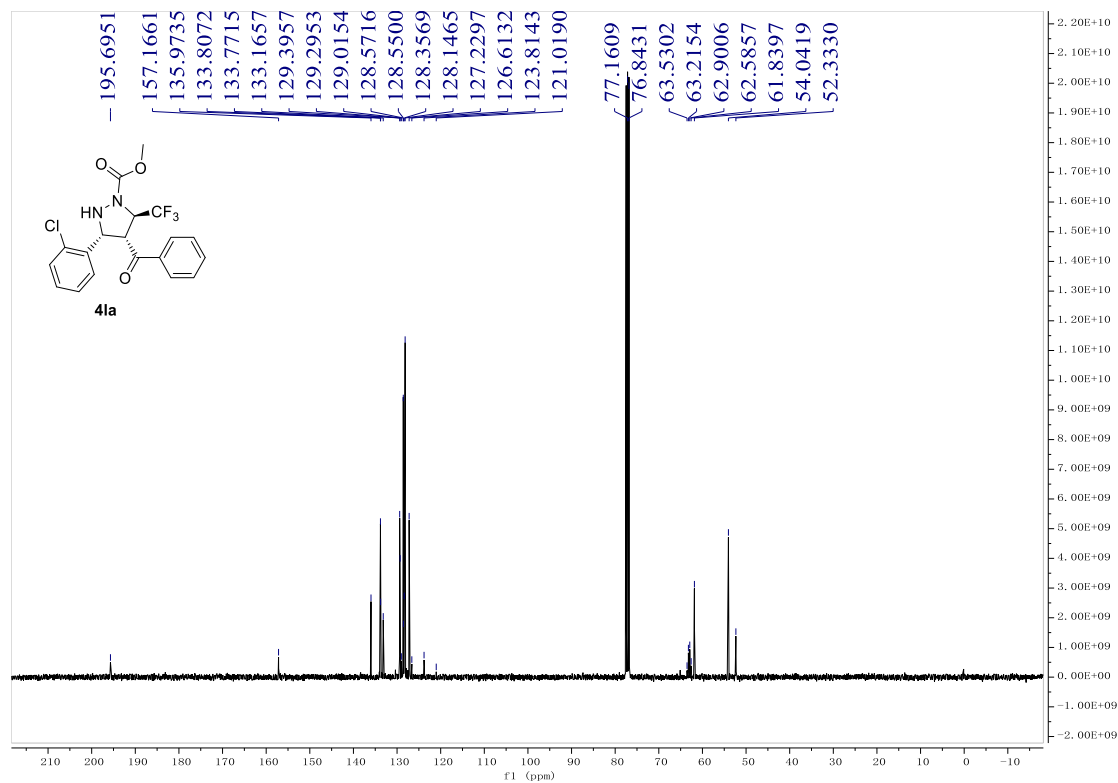

**<sup>19</sup>F{<sup>1</sup>H} NMR of 4la (565 MHz, CDCl<sub>3</sub>)**

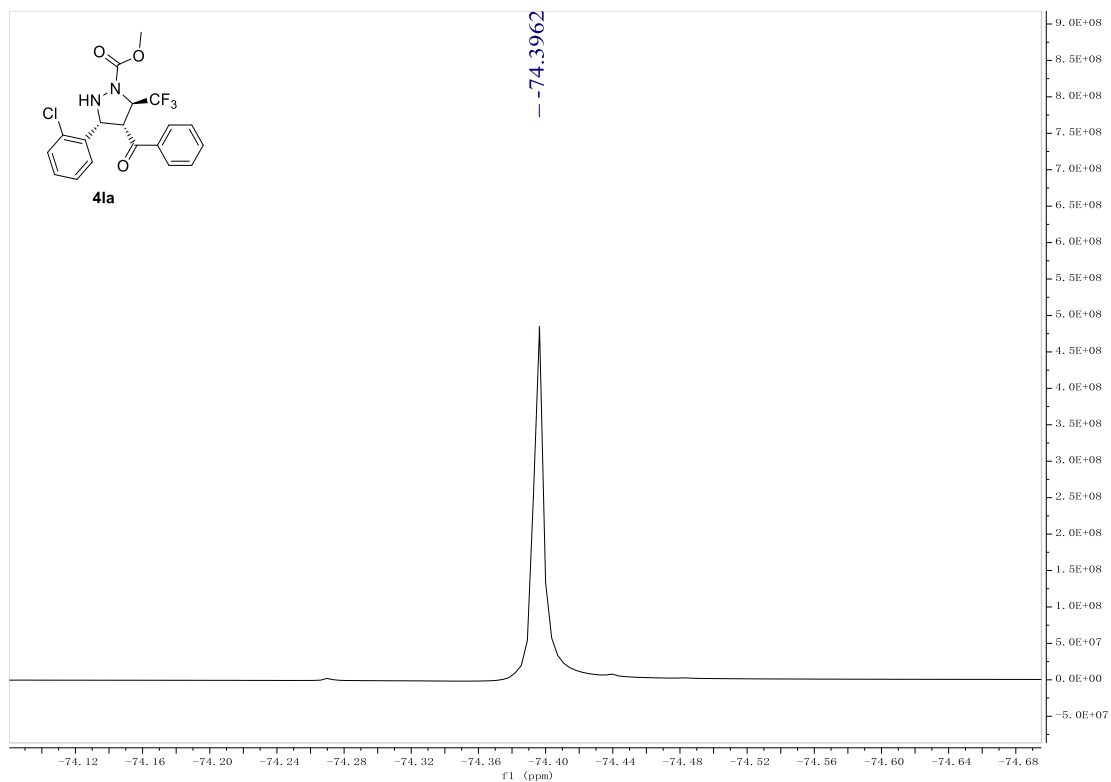

**$^1\text{H}$  NMR of 4ma (600 MHz,  $\text{CDCl}_3$ )**

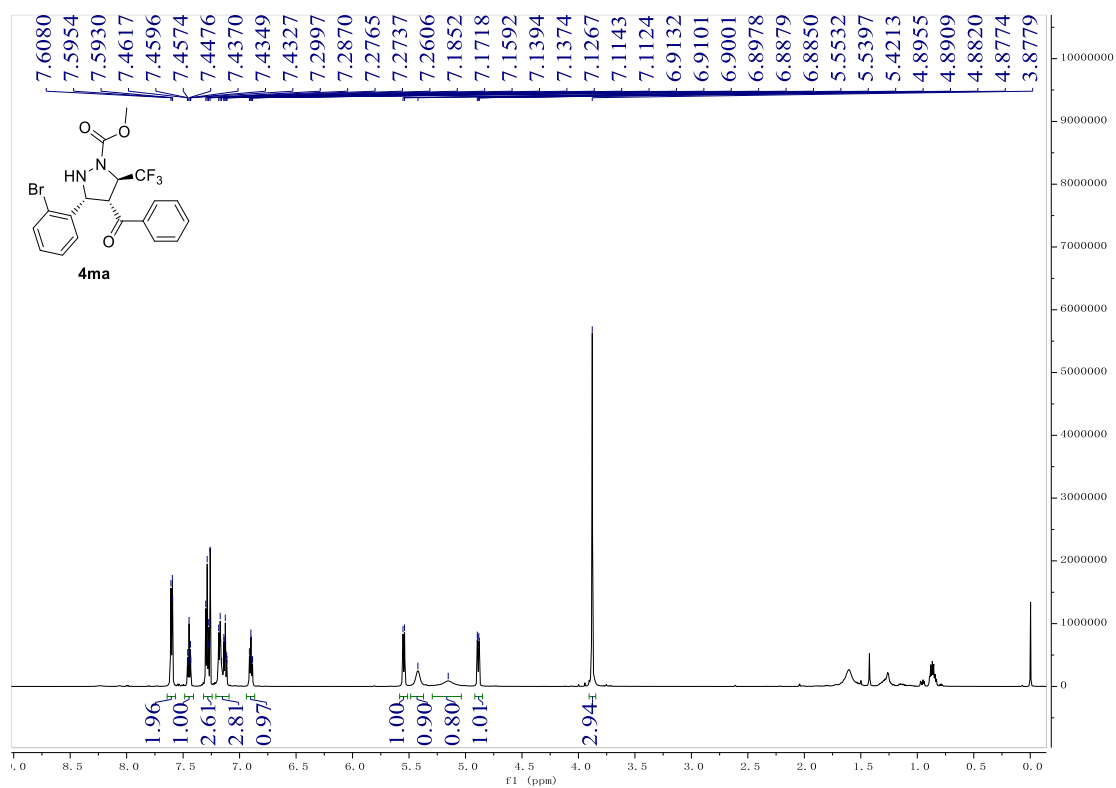

**$^{13}\text{C}\{^1\text{H}\}$  NMR of 4ma (100 MHz,  $\text{CDCl}_3$ )**

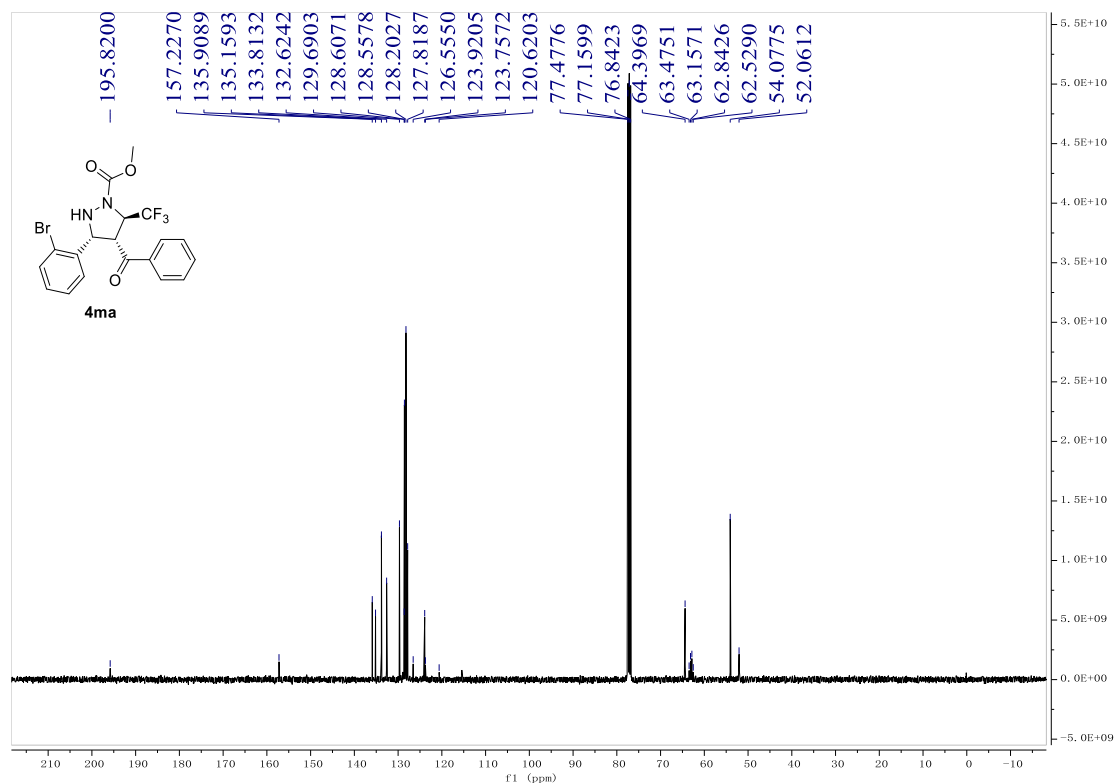

**$^{19}\text{F}\{^1\text{H}\}$  NMR of 4ma (565 MHz,  $\text{CDCl}_3$ )**

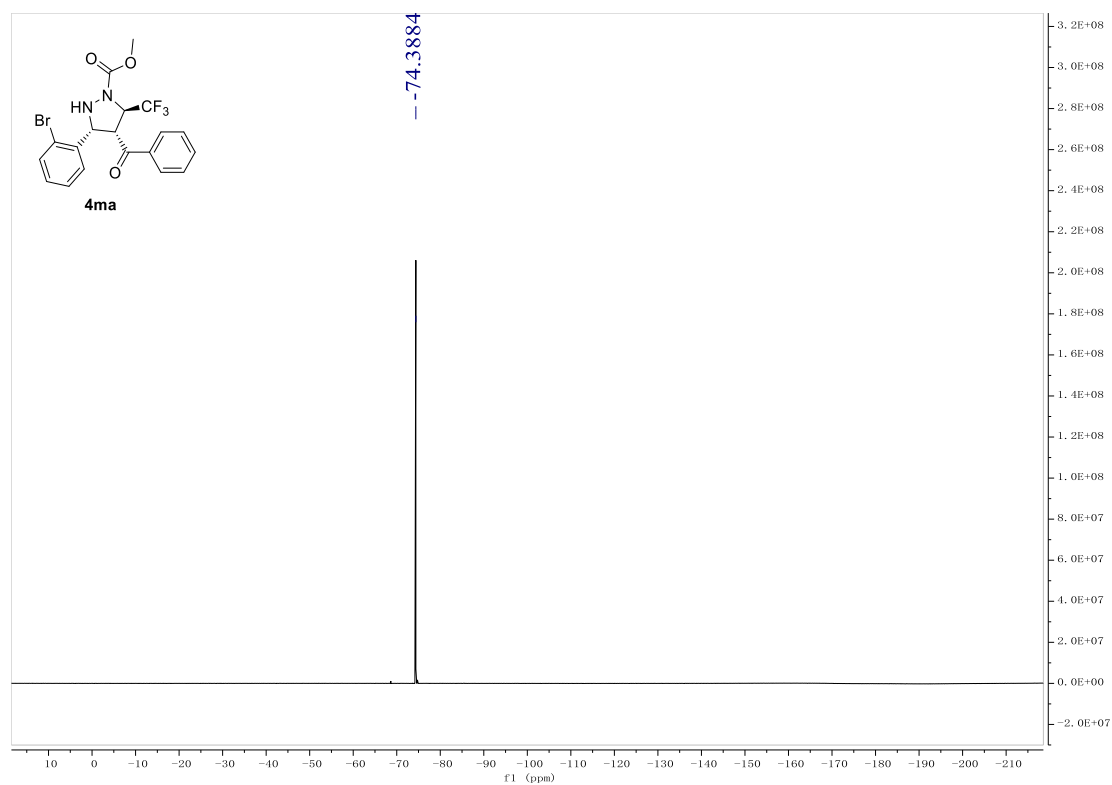

**$^1\text{H}$  NMR of 4na (600 MHz,  $\text{CDCl}_3$ )**

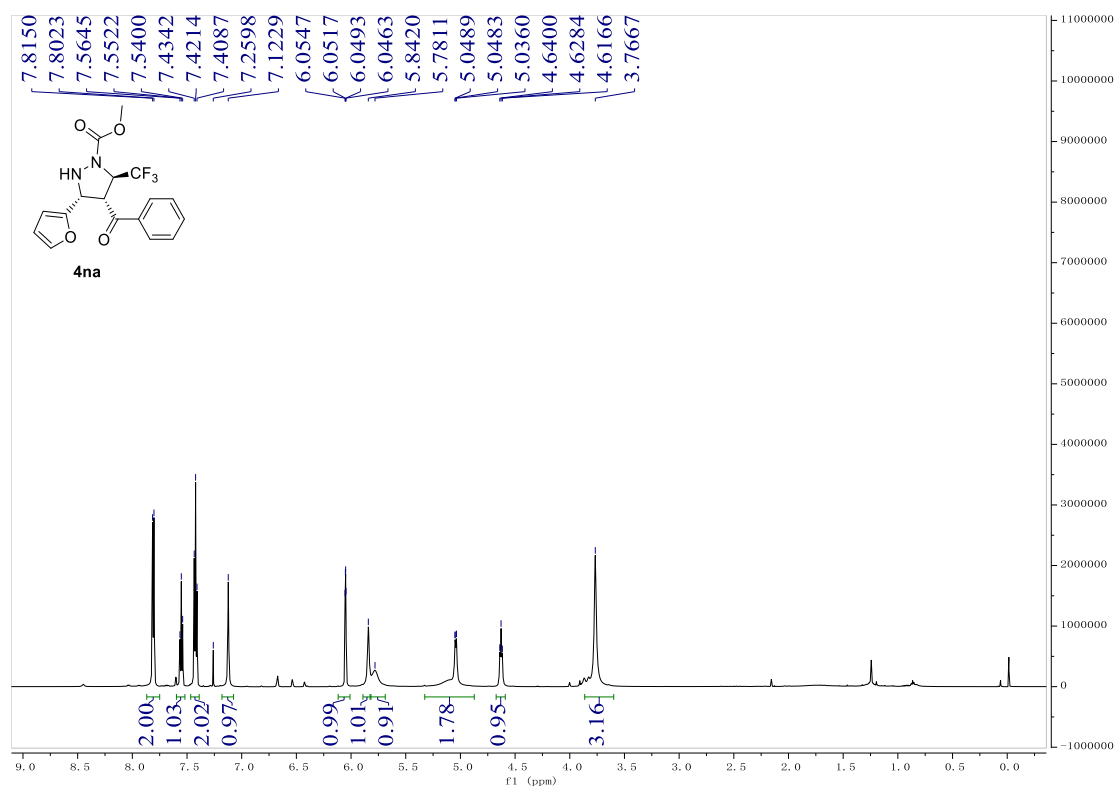

**<sup>13</sup>C{<sup>1</sup>H} NMR of 4na (150 MHz, CDCl<sub>3</sub>)**

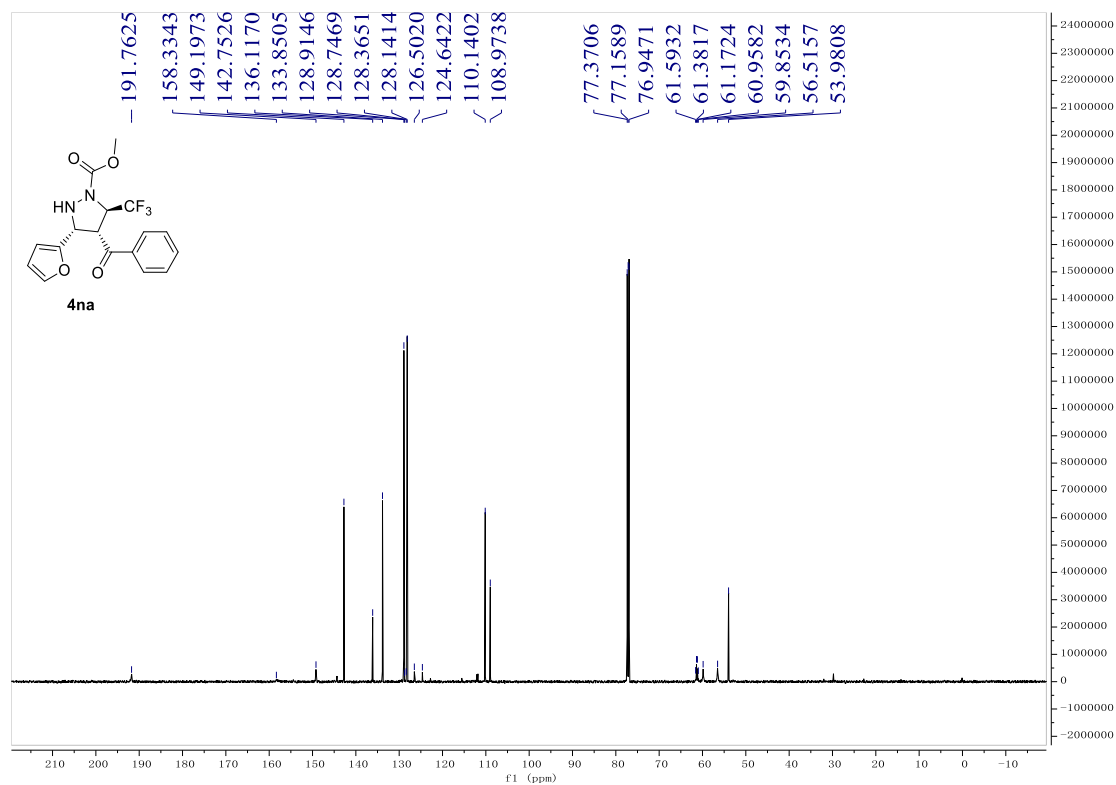

**<sup>19</sup>F{<sup>1</sup>H} NMR of 4na (565 MHz, CDCl<sub>3</sub>)**



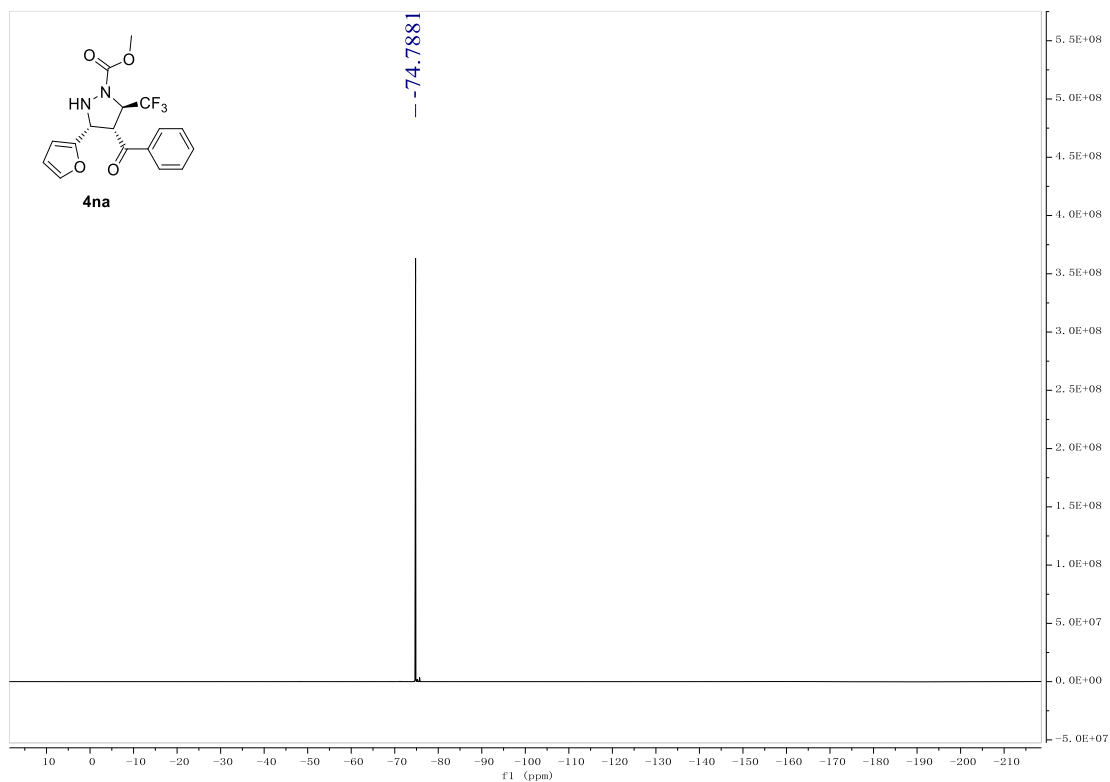

**$^1\text{H}$  NMR of 4oa (600 MHz,  $\text{CDCl}_3$ )**

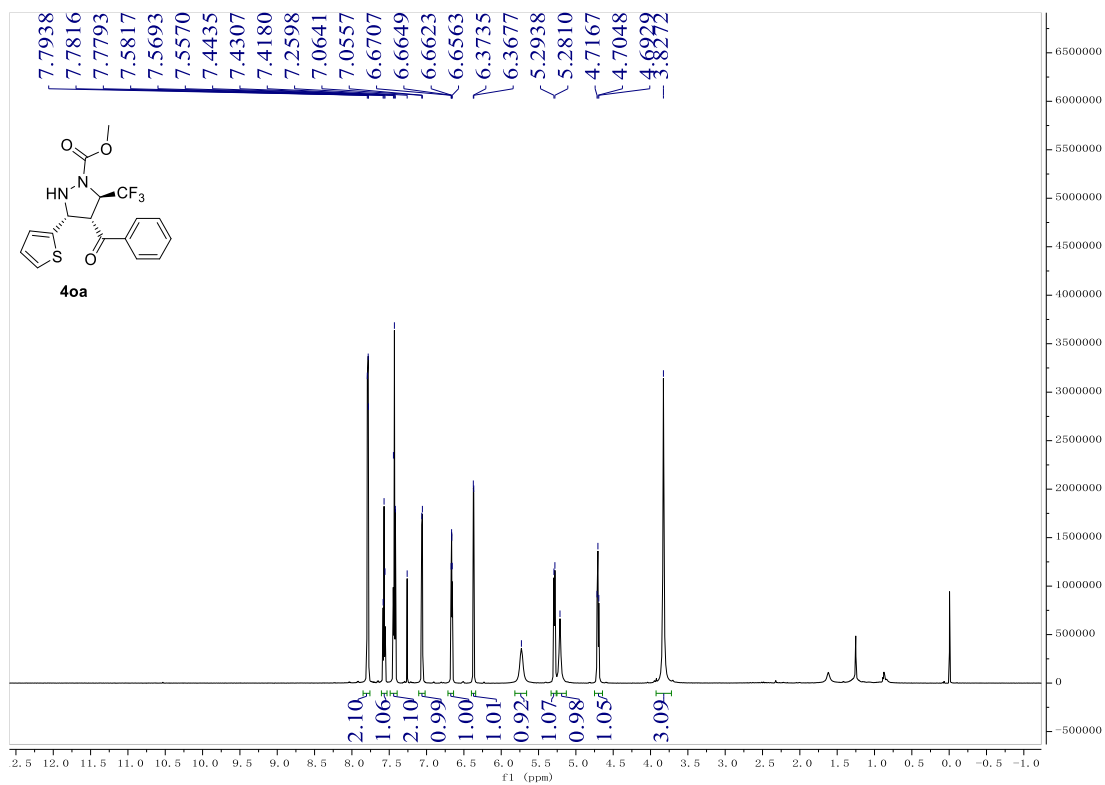

**$^{13}\text{C}\{^1\text{H}\}$  NMR of 4oa (150 MHz,  $\text{CDCl}_3$ )**

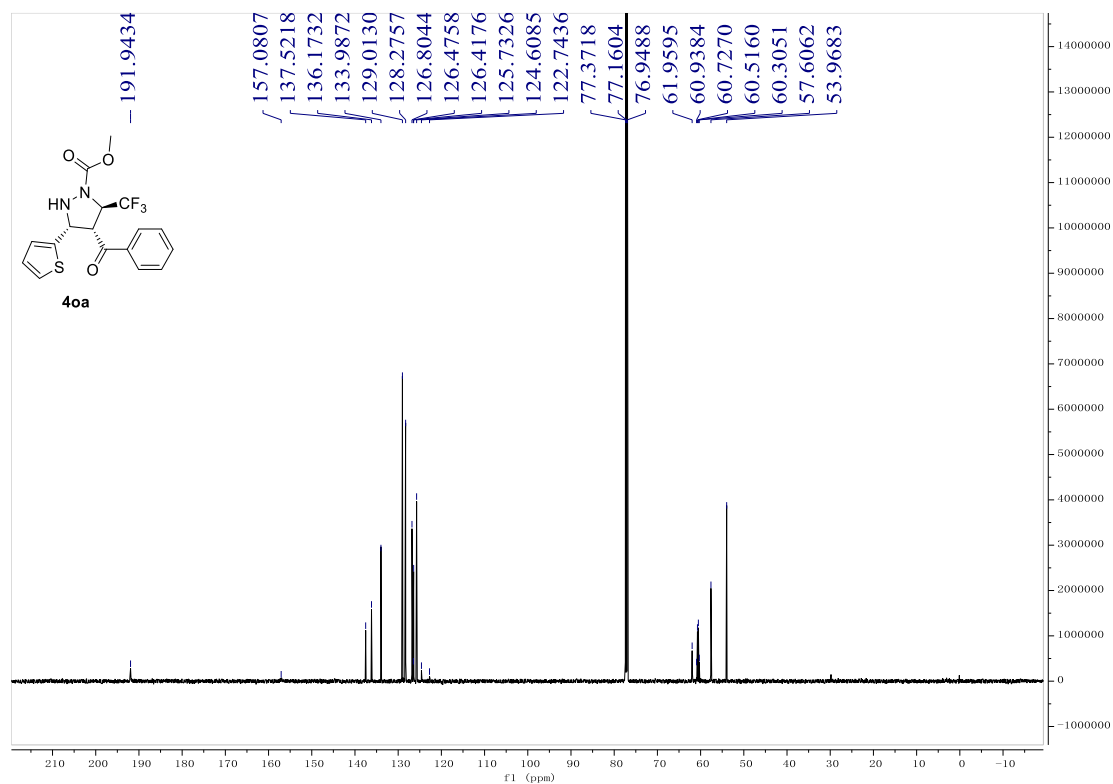

**<sup>19</sup>F{<sup>1</sup>H} NMR of 4a (565 MHz, CDCl<sub>3</sub>)**

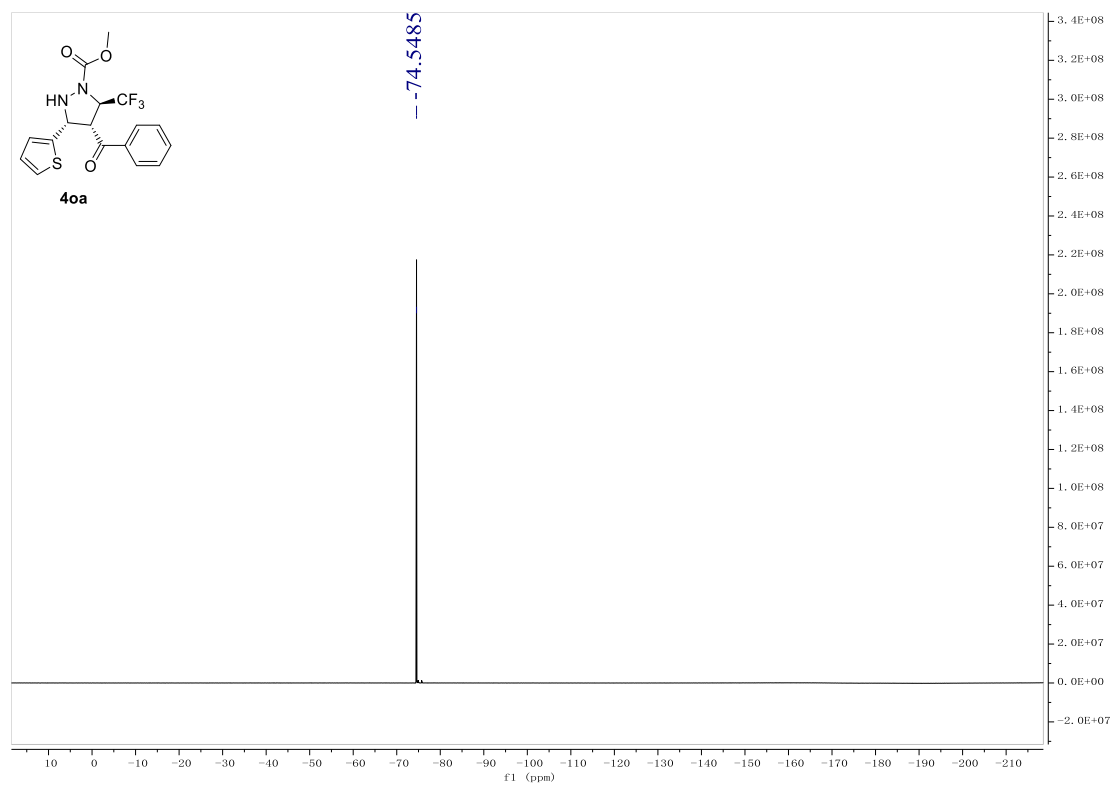

**<sup>1</sup>H NMR of 4pa (600 MHz, CDCl<sub>3</sub>)**

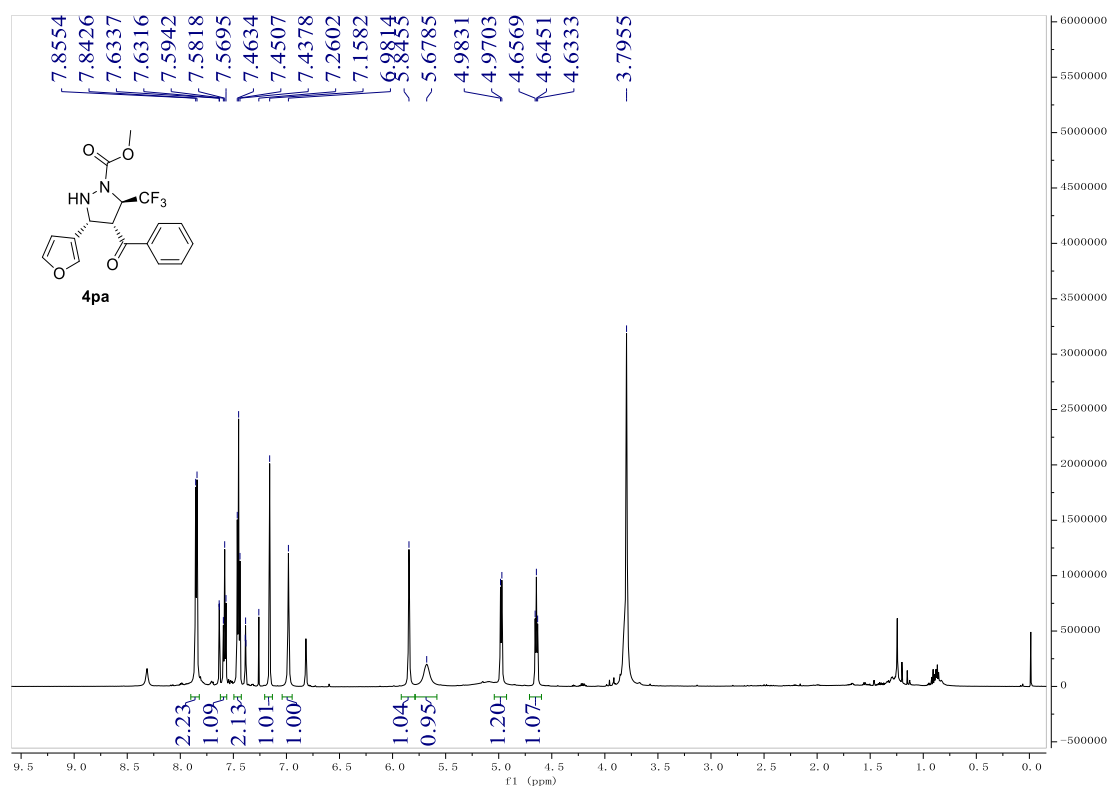

**<sup>13</sup>C{<sup>1</sup>H} NMR of 4pa (100 MHz, CDCl<sub>3</sub>)**

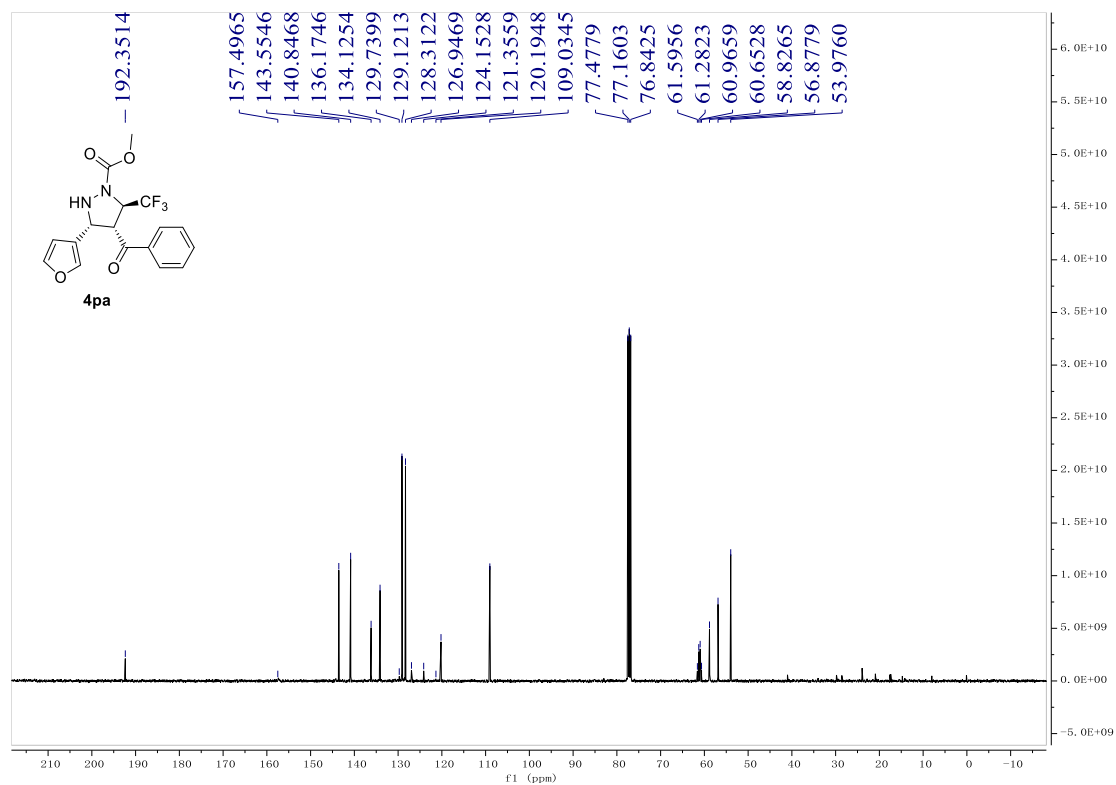

**<sup>19</sup>F{<sup>1</sup>H} NMR of 4pa (565 MHz, CDCl<sub>3</sub>)**

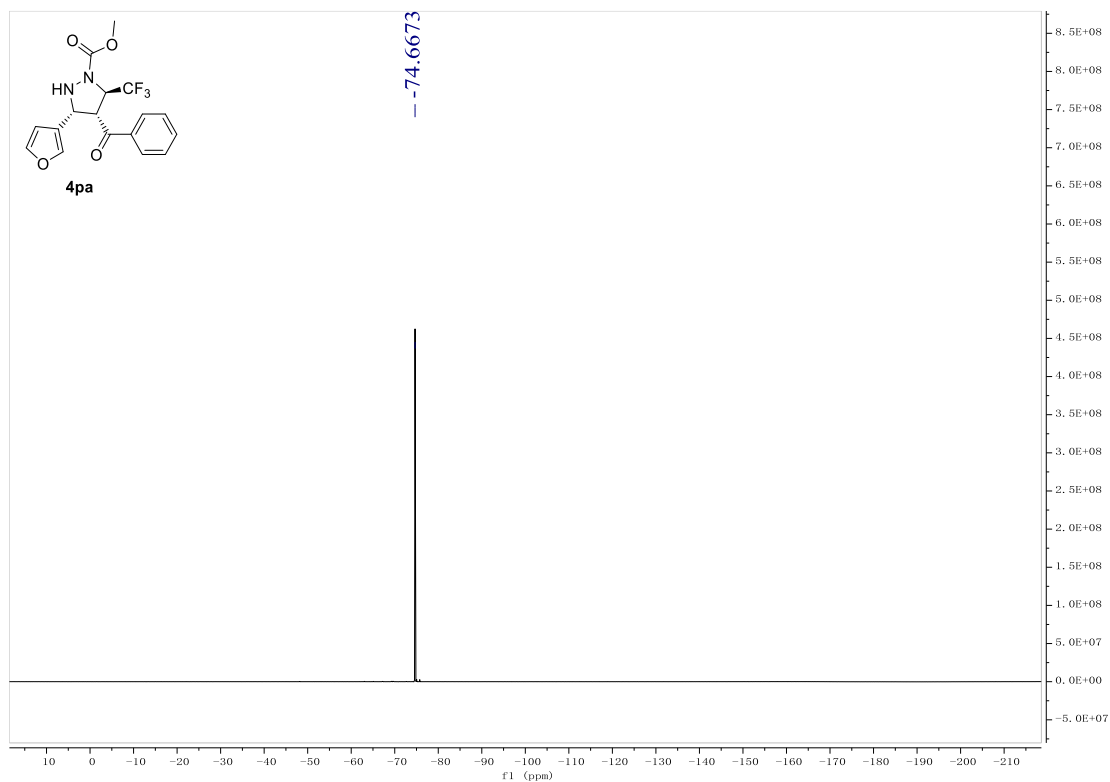

**$^1\text{H}$  NMR of 4qa (600 MHz,  $\text{CDCl}_3$ )**

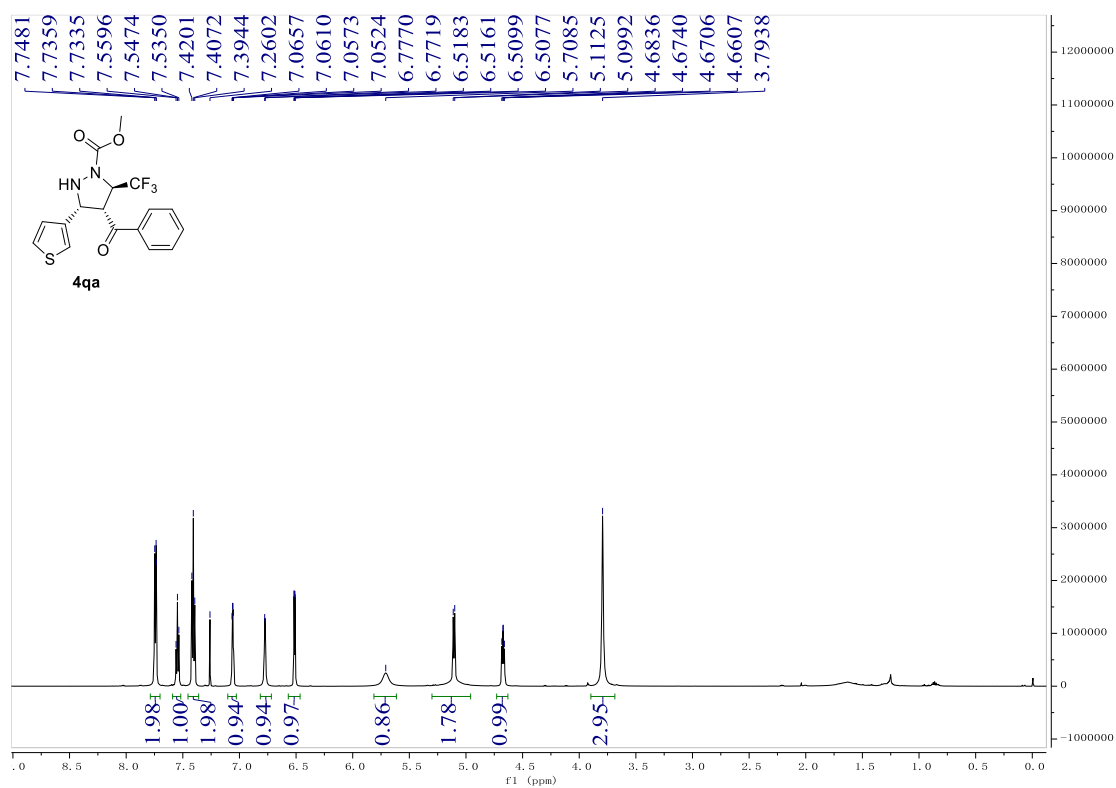

**$^{13}\text{C}\{^1\text{H}\}$  NMR of 4qa (150 MHz,  $\text{CDCl}_3$ )**

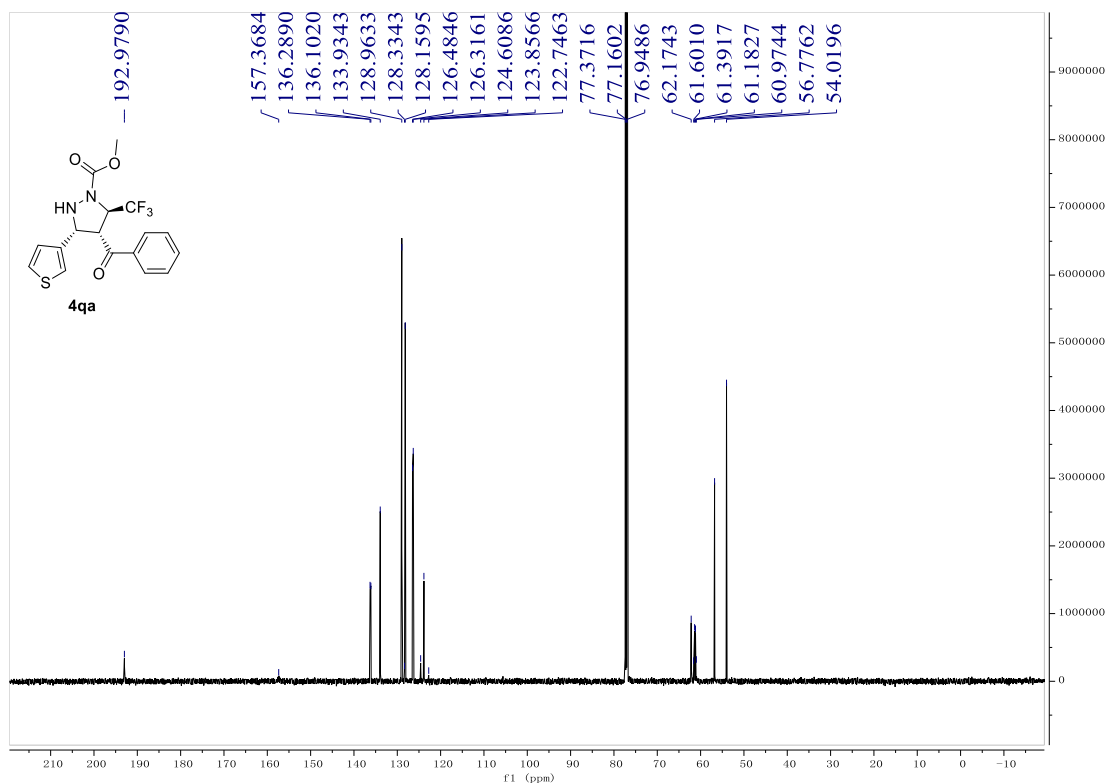

**<sup>19</sup>F{<sup>1</sup>H} NMR of 4qa (565 MHz, CDCl<sub>3</sub>)**

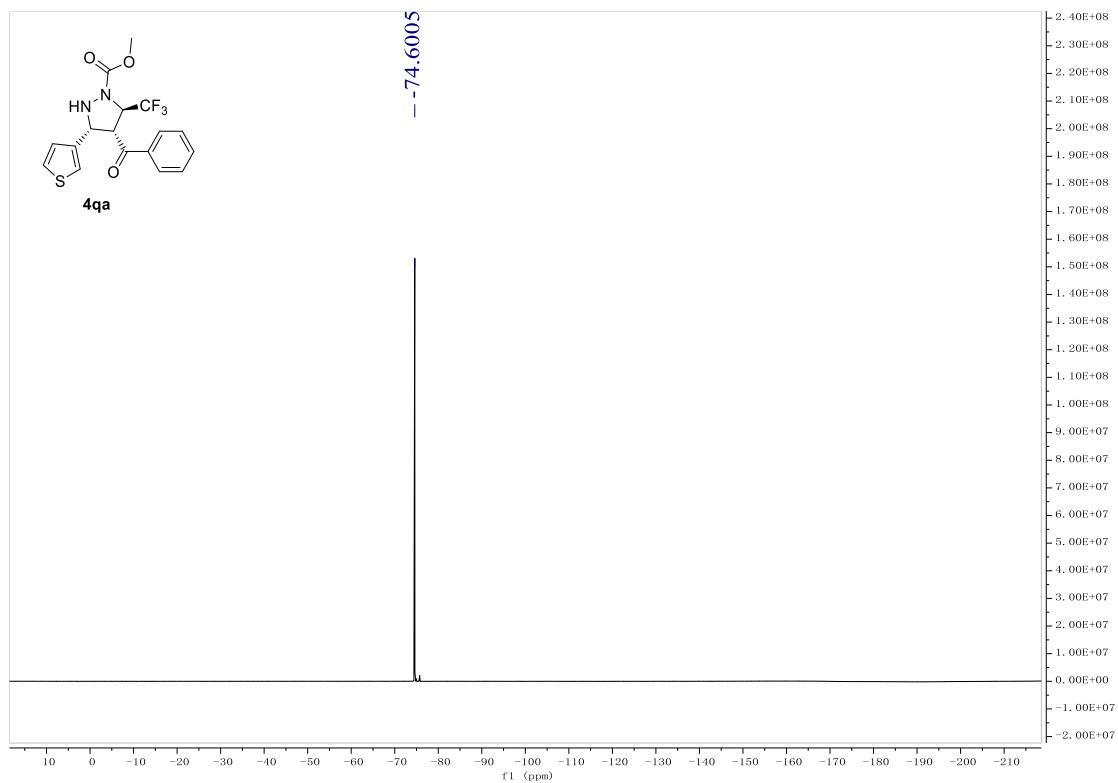

**<sup>1</sup>H NMR of 4ra (600 MHz, CDCl<sub>3</sub>)**

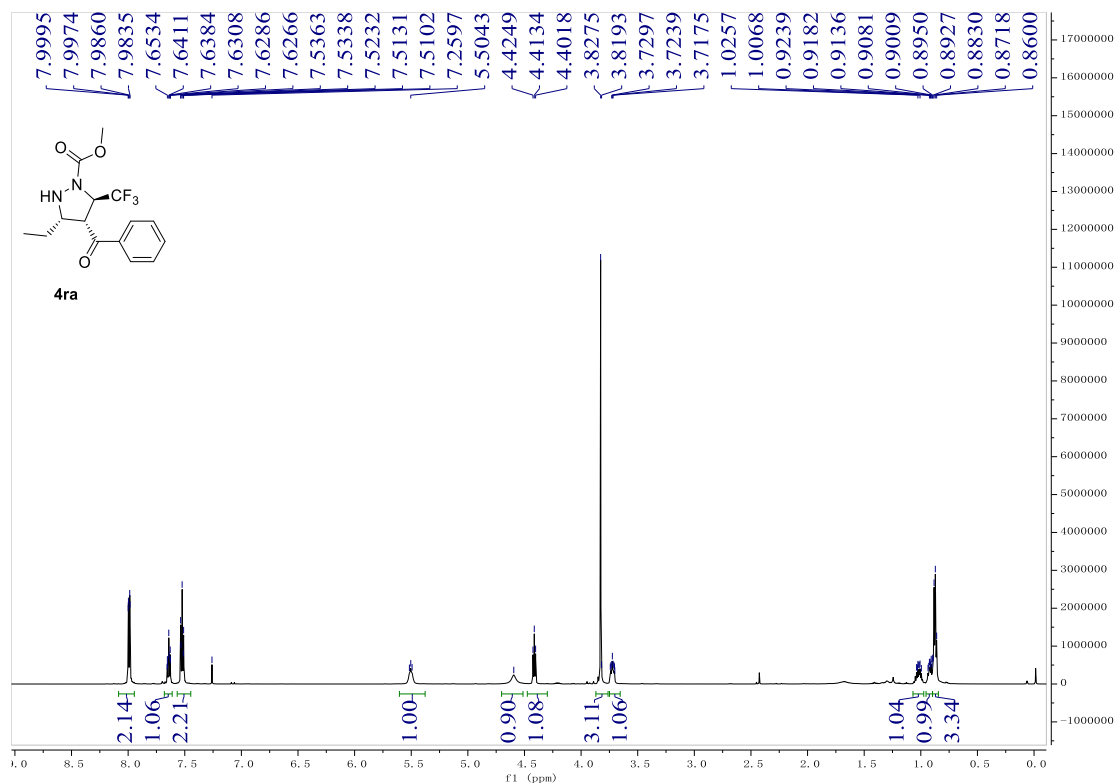

**<sup>13</sup>C{<sup>1</sup>H} NMR of 4ra (150 MHz, CDCl<sub>3</sub>)**

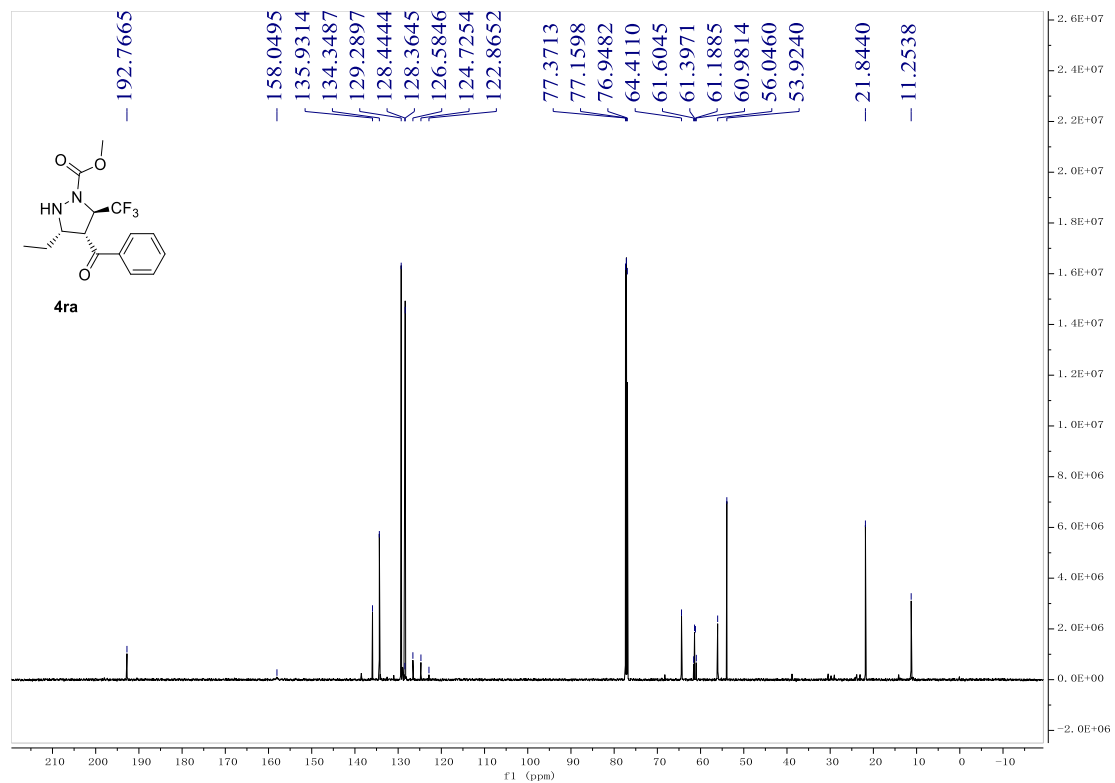

**<sup>19</sup>F{<sup>1</sup>H} NMR of 4ra (565 MHz, CDCl<sub>3</sub>)**

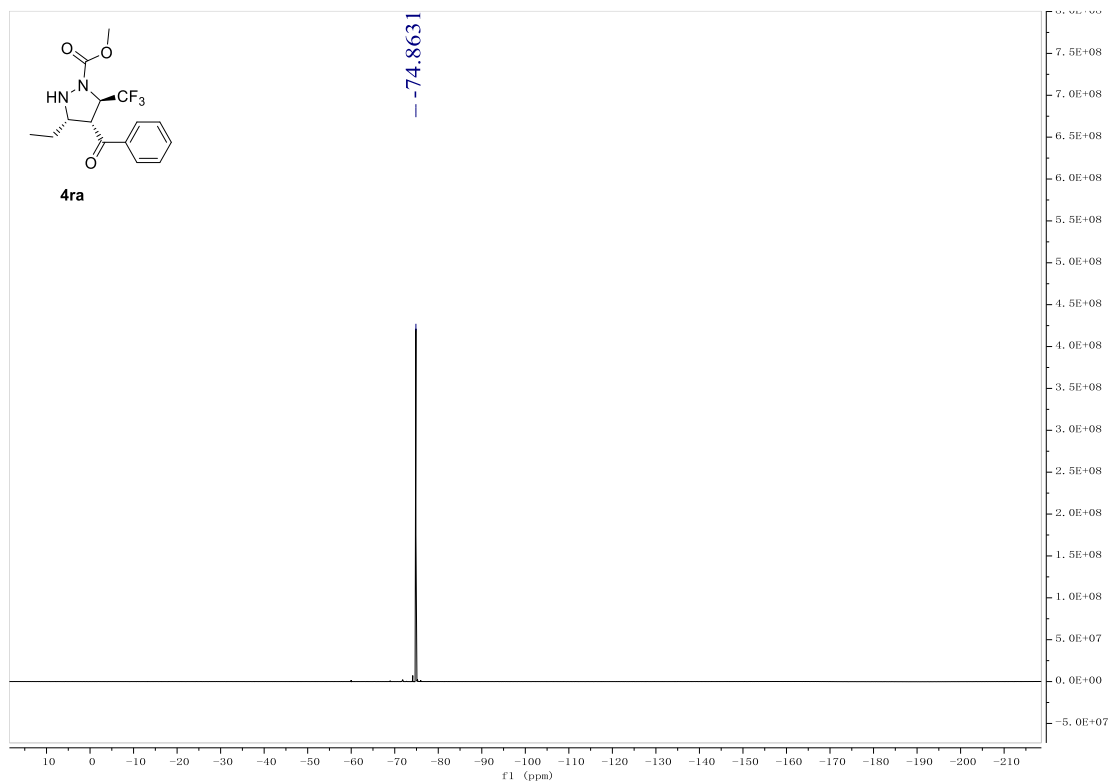

**$^1\text{H}$  NMR of 4sa (600 MHz,  $\text{CDCl}_3$ )**

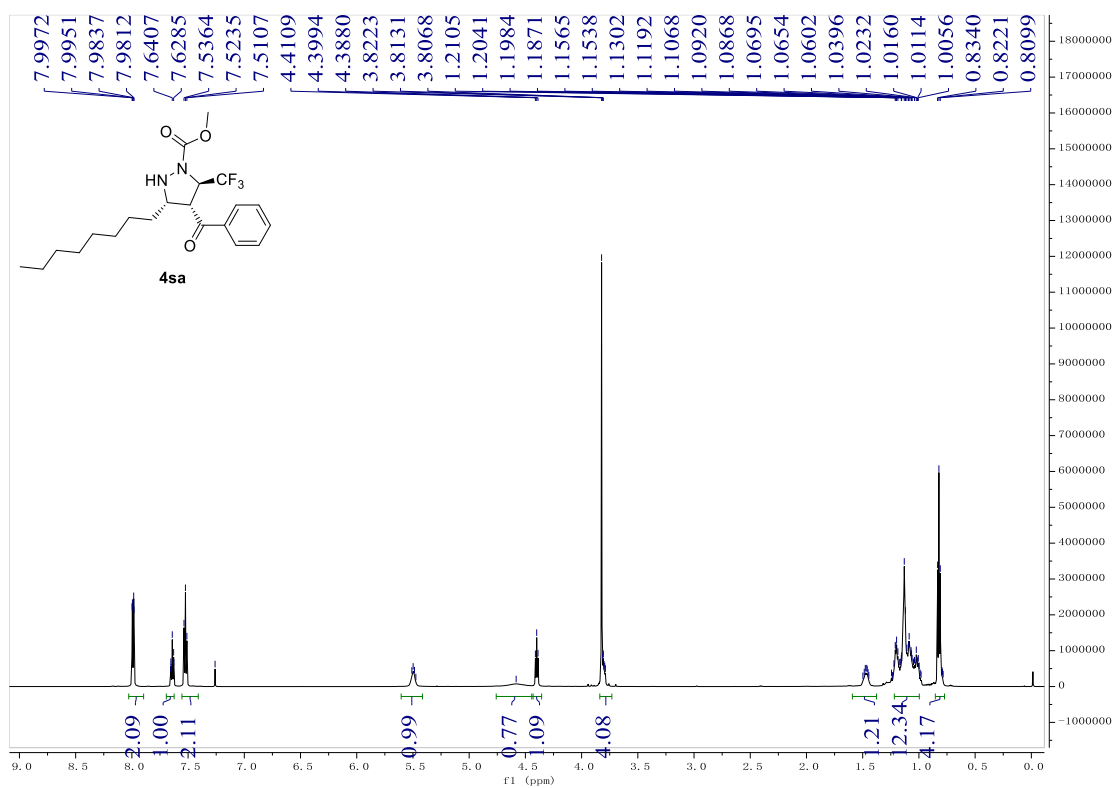

**$^{13}\text{C}\{^1\text{H}\}$  NMR of 4sa (150 MHz,  $\text{CDCl}_3$ )**

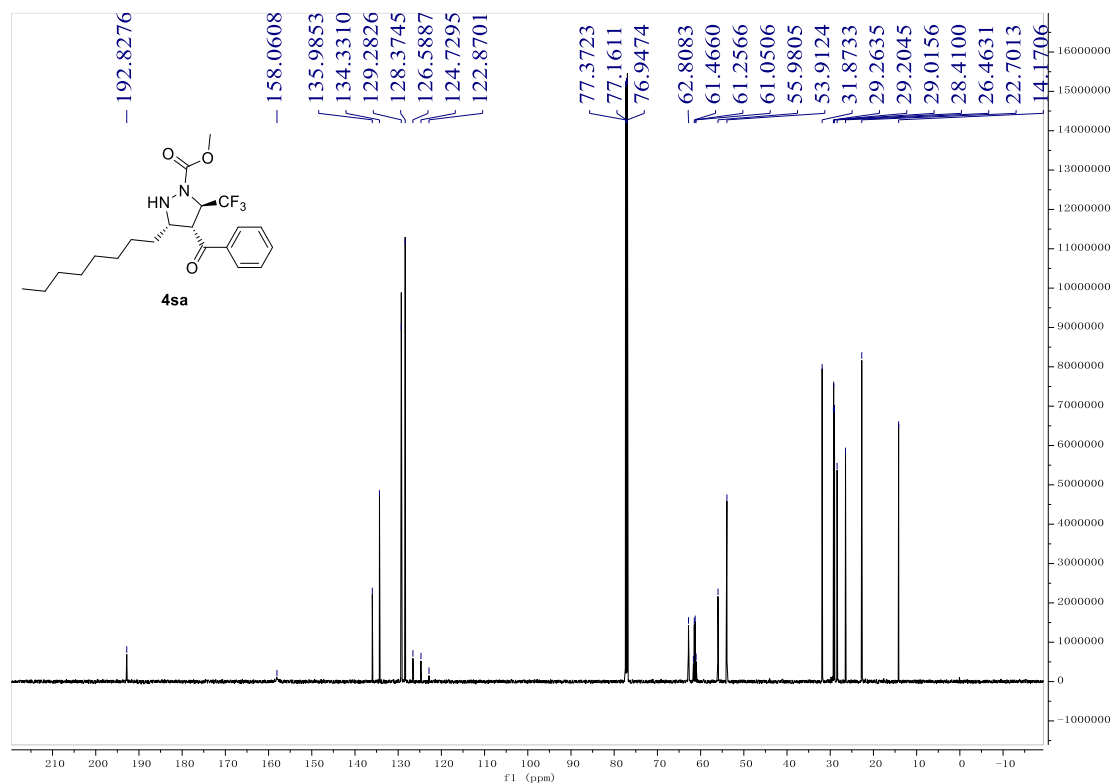

**<sup>19</sup>F{<sup>1</sup>H} NMR of 4sa (565 MHz, CDCl<sub>3</sub>)**

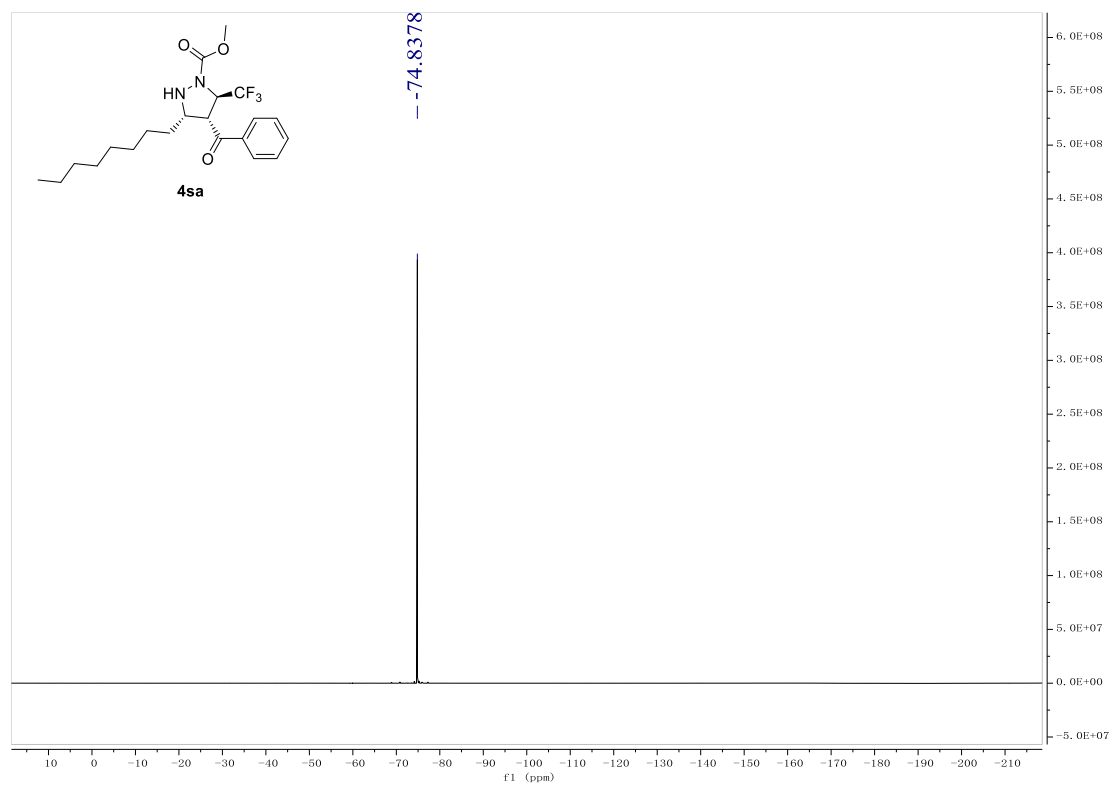

**<sup>1</sup>H NMR of 4ta (400 MHz, CDCl<sub>3</sub>)**



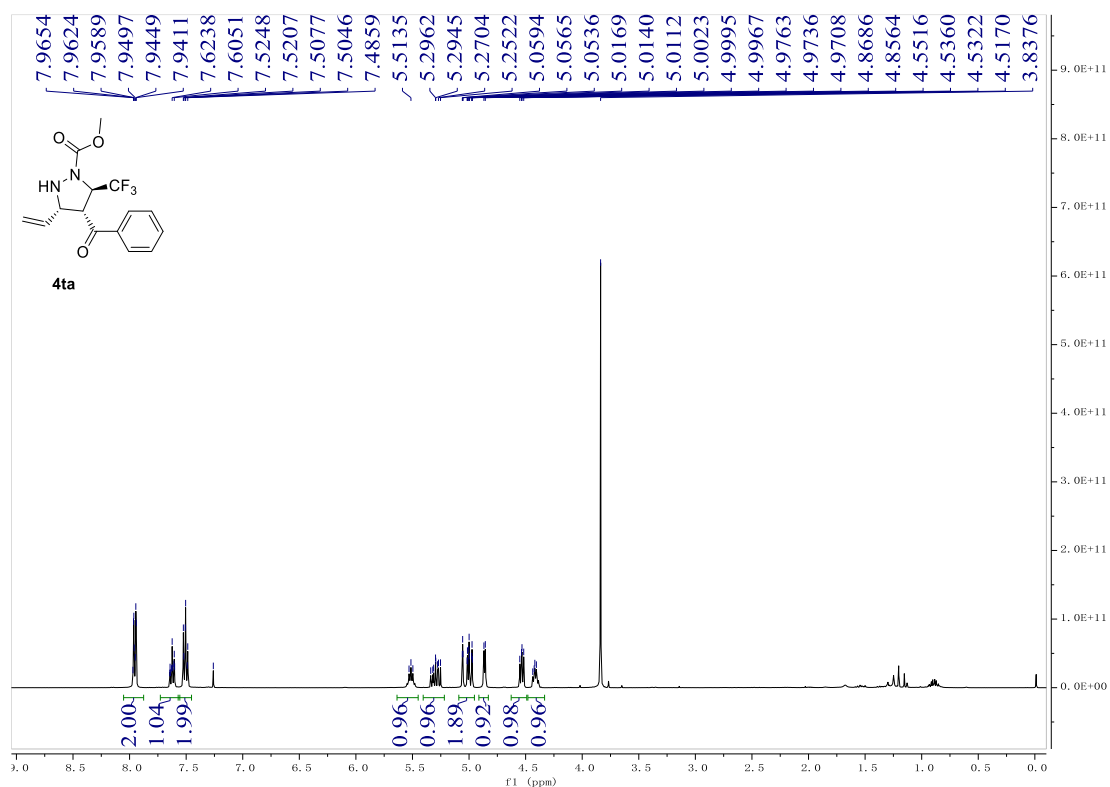

**<sup>13</sup>C{<sup>1</sup>H} NMR of 4ta (100 MHz, CDCl<sub>3</sub>)**

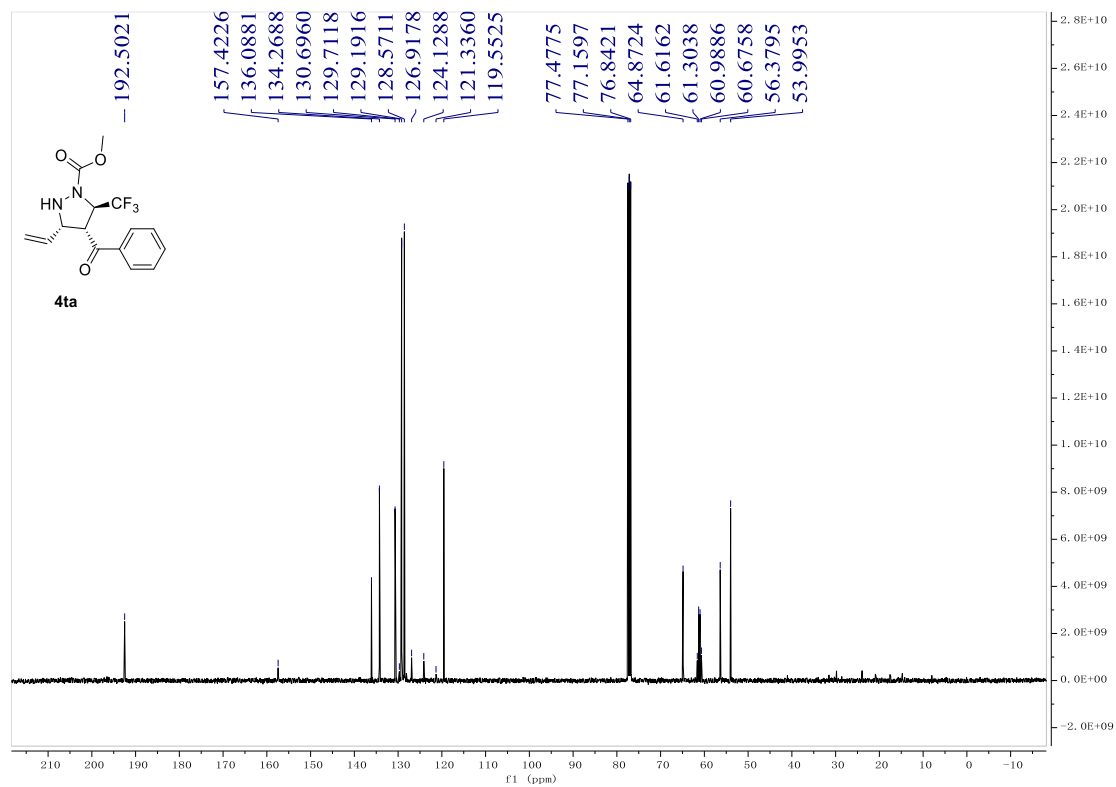

**<sup>19</sup>F{<sup>1</sup>H} NMR of 4ta (376 MHz, CDCl<sub>3</sub>)**

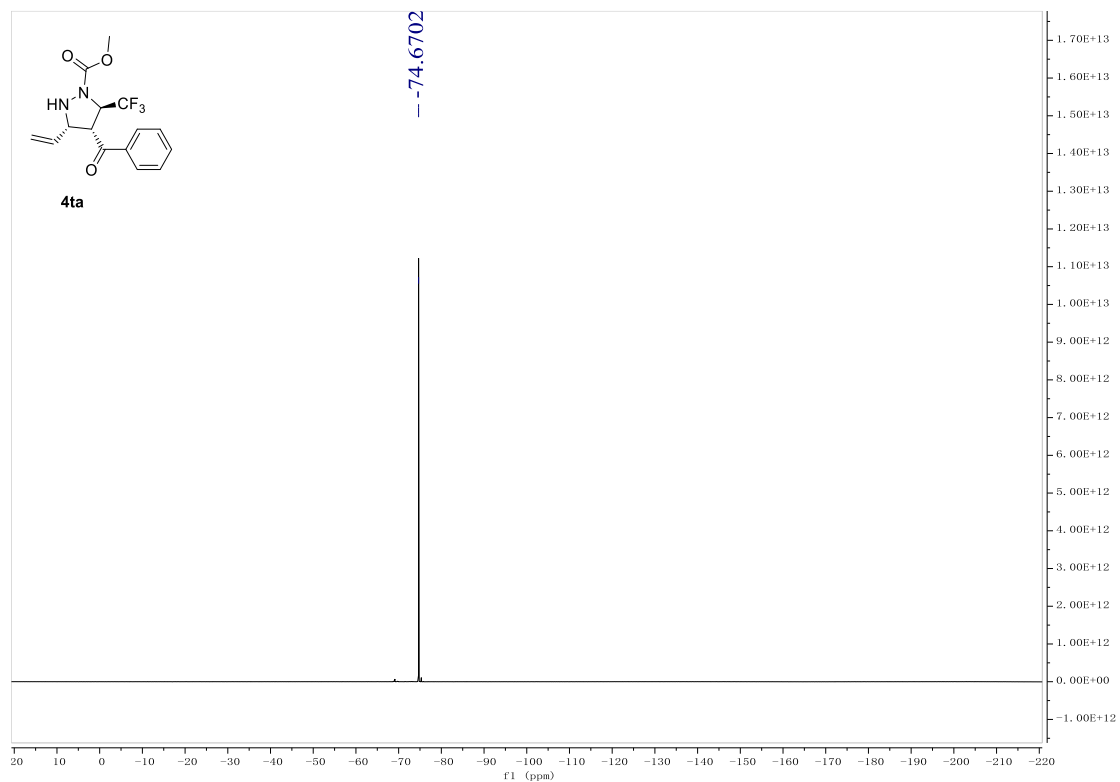

**$^1\text{H}$  NMR of 4ua (600 MHz,  $\text{CDCl}_3$ )**

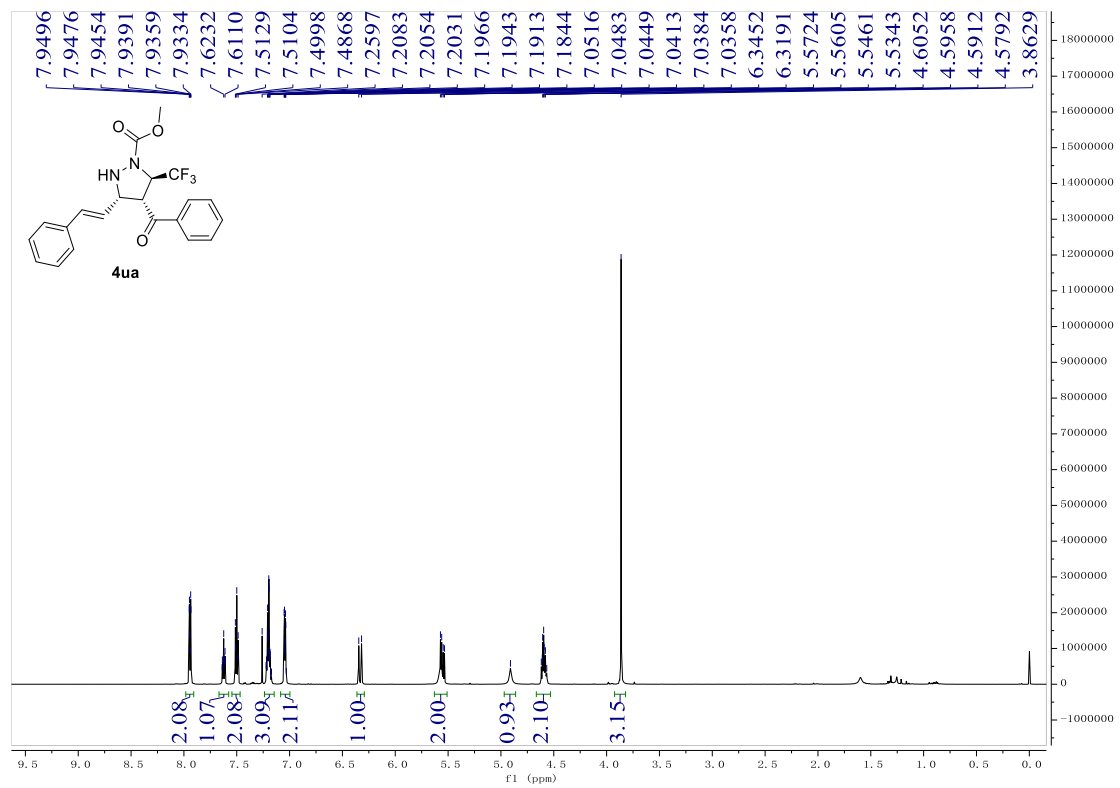

**$^{13}\text{C}\{^1\text{H}\}$  NMR of 4ua (150 MHz,  $\text{CDCl}_3$ )**

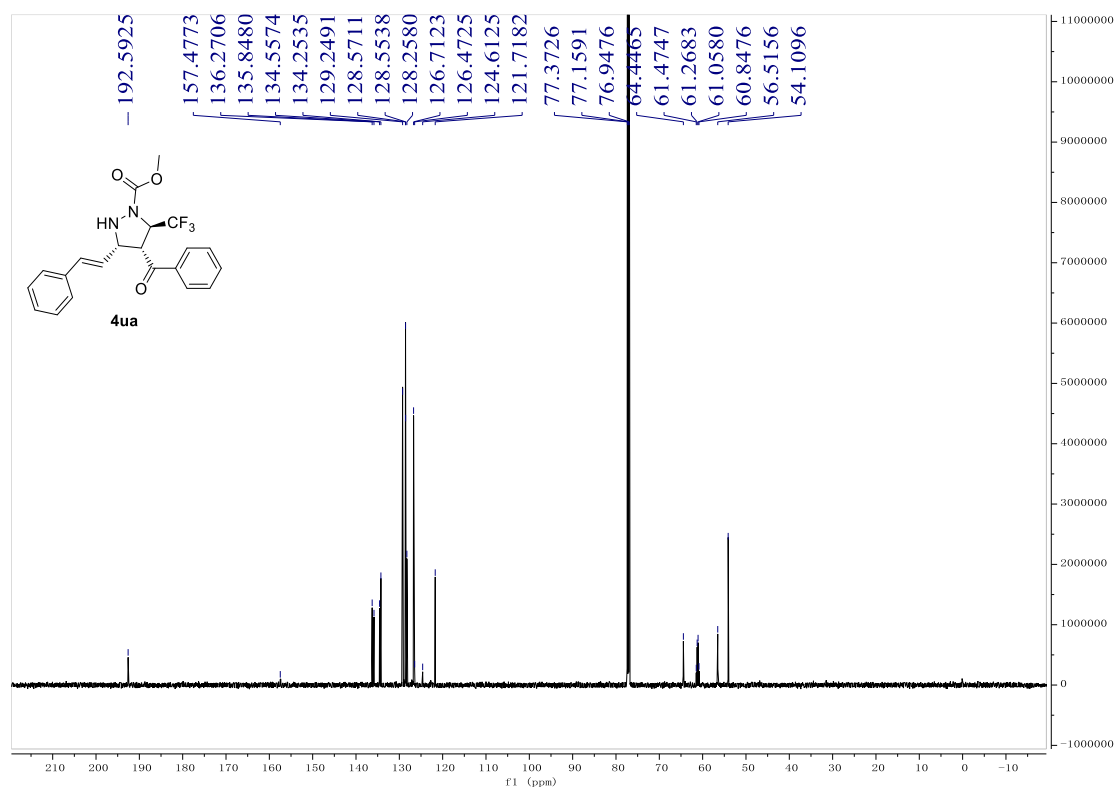

**<sup>19</sup>F{<sup>1</sup>H} NMR of 4ua (565 MHz, CDCl<sub>3</sub>)**

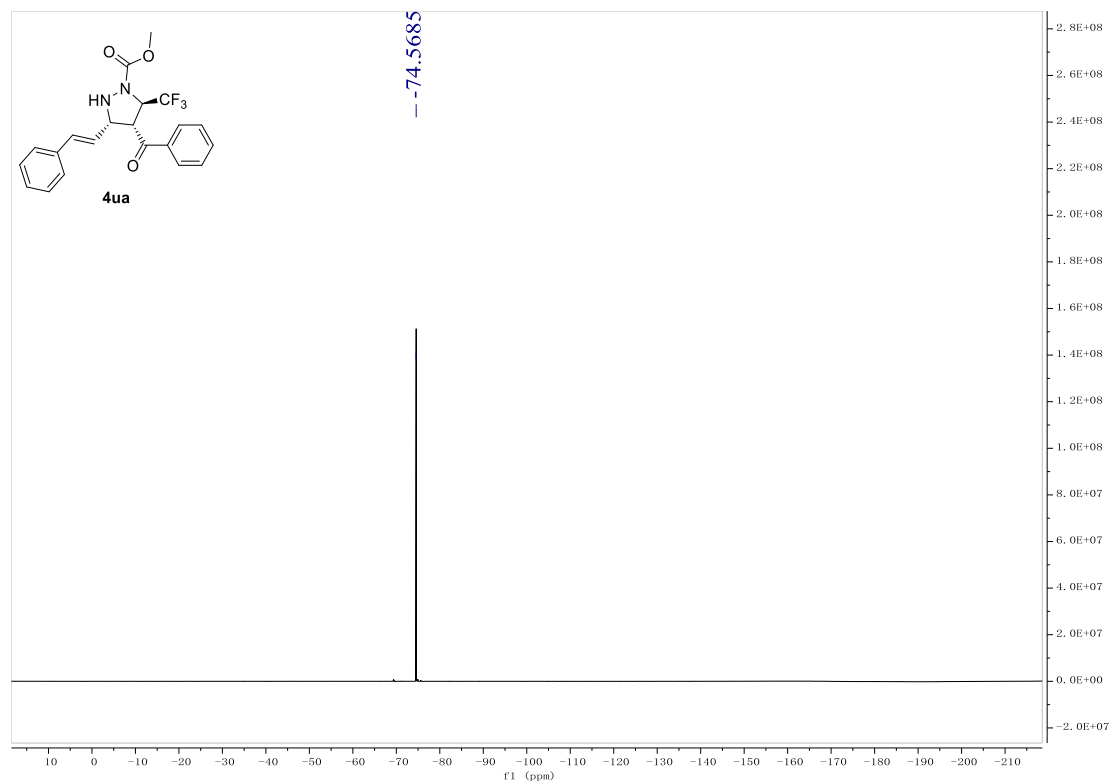

**<sup>1</sup>H NMR of 4va (400 MHz, CDCl<sub>3</sub>)**

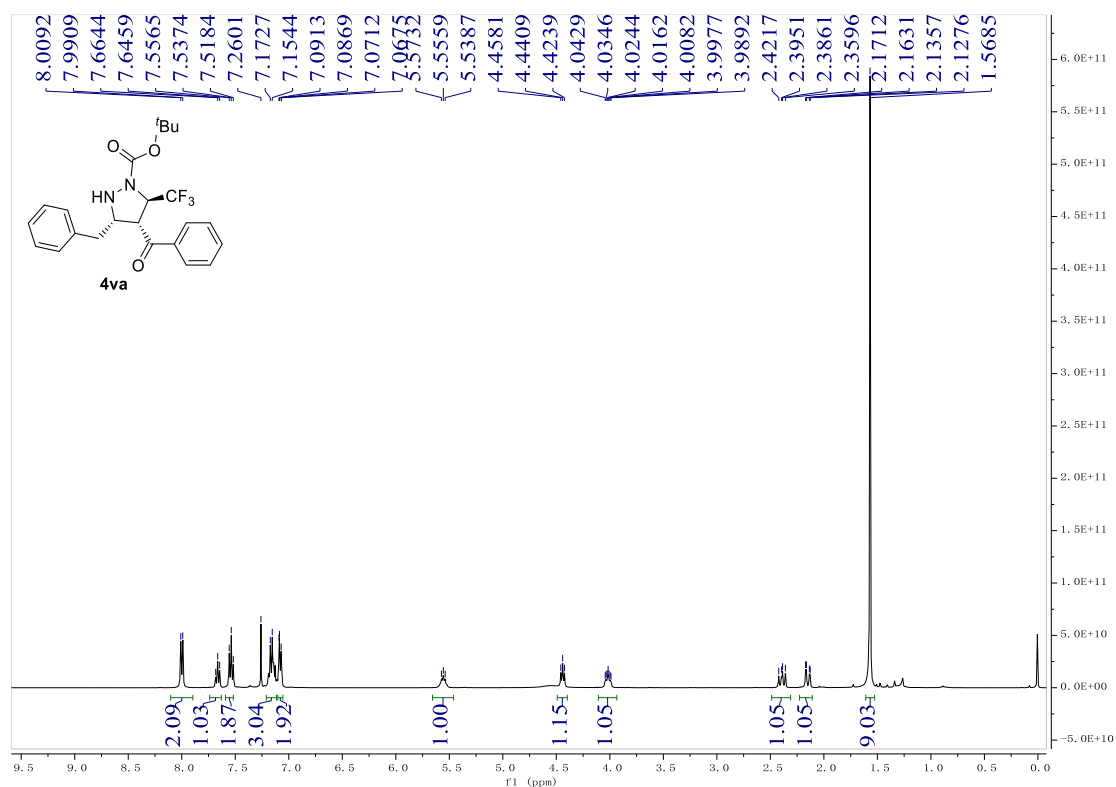

**<sup>13</sup>C{<sup>1</sup>H} NMR of 4va (100 MHz, CDCl<sub>3</sub>)**

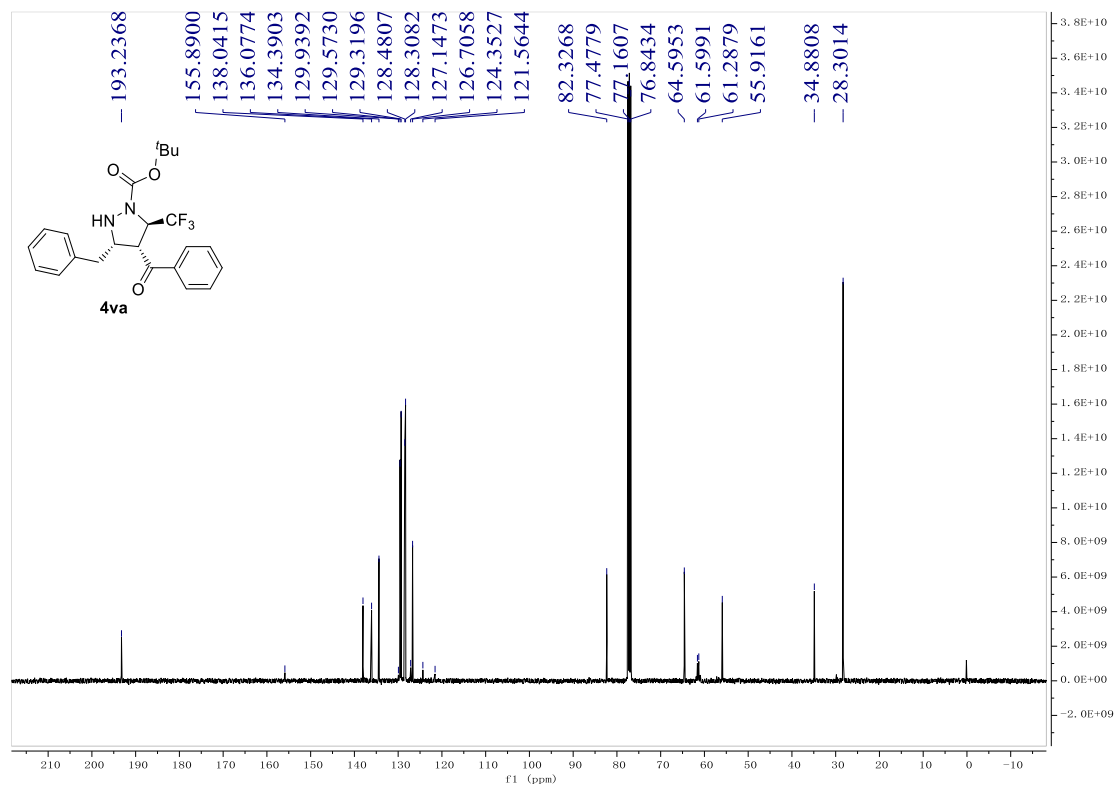

**<sup>19</sup>F{<sup>1</sup>H} NMR of 4va (376 MHz, CDCl<sub>3</sub>)**

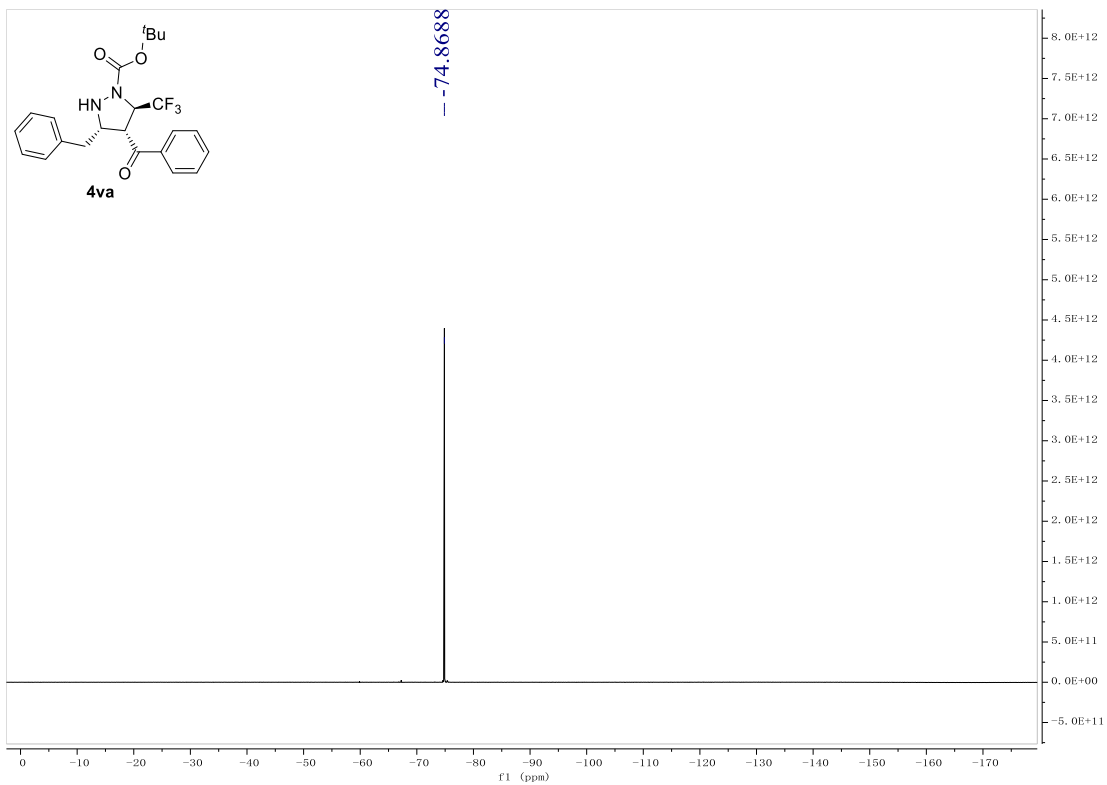

**<sup>1</sup>H NMR of 4wa (400 MHz, CDCl<sub>3</sub>)**

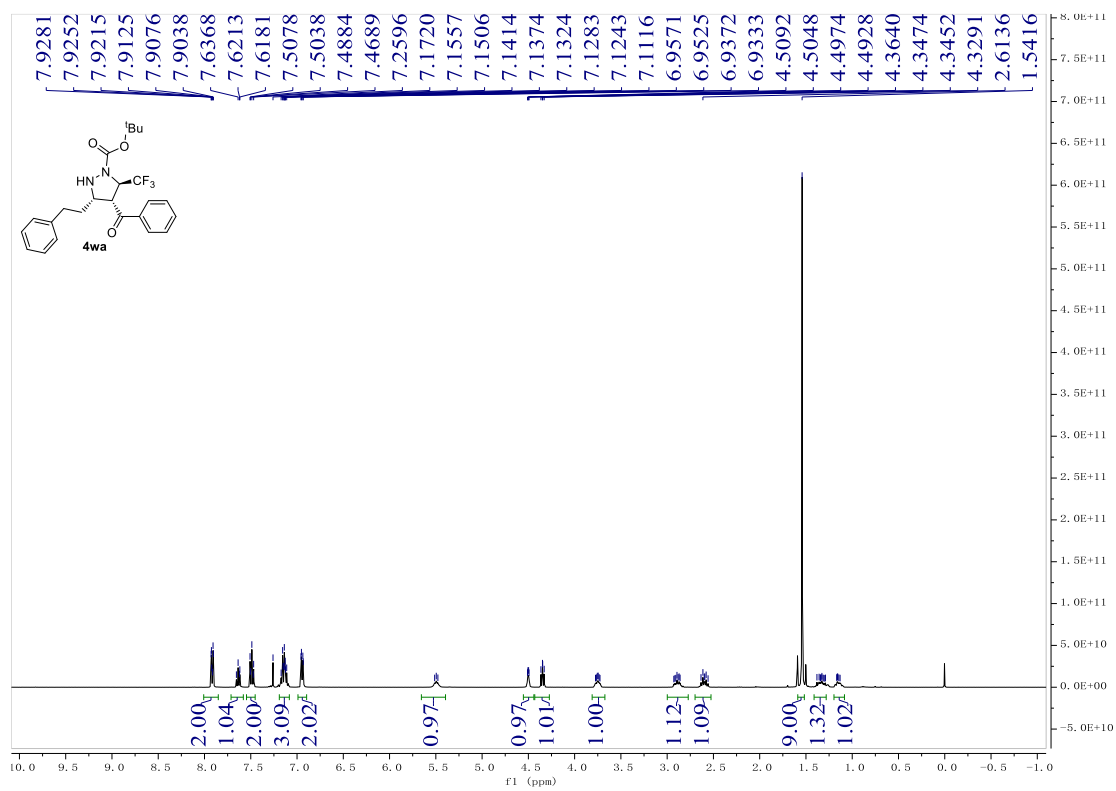

**<sup>13</sup>C{<sup>1</sup>H} NMR of 4wa (100 MHz, CDCl<sub>3</sub>)**

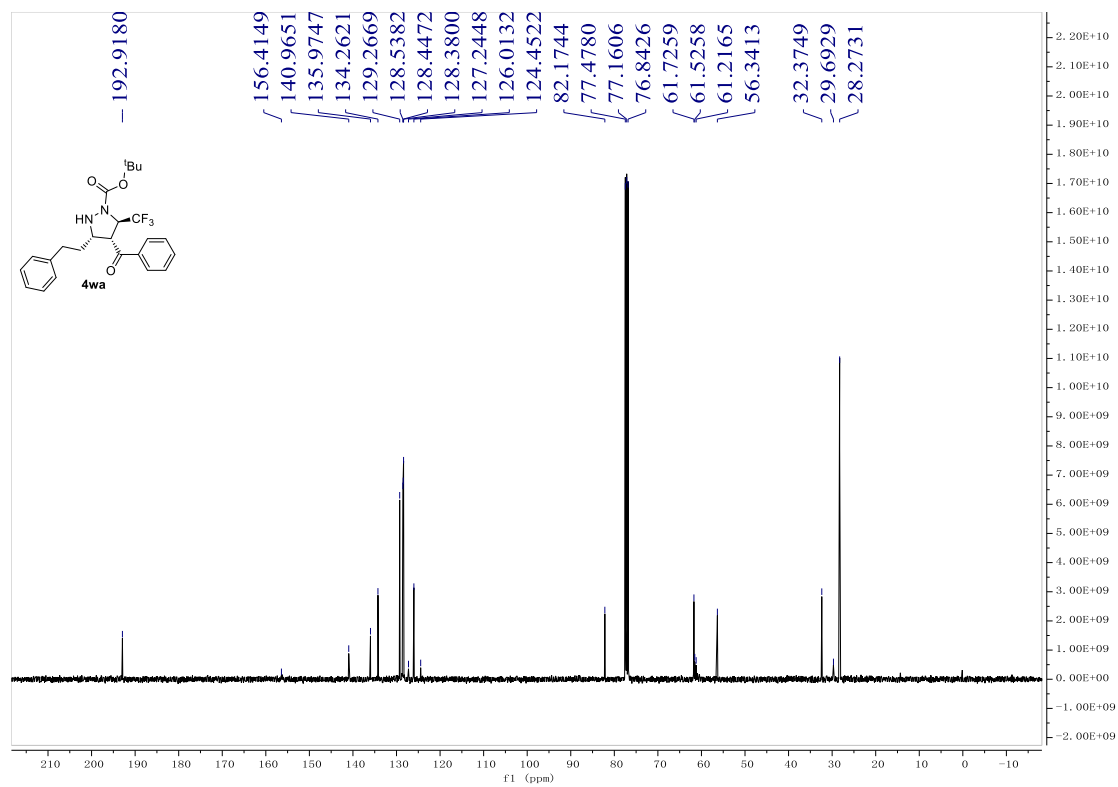

**<sup>19</sup>F{<sup>1</sup>H} NMR of 4wa (376 MHz, CDCl<sub>3</sub>)**

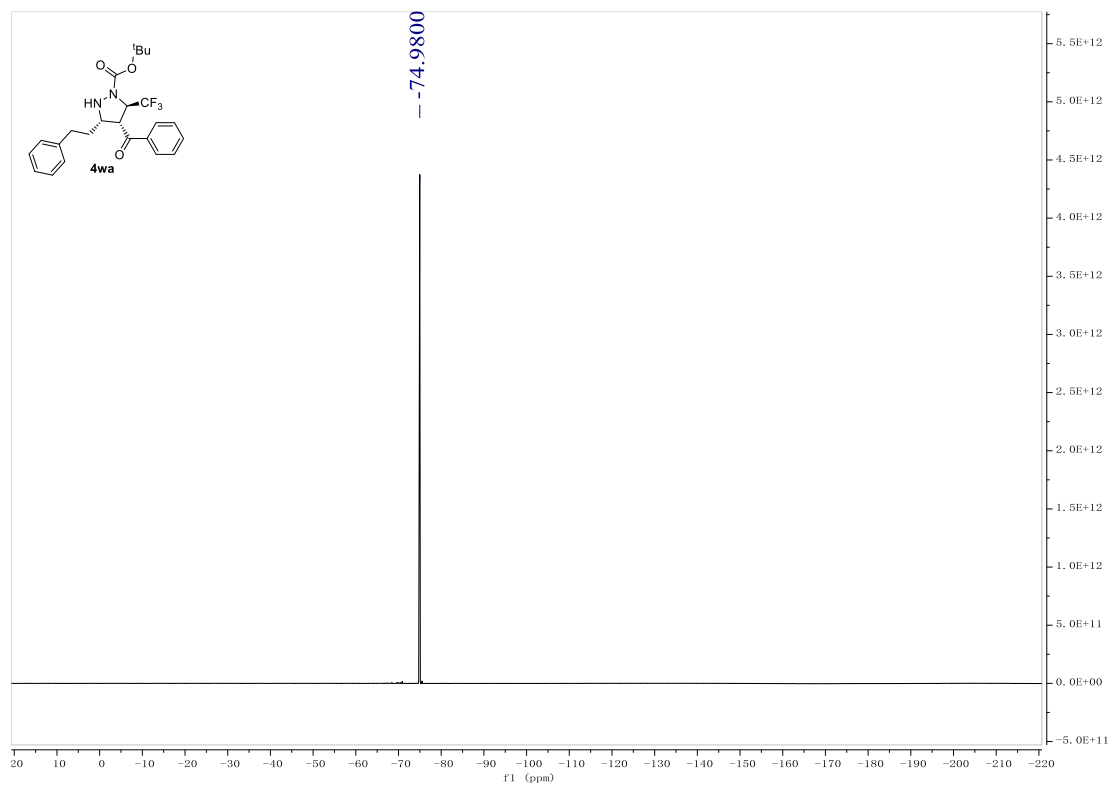

**<sup>1</sup>H NMR of 4xa (400 MHz, CDCl<sub>3</sub>)**

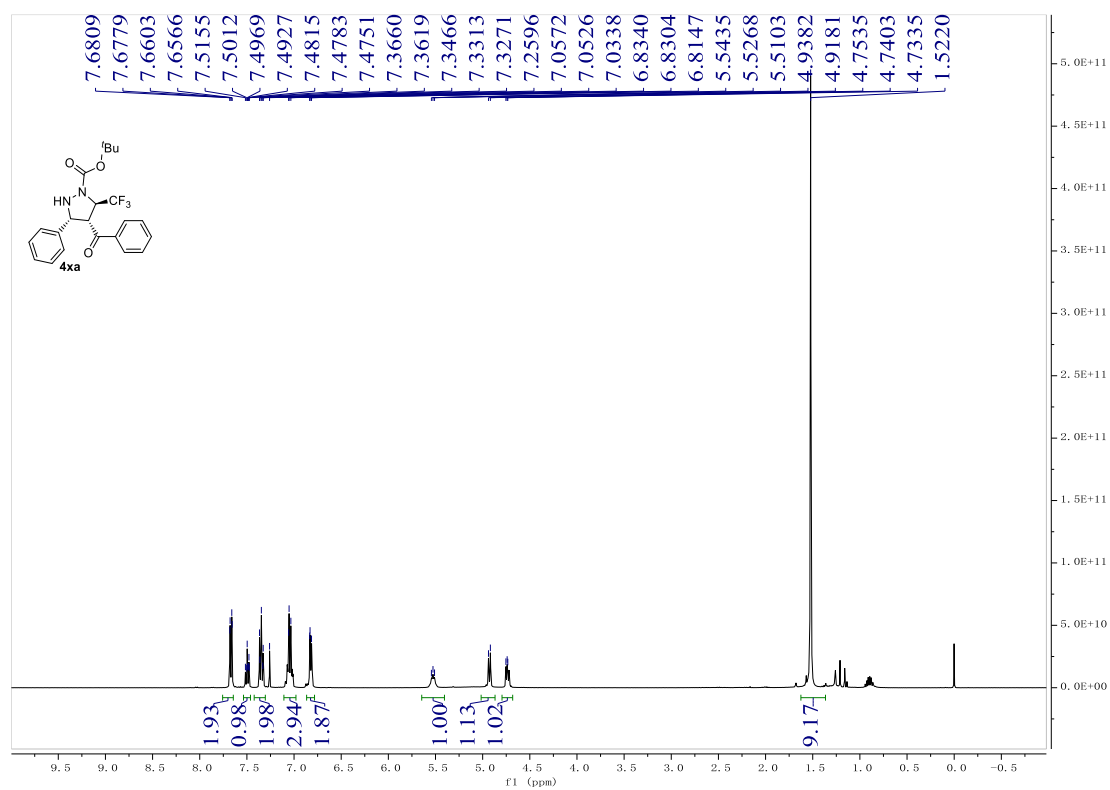

**<sup>13</sup>C{<sup>1</sup>H} NMR of 4xa (100 MHz, CDCl<sub>3</sub>)**

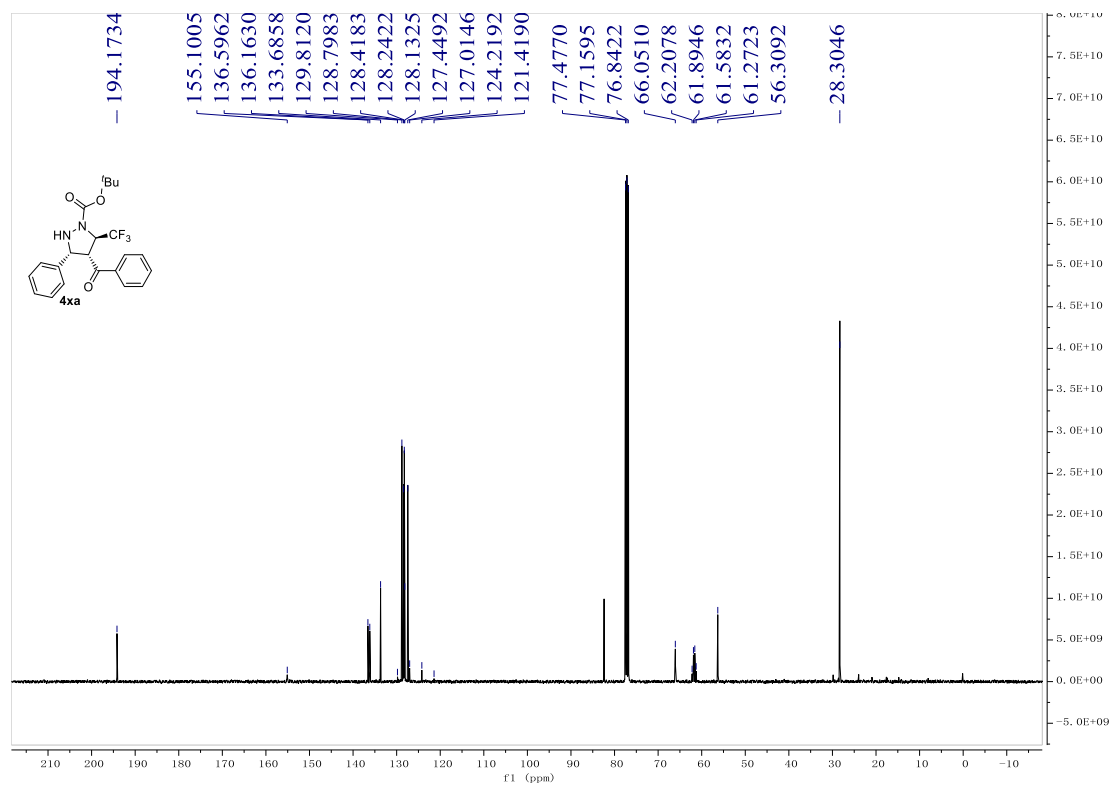

**<sup>19</sup>F{<sup>1</sup>H} NMR of 4xa (376 MHz, CDCl<sub>3</sub>)**

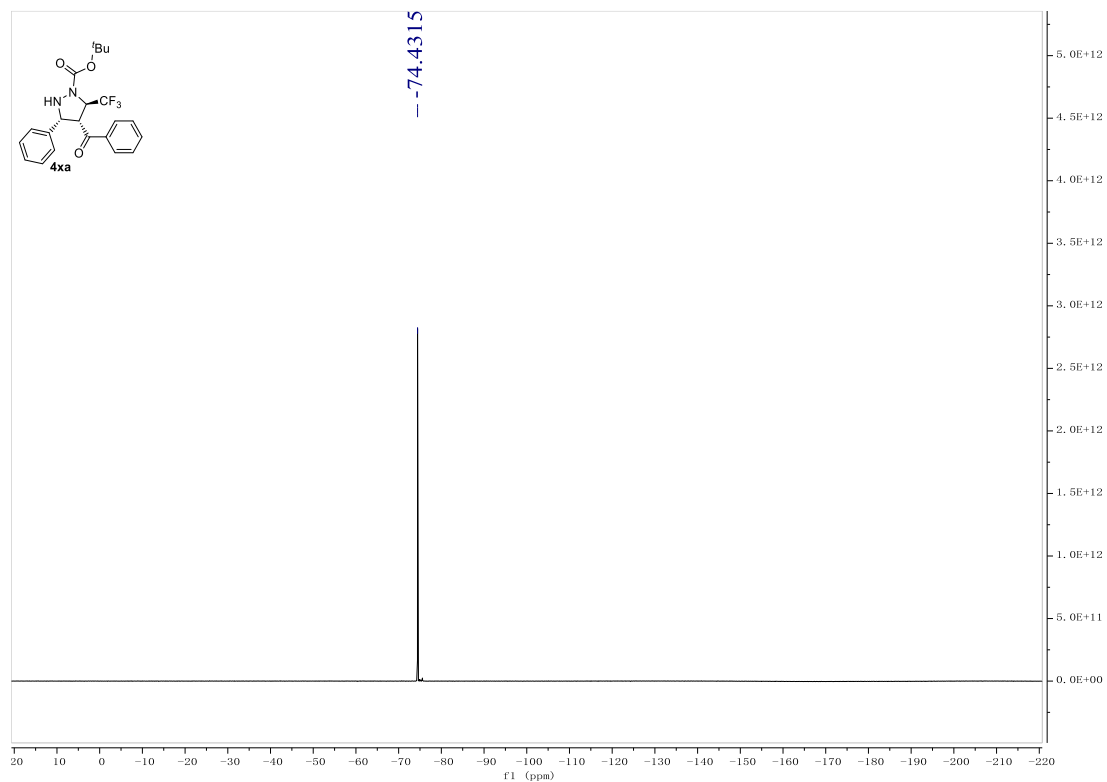

**<sup>1</sup>H NMR of 5aa (400 MHz, CDCl<sub>3</sub>)**

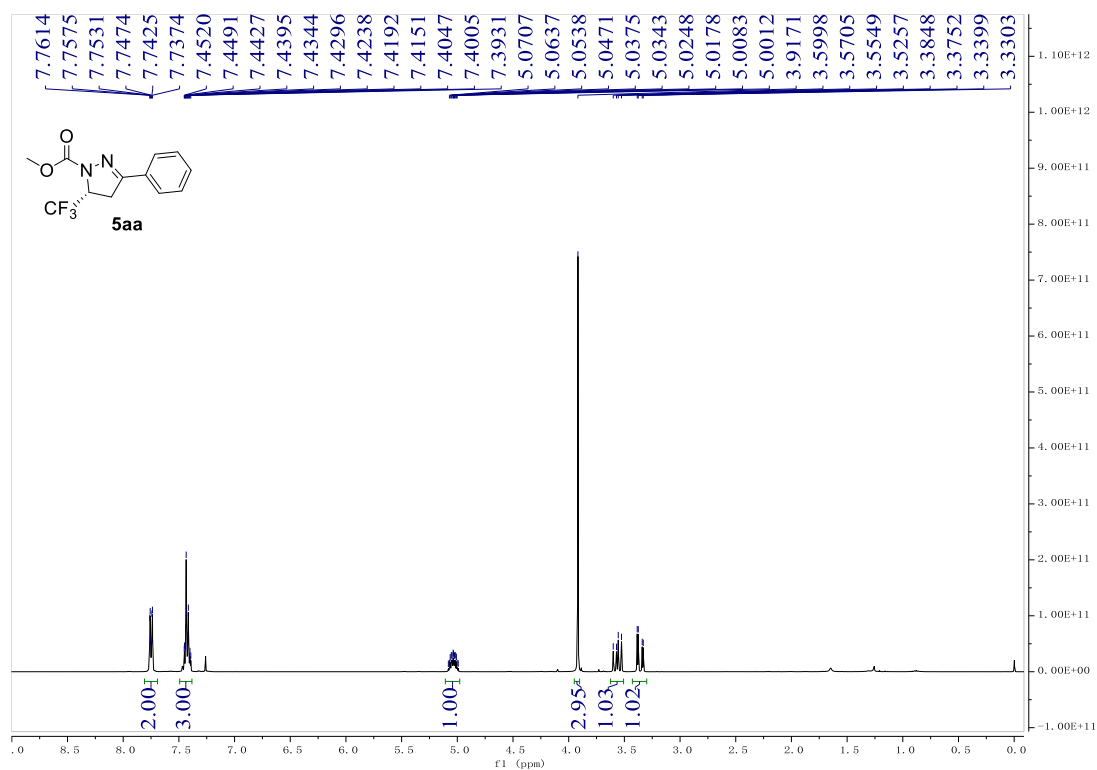

**<sup>13</sup>C{<sup>1</sup>H} NMR of 5aa (100 MHz, CDCl<sub>3</sub>)**



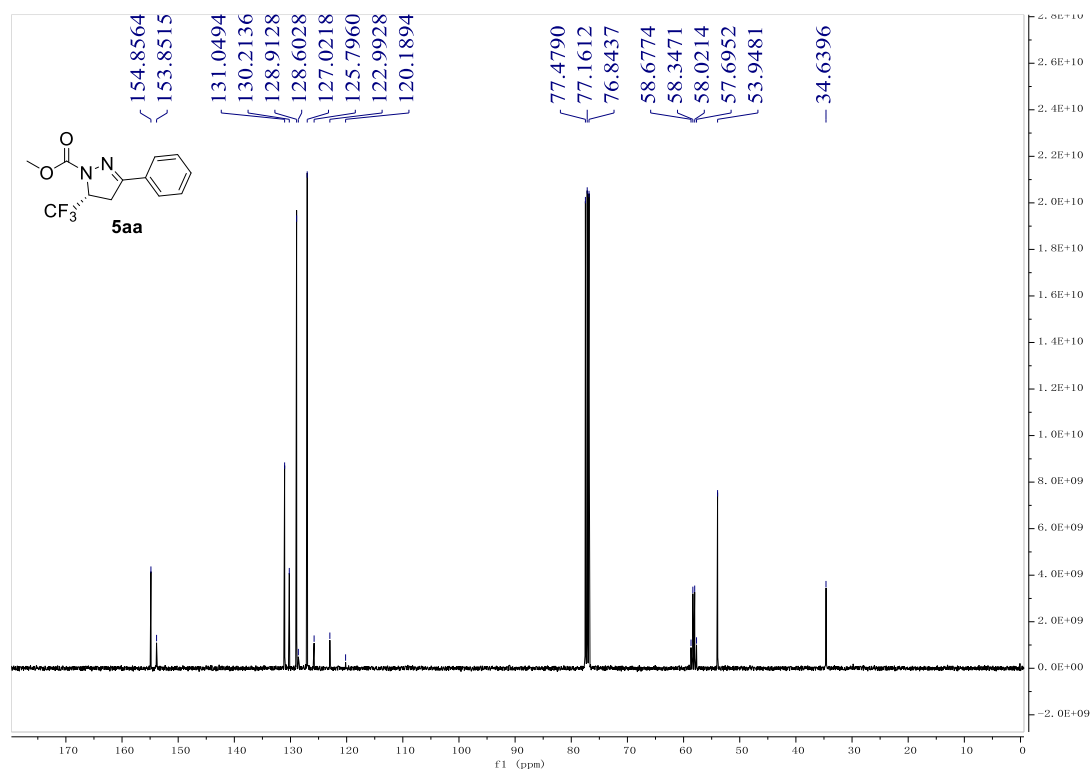

**<sup>19</sup>F{<sup>1</sup>H} NMR of 5aa (376 MHz, CDCl<sub>3</sub>)**

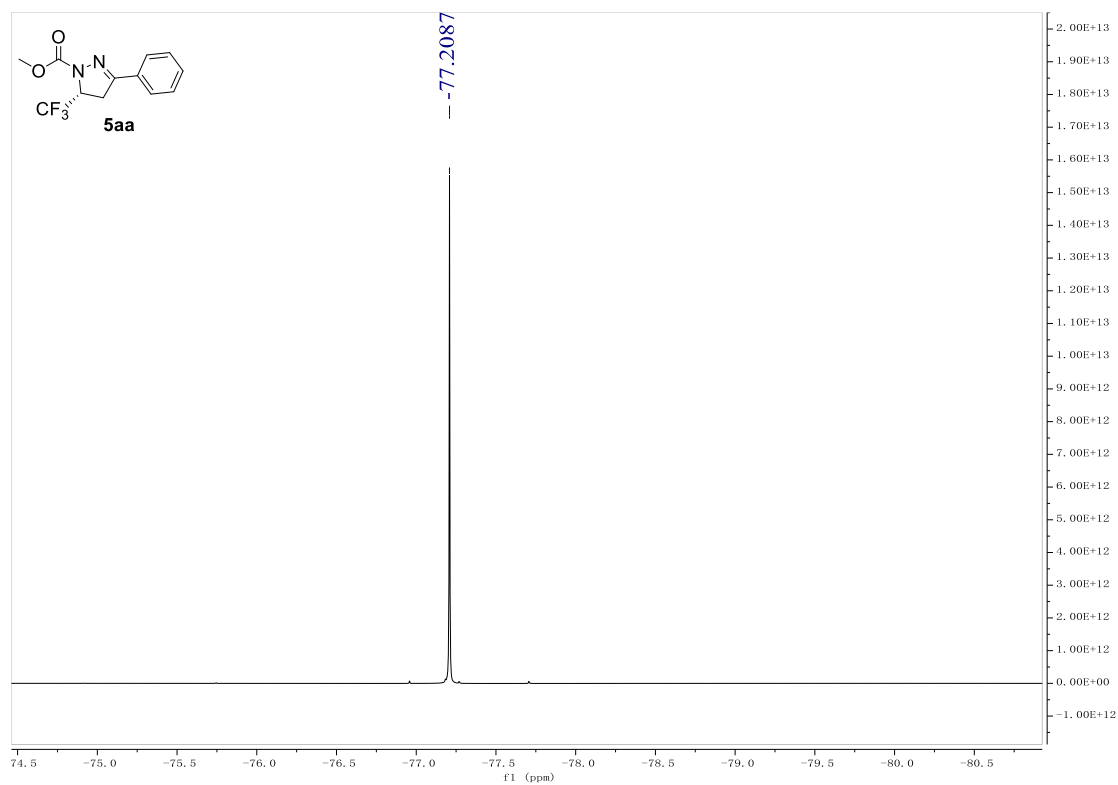

**<sup>1</sup>H NMR of 5ab (600 MHz, CDCl<sub>3</sub>)**

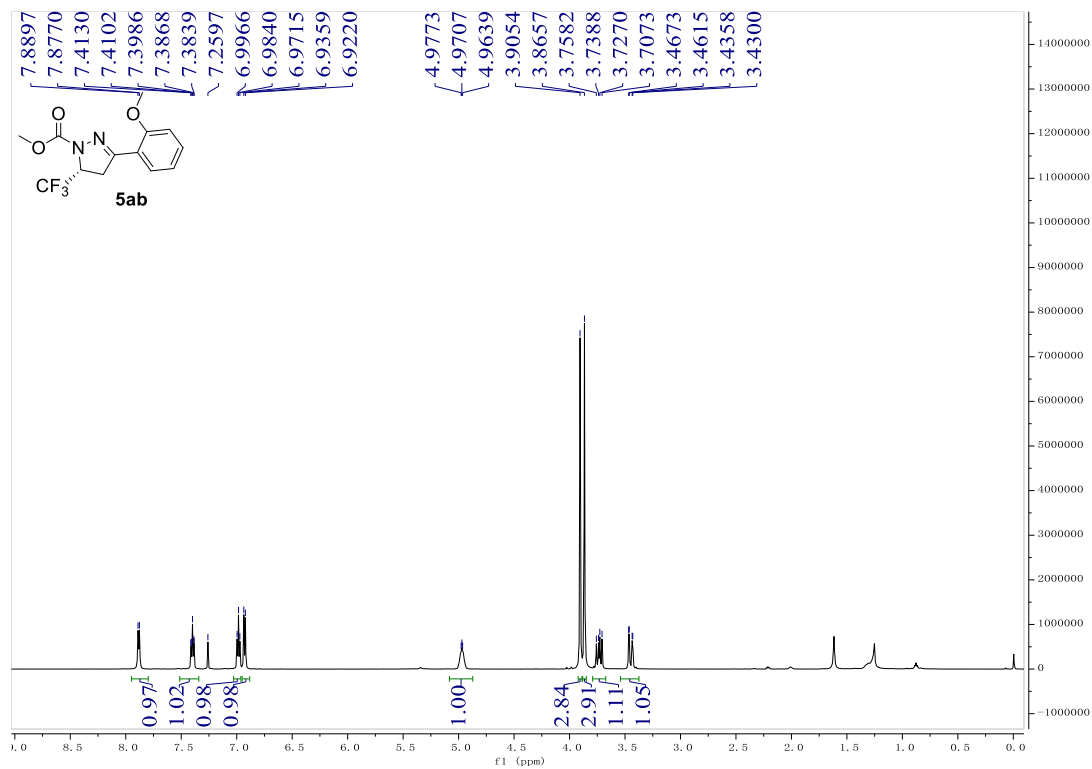

**<sup>13</sup>C{<sup>1</sup>H} NMR of 5ab (150 MHz, CDCl<sub>3</sub>)**

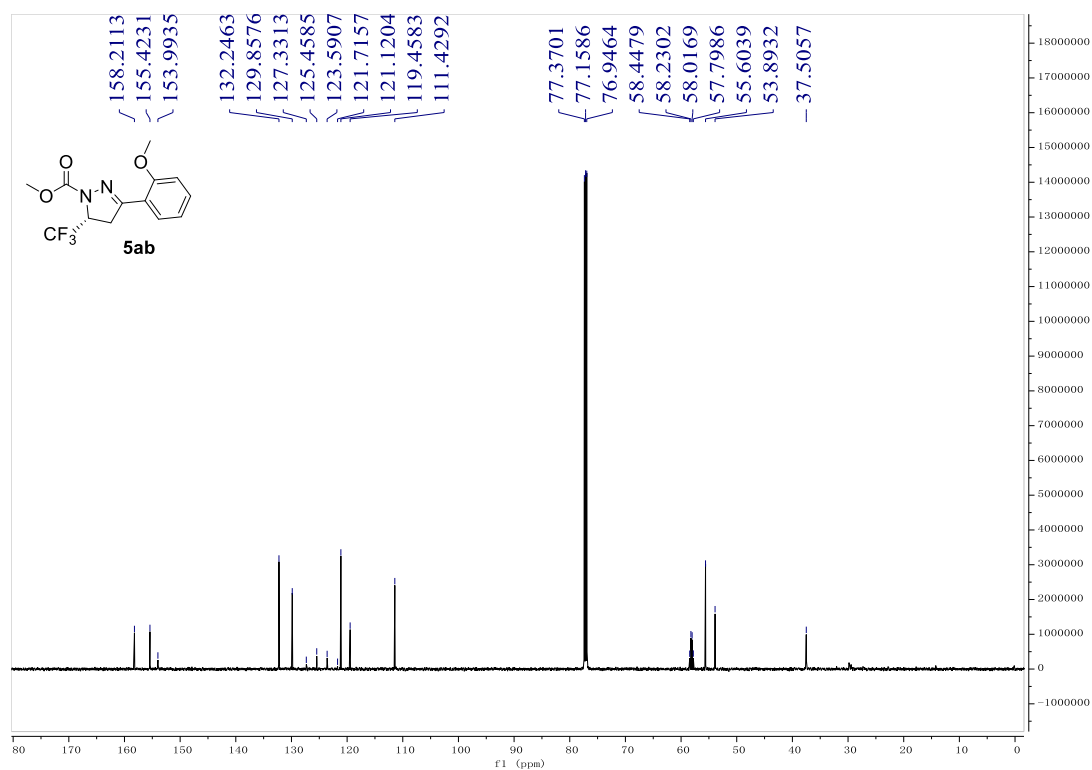

**<sup>19</sup>F{<sup>1</sup>H} NMR of 5ab (565 MHz, CDCl<sub>3</sub>)**

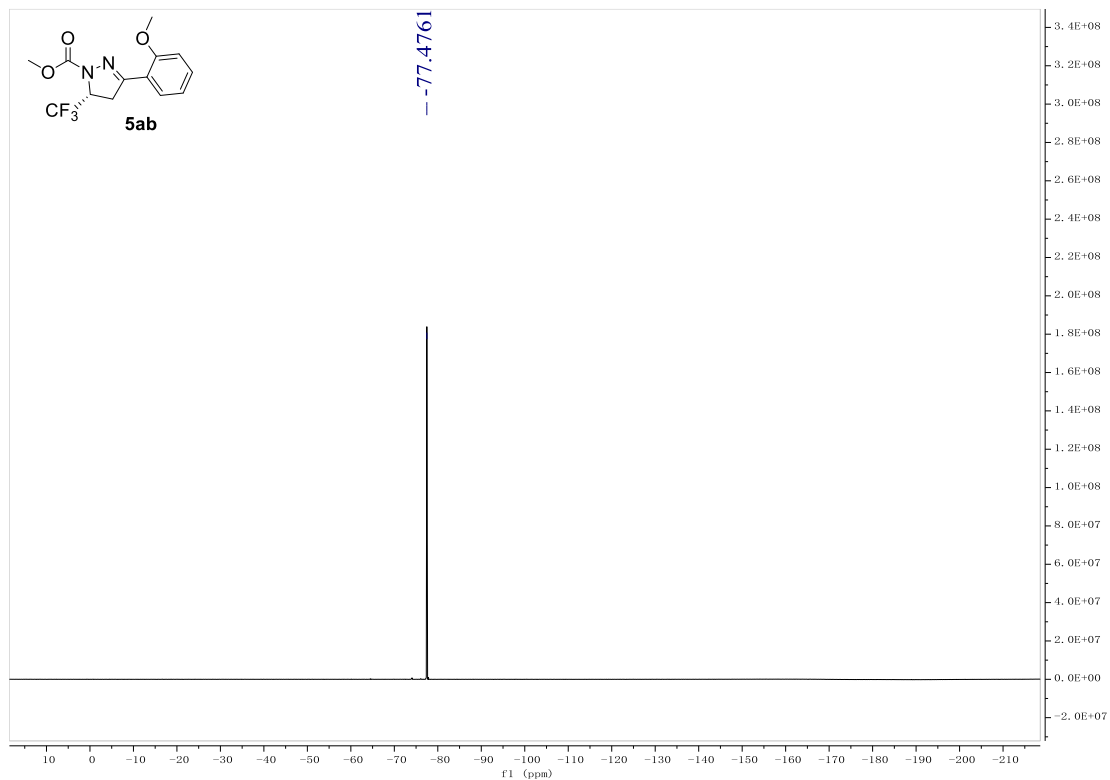

**<sup>1</sup>H NMR of 5ac (600 MHz, CDCl<sub>3</sub>)**

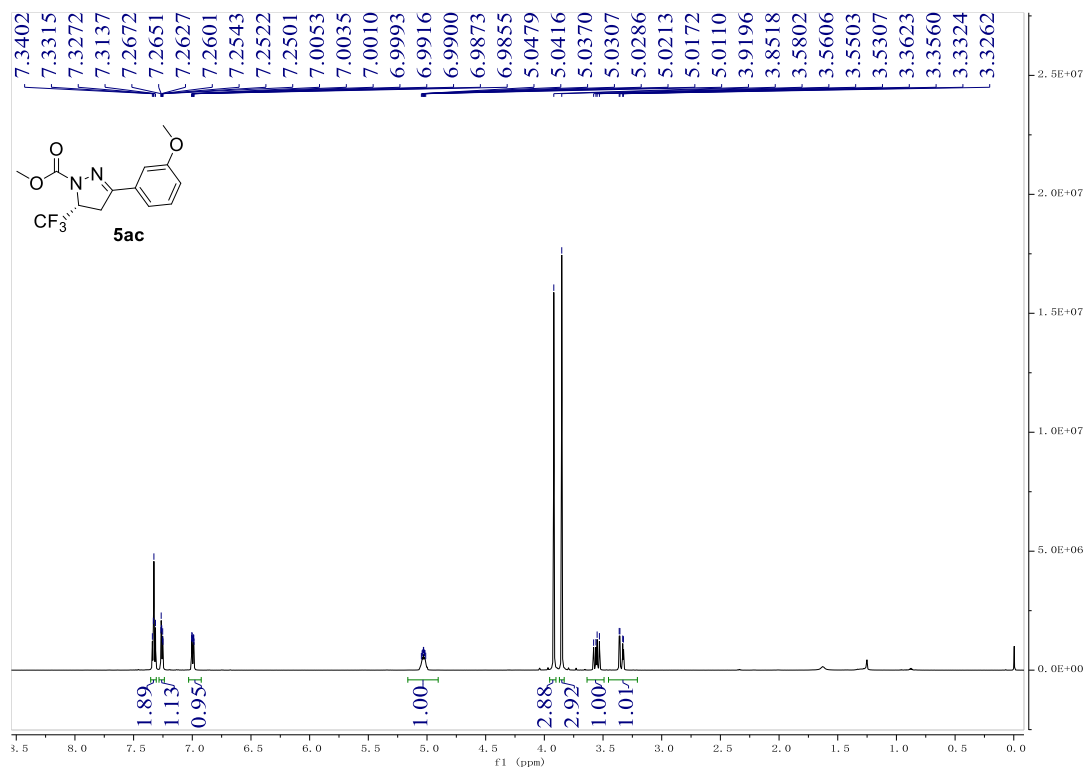

**$^{13}\text{C}\{^1\text{H}\}$  NMR of 5ac (150 MHz,  $\text{CDCl}_3$ )**

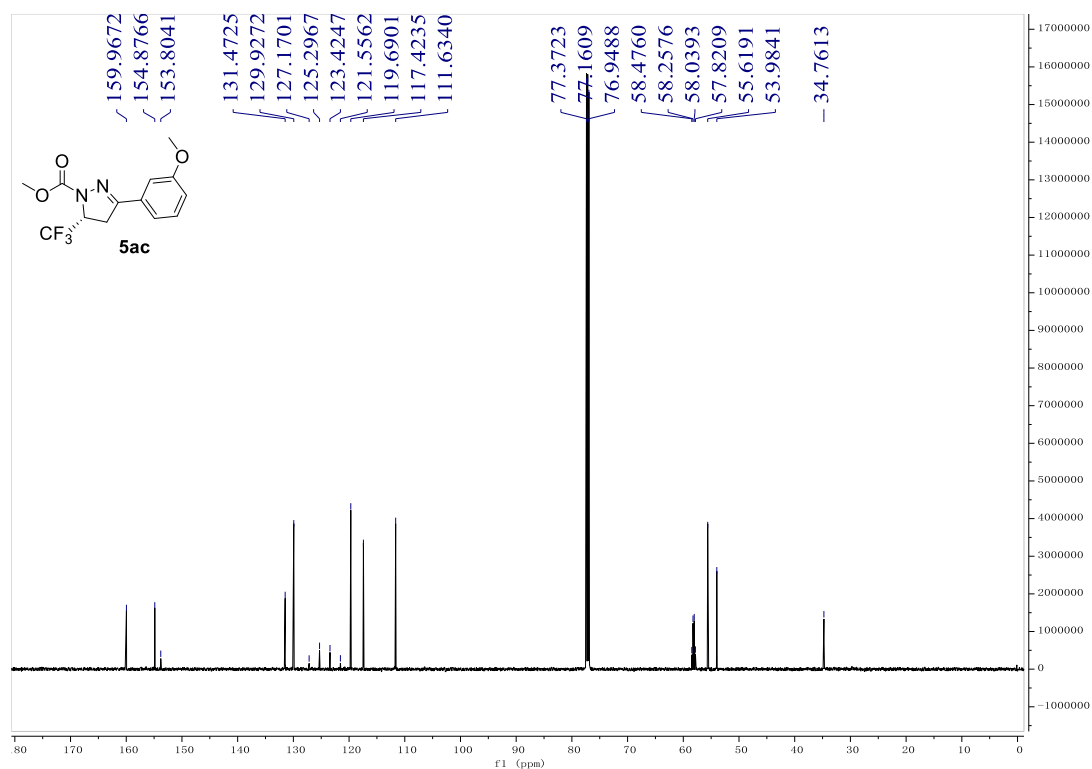

**$^{19}\text{F}\{^1\text{H}\}$  NMR of 5ac (565 MHz,  $\text{CDCl}_3$ )**

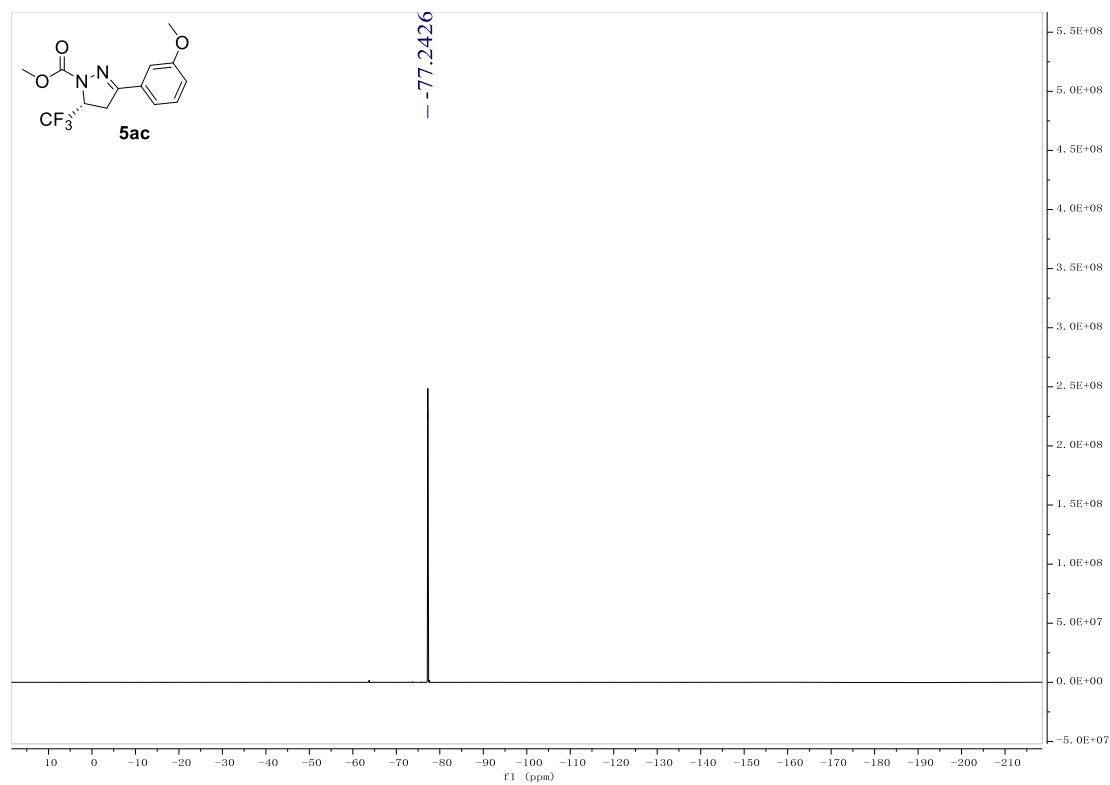

### $^1\text{H}$ NMR of 5ad (600 MHz, $\text{CDCl}_3$ )

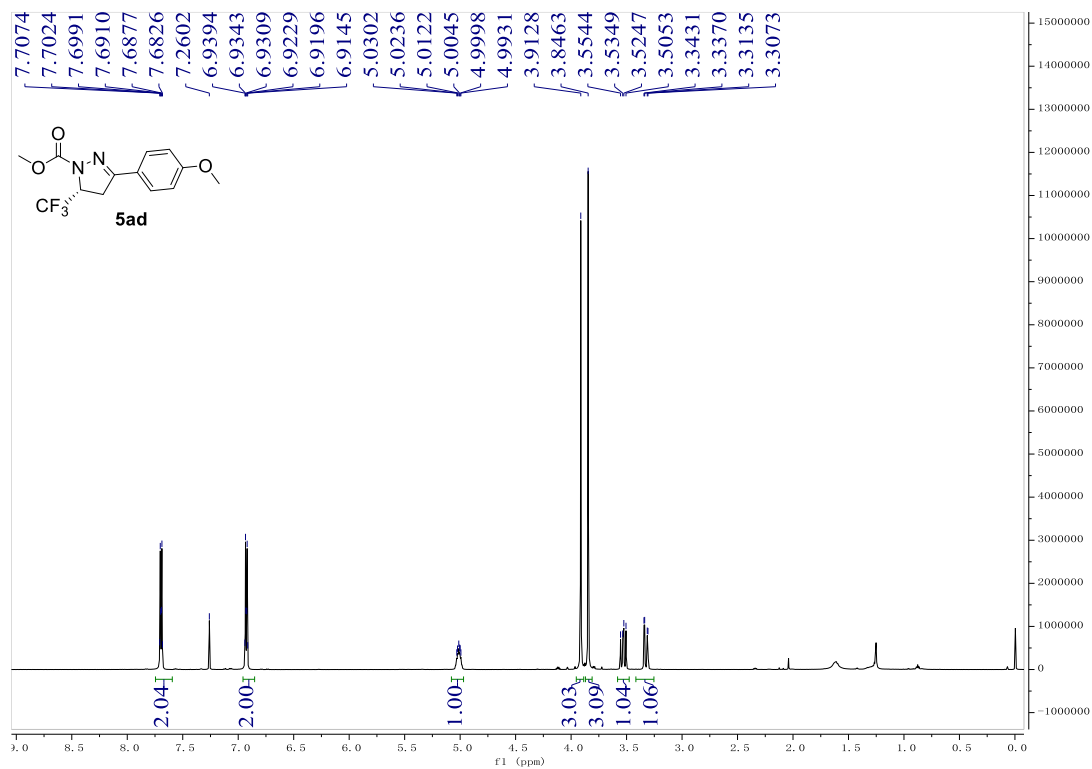

### $^{13}\text{C}\{^1\text{H}\}$ NMR of 5ad (150 MHz, $\text{CDCl}_3$ )

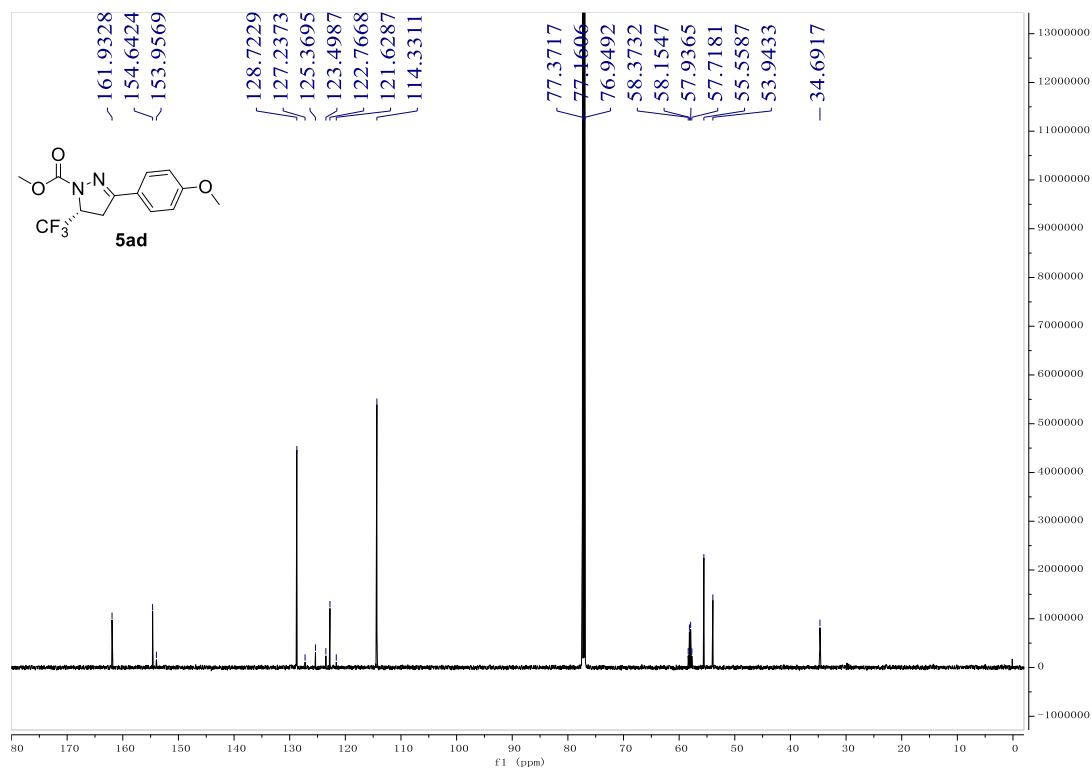

### $^{19}\text{F}\{^1\text{H}\}$ NMR of 5ad (565 MHz, $\text{CDCl}_3$ )

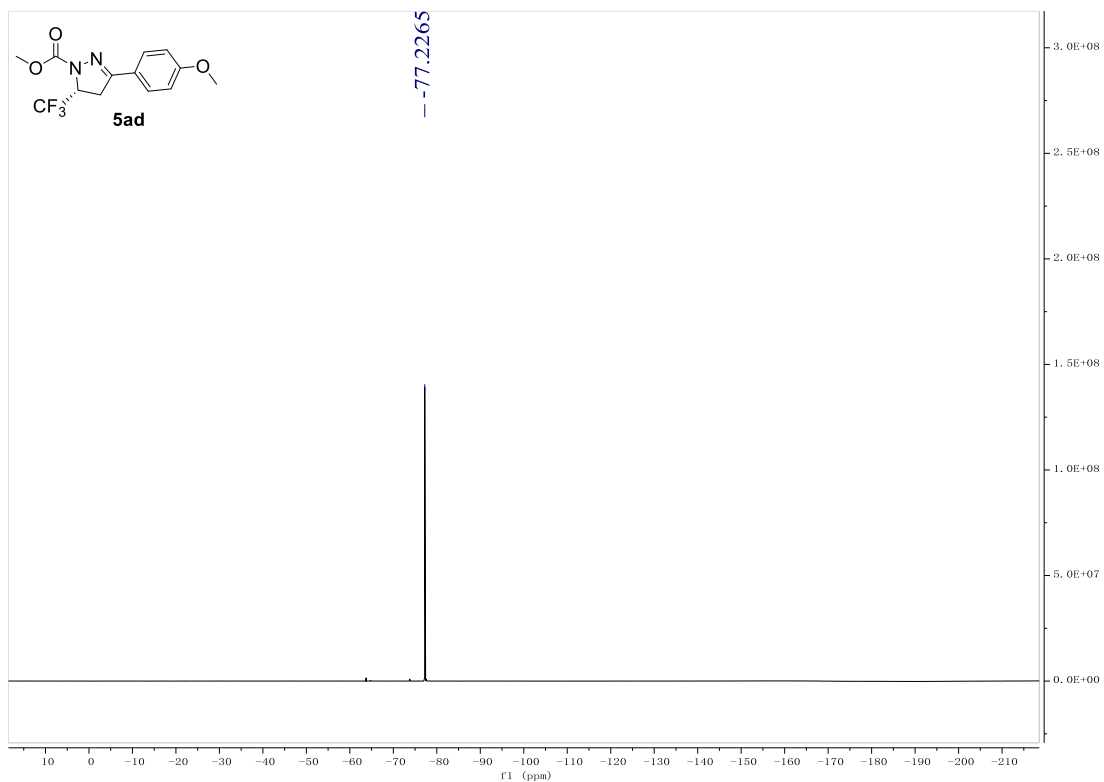

**<sup>1</sup>H NMR of 5ae (600 MHz, CDCl<sub>3</sub>)**

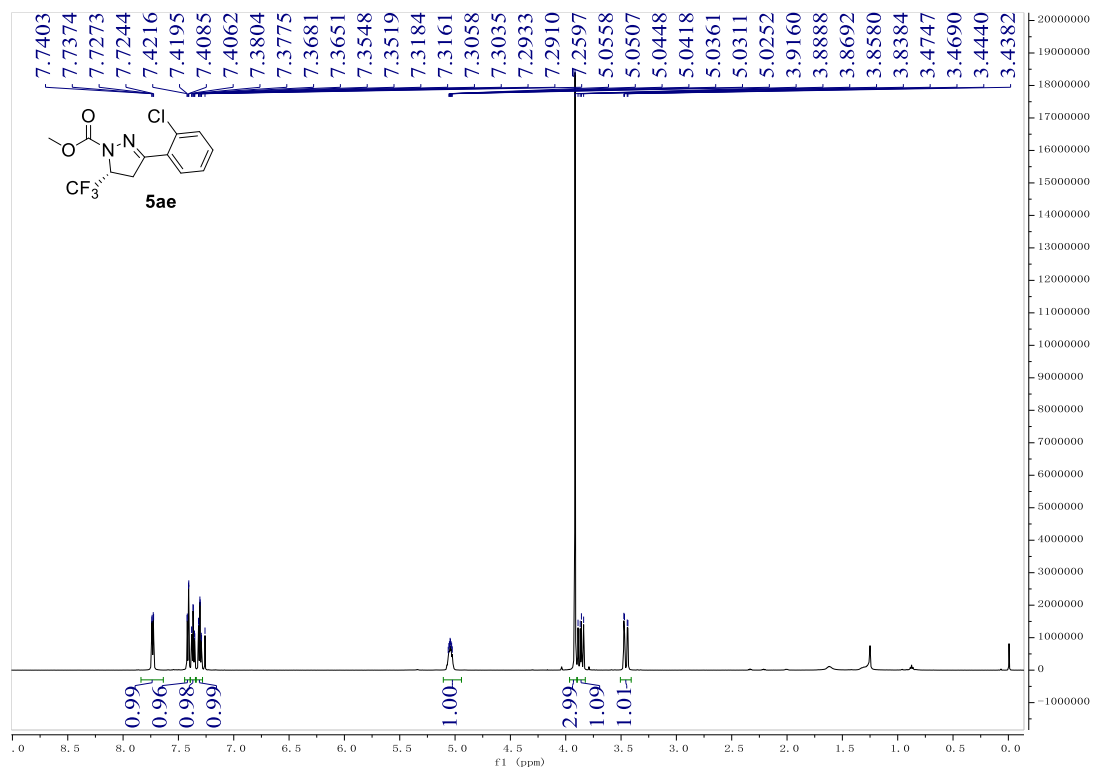

**<sup>13</sup>C{<sup>1</sup>H} NMR of 5ae (150 MHz, CDCl<sub>3</sub>)**

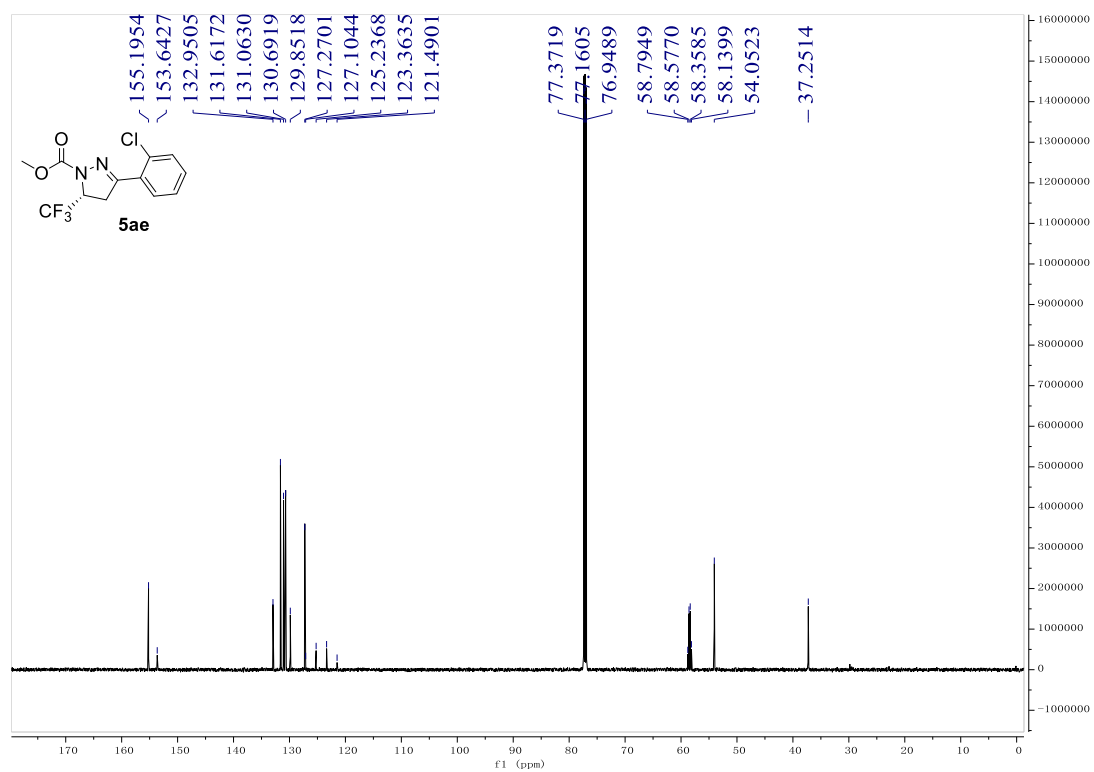

**<sup>19</sup>F{<sup>1</sup>H} NMR of 5ae (565 MHz, CDCl<sub>3</sub>)**

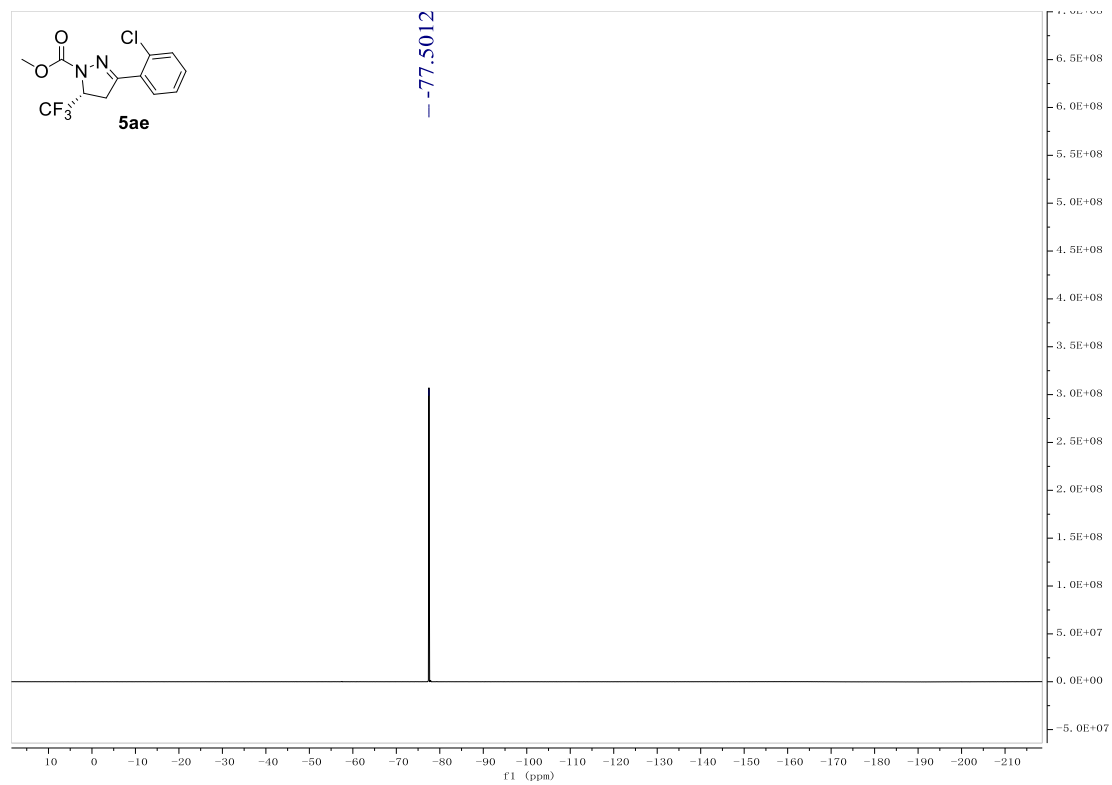

**<sup>1</sup>H NMR of 5af (600 MHz, CDCl<sub>3</sub>)**

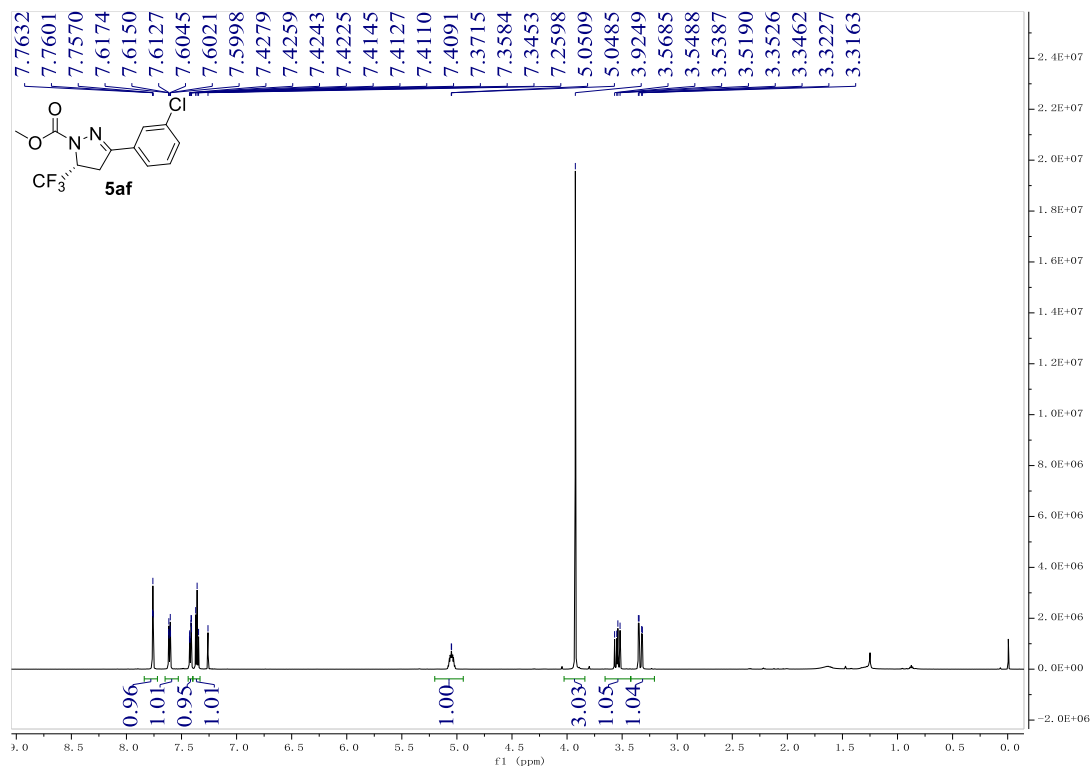

**<sup>13</sup>C{<sup>1</sup>H} NMR of 5af (150 MHz, CDCl<sub>3</sub>)**

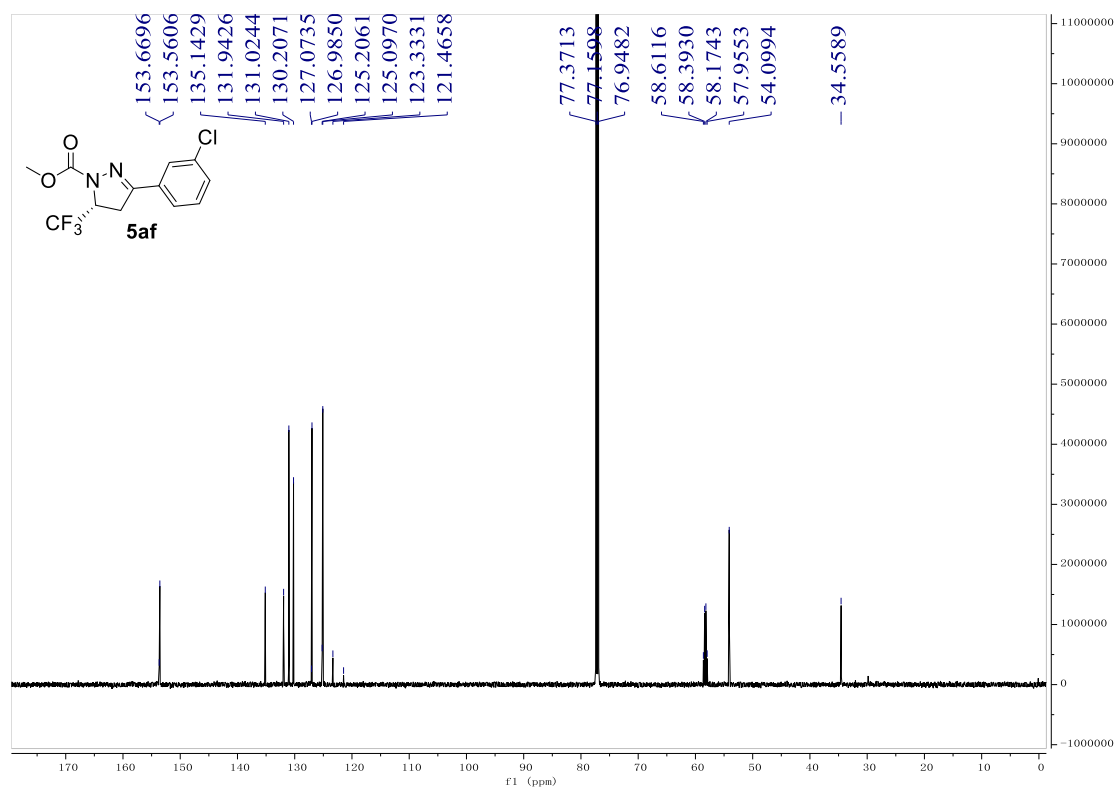

**<sup>19</sup>F{<sup>1</sup>H} NMR of 5af (565 MHz, CDCl<sub>3</sub>)**



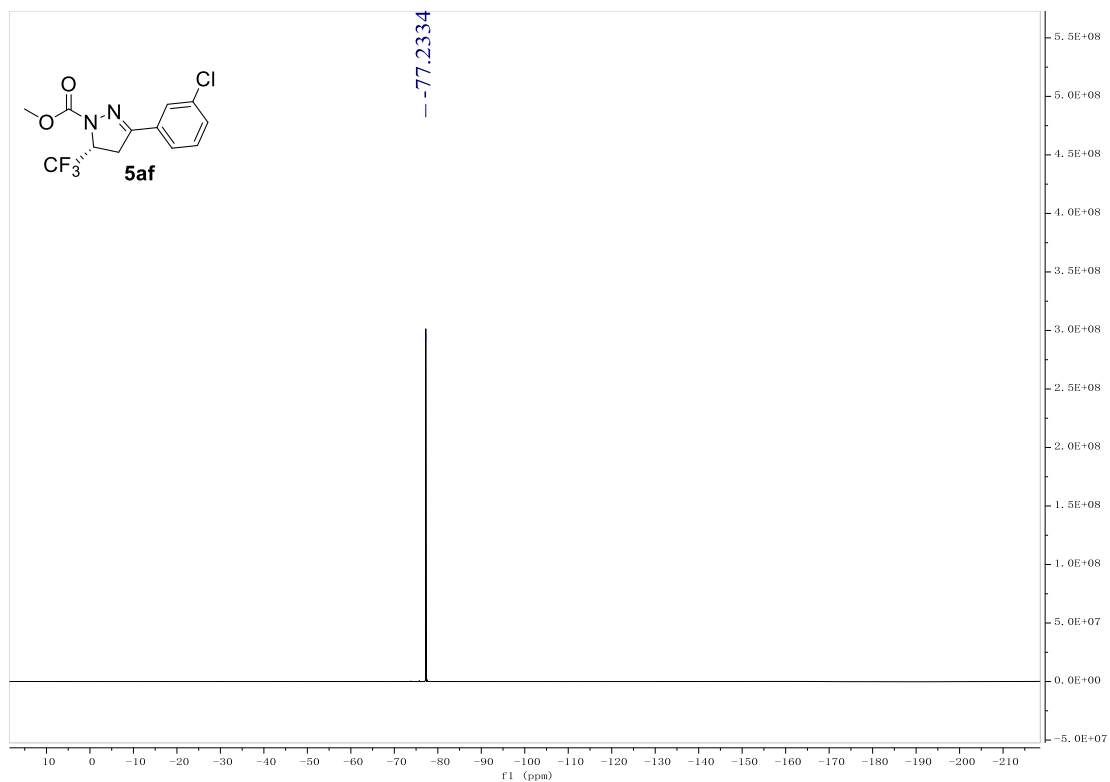

**$^1\text{H}$  NMR of 5ag (600 MHz,  $\text{CDCl}_3$ )**

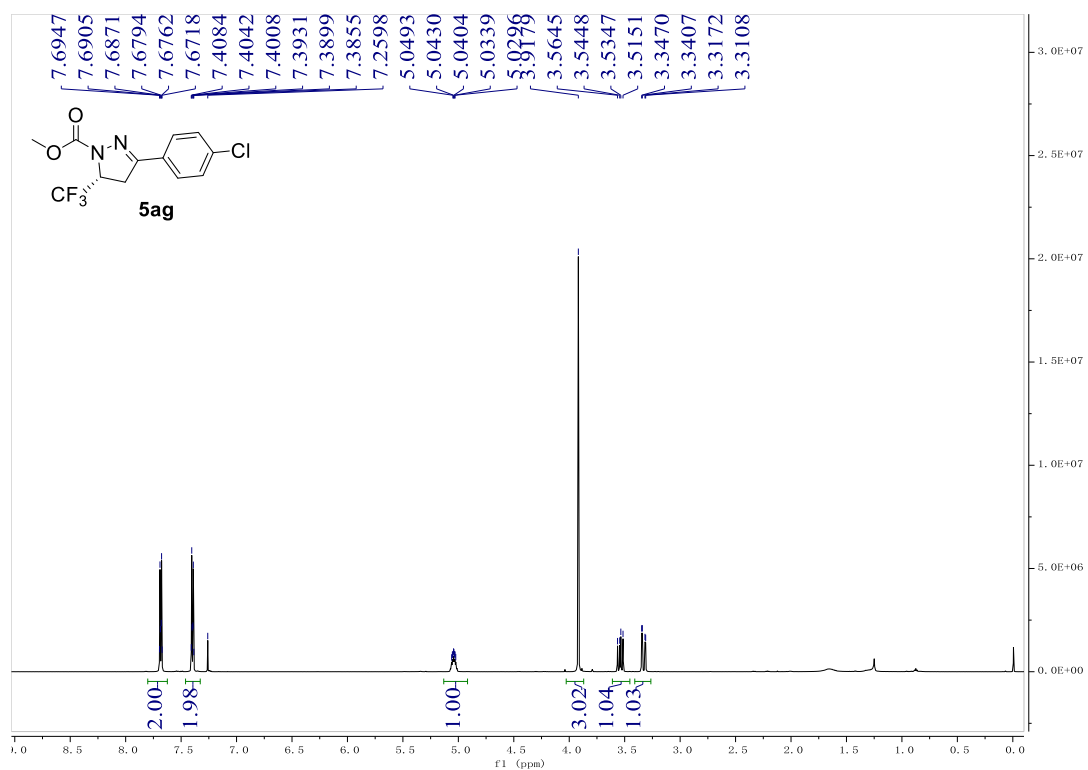

**$^{13}\text{C}\{^1\text{H}\}$  NMR of 5ag (150 MHz,  $\text{CDCl}_3$ )**

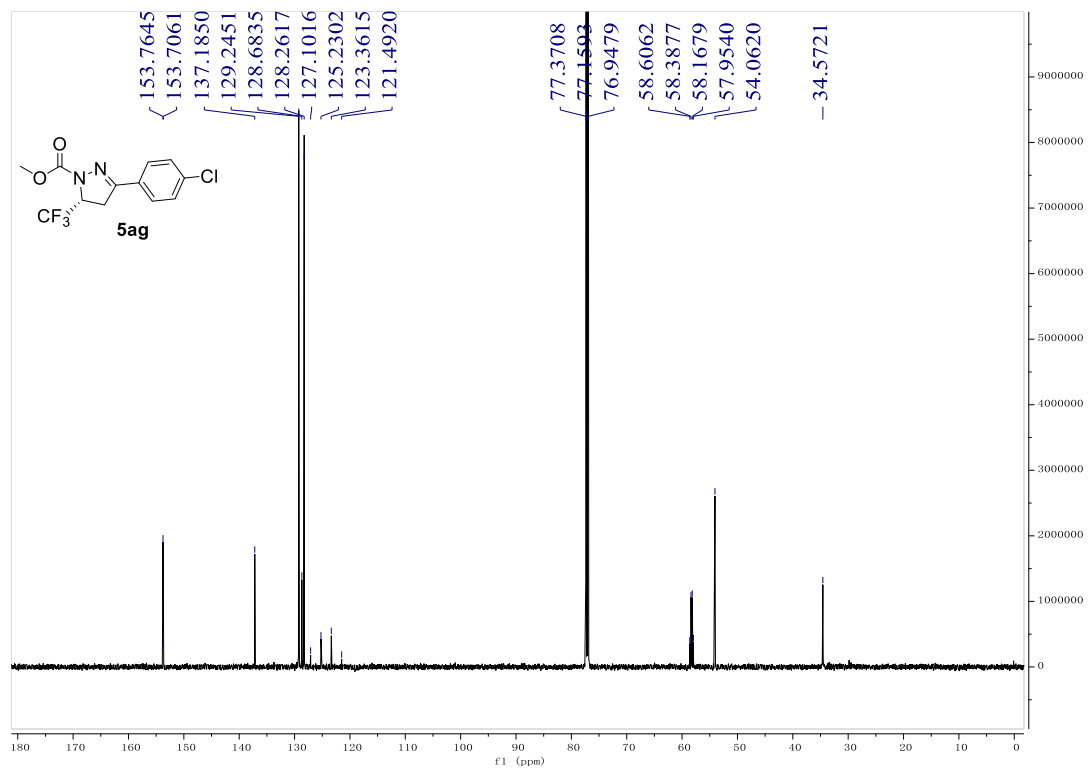

**<sup>19</sup>F{<sup>1</sup>H} NMR of 5ag (565 MHz, CDCl<sub>3</sub>)**

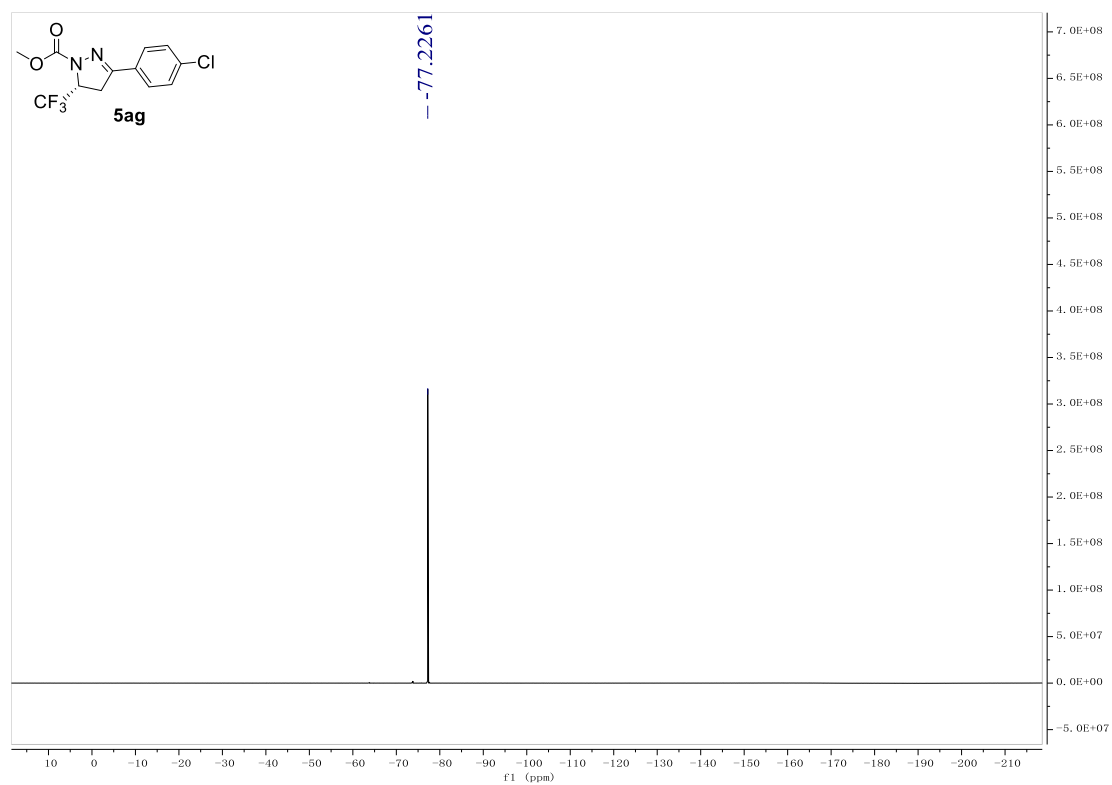

## 11. Copies of HPLC spectra for racemic and chiral adducts

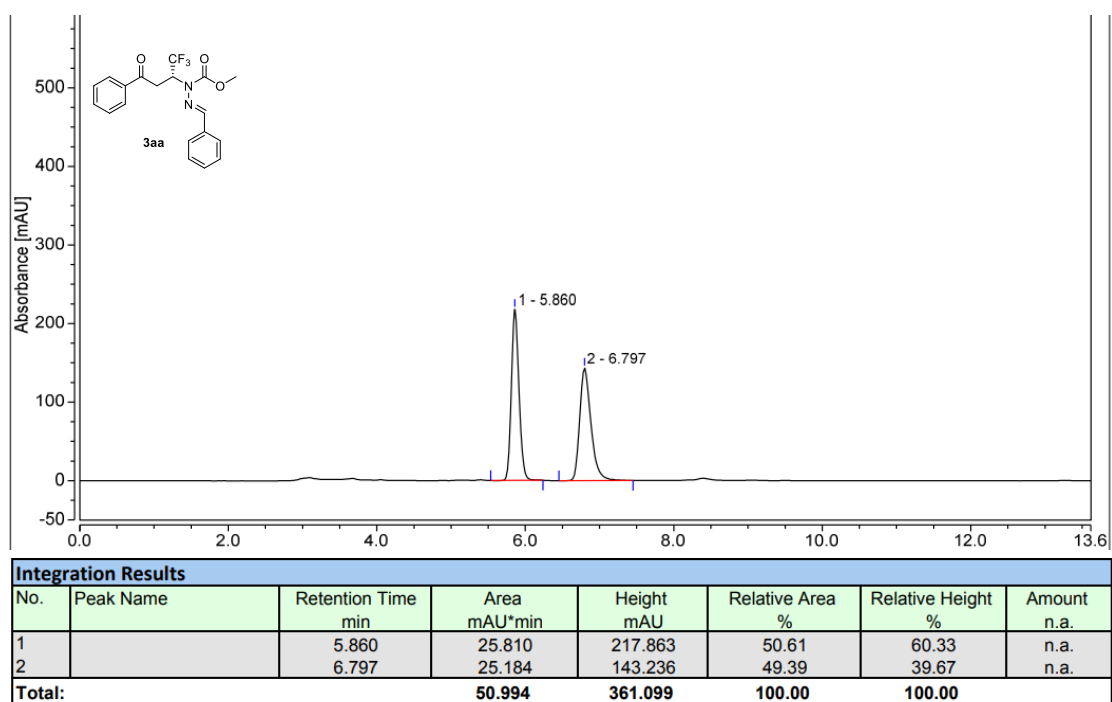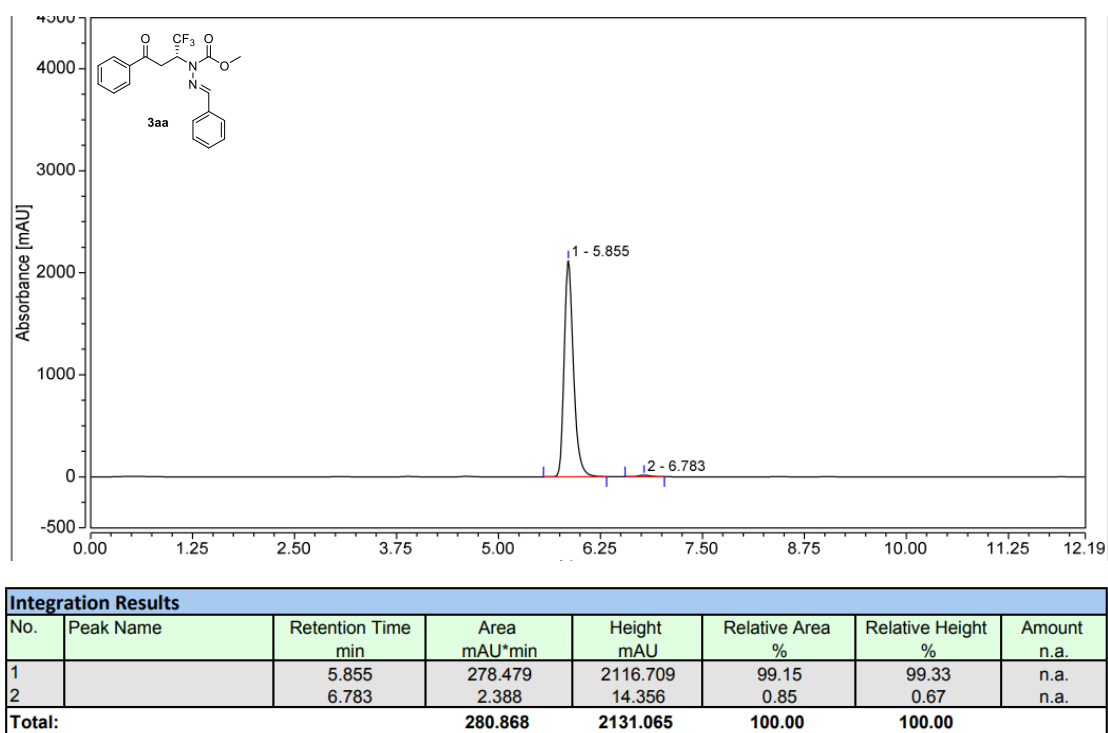

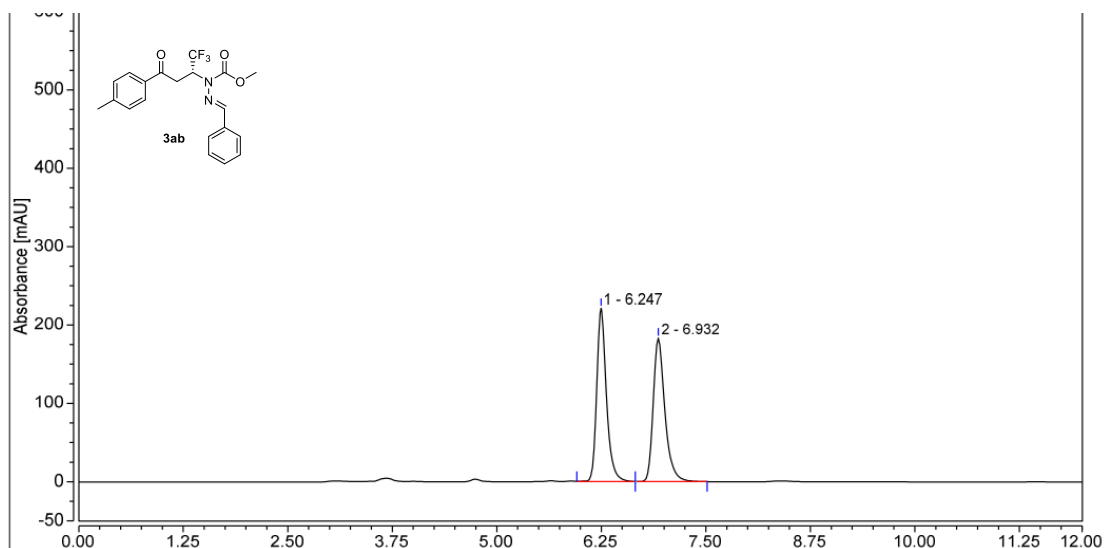

| Integration Results |           |                    |               |                |                 |                   |             |
|---------------------|-----------|--------------------|---------------|----------------|-----------------|-------------------|-------------|
| No.                 | Peak Name | Retention Time min | Area mAU*min  | Height mAU     | Relative Area % | Relative Height % | Amount n.a. |
| 1                   |           | 6.247              | 29.897        | 220.780        | 50.11           | 54.70             | n.a.        |
| 2                   |           | 6.932              | 29.768        | 182.831        | 49.89           | 45.30             | n.a.        |
| <b>Total:</b>       |           |                    | <b>59.665</b> | <b>403.611</b> | <b>100.00</b>   | <b>100.00</b>     |             |

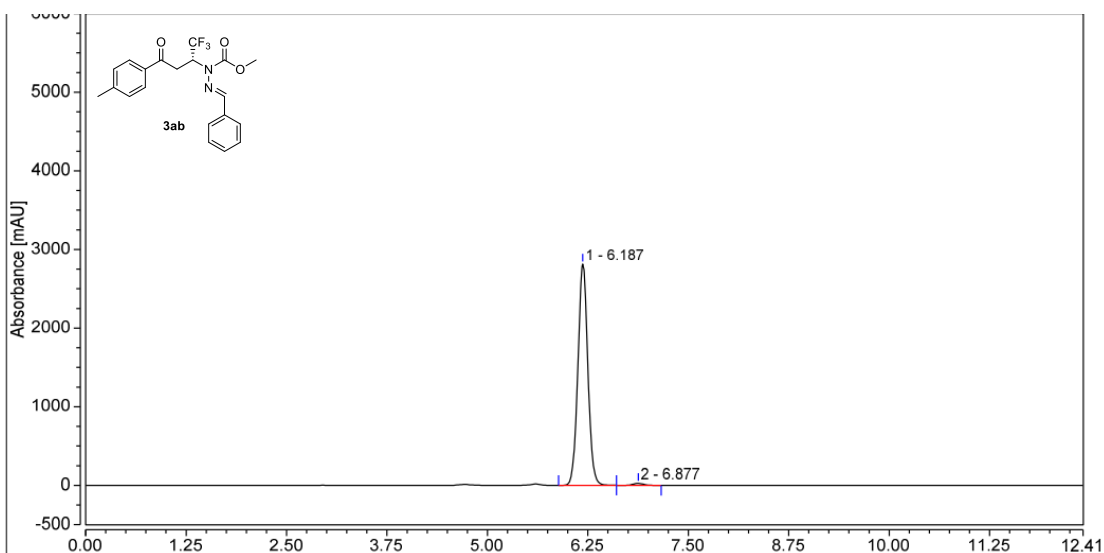

| Integration Results |           |                    |                |                 |                 |                   |             |
|---------------------|-----------|--------------------|----------------|-----------------|-----------------|-------------------|-------------|
| No.                 | Peak Name | Retention Time min | Area mAU*min   | Height mAU      | Relative Area % | Relative Height % | Amount n.a. |
| 1                   |           | 6.187              | 405.859        | 2814.143        | 98.93           | 99.08             | n.a.        |
| 2                   |           | 6.877              | 4.375          | 26.250          | 1.07            | 0.92              | n.a.        |
| <b>Total:</b>       |           |                    | <b>410.234</b> | <b>2840.393</b> | <b>100.00</b>   | <b>100.00</b>     |             |

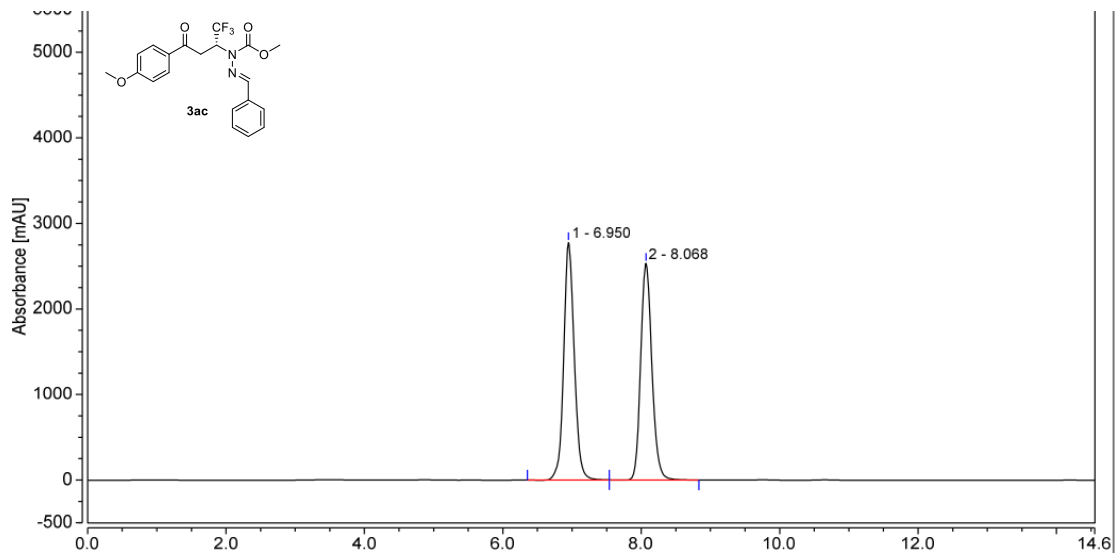

| Integration Results |           |                       |                 |                 |                    |                      |                |
|---------------------|-----------|-----------------------|-----------------|-----------------|--------------------|----------------------|----------------|
| No.                 | Peak Name | Retention Time<br>min | Area<br>mAU*min | Height<br>mAU   | Relative Area<br>% | Relative Height<br>% | Amount<br>n.a. |
| 1                   |           | 6.950                 | 493.182         | 2776.114        | 50.87              | 52.29                | n.a.           |
| 2                   |           | 8.068                 | 476.342         | 2533.274        | 49.13              | 47.71                | n.a.           |
| <b>Total:</b>       |           |                       | <b>969.524</b>  | <b>5309.388</b> | <b>100.00</b>      | <b>100.00</b>        |                |

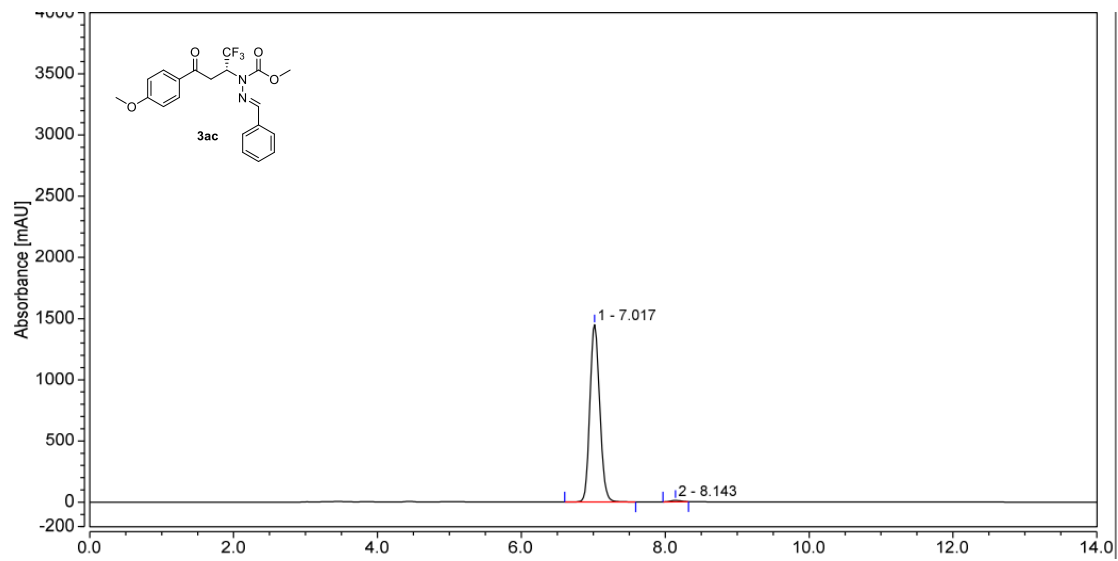

| Integration Results |           |                       |                 |                 |                    |                      |                |
|---------------------|-----------|-----------------------|-----------------|-----------------|--------------------|----------------------|----------------|
| No.                 | Peak Name | Retention Time<br>min | Area<br>mAU*min | Height<br>mAU   | Relative Area<br>% | Relative Height<br>% | Amount<br>n.a. |
| 1                   |           | 7.017                 | 229.346         | 1448.037        | 99.18              | 99.19                | n.a.           |
| 2                   |           | 8.143                 | 1.895           | 11.855          | 0.82               | 0.81                 | n.a.           |
| <b>Total:</b>       |           |                       | <b>231.240</b>  | <b>1459.892</b> | <b>100.00</b>      | <b>100.00</b>        |                |

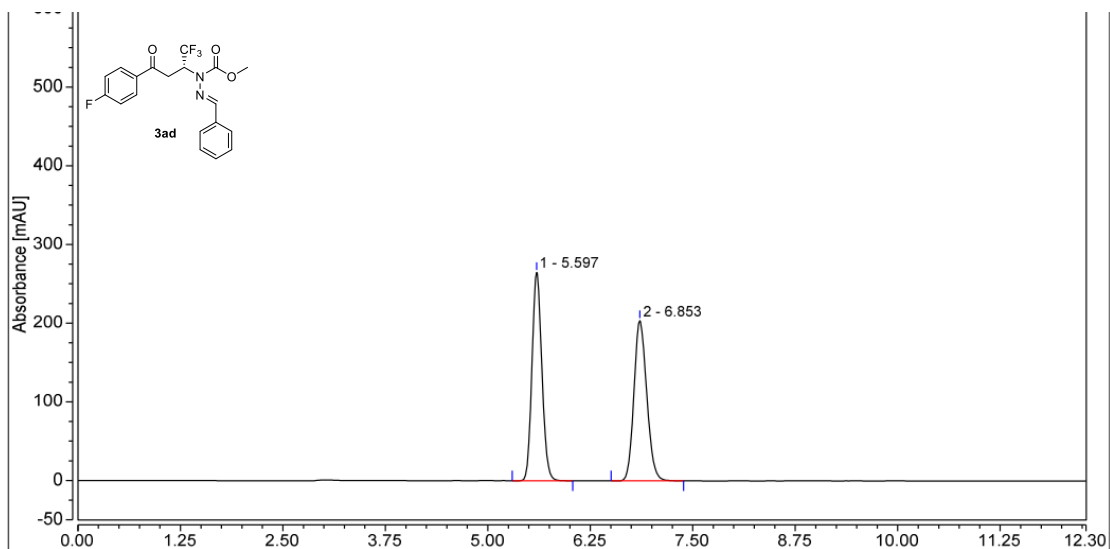

| Integration Results |           |                    |               |                |                 |                   |             |
|---------------------|-----------|--------------------|---------------|----------------|-----------------|-------------------|-------------|
| No.                 | Peak Name | Retention Time min | Area mAU*min  | Height mAU     | Relative Area % | Relative Height % | Amount n.a. |
| 1                   |           | 5.597              | 37.082        | 264.786        | 50.06           | 56.55             | n.a.        |
| 2                   |           | 6.853              | 36.990        | 203.486        | 49.94           | 43.45             | n.a.        |
| <b>Total:</b>       |           |                    | <b>74.072</b> | <b>468.271</b> | <b>100.00</b>   | <b>100.00</b>     |             |

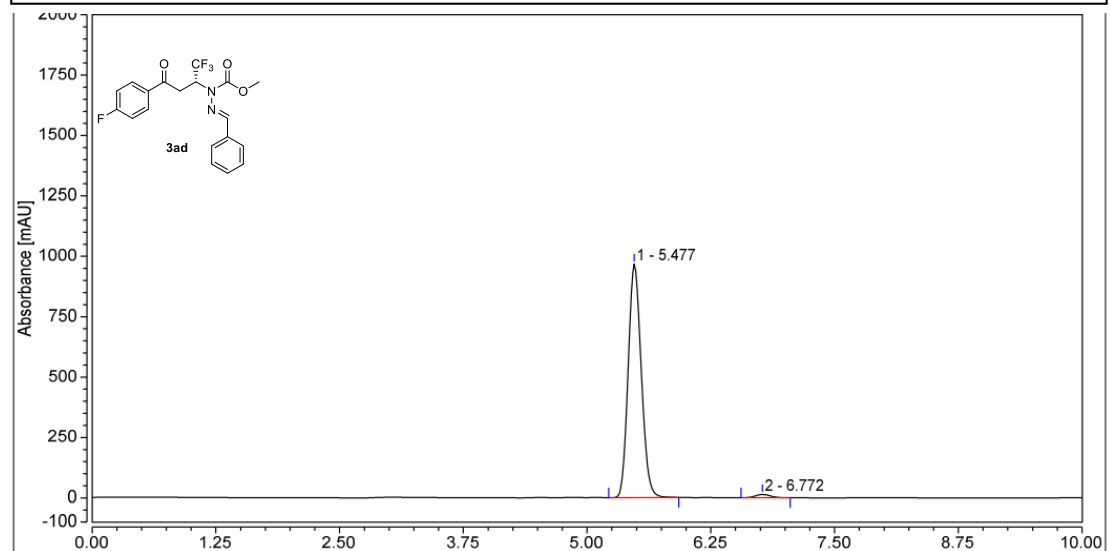

| Integration Results |           |                    |                |                |                 |                   |             |
|---------------------|-----------|--------------------|----------------|----------------|-----------------|-------------------|-------------|
| No.                 | Peak Name | Retention Time min | Area mAU*min   | Height mAU     | Relative Area % | Relative Height % | Amount n.a. |
| 1                   |           | 5.477              | 148.288        | 966.485        | 98.36           | 98.62             | n.a.        |
| 2                   |           | 6.772              | 2.478          | 13.494         | 1.64            | 1.38              | n.a.        |
| <b>Total:</b>       |           |                    | <b>150.766</b> | <b>979.979</b> | <b>100.00</b>   | <b>100.00</b>     |             |

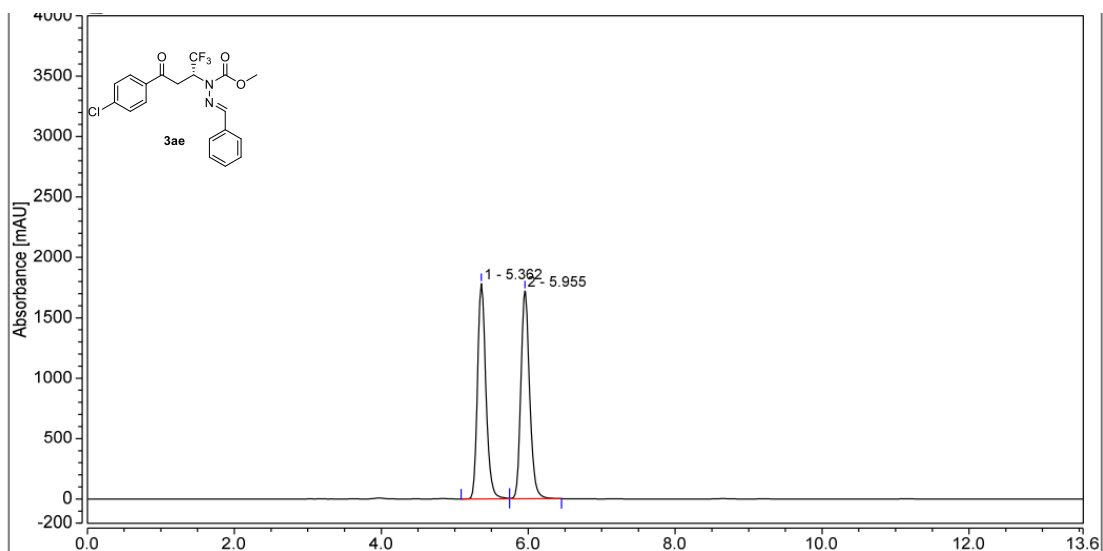

| Integration Results |           |                    |                |                 |                 |                   |             |
|---------------------|-----------|--------------------|----------------|-----------------|-----------------|-------------------|-------------|
| No.                 | Peak Name | Retention Time min | Area mAU*min   | Height mAU      | Relative Area % | Relative Height % | Amount n.a. |
| 1                   |           | 5.362              | 237.192        | 1783.109        | 50.00           | 50.88             | n.a.        |
| 2                   |           | 5.955              | 237.236        | 1721.317        | 50.00           | 49.12             | n.a.        |
| <b>Total:</b>       |           |                    | <b>474.427</b> | <b>3504.425</b> | <b>100.00</b>   | <b>100.00</b>     |             |

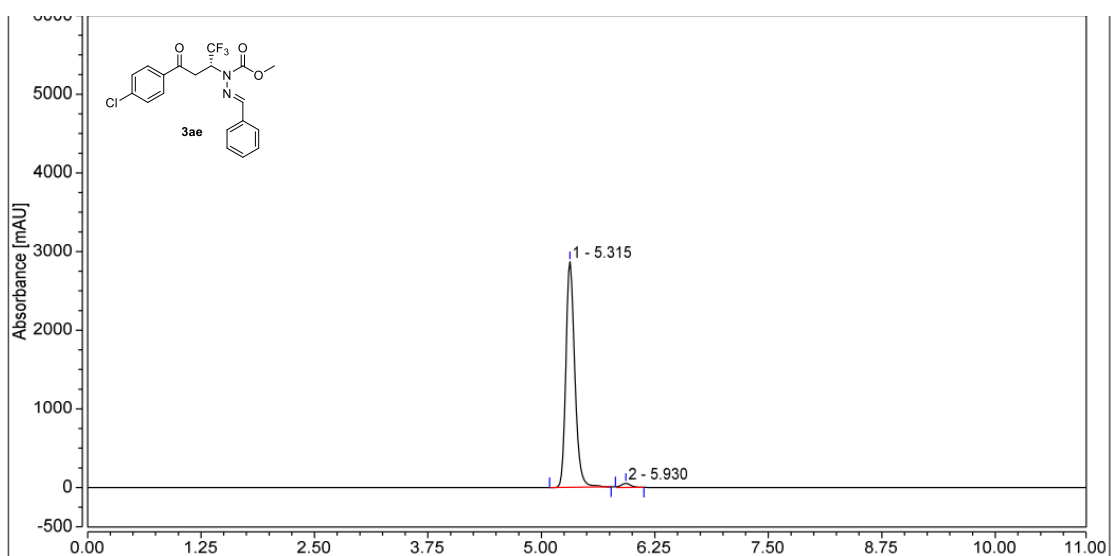

| Integration Results |           |                    |                |                 |                 |                   |             |
|---------------------|-----------|--------------------|----------------|-----------------|-----------------|-------------------|-------------|
| No.                 | Peak Name | Retention Time min | Area mAU*min   | Height mAU      | Relative Area % | Relative Height % | Amount n.a. |
| 1                   |           | 5.315              | 329.253        | 2867.530        | 98.08           | 98.26             | n.a.        |
| 2                   |           | 5.930              | 6.434          | 50.635          | 1.92            | 1.74              | n.a.        |
| <b>Total:</b>       |           |                    | <b>335.686</b> | <b>2918.164</b> | <b>100.00</b>   | <b>100.00</b>     |             |

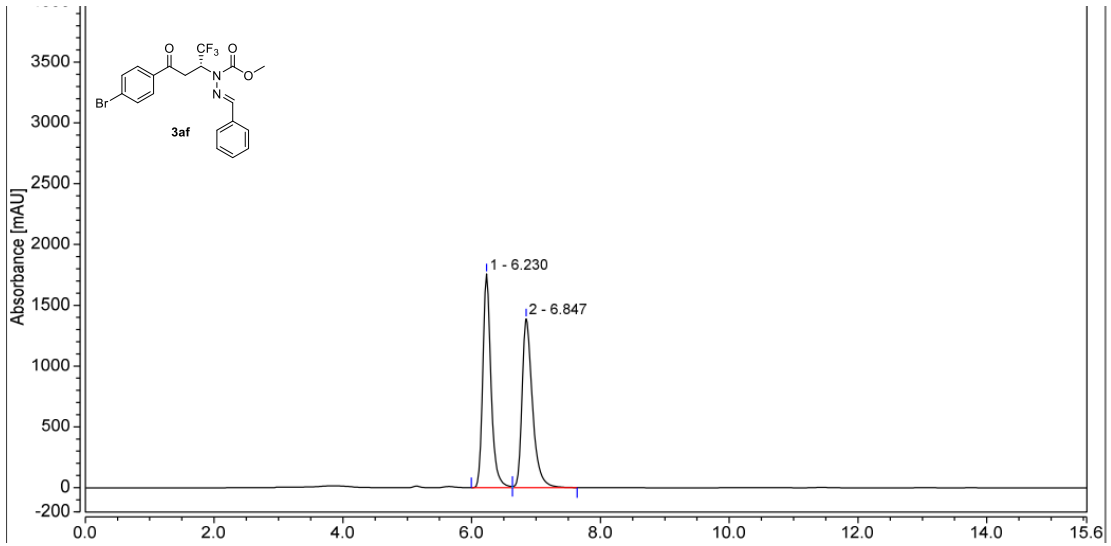

| Integration Results |           |                    |                |                 |                 |                   |        |
|---------------------|-----------|--------------------|----------------|-----------------|-----------------|-------------------|--------|
| No.                 | Peak Name | Retention Time min | Area mAU*min   | Height mAU      | Relative Area % | Relative Height % | Amount |
| 1                   |           | 6.230              | 258.368        | 1759.377        | 49.89           | 55.89             | n.a.   |
| 2                   |           | 6.847              | 259.460        | 1388.346        | 50.11           | 44.11             | n.a.   |
| <b>Total:</b>       |           |                    | <b>517.828</b> | <b>3147.723</b> | <b>100.00</b>   | <b>100.00</b>     |        |

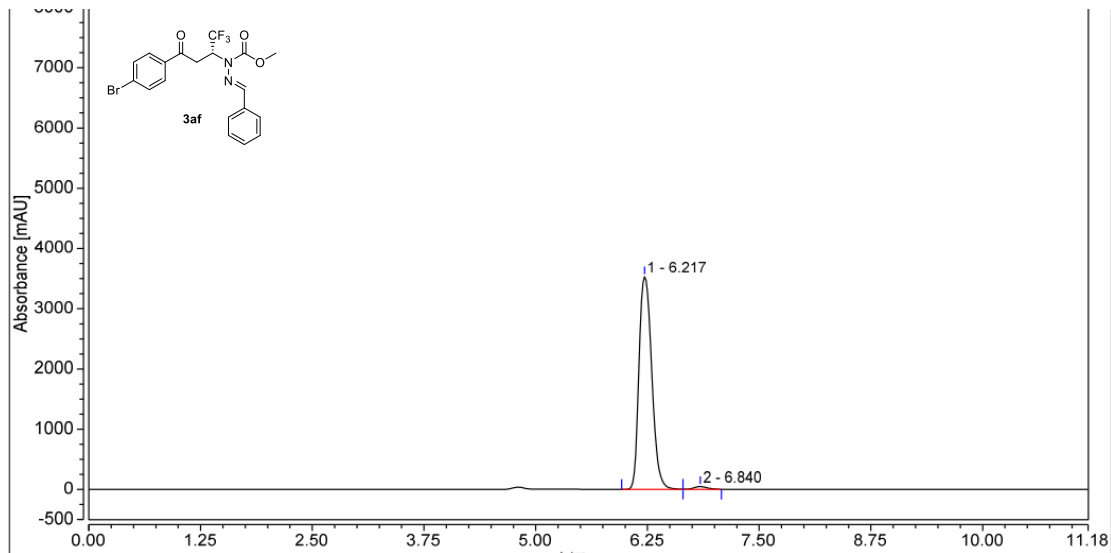

| Integration Results |           |                    |                |                 |                 |                   |        |
|---------------------|-----------|--------------------|----------------|-----------------|-----------------|-------------------|--------|
| No.                 | Peak Name | Retention Time min | Area mAU*min   | Height mAU      | Relative Area % | Relative Height % | Amount |
| 1                   |           | 6.217              | 583.192        | 3527.505        | 98.64           | 98.71             | n.a.   |
| 2                   |           | 6.840              | 8.031          | 46.247          | 1.36            | 1.29              | n.a.   |
| <b>Total:</b>       |           |                    | <b>591.223</b> | <b>3573.752</b> | <b>100.00</b>   | <b>100.00</b>     |        |



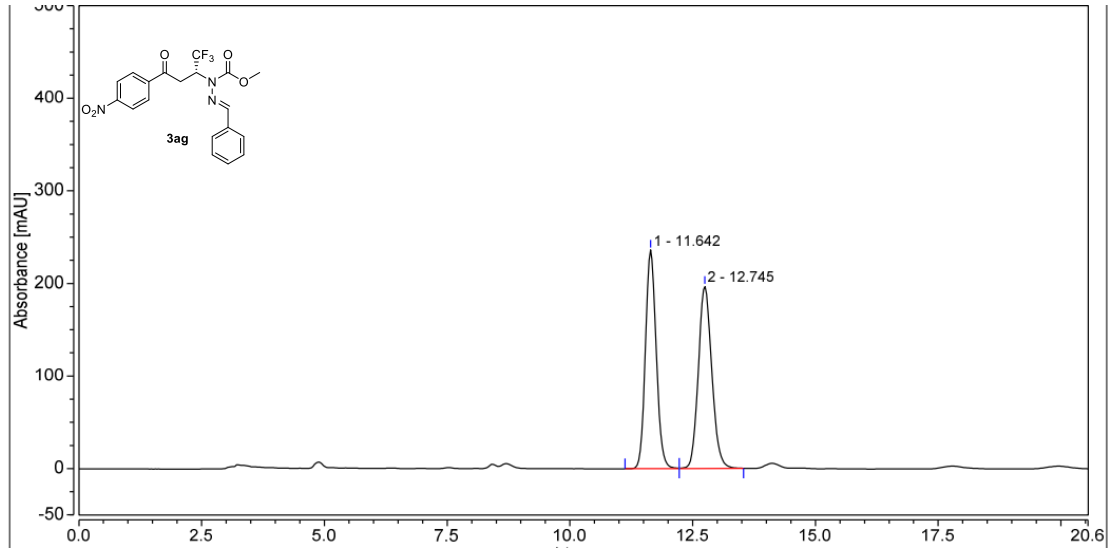

| Integration Results |           |                       |                 |                |                    |                      |                |
|---------------------|-----------|-----------------------|-----------------|----------------|--------------------|----------------------|----------------|
| No.                 | Peak Name | Retention Time<br>min | Area<br>mAU*min | Height<br>mAU  | Relative Area<br>% | Relative Height<br>% | Amount<br>n.a. |
| 1                   |           | 11.642                | 60.413          | 236.186        | 49.15              | 54.55                | n.a.           |
| 2                   |           | 12.745                | 62.498          | 196.747        | 50.85              | 45.45                | n.a.           |
| <b>Total:</b>       |           |                       | <b>122.910</b>  | <b>432.933</b> | <b>100.00</b>      | <b>100.00</b>        |                |

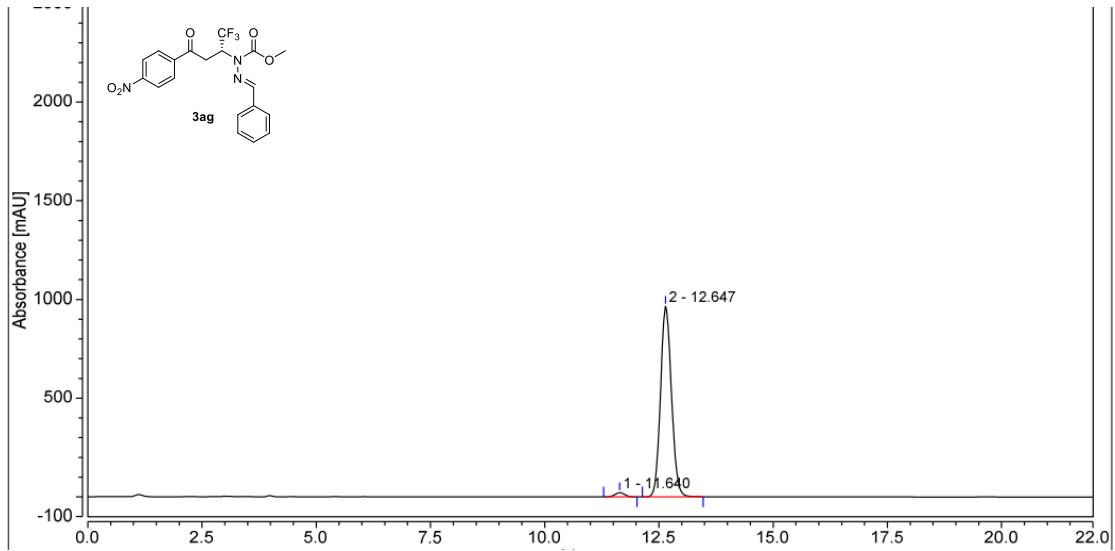

| Integration Results |           |                       |                 |                |                    |                      |                |
|---------------------|-----------|-----------------------|-----------------|----------------|--------------------|----------------------|----------------|
| No.                 | Peak Name | Retention Time<br>min | Area<br>mAU*min | Height<br>mAU  | Relative Area<br>% | Relative Height<br>% | Amount<br>n.a. |
| 1                   |           | 11.640                | 5.151           | 21.024         | 1.88               | 2.13                 | n.a.           |
| 2                   |           | 12.647                | 268.837         | 965.289        | 98.12              | 97.87                | n.a.           |
| <b>Total:</b>       |           |                       | <b>273.988</b>  | <b>986.313</b> | <b>100.00</b>      | <b>100.00</b>        |                |

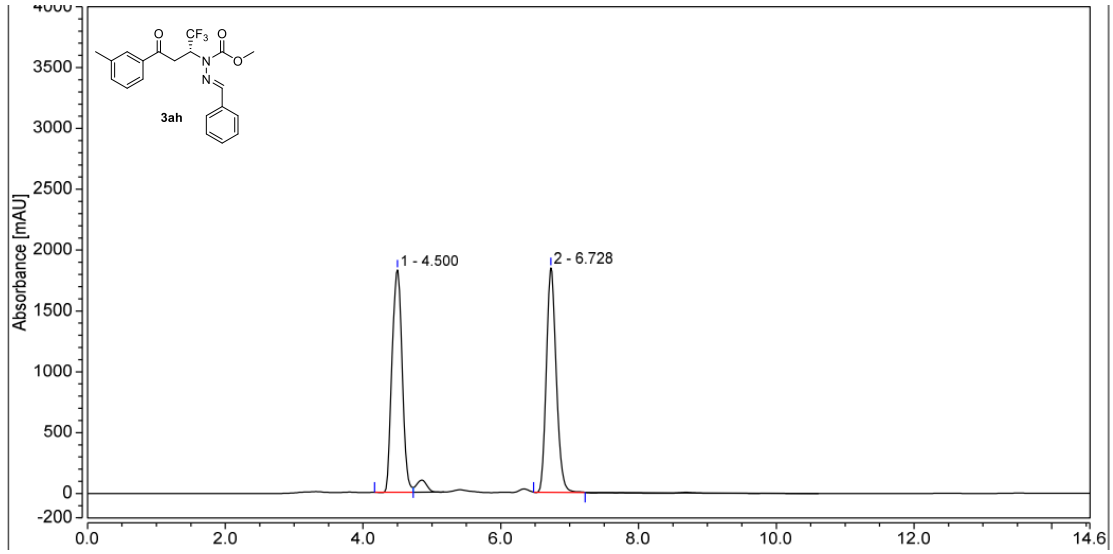

| Integration Results |           |                       |                 |                 |                    |                      |        |
|---------------------|-----------|-----------------------|-----------------|-----------------|--------------------|----------------------|--------|
| No.                 | Peak Name | Retention Time<br>min | Area<br>mAU*min | Height<br>mAU   | Relative Area<br>% | Relative Height<br>% | Amount |
| 1                   |           | 4.500                 | 312.557         | 1826.391        | 50.43              | 49.75                | n.a.   |
| 2                   |           | 6.728                 | 307.250         | 1844.409        | 49.57              | 50.25                | n.a.   |
| <b>Total:</b>       |           |                       | <b>619.807</b>  | <b>3670.800</b> | <b>100.00</b>      | <b>100.00</b>        |        |

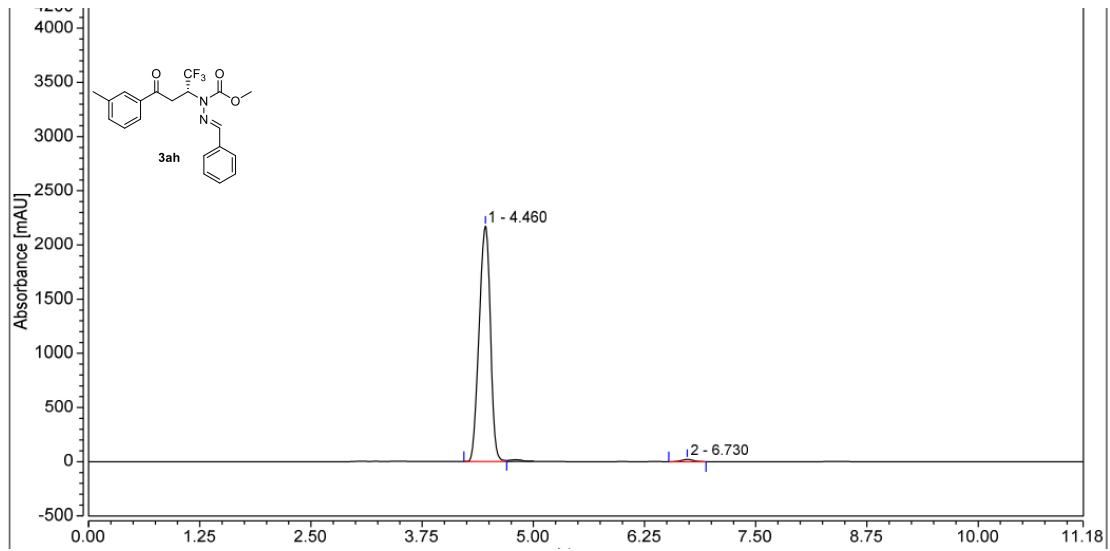

| Integration Results |           |                       |                 |                 |                    |                      |        |
|---------------------|-----------|-----------------------|-----------------|-----------------|--------------------|----------------------|--------|
| No.                 | Peak Name | Retention Time<br>min | Area<br>mAU*min | Height<br>mAU   | Relative Area<br>% | Relative Height<br>% | Amount |
| 1                   |           | 4.460                 | 318.720         | 2171.171        | 99.05              | 99.03                | n.a.   |
| 2                   |           | 6.730                 | 3.055           | 21.314          | 0.95               | 0.97                 | n.a.   |
| <b>Total:</b>       |           |                       | <b>321.775</b>  | <b>2192.485</b> | <b>100.00</b>      | <b>100.00</b>        |        |

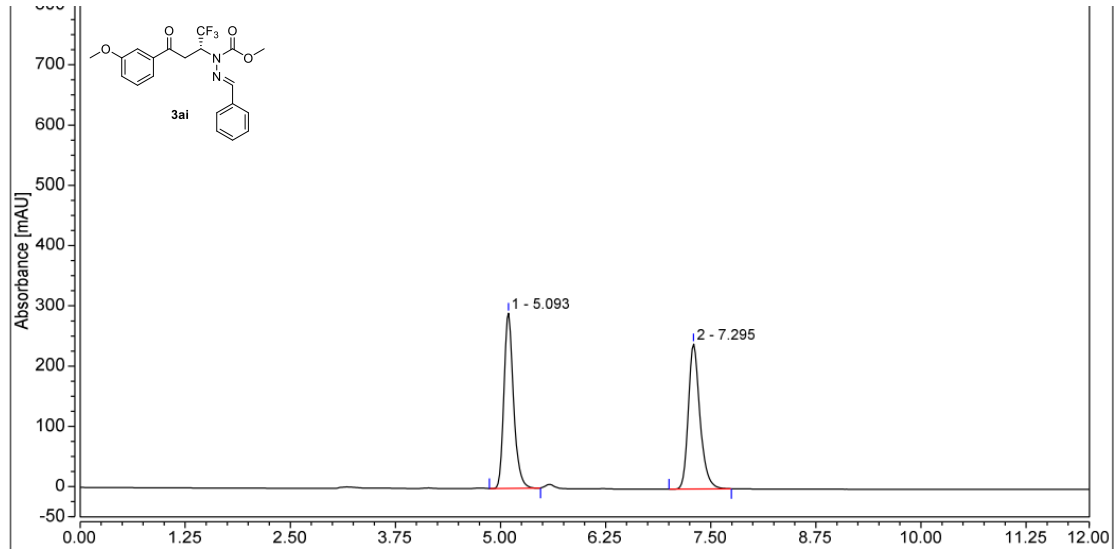

| Integration Results |           |                       |                 |                |                    |                      |                |
|---------------------|-----------|-----------------------|-----------------|----------------|--------------------|----------------------|----------------|
| No.                 | Peak Name | Retention Time<br>min | Area<br>mAU*min | Height<br>mAU  | Relative Area<br>% | Relative Height<br>% | Amount<br>n.a. |
| 1                   |           | 5.093                 | 38.631          | 291.008        | 49.93              | 54.71                | n.a.           |
| 2                   |           | 7.295                 | 38.741          | 240.866        | 50.07              | 45.29                | n.a.           |
| <b>Total:</b>       |           |                       | <b>77.372</b>   | <b>531.873</b> | <b>100.00</b>      | <b>100.00</b>        |                |

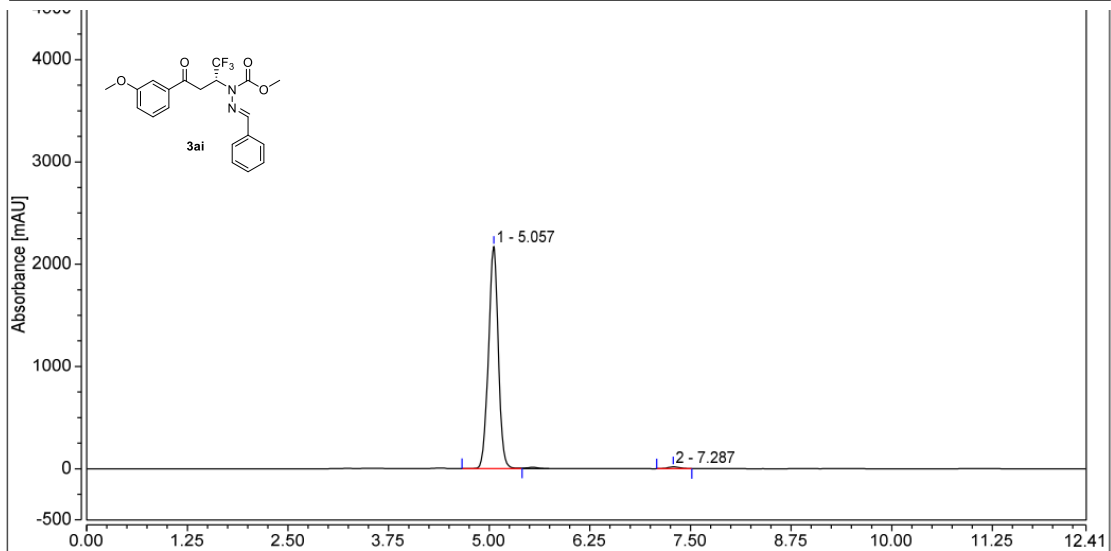

| Integration Results |           |                       |                 |                 |                    |                      |                |
|---------------------|-----------|-----------------------|-----------------|-----------------|--------------------|----------------------|----------------|
| No.                 | Peak Name | Retention Time<br>min | Area<br>mAU*min | Height<br>mAU   | Relative Area<br>% | Relative Height<br>% | Amount<br>n.a. |
| 1                   |           | 5.057                 | 304.916         | 2173.489        | 99.03              | 99.15                | n.a.           |
| 2                   |           | 7.287                 | 2.997           | 18.713          | 0.97               | 0.85                 | n.a.           |
| <b>Total:</b>       |           |                       | <b>307.913</b>  | <b>2192.202</b> | <b>100.00</b>      | <b>100.00</b>        |                |

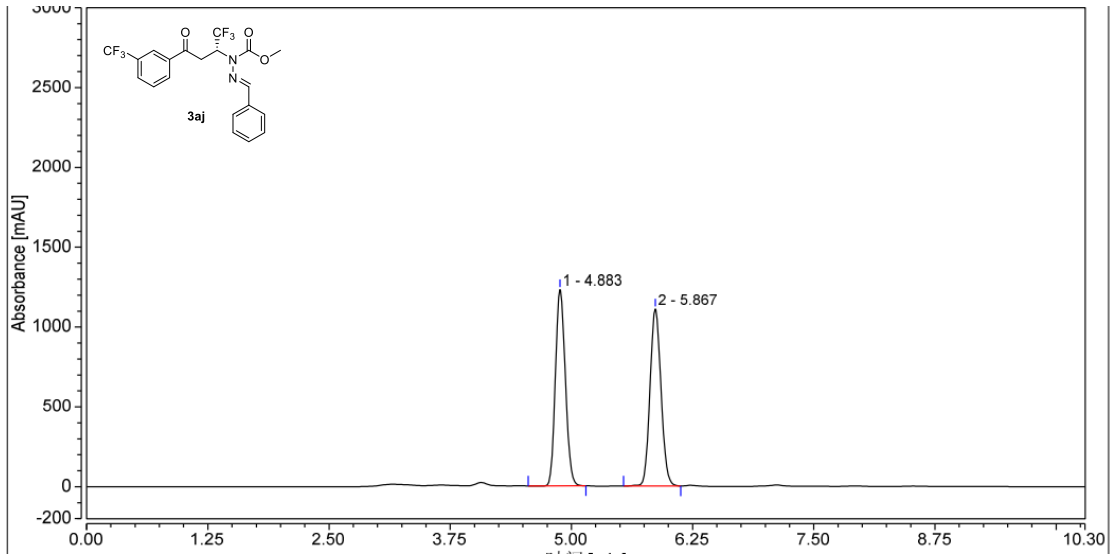

| Integration Results |           |                    |                |                 |                 |                   |        |
|---------------------|-----------|--------------------|----------------|-----------------|-----------------|-------------------|--------|
| No.                 | Peak Name | Retention Time min | Area mAU*min   | Height mAU      | Relative Area % | Relative Height % | Amount |
| 1                   |           | 4.883              | 145.607        | 1228.608        | 50.03           | 52.57             | n.a.   |
| 2                   |           | 5.867              | 145.416        | 1108.465        | 49.97           | 47.43             | n.a.   |
| <b>Total:</b>       |           |                    | <b>291.024</b> | <b>2337.073</b> | <b>100.00</b>   | <b>100.00</b>     |        |

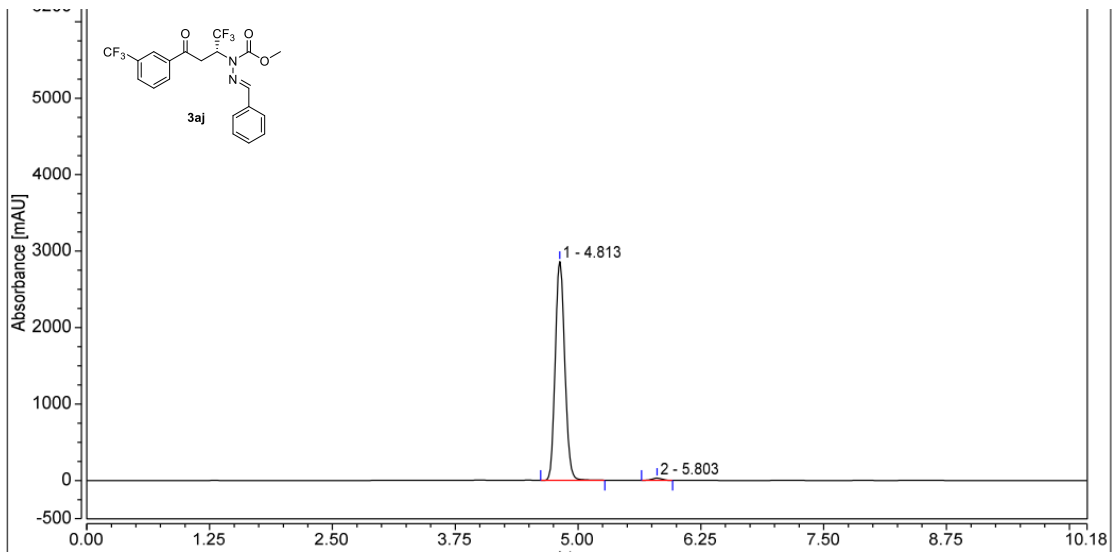

| Integration Results |           |                    |                |                 |                 |                   |        |
|---------------------|-----------|--------------------|----------------|-----------------|-----------------|-------------------|--------|
| No.                 | Peak Name | Retention Time min | Area mAU*min   | Height mAU      | Relative Area % | Relative Height % | Amount |
| 1                   |           | 4.813              | 321.251        | 2862.039        | 98.89           | 98.98             | n.a.   |
| 2                   |           | 5.803              | 3.619          | 29.452          | 1.11            | 1.02              | n.a.   |
| <b>Total:</b>       |           |                    | <b>324.869</b> | <b>2891.491</b> | <b>100.00</b>   | <b>100.00</b>     |        |

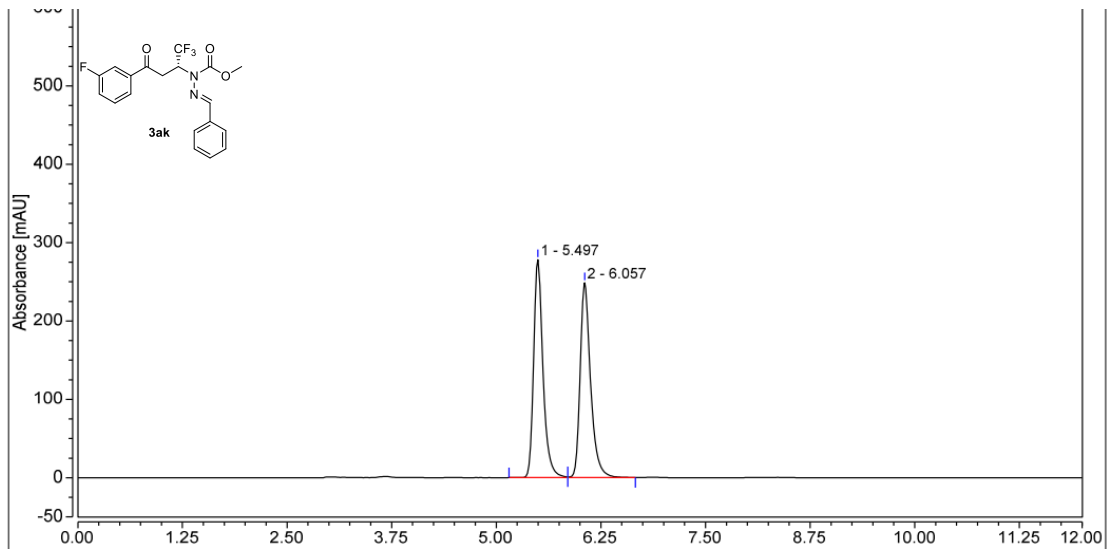

| Integration Results |           |                    |               |                |                 |                   |        |
|---------------------|-----------|--------------------|---------------|----------------|-----------------|-------------------|--------|
| No.                 | Peak Name | Retention Time min | Area mAU*min  | Height mAU     | Relative Area % | Relative Height % | Amount |
| 1                   |           | 5.497              | 35.692        | 277.988        | 49.83           | 52.78             | n.a.   |
| 2                   |           | 6.057              | 35.929        | 248.714        | 50.17           | 47.22             | n.a.   |
| <b>Total:</b>       |           |                    | <b>71.621</b> | <b>526.701</b> | <b>100.00</b>   | <b>100.00</b>     |        |

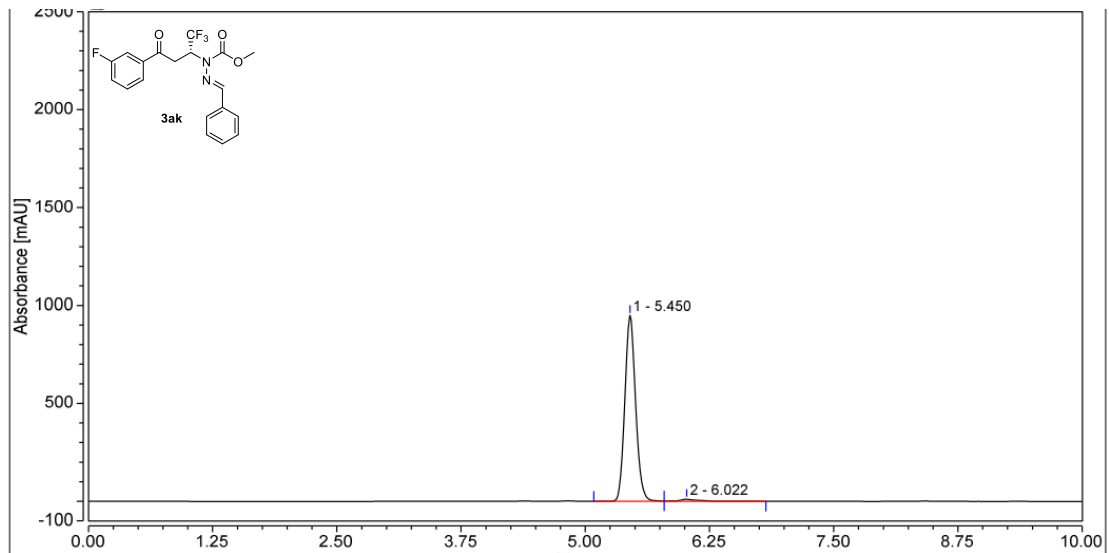

| Integration Results |           |                    |                |                |                 |                   |        |
|---------------------|-----------|--------------------|----------------|----------------|-----------------|-------------------|--------|
| No.                 | Peak Name | Retention Time min | Area mAU*min   | Height mAU     | Relative Area % | Relative Height % | Amount |
| 1                   |           | 5.450              | 119.503        | 948.851        | 98.18           | 98.86             | n.a.   |
| 2                   |           | 6.022              | 2.210          | 10.963         | 1.82            | 1.14              | n.a.   |
| <b>Total:</b>       |           |                    | <b>121.713</b> | <b>959.814</b> | <b>100.00</b>   | <b>100.00</b>     |        |

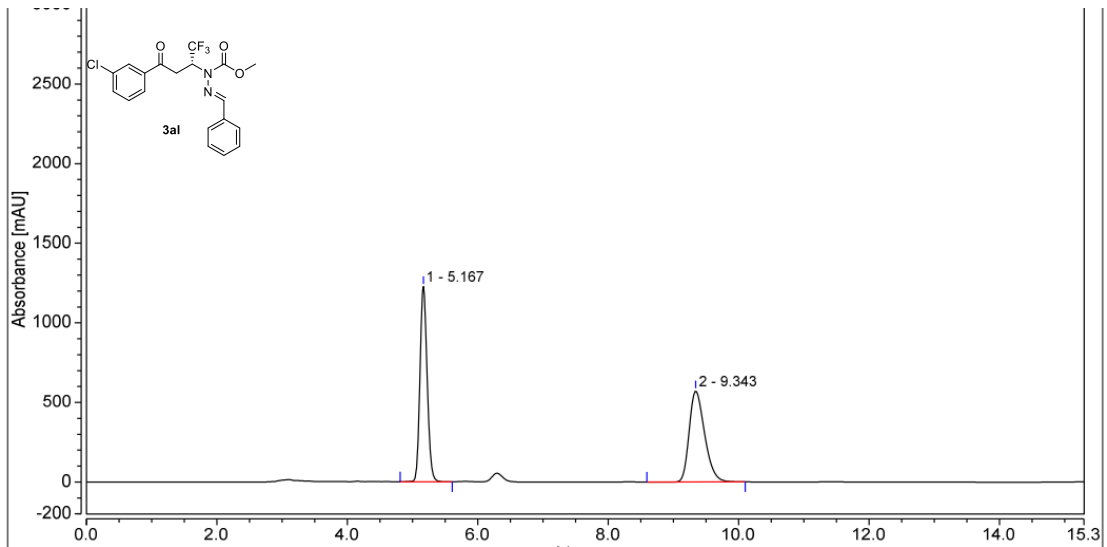

| Integration Results |           |                    |                |                 |                 |                   |             |
|---------------------|-----------|--------------------|----------------|-----------------|-----------------|-------------------|-------------|
| No.                 | Peak Name | Retention Time min | Area mAU*min   | Height mAU      | Relative Area % | Relative Height % | Amount n.a. |
| 1                   |           | 5.167              | 156.123        | 1226.987        | 49.83           | 68.19             | n.a.        |
| 2                   |           | 9.343              | 157.189        | 572.502         | 50.17           | 31.81             | n.a.        |
| <b>Total:</b>       |           |                    | <b>313.312</b> | <b>1799.489</b> | <b>100.00</b>   | <b>100.00</b>     |             |

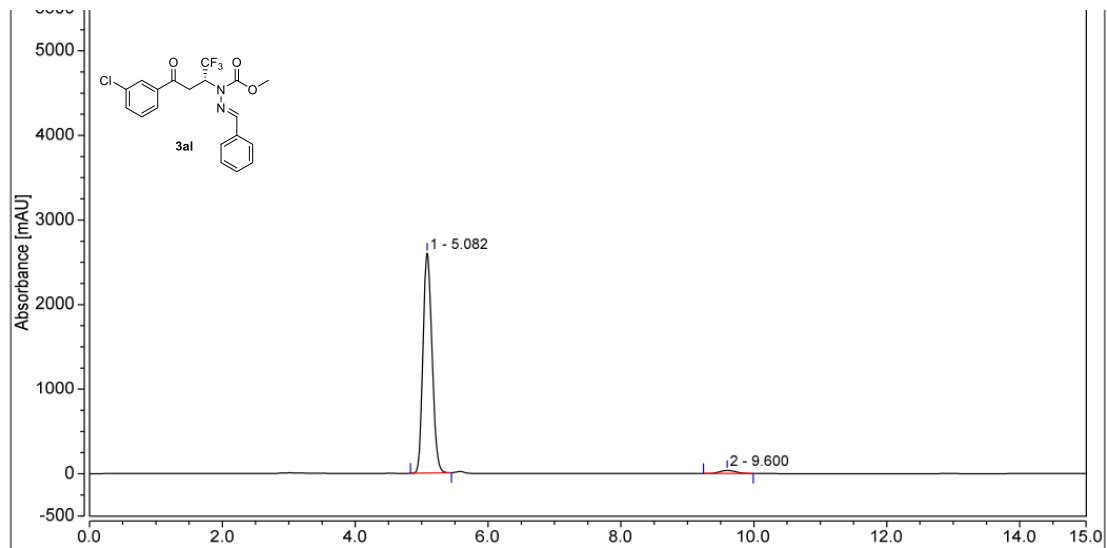

| Integration Results |           |                    |                |                 |                 |                   |             |
|---------------------|-----------|--------------------|----------------|-----------------|-----------------|-------------------|-------------|
| No.                 | Peak Name | Retention Time min | Area mAU*min   | Height mAU      | Relative Area % | Relative Height % | Amount n.a. |
| 1                   |           | 5.082              | 411.680        | 2599.764        | 97.52           | 98.60             | n.a.        |
| 2                   |           | 9.600              | 10.448         | 36.850          | 2.48            | 1.40              | n.a.        |
| <b>Total:</b>       |           |                    | <b>422.128</b> | <b>2636.613</b> | <b>100.00</b>   | <b>100.00</b>     |             |

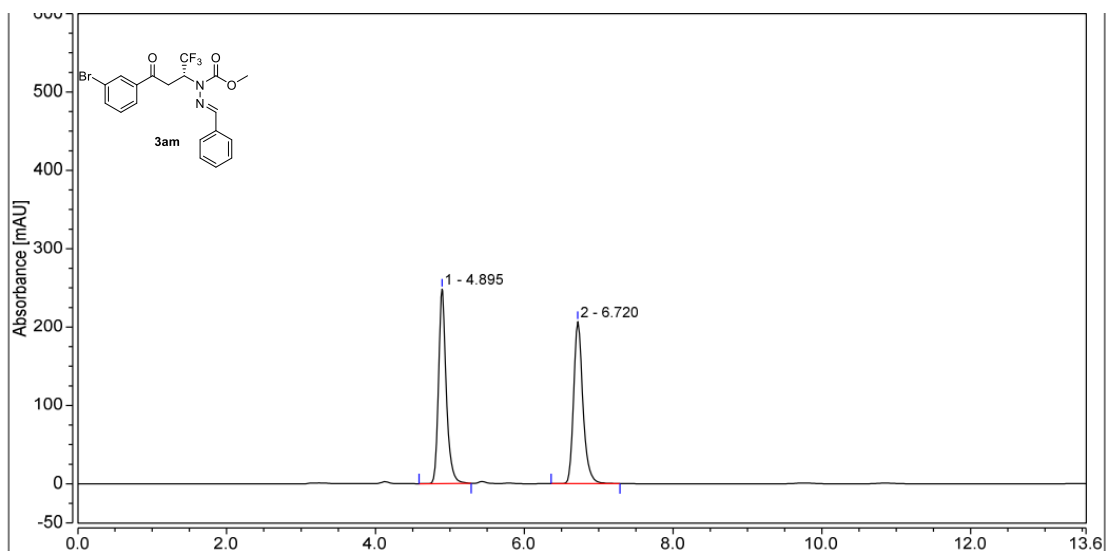

| Integration Results |           |                    |               |                |                 |                   |             |
|---------------------|-----------|--------------------|---------------|----------------|-----------------|-------------------|-------------|
| No.                 | Peak Name | Retention Time min | Area mAU*min  | Height mAU     | Relative Area % | Relative Height % | Amount n.a. |
| 1                   |           | 4.895              | 29.854        | 248.147        | 49.96           | 54.51             | n.a.        |
| 2                   |           | 6.720              | 29.906        | 207.054        | 50.04           | 45.49             | n.a.        |
| <b>Total:</b>       |           |                    | <b>59.760</b> | <b>455.201</b> | <b>100.00</b>   | <b>100.00</b>     |             |

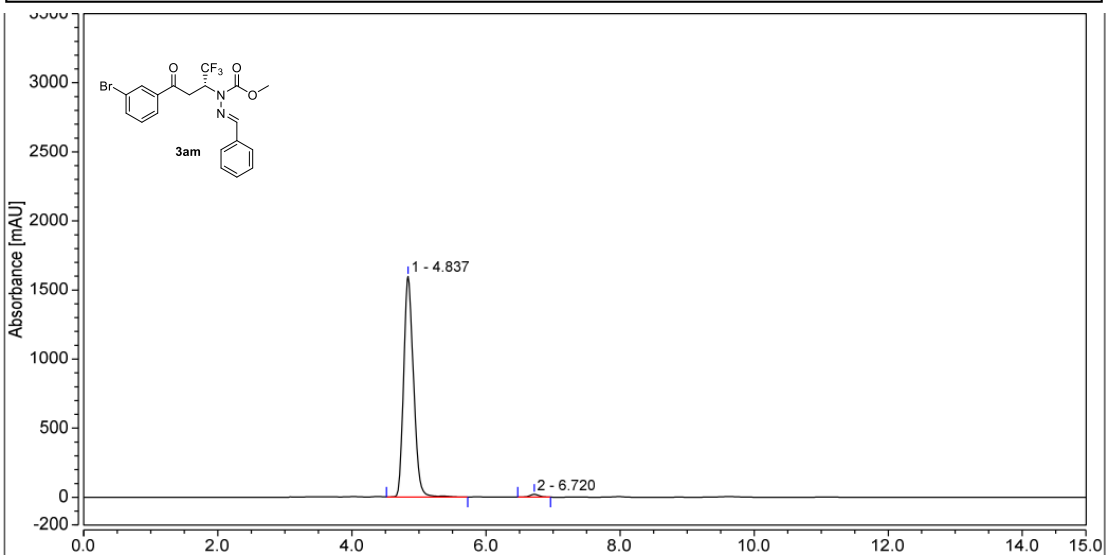

| Integration Results |           |                    |                |                 |                 |                   |             |
|---------------------|-----------|--------------------|----------------|-----------------|-----------------|-------------------|-------------|
| No.                 | Peak Name | Retention Time min | Area mAU*min   | Height mAU      | Relative Area % | Relative Height % | Amount n.a. |
| 1                   |           | 4.837              | 273.111        | 1595.772        | 98.80           | 98.73             | n.a.        |
| 2                   |           | 6.720              | 3.322          | 20.511          | 1.20            | 1.27              | n.a.        |
| <b>Total:</b>       |           |                    | <b>276.433</b> | <b>1616.284</b> | <b>100.00</b>   | <b>100.00</b>     |             |

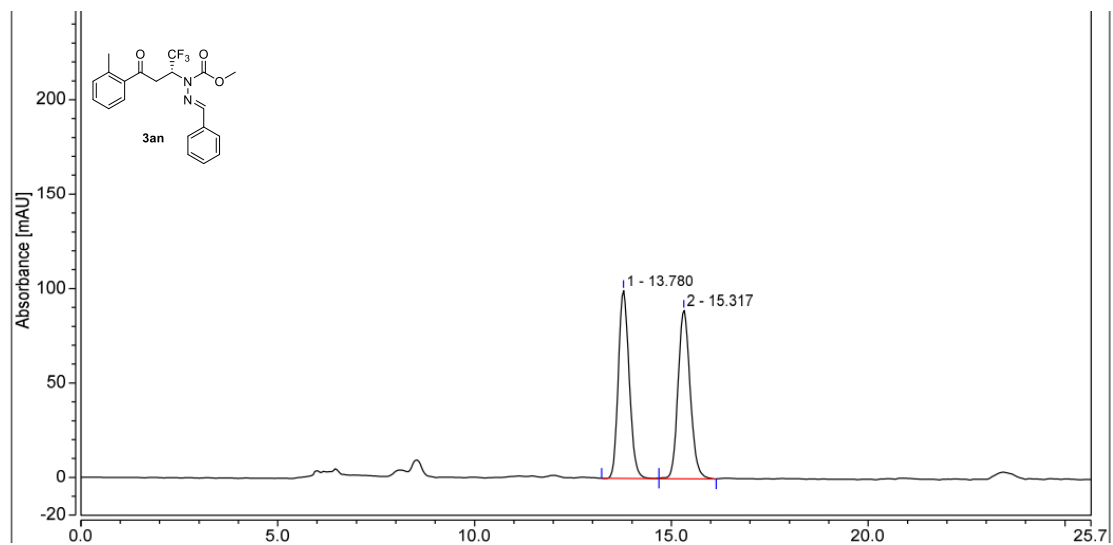

| Integration Results |           |                    |               |                |                 |                   |        |
|---------------------|-----------|--------------------|---------------|----------------|-----------------|-------------------|--------|
| No.                 | Peak Name | Retention Time min | Area mAU*min  | Height mAU     | Relative Area % | Relative Height % | Amount |
| 1                   |           | 13.780             | 31.808        | 99.586         | 49.77           | 52.71             | n.a.   |
| 2                   |           | 15.317             | 32.103        | 89.356         | 50.23           | 47.29             | n.a.   |
| <b>Total:</b>       |           |                    | <b>63.911</b> | <b>188.941</b> | <b>100.00</b>   | <b>100.00</b>     |        |

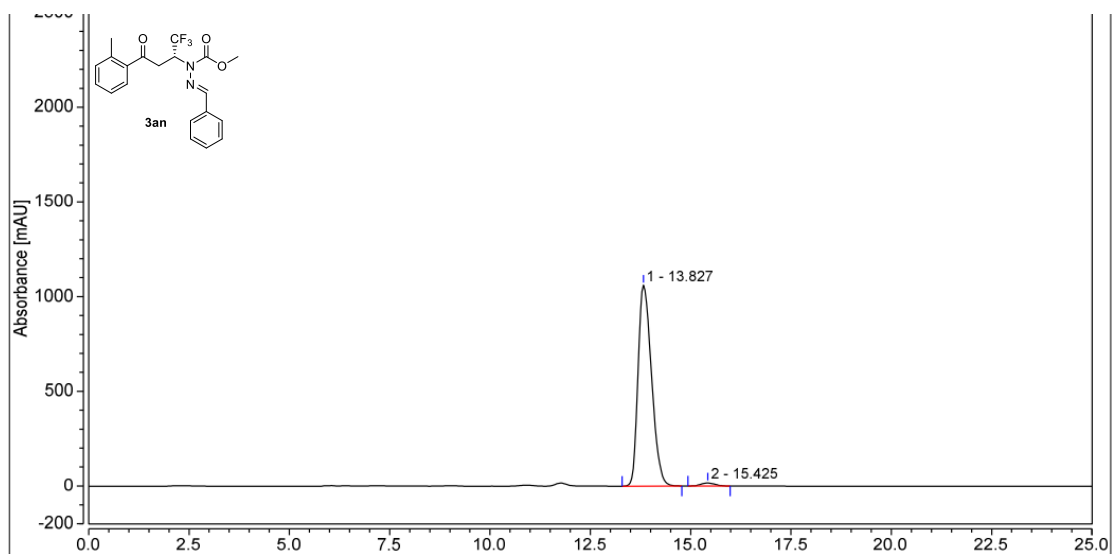

| Integration Results |           |                    |                |                 |                 |                   |        |
|---------------------|-----------|--------------------|----------------|-----------------|-----------------|-------------------|--------|
| No.                 | Peak Name | Retention Time min | Area mAU*min   | Height mAU      | Relative Area % | Relative Height % | Amount |
| 1                   |           | 13.827             | 413.776        | 1060.541        | 98.44           | 98.50             | n.a.   |
| 2                   |           | 15.425             | 6.551          | 16.128          | 1.56            | 1.50              | n.a.   |
| <b>Total:</b>       |           |                    | <b>420.328</b> | <b>1076.668</b> | <b>100.00</b>   | <b>100.00</b>     |        |



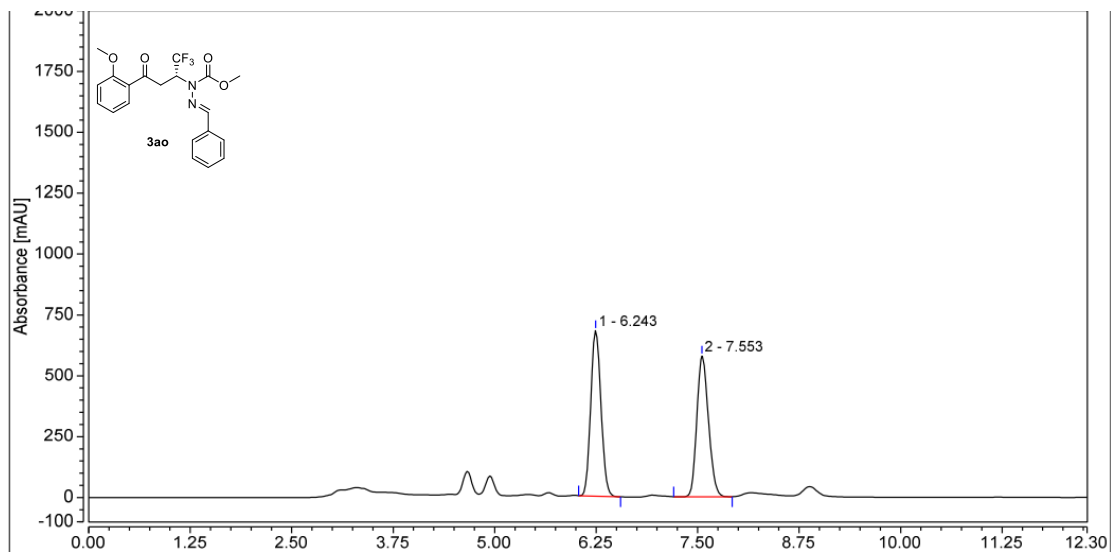

| Integration Results |           |                       |                 |                 |                    |                      |                |
|---------------------|-----------|-----------------------|-----------------|-----------------|--------------------|----------------------|----------------|
| No.                 | Peak Name | Retention Time<br>min | Area<br>mAU*min | Height<br>mAU   | Relative Area<br>% | Relative Height<br>% | Amount<br>n.a. |
| 1                   |           | 6.243                 | 99.863          | 680.453         | 50.97              | 54.07                | n.a.           |
| 2                   |           | 7.553                 | 96.071          | 578.040         | 49.03              | 45.93                | n.a.           |
| <b>Total:</b>       |           |                       | <b>195.934</b>  | <b>1258.493</b> | <b>100.00</b>      | <b>100.00</b>        |                |

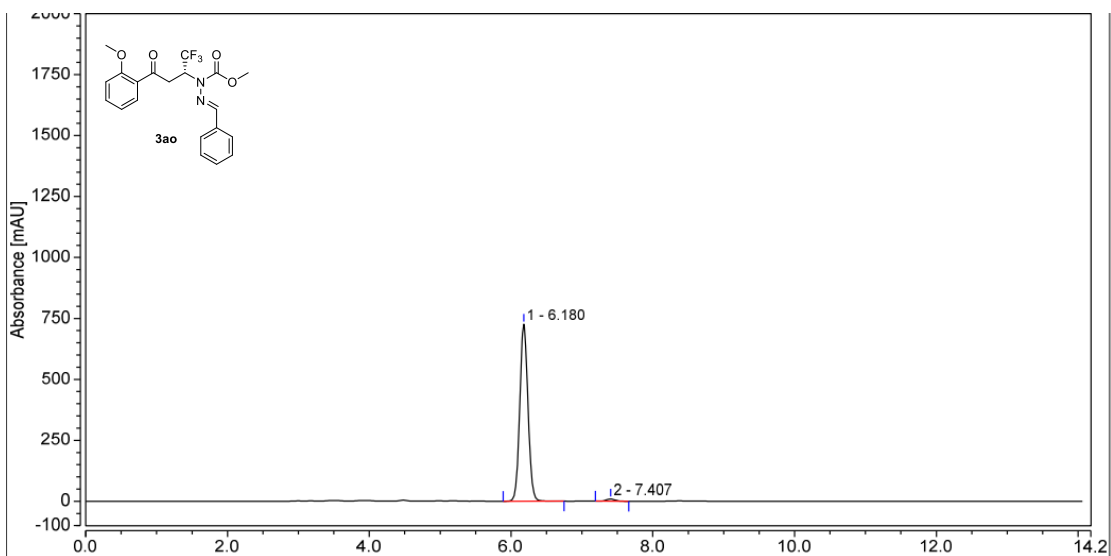

| Integration Results |           |                       |                 |                |                    |                      |                |
|---------------------|-----------|-----------------------|-----------------|----------------|--------------------|----------------------|----------------|
| No.                 | Peak Name | Retention Time<br>min | Area<br>mAU*min | Height<br>mAU  | Relative Area<br>% | Relative Height<br>% | Amount<br>n.a. |
| 1                   |           | 6.180                 | 96.905          | 725.746        | 98.68              | 98.79                | n.a.           |
| 2                   |           | 7.407                 | 1.294           | 8.853          | 1.32               | 1.21                 | n.a.           |
| <b>Total:</b>       |           |                       | <b>98.199</b>   | <b>734.599</b> | <b>100.00</b>      | <b>100.00</b>        |                |

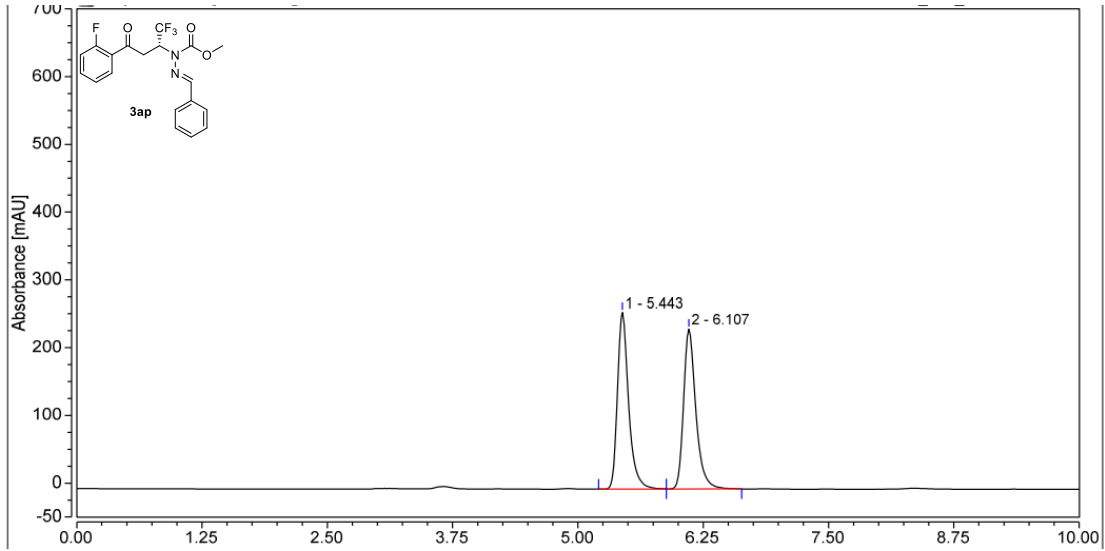

| Integration Results |           |                       |                 |                |                    |                      |                |
|---------------------|-----------|-----------------------|-----------------|----------------|--------------------|----------------------|----------------|
| No.                 | Peak Name | Retention Time<br>min | Area<br>mAU*min | Height<br>mAU  | Relative Area<br>% | Relative Height<br>% | Amount<br>n.a. |
| 1                   |           | 5.443                 | 33.470          | 260.575        | 50.13              | 52.48                | n.a.           |
| 2                   |           | 6.107                 | 33.301          | 235.932        | 49.87              | 47.52                | n.a.           |
| <b>Total:</b>       |           |                       | <b>66.771</b>   | <b>496.507</b> | <b>100.00</b>      | <b>100.00</b>        |                |

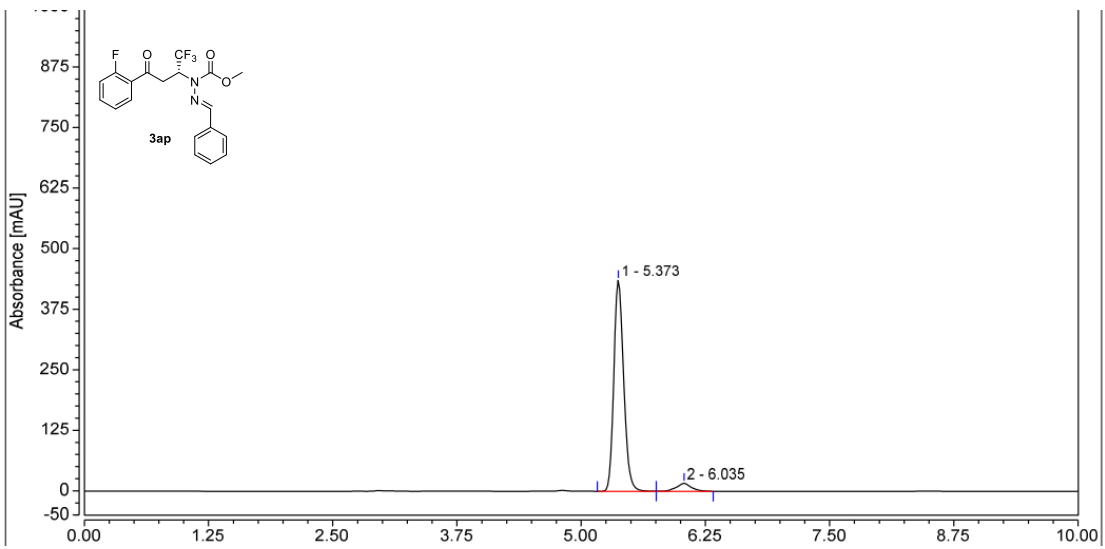

| Integration Results |           |                       |                 |                |                    |                      |                |
|---------------------|-----------|-----------------------|-----------------|----------------|--------------------|----------------------|----------------|
| No.                 | Peak Name | Retention Time<br>min | Area<br>mAU*min | Height<br>mAU  | Relative Area<br>% | Relative Height<br>% | Amount<br>n.a. |
| 1                   |           | 5.373                 | 50.140          | 435.424        | 94.60              | 96.39                | n.a.           |
| 2                   |           | 6.035                 | 2.863           | 16.325         | 5.40               | 3.61                 | n.a.           |
| <b>Total:</b>       |           |                       | <b>53.003</b>   | <b>451.749</b> | <b>100.00</b>      | <b>100.00</b>        |                |

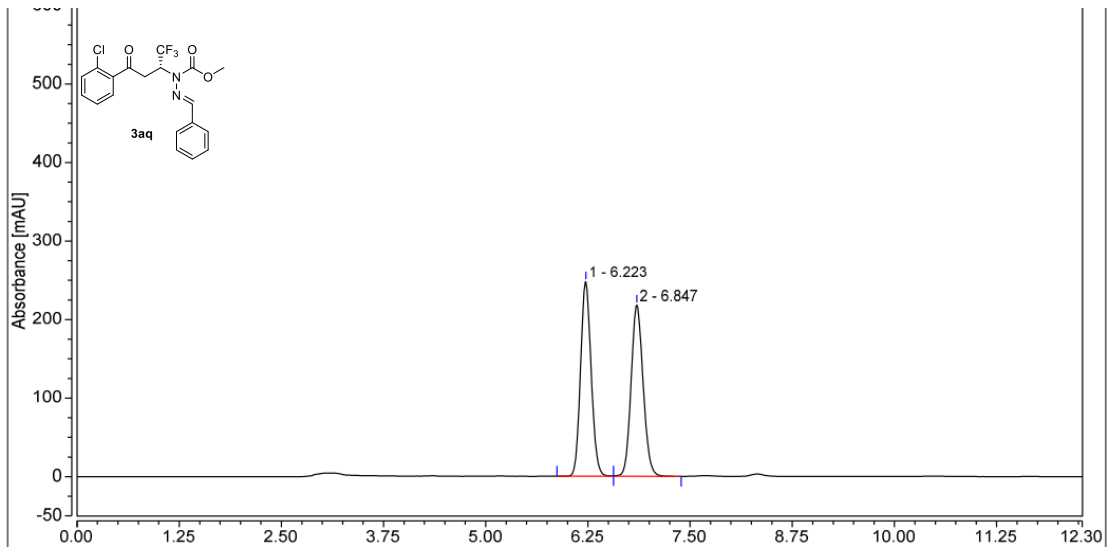

| Integration Results |           |                    |               |                |                 |                   |             |
|---------------------|-----------|--------------------|---------------|----------------|-----------------|-------------------|-------------|
| No.                 | Peak Name | Retention Time min | Area mAU*min  | Height mAU     | Relative Area % | Relative Height % | Amount n.a. |
| 1                   |           | 6.223              | 37.319        | 247.621        | 49.94           | 53.17             | n.a.        |
| 2                   |           | 6.847              | 37.415        | 218.055        | 50.06           | 46.83             | n.a.        |
| <b>Total:</b>       |           |                    | <b>74.734</b> | <b>465.676</b> | <b>100.00</b>   | <b>100.00</b>     |             |

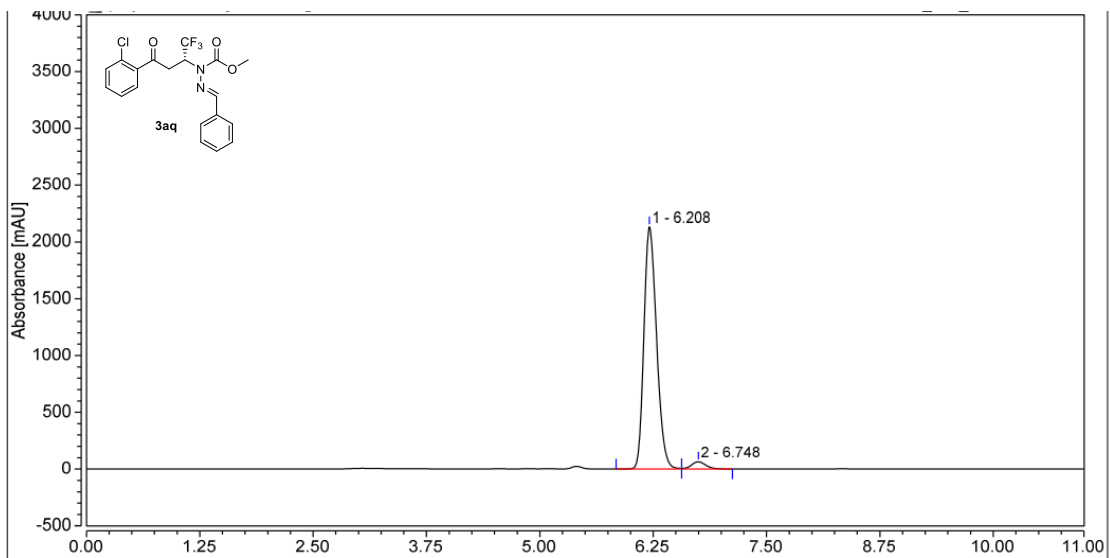

| Integration Results |           |                    |                |                 |                 |                   |             |
|---------------------|-----------|--------------------|----------------|-----------------|-----------------|-------------------|-------------|
| No.                 | Peak Name | Retention Time min | Area mAU*min   | Height mAU      | Relative Area % | Relative Height % | Amount n.a. |
| 1                   |           | 6.208              | 344.479        | 2132.262        | 96.79           | 97.13             | n.a.        |
| 2                   |           | 6.748              | 11.406         | 63.026          | 3.21            | 2.87              | n.a.        |
| <b>Total:</b>       |           |                    | <b>355.886</b> | <b>2195.288</b> | <b>100.00</b>   | <b>100.00</b>     |             |

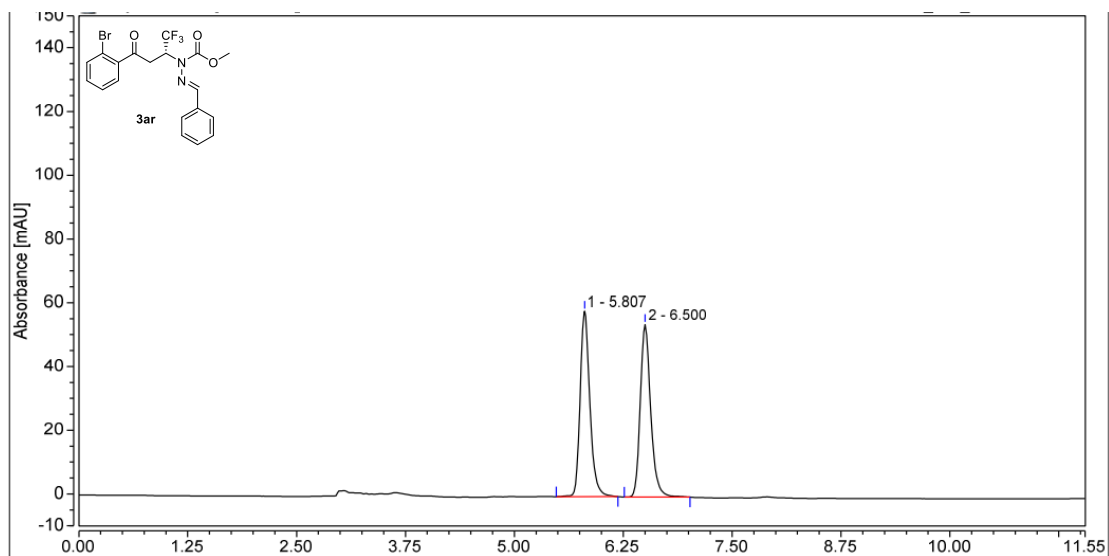

| Integration Results |           |                       |                 |                |                    |                      |                |
|---------------------|-----------|-----------------------|-----------------|----------------|--------------------|----------------------|----------------|
| No.                 | Peak Name | Retention Time<br>min | Area<br>mAU*min | Height<br>mAU  | Relative Area<br>% | Relative Height<br>% | Amount<br>n.a. |
| 1                   |           | 5.807                 | 7.531           | 58.193         | 49.97              | 51.78                | n.a.           |
| 2                   |           | 6.500                 | 7.538           | 54.190         | 50.03              | 48.22                | n.a.           |
| <b>Total:</b>       |           |                       | <b>15.069</b>   | <b>112.383</b> | <b>100.00</b>      | <b>100.00</b>        |                |

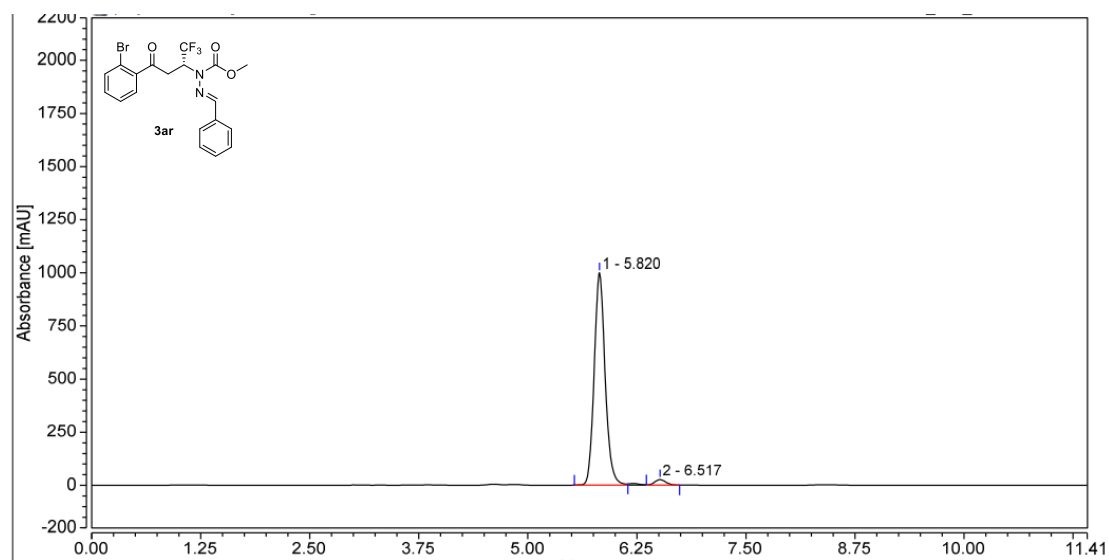

| Integration Results |           |                       |                 |                 |                    |                      |                |
|---------------------|-----------|-----------------------|-----------------|-----------------|--------------------|----------------------|----------------|
| No.                 | Peak Name | Retention Time<br>min | Area<br>mAU*min | Height<br>mAU   | Relative Area<br>% | Relative Height<br>% | Amount<br>n.a. |
| 1                   |           | 5.820                 | 145.891         | 998.810         | 97.42              | 97.46                | n.a.           |
| 2                   |           | 6.517                 | 3.867           | 26.055          | 2.58               | 2.54                 | n.a.           |
| <b>Total:</b>       |           |                       | <b>149.758</b>  | <b>1024.865</b> | <b>100.00</b>      | <b>100.00</b>        |                |

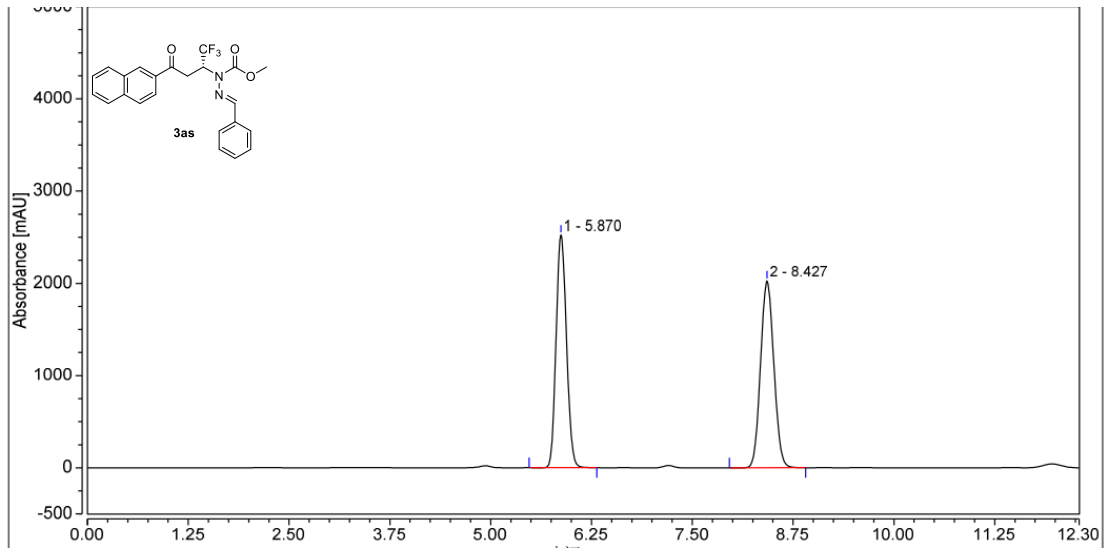

| Integration Results |           |                    |                |                 |                 |                   |             |
|---------------------|-----------|--------------------|----------------|-----------------|-----------------|-------------------|-------------|
| No.                 | Peak Name | Retention Time min | Area mAU*min   | Height mAU      | Relative Area % | Relative Height % | Amount n.a. |
| 1                   |           | 5.870              | 376.340        | 2521.603        | 49.23           | 55.45             | n.a.        |
| 2                   |           | 8.427              | 388.144        | 2025.979        | 50.77           | 44.55             | n.a.        |
| <b>Total:</b>       |           |                    | <b>764.484</b> | <b>4547.582</b> | <b>100.00</b>   | <b>100.00</b>     |             |

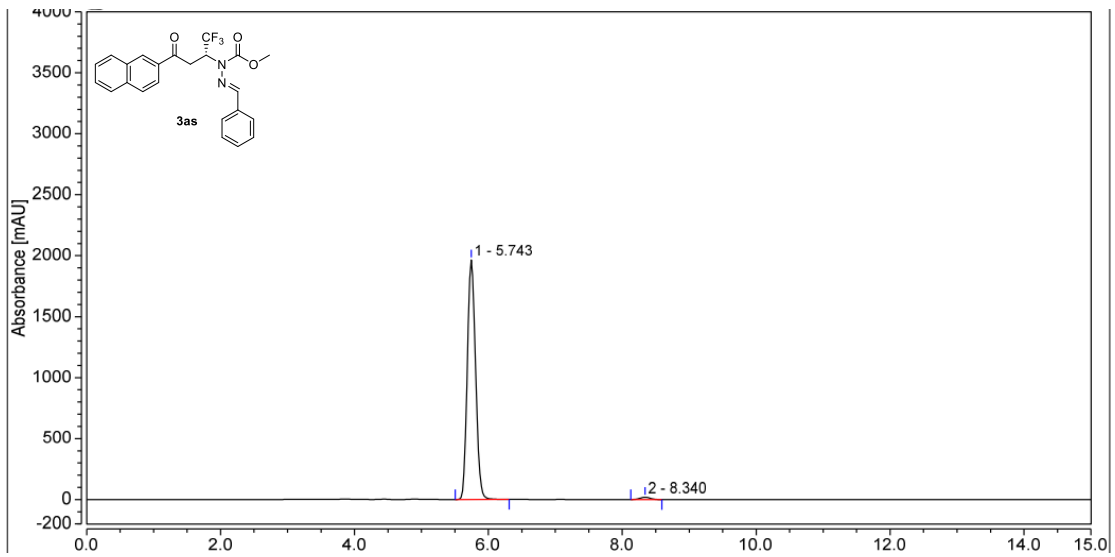

| Integration Results |           |                    |                |                 |                 |                   |             |
|---------------------|-----------|--------------------|----------------|-----------------|-----------------|-------------------|-------------|
| No.                 | Peak Name | Retention Time min | Area mAU*min   | Height mAU      | Relative Area % | Relative Height % | Amount n.a. |
| 1                   |           | 5.743              | 280.648        | 1964.751        | 98.79           | 99.02             | n.a.        |
| 2                   |           | 8.340              | 3.425          | 19.421          | 1.21            | 0.98              | n.a.        |
| <b>Total:</b>       |           |                    | <b>284.073</b> | <b>1984.173</b> | <b>100.00</b>   | <b>100.00</b>     |             |

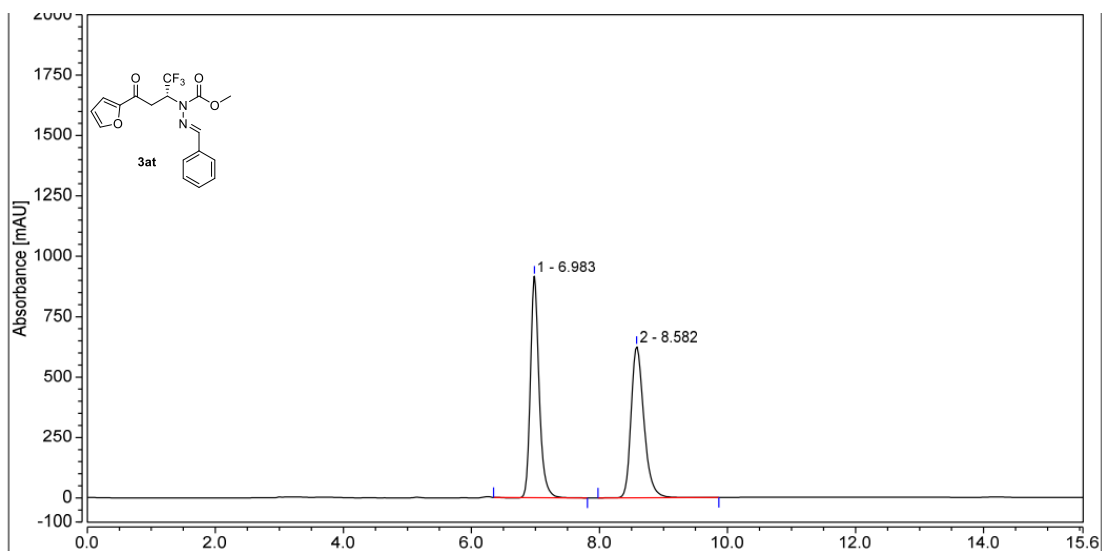

| Integration Results |           |                    |                |                 |                 |                   |        |
|---------------------|-----------|--------------------|----------------|-----------------|-----------------|-------------------|--------|
| No.                 | Peak Name | Retention Time min | Area mAU*min   | Height mAU      | Relative Area % | Relative Height % | Amount |
| 1                   |           | 6.983              | 145.762        | 916.815         | 50.12           | 59.40             | n.a.   |
| 2                   |           | 8.582              | 145.048        | 626.570         | 49.88           | 40.60             | n.a.   |
| <b>Total:</b>       |           |                    | <b>290.810</b> | <b>1543.385</b> | <b>100.00</b>   | <b>100.00</b>     |        |

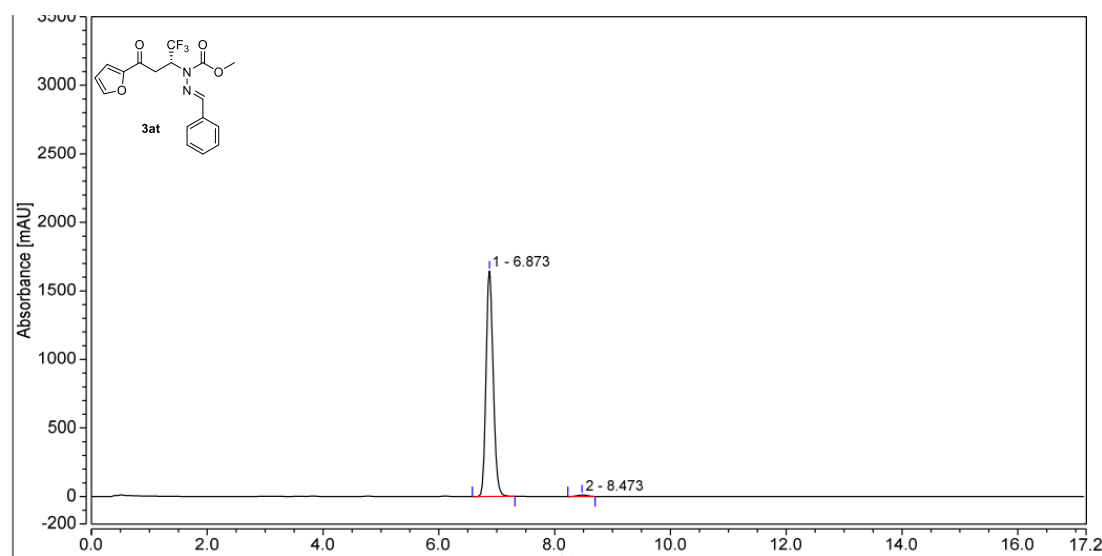

| Integration Results |           |                    |                |                 |                 |                   |        |
|---------------------|-----------|--------------------|----------------|-----------------|-----------------|-------------------|--------|
| No.                 | Peak Name | Retention Time min | Area mAU*min   | Height mAU      | Relative Area % | Relative Height % | Amount |
| 1                   |           | 6.873              | 234.404        | 1644.048        | 99.05           | 99.31             | n.a.   |
| 2                   |           | 8.473              | 2.241          | 11.481          | 0.95            | 0.69              | n.a.   |
| <b>Total:</b>       |           |                    | <b>236.645</b> | <b>1655.529</b> | <b>100.00</b>   | <b>100.00</b>     |        |

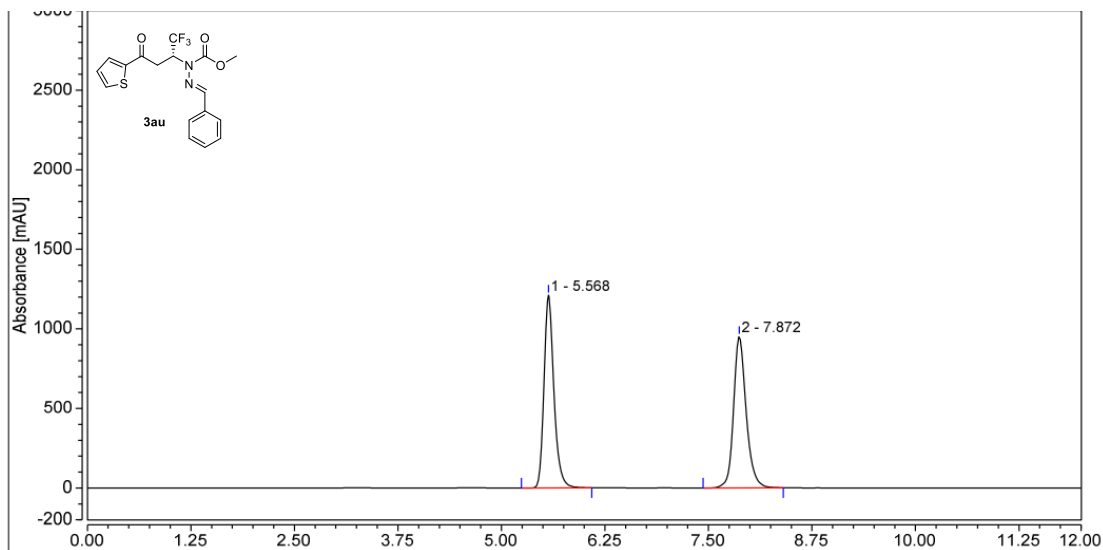

| Integration Results |           |                       |                 |                 |                    |                      |                |
|---------------------|-----------|-----------------------|-----------------|-----------------|--------------------|----------------------|----------------|
| No.                 | Peak Name | Retention Time<br>min | Area<br>mAU*min | Height<br>mAU   | Relative Area<br>% | Relative Height<br>% | Amount<br>n.a. |
| 1                   |           | 5.568                 | 168.141         | 1211.268        | 50.02              | 56.01                | n.a.           |
| 2                   |           | 7.872                 | 168.022         | 951.480         | 49.98              | 43.99                | n.a.           |
| <b>Total:</b>       |           |                       | <b>336.163</b>  | <b>2162.748</b> | <b>100.00</b>      | <b>100.00</b>        |                |

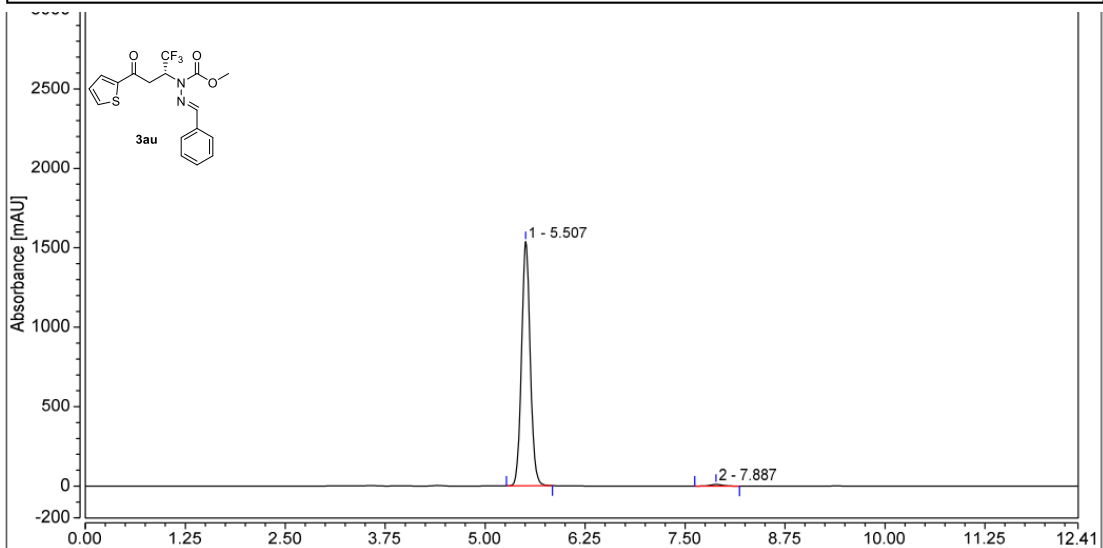

| Integration Results |           |                       |                 |                 |                    |                      |                |
|---------------------|-----------|-----------------------|-----------------|-----------------|--------------------|----------------------|----------------|
| No.                 | Peak Name | Retention Time<br>min | Area<br>mAU*min | Height<br>mAU   | Relative Area<br>% | Relative Height<br>% | Amount<br>n.a. |
| 1                   |           | 5.507                 | 193.354         | 1536.690        | 99.01              | 99.30                | n.a.           |
| 2                   |           | 7.887                 | 1.935           | 10.778          | 0.99               | 0.70                 | n.a.           |
| <b>Total:</b>       |           |                       | <b>195.289</b>  | <b>1547.468</b> | <b>100.00</b>      | <b>100.00</b>        |                |

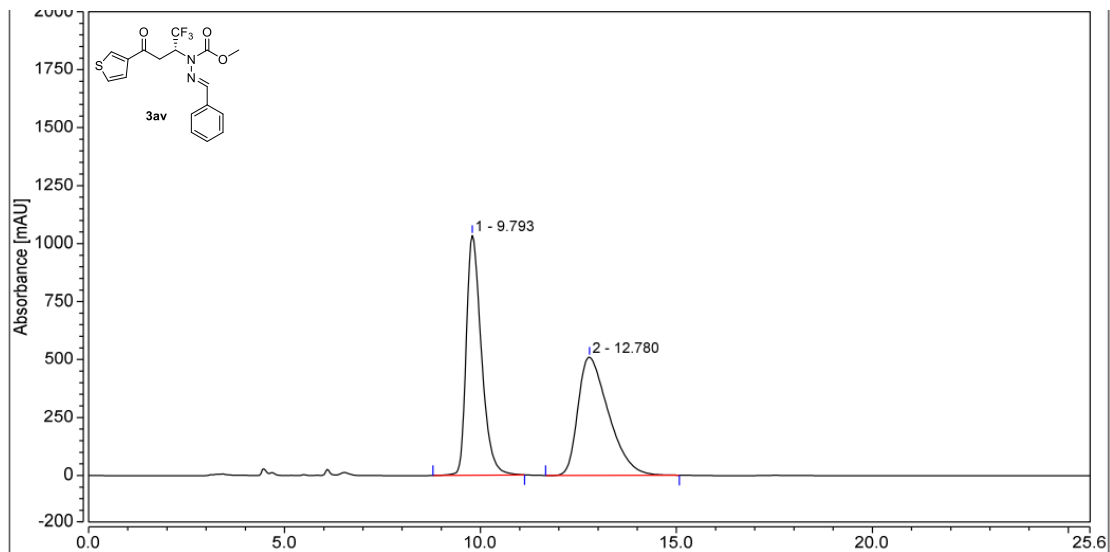

| Integration Results |           |                       |                 |                 |                    |                      |                |
|---------------------|-----------|-----------------------|-----------------|-----------------|--------------------|----------------------|----------------|
| No.                 | Peak Name | Retention Time<br>min | Area<br>mAU*min | Height<br>mAU   | Relative Area<br>% | Relative Height<br>% | Amount<br>n.a. |
| 1                   |           | 9.793                 | 461.241         | 1033.374        | 50.05              | 66.96                | n.a.           |
| 2                   |           | 12.780                | 460.394         | 509.937         | 49.95              | 33.04                | n.a.           |
| <b>Total:</b>       |           |                       | <b>921.635</b>  | <b>1543.311</b> | <b>100.00</b>      | <b>100.00</b>        |                |

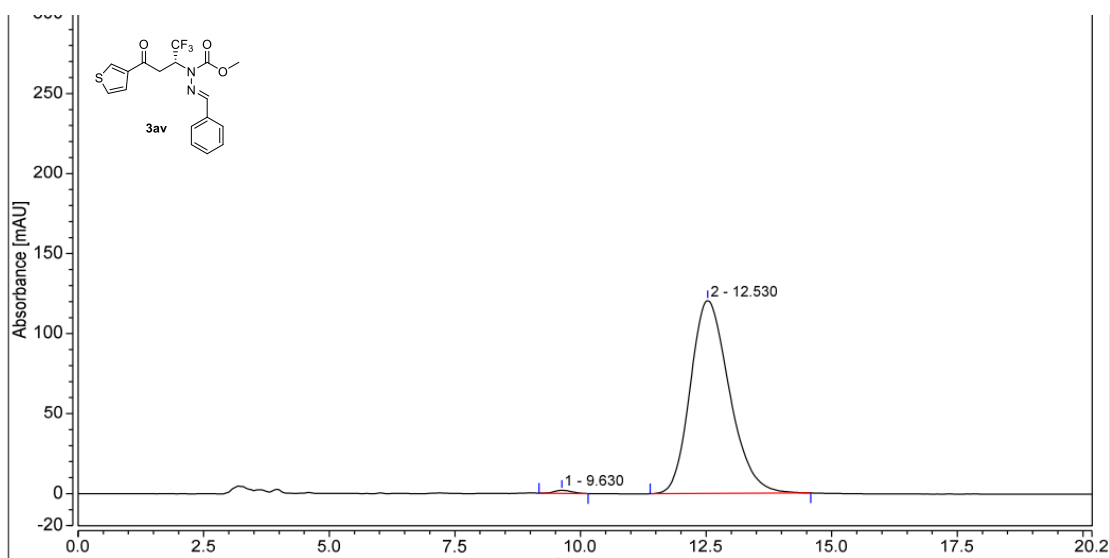

| Integration Results |           |                       |                 |                |                    |                      |                |
|---------------------|-----------|-----------------------|-----------------|----------------|--------------------|----------------------|----------------|
| No.                 | Peak Name | Retention Time<br>min | Area<br>mAU*min | Height<br>mAU  | Relative Area<br>% | Relative Height<br>% | Amount<br>n.a. |
| 1                   |           | 9.630                 | 0.748           | 1.879          | 0.68               | 1.54                 | n.a.           |
| 2                   |           | 12.530                | 108.625         | 120.427        | 99.32              | 98.46                | n.a.           |
| <b>Total:</b>       |           |                       | <b>109.373</b>  | <b>122.306</b> | <b>100.00</b>      | <b>100.00</b>        |                |



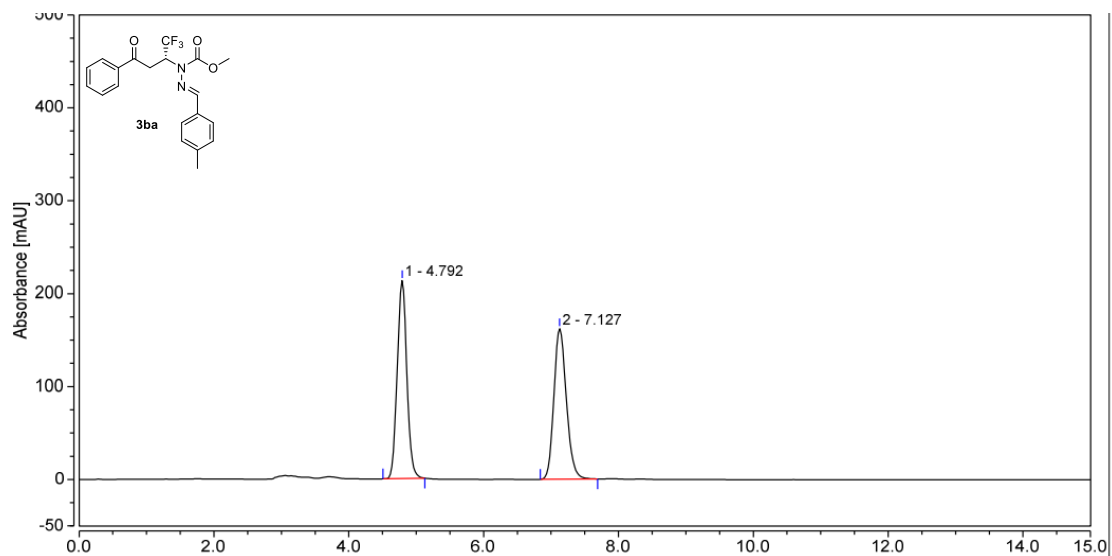

| Integration Results |           |                    |               |                |                 |                   |        |
|---------------------|-----------|--------------------|---------------|----------------|-----------------|-------------------|--------|
| No.                 | Peak Name | Retention Time min | Area mAU*min  | Height mAU     | Relative Area % | Relative Height % | Amount |
| 1                   |           | 4.792              | 35.249        | 213.114        | 50.44           | 56.81             | n.a.   |
| 2                   |           | 7.127              | 34.637        | 161.997        | 49.56           | 43.19             | n.a.   |
| <b>Total:</b>       |           |                    | <b>69.886</b> | <b>375.111</b> | <b>100.00</b>   | <b>100.00</b>     |        |

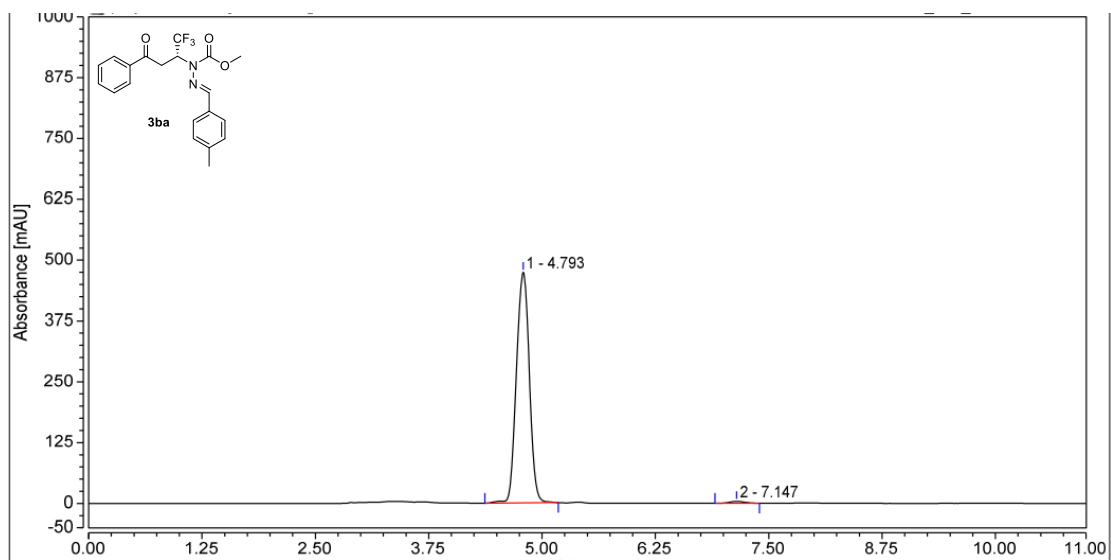

| Integration Results |           |                    |               |                |                 |                   |        |
|---------------------|-----------|--------------------|---------------|----------------|-----------------|-------------------|--------|
| No.                 | Peak Name | Retention Time min | Area mAU*min  | Height mAU     | Relative Area % | Relative Height % | Amount |
| 1                   |           | 4.793              | 78.667        | 473.796        | 99.02           | 99.18             | n.a.   |
| 2                   |           | 7.147              | 0.780         | 3.929          | 0.98            | 0.82              | n.a.   |
| <b>Total:</b>       |           |                    | <b>79.447</b> | <b>477.724</b> | <b>100.00</b>   | <b>100.00</b>     |        |

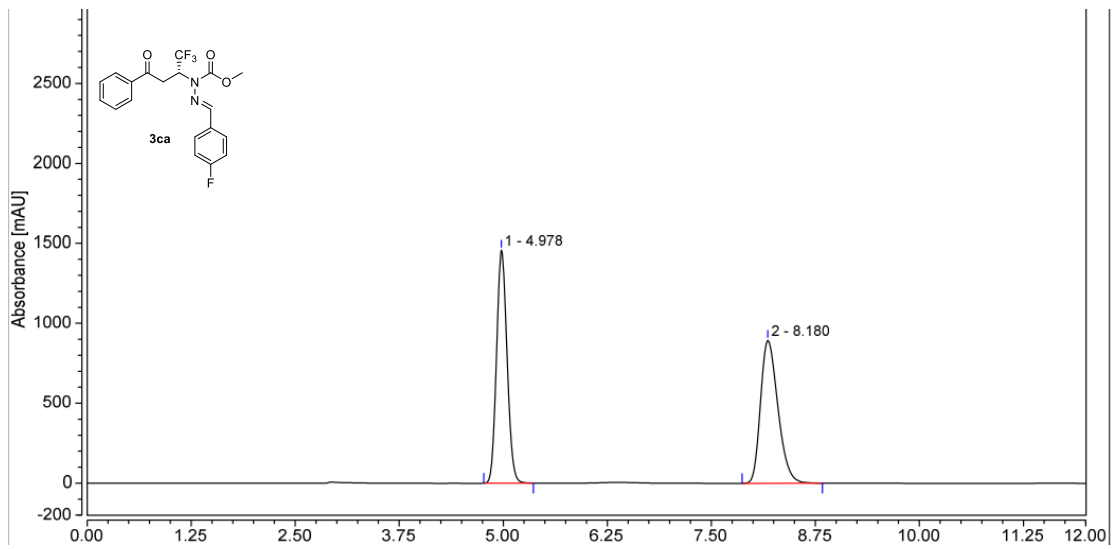

| Integration Results |           |                    |                |                 |                 |                   |        |
|---------------------|-----------|--------------------|----------------|-----------------|-----------------|-------------------|--------|
| No.                 | Peak Name | Retention Time min | Area mAU*min   | Height mAU      | Relative Area % | Relative Height % | Amount |
| 1                   |           | 4.978              | 213.499        | 1458.010        | 49.64           | 61.97             | n.a.   |
| 2                   |           | 8.180              | 216.561        | 894.790         | 50.36           | 38.03             | n.a.   |
| <b>Total:</b>       |           |                    | <b>430.060</b> | <b>2352.800</b> | <b>100.00</b>   | <b>100.00</b>     |        |

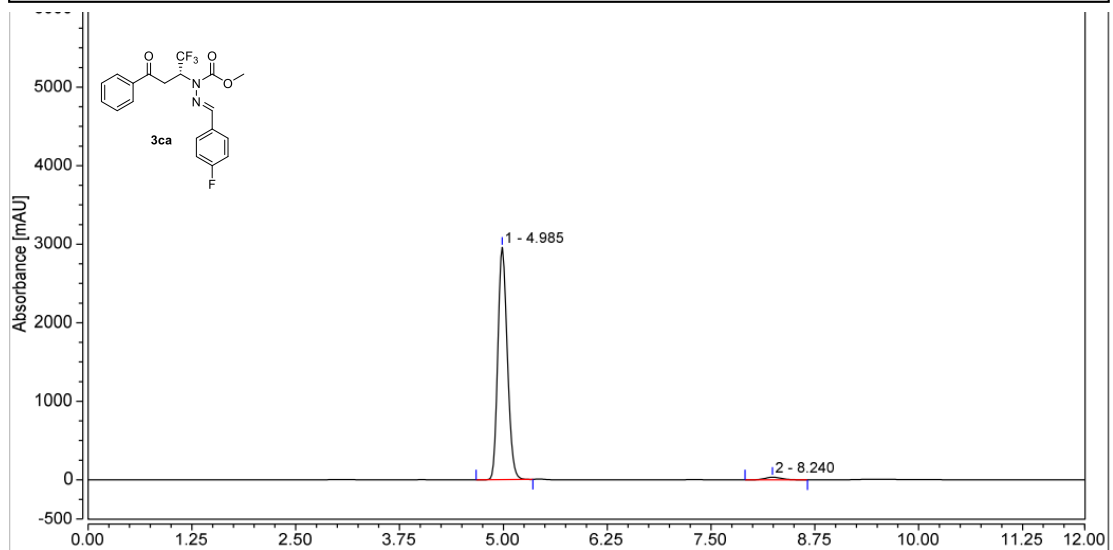

| Integration Results |           |                    |                |                 |                 |                   |        |
|---------------------|-----------|--------------------|----------------|-----------------|-----------------|-------------------|--------|
| No.                 | Peak Name | Retention Time min | Area mAU*min   | Height mAU      | Relative Area % | Relative Height % | Amount |
| 1                   |           | 4.985              | 390.805        | 2957.487        | 98.11           | 98.92             | n.a.   |
| 2                   |           | 8.240              | 7.509          | 32.177          | 1.89            | 1.08              | n.a.   |
| <b>Total:</b>       |           |                    | <b>398.314</b> | <b>2989.663</b> | <b>100.00</b>   | <b>100.00</b>     |        |

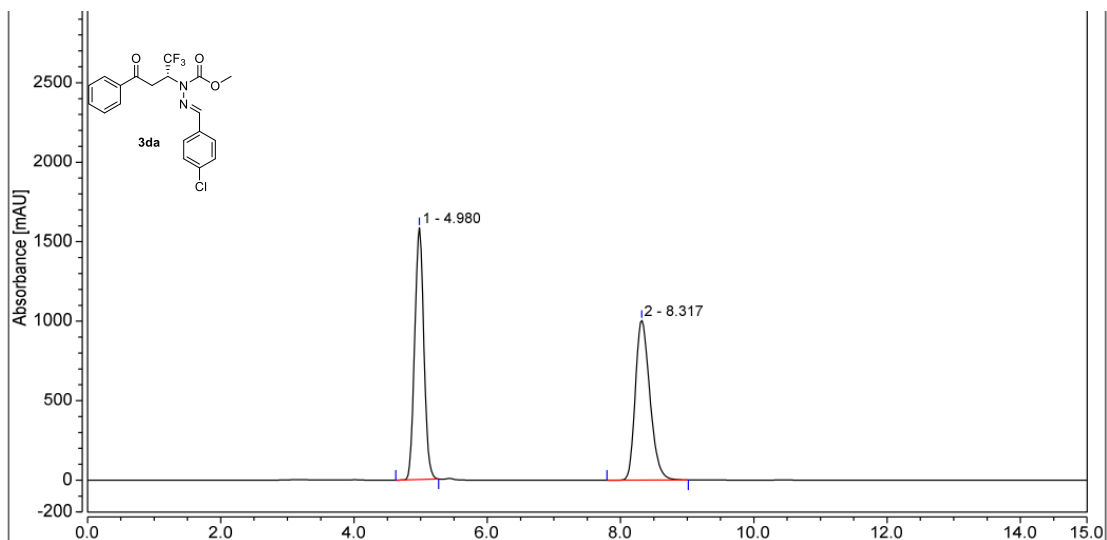

| Integration Results |           |                    |                |                 |                 |                   |        |
|---------------------|-----------|--------------------|----------------|-----------------|-----------------|-------------------|--------|
| No.                 | Peak Name | Retention Time min | Area mAU*min   | Height mAU      | Relative Area % | Relative Height % | Amount |
| 1                   |           | 4.980              | 251.357        | 1583.268        | 49.69           | 61.17             | n.a.   |
| 2                   |           | 8.317              | 254.464        | 1004.882        | 50.31           | 38.83             | n.a.   |
| <b>Total:</b>       |           |                    | <b>505.821</b> | <b>2588.150</b> | <b>100.00</b>   | <b>100.00</b>     |        |

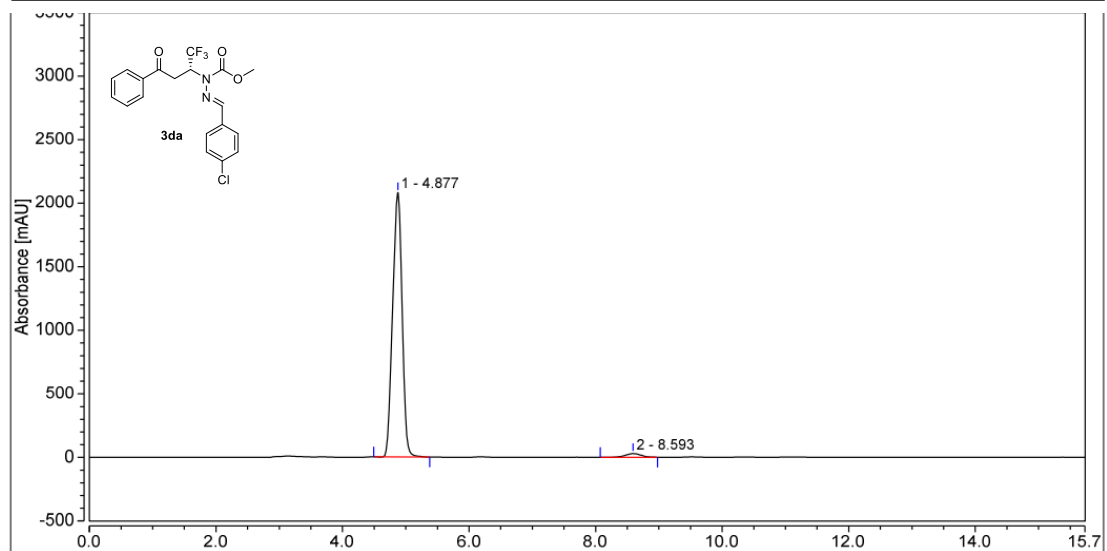

| Integration Results |           |                    |                |                 |                 |                   |        |
|---------------------|-----------|--------------------|----------------|-----------------|-----------------|-------------------|--------|
| No.                 | Peak Name | Retention Time min | Area mAU*min   | Height mAU      | Relative Area % | Relative Height % | Amount |
| 1                   |           | 4.877              | 360.112        | 2081.281        | 97.78           | 98.64             | n.a.   |
| 2                   |           | 8.593              | 8.185          | 28.662          | 2.22            | 1.36              | n.a.   |
| <b>Total:</b>       |           |                    | <b>368.297</b> | <b>2109.943</b> | <b>100.00</b>   | <b>100.00</b>     |        |

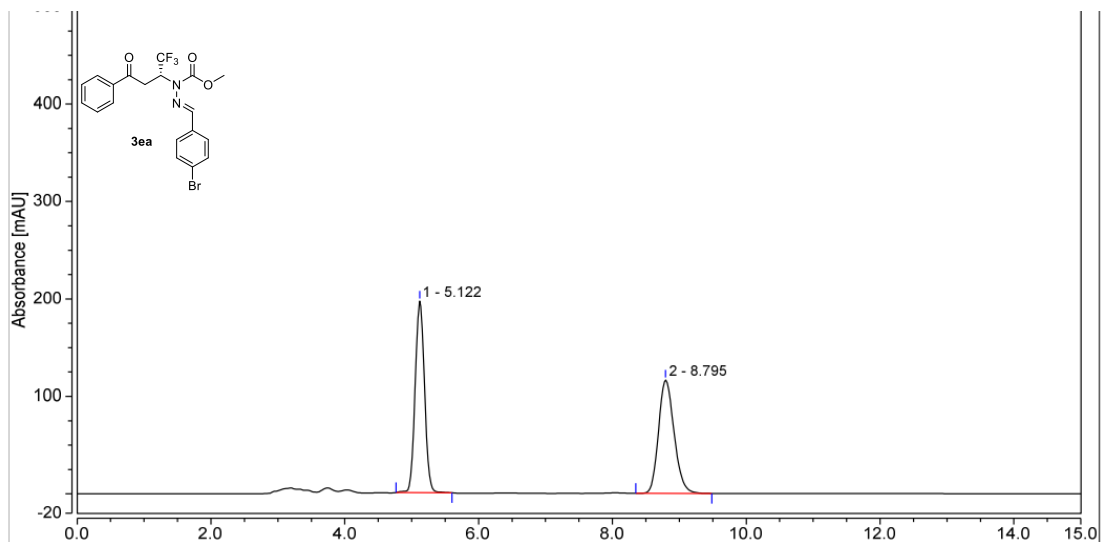

| Integration Results |           |                    |               |                |                 |                   |             |
|---------------------|-----------|--------------------|---------------|----------------|-----------------|-------------------|-------------|
| No.                 | Peak Name | Retention Time min | Area mAU*min  | Height mAU     | Relative Area % | Relative Height % | Amount n.a. |
| 1                   |           | 5.122              | 31.943        | 196.552        | 50.42           | 62.80             | n.a.        |
| 2                   |           | 8.795              | 31.407        | 116.423        | 49.58           | 37.20             | n.a.        |
| <b>Total:</b>       |           |                    | <b>63.350</b> | <b>312.975</b> | <b>100.00</b>   | <b>100.00</b>     |             |

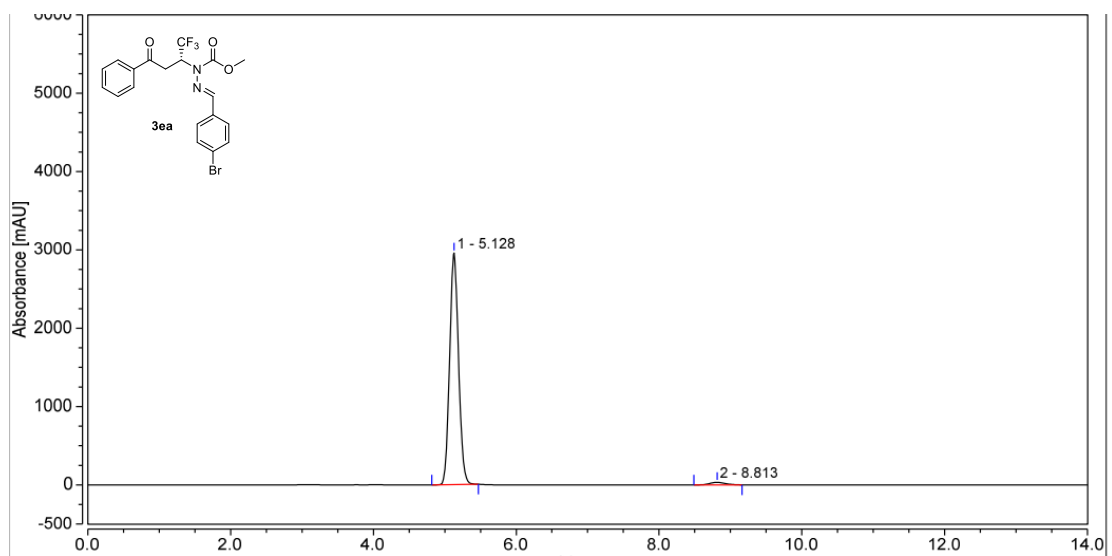

| Integration Results |           |                    |                |                 |                 |                   |             |
|---------------------|-----------|--------------------|----------------|-----------------|-----------------|-------------------|-------------|
| No.                 | Peak Name | Retention Time min | Area mAU*min   | Height mAU      | Relative Area % | Relative Height % | Amount n.a. |
| 1                   |           | 5.128              | 426.667        | 2956.789        | 98.08           | 98.92             | n.a.        |
| 2                   |           | 8.813              | 8.333          | 32.155          | 1.92            | 1.08              | n.a.        |
| <b>Total:</b>       |           |                    | <b>435.000</b> | <b>2988.944</b> | <b>100.00</b>   | <b>100.00</b>     |             |

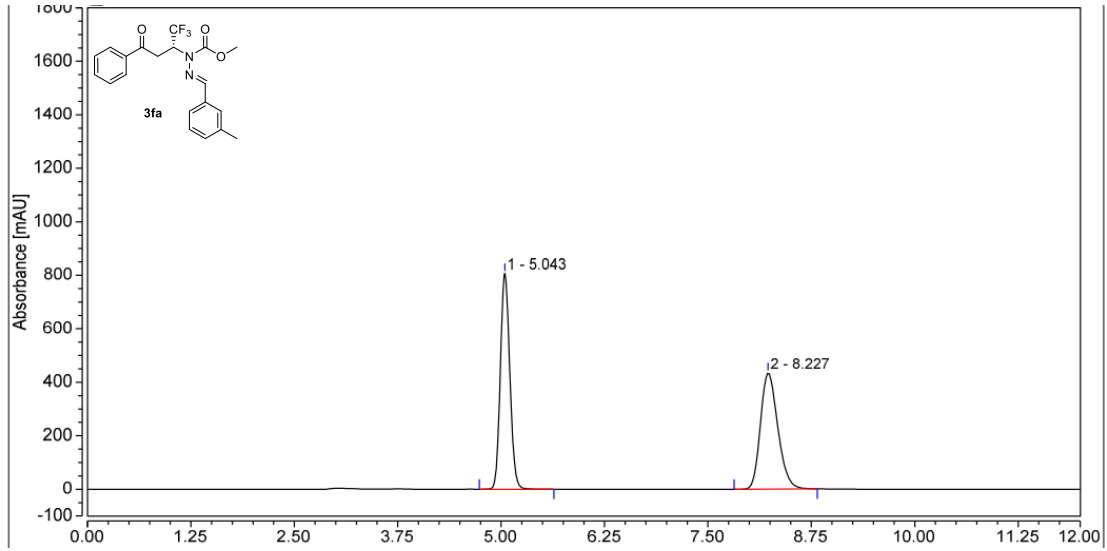

| Integration Results |           |                       |                 |                 |                    |                      |                |
|---------------------|-----------|-----------------------|-----------------|-----------------|--------------------|----------------------|----------------|
| No.                 | Peak Name | Retention Time<br>min | Area<br>mAU*min | Height<br>mAU   | Relative Area<br>% | Relative Height<br>% | Amount<br>n.a. |
| 1                   |           | 5.043                 | 106.415         | 806.498         | 50.17              | 65.01                | n.a.           |
| 2                   |           | 8.227                 | 105.715         | 434.042         | 49.83              | 34.99                | n.a.           |
| <b>Total:</b>       |           |                       | <b>212.130</b>  | <b>1240.540</b> | <b>100.00</b>      | <b>100.00</b>        |                |

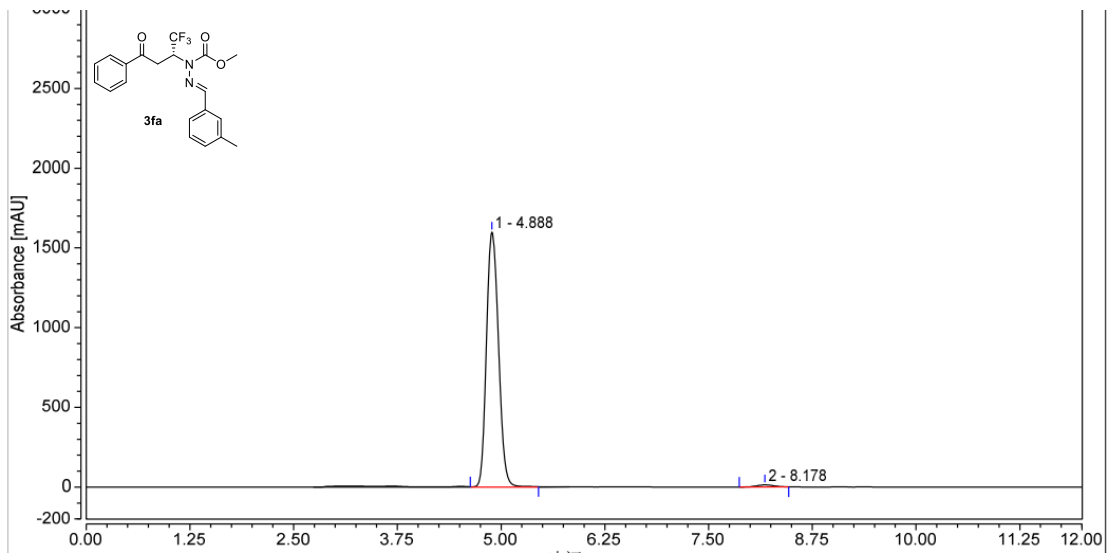

| Integration Results |           |                       |                 |                 |                    |                      |                |
|---------------------|-----------|-----------------------|-----------------|-----------------|--------------------|----------------------|----------------|
| No.                 | Peak Name | Retention Time<br>min | Area<br>mAU*min | Height<br>mAU   | Relative Area<br>% | Relative Height<br>% | Amount<br>n.a. |
| 1                   |           | 4.888                 | 269.692         | 1599.618        | 98.88              | 99.20                | n.a.           |
| 2                   |           | 8.178                 | 3.045           | 12.853          | 1.12               | 0.80                 | n.a.           |
| <b>Total:</b>       |           |                       | <b>272.737</b>  | <b>1612.471</b> | <b>100.00</b>      | <b>100.00</b>        |                |

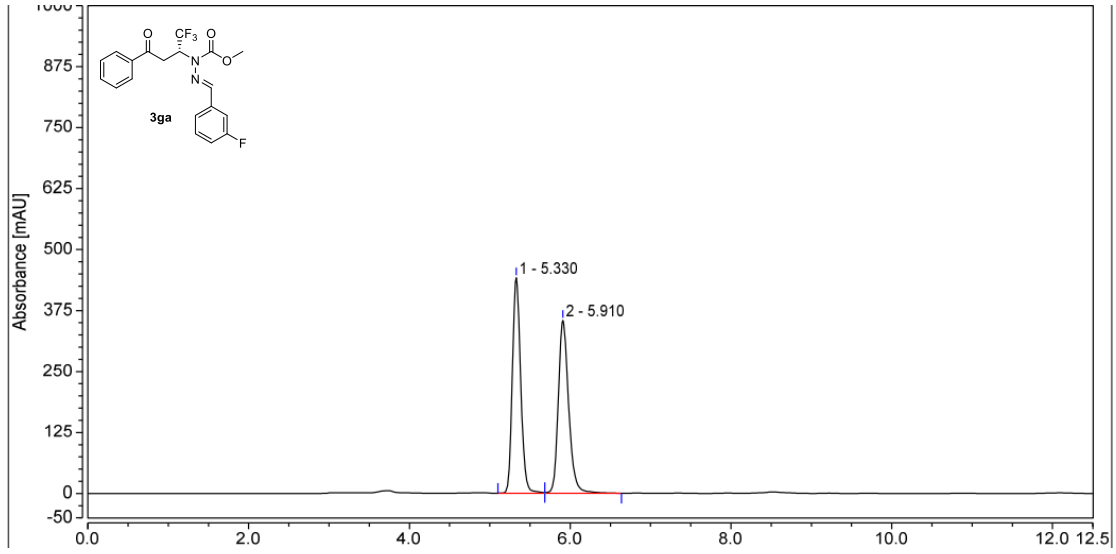

| Integration Results |           |                       |                 |                |                    |                      |                |
|---------------------|-----------|-----------------------|-----------------|----------------|--------------------|----------------------|----------------|
| No.                 | Peak Name | Retention Time<br>min | Area<br>mAU*min | Height<br>mAU  | Relative Area<br>% | Relative Height<br>% | Amount<br>n.a. |
| 1                   |           | 5.330                 | 52.752          | 441.583        | 49.81              | 55.47                | n.a.           |
| 2                   |           | 5.910                 | 53.153          | 354.465        | 50.19              | 44.53                | n.a.           |
| <b>Total:</b>       |           |                       | <b>105.905</b>  | <b>796.048</b> | <b>100.00</b>      | <b>100.00</b>        |                |

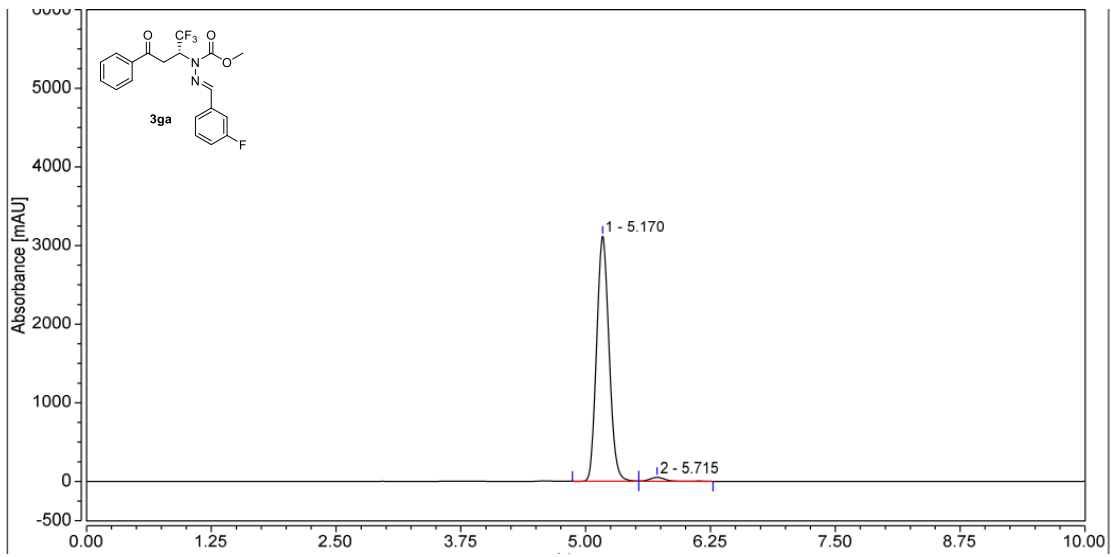

| Integration Results |           |                       |                 |                 |                    |                      |                |
|---------------------|-----------|-----------------------|-----------------|-----------------|--------------------|----------------------|----------------|
| No.                 | Peak Name | Retention Time<br>min | Area<br>mAU*min | Height<br>mAU   | Relative Area<br>% | Relative Height<br>% | Amount<br>n.a. |
| 1                   |           | 5.170                 | 449.767         | 3118.352        | 97.99              | 98.40                | n.a.           |
| 2                   |           | 5.715                 | 9.246           | 50.769          | 2.01               | 1.60                 | n.a.           |
| <b>Total:</b>       |           |                       | <b>459.013</b>  | <b>3169.121</b> | <b>100.00</b>      | <b>100.00</b>        |                |

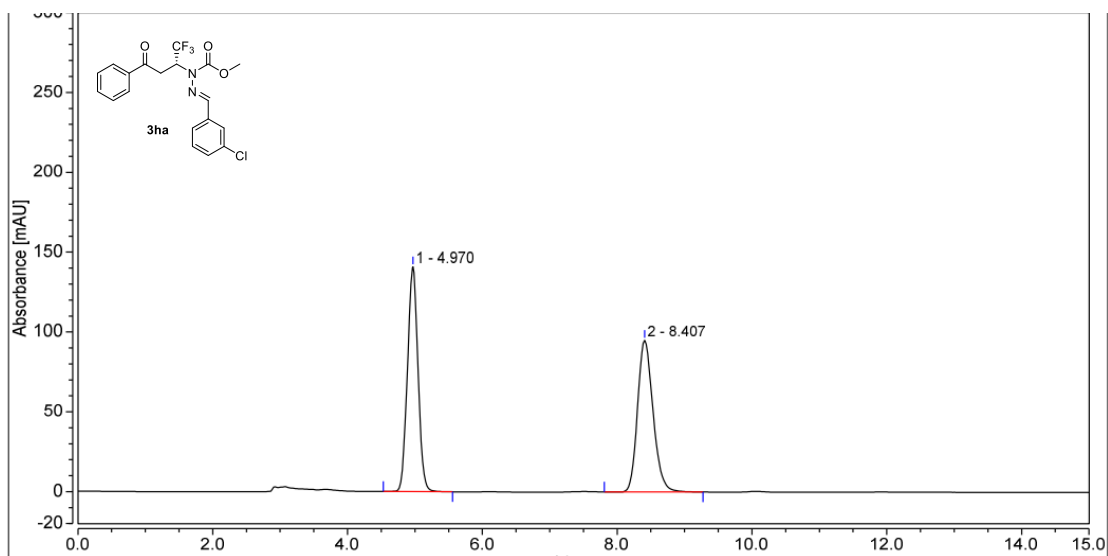

| Integration Results |           |                    |               |                |                 |                   |        |
|---------------------|-----------|--------------------|---------------|----------------|-----------------|-------------------|--------|
| No.                 | Peak Name | Retention Time min | Area mAU*min  | Height mAU     | Relative Area % | Relative Height % | Amount |
| 1                   |           | 4.970              | 25.546        | 140.704        | 50.23           | 59.71             | n.a.   |
| 2                   |           | 8.407              | 25.316        | 94.948         | 49.77           | 40.29             | n.a.   |
| <b>Total:</b>       |           |                    | <b>50.862</b> | <b>235.652</b> | <b>100.00</b>   | <b>100.00</b>     |        |

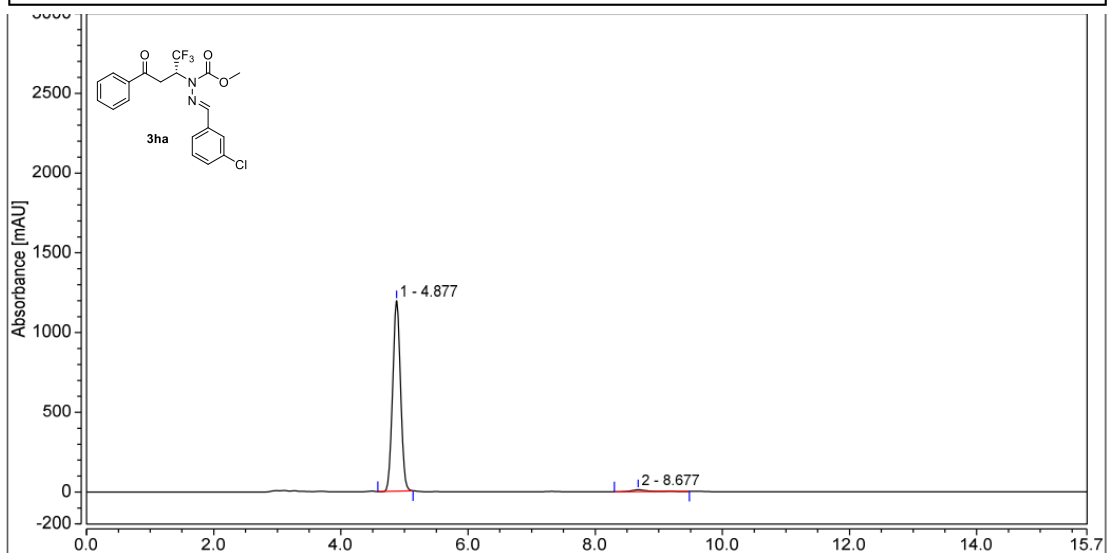

| Integration Results |           |                    |                |                 |                 |                   |        |
|---------------------|-----------|--------------------|----------------|-----------------|-----------------|-------------------|--------|
| No.                 | Peak Name | Retention Time min | Area mAU*min   | Height mAU      | Relative Area % | Relative Height % | Amount |
| 1                   |           | 4.877              | 170.926        | 1194.219        | 98.07           | 99.05             | n.a.   |
| 2                   |           | 8.677              | 3.359          | 11.472          | 1.93            | 0.95              | n.a.   |
| <b>Total:</b>       |           |                    | <b>174.285</b> | <b>1205.691</b> | <b>100.00</b>   | <b>100.00</b>     |        |

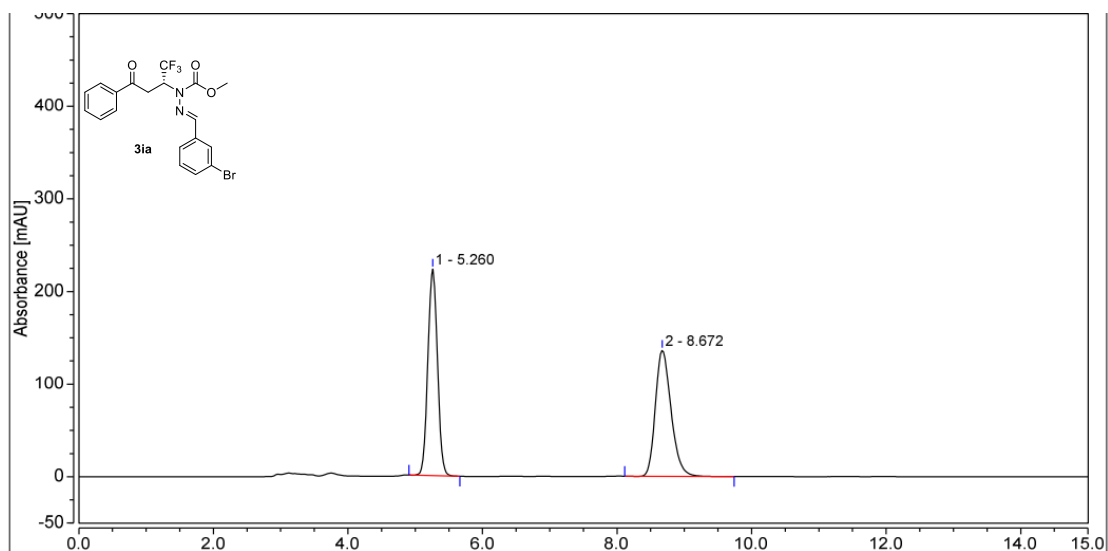

| Integration Results |           |                    |               |                |                 |                   |        |
|---------------------|-----------|--------------------|---------------|----------------|-----------------|-------------------|--------|
| No.                 | Peak Name | Retention Time min | Area mAU*min  | Height mAU     | Relative Area % | Relative Height % | Amount |
| 1                   |           | 5.260              | 36.736        | 222.889        | 50.02           | 62.09             | n.a.   |
| 2                   |           | 8.672              | 36.708        | 136.073        | 49.98           | 37.91             | n.a.   |
| <b>Total:</b>       |           |                    | <b>73.444</b> | <b>358.962</b> | <b>100.00</b>   | <b>100.00</b>     |        |

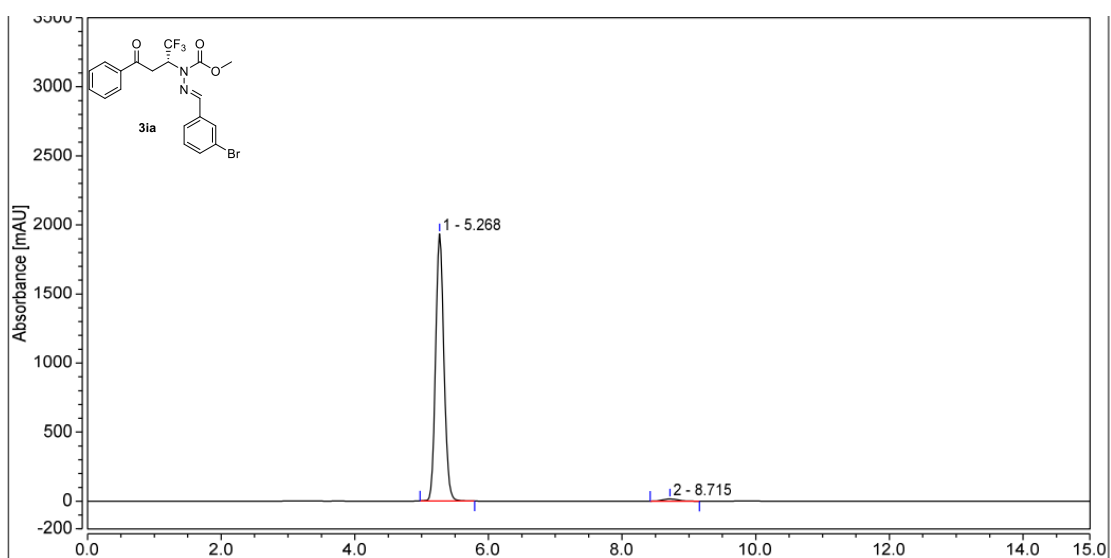

| Integration Results |           |                    |                |                 |                 |                   |        |
|---------------------|-----------|--------------------|----------------|-----------------|-----------------|-------------------|--------|
| No.                 | Peak Name | Retention Time min | Area mAU*min   | Height mAU      | Relative Area % | Relative Height % | Amount |
| 1                   |           | 5.268              | 278.883        | 1933.491        | 98.55           | 99.20             | n.a.   |
| 2                   |           | 8.715              | 4.101          | 15.506          | 1.45            | 0.80              | n.a.   |
| <b>Total:</b>       |           |                    | <b>282.984</b> | <b>1948.996</b> | <b>100.00</b>   | <b>100.00</b>     |        |



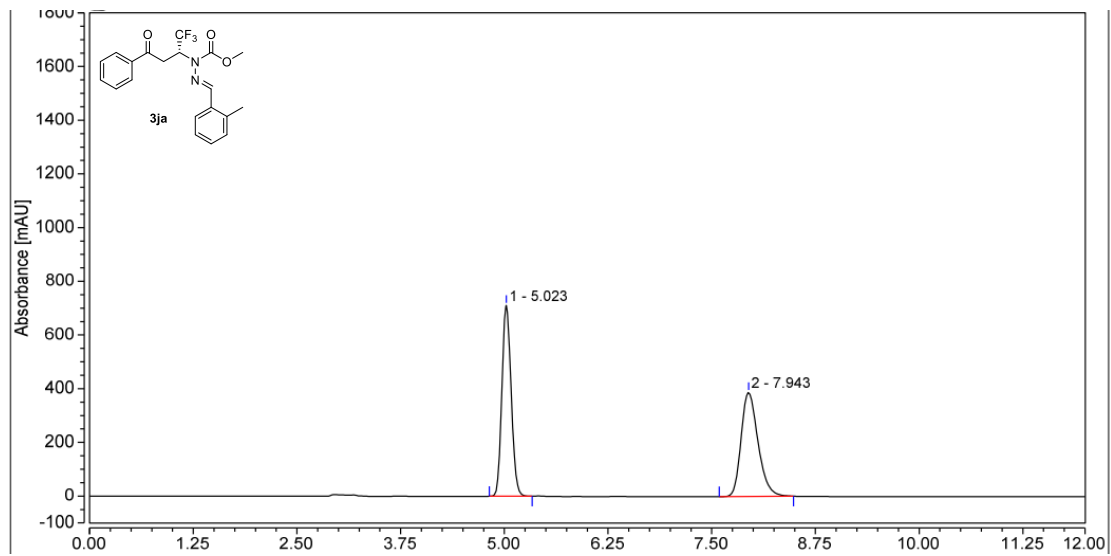

#### Integration Results

| No.           | Peak Name | Retention Time<br>min | Area<br>mAU*min | Height<br>mAU   | Relative Area<br>% | Relative Height<br>% | Amount<br>n.a. |
|---------------|-----------|-----------------------|-----------------|-----------------|--------------------|----------------------|----------------|
| 1             |           | 5.023                 | 91.567          | 710.554         | 50.02              | 64.73                | n.a.           |
| 2             |           | 7.943                 | 91.478          | 387.190         | 49.98              | 35.27                | n.a.           |
| <b>Total:</b> |           |                       | <b>183.045</b>  | <b>1097.744</b> | <b>100.00</b>      | <b>100.00</b>        |                |

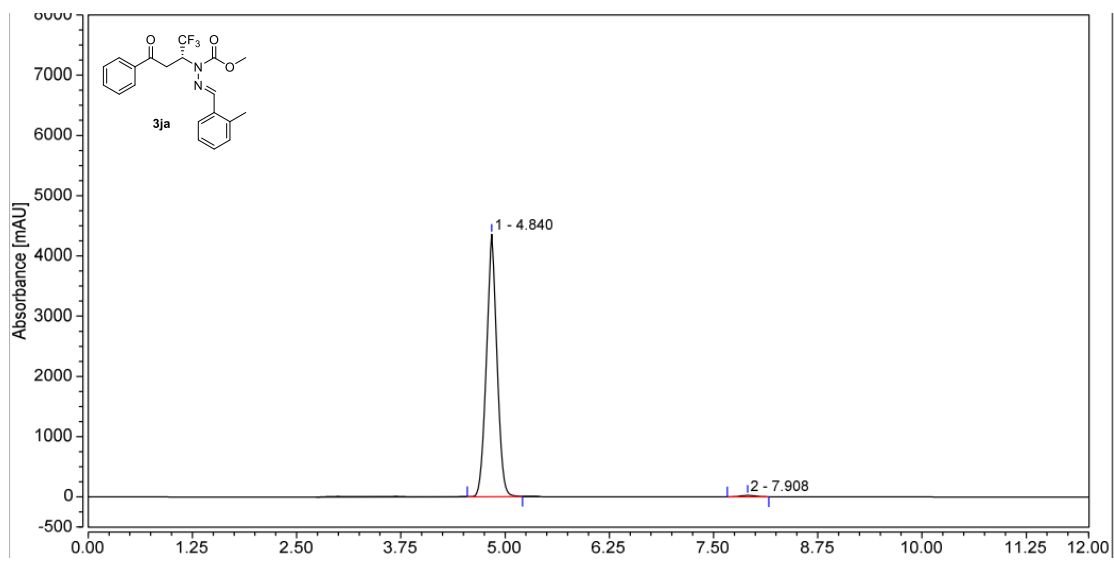

#### Integration Results

| No.           | Peak Name | Retention Time<br>min | Area<br>mAU*min | Height<br>mAU   | Relative Area<br>% | Relative Height<br>% | Amount<br>n.a. |
|---------------|-----------|-----------------------|-----------------|-----------------|--------------------|----------------------|----------------|
| 1             |           | 4.840                 | 634.168         | 4356.731        | 99.21              | 99.47                | n.a.           |
| 2             |           | 7.908                 | 5.051           | 23.380          | 0.79               | 0.53                 | n.a.           |
| <b>Total:</b> |           |                       | <b>639.218</b>  | <b>4380.111</b> | <b>100.00</b>      | <b>100.00</b>        |                |

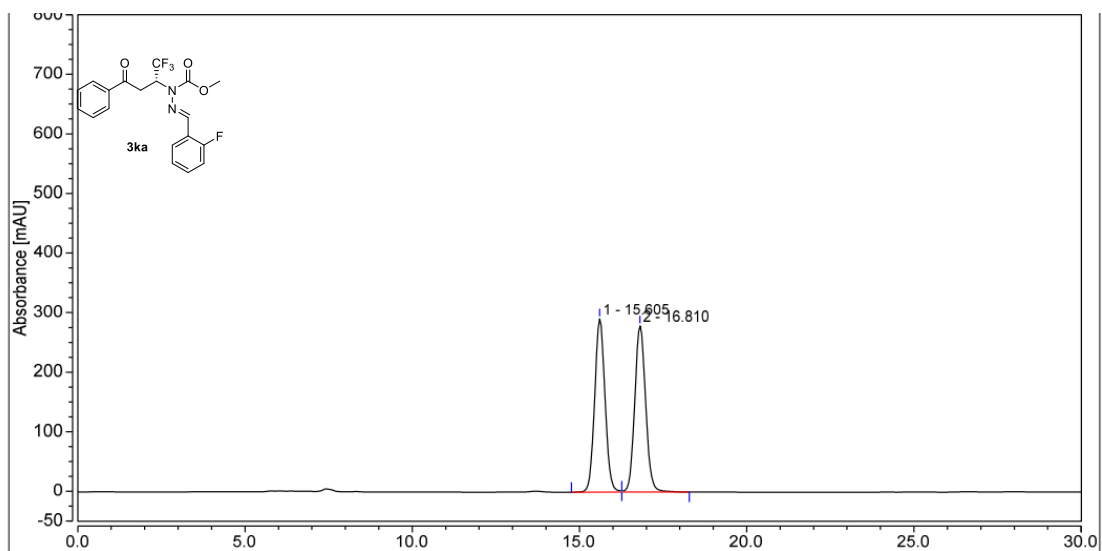

| Integration Results |           |                    |                |                |                 |                   |             |
|---------------------|-----------|--------------------|----------------|----------------|-----------------|-------------------|-------------|
| No.                 | Peak Name | Retention Time min | Area mAU*min   | Height mAU     | Relative Area % | Relative Height % | Amount n.a. |
| 1                   |           | 15.605             | 104.864        | 291.091        | 49.73           | 51.04             | n.a.        |
| 2                   |           | 16.810             | 106.016        | 279.229        | 50.27           | 48.96             | n.a.        |
| <b>Total:</b>       |           |                    | <b>210.880</b> | <b>570.320</b> | <b>100.00</b>   | <b>100.00</b>     |             |

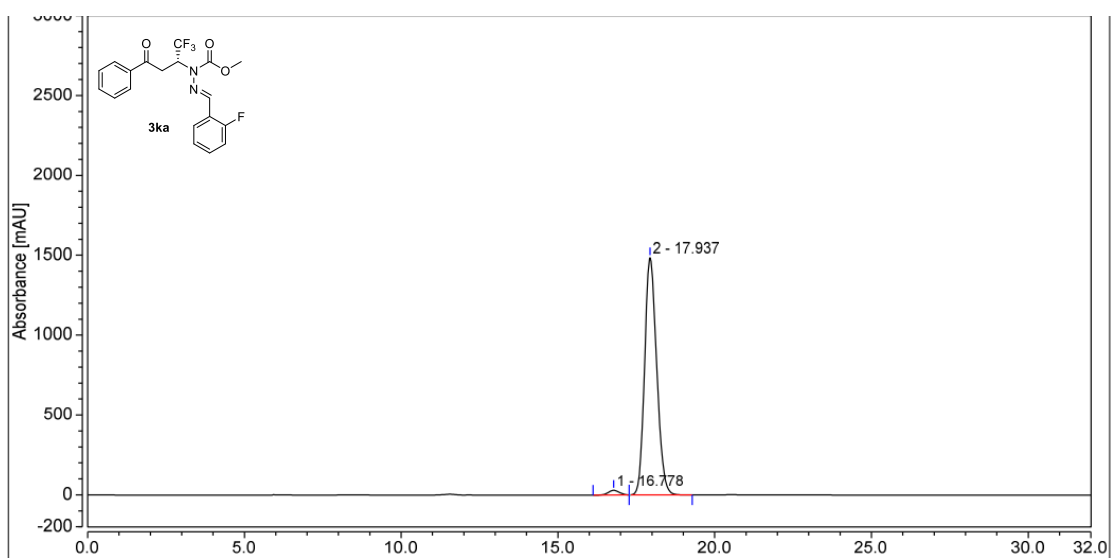

| Integration Results |           |                    |                |                 |                 |                   |             |
|---------------------|-----------|--------------------|----------------|-----------------|-----------------|-------------------|-------------|
| No.                 | Peak Name | Retention Time min | Area mAU*min   | Height mAU      | Relative Area % | Relative Height % | Amount n.a. |
| 1                   |           | 16.778             | 12.113         | 29.355          | 1.80            | 1.94              | n.a.        |
| 2                   |           | 17.937             | 662.532        | 1485.587        | 98.20           | 98.06             | n.a.        |
| <b>Total:</b>       |           |                    | <b>674.645</b> | <b>1514.943</b> | <b>100.00</b>   | <b>100.00</b>     |             |

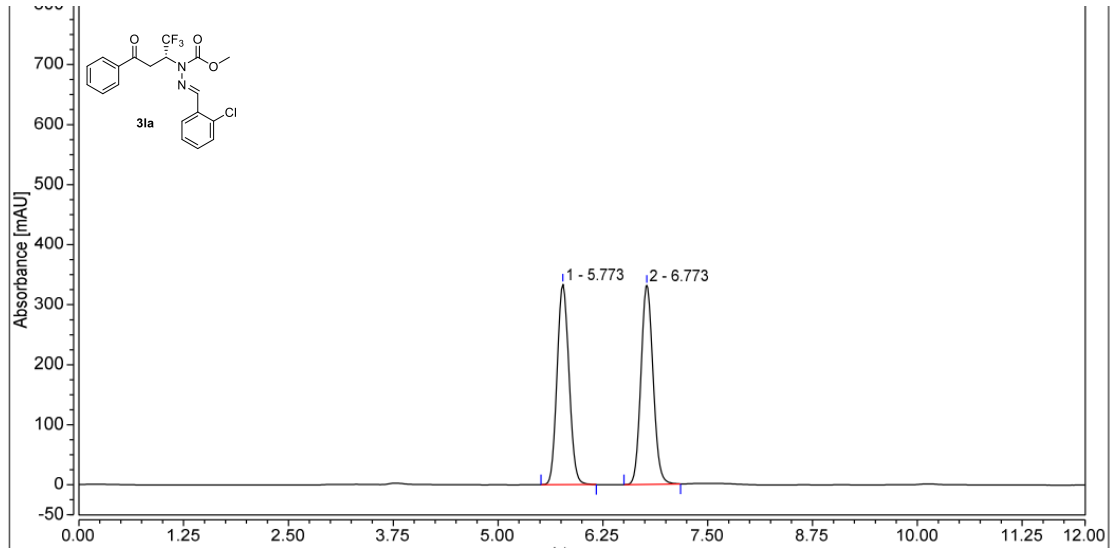

#### Integration Results

| No.           | Peak Name | Retention Time<br>min | Area<br>mAU*min | Height<br>mAU  | Relative Area<br>% | Relative Height<br>% | Amount<br>n.a. |
|---------------|-----------|-----------------------|-----------------|----------------|--------------------|----------------------|----------------|
| 1             |           | 5.773                 | 54.873          | 334.295        | 49.80              | 50.20                | n.a.           |
| 2             |           | 6.773                 | 55.321          | 331.691        | 50.20              | 49.80                | n.a.           |
| <b>Total:</b> |           |                       | <b>110.194</b>  | <b>665.986</b> | <b>100.00</b>      | <b>100.00</b>        |                |

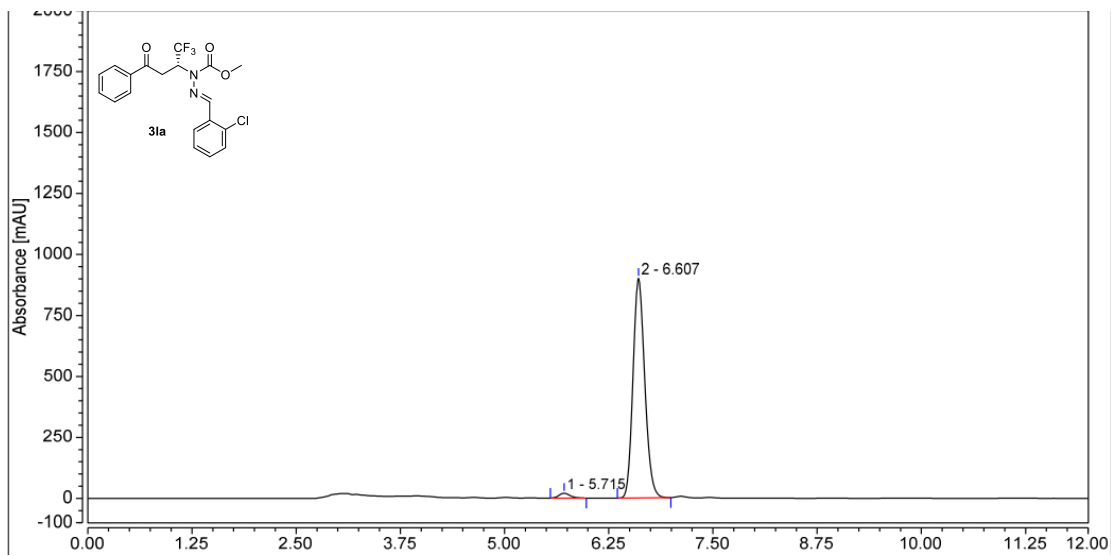

#### Integration Results

| No.           | Peak Name | Retention Time<br>min | Area<br>mAU*min | Height<br>mAU  | Relative Area<br>% | Relative Height<br>% | Amount<br>n.a. |
|---------------|-----------|-----------------------|-----------------|----------------|--------------------|----------------------|----------------|
| 1             |           | 5.715                 | 3.098           | 20.016         | 2.06               | 2.17                 | n.a.           |
| 2             |           | 6.607                 | 147.429         | 900.520        | 97.94              | 97.83                | n.a.           |
| <b>Total:</b> |           |                       | <b>150.527</b>  | <b>920.536</b> | <b>100.00</b>      | <b>100.00</b>        |                |

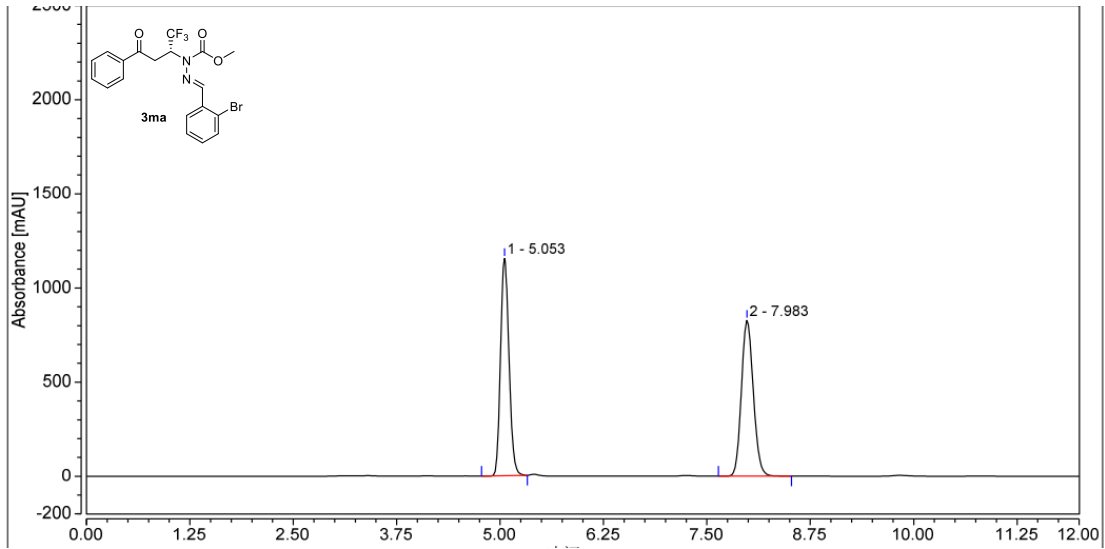

**Integration Results**

| No.           | Peak Name | Retention Time min | Area mAU*min   | Height mAU      | Relative Area % | Relative Height % | Amount |
|---------------|-----------|--------------------|----------------|-----------------|-----------------|-------------------|--------|
| 1             |           | 5.053              | 136.262        | 1154.533        | 49.69           | 58.22             | n.a.   |
| 2             |           | 7.983              | 137.973        | 828.489         | 50.31           | 41.78             | n.a.   |
| <b>Total:</b> |           |                    | <b>274.236</b> | <b>1983.022</b> | <b>100.00</b>   | <b>100.00</b>     |        |

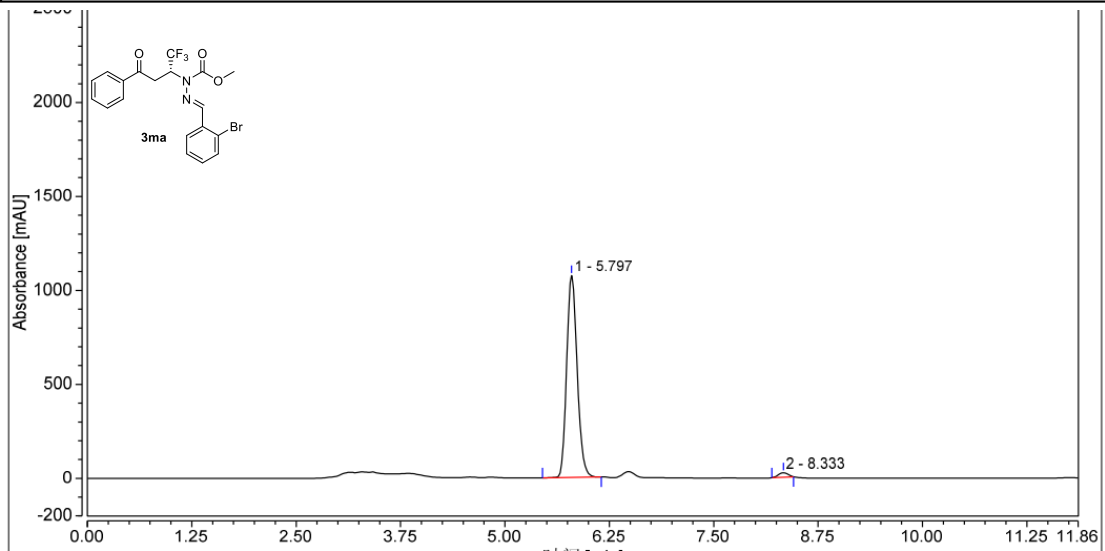

**Integration Results**

| No.           | Peak Name | Retention Time min | Area mAU*min   | Height mAU      | Relative Area % | Relative Height % | Amount |
|---------------|-----------|--------------------|----------------|-----------------|-----------------|-------------------|--------|
| 1             |           | 5.797              | 157.219        | 1073.540        | 98.00           | 97.82             | n.a.   |
| 2             |           | 8.333              | 3.216          | 23.879          | 2.00            | 2.18              | n.a.   |
| <b>Total:</b> |           |                    | <b>160.436</b> | <b>1097.418</b> | <b>100.00</b>   | <b>100.00</b>     |        |

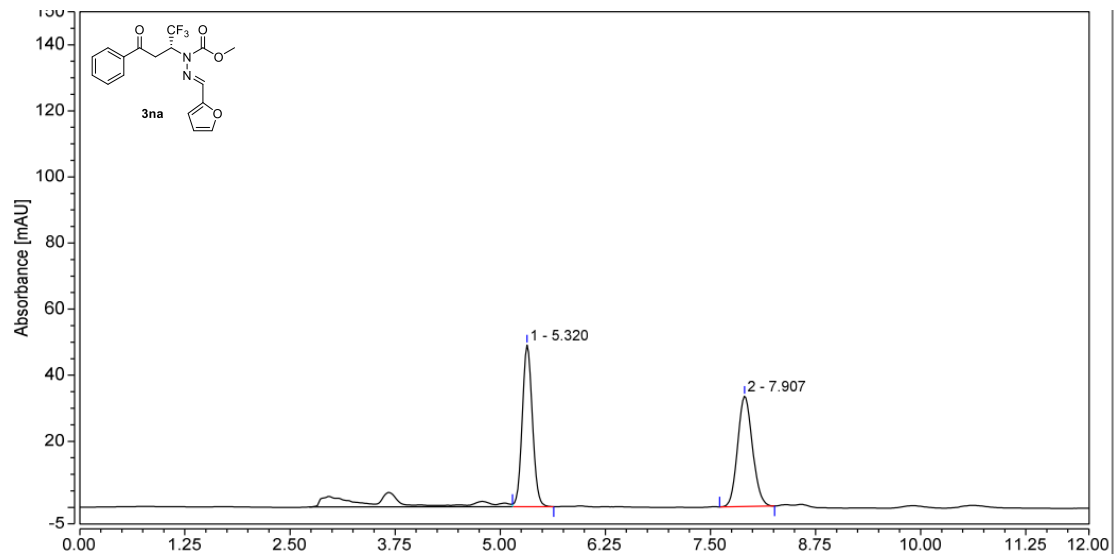

| Integration Results |           |                       |                 |               |                    |                      |                |
|---------------------|-----------|-----------------------|-----------------|---------------|--------------------|----------------------|----------------|
| No.                 | Peak Name | Retention Time<br>min | Area<br>mAU*min | Height<br>mAU | Relative Area<br>% | Relative Height<br>% | Amount<br>n.a. |
| 1                   |           | 5.320                 | 6.937           | 48.951        | 50.31              | 59.46                | n.a.           |
| 2                   |           | 7.907                 | 6.851           | 33.371        | 49.69              | 40.54                | n.a.           |
| <b>Total:</b>       |           |                       | <b>13.788</b>   | <b>82.322</b> | <b>100.00</b>      | <b>100.00</b>        |                |

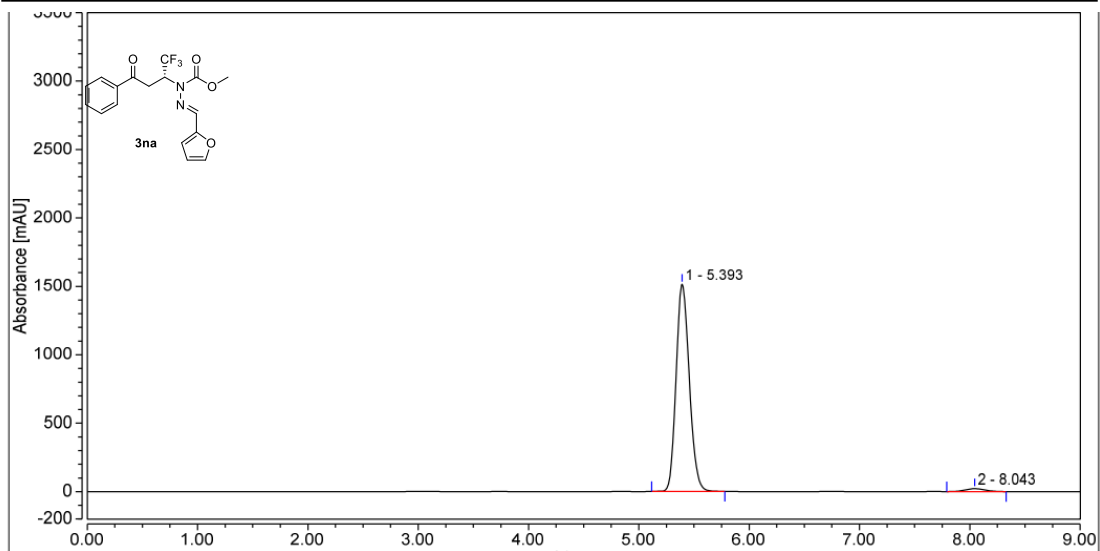

| Integration Results |           |                       |                 |                 |                    |                      |                |
|---------------------|-----------|-----------------------|-----------------|-----------------|--------------------|----------------------|----------------|
| No.                 | Peak Name | Retention Time<br>min | Area<br>mAU*min | Height<br>mAU   | Relative Area<br>% | Relative Height<br>% | Amount<br>n.a. |
| 1                   |           | 5.393                 | 210.293         | 1514.539        | 97.96              | 98.61                | n.a.           |
| 2                   |           | 8.043                 | 4.383           | 21.416          | 2.04               | 1.39                 | n.a.           |
| <b>Total:</b>       |           |                       | <b>214.676</b>  | <b>1535.955</b> | <b>100.00</b>      | <b>100.00</b>        |                |

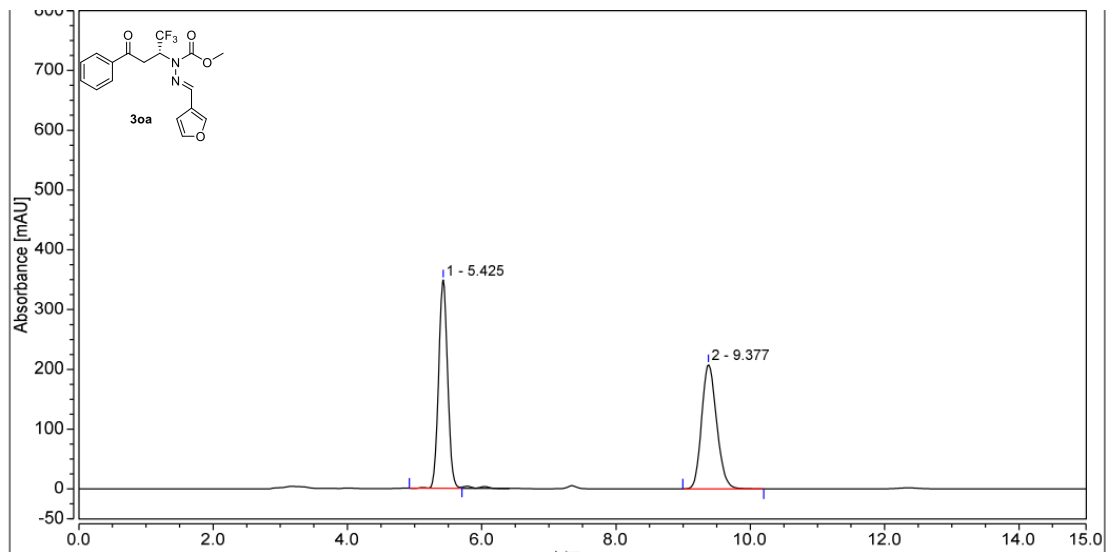

| Integration Results |           |                       |                 |                |                    |                      |                |
|---------------------|-----------|-----------------------|-----------------|----------------|--------------------|----------------------|----------------|
| No.                 | Peak Name | Retention Time<br>min | Area<br>mAU*min | Height<br>mAU  | Relative Area<br>% | Relative Height<br>% | Amount<br>n.a. |
| 1                   |           | 5.425                 | 54.109          | 348.470        | 49.99              | 62.63                | n.a.           |
| 2                   |           | 9.377                 | 54.121          | 207.884        | 50.01              | 37.37                | n.a.           |
| <b>Total:</b>       |           |                       | <b>108.230</b>  | <b>556.354</b> | <b>100.00</b>      | <b>100.00</b>        |                |

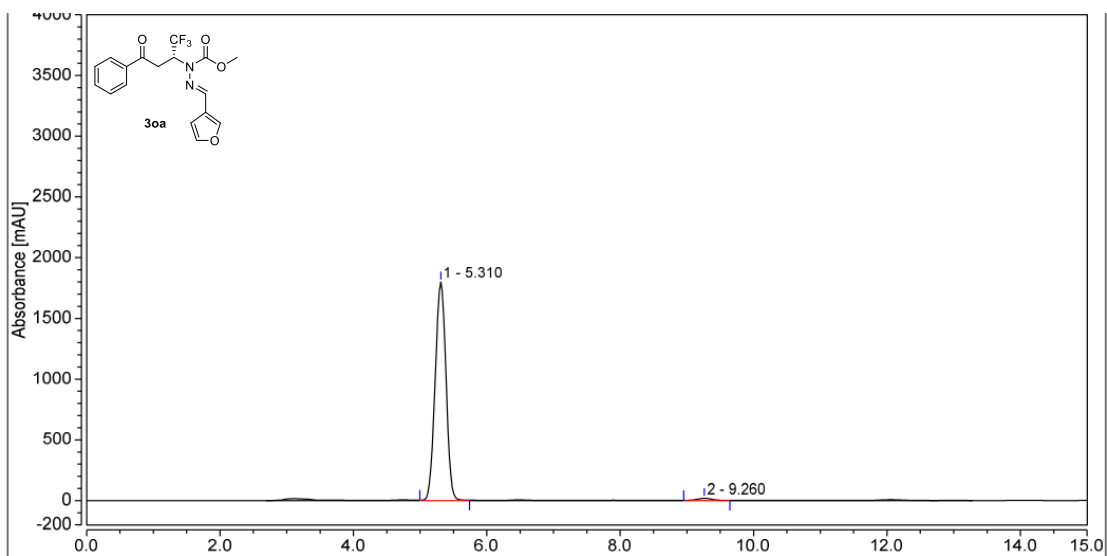

| Integration Results |           |                       |                 |                 |                    |                      |                |
|---------------------|-----------|-----------------------|-----------------|-----------------|--------------------|----------------------|----------------|
| No.                 | Peak Name | Retention Time<br>min | Area<br>mAU*min | Height<br>mAU   | Relative Area<br>% | Relative Height<br>% | Amount<br>n.a. |
| 1                   |           | 5.310                 | 338.807         | 1799.607        | 98.52              | 99.00                | n.a.           |
| 2                   |           | 9.260                 | 5.101           | 18.253          | 1.48               | 1.00                 | n.a.           |
| <b>Total:</b>       |           |                       | <b>343.908</b>  | <b>1817.860</b> | <b>100.00</b>      | <b>100.00</b>        |                |

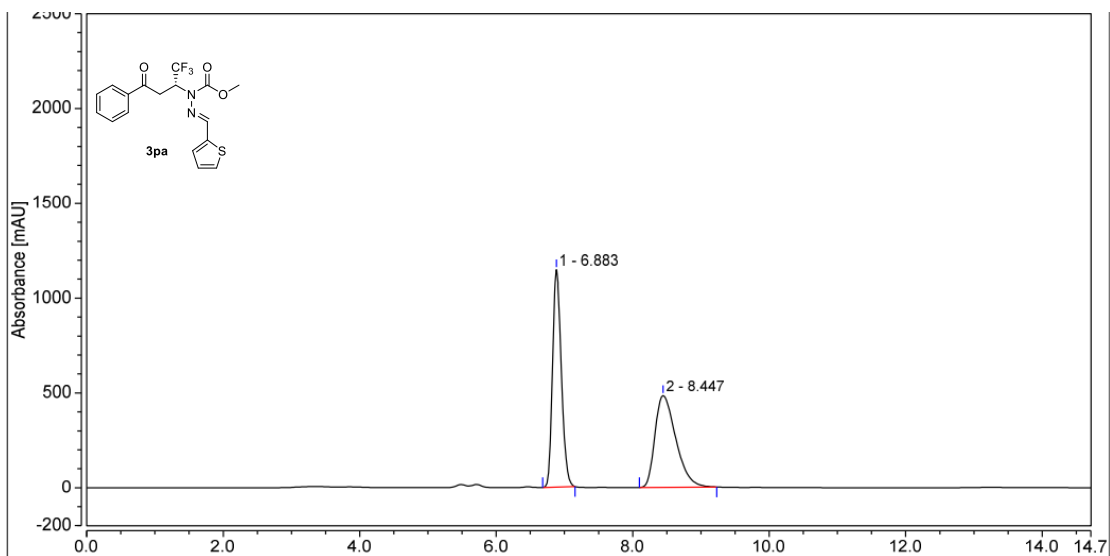

| Integration Results |           |                       |                 |                 |                    |                      |                |
|---------------------|-----------|-----------------------|-----------------|-----------------|--------------------|----------------------|----------------|
| No.                 | Peak Name | Retention Time<br>min | Area<br>mAU*min | Height<br>mAU   | Relative Area<br>% | Relative Height<br>% | Amount<br>n.a. |
| 1                   |           | 6.883                 | 170.554         | 1147.145        | 49.87              | 70.29                | n.a.           |
| 2                   |           | 8.447                 | 171.413         | 484.958         | 50.13              | 29.71                | n.a.           |
| <b>Total:</b>       |           |                       | <b>341.967</b>  | <b>1632.102</b> | <b>100.00</b>      | <b>100.00</b>        |                |

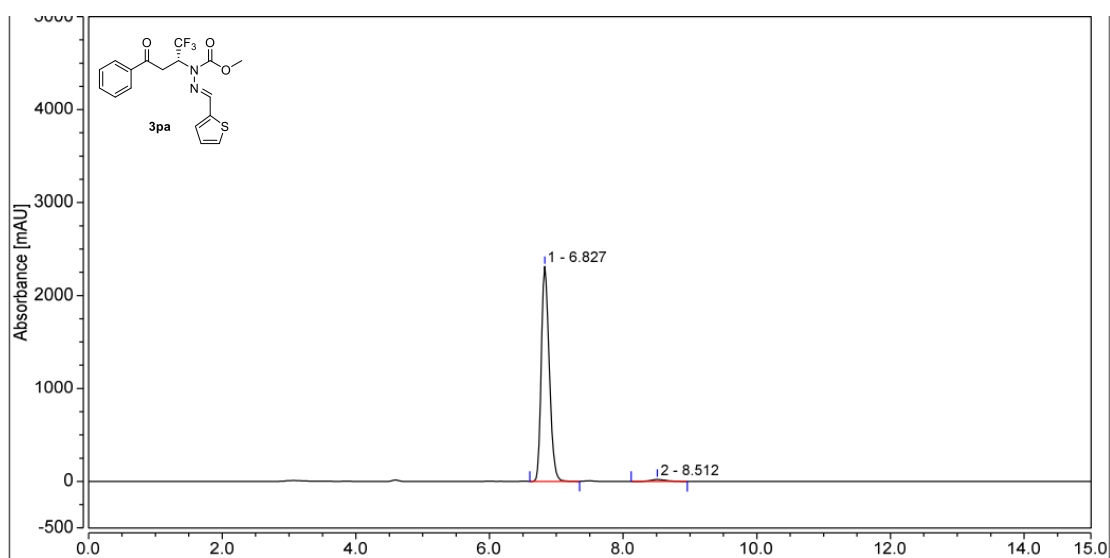

| Integration Results |           |                       |                 |                 |                    |                      |                |
|---------------------|-----------|-----------------------|-----------------|-----------------|--------------------|----------------------|----------------|
| No.                 | Peak Name | Retention Time<br>min | Area<br>mAU*min | Height<br>mAU   | Relative Area<br>% | Relative Height<br>% | Amount<br>n.a. |
| 1                   |           | 6.827                 | 319.541         | 2311.499        | 98.32              | 99.12                | n.a.           |
| 2                   |           | 8.512                 | 5.466           | 20.448          | 1.68               | 0.88                 | n.a.           |
| <b>Total:</b>       |           |                       | <b>325.007</b>  | <b>2331.947</b> | <b>100.00</b>      | <b>100.00</b>        |                |

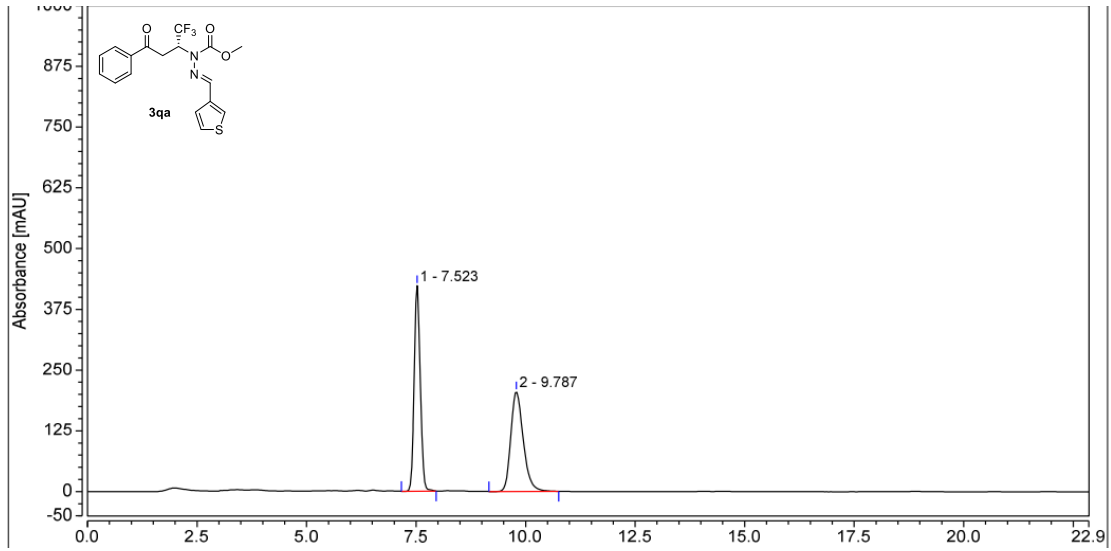

| Integration Results |           |                    |                |                |                 |                   |        |
|---------------------|-----------|--------------------|----------------|----------------|-----------------|-------------------|--------|
| No.                 | Peak Name | Retention Time min | Area mAU*min   | Height mAU     | Relative Area % | Relative Height % | Amount |
| 1                   |           | 7.523              | 68.223         | 423.136        | 50.20           | 67.33             | n.a.   |
| 2                   |           | 9.787              | 67.673         | 205.283        | 49.80           | 32.67             | n.a.   |
| <b>Total:</b>       |           |                    | <b>135.896</b> | <b>628.419</b> | <b>100.00</b>   | <b>100.00</b>     |        |

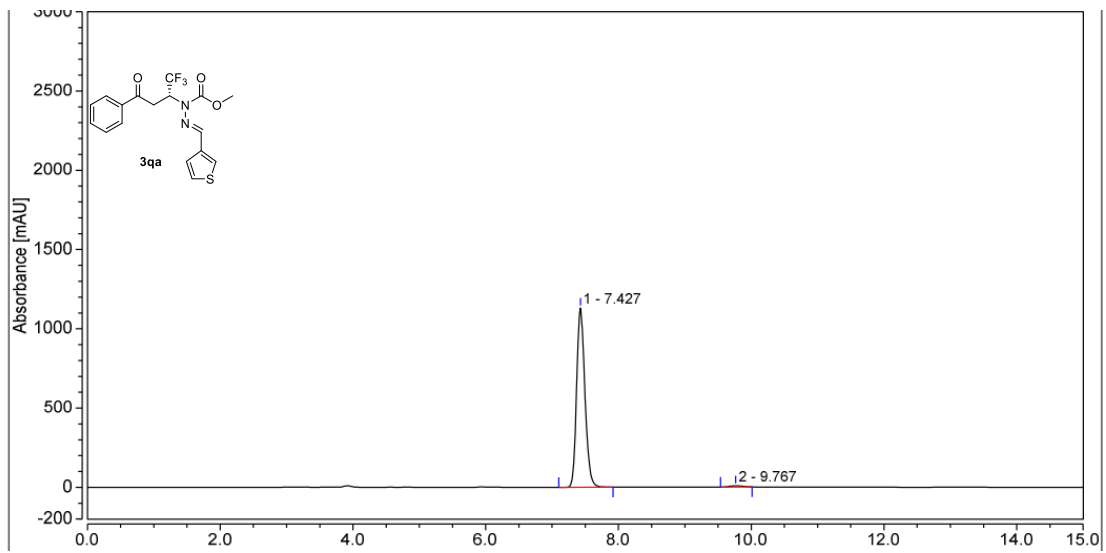

| Integration Results |           |                    |                |                 |                 |                   |        |
|---------------------|-----------|--------------------|----------------|-----------------|-----------------|-------------------|--------|
| No.                 | Peak Name | Retention Time min | Area mAU*min   | Height mAU      | Relative Area % | Relative Height % | Amount |
| 1                   |           | 7.427              | 164.256        | 1131.054        | 98.90           | 99.33             | n.a.   |
| 2                   |           | 9.767              | 1.822          | 7.681           | 1.10            | 0.67              | n.a.   |
| <b>Total:</b>       |           |                    | <b>166.077</b> | <b>1138.735</b> | <b>100.00</b>   | <b>100.00</b>     |        |



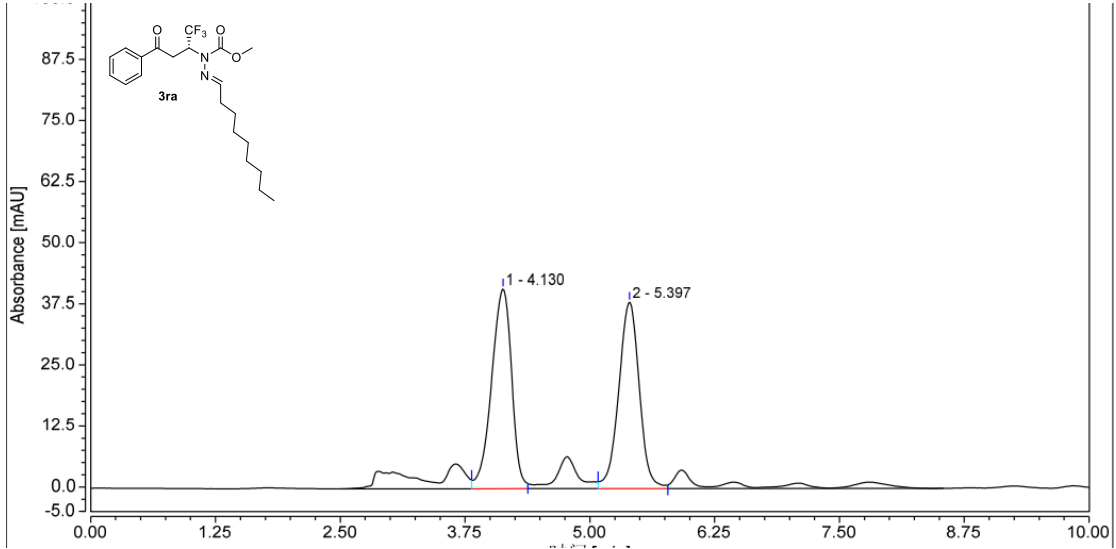

**Integration Results**

| No.           | Peak Name | Retention Time<br>min | Area<br>mAU*min | Height<br>mAU | Relative Area<br>% | Relative Height<br>% | Amount<br>n.a. |
|---------------|-----------|-----------------------|-----------------|---------------|--------------------|----------------------|----------------|
| 1             |           | 4.130                 | 9.531           | 40.892        | 51.10              | 51.72                | n.a.           |
| 2             |           | 5.397                 | 9.119           | 38.173        | 48.90              | 48.28                | n.a.           |
| <b>Total:</b> |           |                       | <b>18.650</b>   | <b>79.065</b> | <b>100.00</b>      | <b>100.00</b>        |                |

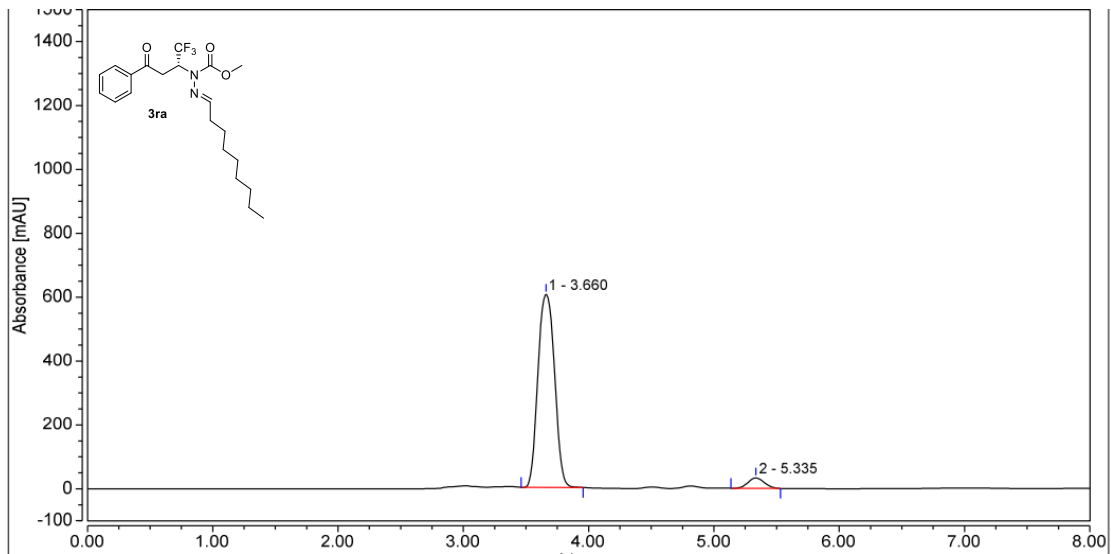

**Integration Results**

| No.           | Peak Name | Retention Time<br>min | Area<br>mAU*min | Height<br>mAU  | Relative Area<br>% | Relative Height<br>% | Amount<br>n.a. |
|---------------|-----------|-----------------------|-----------------|----------------|--------------------|----------------------|----------------|
| 1             |           | 3.660                 | 93.161          | 605.274        | 95.01              | 94.90                | n.a.           |
| 2             |           | 5.335                 | 4.894           | 32.529         | 4.99               | 5.10                 | n.a.           |
| <b>Total:</b> |           |                       | <b>98.055</b>   | <b>637.804</b> | <b>100.00</b>      | <b>100.00</b>        |                |

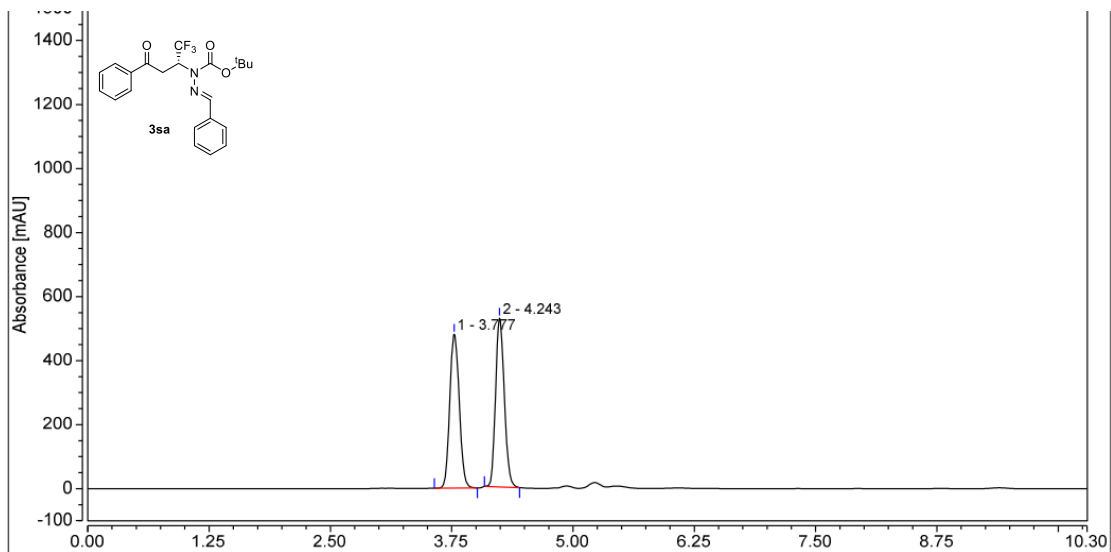

| Integration Results |           |                    |                |                 |                 |                   |        |
|---------------------|-----------|--------------------|----------------|-----------------|-----------------|-------------------|--------|
| No.                 | Peak Name | Retention Time min | Area mAU*min   | Height mAU      | Relative Area % | Relative Height % | Amount |
| 1                   |           | 3.777              | 54.995         | 481.340         | 50.13           | 47.72             | n.a.   |
| 2                   |           | 4.243              | 54.717         | 527.415         | 49.87           | 52.28             | n.a.   |
| <b>Total:</b>       |           |                    | <b>109.713</b> | <b>1008.755</b> | <b>100.00</b>   | <b>100.00</b>     |        |

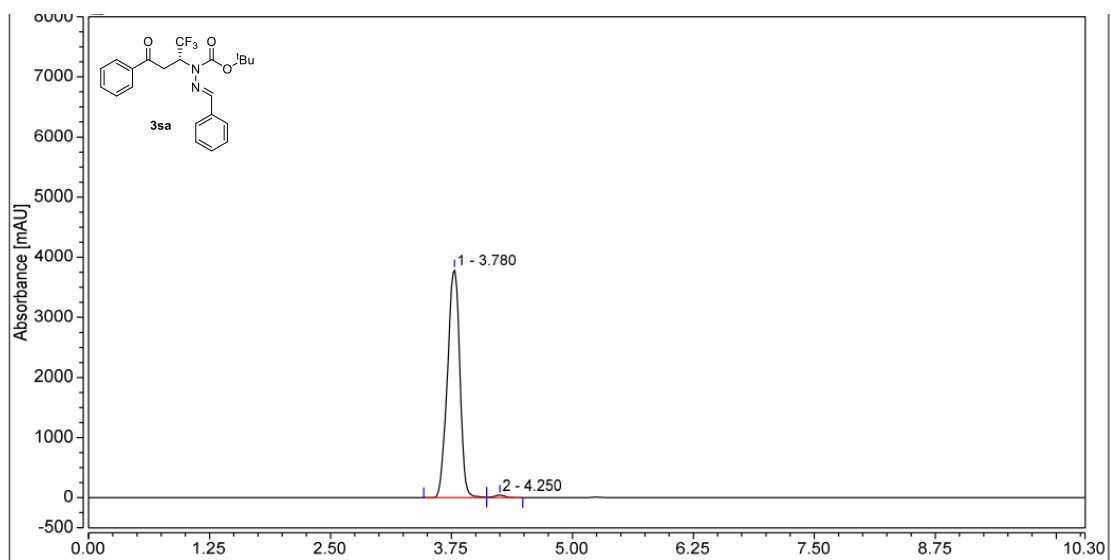

| Integration Results |           |                    |                |                 |                 |                   |        |
|---------------------|-----------|--------------------|----------------|-----------------|-----------------|-------------------|--------|
| No.                 | Peak Name | Retention Time min | Area mAU*min   | Height mAU      | Relative Area % | Relative Height % | Amount |
| 1                   |           | 3.780              | 562.036        | 3790.156        | 99.04           | 98.90             | n.a.   |
| 2                   |           | 4.250              | 5.422          | 42.059          | 0.96            | 1.10              | n.a.   |
| <b>Total:</b>       |           |                    | <b>567.458</b> | <b>3832.214</b> | <b>100.00</b>   | <b>100.00</b>     |        |

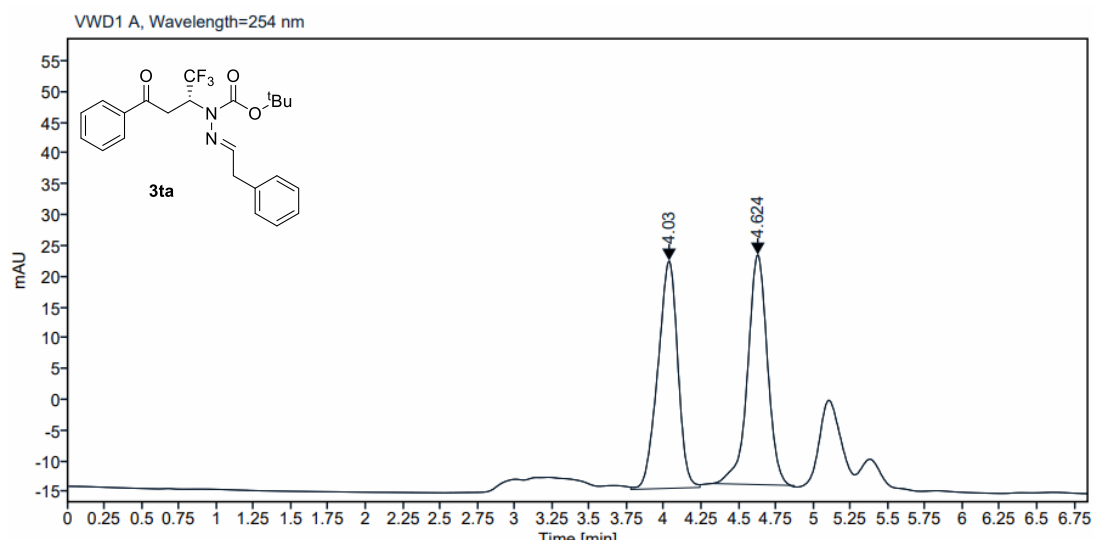

Signal: VWD1 A, Wavelength=254 nm

| RT [min] | Area     | Height  | Area%   |
|----------|----------|---------|---------|
| 4.030    | 343.2620 | 36.9901 | 49.9094 |
| 4.624    | 344.5086 | 37.3554 | 50.0906 |
| Sum      | 687.7706 |         |         |

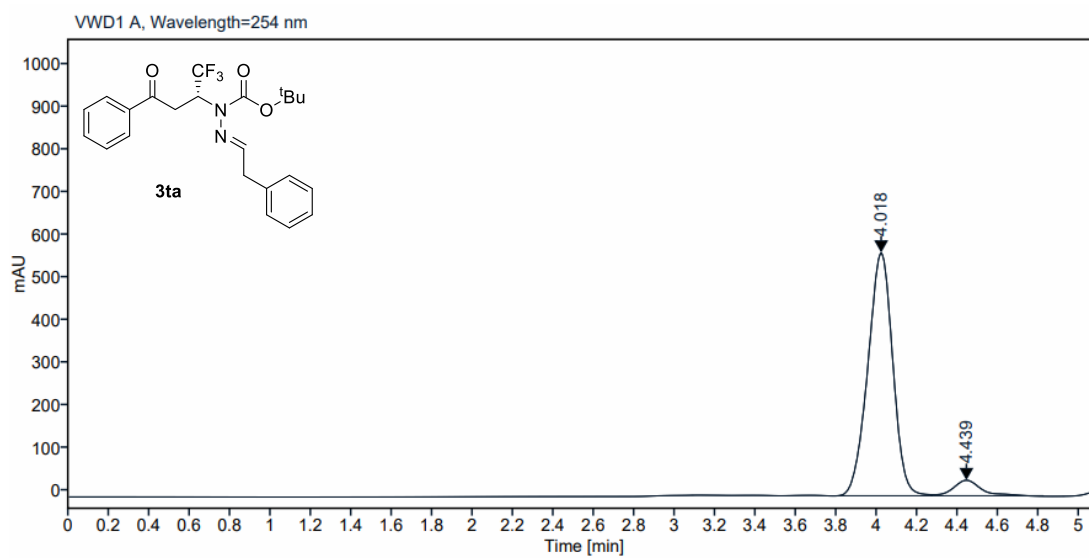

Signal: VWD1 A, Wavelength=254 nm

| RT [min] | Area      | Height   | Area%   |
|----------|-----------|----------|---------|
| 4.018    | 4886.3584 | 571.9642 | 93.4804 |
| 4.439    | 340.7892  | 36.3758  | 6.5196  |
| Sum      | 5227.1476 |          |         |

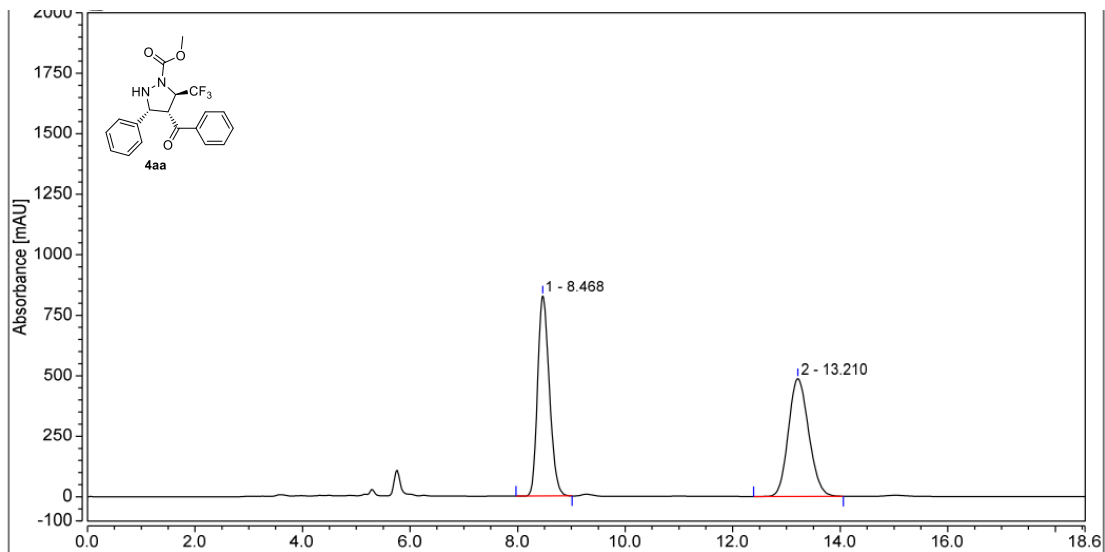

| Integration Results |           |                    |                |                 |                 |                   |             |
|---------------------|-----------|--------------------|----------------|-----------------|-----------------|-------------------|-------------|
| No.                 | Peak Name | Retention Time min | Area mAU*min   | Height mAU      | Relative Area % | Relative Height % | Amount n.a. |
| 1                   |           | 8.468              | 209.935        | 827.023         | 49.62           | 62.94             | n.a.        |
| 2                   |           | 13.210             | 213.139        | 486.875         | 50.38           | 37.06             | n.a.        |
| <b>Total:</b>       |           |                    | <b>423.074</b> | <b>1313.898</b> | <b>100.00</b>   | <b>100.00</b>     |             |

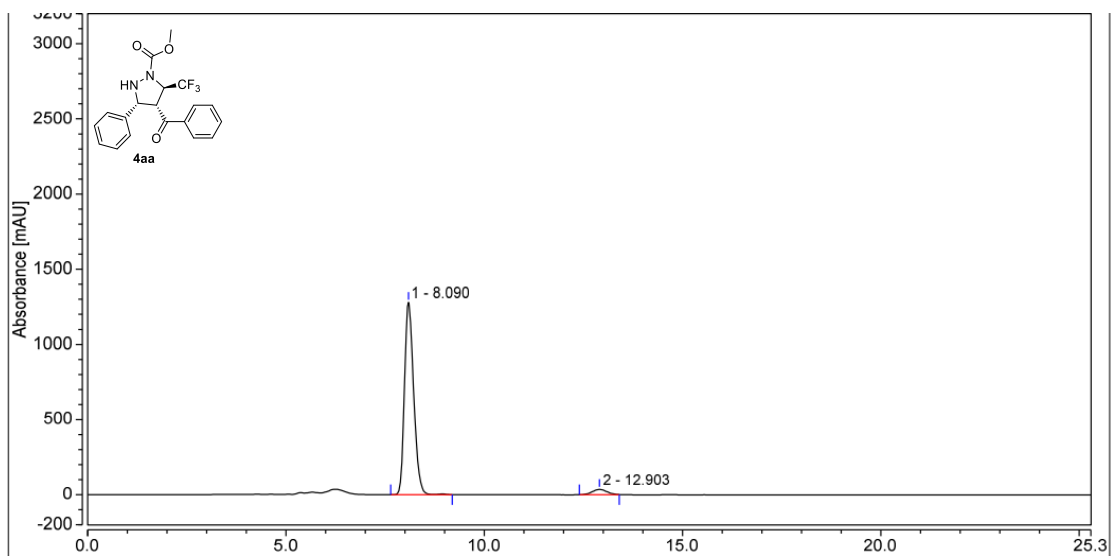

| Integration Results |           |                    |                |                 |                 |                   |             |
|---------------------|-----------|--------------------|----------------|-----------------|-----------------|-------------------|-------------|
| No.                 | Peak Name | Retention Time min | Area mAU*min   | Height mAU      | Relative Area % | Relative Height % | Amount n.a. |
| 1                   |           | 8.090              | 345.079        | 1280.025        | 95.82           | 97.34             | n.a.        |
| 2                   |           | 12.903             | 15.035         | 34.972          | 4.18            | 2.66              | n.a.        |
| <b>Total:</b>       |           |                    | <b>360.114</b> | <b>1314.996</b> | <b>100.00</b>   | <b>100.00</b>     |             |

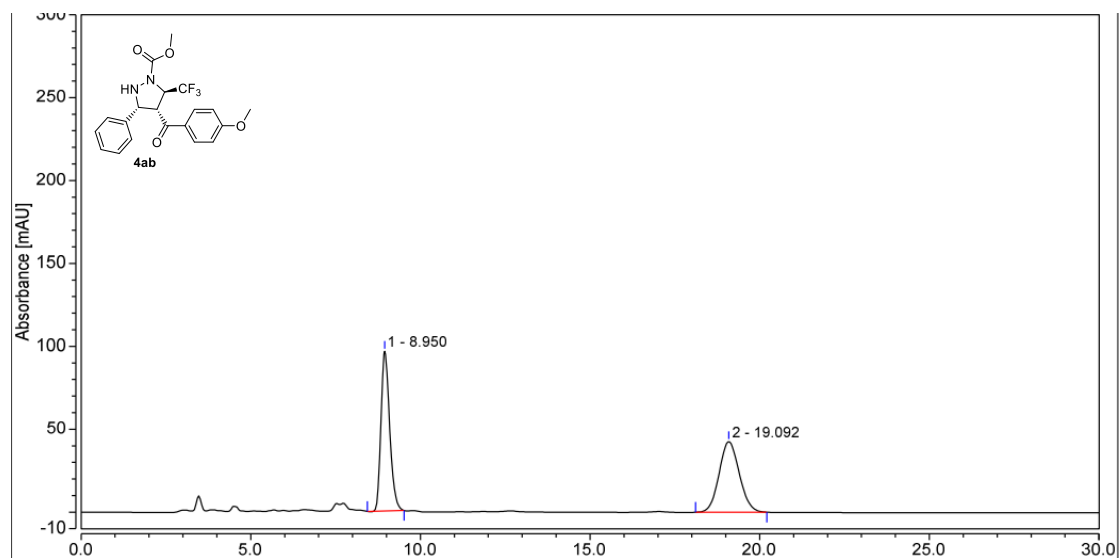

| Integration Results |           |                       |                 |                |                    |                      |                |
|---------------------|-----------|-----------------------|-----------------|----------------|--------------------|----------------------|----------------|
| No.                 | Peak Name | Retention Time<br>min | Area<br>mAU*min | Height<br>mAU  | Relative Area<br>% | Relative Height<br>% | Amount<br>n.a. |
| 1                   |           | 8.950                 | 28.585          | 96.259         | 49.33              | 69.32                | n.a.           |
| 2                   |           | 19.092                | 29.360          | 42.610         | 50.67              | 30.68                | n.a.           |
| <b>Total:</b>       |           |                       | <b>57.944</b>   | <b>138.869</b> | <b>100.00</b>      | <b>100.00</b>        |                |

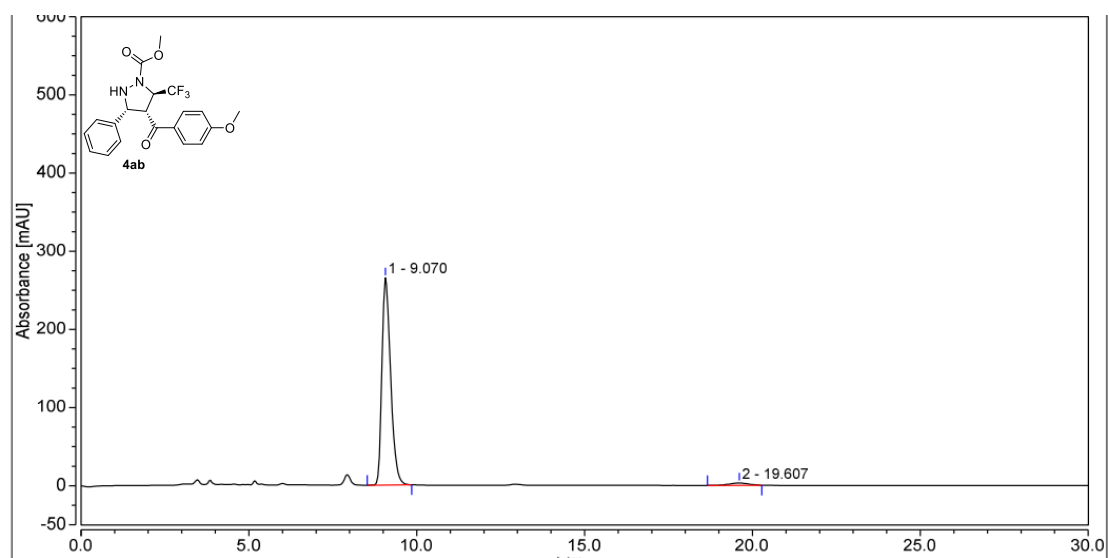

| Integration Results |           |                       |                 |                |                    |                      |                |
|---------------------|-----------|-----------------------|-----------------|----------------|--------------------|----------------------|----------------|
| No.                 | Peak Name | Retention Time<br>min | Area<br>mAU*min | Height<br>mAU  | Relative Area<br>% | Relative Height<br>% | Amount<br>n.a. |
| 1                   |           | 9.070                 | 79.893          | 265.126        | 97.63              | 98.92                | n.a.           |
| 2                   |           | 19.607                | 1.937           | 2.888          | 2.37               | 1.08                 | n.a.           |
| <b>Total:</b>       |           |                       | <b>81.830</b>   | <b>268.014</b> | <b>100.00</b>      | <b>100.00</b>        |                |

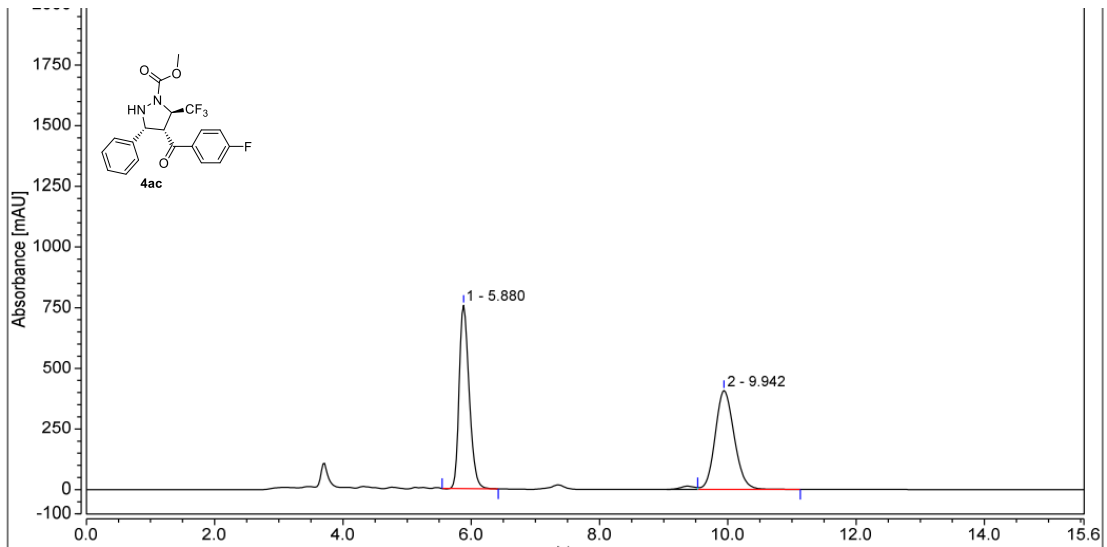

| Integration Results |           |                    |                |                 |                 |                   |        |
|---------------------|-----------|--------------------|----------------|-----------------|-----------------|-------------------|--------|
| No.                 | Peak Name | Retention Time min | Area mAU*min   | Height mAU      | Relative Area % | Relative Height % | Amount |
| 1                   |           | 5.880              | 136.381        | 756.255         | 49.41           | 64.96             | n.a.   |
| 2                   |           | 9.942              | 139.628        | 407.855         | 50.59           | 35.04             | n.a.   |
| <b>Total:</b>       |           |                    | <b>276.010</b> | <b>1164.109</b> | <b>100.00</b>   | <b>100.00</b>     |        |

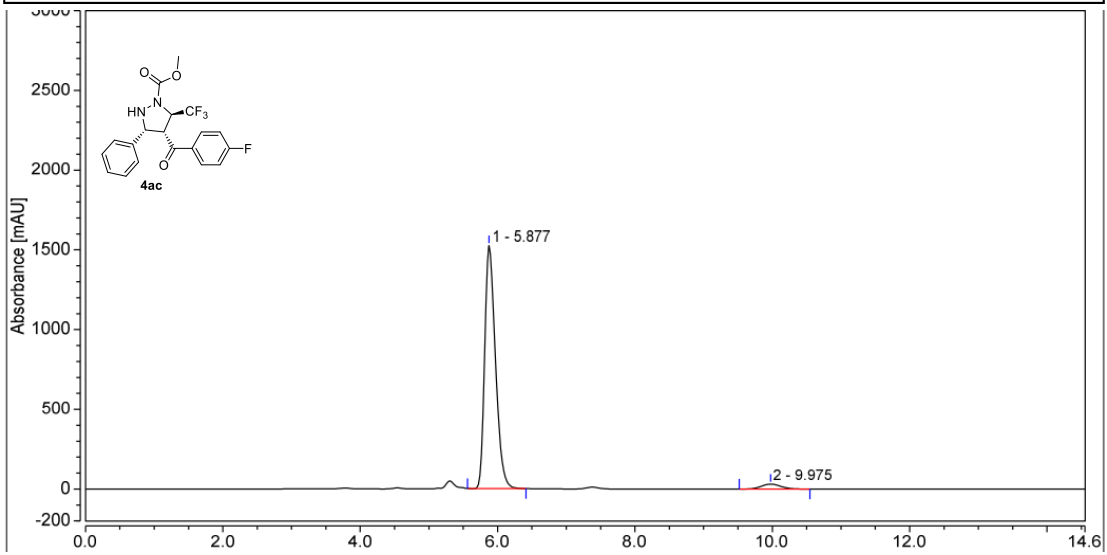

| Integration Results |           |                    |                |                 |                 |                   |        |
|---------------------|-----------|--------------------|----------------|-----------------|-----------------|-------------------|--------|
| No.                 | Peak Name | Retention Time min | Area mAU*min   | Height mAU      | Relative Area % | Relative Height % | Amount |
| 1                   |           | 5.877              | 277.294        | 1523.207        | 96.42           | 98.03             | n.a.   |
| 2                   |           | 9.975              | 10.307         | 30.677          | 3.58            | 1.97              | n.a.   |
| <b>Total:</b>       |           |                    | <b>287.601</b> | <b>1553.884</b> | <b>100.00</b>   | <b>100.00</b>     |        |

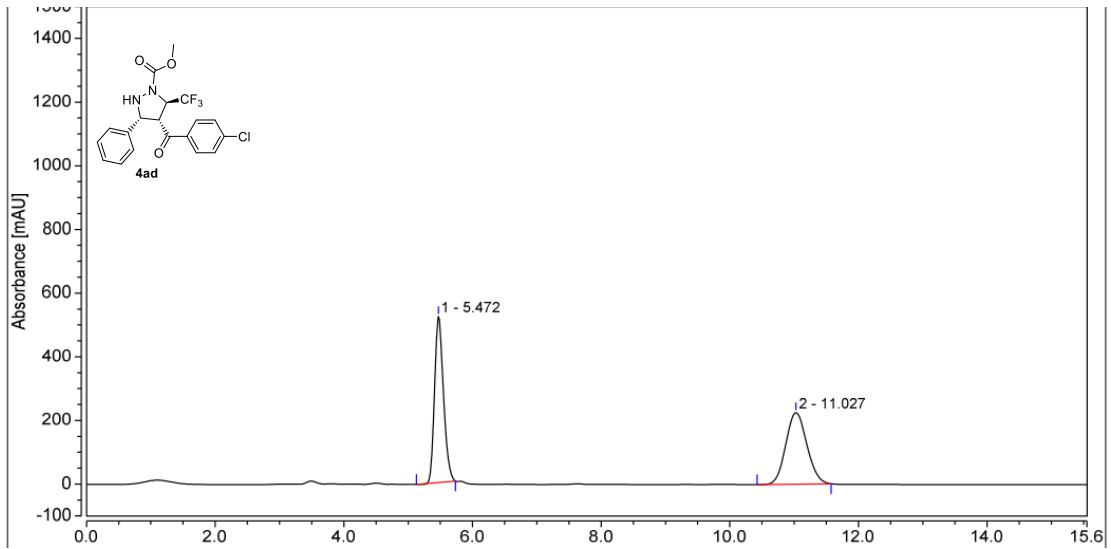

| Integration Results |           |                    |                |                |                 |                   |             |
|---------------------|-----------|--------------------|----------------|----------------|-----------------|-------------------|-------------|
| No.                 | Peak Name | Retention Time min | Area mAU*min   | Height mAU     | Relative Area % | Relative Height % | Amount n.a. |
| 1                   |           | 5.472              | 84.311         | 521.224        | 49.71           | 69.89             | n.a.        |
| 2                   |           | 11.027             | 85.294         | 224.562        | 50.29           | 30.11             | n.a.        |
| <b>Total:</b>       |           |                    | <b>169.605</b> | <b>745.787</b> | <b>100.00</b>   | <b>100.00</b>     |             |

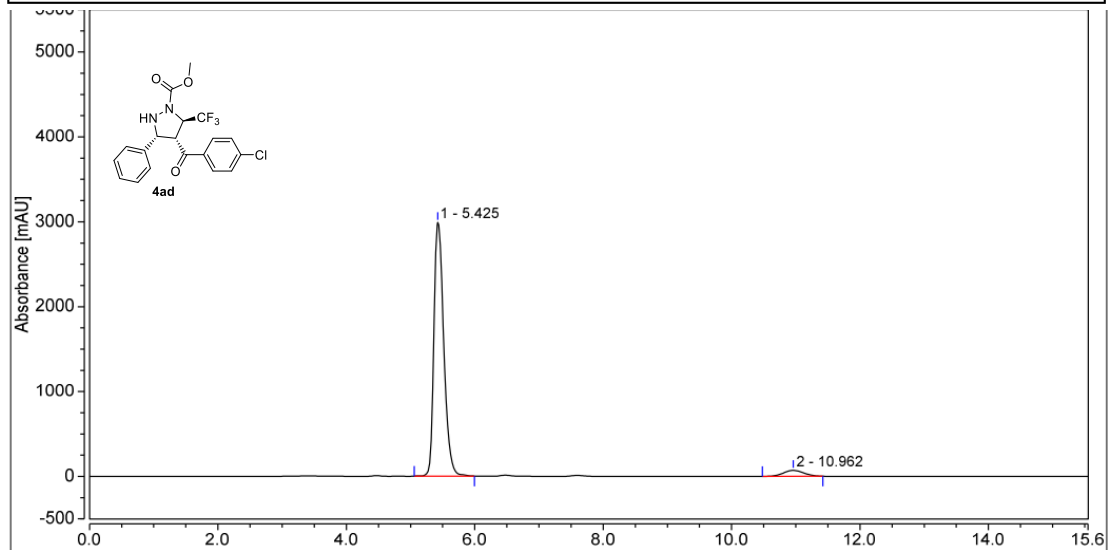

| Integration Results |           |                    |                |                 |                 |                   |             |
|---------------------|-----------|--------------------|----------------|-----------------|-----------------|-------------------|-------------|
| No.                 | Peak Name | Retention Time min | Area mAU*min   | Height mAU      | Relative Area % | Relative Height % | Amount n.a. |
| 1                   |           | 5.425              | 532.530        | 2990.806        | 95.34           | 97.72             | n.a.        |
| 2                   |           | 10.962             | 26.045         | 69.892          | 4.66            | 2.28              | n.a.        |
| <b>Total:</b>       |           |                    | <b>558.575</b> | <b>3060.698</b> | <b>100.00</b>   | <b>100.00</b>     |             |

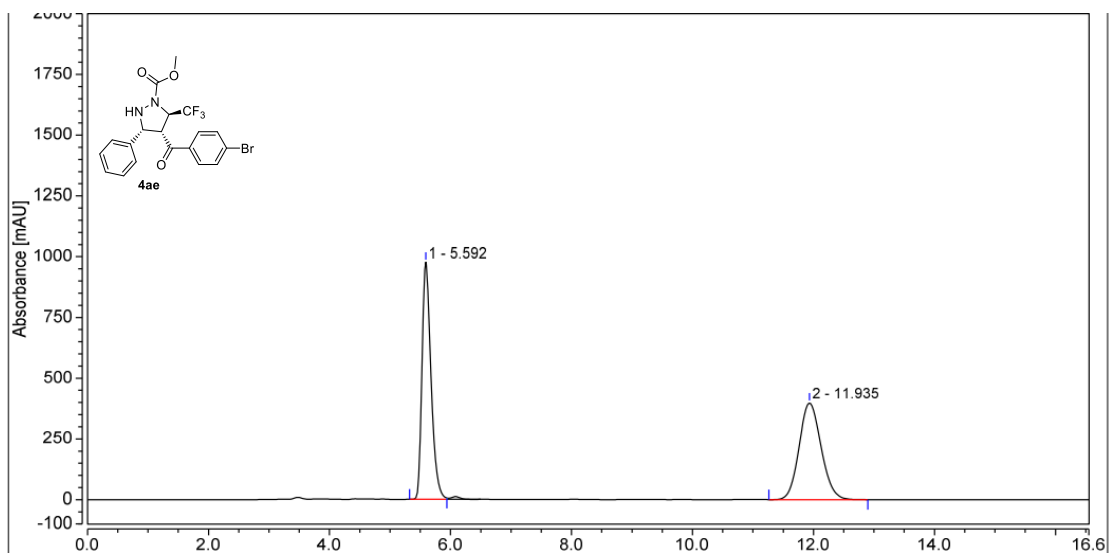

| Integration Results |           |                    |                |                 |                 |                   |             |
|---------------------|-----------|--------------------|----------------|-----------------|-----------------|-------------------|-------------|
| No.                 | Peak Name | Retention Time min | Area mAU*min   | Height mAU      | Relative Area % | Relative Height % | Amount n.a. |
| 1                   |           | 5.592              | 167.566        | 975.304         | 50.00           | 71.05             | n.a.        |
| 2                   |           | 11.935             | 167.548        | 397.370         | 50.00           | 28.95             | n.a.        |
| <b>Total:</b>       |           |                    | <b>335.114</b> | <b>1372.674</b> | <b>100.00</b>   | <b>100.00</b>     |             |

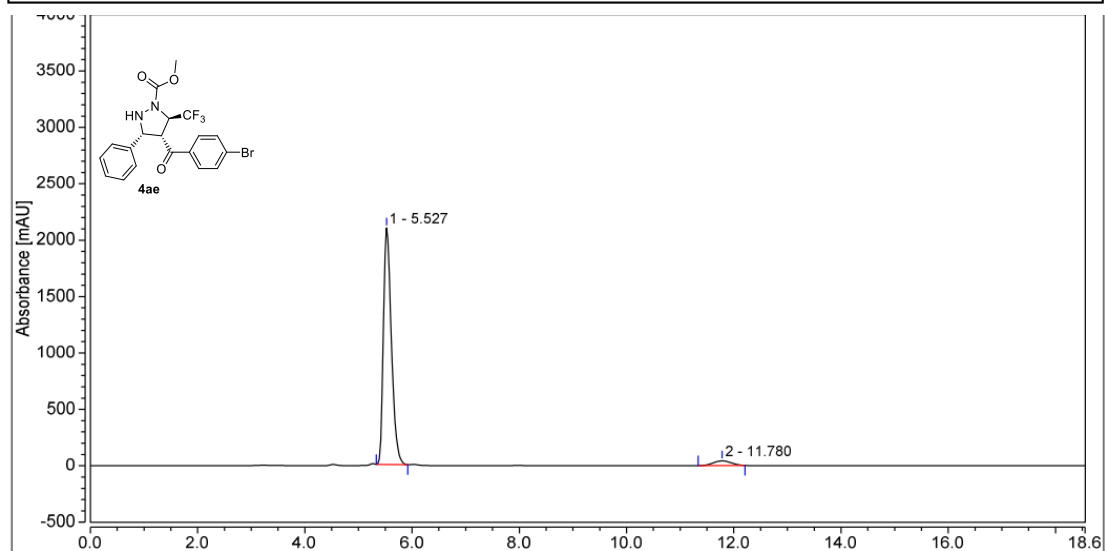

| Integration Results |           |                    |                |                 |                 |                   |             |
|---------------------|-----------|--------------------|----------------|-----------------|-----------------|-------------------|-------------|
| No.                 | Peak Name | Retention Time min | Area mAU*min   | Height mAU      | Relative Area % | Relative Height % | Amount n.a. |
| 1                   |           | 5.527              | 362.198        | 2098.538        | 95.68           | 98.05             | n.a.        |
| 2                   |           | 11.780             | 16.354         | 41.774          | 4.32            | 1.95              | n.a.        |
| <b>Total:</b>       |           |                    | <b>378.552</b> | <b>2140.313</b> | <b>100.00</b>   | <b>100.00</b>     |             |



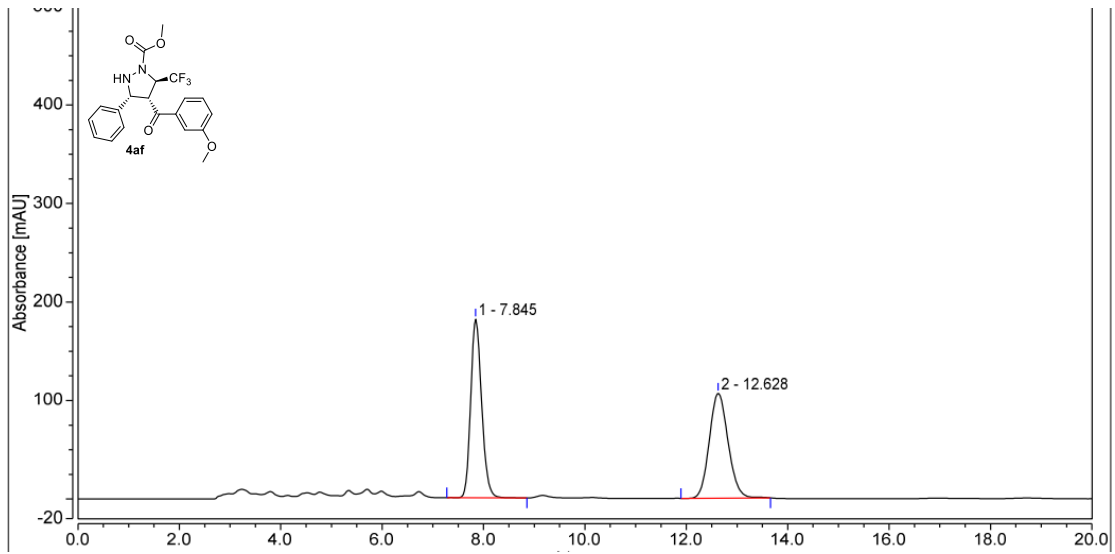

| Integration Results |           |                    |               |                |                 |                   |        |
|---------------------|-----------|--------------------|---------------|----------------|-----------------|-------------------|--------|
| No.                 | Peak Name | Retention Time min | Area mAU*min  | Height mAU     | Relative Area % | Relative Height % | Amount |
| 1                   |           | 7.845              | 45.513        | 181.698        | 49.90           | 63.03             | n.a.   |
| 2                   |           | 12.628             | 45.692        | 106.577        | 50.10           | 36.97             | n.a.   |
| <b>Total:</b>       |           |                    | <b>91.205</b> | <b>288.275</b> | <b>100.00</b>   | <b>100.00</b>     |        |

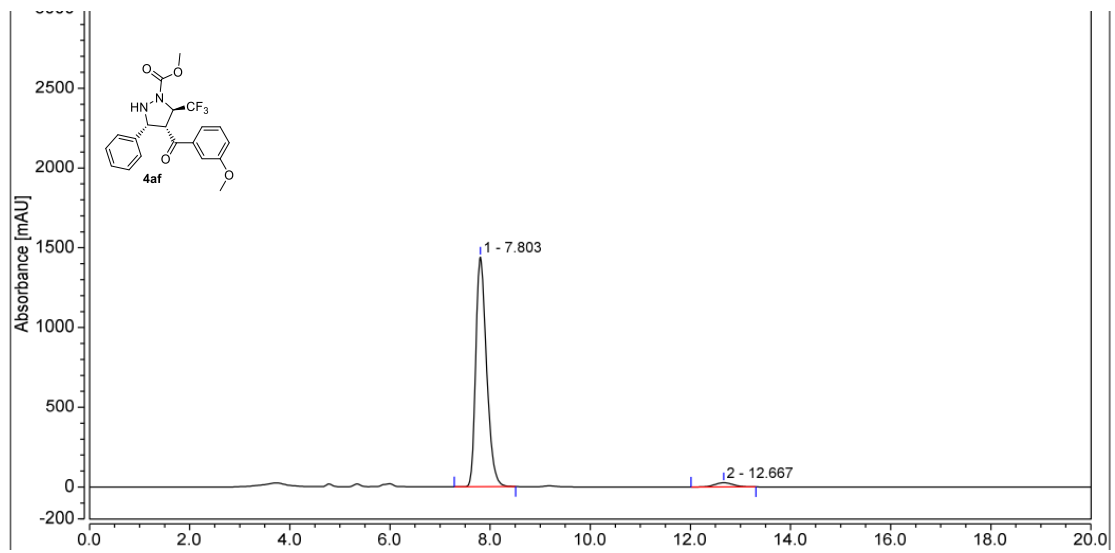

| Integration Results |           |                    |                |                 |                 |                   |        |
|---------------------|-----------|--------------------|----------------|-----------------|-----------------|-------------------|--------|
| No.                 | Peak Name | Retention Time min | Area mAU*min   | Height mAU      | Relative Area % | Relative Height % | Amount |
| 1                   |           | 7.803              | 361.171        | 1439.709        | 96.95           | 98.17             | n.a.   |
| 2                   |           | 12.667             | 11.350         | 26.809          | 3.05            | 1.83              | n.a.   |
| <b>Total:</b>       |           |                    | <b>372.522</b> | <b>1466.518</b> | <b>100.00</b>   | <b>100.00</b>     |        |

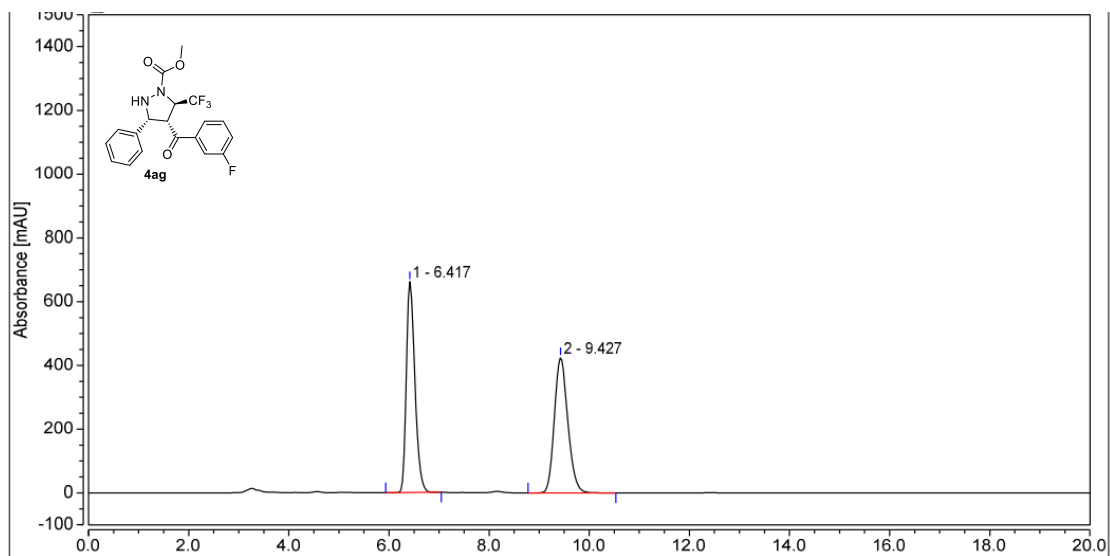

| Integration Results |           |                    |                |                 |                 |                   |             |
|---------------------|-----------|--------------------|----------------|-----------------|-----------------|-------------------|-------------|
| No.                 | Peak Name | Retention Time min | Area mAU*min   | Height mAU      | Relative Area % | Relative Height % | Amount n.a. |
| 1                   |           | 6.417              | 130.692        | 661.449         | 49.78           | 60.93             | n.a.        |
| 2                   |           | 9.427              | 131.835        | 424.090         | 50.22           | 39.07             | n.a.        |
| <b>Total:</b>       |           |                    | <b>262.527</b> | <b>1085.539</b> | <b>100.00</b>   | <b>100.00</b>     |             |

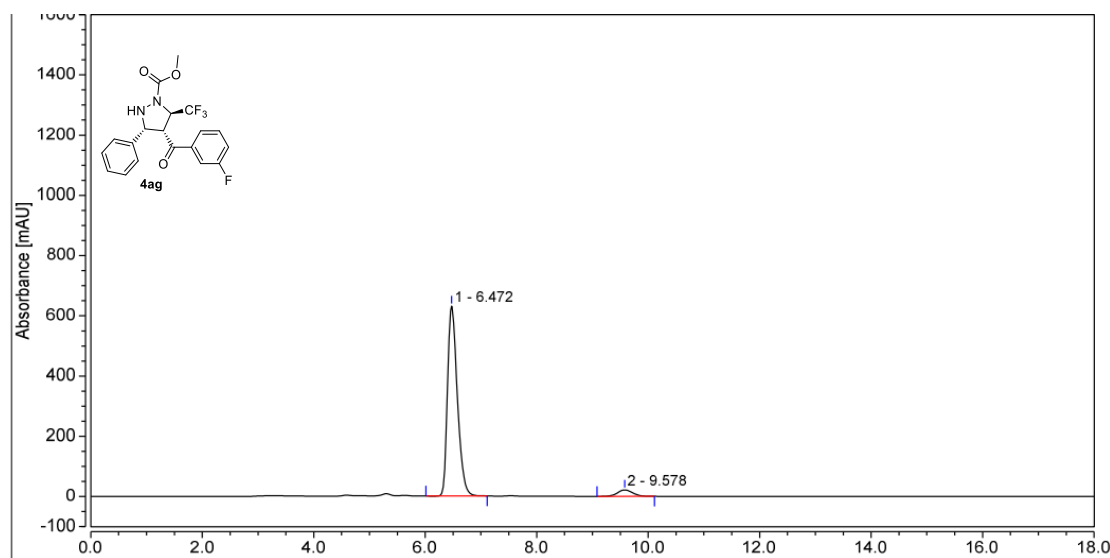

| Integration Results |           |                    |                |                |                 |                   |             |
|---------------------|-----------|--------------------|----------------|----------------|-----------------|-------------------|-------------|
| No.                 | Peak Name | Retention Time min | Area mAU*min   | Height mAU     | Relative Area % | Relative Height % | Amount n.a. |
| 1                   |           | 6.472              | 128.766        | 630.644        | 95.02           | 96.75             | n.a.        |
| 2                   |           | 9.578              | 6.752          | 21.153         | 4.98            | 3.25              | n.a.        |
| <b>Total:</b>       |           |                    | <b>135.518</b> | <b>651.797</b> | <b>100.00</b>   | <b>100.00</b>     |             |

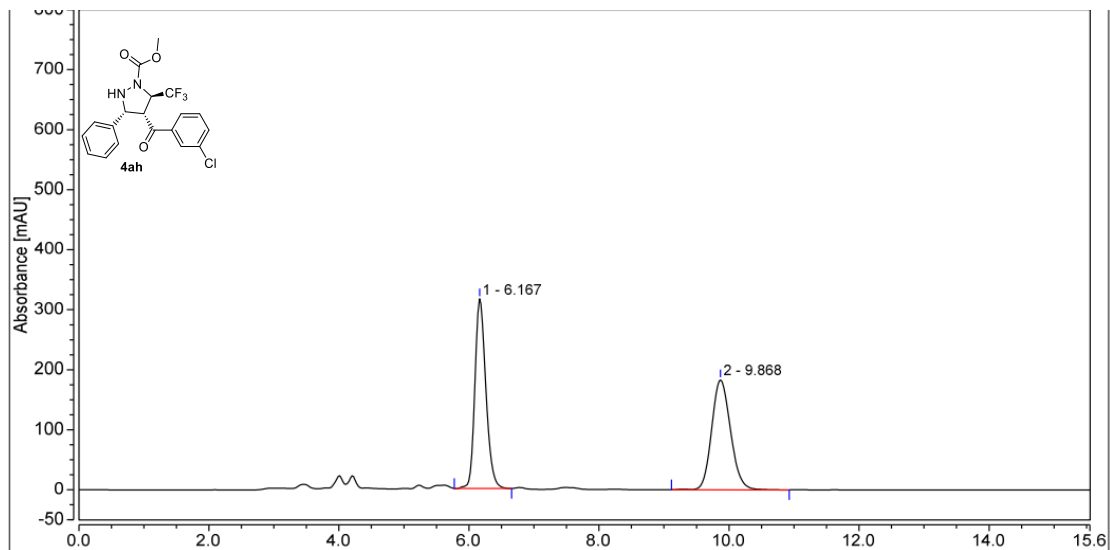

| Integration Results |           |                       |                 |                |                    |                      |                |
|---------------------|-----------|-----------------------|-----------------|----------------|--------------------|----------------------|----------------|
| No.                 | Peak Name | Retention Time<br>min | Area<br>mAU*min | Height<br>mAU  | Relative Area<br>% | Relative Height<br>% | Amount<br>n.a. |
| 1                   |           | 6.167                 | 61.756          | 316.107        | 50.05              | 63.31                | n.a.           |
| 2                   |           | 9.868                 | 61.622          | 183.197        | 49.95              | 36.69                | n.a.           |
| <b>Total:</b>       |           |                       | <b>123.378</b>  | <b>499.304</b> | <b>100.00</b>      | <b>100.00</b>        |                |

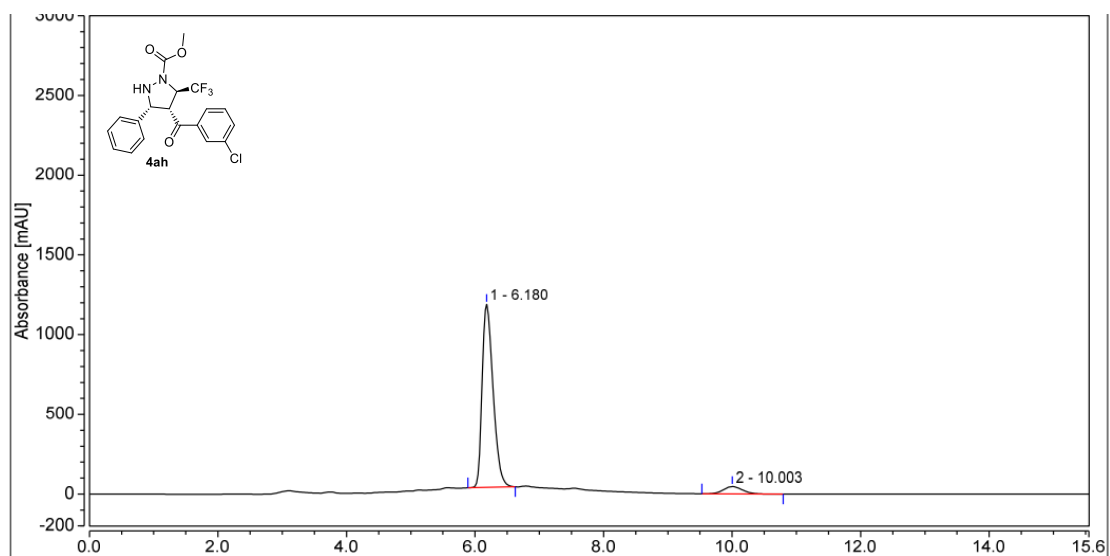

| Integration Results |           |                       |                 |                 |                    |                      |                |
|---------------------|-----------|-----------------------|-----------------|-----------------|--------------------|----------------------|----------------|
| No.                 | Peak Name | Retention Time<br>min | Area<br>mAU*min | Height<br>mAU   | Relative Area<br>% | Relative Height<br>% | Amount<br>n.a. |
| 1                   |           | 6.180                 | 225.989         | 1147.912        | 93.48              | 96.13                | n.a.           |
| 2                   |           | 10.003                | 15.759          | 46.174          | 6.52               | 3.87                 | n.a.           |
| <b>Total:</b>       |           |                       | <b>241.748</b>  | <b>1194.086</b> | <b>100.00</b>      | <b>100.00</b>        |                |

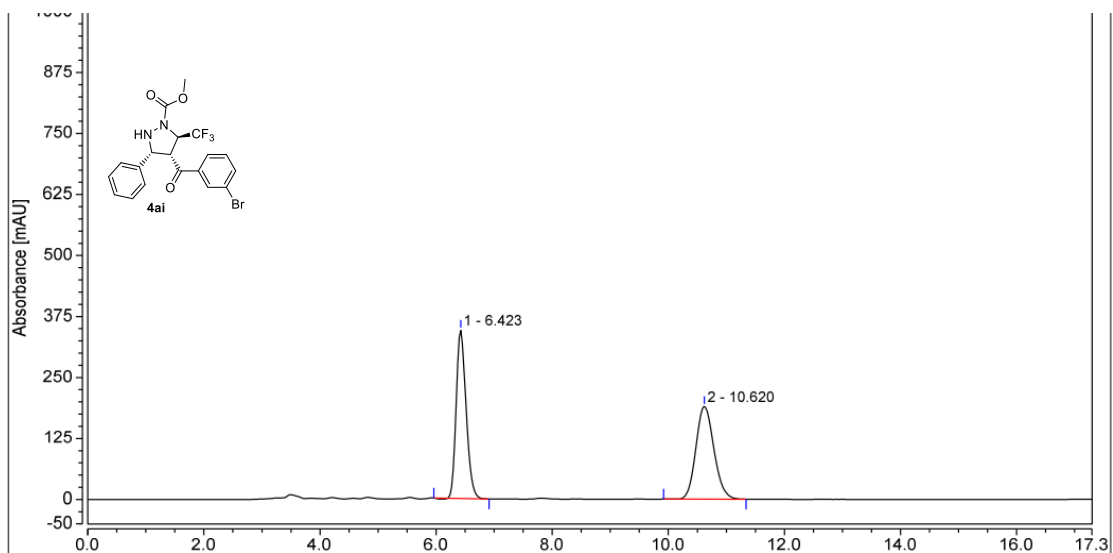

| Integration Results |           |                    |                |                |                 |                   |             |
|---------------------|-----------|--------------------|----------------|----------------|-----------------|-------------------|-------------|
| No.                 | Peak Name | Retention Time min | Area mAU*min   | Height mAU     | Relative Area % | Relative Height % | Amount n.a. |
| 1                   |           | 6.423              | 68.023         | 345.242        | 49.93           | 64.50             | n.a.        |
| 2                   |           | 10.620             | 68.212         | 189.989        | 50.07           | 35.50             | n.a.        |
| <b>Total:</b>       |           |                    | <b>136.234</b> | <b>535.231</b> | <b>100.00</b>   | <b>100.00</b>     |             |

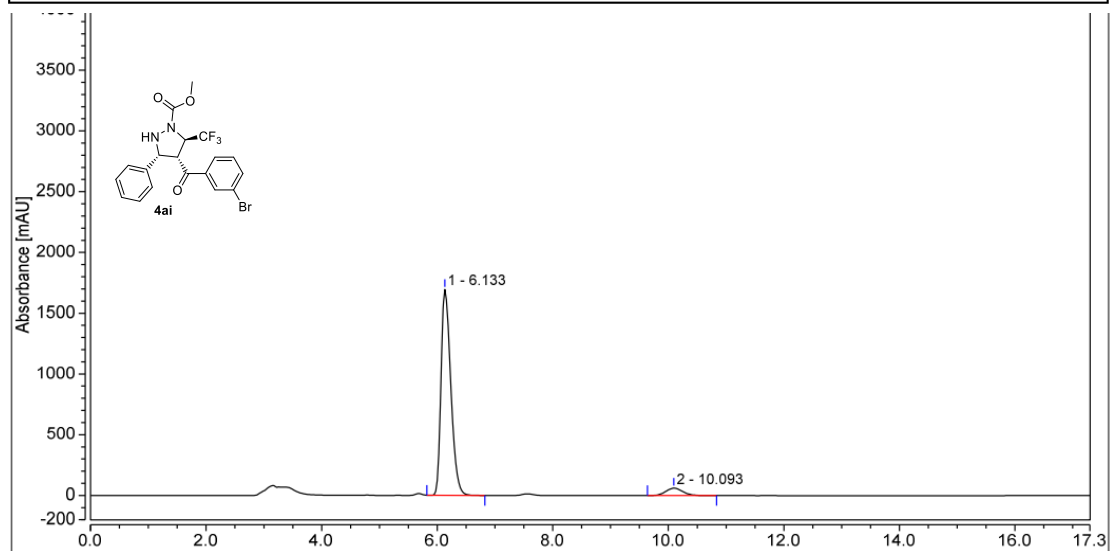

| Integration Results |           |                    |                |                 |                 |                   |             |
|---------------------|-----------|--------------------|----------------|-----------------|-----------------|-------------------|-------------|
| No.                 | Peak Name | Retention Time min | Area mAU*min   | Height mAU      | Relative Area % | Relative Height % | Amount n.a. |
| 1                   |           | 6.133              | 330.491        | 1693.540        | 94.05           | 96.53             | n.a.        |
| 2                   |           | 10.093             | 20.894         | 60.844          | 5.95            | 3.47              | n.a.        |
| <b>Total:</b>       |           |                    | <b>351.385</b> | <b>1754.384</b> | <b>100.00</b>   | <b>100.00</b>     |             |

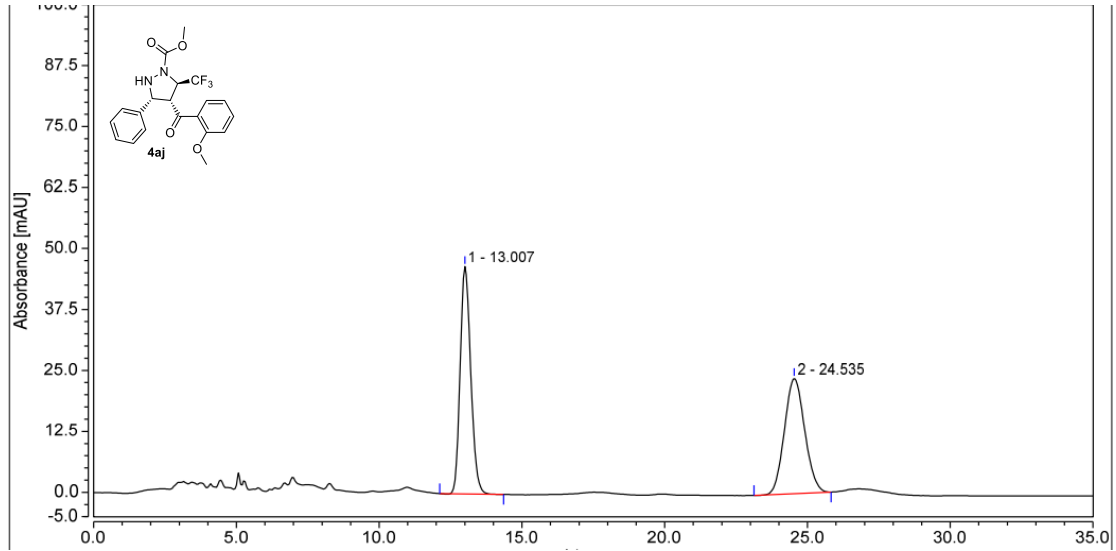

| Integration Results |           |                       |                 |               |                    |                      |                |
|---------------------|-----------|-----------------------|-----------------|---------------|--------------------|----------------------|----------------|
| No.                 | Peak Name | Retention Time<br>min | Area<br>mAU*min | Height<br>mAU | Relative Area<br>% | Relative Height<br>% | Amount<br>n.a. |
| 1                   |           | 13.007                | 20.011          | 46.634        | 50.75              | 66.38                | n.a.           |
| 2                   |           | 24.535                | 19.420          | 23.623        | 49.25              | 33.62                | n.a.           |
| <b>Total:</b>       |           |                       | <b>39.431</b>   | <b>70.257</b> | <b>100.00</b>      | <b>100.00</b>        |                |

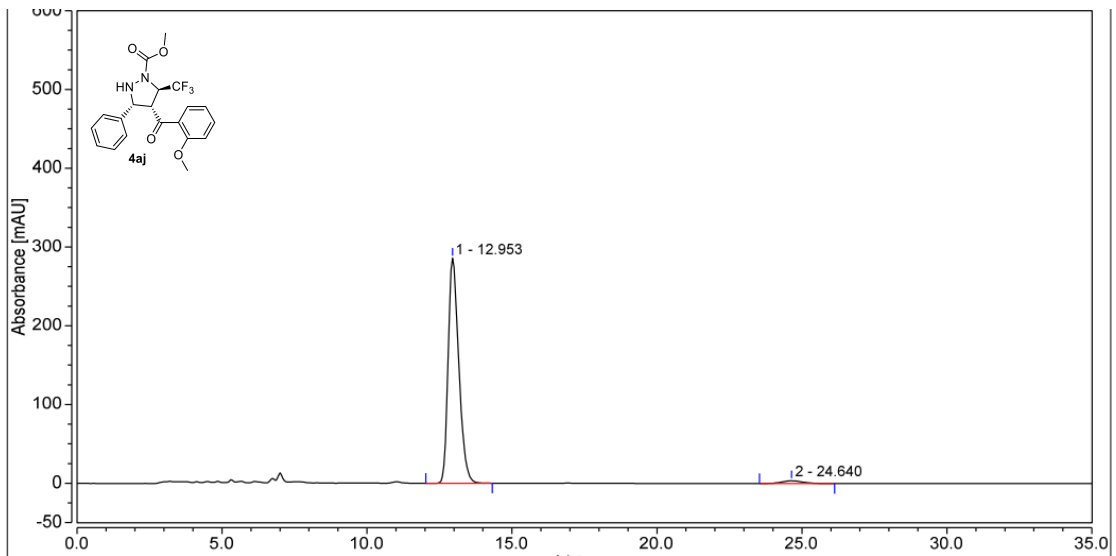

| Integration Results |           |                       |                 |                |                    |                      |                |
|---------------------|-----------|-----------------------|-----------------|----------------|--------------------|----------------------|----------------|
| No.                 | Peak Name | Retention Time<br>min | Area<br>mAU*min | Height<br>mAU  | Relative Area<br>% | Relative Height<br>% | Amount<br>n.a. |
| 1                   |           | 12.953                | 121.598         | 285.624        | 97.66              | 98.82                | n.a.           |
| 2                   |           | 24.640                | 2.918           | 3.425          | 2.34               | 1.18                 | n.a.           |
| <b>Total:</b>       |           |                       | <b>124.516</b>  | <b>289.049</b> | <b>100.00</b>      | <b>100.00</b>        |                |

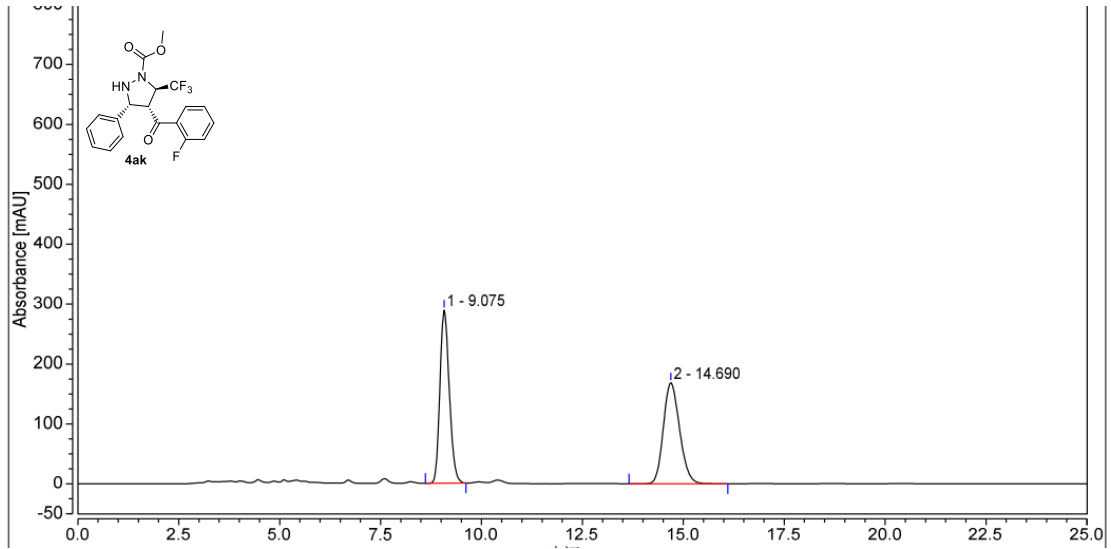

#### Integration Results

| No.           | Peak Name | Retention Time<br>min | Area<br>mAU*min | Height<br>mAU  | Relative Area<br>% | Relative Height<br>% | Amount<br>n.a. |
|---------------|-----------|-----------------------|-----------------|----------------|--------------------|----------------------|----------------|
| 1             |           | 9.075                 | 77.712          | 289.029        | 49.74              | 63.17                | n.a.           |
| 2             |           | 14.690                | 78.509          | 168.527        | 50.26              | 36.83                | n.a.           |
| <b>Total:</b> |           |                       | <b>156.221</b>  | <b>457.557</b> | <b>100.00</b>      | <b>100.00</b>        |                |

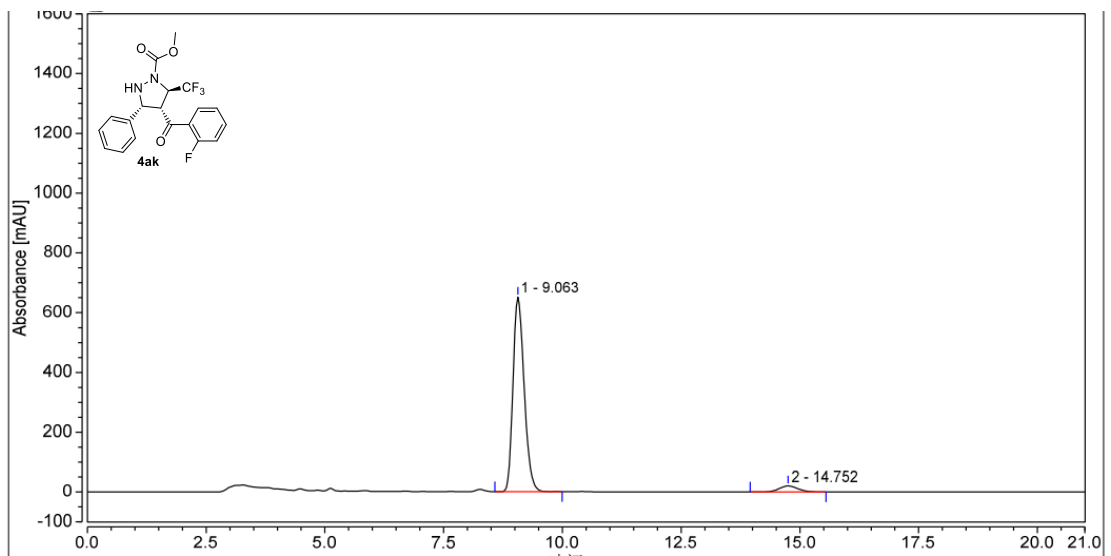

#### Integration Results

| No.           | Peak Name | Retention Time<br>min | Area<br>mAU*min | Height<br>mAU  | Relative Area<br>% | Relative Height<br>% | Amount<br>n.a. |
|---------------|-----------|-----------------------|-----------------|----------------|--------------------|----------------------|----------------|
| 1             |           | 9.063                 | 177.485         | 651.014        | 95.01              | 96.98                | n.a.           |
| 2             |           | 14.752                | 9.317           | 20.266         | 4.99               | 3.02                 | n.a.           |
| <b>Total:</b> |           |                       | <b>186.802</b>  | <b>671.280</b> | <b>100.00</b>      | <b>100.00</b>        |                |

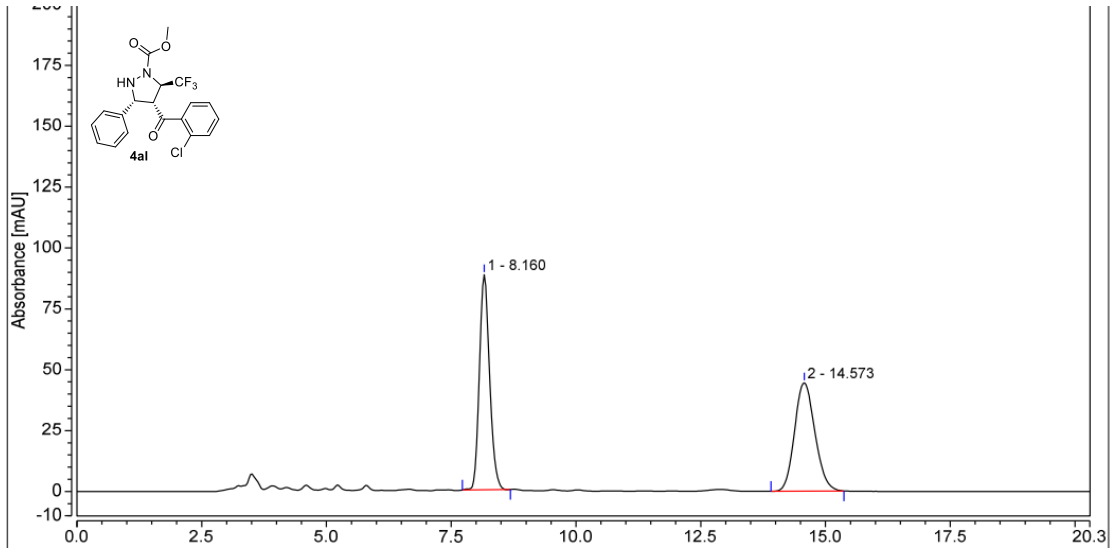

**Integration Results**

| No.           | Peak Name | Retention Time<br>min | Area<br>mAU*min | Height<br>mAU  | Relative Area<br>% | Relative Height<br>% | Amount<br>n.a. |
|---------------|-----------|-----------------------|-----------------|----------------|--------------------|----------------------|----------------|
| 1             |           | 8.160                 | 20.968          | 88.327         | 49.92              | 66.51                | n.a.           |
| 2             |           | 14.573                | 21.036          | 44.479         | 50.08              | 33.49                | n.a.           |
| <b>Total:</b> |           |                       | <b>42.004</b>   | <b>132.806</b> | <b>100.00</b>      | <b>100.00</b>        |                |

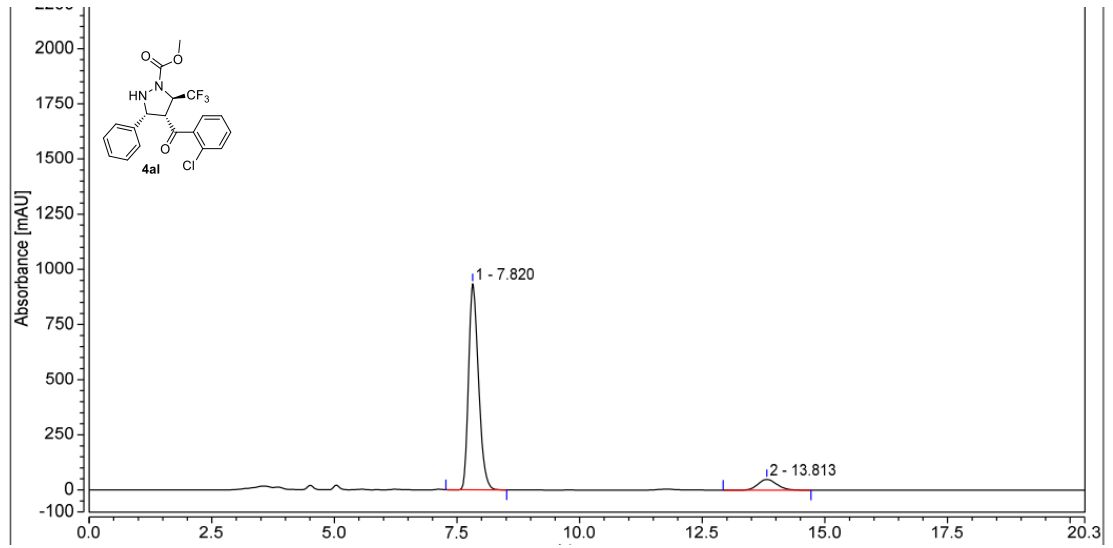

**Integration Results**

| No.           | Peak Name | Retention Time<br>min | Area<br>mAU*min | Height<br>mAU  | Relative Area<br>% | Relative Height<br>% | Amount<br>n.a. |
|---------------|-----------|-----------------------|-----------------|----------------|--------------------|----------------------|----------------|
| 1             |           | 7.820                 | 219.602         | 934.028        | 91.02              | 95.06                | n.a.           |
| 2             |           | 13.813                | 21.667          | 48.547         | 8.98               | 4.94                 | n.a.           |
| <b>Total:</b> |           |                       | <b>241.270</b>  | <b>982.575</b> | <b>100.00</b>      | <b>100.00</b>        |                |

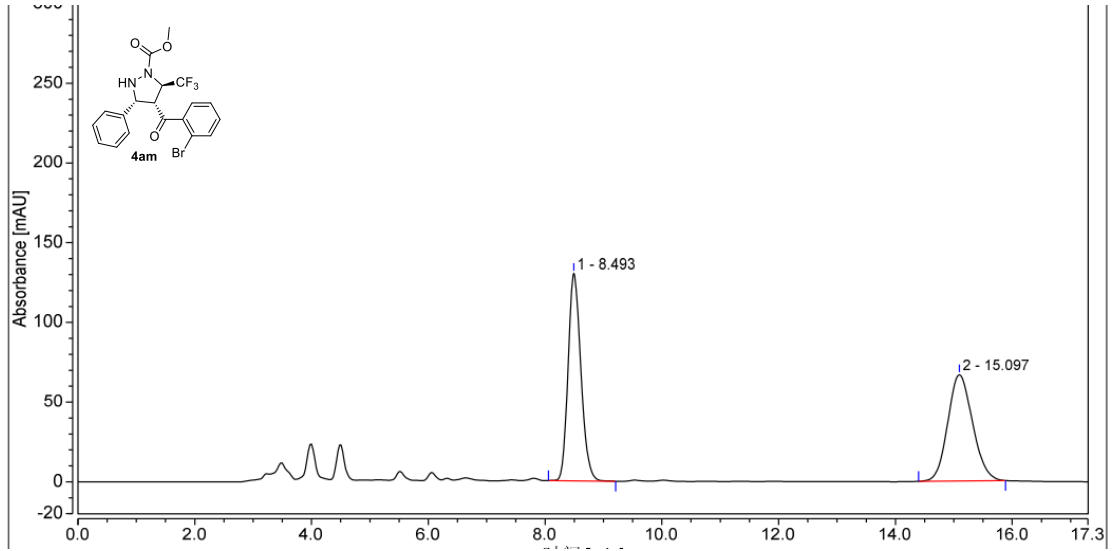

| Integration Results |           |                       |                 |                |                    |                      |                |
|---------------------|-----------|-----------------------|-----------------|----------------|--------------------|----------------------|----------------|
| No.                 | Peak Name | Retention Time<br>min | Area<br>mAU*min | Height<br>mAU  | Relative Area<br>% | Relative Height<br>% | Amount<br>n.a. |
| 1                   |           | 8.493                 | 33.073          | 130.109        | 50.21              | 66.12                | n.a.           |
| 2                   |           | 15.097                | 32.800          | 66.678         | 49.79              | 33.88                | n.a.           |
| <b>Total:</b>       |           |                       | <b>65.873</b>   | <b>196.787</b> | <b>100.00</b>      | <b>100.00</b>        |                |

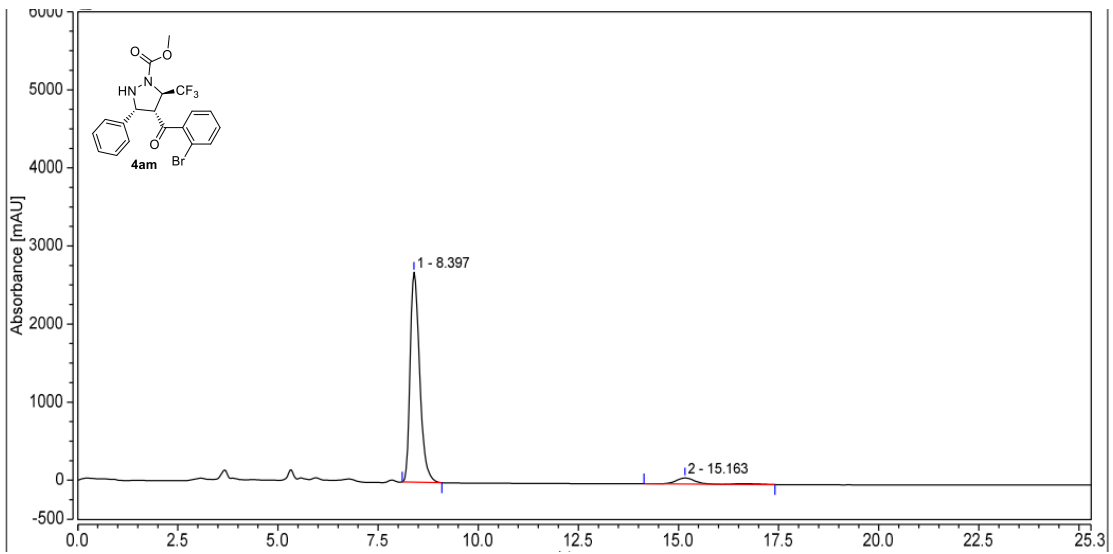

| Integration Results |           |                       |                 |                 |                    |                      |                |
|---------------------|-----------|-----------------------|-----------------|-----------------|--------------------|----------------------|----------------|
| No.                 | Peak Name | Retention Time<br>min | Area<br>mAU*min | Height<br>mAU   | Relative Area<br>% | Relative Height<br>% | Amount<br>n.a. |
| 1                   |           | 8.397                 | 741.747         | 2689.607        | 93.89              | 97.18                | n.a.           |
| 2                   |           | 15.163                | 48.277          | 77.959          | 6.11               | 2.82                 | n.a.           |
| <b>Total:</b>       |           |                       | <b>790.024</b>  | <b>2767.566</b> | <b>100.00</b>      | <b>100.00</b>        |                |



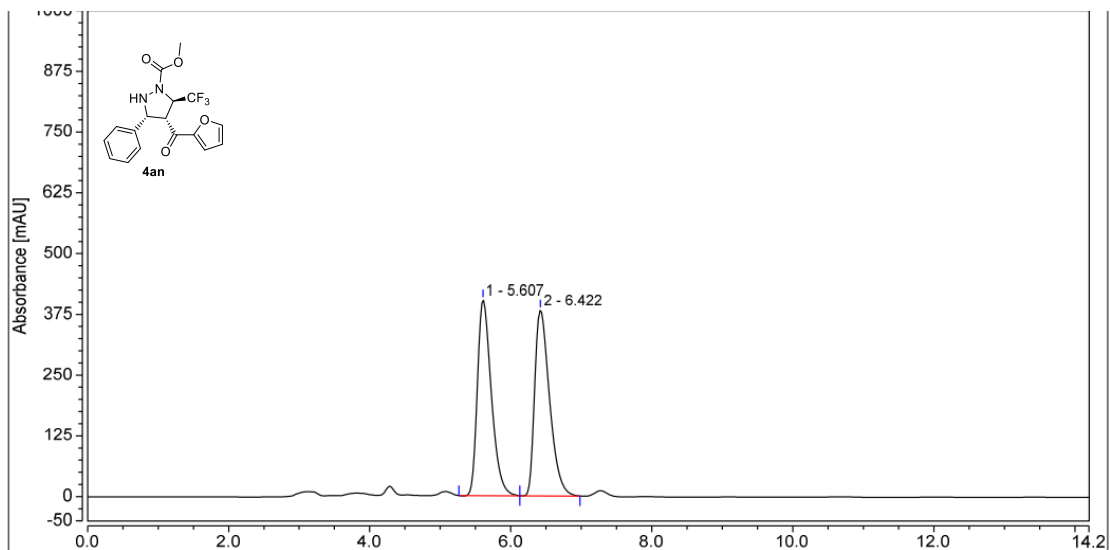

#### Integration Results

| No.           | Peak Name | Retention Time<br>min | Area<br>mAU*min | Height<br>mAU  | Relative Area<br>% | Relative Height<br>% | Amount |
|---------------|-----------|-----------------------|-----------------|----------------|--------------------|----------------------|--------|
| 1             |           | 5.607                 | 92.614          | 403.390        | 50.02              | 51.31                | n.a.   |
| 2             |           | 6.422                 | 92.540          | 382.809        | 49.98              | 48.69                | n.a.   |
| <b>Total:</b> |           |                       | <b>185.154</b>  | <b>786.198</b> | <b>100.00</b>      | <b>100.00</b>        |        |

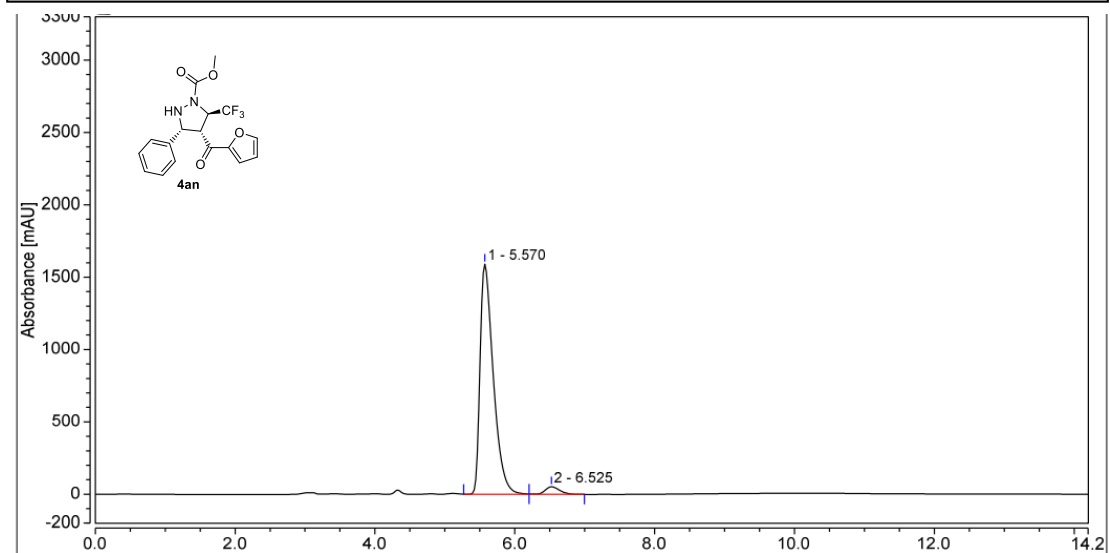

#### Integration Results

| No.           | Peak Name | Retention Time<br>min | Area<br>mAU*min | Height<br>mAU   | Relative Area<br>% | Relative Height<br>% | Amount |
|---------------|-----------|-----------------------|-----------------|-----------------|--------------------|----------------------|--------|
| 1             |           | 5.570                 | 349.679         | 1590.698        | 96.51              | 96.81                | n.a.   |
| 2             |           | 6.525                 | 12.652          | 52.500          | 3.49               | 3.19                 | n.a.   |
| <b>Total:</b> |           |                       | <b>362.331</b>  | <b>1643.197</b> | <b>100.00</b>      | <b>100.00</b>        |        |

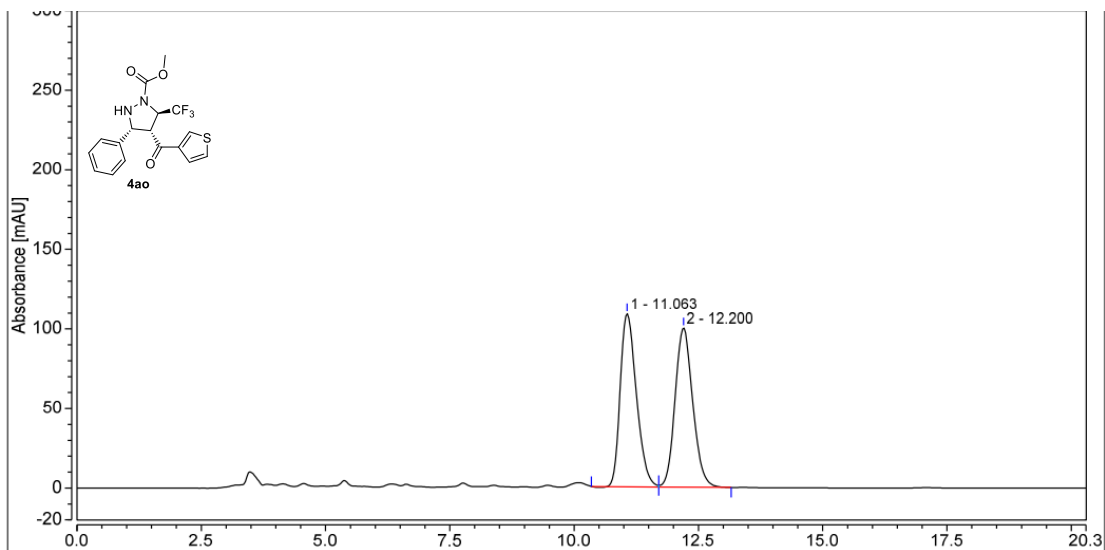

#### Integration Results

| No.           | Peak Name | Retention Time<br>min | Area<br>mAU*min | Height<br>mAU  | Relative Area<br>% | Relative Height<br>% | Amount |
|---------------|-----------|-----------------------|-----------------|----------------|--------------------|----------------------|--------|
| 1             |           | 11.063                | 40.936          | 108.781        | 49.81              | 52.08                | n.a.   |
| 2             |           | 12.200                | 41.245          | 100.102        | 50.19              | 47.92                | n.a.   |
| <b>Total:</b> |           |                       | <b>82.181</b>   | <b>208.883</b> | <b>100.00</b>      | <b>100.00</b>        |        |

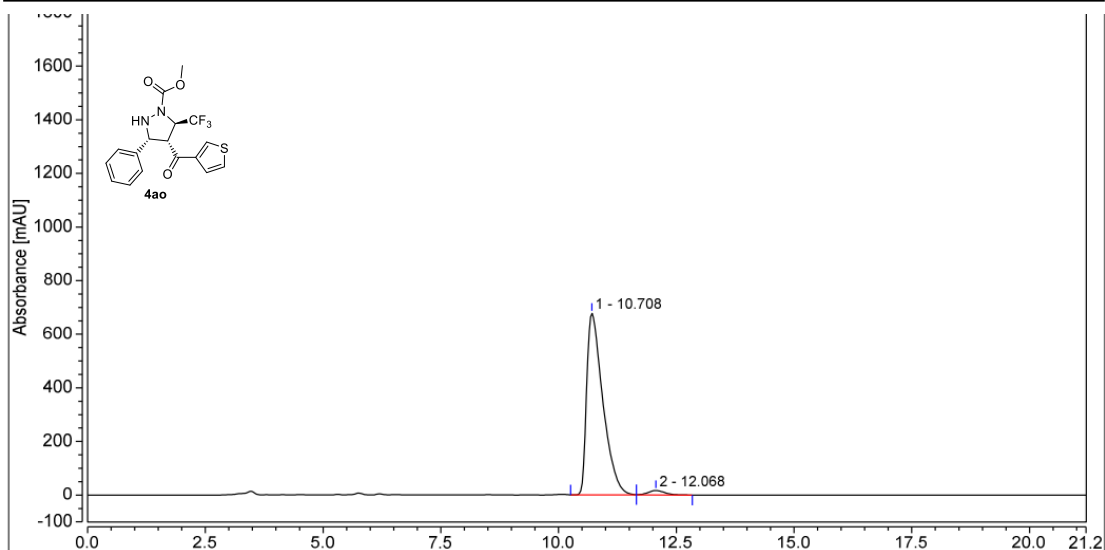

#### Integration Results

| No.           | Peak Name | Retention Time<br>min | Area<br>mAU*min | Height<br>mAU  | Relative Area<br>% | Relative Height<br>% | Amount |
|---------------|-----------|-----------------------|-----------------|----------------|--------------------|----------------------|--------|
| 1             |           | 10.708                | 269.486         | 677.375        | 97.49              | 97.60                | n.a.   |
| 2             |           | 12.068                | 6.936           | 16.641         | 2.51               | 2.40                 | n.a.   |
| <b>Total:</b> |           |                       | <b>276.422</b>  | <b>694.016</b> | <b>100.00</b>      | <b>100.00</b>        |        |

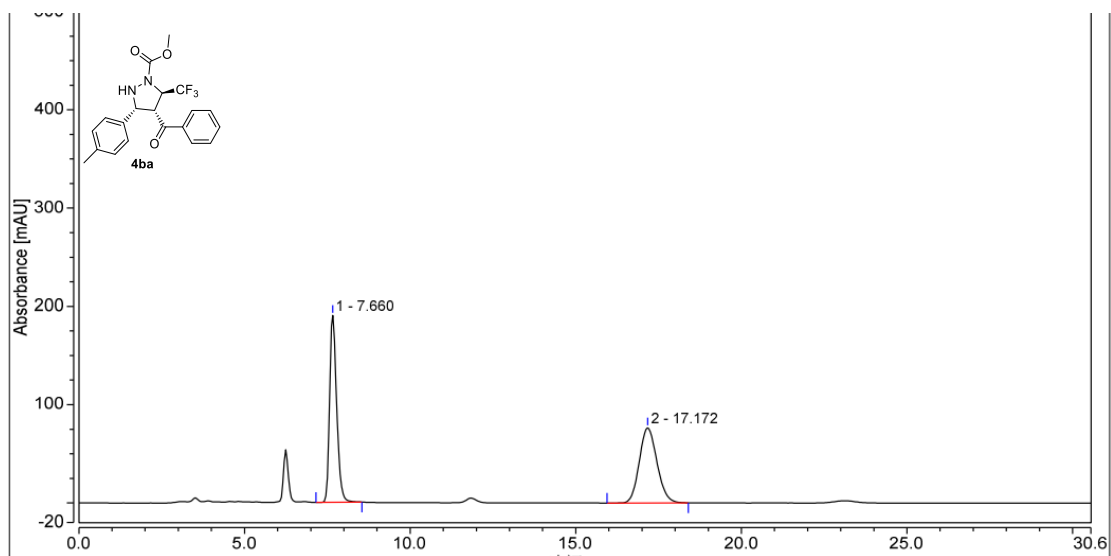

| Integration Results |           |                    |               |                |                 |                   |        |
|---------------------|-----------|--------------------|---------------|----------------|-----------------|-------------------|--------|
| No.                 | Peak Name | Retention Time min | Area mAU*min  | Height mAU     | Relative Area % | Relative Height % | Amount |
| 1                   |           | 7.660              | 47.032        | 190.259        | 49.84           | 71.35             | n.a.   |
| 2                   |           | 17.172             | 47.341        | 76.401         | 50.16           | 28.65             | n.a.   |
| <b>Total:</b>       |           |                    | <b>94.373</b> | <b>266.660</b> | <b>100.00</b>   | <b>100.00</b>     |        |

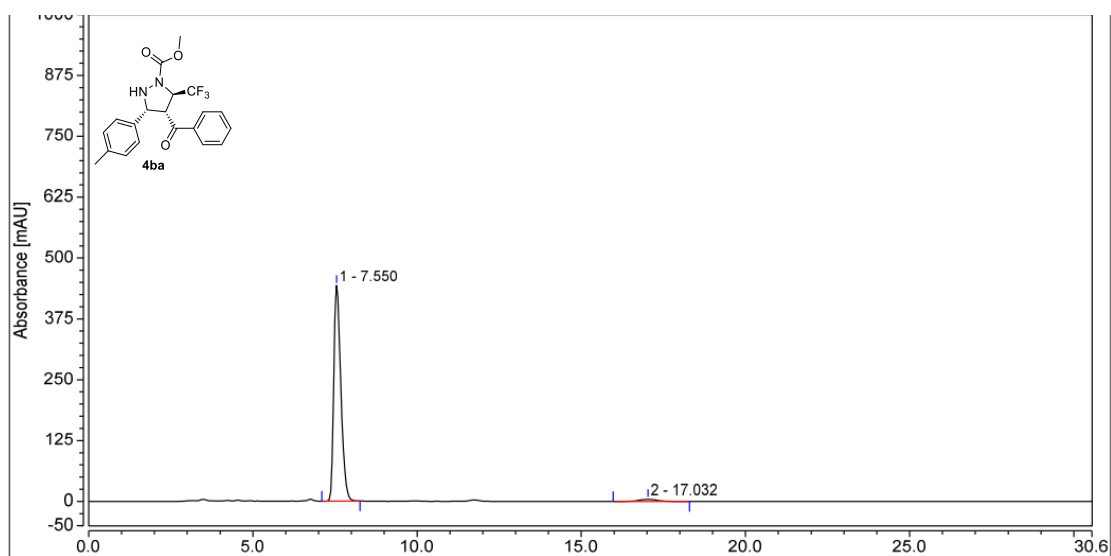

| Integration Results |           |                    |                |                |                 |                   |        |
|---------------------|-----------|--------------------|----------------|----------------|-----------------|-------------------|--------|
| No.                 | Peak Name | Retention Time min | Area mAU*min   | Height mAU     | Relative Area % | Relative Height % | Amount |
| 1                   |           | 7.550              | 110.140        | 442.909        | 97.72           | 99.05             | n.a.   |
| 2                   |           | 17.032             | 2.567          | 4.245          | 2.28            | 0.95              | n.a.   |
| <b>Total:</b>       |           |                    | <b>112.707</b> | <b>447.154</b> | <b>100.00</b>   | <b>100.00</b>     |        |

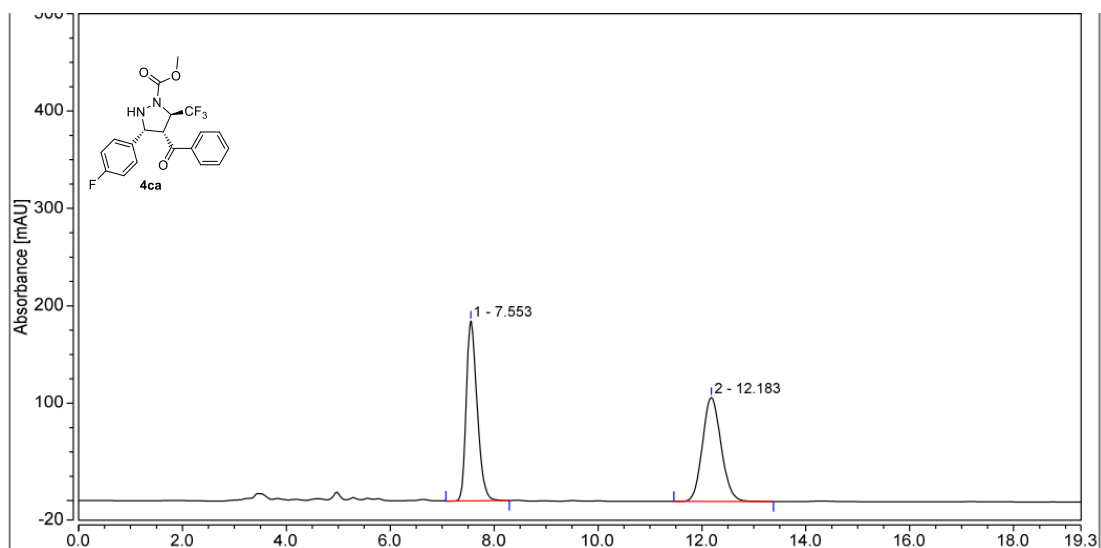

| Integration Results |           |                    |               |                |                 |                   |             |
|---------------------|-----------|--------------------|---------------|----------------|-----------------|-------------------|-------------|
| No.                 | Peak Name | Retention Time min | Area mAU*min  | Height mAU     | Relative Area % | Relative Height % | Amount n.a. |
| 1                   |           | 7.553              | 44.745        | 184.540        | 50.16           | 63.33             | n.a.        |
| 2                   |           | 12.183             | 44.457        | 106.870        | 49.84           | 36.67             | n.a.        |
| <b>Total:</b>       |           |                    | <b>89.202</b> | <b>291.410</b> | <b>100.00</b>   | <b>100.00</b>     |             |

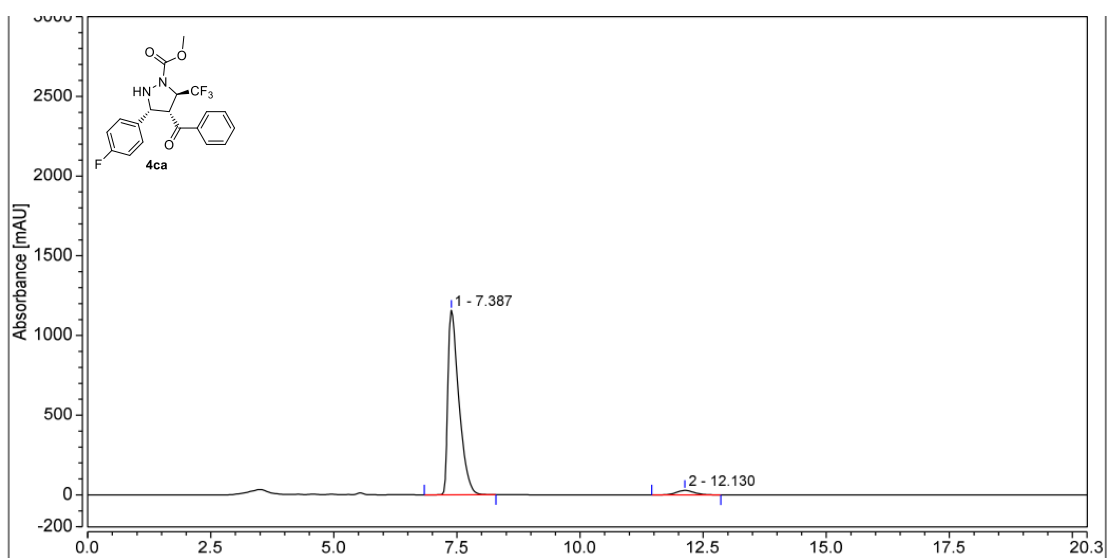

| Integration Results |           |                    |                |                 |                 |                   |             |
|---------------------|-----------|--------------------|----------------|-----------------|-----------------|-------------------|-------------|
| No.                 | Peak Name | Retention Time min | Area mAU*min   | Height mAU      | Relative Area % | Relative Height % | Amount n.a. |
| 1                   |           | 7.387              | 298.990        | 1157.045        | 96.23           | 97.64             | n.a.        |
| 2                   |           | 12.130             | 11.710         | 27.997          | 3.77            | 2.36              | n.a.        |
| <b>Total:</b>       |           |                    | <b>310.699</b> | <b>1185.042</b> | <b>100.00</b>   | <b>100.00</b>     |             |

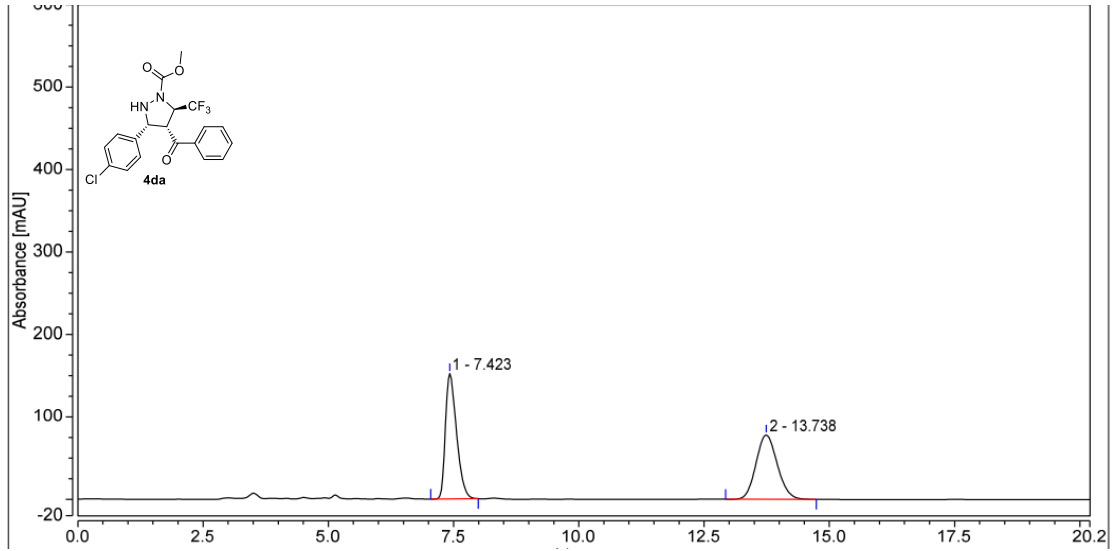

| Integration Results |           |                       |                 |                |                    |                      |                |
|---------------------|-----------|-----------------------|-----------------|----------------|--------------------|----------------------|----------------|
| No.                 | Peak Name | Retention Time<br>min | Area<br>mAU*min | Height<br>mAU  | Relative Area<br>% | Relative Height<br>% | Amount<br>n.a. |
| 1                   |           | 7.423                 | 39.020          | 152.043        | 50.40              | 66.10                | n.a.           |
| 2                   |           | 13.738                | 38.407          | 77.984         | 49.60              | 33.90                | n.a.           |
| <b>Total:</b>       |           |                       | <b>77.427</b>   | <b>230.028</b> | <b>100.00</b>      | <b>100.00</b>        |                |

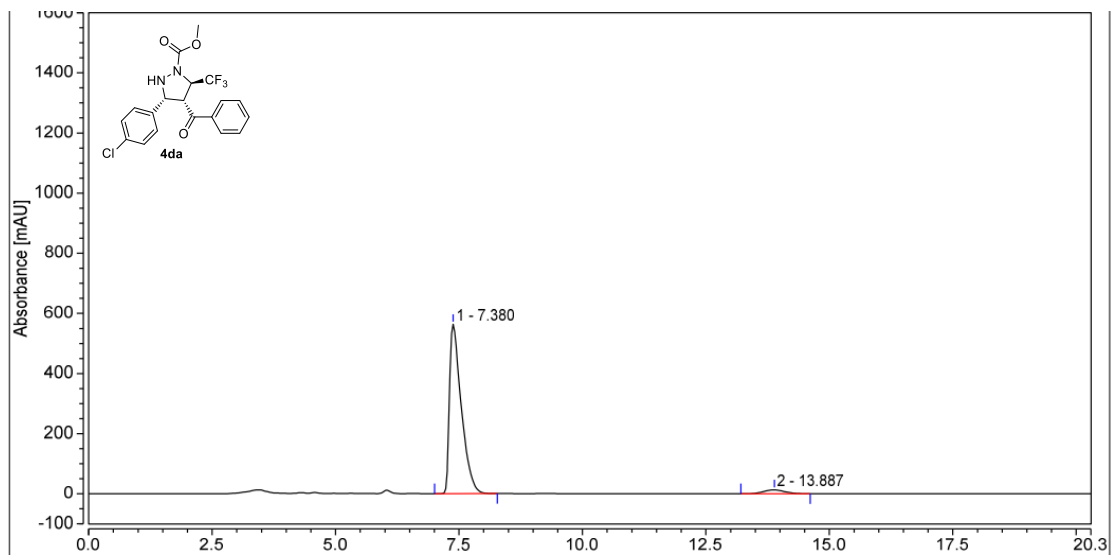

| Integration Results |           |                       |                 |                |                    |                      |                |
|---------------------|-----------|-----------------------|-----------------|----------------|--------------------|----------------------|----------------|
| No.                 | Peak Name | Retention Time<br>min | Area<br>mAU*min | Height<br>mAU  | Relative Area<br>% | Relative Height<br>% | Amount<br>n.a. |
| 1                   |           | 7.380                 | 155.840         | 562.915        | 96.03              | 97.77                | n.a.           |
| 2                   |           | 13.887                | 6.447           | 12.847         | 3.97               | 2.23                 | n.a.           |
| <b>Total:</b>       |           |                       | <b>162.287</b>  | <b>575.762</b> | <b>100.00</b>      | <b>100.00</b>        |                |

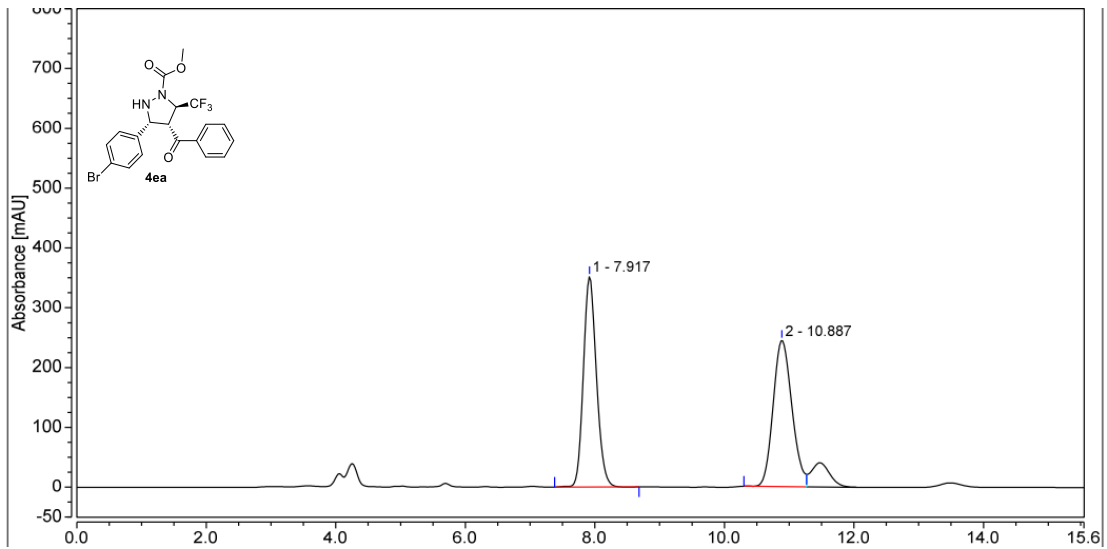

| Integration Results |           |                    |                |                |                 |                   |        |
|---------------------|-----------|--------------------|----------------|----------------|-----------------|-------------------|--------|
| No.                 | Peak Name | Retention Time min | Area mAU*min   | Height mAU     | Relative Area % | Relative Height % | Amount |
| 1                   |           | 7.917              | 83.013         | 352.095        | 50.35           | 59.00             | n.a.   |
| 2                   |           | 10.887             | 81.856         | 244.657        | 49.65           | 41.00             | n.a.   |
| <b>Total:</b>       |           |                    | <b>164.869</b> | <b>596.752</b> | <b>100.00</b>   | <b>100.00</b>     |        |

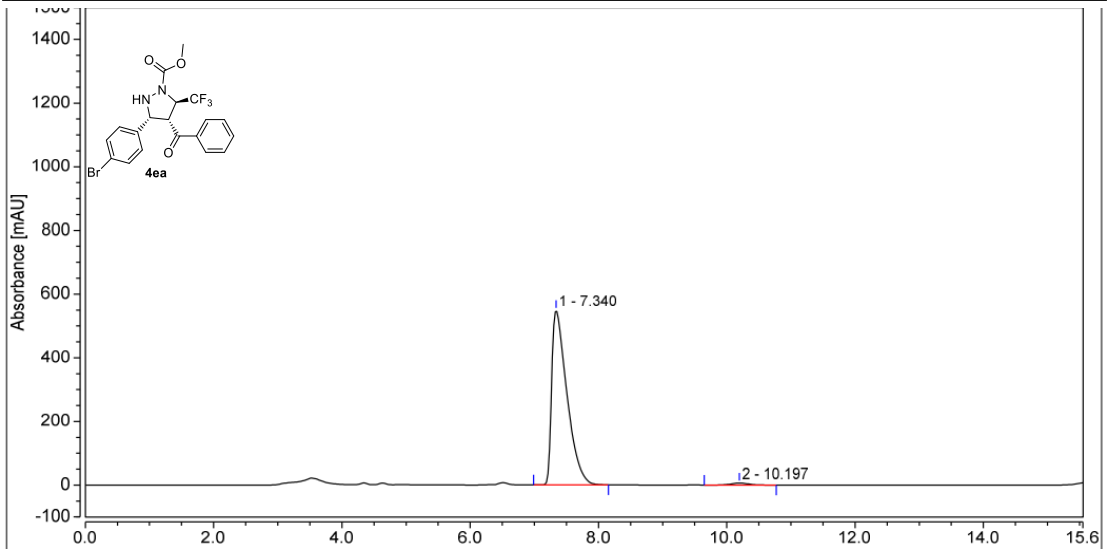

| Integration Results |           |                    |                |                |                 |                   |        |
|---------------------|-----------|--------------------|----------------|----------------|-----------------|-------------------|--------|
| No.                 | Peak Name | Retention Time min | Area mAU*min   | Height mAU     | Relative Area % | Relative Height % | Amount |
| 1                   |           | 7.340              | 150.872        | 548.024        | 98.74           | 98.87             | n.a.   |
| 2                   |           | 10.197             | 1.927          | 6.266          | 1.26            | 1.13              | n.a.   |
| <b>Total:</b>       |           |                    | <b>152.799</b> | <b>554.290</b> | <b>100.00</b>   | <b>100.00</b>     |        |

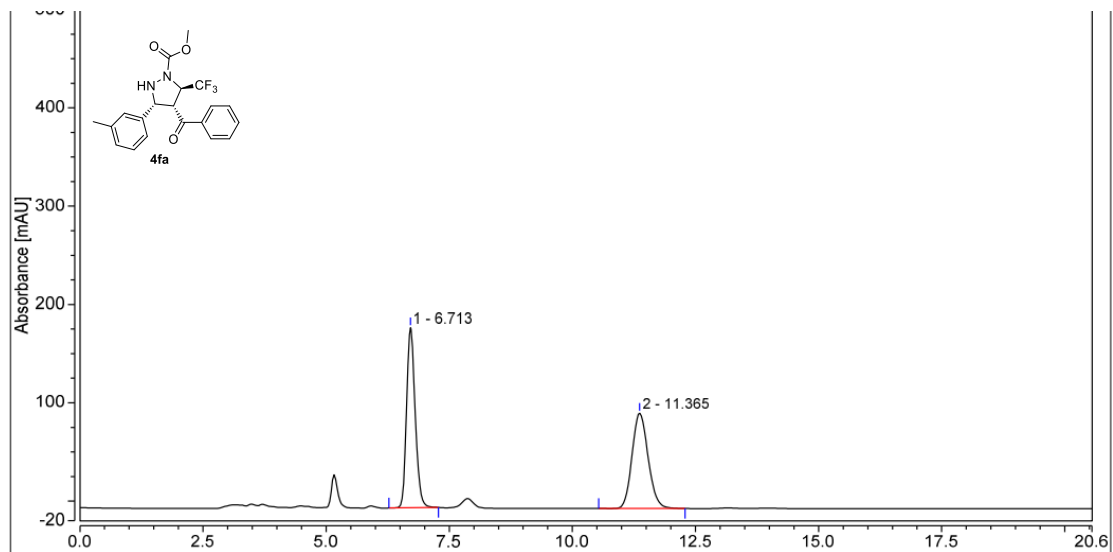

| Integration Results |           |                    |               |                |                 |                   |        |
|---------------------|-----------|--------------------|---------------|----------------|-----------------|-------------------|--------|
| No.                 | Peak Name | Retention Time min | Area mAU*min  | Height mAU     | Relative Area % | Relative Height % | Amount |
| 1                   |           | 6.713              | 37.155        | 183.050        | 50.27           | 65.36             | n.a.   |
| 2                   |           | 11.365             | 36.754        | 97.025         | 49.73           | 34.64             | n.a.   |
| <b>Total:</b>       |           |                    | <b>73.908</b> | <b>280.075</b> | <b>100.00</b>   | <b>100.00</b>     |        |

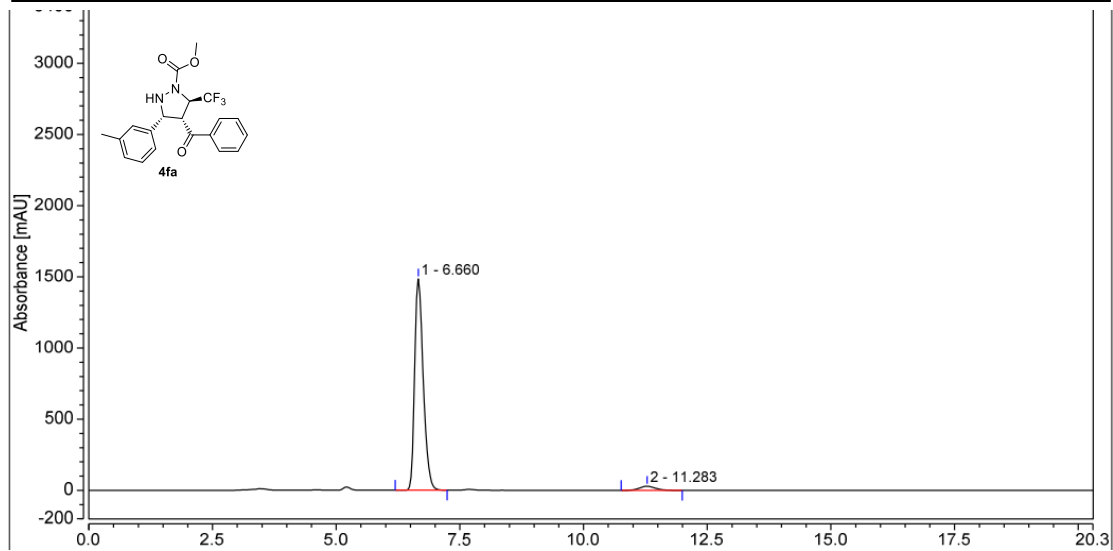

| Integration Results |           |                    |                |                 |                 |                   |        |
|---------------------|-----------|--------------------|----------------|-----------------|-----------------|-------------------|--------|
| No.                 | Peak Name | Retention Time min | Area mAU*min   | Height mAU      | Relative Area % | Relative Height % | Amount |
| 1                   |           | 6.660              | 298.829        | 1484.752        | 96.56           | 98.10             | n.a.   |
| 2                   |           | 11.283             | 10.653         | 28.826          | 3.44            | 1.90              | n.a.   |
| <b>Total:</b>       |           |                    | <b>309.483</b> | <b>1513.577</b> | <b>100.00</b>   | <b>100.00</b>     |        |

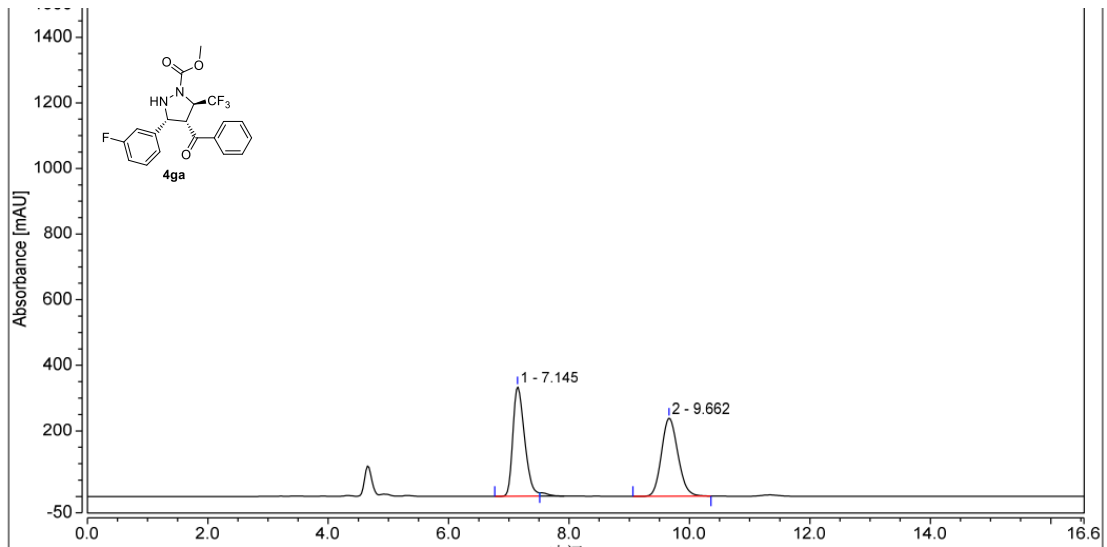

| Integration Results |           |                    |                |                |                 |                   |        |
|---------------------|-----------|--------------------|----------------|----------------|-----------------|-------------------|--------|
| No.                 | Peak Name | Retention Time min | Area mAU*min   | Height mAU     | Relative Area % | Relative Height % | Amount |
| 1                   |           | 7.145              | 74.977         | 333.801        | 50.03           | 58.35             | n.a.   |
| 2                   |           | 9.662              | 74.897         | 238.307        | 49.97           | 41.65             | n.a.   |
| <b>Total:</b>       |           |                    | <b>149.874</b> | <b>572.109</b> | <b>100.00</b>   | <b>100.00</b>     |        |

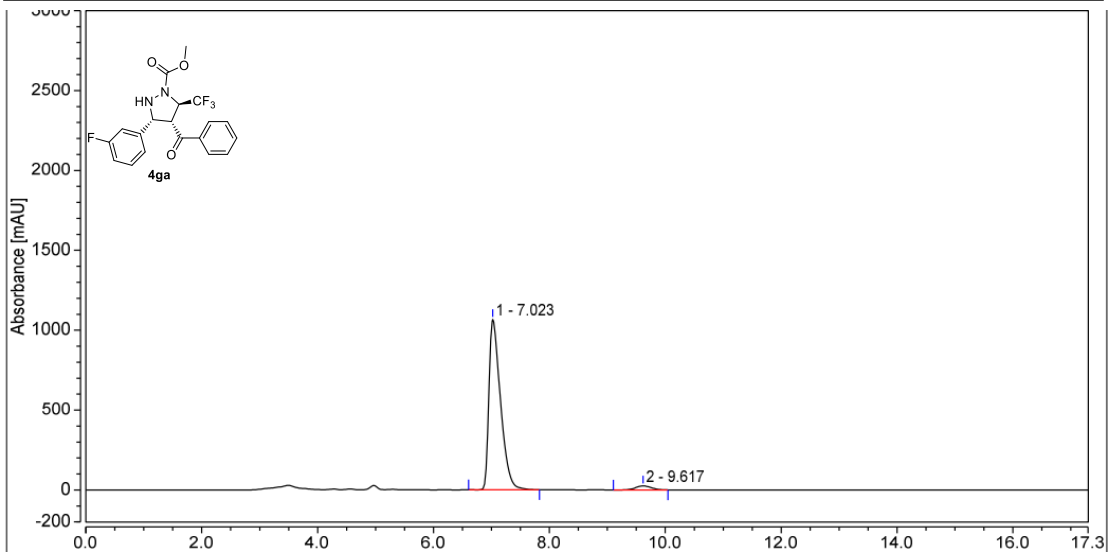

| Integration Results |           |                    |                |                 |                 |                   |        |
|---------------------|-----------|--------------------|----------------|-----------------|-----------------|-------------------|--------|
| No.                 | Peak Name | Retention Time min | Area mAU*min   | Height mAU      | Relative Area % | Relative Height % | Amount |
| 1                   |           | 7.023              | 247.366        | 1066.172        | 96.89           | 97.66             | n.a.   |
| 2                   |           | 9.617              | 7.951          | 25.541          | 3.11            | 2.34              | n.a.   |
| <b>Total:</b>       |           |                    | <b>255.317</b> | <b>1091.713</b> | <b>100.00</b>   | <b>100.00</b>     |        |



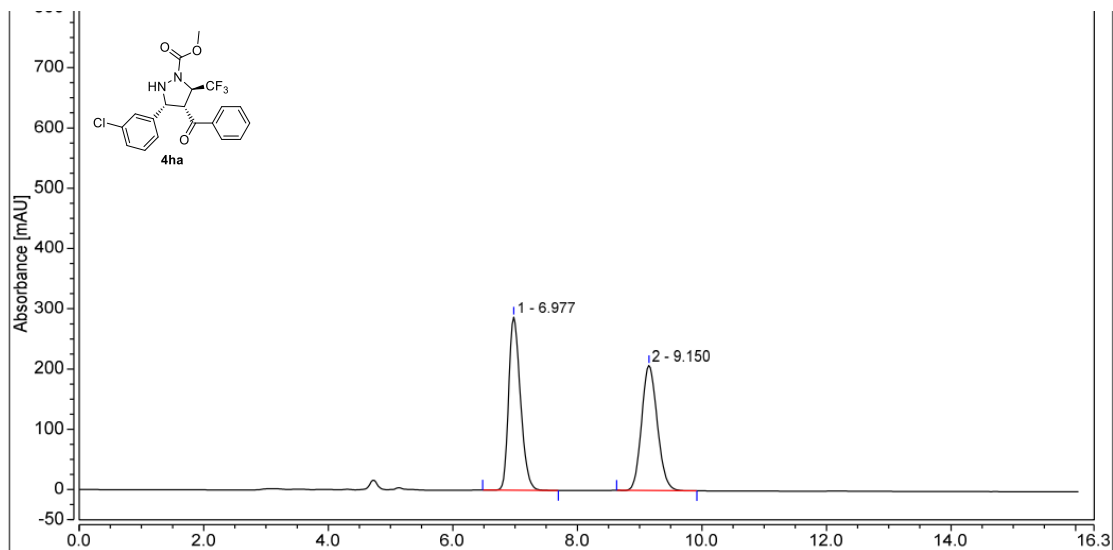

| Integration Results |           |                       |                 |                |                    |                      |                |
|---------------------|-----------|-----------------------|-----------------|----------------|--------------------|----------------------|----------------|
| No.                 | Peak Name | Retention Time<br>min | Area<br>mAU*min | Height<br>mAU  | Relative Area<br>% | Relative Height<br>% | Amount<br>n.a. |
| 1                   |           | 6.977                 | 62.910          | 287.144        | 50.88              | 58.08                | n.a.           |
| 2                   |           | 9.150                 | 60.722          | 207.252        | 49.12              | 41.92                | n.a.           |
| <b>Total:</b>       |           |                       | <b>123.632</b>  | <b>494.395</b> | <b>100.00</b>      | <b>100.00</b>        |                |

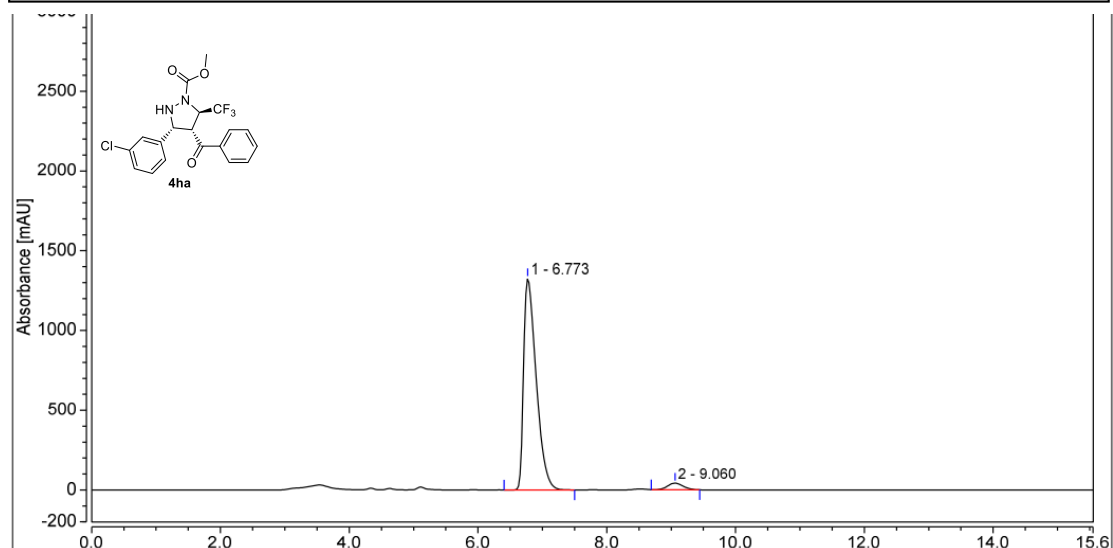

| Integration Results |           |                       |                 |                 |                    |                      |                |
|---------------------|-----------|-----------------------|-----------------|-----------------|--------------------|----------------------|----------------|
| No.                 | Peak Name | Retention Time<br>min | Area<br>mAU*min | Height<br>mAU   | Relative Area<br>% | Relative Height<br>% | Amount<br>n.a. |
| 1                   |           | 6.773                 | 299.584         | 1325.657        | 96.28              | 96.94                | n.a.           |
| 2                   |           | 9.060                 | 11.566          | 41.890          | 3.72               | 3.06                 | n.a.           |
| <b>Total:</b>       |           |                       | <b>311.150</b>  | <b>1367.547</b> | <b>100.00</b>      | <b>100.00</b>        |                |

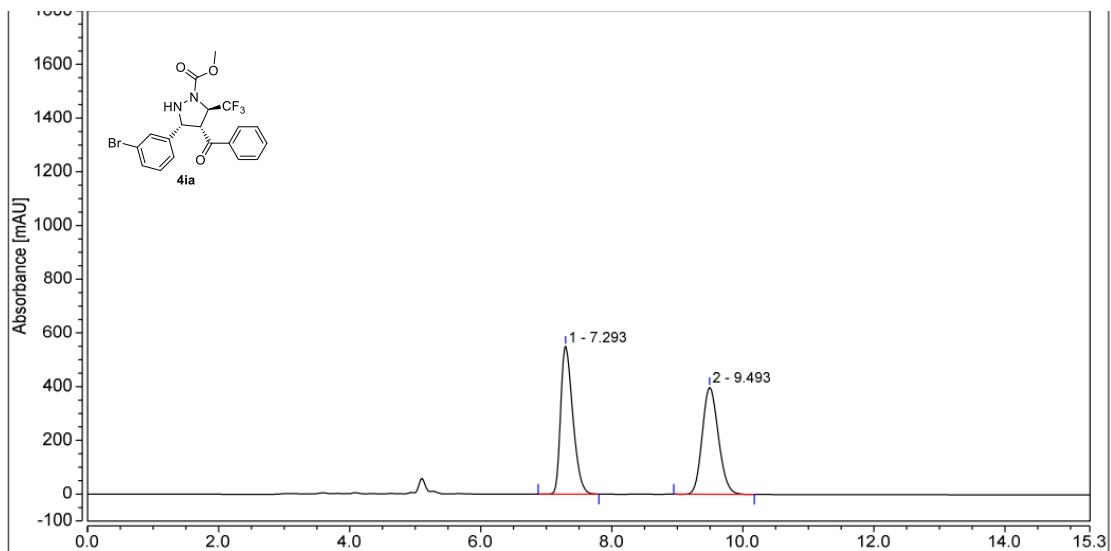

| Integration Results |           |                    |                |                |                 |                   |             |
|---------------------|-----------|--------------------|----------------|----------------|-----------------|-------------------|-------------|
| No.                 | Peak Name | Retention Time min | Area mAU*min   | Height mAU     | Relative Area % | Relative Height % | Amount n.a. |
| 1                   |           | 7.293              | 118.423        | 550.228        | 50.92           | 58.03             | n.a.        |
| 2                   |           | 9.493              | 114.140        | 397.967        | 49.08           | 41.97             | n.a.        |
| <b>Total:</b>       |           |                    | <b>232.563</b> | <b>948.195</b> | <b>100.00</b>   | <b>100.00</b>     |             |

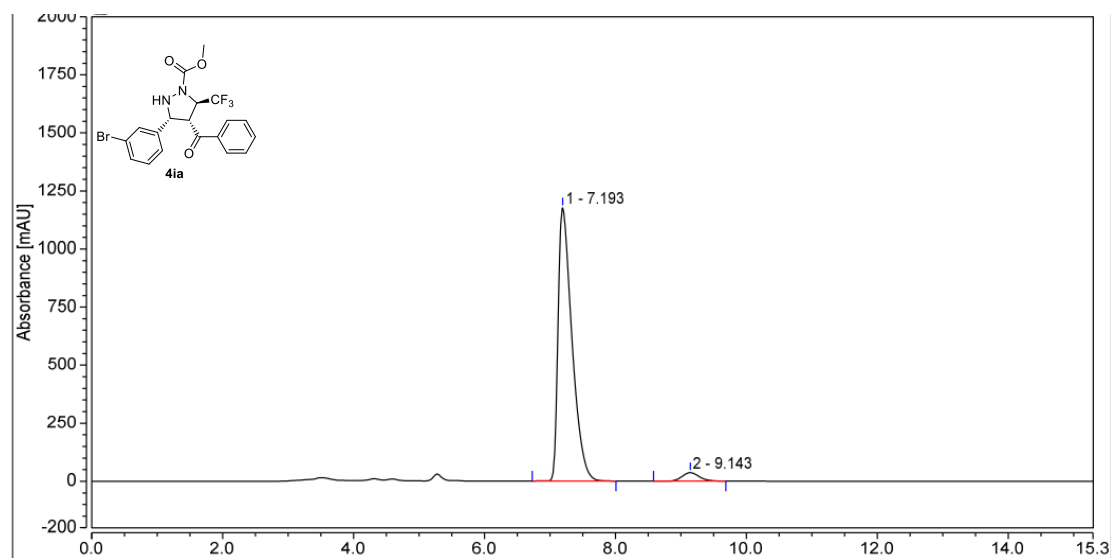

| Integration Results |           |                    |                |                 |                 |                   |             |
|---------------------|-----------|--------------------|----------------|-----------------|-----------------|-------------------|-------------|
| No.                 | Peak Name | Retention Time min | Area mAU*min   | Height mAU      | Relative Area % | Relative Height % | Amount n.a. |
| 1                   |           | 7.193              | 289.705        | 1176.226        | 96.31           | 96.97             | n.a.        |
| 2                   |           | 9.143              | 11.093         | 36.791          | 3.69            | 3.03              | n.a.        |
| <b>Total:</b>       |           |                    | <b>300.798</b> | <b>1213.017</b> | <b>100.00</b>   | <b>100.00</b>     |             |

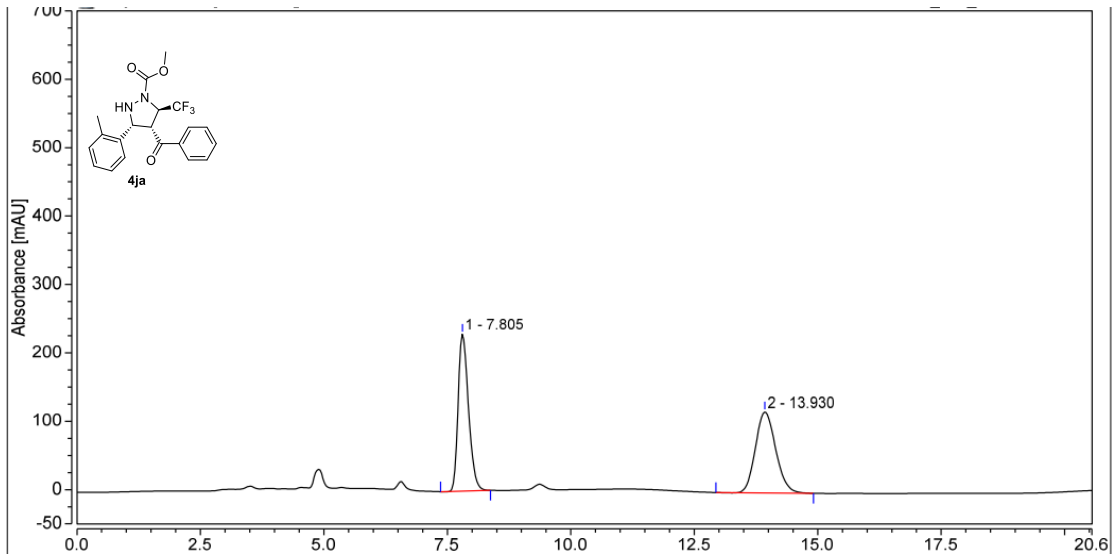

#### Integration Results

| No.           | Peak Name | Retention Time min | Area mAU*min   | Height mAU     | Relative Area % | Relative Height % | Amount |
|---------------|-----------|--------------------|----------------|----------------|-----------------|-------------------|--------|
| 1             |           | 7.805              | 55.731         | 229.521        | 49.73           | 65.96             | n.a.   |
| 2             |           | 13.930             | 56.344         | 118.443        | 50.27           | 34.04             | n.a.   |
| <b>Total:</b> |           |                    | <b>112.075</b> | <b>347.963</b> | <b>100.00</b>   | <b>100.00</b>     |        |

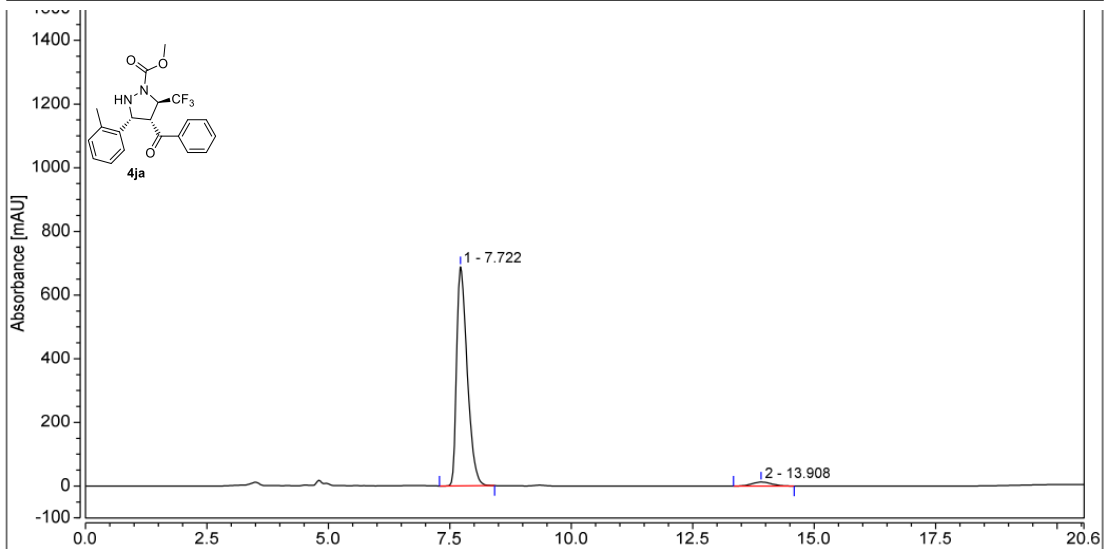

#### Integration Results

| No.           | Peak Name | Retention Time min | Area mAU*min   | Height mAU     | Relative Area % | Relative Height % | Amount |
|---------------|-----------|--------------------|----------------|----------------|-----------------|-------------------|--------|
| 1             |           | 7.722              | 174.584        | 688.534        | 96.73           | 98.22             | n.a.   |
| 2             |           | 13.908             | 5.900          | 12.507         | 3.27            | 1.78              | n.a.   |
| <b>Total:</b> |           |                    | <b>180.484</b> | <b>701.041</b> | <b>100.00</b>   | <b>100.00</b>     |        |

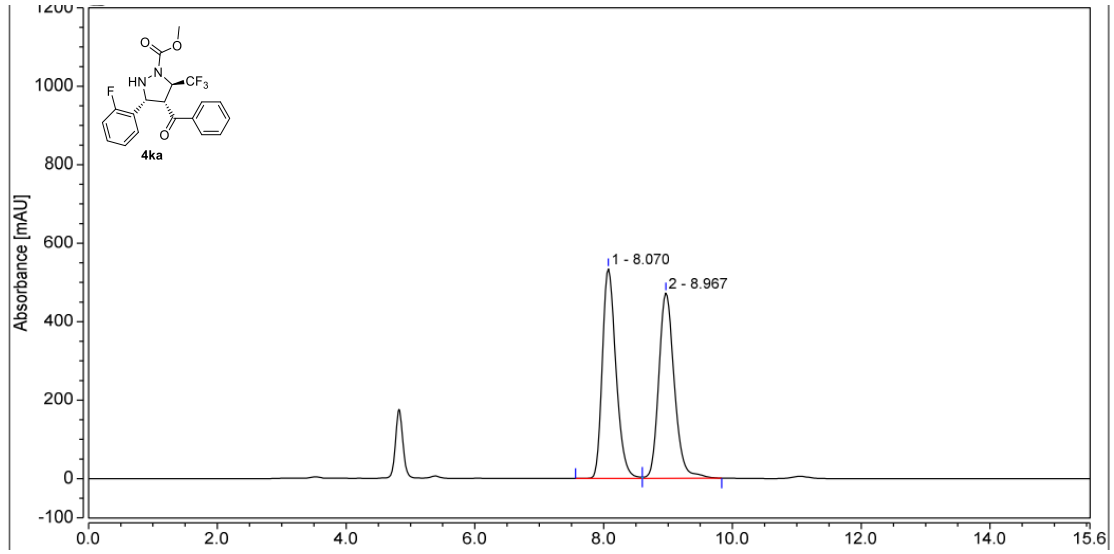

| Integration Results |           |                       |                 |                 |                    |                      |                |
|---------------------|-----------|-----------------------|-----------------|-----------------|--------------------|----------------------|----------------|
| No.                 | Peak Name | Retention Time<br>min | Area<br>mAU*min | Height<br>mAU   | Relative Area<br>% | Relative Height<br>% | Amount<br>n.a. |
| 1                   |           | 8.070                 | 131.073         | 534.381         | 49.80              | 53.07                | n.a.           |
| 2                   |           | 8.967                 | 132.114         | 472.588         | 50.20              | 46.93                | n.a.           |
| <b>Total:</b>       |           |                       | <b>263.187</b>  | <b>1006.969</b> | <b>100.00</b>      | <b>100.00</b>        |                |

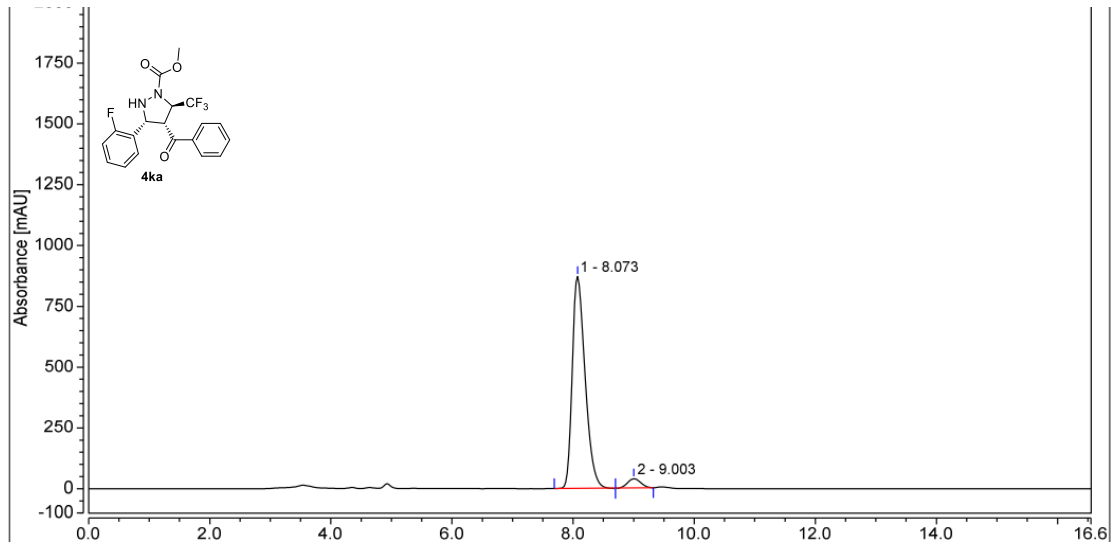

| Integration Results |           |                       |                 |                |                    |                      |                |
|---------------------|-----------|-----------------------|-----------------|----------------|--------------------|----------------------|----------------|
| No.                 | Peak Name | Retention Time<br>min | Area<br>mAU*min | Height<br>mAU  | Relative Area<br>% | Relative Height<br>% | Amount<br>n.a. |
| 1                   |           | 8.073                 | 215.295         | 871.805        | 95.89              | 95.86                | n.a.           |
| 2                   |           | 9.003                 | 9.230           | 37.640         | 4.11               | 4.14                 | n.a.           |
| <b>Total:</b>       |           |                       | <b>224.525</b>  | <b>909.445</b> | <b>100.00</b>      | <b>100.00</b>        |                |

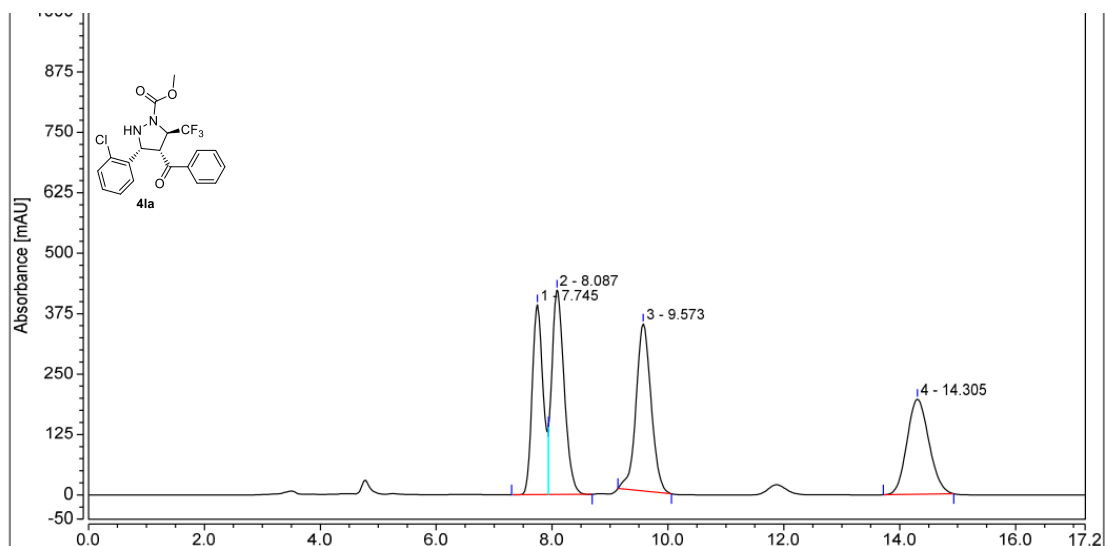

| Integration Results |           |                    |                |                 |                 |                   |             |
|---------------------|-----------|--------------------|----------------|-----------------|-----------------|-------------------|-------------|
| No.                 | Peak Name | Retention Time min | Area mAU*min   | Height mAU      | Relative Area % | Relative Height % | Amount n.a. |
| 1                   |           | 7.745              | 86.797         | 392.736         | 22.71           | 28.92             | n.a.        |
| 2                   |           | 8.087              | 104.436        | 422.984         | 27.32           | 31.15             | n.a.        |
| 3                   |           | 9.573              | 104.430        | 345.720         | 27.32           | 25.46             | n.a.        |
| 4                   |           | 14.305             | 86.539         | 196.646         | 22.64           | 14.48             | n.a.        |
| <b>Total:</b>       |           |                    | <b>382.202</b> | <b>1358.085</b> | <b>100.00</b>   | <b>100.00</b>     |             |

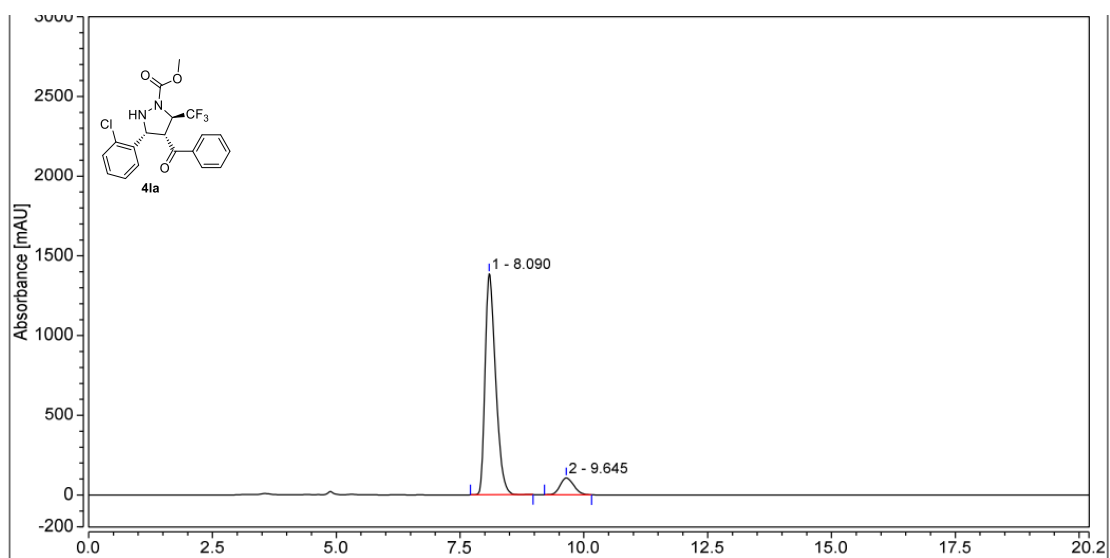

| Integration Results |           |                    |                |                 |                 |                   |             |
|---------------------|-----------|--------------------|----------------|-----------------|-----------------|-------------------|-------------|
| No.                 | Peak Name | Retention Time min | Area mAU*min   | Height mAU      | Relative Area % | Relative Height % | Amount n.a. |
| 1                   |           | 8.090              | 342.046        | 1386.789        | 90.96           | 92.88             | n.a.        |
| 2                   |           | 9.645              | 34.009         | 106.305         | 9.04            | 7.12              | n.a.        |
| <b>Total:</b>       |           |                    | <b>376.054</b> | <b>1493.094</b> | <b>100.00</b>   | <b>100.00</b>     |             |

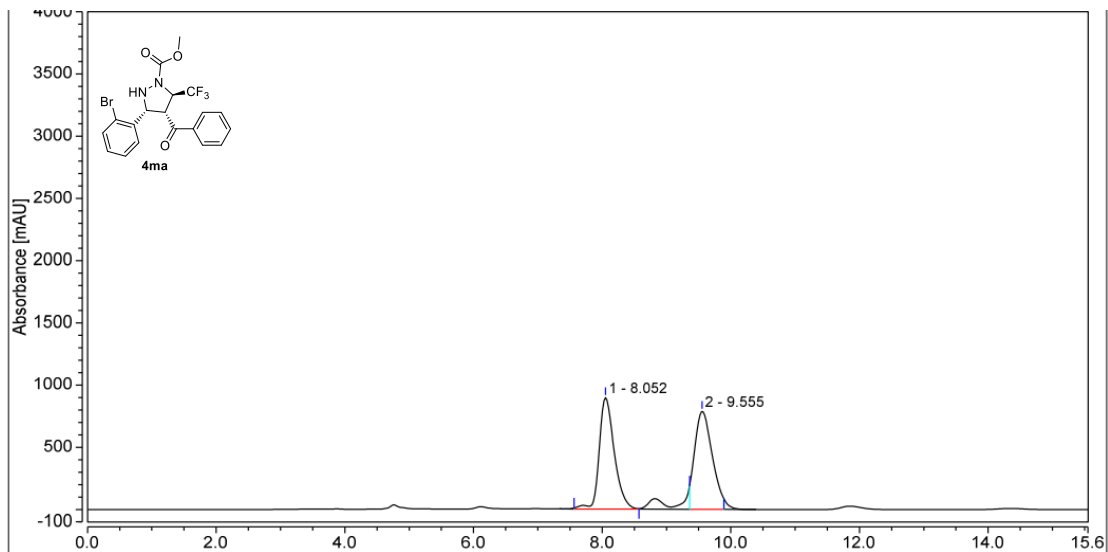

| Integration Results |           |                    |                |                 |                 |                   |        |
|---------------------|-----------|--------------------|----------------|-----------------|-----------------|-------------------|--------|
| No.                 | Peak Name | Retention Time min | Area mAU*min   | Height mAU      | Relative Area % | Relative Height % | Amount |
| 1                   |           | 8.052              | 242.617        | 895.631         | 49.52           | 53.19             | n.a.   |
| 2                   |           | 9.555              | 247.329        | 788.193         | 50.48           | 46.81             | n.a.   |
| <b>Total:</b>       |           |                    | <b>489.946</b> | <b>1683.823</b> | <b>100.00</b>   | <b>100.00</b>     |        |

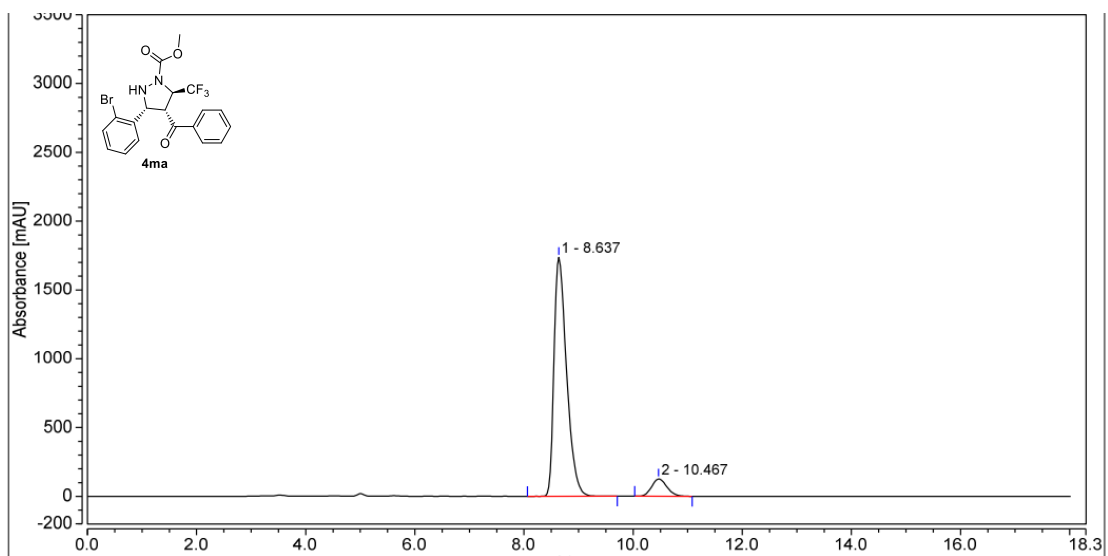

| Integration Results |           |                    |                |                 |                 |                   |        |
|---------------------|-----------|--------------------|----------------|-----------------|-----------------|-------------------|--------|
| No.                 | Peak Name | Retention Time min | Area mAU*min   | Height mAU      | Relative Area % | Relative Height % | Amount |
| 1                   |           | 8.637              | 463.999        | 1736.595        | 91.91           | 93.25             | n.a.   |
| 2                   |           | 10.467             | 40.834         | 125.761         | 8.09            | 6.75              | n.a.   |
| <b>Total:</b>       |           |                    | <b>504.834</b> | <b>1862.356</b> | <b>100.00</b>   | <b>100.00</b>     |        |

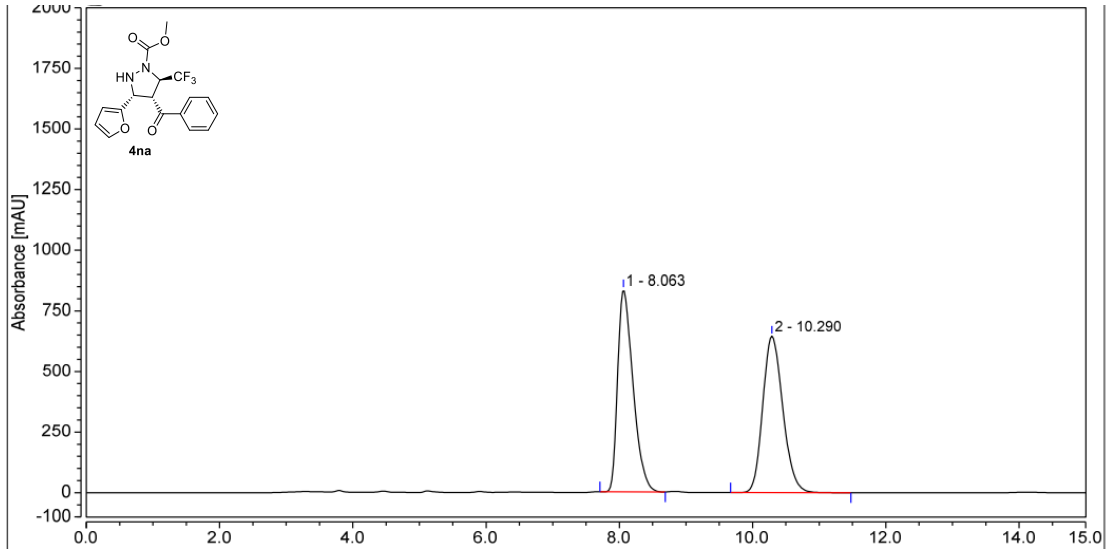

**Integration Results**

| No.           | Peak Name | Retention Time<br>min | Area<br>mAU*min | Height<br>mAU   | Relative Area<br>% | Relative Height<br>% | Amount<br>n.a. |
|---------------|-----------|-----------------------|-----------------|-----------------|--------------------|----------------------|----------------|
| 1             |           | 8.063                 | 222.750         | 833.192         | 49.69              | 56.33                | n.a.           |
| 2             |           | 10.290                | 225.559         | 645.973         | 50.31              | 43.67                | n.a.           |
| <b>Total:</b> |           |                       | <b>448.309</b>  | <b>1479.165</b> | <b>100.00</b>      | <b>100.00</b>        |                |

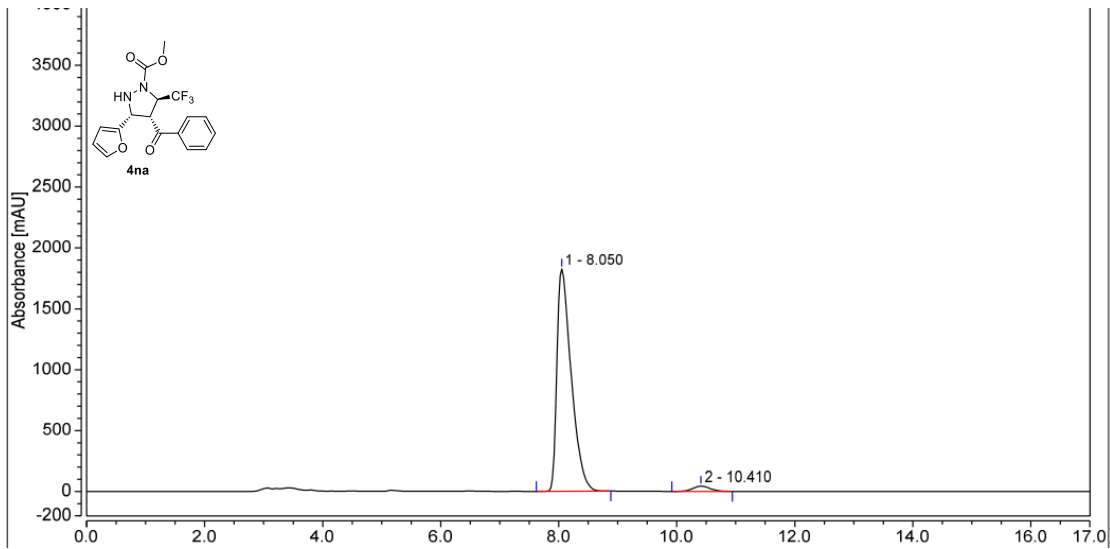

**Integration Results**

| No.           | Peak Name | Retention Time<br>min | Area<br>mAU*min | Height<br>mAU   | Relative Area<br>% | Relative Height<br>% | Amount<br>n.a. |
|---------------|-----------|-----------------------|-----------------|-----------------|--------------------|----------------------|----------------|
| 1             |           | 8.050                 | 513.193         | 1826.240        | 97.20              | 97.70                | n.a.           |
| 2             |           | 10.410                | 14.790          | 43.045          | 2.80               | 2.30                 | n.a.           |
| <b>Total:</b> |           |                       | <b>527.983</b>  | <b>1869.285</b> | <b>100.00</b>      | <b>100.00</b>        |                |

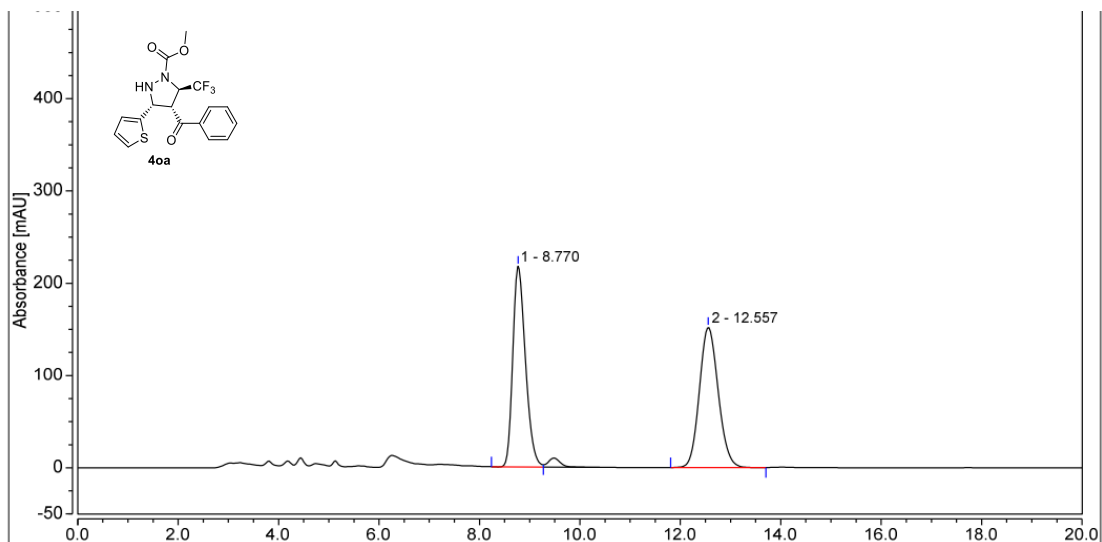

| Integration Results |           |                    |                |                |                 |                   |        |
|---------------------|-----------|--------------------|----------------|----------------|-----------------|-------------------|--------|
| No.                 | Peak Name | Retention Time min | Area mAU*min   | Height mAU     | Relative Area % | Relative Height % | Amount |
| 1                   |           | 8.770              | 63.220         | 217.516        | 49.00           | 58.87             | n.a.   |
| 2                   |           | 12.557             | 65.803         | 151.939        | 51.00           | 41.13             | n.a.   |
| <b>Total:</b>       |           |                    | <b>129.023</b> | <b>369.455</b> | <b>100.00</b>   | <b>100.00</b>     |        |

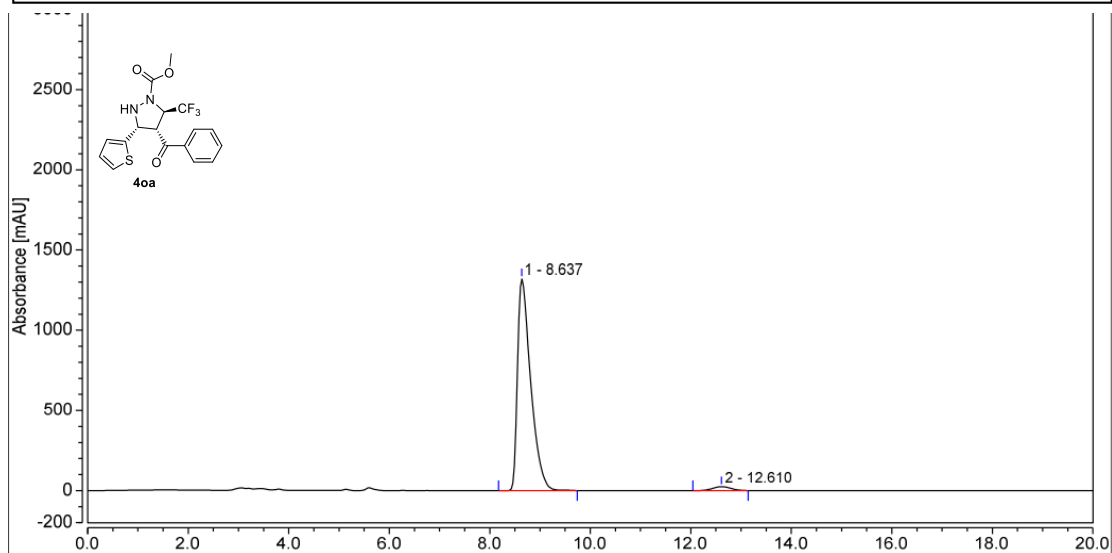

| Integration Results |           |                    |                |                 |                 |                   |        |
|---------------------|-----------|--------------------|----------------|-----------------|-----------------|-------------------|--------|
| No.                 | Peak Name | Retention Time min | Area mAU*min   | Height mAU      | Relative Area % | Relative Height % | Amount |
| 1                   |           | 8.637              | 401.531        | 1320.163        | 97.48           | 98.17             | n.a.   |
| 2                   |           | 12.610             | 10.367         | 24.555          | 2.52            | 1.83              | n.a.   |
| <b>Total:</b>       |           |                    | <b>411.898</b> | <b>1344.718</b> | <b>100.00</b>   | <b>100.00</b>     |        |



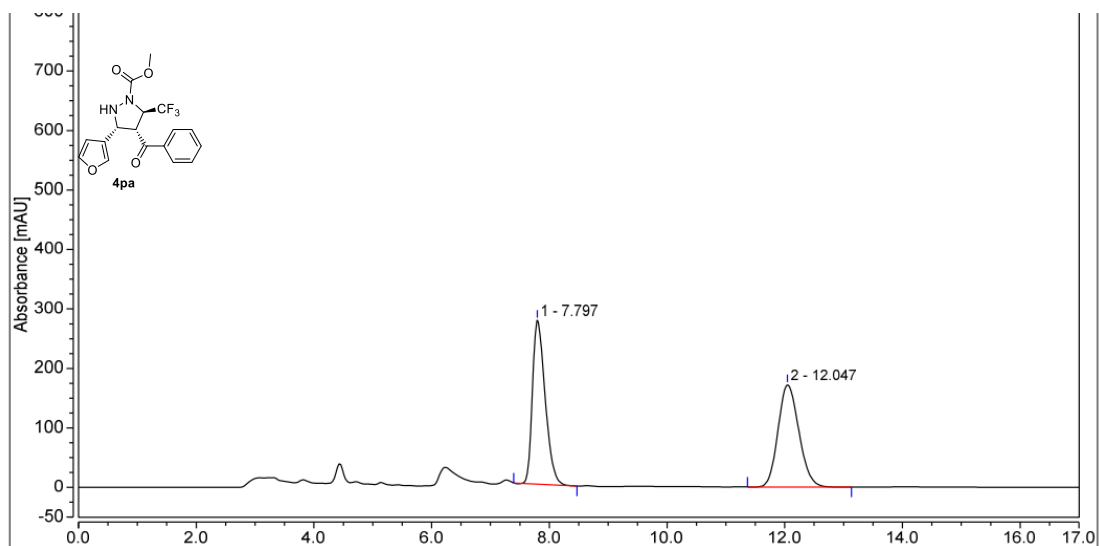

| Integration Results |           |                    |                |                |                 |                   |        |
|---------------------|-----------|--------------------|----------------|----------------|-----------------|-------------------|--------|
| No.                 | Peak Name | Retention Time min | Area mAU*min   | Height mAU     | Relative Area % | Relative Height % | Amount |
| 1                   |           | 7.797              | 68.889         | 275.801        | 49.41           | 61.58             | n.a.   |
| 2                   |           | 12.047             | 70.531         | 172.055        | 50.59           | 38.42             | n.a.   |
| <b>Total:</b>       |           |                    | <b>139.420</b> | <b>447.855</b> | <b>100.00</b>   | <b>100.00</b>     |        |

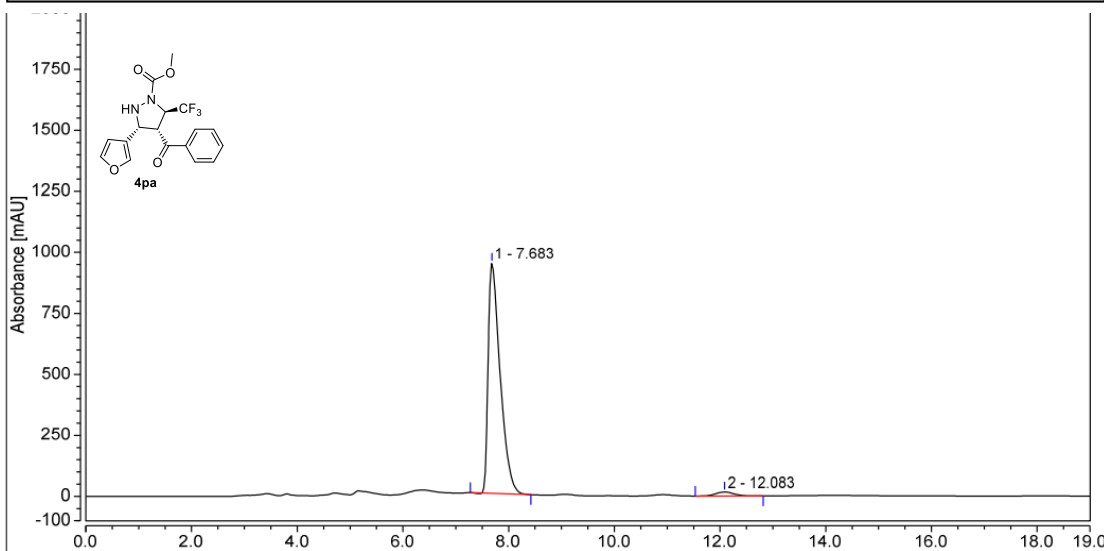

| Integration Results |           |                    |                |                |                 |                   |        |
|---------------------|-----------|--------------------|----------------|----------------|-----------------|-------------------|--------|
| No.                 | Peak Name | Retention Time min | Area mAU*min   | Height mAU     | Relative Area % | Relative Height % | Amount |
| 1                   |           | 7.683              | 246.482        | 943.520        | 97.40           | 98.31             | n.a.   |
| 2                   |           | 12.083             | 6.580          | 16.185         | 2.60            | 1.69              | n.a.   |
| <b>Total:</b>       |           |                    | <b>253.062</b> | <b>959.705</b> | <b>100.00</b>   | <b>100.00</b>     |        |

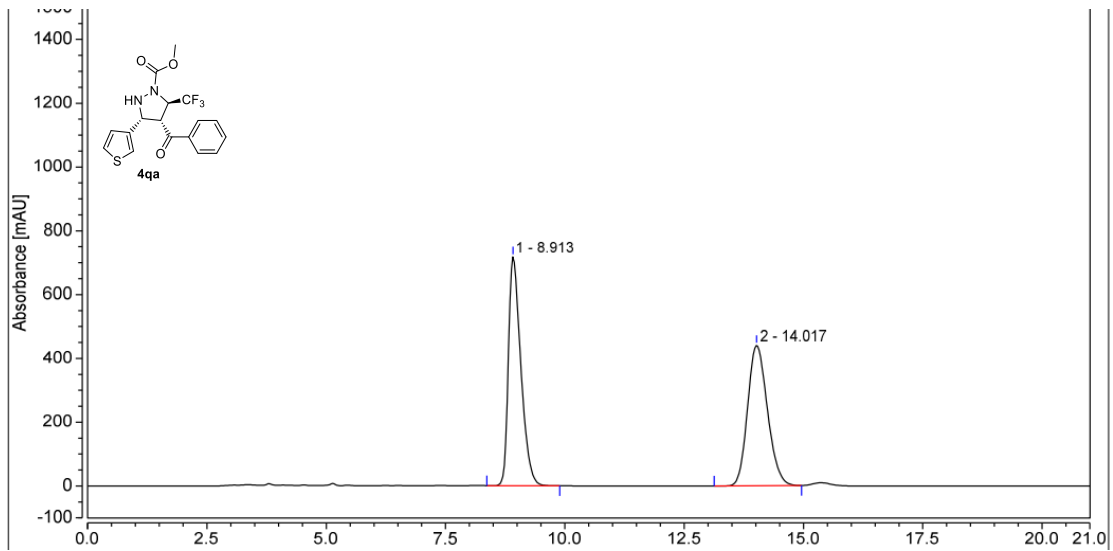

| Integration Results |           |                    |                |                 |                 |                   |        |
|---------------------|-----------|--------------------|----------------|-----------------|-----------------|-------------------|--------|
| No.                 | Peak Name | Retention Time min | Area mAU*min   | Height mAU      | Relative Area % | Relative Height % | Amount |
| 1                   |           | 8.913              | 216.370        | 717.730         | 50.50           | 61.99             | n.a.   |
| 2                   |           | 14.017             | 212.120        | 440.178         | 49.50           | 38.01             | n.a.   |
| <b>Total:</b>       |           |                    | <b>428.489</b> | <b>1157.908</b> | <b>100.00</b>   | <b>100.00</b>     |        |

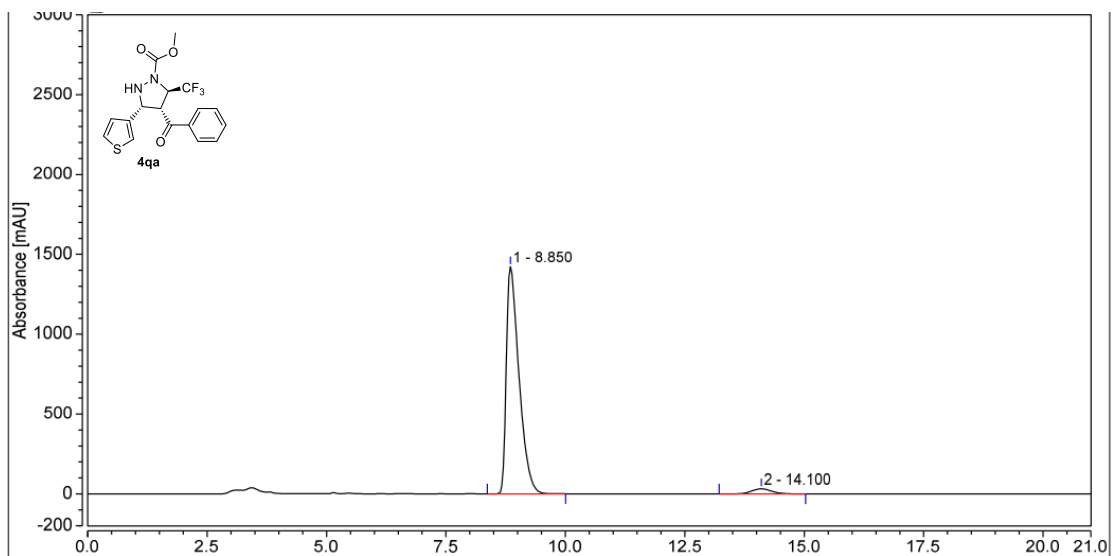

| Integration Results |           |                    |                |                 |                 |                   |        |
|---------------------|-----------|--------------------|----------------|-----------------|-----------------|-------------------|--------|
| No.                 | Peak Name | Retention Time min | Area mAU*min   | Height mAU      | Relative Area % | Relative Height % | Amount |
| 1                   |           | 8.850              | 437.129        | 1421.702        | 96.61           | 97.81             | n.a.   |
| 2                   |           | 14.100             | 15.326         | 31.809          | 3.39            | 2.19              | n.a.   |
| <b>Total:</b>       |           |                    | <b>452.455</b> | <b>1453.511</b> | <b>100.00</b>   | <b>100.00</b>     |        |

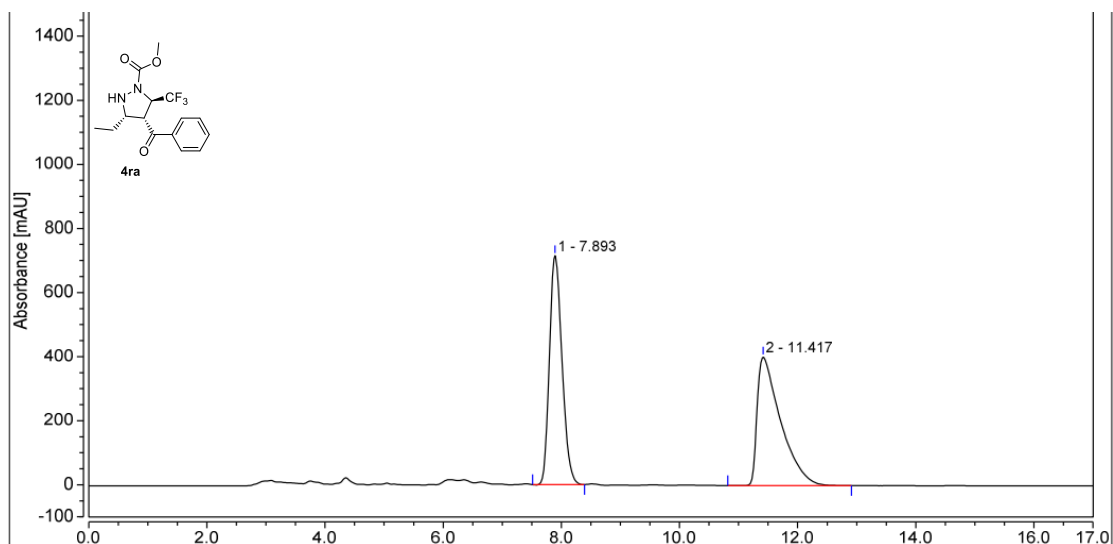

| Integration Results |           |                    |                |                 |                 |                   |        |
|---------------------|-----------|--------------------|----------------|-----------------|-----------------|-------------------|--------|
| No.                 | Peak Name | Retention Time min | Area mAU*min   | Height mAU      | Relative Area % | Relative Height % | Amount |
| 1                   |           | 7.893              | 176.323        | 714.424         | 48.86           | 64.02             | n.a.   |
| 2                   |           | 11.417             | 184.533        | 401.461         | 51.14           | 35.98             | n.a.   |
| <b>Total:</b>       |           |                    | <b>360.857</b> | <b>1115.886</b> | <b>100.00</b>   | <b>100.00</b>     |        |

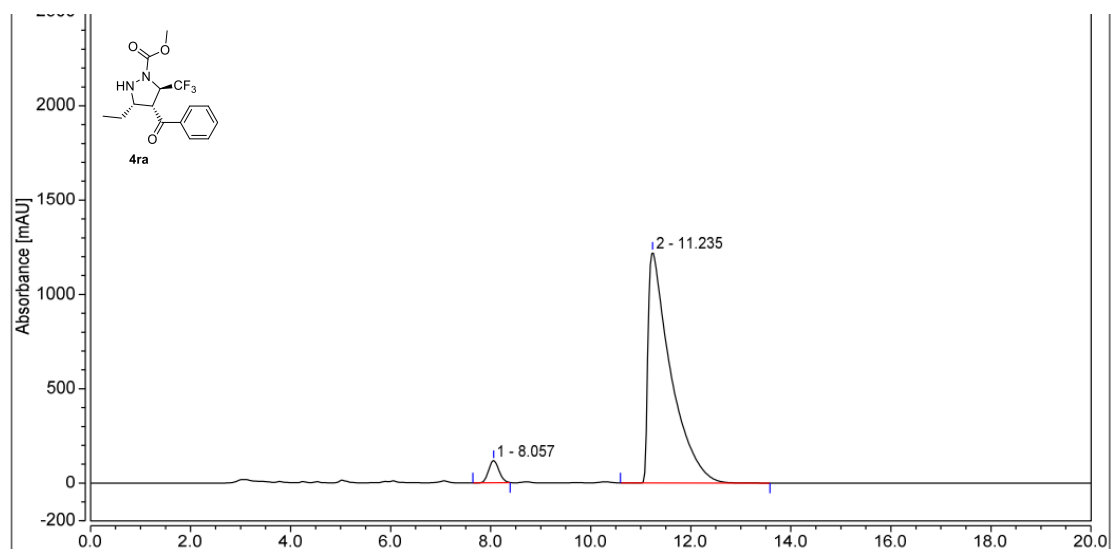

| Integration Results |           |                    |                |                 |                 |                   |        |
|---------------------|-----------|--------------------|----------------|-----------------|-----------------|-------------------|--------|
| No.                 | Peak Name | Retention Time min | Area mAU*min   | Height mAU      | Relative Area % | Relative Height % | Amount |
| 1                   |           | 8.057              | 28.099         | 117.466         | 4.21            | 8.76              | n.a.   |
| 2                   |           | 11.235             | 639.291        | 1223.268        | 95.79           | 91.24             | n.a.   |
| <b>Total:</b>       |           |                    | <b>667.390</b> | <b>1340.735</b> | <b>100.00</b>   | <b>100.00</b>     |        |

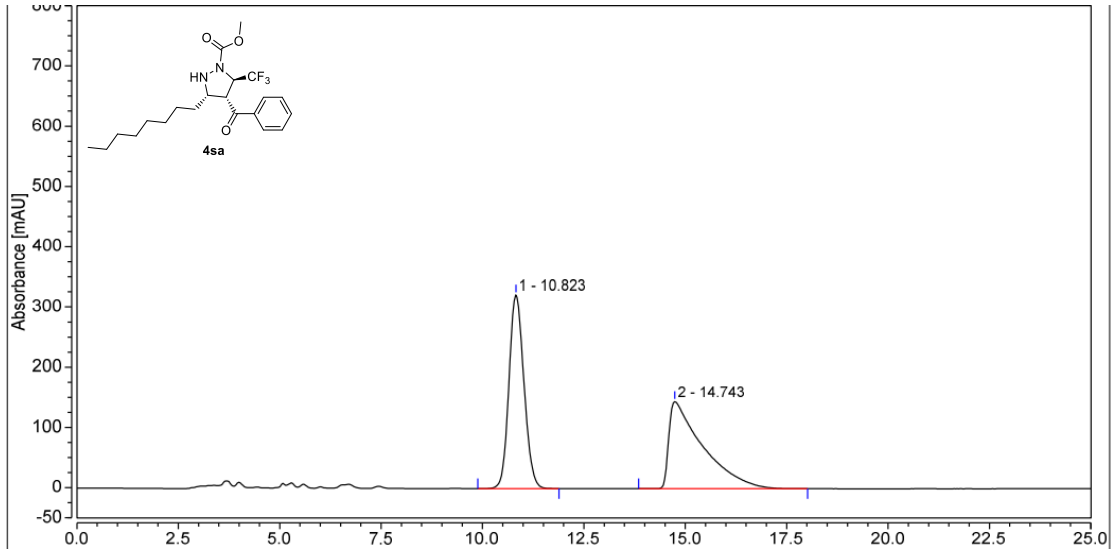

#### Integration Results

| No.           | Peak Name | Retention Time<br>min | Area<br>mAU*min | Height<br>mAU  | Relative Area<br>% | Relative Height<br>% | Amount |
|---------------|-----------|-----------------------|-----------------|----------------|--------------------|----------------------|--------|
| 1             |           | 10.823                | 138.110         | 321.588        | 49.68              | 68.96                | n.a.   |
| 2             |           | 14.743                | 139.904         | 144.731        | 50.32              | 31.04                | n.a.   |
| <b>Total:</b> |           |                       | <b>278.014</b>  | <b>466.319</b> | <b>100.00</b>      | <b>100.00</b>        |        |

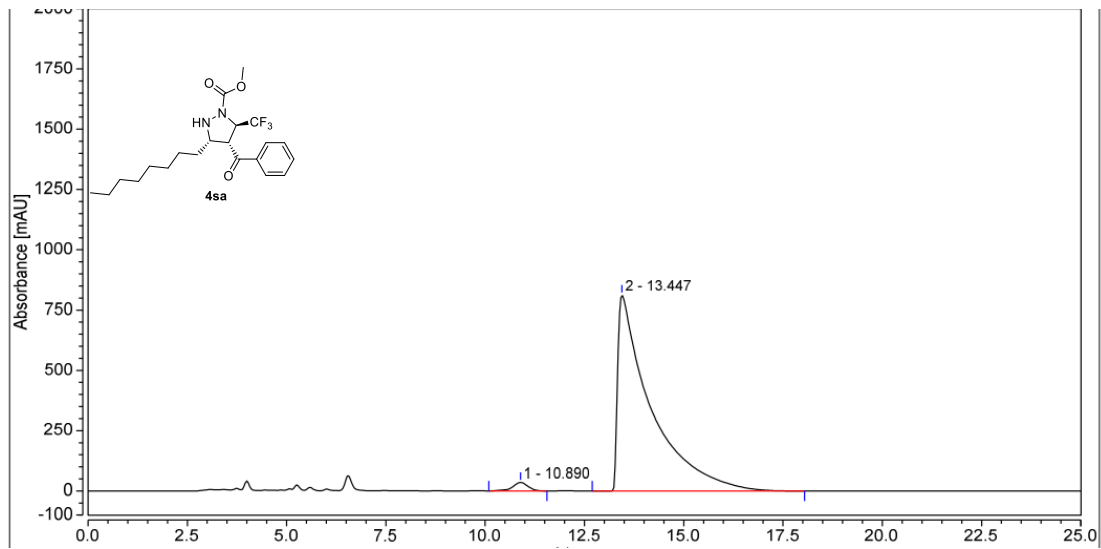

#### Integration Results

| No.           | Peak Name | Retention Time<br>min | Area<br>mAU*min | Height<br>mAU  | Relative Area<br>% | Relative Height<br>% | Amount |
|---------------|-----------|-----------------------|-----------------|----------------|--------------------|----------------------|--------|
| 1             |           | 10.890                | 15.713          | 34.954         | 1.97               | 4.13                 | n.a.   |
| 2             |           | 13.447                | 781.597         | 811.956        | 98.03              | 95.87                | n.a.   |
| <b>Total:</b> |           |                       | <b>797.310</b>  | <b>846.910</b> | <b>100.00</b>      | <b>100.00</b>        |        |

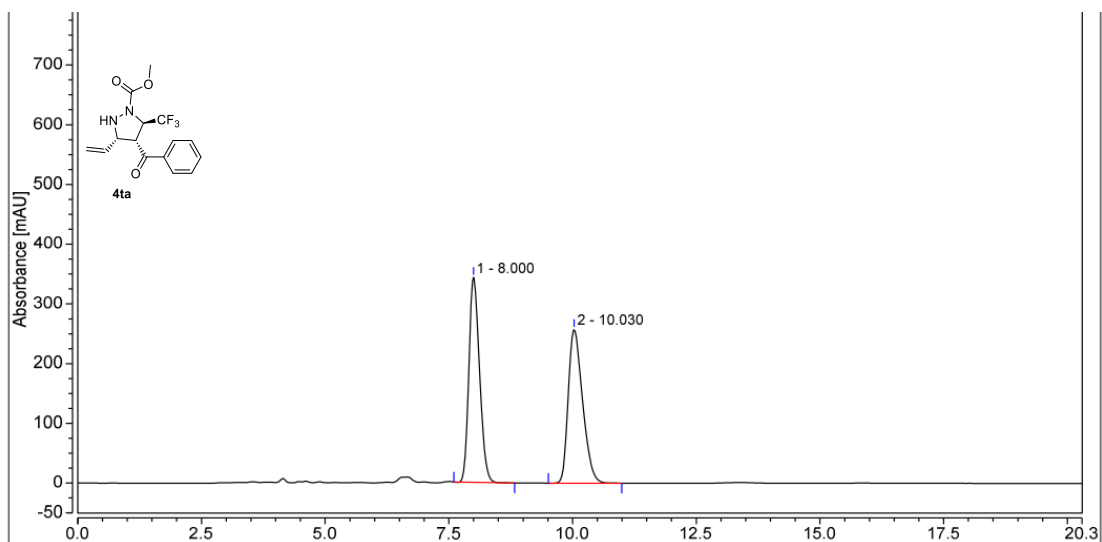

| Integration Results |           |                    |                |                |                 |                   |        |
|---------------------|-----------|--------------------|----------------|----------------|-----------------|-------------------|--------|
| No.                 | Peak Name | Retention Time min | Area mAU*min   | Height mAU     | Relative Area % | Relative Height % | Amount |
| 1                   |           | 8.000              | 85.631         | 343.187        | 49.78           | 57.13             | n.a.   |
| 2                   |           | 10.030             | 86.396         | 257.524        | 50.22           | 42.87             | n.a.   |
| <b>Total:</b>       |           |                    | <b>172.026</b> | <b>600.711</b> | <b>100.00</b>   | <b>100.00</b>     |        |

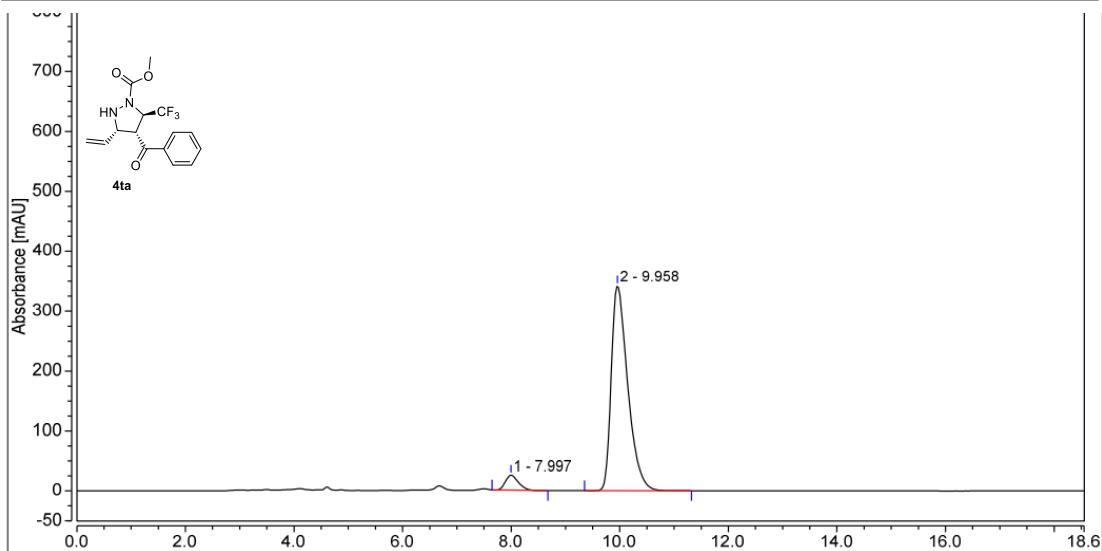

| Integration Results |           |                    |                |                |                 |                   |        |
|---------------------|-----------|--------------------|----------------|----------------|-----------------|-------------------|--------|
| No.                 | Peak Name | Retention Time min | Area mAU*min   | Height mAU     | Relative Area % | Relative Height % | Amount |
| 1                   |           | 7.997              | 6.856          | 25.008         | 5.39            | 6.81              | n.a.   |
| 2                   |           | 9.958              | 120.323        | 341.949        | 94.61           | 93.19             | n.a.   |
| <b>Total:</b>       |           |                    | <b>127.179</b> | <b>366.957</b> | <b>100.00</b>   | <b>100.00</b>     |        |

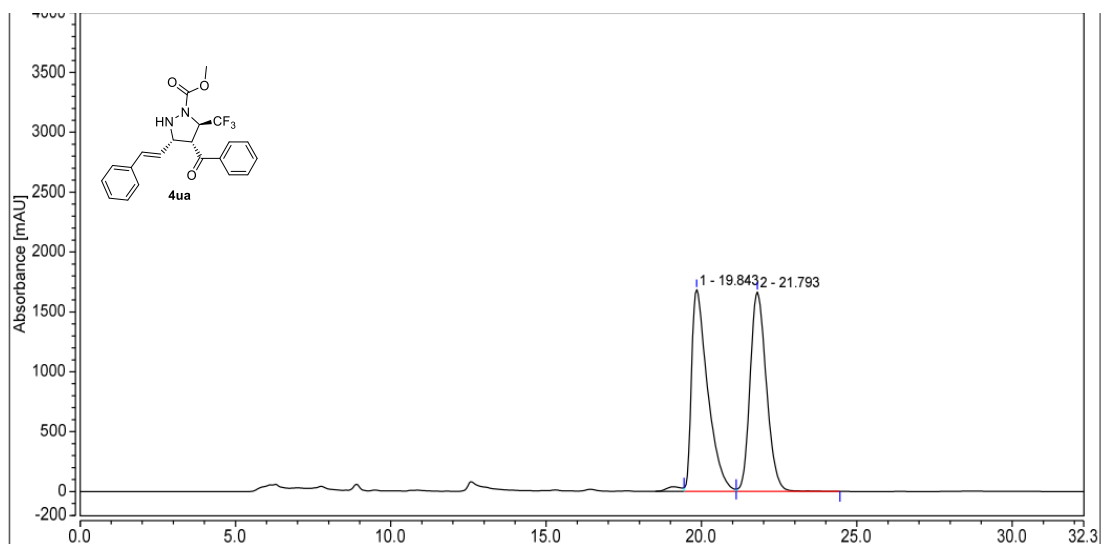

| Integration Results |           |                    |                 |                 |                 |                   |        |
|---------------------|-----------|--------------------|-----------------|-----------------|-----------------|-------------------|--------|
| No.                 | Peak Name | Retention Time min | Area mAU*min    | Height mAU      | Relative Area % | Relative Height % | Amount |
| 1                   |           | 19.843             | 1013.327        | 1685.344        | 50.04           | 50.32             | n.a.   |
| 2                   |           | 21.793             | 1011.797        | 1663.623        | 49.96           | 49.68             | n.a.   |
| <b>Total:</b>       |           |                    | <b>2025.124</b> | <b>3348.967</b> | <b>100.00</b>   | <b>100.00</b>     |        |

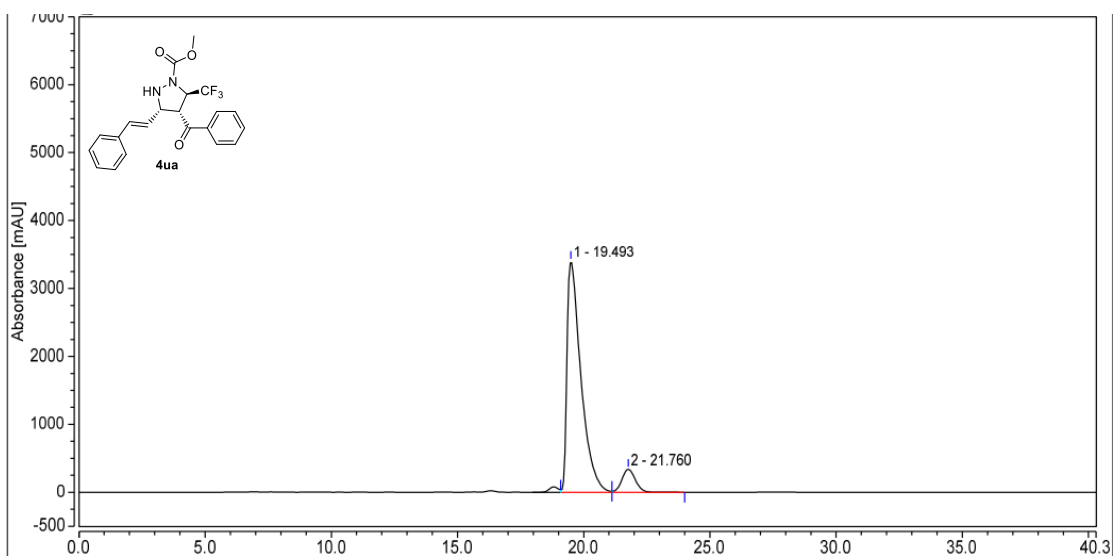

| Integration Results |           |                    |                 |                 |                 |                   |        |
|---------------------|-----------|--------------------|-----------------|-----------------|-----------------|-------------------|--------|
| No.                 | Peak Name | Retention Time min | Area mAU*min    | Height mAU      | Relative Area % | Relative Height % | Amount |
| 1                   |           | 19.493             | 2171.594        | 3397.164        | 91.16           | 90.95             | n.a.   |
| 2                   |           | 21.760             | 210.521         | 338.028         | 8.84            | 9.05              | n.a.   |
| <b>Total:</b>       |           |                    | <b>2382.115</b> | <b>3735.192</b> | <b>100.00</b>   | <b>100.00</b>     |        |

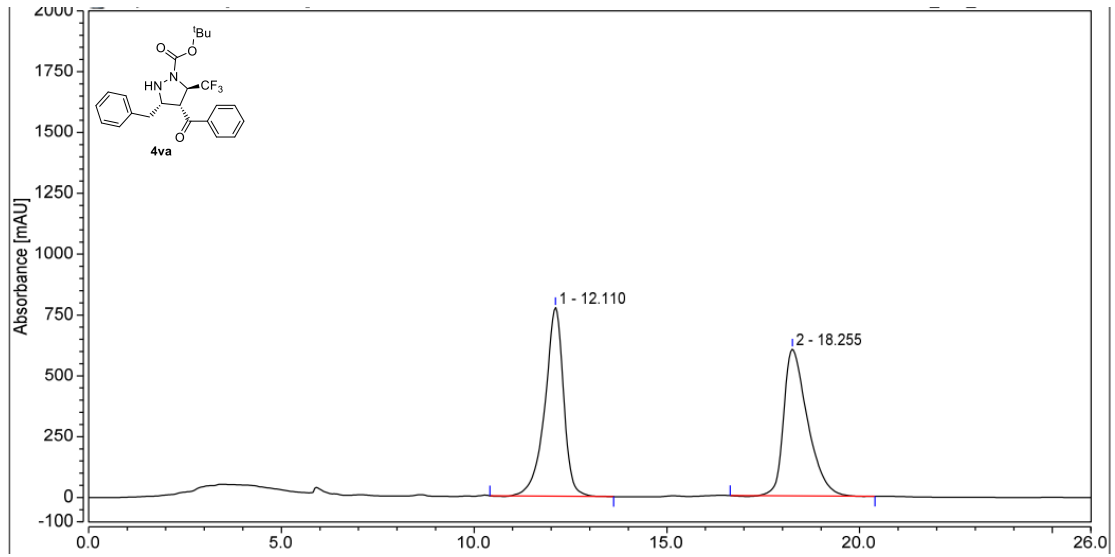

#### Integration Results

| No.           | Peak Name | Retention Time<br>min | Area<br>mAU*min | Height<br>mAU   | Relative Area<br>% | Relative Height<br>% | Amount |
|---------------|-----------|-----------------------|-----------------|-----------------|--------------------|----------------------|--------|
| 1             |           | 12.110                | 436.011         | 775.523         | 50.24              | 56.24                | n.a.   |
| 2             |           | 18.255                | 431.778         | 603.376         | 49.76              | 43.76                | n.a.   |
| <b>Total:</b> |           |                       | <b>867.788</b>  | <b>1378.899</b> | <b>100.00</b>      | <b>100.00</b>        |        |

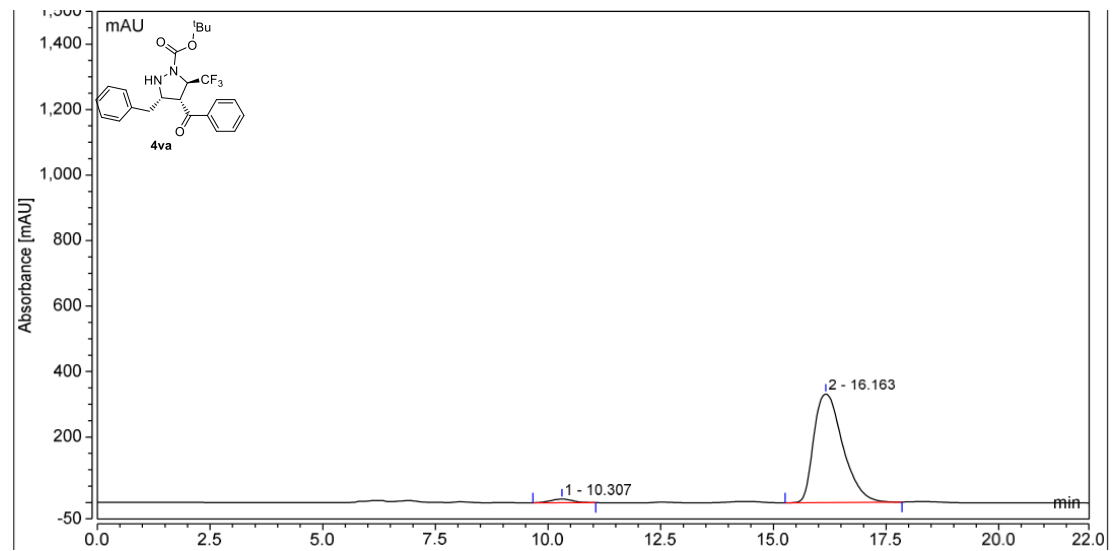

#### Integration Results

| No.           | Peak Name | Retention Time<br>min | Area<br>mAU*min | Height<br>mAU  | Relative Area<br>% | Relative Height<br>% | Amount |
|---------------|-----------|-----------------------|-----------------|----------------|--------------------|----------------------|--------|
| 1             |           | 10.307                | 6.235           | 11.077         | 2.46               | 3.24                 | n.a.   |
| 2             |           | 16.163                | 247.464         | 331.312        | 97.54              | 96.76                | n.a.   |
| <b>Total:</b> |           |                       | <b>253.700</b>  | <b>342.389</b> | <b>100.00</b>      | <b>100.00</b>        |        |

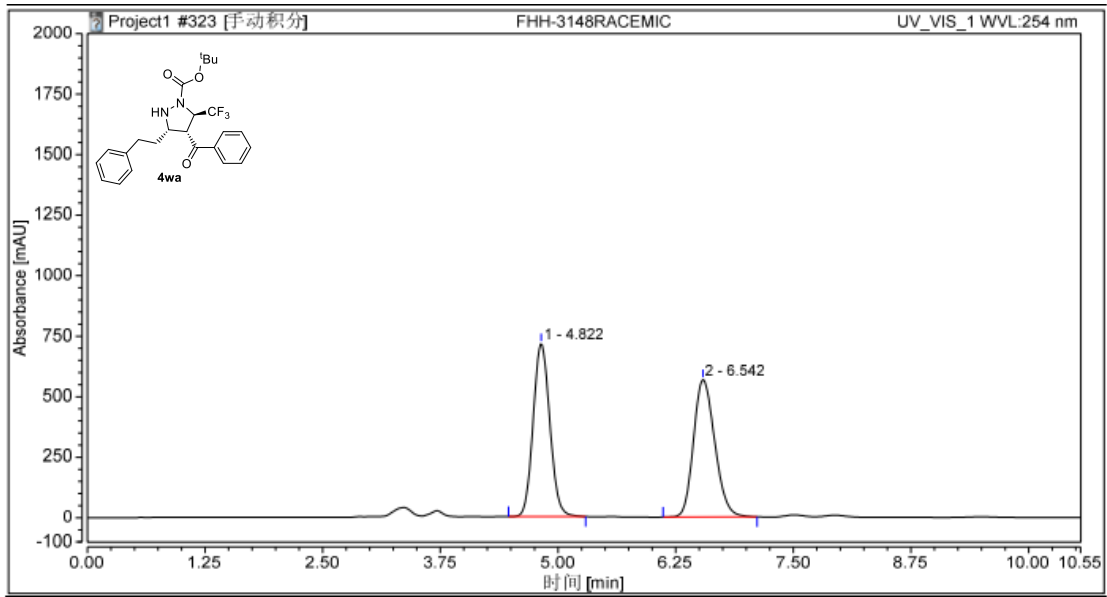

| Integration Results |           |                    |                |                 |                 |                   |             |
|---------------------|-----------|--------------------|----------------|-----------------|-----------------|-------------------|-------------|
| No.                 | Peak Name | Retention Time min | Area mAU*min   | Height mAU      | Relative Area % | Relative Height % | Amount n.a. |
| 1                   |           | 4.822              | 147.014        | 714.181         | 49.67           | 55.71             | n.a.        |
| 2                   |           | 6.542              | 148.986        | 567.877         | 50.33           | 44.29             | n.a.        |
| <b>Total:</b>       |           |                    | <b>296.000</b> | <b>1282.058</b> | <b>100.00</b>   | <b>100.00</b>     |             |

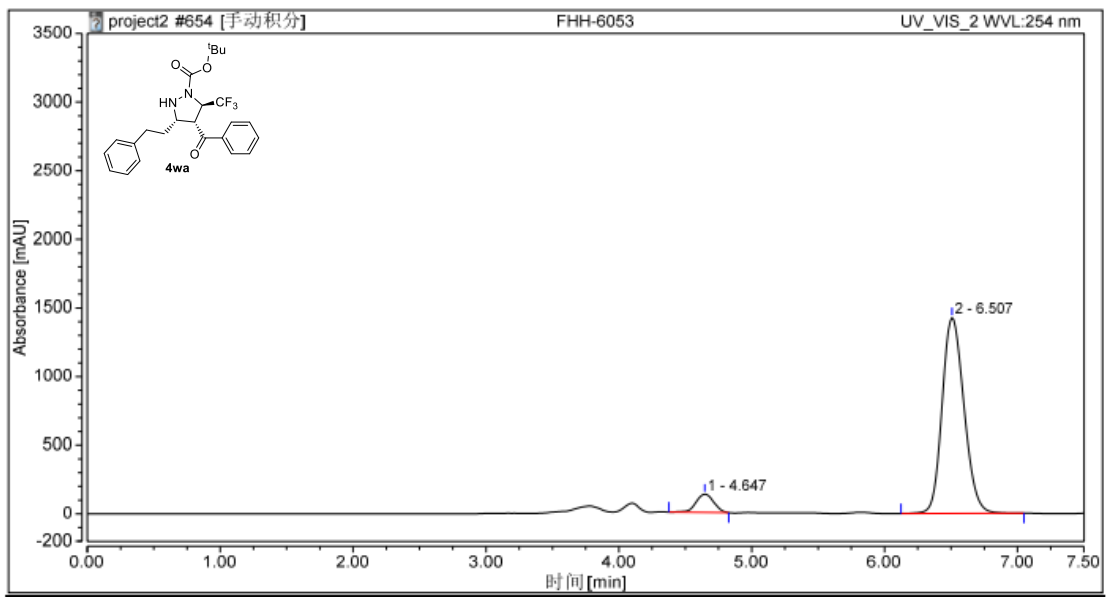

| Integration Results |           |                    |                |                 |                 |                   |             |
|---------------------|-----------|--------------------|----------------|-----------------|-----------------|-------------------|-------------|
| No.                 | Peak Name | Retention Time min | Area mAU*min   | Height mAU      | Relative Area % | Relative Height % | Amount n.a. |
| 1                   |           | 4.647              | 20.714         | 133.587         | 7.11            | 8.56              | n.a.        |
| 2                   |           | 6.507              | 270.475        | 1426.269        | 92.89           | 91.44             | n.a.        |
| <b>Total:</b>       |           |                    | <b>291.189</b> | <b>1559.855</b> | <b>100.00</b>   | <b>100.00</b>     |             |



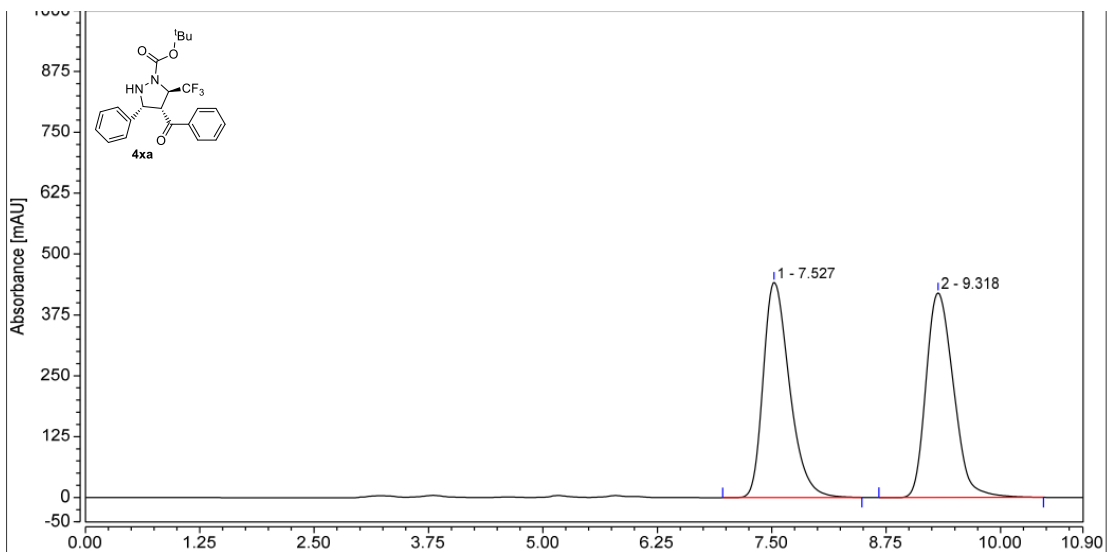

**Integration Results**

| No.           | Peak Name | Retention Time<br>min | Area<br>mAU*min | Height<br>mAU  | Relative Area<br>% | Relative Height<br>% | Amount |
|---------------|-----------|-----------------------|-----------------|----------------|--------------------|----------------------|--------|
| 1             |           | 7.527                 | 146.452         | 442.241        | 50.01              | 51.26                | n.a.   |
| 2             |           | 9.318                 | 146.375         | 420.491        | 49.99              | 48.74                | n.a.   |
| <b>Total:</b> |           |                       | <b>292.827</b>  | <b>862.732</b> | <b>100.00</b>      | <b>100.00</b>        |        |

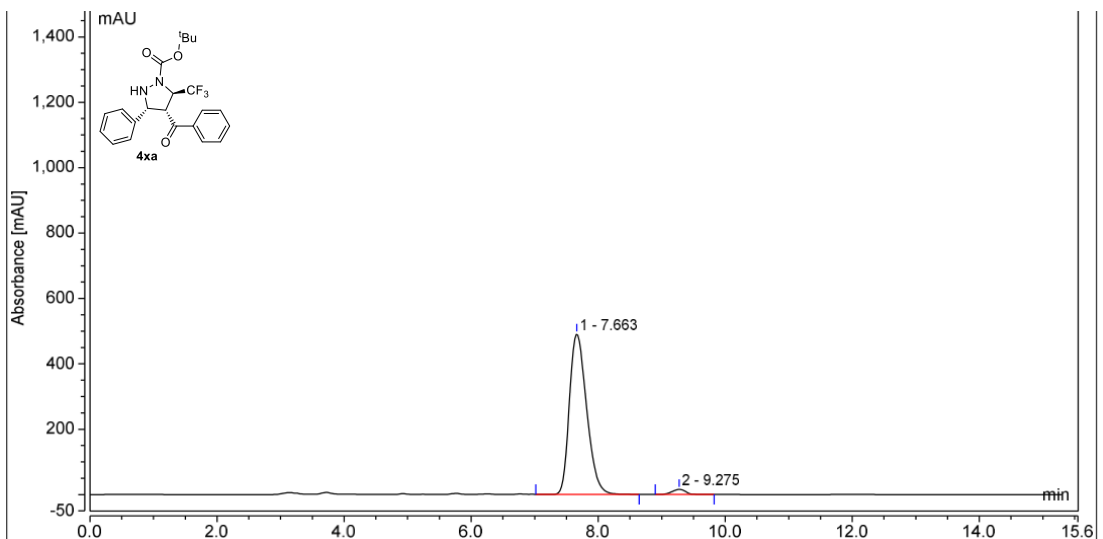

**Integration Results**

| No.           | Peak Name | Retention Time<br>min | Area<br>mAU*min | Height<br>mAU  | Relative Area<br>% | Relative Height<br>% | Amount |
|---------------|-----------|-----------------------|-----------------|----------------|--------------------|----------------------|--------|
| 1             |           | 7.663                 | 154.417         | 490.769        | 97.50              | 96.92                | n.a.   |
| 2             |           | 9.275                 | 3.960           | 15.584         | 2.50               | 3.08                 | n.a.   |
| <b>Total:</b> |           |                       | <b>158.377</b>  | <b>506.353</b> | <b>100.00</b>      | <b>100.00</b>        |        |

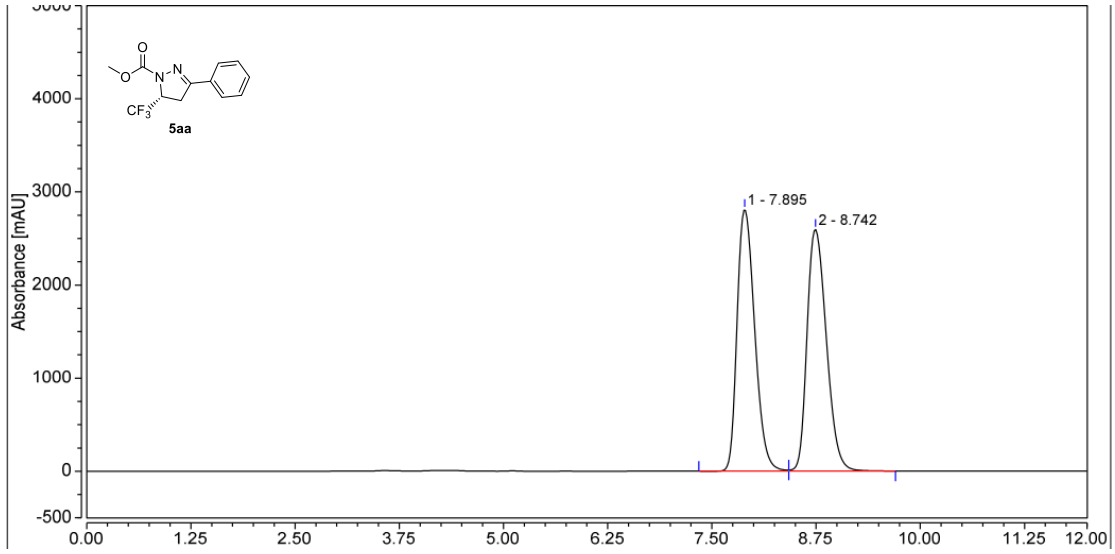

#### Integration Results

| No.           | Peak Name | Retention Time<br>min | Area<br>mAU*min | Height<br>mAU   | Relative Area<br>% | Relative Height<br>% | Amount<br>n.a. |
|---------------|-----------|-----------------------|-----------------|-----------------|--------------------|----------------------|----------------|
| 1             |           | 7.895                 | 688.247         | 2810.642        | 49.72              | 51.97                | n.a.           |
| 2             |           | 8.742                 | 695.957         | 2597.203        | 50.28              | 48.03                | n.a.           |
| <b>Total:</b> |           |                       | <b>1384.204</b> | <b>5407.845</b> | <b>100.00</b>      | <b>100.00</b>        |                |

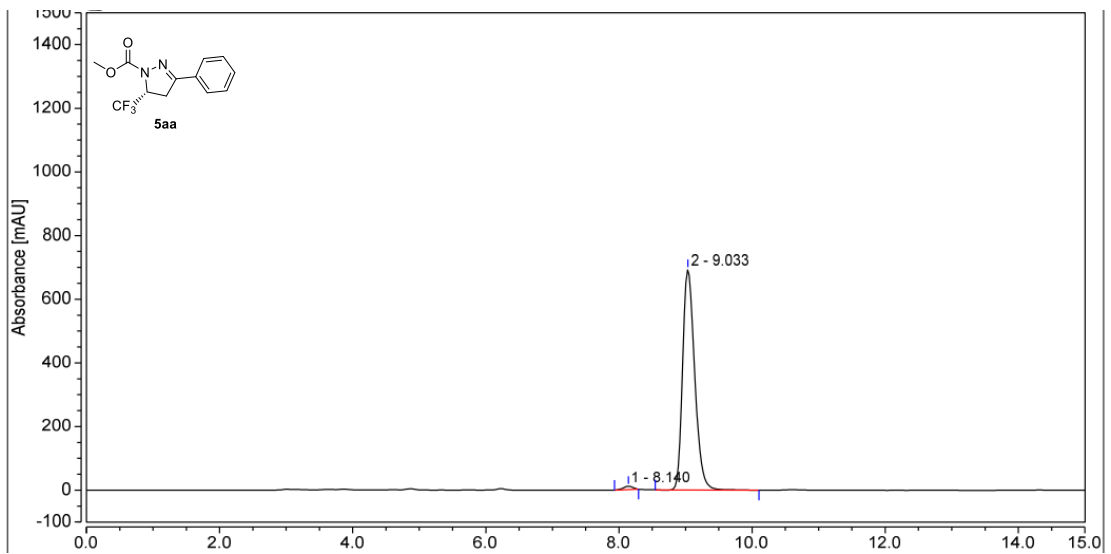

#### Integration Results

| No.           | Peak Name | Retention Time<br>min | Area<br>mAU*min | Height<br>mAU  | Relative Area<br>% | Relative Height<br>% | Amount<br>n.a. |
|---------------|-----------|-----------------------|-----------------|----------------|--------------------|----------------------|----------------|
| 1             |           | 8.140                 | 1.714           | 10.252         | 1.16               | 1.46                 | n.a.           |
| 2             |           | 9.033                 | 145.662         | 692.290        | 98.84              | 98.54                | n.a.           |
| <b>Total:</b> |           |                       | <b>147.375</b>  | <b>702.542</b> | <b>100.00</b>      | <b>100.00</b>        |                |

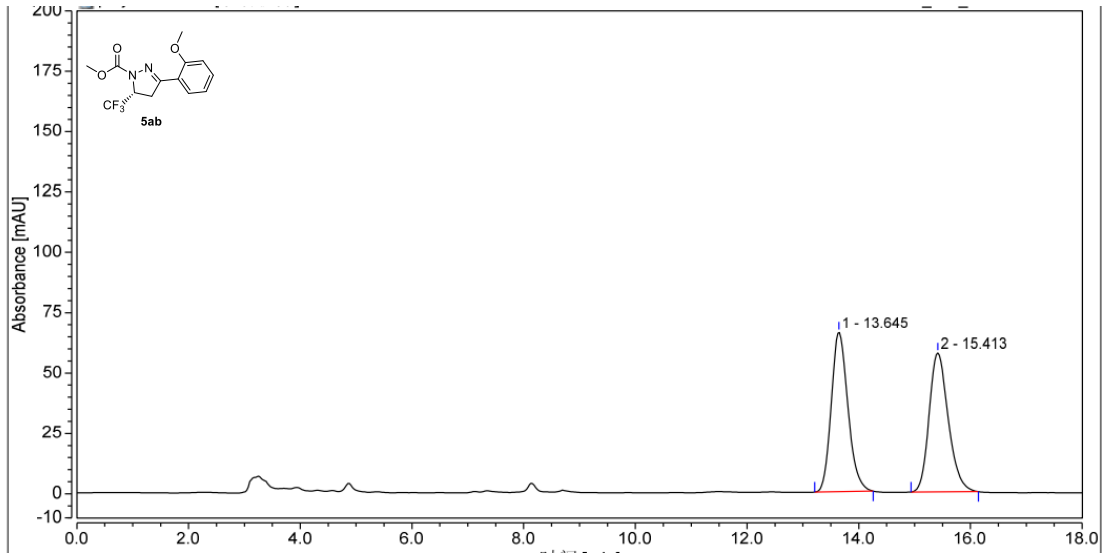

| Integration Results |           |                       |                 |                |                    |                      |                |
|---------------------|-----------|-----------------------|-----------------|----------------|--------------------|----------------------|----------------|
| No.                 | Peak Name | Retention Time<br>min | Area<br>mAU*min | Height<br>mAU  | Relative Area<br>% | Relative Height<br>% | Amount<br>n.a. |
| 1                   |           | 13.645                | 22.890          | 66.115         | 50.07              | 53.45                | n.a.           |
| 2                   |           | 15.413                | 22.825          | 57.571         | 49.93              | 46.55                | n.a.           |
| <b>Total:</b>       |           |                       | <b>45.714</b>   | <b>123.686</b> | <b>100.00</b>      | <b>100.00</b>        |                |

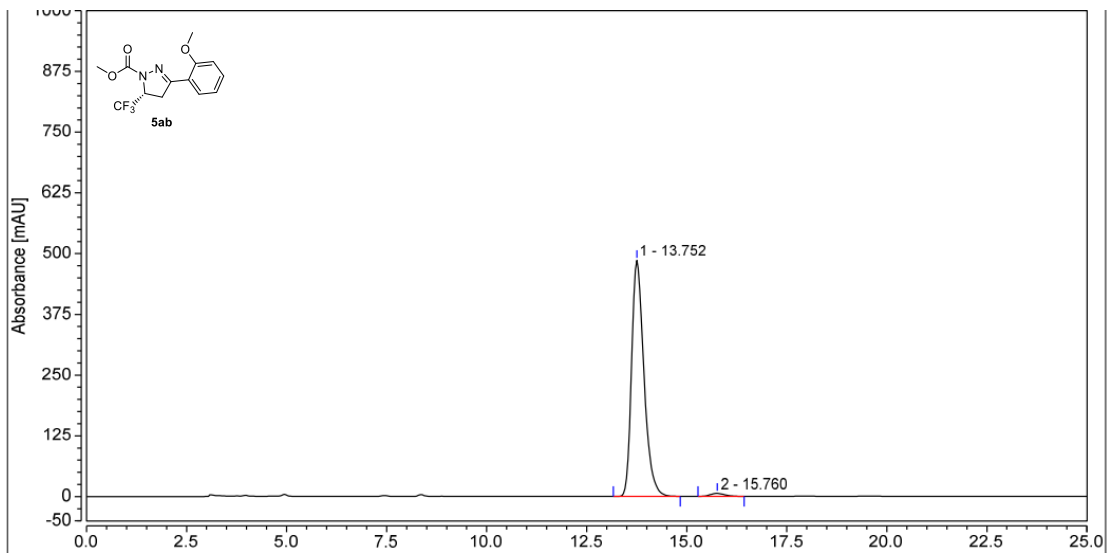

| Integration Results |           |                       |                 |                |                    |                      |                |
|---------------------|-----------|-----------------------|-----------------|----------------|--------------------|----------------------|----------------|
| No.                 | Peak Name | Retention Time<br>min | Area<br>mAU*min | Height<br>mAU  | Relative Area<br>% | Relative Height<br>% | Amount<br>n.a. |
| 1                   |           | 13.752                | 173.918         | 485.946        | 98.54              | 98.74                | n.a.           |
| 2                   |           | 15.760                | 2.568           | 6.211          | 1.46               | 1.26                 | n.a.           |
| <b>Total:</b>       |           |                       | <b>176.487</b>  | <b>492.157</b> | <b>100.00</b>      | <b>100.00</b>        |                |

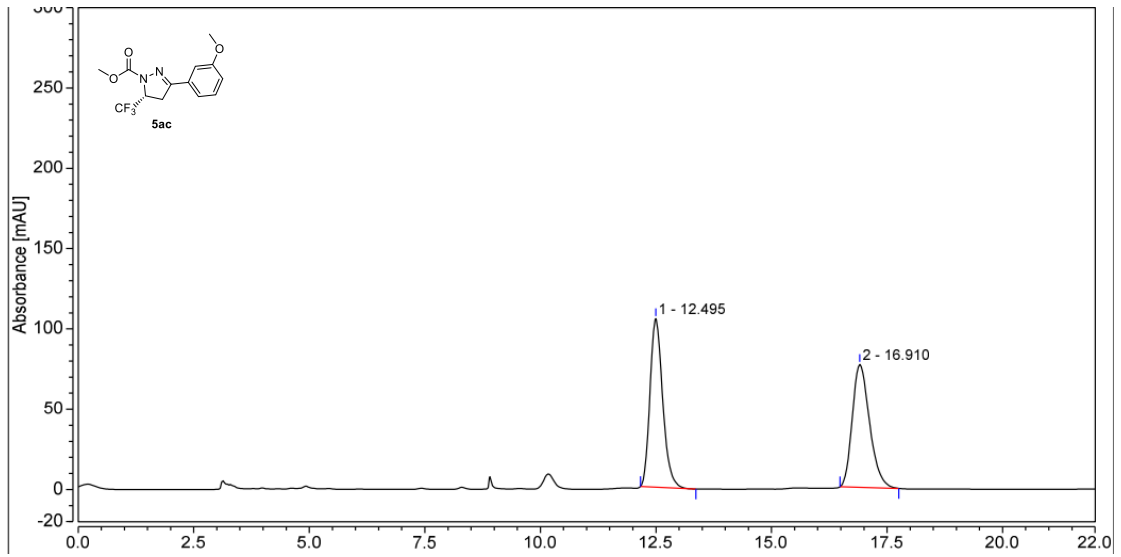

**Integration Results**

| No.           | Peak Name | Retention Time min | Area mAU*min  | Height mAU     | Relative Area % | Relative Height % | Amount |
|---------------|-----------|--------------------|---------------|----------------|-----------------|-------------------|--------|
| 1             |           | 12.495             | 33.517        | 104.985        | 50.19           | 57.84             | n.a.   |
| 2             |           | 16.910             | 33.266        | 76.536         | 49.81           | 42.16             | n.a.   |
| <b>Total:</b> |           |                    | <b>66.783</b> | <b>181.521</b> | <b>100.00</b>   | <b>100.00</b>     |        |

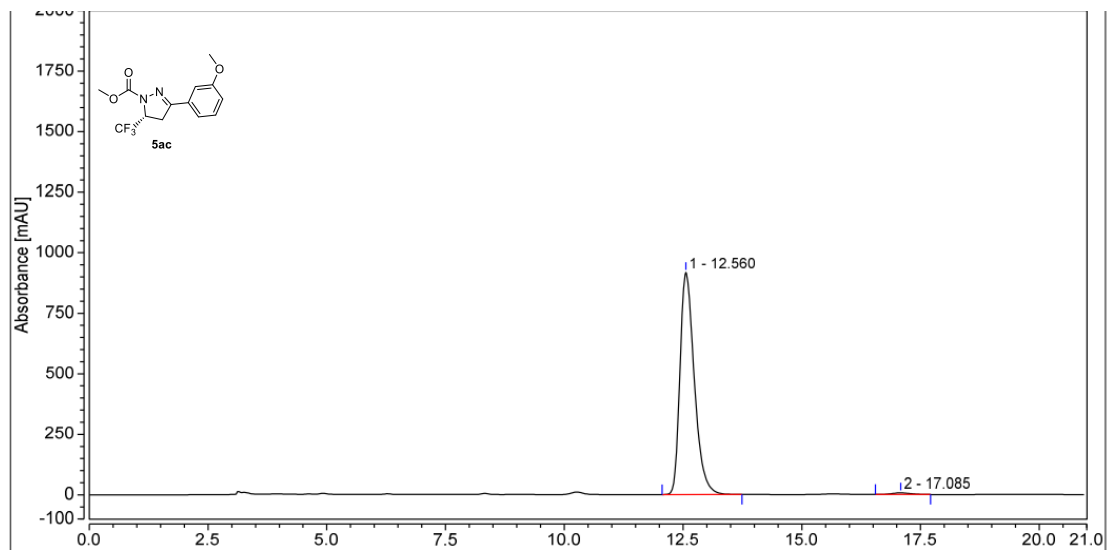

**Integration Results**

| No.           | Peak Name | Retention Time min | Area mAU*min   | Height mAU     | Relative Area % | Relative Height % | Amount |
|---------------|-----------|--------------------|----------------|----------------|-----------------|-------------------|--------|
| 1             |           | 12.560             | 320.533        | 917.082        | 99.08           | 99.26             | n.a.   |
| 2             |           | 17.085             | 2.982          | 6.804          | 0.92            | 0.74              | n.a.   |
| <b>Total:</b> |           |                    | <b>323.515</b> | <b>923.886</b> | <b>100.00</b>   | <b>100.00</b>     |        |

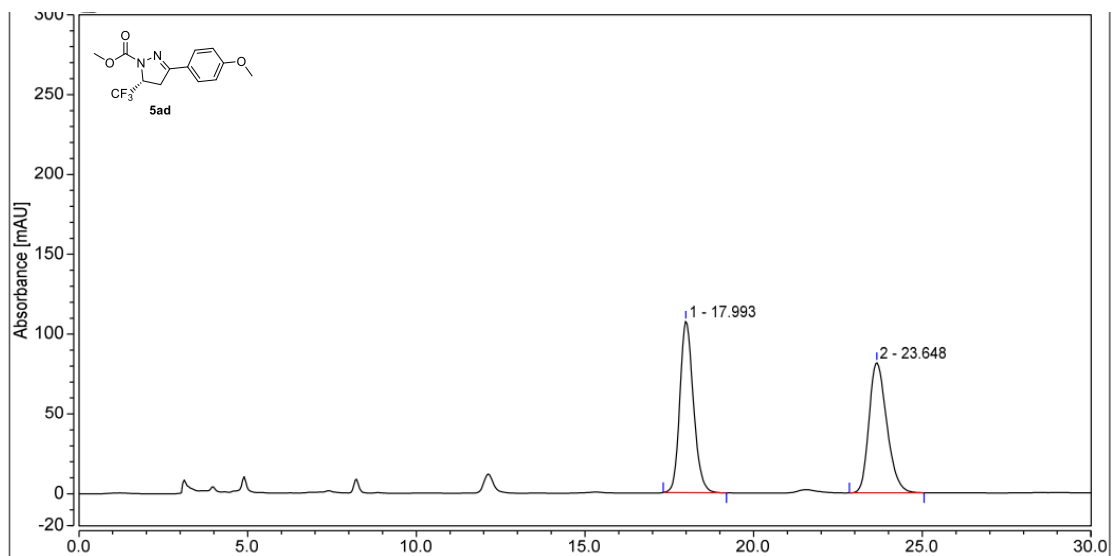

#### Integration Results

| No.           | Peak Name | Retention Time<br>min | Area<br>mAU*min | Height<br>mAU  | Relative Area<br>% | Relative Height<br>% | Amount<br>n.a. |
|---------------|-----------|-----------------------|-----------------|----------------|--------------------|----------------------|----------------|
| 1             |           | 17.993                | 50.195          | 107.509        | 50.10              | 56.86                | n.a.           |
| 2             |           | 23.648                | 49.992          | 81.581         | 49.90              | 43.14                | n.a.           |
| <b>Total:</b> |           |                       | <b>100.187</b>  | <b>189.090</b> | <b>100.00</b>      | <b>100.00</b>        |                |

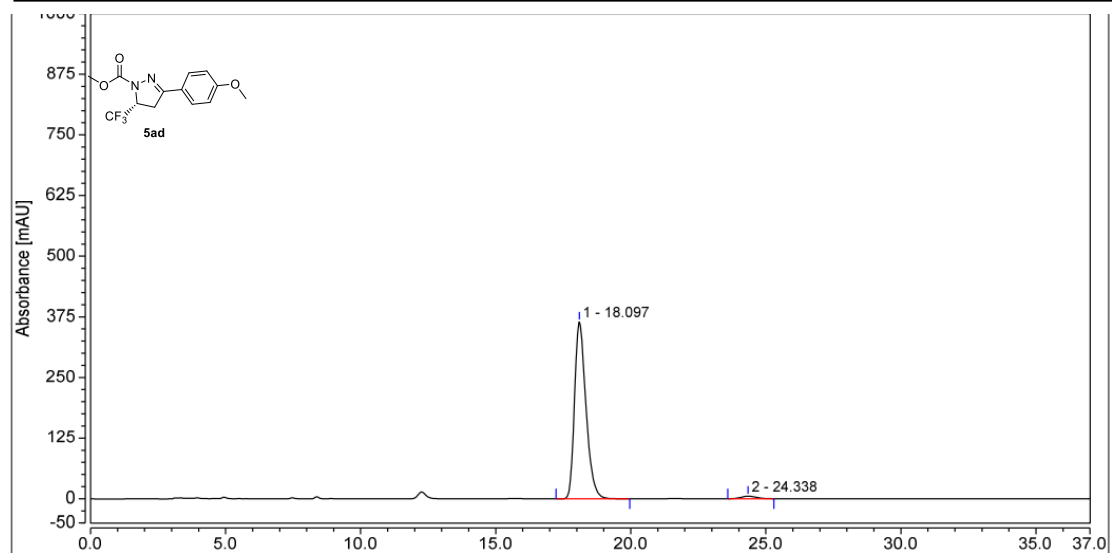

#### Integration Results

| No.           | Peak Name | Retention Time<br>min | Area<br>mAU*min | Height<br>mAU  | Relative Area<br>% | Relative Height<br>% | Amount<br>n.a. |
|---------------|-----------|-----------------------|-----------------|----------------|--------------------|----------------------|----------------|
| 1             |           | 18.097                | 179.621         | 364.531        | 98.12              | 98.60                | n.a.           |
| 2             |           | 24.338                | 3.439           | 5.184          | 1.88               | 1.40                 | n.a.           |
| <b>Total:</b> |           |                       | <b>183.060</b>  | <b>369.716</b> | <b>100.00</b>      | <b>100.00</b>        |                |

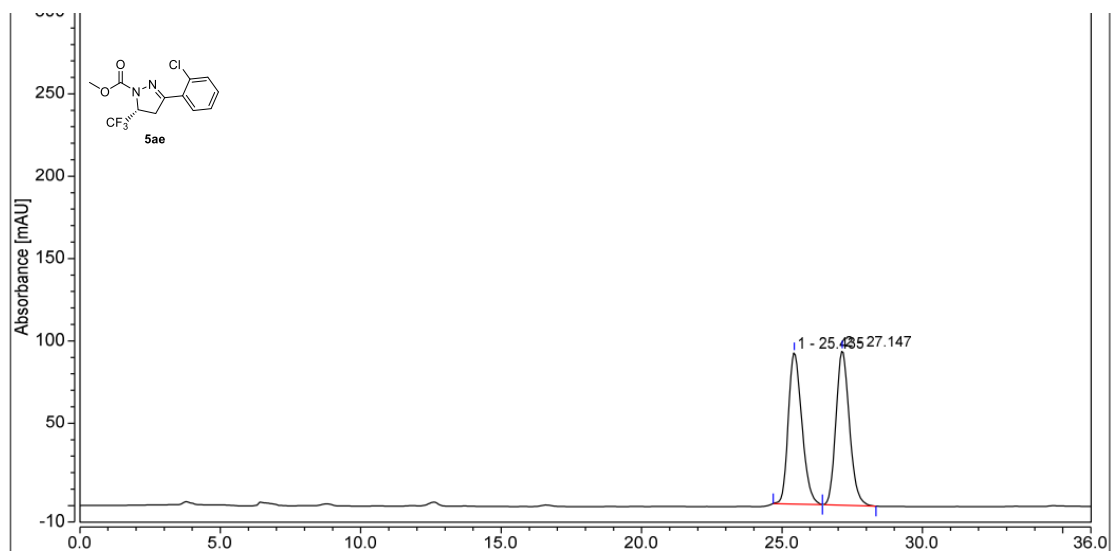

| Integration Results |           |                    |                |                |                 |                   |        |
|---------------------|-----------|--------------------|----------------|----------------|-----------------|-------------------|--------|
| No.                 | Peak Name | Retention Time min | Area mAU*min   | Height mAU     | Relative Area % | Relative Height % | Amount |
| 1                   |           | 25.435             | 51.494         | 91.962         | 49.64           | 49.52             | n.a.   |
| 2                   |           | 27.147             | 52.231         | 93.736         | 50.36           | 50.48             | n.a.   |
| <b>Total:</b>       |           |                    | <b>103.724</b> | <b>185.699</b> | <b>100.00</b>   | <b>100.00</b>     |        |

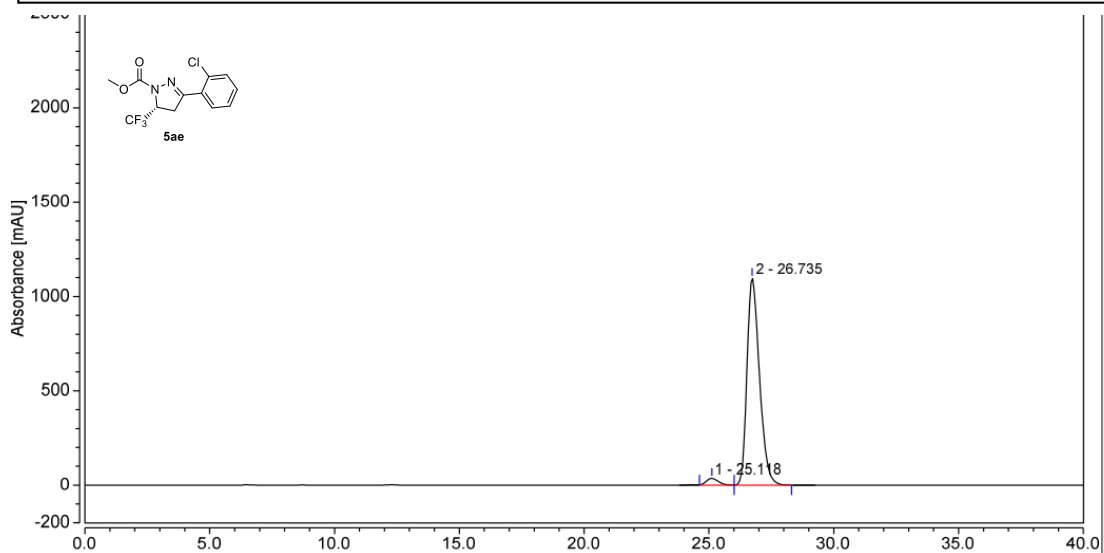

| Integration Results |           |                    |                |                 |                 |                   |        |
|---------------------|-----------|--------------------|----------------|-----------------|-----------------|-------------------|--------|
| No.                 | Peak Name | Retention Time min | Area mAU*min   | Height mAU      | Relative Area % | Relative Height % | Amount |
| 1                   |           | 25.118             | 20.970         | 36.274          | 3.19            | 3.20              | n.a.   |
| 2                   |           | 26.735             | 636.923        | 1097.510        | 96.81           | 96.80             | n.a.   |
| <b>Total:</b>       |           |                    | <b>657.893</b> | <b>1133.784</b> | <b>100.00</b>   | <b>100.00</b>     |        |

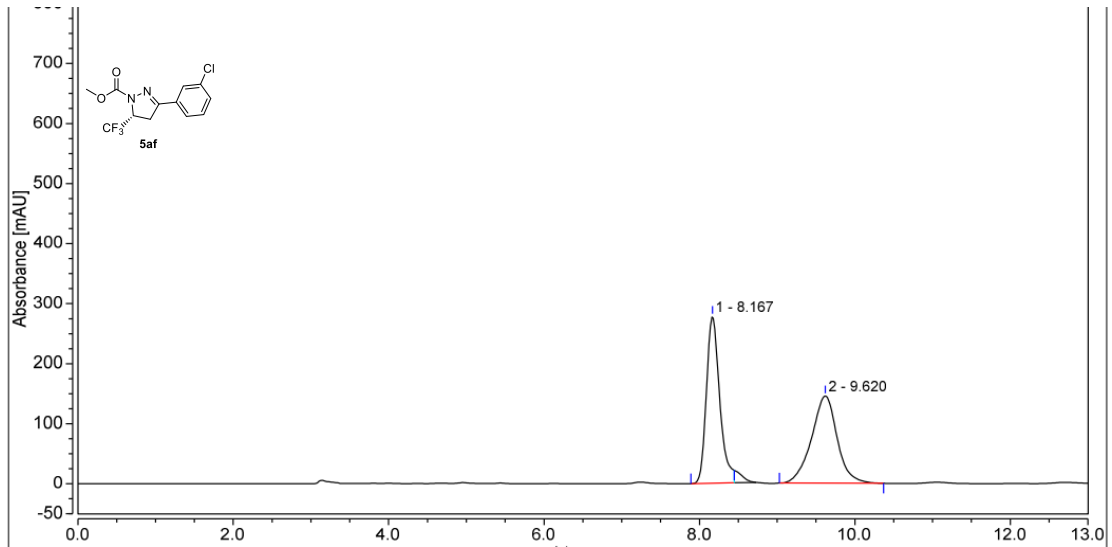

| Integration Results |           |                    |                |                |                 |                   |        |
|---------------------|-----------|--------------------|----------------|----------------|-----------------|-------------------|--------|
| No.                 | Peak Name | Retention Time min | Area mAU*min   | Height mAU     | Relative Area % | Relative Height % | Amount |
| 1                   |           | 8.167              | 55.011         | 278.026        | 49.77           | 65.67             | n.a.   |
| 2                   |           | 9.620              | 55.518         | 145.336        | 50.23           | 34.33             | n.a.   |
| <b>Total:</b>       |           |                    | <b>110.529</b> | <b>423.363</b> | <b>100.00</b>   | <b>100.00</b>     |        |

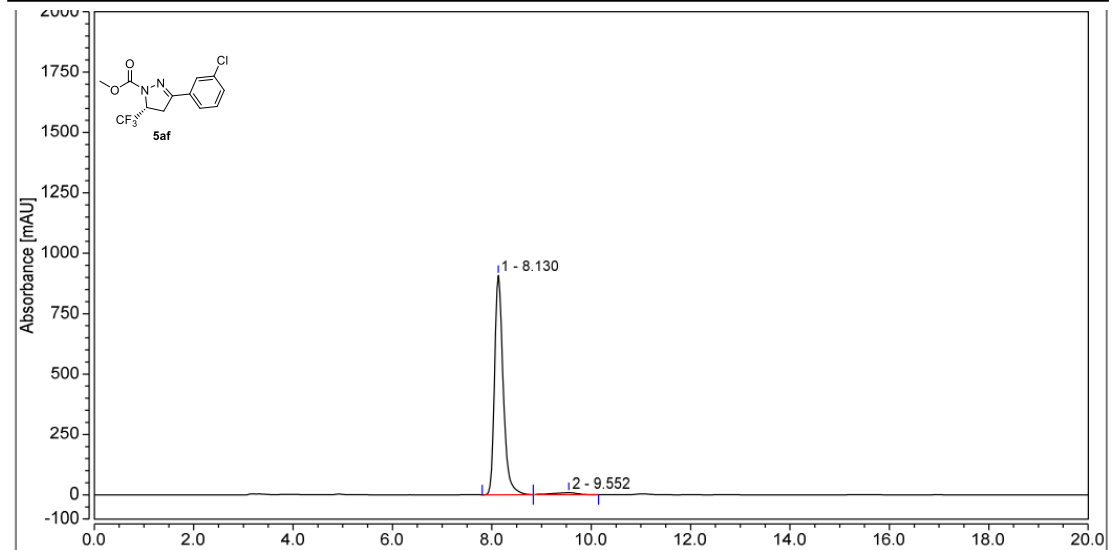

| Integration Results |           |                    |                |                |                 |                   |        |
|---------------------|-----------|--------------------|----------------|----------------|-----------------|-------------------|--------|
| No.                 | Peak Name | Retention Time min | Area mAU*min   | Height mAU     | Relative Area % | Relative Height % | Amount |
| 1                   |           | 8.130              | 182.736        | 908.092        | 97.27           | 99.07             | n.a.   |
| 2                   |           | 9.552              | 5.128          | 8.549          | 2.73            | 0.93              | n.a.   |
| <b>Total:</b>       |           |                    | <b>187.864</b> | <b>916.640</b> | <b>100.00</b>   | <b>100.00</b>     |        |

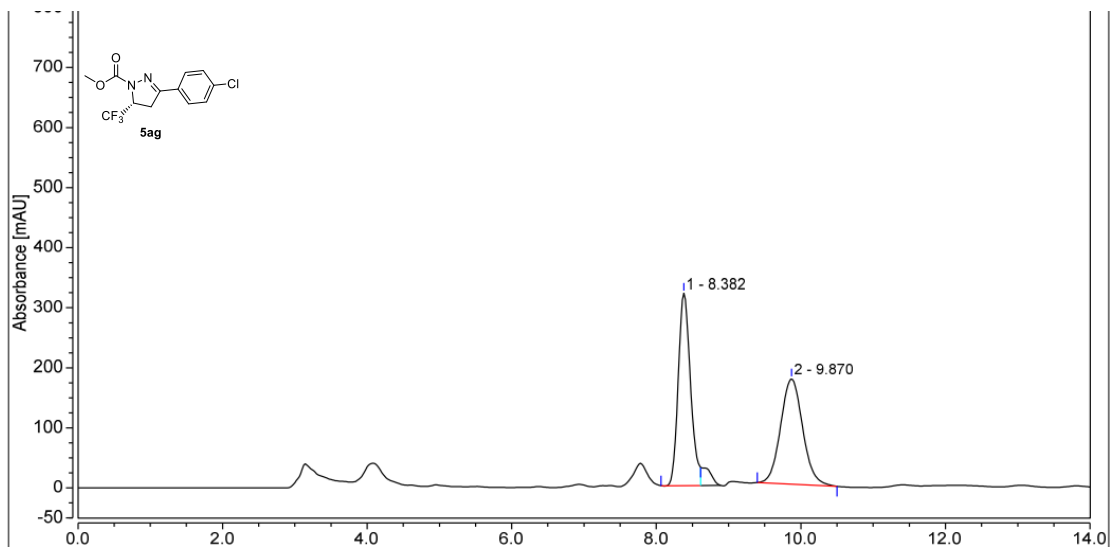

| Integration Results |           |                    |                |                |                 |                   |             |
|---------------------|-----------|--------------------|----------------|----------------|-----------------|-------------------|-------------|
| No.                 | Peak Name | Retention Time min | Area mAU*min   | Height mAU     | Relative Area % | Relative Height % | Amount n.a. |
| 1                   |           | 8.382              | 62.880         | 320.365        | 50.38           | 64.64             | n.a.        |
| 2                   |           | 9.870              | 61.928         | 175.261        | 49.62           | 35.36             | n.a.        |
| <b>Total:</b>       |           |                    | <b>124.808</b> | <b>495.626</b> | <b>100.00</b>   | <b>100.00</b>     |             |

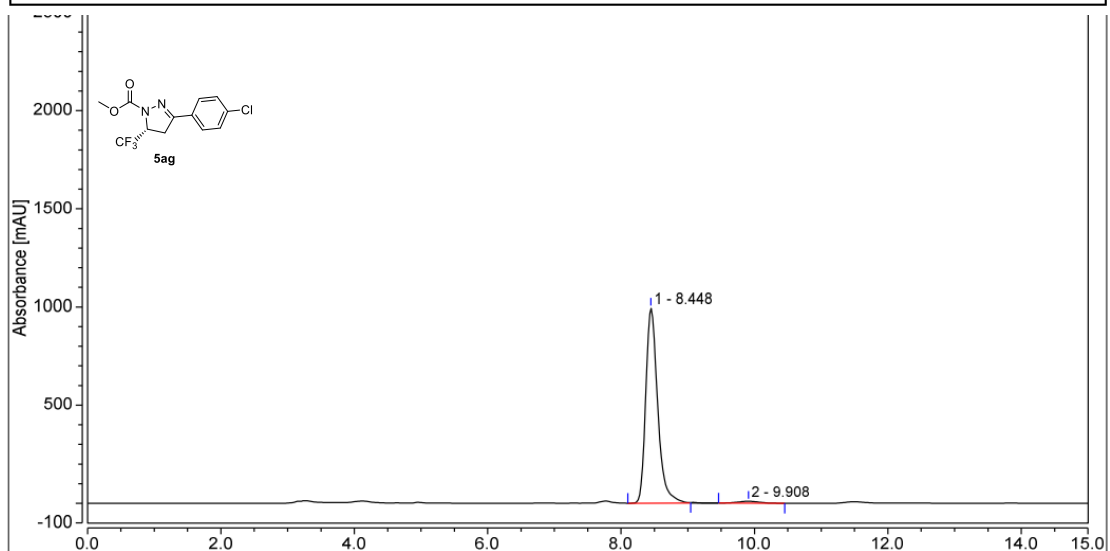

| Integration Results |           |                    |                |                 |                 |                   |             |
|---------------------|-----------|--------------------|----------------|-----------------|-----------------|-------------------|-------------|
| No.                 | Peak Name | Retention Time min | Area mAU*min   | Height mAU      | Relative Area % | Relative Height % | Amount n.a. |
| 1                   |           | 8.448              | 206.147        | 993.950         | 98.29           | 99.04             | n.a.        |
| 2                   |           | 9.908              | 3.587          | 9.609           | 1.71            | 0.96              | n.a.        |
| <b>Total:</b>       |           |                    | <b>209.734</b> | <b>1003.559</b> | <b>100.00</b>   | <b>100.00</b>     |             |
